# Supplementary material for: Soluble amyloid-β precursor peptide does not regulate GABAB receptor activity
Source: eLife. 2023 Jan 23;12:e82082. doi: 10.7554/eLife.82082 (PMC9917443; doi:10.7554/eLife.82082)
Supplement: Figure 1—source data 1. [file elife-82082-fig1-data1.xlsx]

## Sheet: Fig. 1a
	APP17							sc-APP17						APP17-TMR				sc-APP17-TMR
Company	Insight Biotechnology						Company	Insight Biotechnology						Time (min)	Relative intensity (%)			Time (min)	Relative intensity (%)
Product Name	CPEP3190 Ac-DG-17						Product Name	CPEP3191 Ac-DD-17						0	4.96e-05			0	4.45e-05
Instrument No.:	8003						Instrument No.:	8003						0.000833	9.26e-05			0.000833	8.57e-05
Lot No.	P200319-CQ789902						Lot No.	P200319-CQ789903						0.001667	0.000127			0.001667	5.17e-05
Column	COSMOSIL,4.6*250mm,5um, lOOA,Agela						Column	COSMOSIL,4.6*250mm,5um, lOOA,Agela						0.0025	0.000155			0.0025	7.7e-05
Solvent A	0. 1% trifluoroacetic in 100% acetonitrile						Solvent A	0. 1% trifluoroacetic in 100% acetonitrile						0.003333	0.000185			0.003333	0.000133
Solvent B	0. 1% trifluoroacetic in 100% water						Solvent B	0. 1% trifluoroacetic in 100% water						0.004167	0.000169			0.004167	0.000144
Gradient		A		B			Gradient		A		B			0.005	0.000167			0.005	0.000165
	0.01min	0.24		0.76				0.01min	0.23		0.77			0.005833	0.000168			0.005833	0.000226
	25min	0.49		0.51				25min	0.48		0.52			0.006667	0.000171			0.006667	0.000226
	25.1min	1		0				25.1min	1		0			0.0075	0.000179			0.0075	0.000198
	30min		Stop					30min		Stop				0.008333	0.000253			0.008333	0.000193
														0.009167	0.00027			0.009167	0.000209
Flow rate	1.0ml/min						Flow rate	1.0ml/min						0.01	0.000297			0.01	0.000172
Wavelength	220nm						Wavelength	220nm						0.010833	0.000345			0.010833	0.000152
Volume	10ul						Volume	10ul						0.011667	0.00038			0.011667	0.000151
														0.0125	0.000351			0.0125	0.000192
Peak No.	Ret Time	Conc	Area	Height			Peak No.	Ret Time	Conc	Area	Height			0.013333	0.000387			0.013333	0.000183
1	9.11	0.5721	24369	6221			1	10.386	0.2434	43568	7208			0.014167	0.000401			0.014167	0.000233
2	9.213	98.44	4192945	373331			2	10.742	98.15	17565930	1506977			0.015	0.000384			0.015	0.000298
3	9.52	0.9889	42123	3938			3	11.141	1.61	288088	39985			0.015833	0.000365			0.015833	0.000332
Total		100	4259437	383490			Total			17897586	1554170			0.016667	0.000395			0.016667	0.000315
														0.0175	0.000376			0.0175	0.000315
														0.018333	0.000409			0.018333	0.000255
														0.019167	0.000448			0.019167	0.000219
														0.02	0.000491			0.02	0.000224
														0.020833	0.000521			0.020833	0.000224
														0.021667	0.000588			0.021667	0.000263
														0.0225	0.000578			0.0225	0.00035
														0.023333	0.000595			0.023333	0.000385
														0.024167	0.000637			0.024167	0.000394
														0.025	0.000631			0.025	0.000424
														0.025833	0.000587			0.025833	0.000387
														0.026667	0.000583			0.026667	0.000329
														0.0275	0.000564			0.0275	0.000306
														0.028333	0.00049			0.028333	0.000292
														0.029167	0.000489			0.029167	0.000287
														0.03	0.000495			0.03	0.000331
														0.030833	0.000498			0.030833	0.000394
														0.031667	0.000489			0.031667	0.000439
														0.0325	0.000536			0.0325	0.000474
														0.033333	0.00053			0.033333	0.000487
														0.034167	0.000569			0.034167	0.000483
														0.035	0.000621			0.035	0.000451
														0.035833	0.000693			0.035833	0.000435
														0.036667	0.000706			0.036667	0.000442
														0.0375	0.000741			0.0375	0.000448
														0.038333	0.000745			0.038333	0.000475
														0.039167	0.000726			0.039167	0.000502
														0.04	0.000669			0.04	0.000508
														0.040833	0.000691			0.040833	0.0005
														0.041667	0.0007			0.041667	0.000511
														0.0425	0.000704			0.0425	0.000502
														0.043333	0.00073			0.043333	0.000514
														0.044167	0.000797			0.044167	0.000545
														0.045	0.000811			0.045	0.000572
														0.045833	0.000839			0.045833	0.000557
														0.046667	0.00088			0.046667	0.000564
														0.0475	0.000883			0.0475	0.000585
														0.048333	0.000888			0.048333	0.000625
														0.049167	0.000901			0.049167	0.000635
														0.05	0.000906			0.05	0.0007
														0.050833	0.000897			0.050833	0.000748
														0.051667	0.000939			0.051667	0.000756
														0.0525	0.000944			0.0525	0.000725
														0.053333	0.000964			0.053333	0.000759
														0.054167	0.000995			0.054167	0.000781
														0.055	0.001052			0.055	0.000805
														0.055833	0.001076			0.055833	0.000843
														0.056667	0.001143			0.056667	0.000888
														0.0575	0.001177			0.0575	0.00088
														0.058333	0.00118			0.058333	0.000853
														0.059167	0.001189			0.059167	0.000805
														0.06	0.001213			0.06	0.000788
														0.060833	0.001183			0.060833	0.000764
														0.061667	0.001182			0.061667	0.00078
														0.0625	0.001205			0.0625	0.000809
														0.063333	0.001185			0.063333	0.000851
														0.064167	0.00119			0.064167	0.000871
														0.065	0.001223			0.065	0.000897
														0.065833	0.00126			0.065833	0.000931
														0.066667	0.001287			0.066667	0.000954
														0.0675	0.001319			0.0675	0.000988
														0.068333	0.00128			0.068333	0.001014
														0.069167	0.001259			0.069167	0.001062
														0.07	0.00122			0.07	0.00105
														0.070833	0.001199			0.070833	0.001051
														0.071667	0.001191			0.071667	0.001061
														0.0725	0.001224			0.0725	0.001073
														0.073333	0.001259			0.073333	0.001041
														0.074167	0.001317			0.074167	0.001032
														0.075	0.001351			0.075	0.001014
														0.075833	0.001412			0.075833	0.000976
														0.076667	0.001485			0.076667	0.000929
														0.0775	0.001514			0.0775	0.000911
														0.078333	0.001499			0.078333	0.000938
														0.079167	0.001493			0.079167	0.00096
														0.08	0.001463			0.08	0.000991
														0.080833	0.001395			0.080833	0.00104
														0.081667	0.00136			0.081667	0.001081
														0.0825	0.001358			0.0825	0.001105
														0.083333	0.001347			0.083333	0.00112
														0.084167	0.001311			0.084167	0.001136
														0.085	0.001316			0.085	0.001128
														0.085833	0.001311			0.085833	0.001148
														0.086667	0.001301			0.086667	0.001123
														0.0875	0.001297			0.0875	0.001119
														0.088333	0.001342			0.088333	0.001097
														0.089167	0.001369			0.089167	0.001089
														0.09	0.001378			0.09	0.001059
														0.090833	0.001402			0.090833	0.001077
														0.091667	0.001455			0.091667	0.001086
														0.0925	0.001457			0.0925	0.001105
														0.093333	0.001453			0.093333	0.001145
														0.094167	0.001475			0.094167	0.001173
														0.095	0.001453			0.095	0.001165
														0.095833	0.0014			0.095833	0.001158
														0.096667	0.001354			0.096667	0.001157
														0.0975	0.001344			0.0975	0.001146
														0.098333	0.00134			0.098333	0.001119
														0.099167	0.001357			0.099167	0.001108
														0.1	0.001406			0.1	0.001094
														0.100833	0.001456			0.100833	0.001092
														0.101667	0.00147			0.101667	0.001062
														0.1025	0.001444			0.1025	0.00108
														0.103333	0.001432			0.103333	0.001086
														0.104167	0.001377			0.104167	0.001112
														0.105	0.001382			0.105	0.001112
														0.105833	0.001402			0.105833	0.001133
														0.106667	0.001445			0.106667	0.001154
														0.1075	0.001481			0.1075	0.001186
														0.108333	0.001529			0.108333	0.001186
														0.109167	0.001515			0.109167	0.001168
														0.11	0.001471			0.11	0.001157
														0.110833	0.001445			0.110833	0.001077
														0.111667	0.001431			0.111667	0.001021
														0.1125	0.001411			0.1125	0.000985
														0.113333	0.001393			0.113333	0.000993
														0.114167	0.001397			0.114167	0.000968
														0.115	0.001379			0.115	0.001009
														0.115833	0.001342			0.115833	0.00102
														0.116667	0.001325			0.116667	0.001018
														0.1175	0.001317			0.1175	0.001029
														0.118333	0.00131			0.118333	0.001081
														0.119167	0.001337			0.119167	0.001115
														0.12	0.001369			0.12	0.00116
														0.120833	0.001393			0.120833	0.001219
														0.121667	0.001404			0.121667	0.001228
														0.1225	0.00144			0.1225	0.001193
														0.123333	0.001415			0.123333	0.001146
														0.124167	0.00138			0.124167	0.001072
														0.125	0.001356			0.125	0.001005
														0.125833	0.001353			0.125833	0.000961
														0.126667	0.001315			0.126667	0.000973
														0.1275	0.001346			0.1275	0.000975
														0.128333	0.001384			0.128333	0.000997
														0.129167	0.001437			0.129167	0.000979
														0.13	0.001448			0.13	0.000955
														0.130833	0.001457			0.130833	0.000885
														0.131667	0.001382			0.131667	0.000862
														0.1325	0.001314			0.1325	0.000853
														0.133333	0.001198			0.133333	0.000862
														0.134167	0.001144			0.134167	0.000882
														0.135	0.001104			0.135	0.000893
														0.135833	0.001138			0.135833	0.000864
														0.136667	0.001153			0.136667	0.000836
														0.1375	0.001184			0.1375	0.000813
														0.138333	0.001184			0.138333	0.000775
														0.139167	0.001187			0.139167	0.000752
														0.14	0.001166			0.14	0.000773
														0.140833	0.00117			0.140833	0.000772
														0.141667	0.001193			0.141667	0.000753
														0.1425	0.001215			0.1425	0.000745
														0.143333	0.001241			0.143333	0.000773
														0.144167	0.00125			0.144167	0.000743
														0.145	0.001237			0.145	0.000699
														0.145833	0.001219			0.145833	0.000712
														0.146667	0.001192			0.146667	0.00067
														0.1475	0.001126			0.1475	0.000621
														0.148333	0.00109			0.148333	0.000573
														0.149167	0.001075			0.149167	0.000572
														0.15	0.001052			0.15	0.000518
														0.150833	0.001043			0.150833	0.00056
														0.151667	0.001074			0.151667	0.000564
														0.1525	0.001095			0.1525	0.000614
														0.153333	0.001072			0.153333	0.000622
														0.154167	0.001067			0.154167	0.000634
														0.155	0.001063			0.155	0.000581
														0.155833	0.001051			0.155833	0.00057
														0.156667	0.001029			0.156667	0.000495
														0.1575	0.001054			0.1575	0.000488
														0.158333	0.001047			0.158333	0.000489
														0.159167	0.001049			0.159167	0.000519
														0.16	0.00105			0.16	0.000523
														0.160833	0.001045			0.160833	0.000602
														0.161667	0.001031			0.161667	0.000591
														0.1625	0.001045			0.1625	0.000592
														0.163333	0.001028			0.163333	0.000588
														0.164167	0.001022			0.164167	0.000602
														0.165	0.001033			0.165	0.000585
														0.165833	0.00106			0.165833	0.000635
														0.166667	0.001054			0.166667	0.000666
														0.1675	0.001053			0.1675	0.000688
														0.168333	0.001014			0.168333	0.000682
														0.169167	0.000985			0.169167	0.000672
														0.17	0.000913			0.17	0.000636
														0.170833	0.000899			0.170833	0.000603
														0.171667	0.000912			0.171667	0.00057
														0.1725	0.000961			0.1725	0.000537
														0.173333	0.000977			0.173333	0.000517
														0.174167	0.001011			0.174167	0.000503
														0.175	0.001002			0.175	0.000496
														0.175833	0.000976			0.175833	0.000517
														0.176667	0.000943			0.176667	0.000553
														0.1775	0.000928			0.1775	0.000565
														0.178333	0.00091			0.178333	0.000561
														0.179167	0.000898			0.179167	0.00058
														0.18	0.000893			0.18	0.000571
														0.180833	0.000884			0.180833	0.000567
														0.181667	0.000877			0.181667	0.000589
														0.1825	0.000871			0.1825	0.000637
														0.183333	0.000878			0.183333	0.000658
														0.184167	0.000883			0.184167	0.000705
														0.185	0.000889			0.185	0.000734
														0.185833	0.000895			0.185833	0.000784
														0.186667	0.000904			0.186667	0.000792
														0.1875	0.000934			0.1875	0.000776
														0.188333	0.000939			0.188333	0.000731
														0.189167	0.000936			0.189167	0.000708
														0.19	0.000955			0.19	0.000615
														0.190833	0.000991			0.190833	0.000568
														0.191667	0.000966			0.191667	0.000568
														0.1925	0.000966			0.1925	0.000567
														0.193333	0.000998			0.193333	0.000566
														0.194167	0.000997			0.194167	0.000636
														0.195	0.000969			0.195	0.000688
														0.195833	0.000976			0.195833	0.000702
														0.196667	0.000986			0.196667	0.000766
														0.1975	0.000986			0.1975	0.000811
														0.198333	0.000989			0.198333	0.000811
														0.199167	0.00102			0.199167	0.000856
														0.2	0.00106			0.2	0.000895
														0.200833	0.001089			0.200833	0.000878
														0.201667	0.00111			0.201667	0.000853
														0.2025	0.001136			0.2025	0.00085
														0.203333	0.001157			0.203333	0.000773
														0.204167	0.001146			0.204167	0.00074
														0.205	0.00113			0.205	0.000738
														0.205833	0.001141			0.205833	0.000754
														0.206667	0.001143			0.206667	0.000777
														0.2075	0.001132			0.2075	0.000815
														0.208333	0.001143			0.208333	0.000854
														0.209167	0.00116			0.209167	0.000864
														0.21	0.001145			0.21	0.000875
														0.210833	0.001167			0.210833	0.00087
														0.211667	0.001169			0.211667	0.000889
														0.2125	0.001188			0.2125	0.000853
														0.213333	0.001214			0.213333	0.000833
														0.214167	0.001228			0.214167	0.000808
														0.215	0.001222			0.215	0.000769
														0.215833	0.001241			0.215833	0.000748
														0.216667	0.001247			0.216667	0.000782
														0.2175	0.001241			0.2175	0.00082
														0.218333	0.001238			0.218333	0.000853
														0.219167	0.001202			0.219167	0.000902
														0.22	0.00118			0.22	0.000909
														0.220833	0.001133			0.220833	0.000903
														0.221667	0.001107			0.221667	0.000869
														0.2225	0.001114			0.2225	0.000851
														0.223333	0.001179			0.223333	0.000819
														0.224167	0.001231			0.224167	0.000823
														0.225	0.00128			0.225	0.000795
														0.225833	0.001317			0.225833	0.000823
														0.226667	0.001319			0.226667	0.000855
														0.2275	0.001285			0.2275	0.000899
														0.228333	0.001248			0.228333	0.000901
														0.229167	0.001247			0.229167	0.00094
														0.23	0.00125			0.23	0.000933
														0.230833	0.001279			0.230833	0.000905
														0.231667	0.001311			0.231667	0.000898
														0.2325	0.001335			0.2325	0.000903
														0.233333	0.001345			0.233333	0.000889
														0.234167	0.001345			0.234167	0.000876
														0.235	0.001306			0.235	0.000892
														0.235833	0.001286			0.235833	0.000857
														0.236667	0.001258			0.236667	0.000839
														0.2375	0.001226			0.2375	0.000831
														0.238333	0.001182			0.238333	0.00083
														0.239167	0.001178			0.239167	0.00079
														0.24	0.001135			0.24	0.000815
														0.240833	0.001113			0.240833	0.0008
														0.241667	0.001086			0.241667	0.000779
														0.2425	0.001083			0.2425	0.000763
														0.243333	0.001066			0.243333	0.000767
														0.244167	0.001059			0.244167	0.000753
														0.245	0.001071			0.245	0.000792
														0.245833	0.001082			0.245833	0.000812
														0.246667	0.001088			0.246667	0.000869
														0.2475	0.001093			0.2475	0.000911
														0.248333	0.001132			0.248333	0.000913
														0.249167	0.001158			0.249167	0.000885
														0.25	0.001189			0.25	0.000893
														0.250833	0.001217			0.250833	0.000854
														0.251667	0.001274			0.251667	0.000835
														0.2525	0.001297			0.2525	0.000825
														0.253333	0.00128			0.253333	0.000837
														0.254167	0.001255			0.254167	0.000825
														0.255	0.001237			0.255	0.000816
														0.255833	0.001166			0.255833	0.000805
														0.256667	0.001095			0.256667	0.000804
														0.2575	0.001071			0.2575	0.000803
														0.258333	0.001056			0.258333	0.000799
														0.259167	0.001025			0.259167	0.000787
														0.26	0.00104			0.26	0.000773
														0.260833	0.001059			0.260833	0.000764
														0.261667	0.00106			0.261667	0.000716
														0.2625	0.00108			0.2625	0.000698
														0.263333	0.00112			0.263333	0.000685
														0.264167	0.001137			0.264167	0.000676
														0.265	0.001148			0.265	0.000675
														0.265833	0.001177			0.265833	0.000699
														0.266667	0.001152			0.266667	0.000707
														0.2675	0.001112			0.2675	0.000716
														0.268333	0.001086			0.268333	0.000705
														0.269167	0.001101			0.269167	0.000694
														0.27	0.001086			0.27	0.000687
														0.270833	0.001125			0.270833	0.000667
														0.271667	0.001161			0.271667	0.000684
														0.2725	0.001182			0.2725	0.000683
														0.273333	0.001156			0.273333	0.000664
														0.274167	0.001139			0.274167	0.000639
														0.275	0.001122			0.275	0.000623
														0.275833	0.001087			0.275833	0.00058
														0.276667	0.00106			0.276667	0.000604
														0.2775	0.001049			0.2775	0.00063
														0.278333	0.001031			0.278333	0.00068
														0.279167	0.000968			0.279167	0.000731
														0.28	0.000956			0.28	0.000758
														0.280833	0.00092			0.280833	0.000736
														0.281667	0.00089			0.281667	0.000729
														0.2825	0.000888			0.2825	0.000666
														0.283333	0.000918			0.283333	0.000612
														0.284167	0.000893			0.284167	0.000565
														0.285	0.000919			0.285	0.000539
														0.285833	0.000935			0.285833	0.000492
														0.286667	0.000918			0.286667	0.000494
														0.2875	0.000906			0.2875	0.000453
														0.288333	0.000935			0.288333	0.000444
														0.289167	0.000931			0.289167	0.000458
														0.29	0.000952			0.29	0.000451
														0.290833	0.000985			0.290833	0.000411
														0.291667	0.000992			0.291667	0.000438
														0.2925	0.001			0.2925	0.000452
														0.293333	0.001012			0.293333	0.000415
														0.294167	0.000968			0.294167	0.000441
														0.295	0.000947			0.295	0.000494
														0.295833	0.000931			0.295833	0.000509
														0.296667	0.000922			0.296667	0.000492
														0.2975	0.000873			0.2975	0.000493
														0.298333	0.000887			0.298333	0.000447
														0.299167	0.000819			0.299167	0.000401
														0.3	0.000811			0.3	0.000354
														0.300833	0.000759			0.300833	0.000361
														0.301667	0.000772			0.301667	0.000386
														0.3025	0.000758			0.3025	0.00045
														0.303333	0.000871			0.303333	0.000495
														0.304167	0.000927			0.304167	0.000579
														0.305	0.000994			0.305	0.000641
														0.305833	0.001058			0.305833	0.000697
														0.306667	0.00113			0.306667	0.000754
														0.3075	0.001133			0.3075	0.000877
														0.308333	0.001142			0.308333	0.000968
														0.309167	0.001202			0.309167	0.001066
														0.31	0.001231			0.31	0.001174
														0.310833	0.001266			0.310833	0.001269
														0.311667	0.001303			0.311667	0.001295
														0.3125	0.001353			0.3125	0.001337
														0.313333	0.001318			0.313333	0.001361
														0.314167	0.001331			0.314167	0.001366
														0.315	0.001335			0.315	0.001351
														0.315833	0.00134			0.315833	0.001369
														0.316667	0.001328			0.316667	0.001336
														0.3175	0.001402			0.3175	0.00131
														0.318333	0.001406			0.318333	0.001293
														0.319167	0.001417			0.319167	0.001292
														0.32	0.001442			0.32	0.001269
														0.320833	0.00148			0.320833	0.001297
														0.321667	0.001488			0.321667	0.001337
														0.3225	0.001528			0.3225	0.001339
														0.323333	0.001563			0.323333	0.001364
														0.324167	0.001601			0.324167	0.001392
														0.325	0.001648			0.325	0.001404
														0.325833	0.001674			0.325833	0.001388
														0.326667	0.001721			0.326667	0.001433
														0.3275	0.001761			0.3275	0.001471
														0.328333	0.001786			0.328333	0.001525
														0.329167	0.001826			0.329167	0.001605
														0.33	0.001891			0.33	0.001739
														0.330833	0.001954			0.330833	0.001818
														0.331667	0.002017			0.331667	0.001866
														0.3325	0.002112			0.3325	0.001902
														0.333333	0.00216			0.333333	0.001917
														0.334167	0.002197			0.334167	0.001887
														0.335	0.002222			0.335	0.001943
														0.335833	0.002286			0.335833	0.002014
														0.336667	0.002324			0.336667	0.00209
														0.3375	0.002415			0.3375	0.00218
														0.338333	0.002553			0.338333	0.002279
														0.339167	0.002712			0.339167	0.002309
														0.34	0.002854			0.34	0.002393
														0.340833	0.003031			0.340833	0.002501
														0.341667	0.003211			0.341667	0.002649
														0.3425	0.003375			0.3425	0.002837
														0.343333	0.003552			0.343333	0.003079
														0.344167	0.003726			0.344167	0.003303
														0.345	0.003907			0.345	0.003515
														0.345833	0.004065			0.345833	0.003689
														0.346667	0.00421			0.346667	0.003869
														0.3475	0.004332			0.3475	0.004023
														0.348333	0.004447			0.348333	0.004149
														0.349167	0.004544			0.349167	0.004282
														0.35	0.004652			0.35	0.00442
														0.350833	0.004777			0.350833	0.00452
														0.351667	0.004912			0.351667	0.004653
														0.3525	0.00513			0.3525	0.004829
														0.353333	0.005379			0.353333	0.005082
														0.354167	0.005696			0.354167	0.005384
														0.355	0.006124			0.355	0.005786
														0.355833	0.006682			0.355833	0.006267
														0.356667	0.007302			0.356667	0.006882
														0.3575	0.008128			0.3575	0.007561
														0.358333	0.009295			0.358333	0.008497
														0.359167	0.011163			0.359167	0.009883
														0.36	0.014597			0.36	0.012213
														0.360833	0.020989			0.360833	0.016362
														0.361667	0.032251			0.361667	0.023968
														0.3625	0.050878			0.3625	0.037084
														0.363333	0.079404			0.363333	0.058157
														0.364167	0.119813			0.364167	0.089576
														0.365	0.173233			0.365	0.133253
														0.365833	0.239135			0.365833	0.189611
														0.366667	0.315186			0.366667	0.257709
														0.3675	0.397497			0.3675	0.334745
														0.368333	0.481414			0.368333	0.416731
														0.369167	0.561328			0.369167	0.498639
														0.37	0.632673			0.37	0.575465
														0.370833	0.691531			0.370833	0.642219
														0.371667	0.735434			0.371667	0.695867
														0.3725	0.762411			0.3725	0.733935
														0.373333	0.772707			0.373333	0.755061
														0.374167	0.766367			0.374167	0.759357
														0.375	0.744573			0.375	0.747996
														0.375833	0.708582			0.375833	0.721514
														0.376667	0.660893			0.376667	0.681664
														0.3775	0.60327			0.3775	0.630769
														0.378333	0.538338			0.378333	0.570883
														0.379167	0.468642			0.379167	0.504325
														0.38	0.397176			0.38	0.434229
														0.380833	0.326394			0.380833	0.363254
														0.381667	0.258976			0.381667	0.294025
														0.3825	0.197023			0.3825	0.228867
														0.383333	0.142261			0.383333	0.169886
														0.384167	0.095469			0.384167	0.118235
														0.385	0.056983			0.385	0.074707
														0.385833	0.026462			0.385833	0.039324
														0.386667	0.003246			0.386667	0.011741
														0.3875	-0.01375			0.3875	-0.00899
														0.388333	-0.02555			0.388333	-0.02383
														0.389167	-0.03323			0.389167	-0.03388
														0.39	-0.03778			0.39	-0.04022
														0.390833	-0.04005			0.390833	-0.04378
														0.391667	-0.04069			0.391667	-0.0453
														0.3925	-0.04021			0.3925	-0.04537
														0.393333	-0.03899			0.393333	-0.04445
														0.394167	-0.03732			0.394167	-0.04286
														0.395	-0.03534			0.395	-0.04086
														0.395833	-0.03318			0.395833	-0.0386
														0.396667	-0.03098			0.396667	-0.03624
														0.3975	-0.02879			0.3975	-0.03387
														0.398333	-0.02666			0.398333	-0.03151
														0.399167	-0.02457			0.399167	-0.02917
														0.4	-0.02265			0.4	-0.027
														0.400833	-0.02083			0.400833	-0.0249
														0.401667	-0.01914			0.401667	-0.02291
														0.4025	-0.01758			0.4025	-0.02109
														0.403333	-0.01623			0.403333	-0.01943
														0.404167	-0.01502			0.404167	-0.01785
														0.405	-0.01393			0.405	-0.01645
														0.405833	-0.01299			0.405833	-0.01524
														0.406667	-0.01221			0.406667	-0.01415
														0.4075	-0.01149			0.4075	-0.01321
														0.408333	-0.01086			0.408333	-0.01245
														0.409167	-0.01035			0.409167	-0.01179
														0.41	-0.00991			0.41	-0.01122
														0.410833	-0.00955			0.410833	-0.01075
														0.411667	-0.00932			0.411667	-0.01036
														0.4125	-0.0092			0.4125	-0.01005
														0.413333	-0.00914			0.413333	-0.00981
														0.414167	-0.00915			0.414167	-0.00971
														0.415	-0.00919			0.415	-0.00966
														0.415833	-0.00923			0.415833	-0.00967
														0.416667	-0.00925			0.416667	-0.00971
														0.4175	-0.00932			0.4175	-0.00979
														0.418333	-0.00938			0.418333	-0.00982
														0.419167	-0.00945			0.419167	-0.00988
														0.42	-0.00953			0.42	-0.00996
														0.420833	-0.00967			0.420833	-0.01004
														0.421667	-0.00975			0.421667	-0.01012
														0.4225	-0.00984			0.4225	-0.01022
														0.423333	-0.00997			0.423333	-0.01034
														0.424167	-0.01011			0.424167	-0.01045
														0.425	-0.01017			0.425	-0.01057
														0.425833	-0.01029			0.425833	-0.01069
														0.426667	-0.01039			0.426667	-0.0108
														0.4275	-0.01046			0.4275	-0.01086
														0.428333	-0.01051			0.428333	-0.01093
														0.429167	-0.0106			0.429167	-0.01095
														0.43	-0.01064			0.43	-0.01094
														0.430833	-0.01068			0.430833	-0.01092
														0.431667	-0.01072			0.431667	-0.01095
														0.4325	-0.01077			0.4325	-0.01094
														0.433333	-0.01077			0.433333	-0.01098
														0.434167	-0.01081			0.434167	-0.01103
														0.435	-0.01085			0.435	-0.0111
														0.435833	-0.01085			0.435833	-0.01111
														0.436667	-0.01084			0.436667	-0.01115
														0.4375	-0.01083			0.4375	-0.01113
														0.438333	-0.01077			0.438333	-0.01115
														0.439167	-0.0107			0.439167	-0.0111
														0.44	-0.01067			0.44	-0.01111
														0.440833	-0.01062			0.440833	-0.01107
														0.441667	-0.01061			0.441667	-0.01103
														0.4425	-0.01063			0.4425	-0.01098
														0.443333	-0.01065			0.443333	-0.01097
														0.444167	-0.01063			0.444167	-0.01091
														0.445	-0.01064			0.445	-0.0109
														0.445833	-0.01058			0.445833	-0.01089
														0.446667	-0.01049			0.446667	-0.01086
														0.4475	-0.0104			0.4475	-0.01082
														0.448333	-0.01034			0.448333	-0.01082
														0.449167	-0.01027			0.449167	-0.01079
														0.45	-0.01025			0.45	-0.01077
														0.450833	-0.01024			0.450833	-0.01075
														0.451667	-0.01023			0.451667	-0.01075
														0.4525	-0.01019			0.4525	-0.01068
														0.453333	-0.01017			0.453333	-0.01061
														0.454167	-0.01013			0.454167	-0.01053
														0.455	-0.01008			0.455	-0.01046
														0.455833	-0.01004			0.455833	-0.01036
														0.456667	-0.01001			0.456667	-0.01027
														0.4575	-0.00995			0.4575	-0.0102
														0.458333	-0.00989			0.458333	-0.01017
														0.459167	-0.00986			0.459167	-0.01011
														0.46	-0.00979			0.46	-0.01008
														0.460833	-0.00976			0.460833	-0.01009
														0.461667	-0.00974			0.461667	-0.01009
														0.4625	-0.00975			0.4625	-0.01003
														0.463333	-0.00973			0.463333	-0.01003
														0.464167	-0.00973			0.464167	-0.00999
														0.465	-0.00973			0.465	-0.00992
														0.465833	-0.00972			0.465833	-0.00988
														0.466667	-0.00969			0.466667	-0.00986
														0.4675	-0.00968			0.4675	-0.00981
														0.468333	-0.00966			0.468333	-0.00976
														0.469167	-0.00963			0.469167	-0.00977
														0.47	-0.00961			0.47	-0.00974
														0.470833	-0.00959			0.470833	-0.0097
														0.471667	-0.00954			0.471667	-0.0097
														0.4725	-0.00949			0.4725	-0.00971
														0.473333	-0.00945			0.473333	-0.00964
														0.474167	-0.00942			0.474167	-0.0096
														0.475	-0.00937			0.475	-0.00957
														0.475833	-0.00937			0.475833	-0.00953
														0.476667	-0.00935			0.476667	-0.00949
														0.4775	-0.00934			0.4775	-0.00949
														0.478333	-0.00932			0.478333	-0.00949
														0.479167	-0.00932			0.479167	-0.0095
														0.48	-0.00929			0.48	-0.00949
														0.480833	-0.00928			0.480833	-0.00949
														0.481667	-0.00929			0.481667	-0.00949
														0.4825	-0.00928			0.4825	-0.0095
														0.483333	-0.00927			0.483333	-0.0095
														0.484167	-0.00927			0.484167	-0.0095
														0.485	-0.00929			0.485	-0.00949
														0.485833	-0.00926			0.485833	-0.00948
														0.486667	-0.00926			0.486667	-0.00947
														0.4875	-0.00926			0.4875	-0.00946
														0.488333	-0.00923			0.488333	-0.00945
														0.489167	-0.00917			0.489167	-0.00944
														0.49	-0.00911			0.49	-0.0094
														0.490833	-0.00906			0.490833	-0.00933
														0.491667	-0.00901			0.491667	-0.00924
														0.4925	-0.00896			0.4925	-0.00917
														0.493333	-0.00896			0.493333	-0.00911
														0.494167	-0.00897			0.494167	-0.00905
														0.495	-0.00894			0.495	-0.00903
														0.495833	-0.00892			0.495833	-0.00904
														0.496667	-0.00892			0.496667	-0.00904
														0.4975	-0.0089			0.4975	-0.00903
														0.498333	-0.00886			0.498333	-0.00905
														0.499167	-0.00886			0.499167	-0.00904
														0.5	-0.00885			0.5	-0.00901
														0.500833	-0.00879			0.500833	-0.00898
														0.501667	-0.00874			0.501667	-0.00897
														0.5025	-0.0087			0.5025	-0.00894
														0.503333	-0.00866			0.503333	-0.00892
														0.504167	-0.0086			0.504167	-0.00893
														0.505	-0.0086			0.505	-0.00893
														0.505833	-0.00858			0.505833	-0.00893
														0.506667	-0.00856			0.506667	-0.00892
														0.5075	-0.00853			0.5075	-0.00892
														0.508333	-0.00855			0.508333	-0.00887
														0.509167	-0.00852			0.509167	-0.00884
														0.51	-0.00851			0.51	-0.00879
														0.510833	-0.00851			0.510833	-0.00876
														0.511667	-0.00851			0.511667	-0.00876
														0.5125	-0.00842			0.5125	-0.00874
														0.513333	-0.00838			0.513333	-0.00872
														0.514167	-0.00833			0.514167	-0.0087
														0.515	-0.00827			0.515	-0.00869
														0.515833	-0.00823			0.515833	-0.00862
														0.516667	-0.00826			0.516667	-0.00858
														0.5175	-0.00827			0.5175	-0.00856
														0.518333	-0.00826			0.518333	-0.00853
														0.519167	-0.00825			0.519167	-0.00848
														0.52	-0.00822			0.52	-0.00852
														0.520833	-0.00815			0.520833	-0.00851
														0.521667	-0.00812			0.521667	-0.0085
														0.5225	-0.00808			0.5225	-0.0085
														0.523333	-0.00804			0.523333	-0.00848
														0.524167	-0.00802			0.524167	-0.00842
														0.525	-0.00798			0.525	-0.00841
														0.525833	-0.00792			0.525833	-0.00838
														0.526667	-0.00788			0.526667	-0.00831
														0.5275	-0.00784			0.5275	-0.00828
														0.528333	-0.00779			0.528333	-0.00824
														0.529167	-0.00776			0.529167	-0.00815
														0.53	-0.00776			0.53	-0.00805
														0.530833	-0.00775			0.530833	-0.00798
														0.531667	-0.00773			0.531667	-0.0079
														0.5325	-0.0077			0.5325	-0.00786
														0.533333	-0.00768			0.533333	-0.00783
														0.534167	-0.00761			0.534167	-0.00785
														0.535	-0.00758			0.535	-0.00787
														0.535833	-0.00757			0.535833	-0.00788
														0.536667	-0.00759			0.536667	-0.00788
														0.5375	-0.00757			0.5375	-0.00789
														0.538333	-0.00762			0.538333	-0.00788
														0.539167	-0.00762			0.539167	-0.00786
														0.54	-0.00761			0.54	-0.00786
														0.540833	-0.00757			0.540833	-0.00783
														0.541667	-0.00759			0.541667	-0.00781
														0.5425	-0.00755			0.5425	-0.0078
														0.543333	-0.00757			0.543333	-0.00783
														0.544167	-0.00759			0.544167	-0.00785
														0.545	-0.00766			0.545	-0.0079
														0.545833	-0.00769			0.545833	-0.00794
														0.546667	-0.00776			0.546667	-0.008
														0.5475	-0.00783			0.5475	-0.00804
														0.548333	-0.00792			0.548333	-0.00809
														0.549167	-0.00799			0.549167	-0.00819
														0.55	-0.0081			0.55	-0.00827
														0.550833	-0.00824			0.550833	-0.00832
														0.551667	-0.00835			0.551667	-0.00842
														0.5525	-0.00845			0.5525	-0.00851
														0.553333	-0.00858			0.553333	-0.0086
														0.554167	-0.0087			0.554167	-0.00874
														0.555	-0.0088			0.555	-0.00893
														0.555833	-0.00895			0.555833	-0.0091
														0.556667	-0.00913			0.556667	-0.00928
														0.5575	-0.00932			0.5575	-0.00946
														0.558333	-0.00953			0.558333	-0.00965
														0.559167	-0.00979			0.559167	-0.0098
														0.56	-0.01004			0.56	-0.00999
														0.560833	-0.01027			0.560833	-0.01018
														0.561667	-0.01053			0.561667	-0.01038
														0.5625	-0.0108			0.5625	-0.01057
														0.563333	-0.01103			0.563333	-0.01081
														0.564167	-0.01127			0.564167	-0.01103
														0.565	-0.01154			0.565	-0.01127
														0.565833	-0.0118			0.565833	-0.01153
														0.566667	-0.01205			0.566667	-0.01179
														0.5675	-0.01233			0.5675	-0.01207
														0.568333	-0.01263			0.568333	-0.01234
														0.569167	-0.01294			0.569167	-0.01266
														0.57	-0.01322			0.57	-0.01297
														0.570833	-0.01352			0.570833	-0.0133
														0.571667	-0.01385			0.571667	-0.01361
														0.5725	-0.01414			0.5725	-0.01397
														0.573333	-0.01444			0.573333	-0.01429
														0.574167	-0.01479			0.574167	-0.01463
														0.575	-0.01513			0.575	-0.01499
														0.575833	-0.01546			0.575833	-0.01531
														0.576667	-0.01582			0.576667	-0.0156
														0.5775	-0.01612			0.5775	-0.0159
														0.578333	-0.01641			0.578333	-0.01616
														0.579167	-0.01674			0.579167	-0.01643
														0.58	-0.01703			0.58	-0.01671
														0.580833	-0.01731			0.580833	-0.01701
														0.581667	-0.01763			0.581667	-0.01733
														0.5825	-0.01796			0.5825	-0.01765
														0.583333	-0.01827			0.583333	-0.01796
														0.584167	-0.01857			0.584167	-0.01828
														0.585	-0.01885			0.585	-0.01856
														0.585833	-0.01912			0.585833	-0.01886
														0.586667	-0.0194			0.586667	-0.01917
														0.5875	-0.01968			0.5875	-0.01945
														0.588333	-0.01998			0.588333	-0.01974
														0.589167	-0.02029			0.589167	-0.02004
														0.59	-0.02062			0.59	-0.02029
														0.590833	-0.02087			0.590833	-0.02053
														0.591667	-0.02111			0.591667	-0.02081
														0.5925	-0.02133			0.5925	-0.02108
														0.593333	-0.02157			0.593333	-0.02136
														0.594167	-0.02179			0.594167	-0.02166
														0.595	-0.02204			0.595	-0.02196
														0.595833	-0.02235			0.595833	-0.02225
														0.596667	-0.02265			0.596667	-0.02252
														0.5975	-0.02294			0.5975	-0.02279
														0.598333	-0.02325			0.598333	-0.02301
														0.599167	-0.02357			0.599167	-0.02323
														0.6	-0.02383			0.6	-0.0234
														0.600833	-0.02408			0.600833	-0.02358
														0.601667	-0.0243			0.601667	-0.02373
														0.6025	-0.02449			0.6025	-0.0239
														0.603333	-0.02465			0.603333	-0.02407
														0.604167	-0.02484			0.604167	-0.02426
														0.605	-0.02499			0.605	-0.02446
														0.605833	-0.02519			0.605833	-0.02469
														0.606667	-0.02539			0.606667	-0.02491
														0.6075	-0.02556			0.6075	-0.02515
														0.608333	-0.02574			0.608333	-0.02536
														0.609167	-0.02595			0.609167	-0.02554
														0.61	-0.02611			0.61	-0.02572
														0.610833	-0.02628			0.610833	-0.0259
														0.611667	-0.02646			0.611667	-0.02606
														0.6125	-0.02665			0.6125	-0.02625
														0.613333	-0.02681			0.613333	-0.02647
														0.614167	-0.02702			0.614167	-0.02665
														0.615	-0.02721			0.615	-0.02683
														0.615833	-0.02737			0.615833	-0.02703
														0.616667	-0.0275			0.616667	-0.02718
														0.6175	-0.02764			0.6175	-0.02732
														0.618333	-0.02779			0.618333	-0.02745
														0.619167	-0.02791			0.619167	-0.02759
														0.62	-0.02809			0.62	-0.0277
														0.620833	-0.02828			0.620833	-0.02786
														0.621667	-0.02842			0.621667	-0.02801
														0.6225	-0.02855			0.6225	-0.02816
														0.623333	-0.0287			0.623333	-0.02831
														0.624167	-0.02879			0.624167	-0.02844
														0.625	-0.02888			0.625	-0.02855
														0.625833	-0.02899			0.625833	-0.02867
														0.626667	-0.02909			0.626667	-0.02877
														0.6275	-0.02917			0.6275	-0.02884
														0.628333	-0.02927			0.628333	-0.02896
														0.629167	-0.02936			0.629167	-0.02908
														0.63	-0.02947			0.63	-0.02917
														0.630833	-0.02956			0.630833	-0.02926
														0.631667	-0.02965			0.631667	-0.02938
														0.6325	-0.02972			0.6325	-0.02944
														0.633333	-0.02979			0.633333	-0.02948
														0.634167	-0.02982			0.634167	-0.02956
														0.635	-0.02988			0.635	-0.02962
														0.635833	-0.02992			0.635833	-0.02967
														0.636667	-0.02995			0.636667	-0.02971
														0.6375	-0.02999			0.6375	-0.02977
														0.638333	-0.03004			0.638333	-0.0298
														0.639167	-0.03008			0.639167	-0.02982
														0.64	-0.03013			0.64	-0.02986
														0.640833	-0.03018			0.640833	-0.02989
														0.641667	-0.03022			0.641667	-0.02993
														0.6425	-0.03023			0.6425	-0.02995
														0.643333	-0.0302			0.643333	-0.02995
														0.644167	-0.03018			0.644167	-0.02991
														0.645	-0.03016			0.645	-0.02989
														0.645833	-0.03012			0.645833	-0.02985
														0.646667	-0.03008			0.646667	-0.02983
														0.6475	-0.03011			0.6475	-0.02979
														0.648333	-0.03012			0.648333	-0.02982
														0.649167	-0.03012			0.649167	-0.02984
														0.65	-0.03015			0.65	-0.02984
														0.650833	-0.03015			0.650833	-0.02982
														0.651667	-0.03009			0.651667	-0.02984
														0.6525	-0.03			0.6525	-0.0298
														0.653333	-0.02991			0.653333	-0.02974
														0.654167	-0.02981			0.654167	-0.02968
														0.655	-0.02967			0.655	-0.02962
														0.655833	-0.02958			0.655833	-0.02951
														0.656667	-0.02952			0.656667	-0.0294
														0.6575	-0.02946			0.6575	-0.02929
														0.658333	-0.02937			0.658333	-0.0292
														0.659167	-0.02936			0.659167	-0.02912
														0.66	-0.02927			0.66	-0.02908
														0.660833	-0.02916			0.660833	-0.02905
														0.661667	-0.02902			0.661667	-0.02898
														0.6625	-0.02894			0.6625	-0.02891
														0.663333	-0.02882			0.663333	-0.02881
														0.664167	-0.02874			0.664167	-0.02867
														0.665	-0.02866			0.665	-0.02855
														0.665833	-0.02858			0.665833	-0.02844
														0.666667	-0.02848			0.666667	-0.0283
														0.6675	-0.02838			0.6675	-0.02823
														0.668333	-0.02827			0.668333	-0.02813
														0.669167	-0.02818			0.669167	-0.028
														0.67	-0.02806			0.67	-0.0279
														0.670833	-0.0279			0.670833	-0.0278
														0.671667	-0.02775			0.671667	-0.02765
														0.6725	-0.0276			0.6725	-0.02754
														0.673333	-0.02741			0.673333	-0.02741
														0.674167	-0.02724			0.674167	-0.02727
														0.675	-0.02708			0.675	-0.02708
														0.675833	-0.02691			0.675833	-0.0269
														0.676667	-0.02671			0.676667	-0.02667
														0.6775	-0.02652			0.6775	-0.02647
														0.678333	-0.02634			0.678333	-0.02627
														0.679167	-0.0262			0.679167	-0.02613
														0.68	-0.02603			0.68	-0.026
														0.680833	-0.02589			0.680833	-0.02588
														0.681667	-0.02574			0.681667	-0.02574
														0.6825	-0.02559			0.6825	-0.02559
														0.683333	-0.02536			0.683333	-0.02542
														0.684167	-0.02518			0.684167	-0.02522
														0.685	-0.02497			0.685	-0.02496
														0.685833	-0.02478			0.685833	-0.02475
														0.686667	-0.02459			0.686667	-0.02456
														0.6875	-0.02444			0.6875	-0.02434
														0.688333	-0.02424			0.688333	-0.02414
														0.689167	-0.02407			0.689167	-0.02401
														0.69	-0.02388			0.69	-0.02382
														0.690833	-0.02365			0.690833	-0.02362
														0.691667	-0.02342			0.691667	-0.02343
														0.6925	-0.0232			0.6925	-0.02324
														0.693333	-0.02294			0.693333	-0.02302
														0.694167	-0.02271			0.694167	-0.02283
														0.695	-0.02249			0.695	-0.02262
														0.695833	-0.02227			0.695833	-0.02243
														0.696667	-0.02203			0.696667	-0.02218
														0.6975	-0.02182			0.6975	-0.02195
														0.698333	-0.0216			0.698333	-0.02171
														0.699167	-0.02135			0.699167	-0.02146
														0.7	-0.0211			0.7	-0.02119
														0.700833	-0.02086			0.700833	-0.02095
														0.701667	-0.02065			0.701667	-0.02071
														0.7025	-0.02036			0.7025	-0.02047
														0.703333	-0.02014			0.703333	-0.02026
														0.704167	-0.01992			0.704167	-0.02006
														0.705	-0.01968			0.705	-0.01984
														0.705833	-0.01941			0.705833	-0.01961
														0.706667	-0.01923			0.706667	-0.01935
														0.7075	-0.01896			0.7075	-0.01908
														0.708333	-0.01871			0.708333	-0.01881
														0.709167	-0.01851			0.709167	-0.01858
														0.71	-0.0183			0.71	-0.01836
														0.710833	-0.01804			0.710833	-0.01818
														0.711667	-0.01786			0.711667	-0.018
														0.7125	-0.01764			0.7125	-0.01784
														0.713333	-0.01738			0.713333	-0.01765
														0.714167	-0.01714			0.714167	-0.01749
														0.715	-0.01689			0.715	-0.01731
														0.715833	-0.01661			0.715833	-0.0171
														0.716667	-0.01636			0.716667	-0.01683
														0.7175	-0.0161			0.7175	-0.01655
														0.718333	-0.01584			0.718333	-0.01625
														0.719167	-0.0156			0.719167	-0.01595
														0.72	-0.01536			0.72	-0.01568
														0.720833	-0.01511			0.720833	-0.01548
														0.721667	-0.01489			0.721667	-0.01528
														0.7225	-0.01465			0.7225	-0.01505
														0.723333	-0.01442			0.723333	-0.01481
														0.724167	-0.01417			0.724167	-0.01456
														0.725	-0.01395			0.725	-0.01426
														0.725833	-0.01366			0.725833	-0.01399
														0.726667	-0.01339			0.726667	-0.01375
														0.7275	-0.01315			0.7275	-0.01353
														0.728333	-0.01291			0.728333	-0.01333
														0.729167	-0.01268			0.729167	-0.01315
														0.73	-0.01248			0.73	-0.01294
														0.730833	-0.01227			0.730833	-0.01273
														0.731667	-0.01204			0.731667	-0.01246
														0.7325	-0.01182			0.7325	-0.01217
														0.733333	-0.01157			0.733333	-0.01188
														0.734167	-0.01135			0.734167	-0.01162
														0.735	-0.01113			0.735	-0.01137
														0.735833	-0.01092			0.735833	-0.01119
														0.736667	-0.01068			0.736667	-0.01101
														0.7375	-0.01047			0.7375	-0.01081
														0.738333	-0.01023			0.738333	-0.01062
														0.739167	-0.01001			0.739167	-0.01042
														0.74	-0.00979			0.74	-0.01016
														0.740833	-0.00963			0.740833	-0.00995
														0.741667	-0.00939			0.741667	-0.00972
														0.7425	-0.00914			0.7425	-0.00947
														0.743333	-0.0089			0.743333	-0.00924
														0.744167	-0.00864			0.744167	-0.00902
														0.745	-0.00834			0.745	-0.00883
														0.745833	-0.00809			0.745833	-0.00866
														0.746667	-0.00789			0.746667	-0.0085
														0.7475	-0.00765			0.7475	-0.00831
														0.748333	-0.00741			0.748333	-0.00813
														0.749167	-0.00722			0.749167	-0.00788
														0.75	-0.00702			0.75	-0.00761
														0.750833	-0.00677			0.750833	-0.00734
														0.751667	-0.00659			0.751667	-0.00713
														0.7525	-0.00642			0.7525	-0.00689
														0.753333	-0.00619			0.753333	-0.00668
														0.754167	-0.00597			0.754167	-0.0065
														0.755	-0.00579			0.755	-0.00629
														0.755833	-0.00555			0.755833	-0.00606
														0.756667	-0.0053			0.756667	-0.00587
														0.7575	-0.00511			0.7575	-0.00563
														0.758333	-0.0049			0.758333	-0.00542
														0.759167	-0.00468			0.759167	-0.00527
														0.76	-0.00452			0.76	-0.0051
														0.760833	-0.00436			0.760833	-0.00493
														0.761667	-0.00416			0.761667	-0.0048
														0.7625	-0.004			0.7625	-0.00464
														0.763333	-0.00381			0.763333	-0.00441
														0.764167	-0.00362			0.764167	-0.00421
														0.765	-0.00342			0.765	-0.00403
														0.765833	-0.00324			0.765833	-0.00381
														0.766667	-0.00302			0.766667	-0.0036
														0.7675	-0.00285			0.7675	-0.00345
														0.768333	-0.00267			0.768333	-0.00327
														0.769167	-0.00252			0.769167	-0.00305
														0.77	-0.00237			0.77	-0.00286
														0.770833	-0.00223			0.770833	-0.0027
														0.771667	-0.00207			0.771667	-0.00248
														0.7725	-0.0019			0.7725	-0.0023
														0.773333	-0.00166			0.773333	-0.00216
														0.774167	-0.00144			0.774167	-0.00202
														0.775	-0.00122			0.775	-0.00188
														0.775833	-0.00101			0.775833	-0.00179
														0.776667	-0.00081			0.776667	-0.00167
														0.7775	-0.00069			0.7775	-0.00153
														0.778333	-0.00052			0.778333	-0.00135
														0.779167	-0.00036			0.779167	-0.00113
														0.78	-0.00021			0.78	-0.00088
														0.780833	-8.08e-05			0.780833	-0.00066
														0.781667	9.35e-05			0.781667	-0.00047
														0.7825	0.000231			0.7825	-0.00032
														0.783333	0.000372			0.783333	-0.00024
														0.784167	0.000522			0.784167	-0.00015
														0.785	0.000732			0.785	-1.96e-05
														0.785833	0.000933			0.785833	0.000123
														0.786667	0.0011			0.786667	0.000284
														0.7875	0.001263			0.7875	0.000504
														0.788333	0.001441			0.788333	0.000712
														0.789167	0.001541			0.789167	0.000876
														0.79	0.001644			0.79	0.001024
														0.790833	0.001789			0.790833	0.001172
														0.791667	0.001948			0.791667	0.001286
														0.7925	0.002077			0.7925	0.001417
														0.793333	0.002258			0.793333	0.001545
														0.794167	0.002418			0.794167	0.001701
														0.795	0.002559			0.795	0.001854
														0.795833	0.002695			0.795833	0.002009
														0.796667	0.002849			0.796667	0.002137
														0.7975	0.002963			0.7975	0.002298
														0.798333	0.003059			0.798333	0.002439
														0.799167	0.003208			0.799167	0.002575
														0.8	0.003337			0.8	0.002695
														0.800833	0.003465			0.800833	0.002845
														0.801667	0.003614			0.801667	0.002957
														0.8025	0.003809			0.8025	0.003061
														0.803333	0.003928			0.803333	0.003178
														0.804167	0.004057			0.804167	0.003301
														0.805	0.004181			0.805	0.003386
														0.805833	0.00429			0.805833	0.00349
														0.806667	0.004356			0.806667	0.003598
														0.8075	0.004456			0.8075	0.003699
														0.808333	0.004574			0.808333	0.003799
														0.809167	0.004686			0.809167	0.003951
														0.81	0.004815			0.81	0.004098
														0.810833	0.004964			0.810833	0.004224
														0.811667	0.005117			0.811667	0.004369
														0.8125	0.005227			0.8125	0.004518
														0.813333	0.005371			0.813333	0.004622
														0.814167	0.005491			0.814167	0.00472
														0.815	0.005629			0.815	0.004836
														0.815833	0.005728			0.815833	0.004931
														0.816667	0.005861			0.816667	0.005025
														0.8175	0.005947			0.8175	0.005111
														0.818333	0.006047			0.818333	0.005205
														0.819167	0.006105			0.819167	0.005332
														0.82	0.006237			0.82	0.005473
														0.820833	0.006347			0.820833	0.005612
														0.821667	0.006472			0.821667	0.00579
														0.8225	0.006585			0.8225	0.005962
														0.823333	0.006738			0.823333	0.006085
														0.824167	0.006825			0.824167	0.006177
														0.825	0.006931			0.825	0.006314
														0.825833	0.007043			0.825833	0.006378
														0.826667	0.007166			0.826667	0.006469
														0.8275	0.007261			0.8275	0.006552
														0.828333	0.007364			0.828333	0.006649
														0.829167	0.007455			0.829167	0.006693
														0.83	0.007538			0.83	0.006831
														0.830833	0.007642			0.830833	0.006923
														0.831667	0.007756			0.831667	0.007055
														0.8325	0.007876			0.8325	0.007184
														0.833333	0.007996			0.833333	0.007324
														0.834167	0.00812			0.834167	0.007407
														0.835	0.008206			0.835	0.007499
														0.835833	0.008299			0.835833	0.007579
														0.836667	0.008415			0.836667	0.007665
														0.8375	0.008498			0.8375	0.007719
														0.838333	0.008581			0.838333	0.007778
														0.839167	0.008664			0.839167	0.007886
														0.84	0.008737			0.84	0.007985
														0.840833	0.008781			0.840833	0.008086
														0.841667	0.008853			0.841667	0.008212
														0.8425	0.008938			0.8425	0.008338
														0.843333	0.009047			0.843333	0.008386
														0.844167	0.009135			0.844167	0.008427
														0.845	0.009238			0.845	0.008462
														0.845833	0.009357			0.845833	0.008501
														0.846667	0.009463			0.846667	0.008554
														0.8475	0.009534			0.8475	0.008647
														0.848333	0.009647			0.848333	0.008751
														0.849167	0.009735			0.849167	0.008855
														0.85	0.009805			0.85	0.008956
														0.850833	0.009861			0.850833	0.009053
														0.851667	0.00996			0.851667	0.00915
														0.8525	0.010046			0.8525	0.009237
														0.853333	0.010143			0.853333	0.00934
														0.854167	0.010247			0.854167	0.00944
														0.855	0.010385			0.855	0.009555
														0.855833	0.0105			0.855833	0.009648
														0.856667	0.010577			0.856667	0.009768
														0.8575	0.010675			0.8575	0.009849
														0.858333	0.010755			0.858333	0.009942
														0.859167	0.010819			0.859167	0.010013
														0.86	0.01088			0.86	0.010128
														0.860833	0.011001			0.860833	0.010219
														0.861667	0.0111			0.861667	0.010372
														0.8625	0.011248			0.8625	0.010527
														0.863333	0.011356			0.863333	0.01067
														0.864167	0.011474			0.864167	0.010779
														0.865	0.011553			0.865	0.01088
														0.865833	0.011634			0.865833	0.010911
														0.866667	0.011646			0.866667	0.010921
														0.8675	0.011735			0.8675	0.010929
														0.868333	0.011833			0.868333	0.010937
														0.869167	0.011904			0.869167	0.010969
														0.87	0.011982			0.87	0.01103
														0.870833	0.012119			0.870833	0.011076
														0.871667	0.012172			0.871667	0.011166
														0.8725	0.012183			0.8725	0.011247
														0.873333	0.012223			0.873333	0.011304
														0.874167	0.012279			0.874167	0.011394
														0.875	0.012281			0.875	0.011511
														0.875833	0.012336			0.875833	0.011595
														0.876667	0.012433			0.876667	0.011706
														0.8775	0.012582			0.8775	0.011831
														0.878333	0.012681			0.878333	0.011919
														0.879167	0.01281			0.879167	0.011999
														0.88	0.012925			0.88	0.012071
														0.880833	0.01303			0.880833	0.012137
														0.881667	0.013067			0.881667	0.012184
														0.8825	0.013118			0.8825	0.012236
														0.883333	0.013182			0.883333	0.012302
														0.884167	0.013238			0.884167	0.012414
														0.885	0.013265			0.885	0.01251
														0.885833	0.013311			0.885833	0.012619
														0.886667	0.013418			0.886667	0.012714
														0.8875	0.013492			0.8875	0.012795
														0.888333	0.0136			0.888333	0.012832
														0.889167	0.013726			0.889167	0.012863
														0.89	0.013886			0.89	0.012886
														0.890833	0.013956			0.890833	0.012948
														0.891667	0.014033			0.891667	0.012995
														0.8925	0.014095			0.8925	0.013056
														0.893333	0.014175			0.893333	0.01313
														0.894167	0.014183			0.894167	0.013253
														0.895	0.014246			0.895	0.013351
														0.895833	0.014337			0.895833	0.013446
														0.896667	0.014386			0.896667	0.013549
														0.8975	0.014429			0.8975	0.013643
														0.898333	0.014508			0.898333	0.013686
														0.899167	0.014576			0.899167	0.013697
														0.9	0.014597			0.9	0.013753
														0.900833	0.01467			0.900833	0.013813
														0.901667	0.014729			0.901667	0.013877
														0.9025	0.014814			0.9025	0.013935
														0.903333	0.014889			0.903333	0.01406
														0.904167	0.015001			0.904167	0.014147
														0.905	0.015086			0.905	0.014202
														0.905833	0.015179			0.905833	0.014268
														0.906667	0.015242			0.906667	0.014358
														0.9075	0.015281			0.9075	0.014384
														0.908333	0.01533			0.908333	0.014403
														0.909167	0.015343			0.909167	0.014448
														0.91	0.015364			0.91	0.01446
														0.910833	0.01539			0.910833	0.014474
														0.911667	0.015469			0.911667	0.014524
														0.9125	0.0155			0.9125	0.014572
														0.913333	0.015601			0.913333	0.014643
														0.914167	0.015663			0.914167	0.014736
														0.915	0.015735			0.915	0.014835
														0.915833	0.01578			0.915833	0.014909
														0.916667	0.015865			0.916667	0.015028
														0.9175	0.015907			0.9175	0.015087
														0.918333	0.015993			0.918333	0.015162
														0.919167	0.016068			0.919167	0.015204
														0.92	0.016152			0.92	0.015266
														0.920833	0.016203			0.920833	0.015289
														0.921667	0.016281			0.921667	0.015338
														0.9225	0.016359			0.9225	0.015346
														0.923333	0.016395			0.923333	0.015366
														0.924167	0.016433			0.924167	0.015401
														0.925	0.01651			0.925	0.015458
														0.925833	0.016562			0.925833	0.015505
														0.926667	0.016576			0.926667	0.015593
														0.9275	0.016649			0.9275	0.015659
														0.928333	0.016718			0.928333	0.015698
														0.929167	0.016747			0.929167	0.015717
														0.93	0.0168			0.93	0.015766
														0.930833	0.016857			0.930833	0.015807
														0.931667	0.016927			0.931667	0.015881
														0.9325	0.016959			0.9325	0.015977
														0.933333	0.016984			0.933333	0.016099
														0.934167	0.016994			0.934167	0.016208
														0.935	0.017039			0.935	0.016303
														0.935833	0.01704			0.935833	0.016385
														0.936667	0.017085			0.936667	0.016428
														0.9375	0.017167			0.9375	0.016441
														0.938333	0.017236			0.938333	0.016441
														0.939167	0.017272			0.939167	0.016419
														0.94	0.017302			0.94	0.016388
														0.940833	0.017317			0.940833	0.016405
														0.941667	0.017335			0.941667	0.016406
														0.9425	0.017384			0.9425	0.016413
														0.943333	0.017473			0.943333	0.016464
														0.944167	0.017606			0.944167	0.016548
														0.945	0.017718			0.945	0.01661
														0.945833	0.017805			0.945833	0.016684
														0.946667	0.017845			0.946667	0.016751
														0.9475	0.017863			0.9475	0.016811
														0.948333	0.017864			0.948333	0.016813
														0.949167	0.017904			0.949167	0.016813
														0.95	0.017948			0.95	0.016827
														0.950833	0.018007			0.950833	0.016867
														0.951667	0.018058			0.951667	0.016887
														0.9525	0.018078			0.9525	0.016948
														0.953333	0.01806			0.953333	0.017001
														0.954167	0.01805			0.954167	0.017069
														0.955	0.018044			0.955	0.017105
														0.955833	0.018031			0.955833	0.017168
														0.956667	0.018025			0.956667	0.0172
														0.9575	0.018067			0.9575	0.017229
														0.958333	0.0181			0.958333	0.017255
														0.959167	0.018164			0.959167	0.017291
														0.96	0.018253			0.96	0.017296
														0.960833	0.018348			0.960833	0.017341
														0.961667	0.018419			0.961667	0.017422
														0.9625	0.018493			0.9625	0.017476
														0.963333	0.018539			0.963333	0.017519
														0.964167	0.018546			0.964167	0.017585
														0.965	0.018574			0.965	0.017613
														0.965833	0.018585			0.965833	0.017617
														0.966667	0.018583			0.966667	0.017623
														0.9675	0.01856			0.9675	0.017653
														0.968333	0.01857			0.968333	0.01766
														0.969167	0.018568			0.969167	0.017709
														0.97	0.018564			0.97	0.017728
														0.970833	0.018591			0.970833	0.017748
														0.971667	0.018663			0.971667	0.017772
														0.9725	0.018734			0.9725	0.01781
														0.973333	0.018797			0.973333	0.017794
														0.974167	0.018858			0.974167	0.017814
														0.975	0.018899			0.975	0.017847
														0.975833	0.01891			0.975833	0.017876
														0.976667	0.018906			0.976667	0.017899
														0.9775	0.018893			0.9775	0.017991
														0.978333	0.018921			0.978333	0.018079
														0.979167	0.018918			0.979167	0.018147
														0.98	0.018897			0.98	0.018194
														0.980833	0.018929			0.980833	0.018249
														0.981667	0.018952			0.981667	0.01825
														0.9825	0.018941			0.9825	0.018265
														0.983333	0.019004			0.983333	0.018277
														0.984167	0.019097			0.984167	0.018284
														0.985	0.019112			0.985	0.018273
														0.985833	0.019165			0.985833	0.018252
														0.986667	0.019205			0.986667	0.018217
														0.9875	0.019191			0.9875	0.0182
														0.988333	0.01916			0.988333	0.018196
														0.989167	0.01917			0.989167	0.018215
														0.99	0.019179			0.99	0.018273
														0.990833	0.019209			0.990833	0.018299
														0.991667	0.019273			0.991667	0.018345
														0.9925	0.019348			0.9925	0.018375
														0.993333	0.019431			0.993333	0.018395
														0.994167	0.019477			0.994167	0.018395
														0.995	0.019537			0.995	0.018434
														0.995833	0.019542			0.995833	0.018438
														0.996667	0.019565			0.996667	0.018466
														0.9975	0.019543			0.9975	0.018495
														0.998333	0.019538			0.998333	0.01851
														0.999167	0.019506			0.999167	0.018506
														1	0.019516			1	0.018504
														1.00083	0.019503			1.00083	0.018491
														1.00167	0.019502			1.00167	0.01848
														1.0025	0.019536			1.0025	0.01848
														1.00333	0.019542			1.00333	0.018503
														1.00417	0.019534			1.00417	0.018529
														1.005	0.019508			1.005	0.018589
														1.00583	0.019511			1.00583	0.018613
														1.00667	0.01949			1.00667	0.018639
														1.0075	0.019523			1.0075	0.018642
														1.00833	0.019557			1.00833	0.018649
														1.00917	0.019648			1.00917	0.018613
														1.01	0.019695			1.01	0.018596
														1.01083	0.019694			1.01083	0.018576
														1.01167	0.019668			1.01167	0.018569
														1.0125	0.019648			1.0125	0.018575
														1.01333	0.019563			1.01333	0.018578
														1.01417	0.019547			1.01417	0.018591
														1.015	0.01957			1.015	0.018606
														1.01583	0.019629			1.01583	0.018604
														1.01667	0.019686			1.01667	0.018579
														1.0175	0.01976			1.0175	0.018575
														1.01833	0.019786			1.01833	0.018588
														1.01917	0.019805			1.01917	0.018627
														1.02	0.019756			1.02	0.018672
														1.02083	0.019702			1.02083	0.018736
														1.02167	0.019665			1.02167	0.018778
														1.0225	0.019631			1.0225	0.018798
														1.02333	0.019635			1.02333	0.018766
														1.02417	0.0197			1.02417	0.018758
														1.025	0.019771			1.025	0.0187
														1.02583	0.019829			1.02583	0.018647
														1.02667	0.019878			1.02667	0.018624
														1.0275	0.019883			1.0275	0.01863
														1.02833	0.01984			1.02833	0.018619
														1.02917	0.019783			1.02917	0.018664
														1.03	0.019744			1.03	0.018753
														1.03083	0.019728			1.03083	0.018817
														1.03167	0.019712			1.03167	0.01888
														1.0325	0.019753			1.0325	0.018909
														1.03333	0.01982			1.03333	0.01893
														1.03417	0.019848			1.03417	0.018893
														1.035	0.019861			1.035	0.018837
														1.03583	0.019868			1.03583	0.018766
														1.03667	0.019833			1.03667	0.018709
														1.0375	0.019751			1.0375	0.018631
														1.03833	0.019707			1.03833	0.018596
														1.03917	0.019682			1.03917	0.01856
														1.04	0.0197			1.04	0.018543
														1.04083	0.019696			1.04083	0.018549
														1.04167	0.019727			1.04167	0.018597
														1.0425	0.019729			1.0425	0.01862
														1.04333	0.019728			1.04333	0.01867
														1.04417	0.019685			1.04417	0.018732
														1.045	0.01969			1.045	0.018776
														1.04583	0.019678			1.04583	0.01879
														1.04667	0.019676			1.04667	0.018796
														1.0475	0.019648			1.0475	0.018814
														1.04833	0.019631			1.04833	0.018773
														1.04917	0.019592			1.04917	0.018755
														1.05	0.01957			1.05	0.018725
														1.05083	0.019566			1.05083	0.018705
														1.05167	0.019566			1.05167	0.018638
														1.0525	0.019554			1.0525	0.018629
														1.05333	0.019547			1.05333	0.018601
														1.05417	0.019528			1.05417	0.018574
														1.055	0.01949			1.055	0.018557
														1.05583	0.019501			1.05583	0.018581
														1.05667	0.019534			1.05667	0.018578
														1.0575	0.019599			1.0575	0.018604
														1.05833	0.019681			1.05833	0.018627
														1.05917	0.019753			1.05917	0.018637
														1.06	0.019757			1.06	0.018619
														1.06083	0.019768			1.06083	0.018628
														1.06167	0.019722			1.06167	0.018579
														1.0625	0.019642			1.0625	0.018549
														1.06333	0.019597			1.06333	0.01854
														1.06417	0.019581			1.06417	0.018532
														1.065	0.019546			1.065	0.018486
														1.06583	0.019539			1.06583	0.018475
														1.06667	0.019567			1.06667	0.018456
														1.0675	0.019588			1.0675	0.018397
														1.06833	0.019582			1.06833	0.018385
														1.06917	0.019572			1.06917	0.018375
														1.07	0.019555			1.07	0.018404
														1.07083	0.019501			1.07083	0.01842
														1.07167	0.019435			1.07167	0.018466
														1.0725	0.019432			1.0725	0.018483
														1.07333	0.019435			1.07333	0.018522
														1.07417	0.019432			1.07417	0.018514
														1.075	0.019474			1.075	0.018533
														1.07583	0.01948			1.07583	0.018555
														1.07667	0.019426			1.07667	0.018559
														1.0775	0.019382			1.0775	0.018542
														1.07833	0.019353			1.07833	0.018536
														1.07917	0.019272			1.07917	0.018514
														1.08	0.019237			1.08	0.01846
														1.08083	0.019227			1.08083	0.018423
														1.08167	0.019207			1.08167	0.018414
														1.0825	0.019187			1.0825	0.018384
														1.08333	0.019225			1.08333	0.018335
														1.08417	0.019254			1.08417	0.018316
														1.085	0.01926			1.085	0.018272
														1.08583	0.019274			1.08583	0.018215
														1.08667	0.019279			1.08667	0.018179
														1.0875	0.019247			1.0875	0.018171
														1.08833	0.019213			1.08833	0.018167
														1.08917	0.019214			1.08917	0.018175
														1.09	0.019223			1.09	0.018204
														1.09083	0.019209			1.09083	0.018226
														1.09167	0.019185			1.09167	0.018241
														1.0925	0.019151			1.0925	0.018244
														1.09333	0.019099			1.09333	0.01825
														1.09417	0.019031			1.09417	0.018198
														1.095	0.019			1.095	0.018152
														1.09583	0.018977			1.09583	0.018088
														1.09667	0.018986			1.09667	0.017996
														1.0975	0.019005			1.0975	0.017897
														1.09833	0.019002			1.09833	0.017852
														1.09917	0.019047			1.09917	0.017778
														1.1	0.019086			1.1	0.017737
														1.10083	0.019087			1.10083	0.017756
														1.10167	0.019072			1.10167	0.017751
														1.1025	0.01906			1.1025	0.017742
														1.10333	0.018954			1.10333	0.017784
														1.10417	0.018881			1.10417	0.017788
														1.105	0.018826			1.105	0.01775
														1.10583	0.018786			1.10583	0.017782
														1.10667	0.01878			1.10667	0.017765
														1.1075	0.018779			1.1075	0.017739
														1.10833	0.018758			1.10833	0.017748
														1.10917	0.018725			1.10917	0.017761
														1.11	0.01869			1.11	0.017716
														1.11083	0.018638			1.11083	0.017724
														1.11167	0.018646			1.11167	0.01768
														1.1125	0.018651			1.1125	0.017615
														1.11333	0.018677			1.11333	0.017555
														1.11417	0.018694			1.11417	0.017486
														1.115	0.018719			1.115	0.017418
														1.11583	0.018673			1.11583	0.017423
														1.11667	0.018627			1.11667	0.017426
														1.1175	0.018581			1.1175	0.017444
														1.11833	0.018502			1.11833	0.017525
														1.11917	0.018422			1.11917	0.017552
														1.12	0.018405			1.12	0.017517
														1.12083	0.018392			1.12083	0.0175
														1.12167	0.018375			1.12167	0.017469
														1.1225	0.018415			1.1225	0.017402
														1.12333	0.018426			1.12333	0.017389
														1.12417	0.018413			1.12417	0.017418
														1.125	0.018395			1.125	0.017418
														1.12583	0.018342			1.12583	0.017426
														1.12667	0.018266			1.12667	0.01743
														1.1275	0.018235			1.1275	0.017404
														1.12833	0.018206			1.12833	0.017351
														1.12917	0.018198			1.12917	0.01732
														1.13	0.018216			1.13	0.017244
														1.13083	0.018223			1.13083	0.017176
														1.13167	0.018215			1.13167	0.017111
														1.1325	0.018184			1.1325	0.017042
														1.13333	0.018125			1.13333	0.016976
														1.13417	0.018074			1.13417	0.01696
														1.135	0.01805			1.135	0.016928
														1.13583	0.018009			1.13583	0.016904
														1.13667	0.017987			1.13667	0.016903
														1.1375	0.017995			1.1375	0.016868
														1.13833	0.017983			1.13833	0.016798
														1.13917	0.017963			1.13917	0.016729
														1.14	0.017934			1.14	0.016682
														1.14083	0.017923			1.14083	0.016628
														1.14167	0.01786			1.14167	0.016597
														1.1425	0.017816			1.1425	0.016577
														1.14333	0.017743			1.14333	0.01658
														1.14417	0.01772			1.14417	0.016544
														1.145	0.017654			1.145	0.016485
														1.14583	0.017634			1.14583	0.016472
														1.14667	0.017605			1.14667	0.016483
														1.1475	0.017578			1.1475	0.016493
														1.14833	0.01752			1.14833	0.016498
														1.14917	0.01751			1.14917	0.016522
														1.15	0.01749			1.15	0.016494
														1.15083	0.017456			1.15083	0.016438
														1.15167	0.017467			1.15167	0.016377
														1.1525	0.017479			1.1525	0.016375
														1.15333	0.017471			1.15333	0.01637
														1.15417	0.017448			1.15417	0.016352
														1.155	0.01746			1.155	0.016363
														1.15583	0.017431			1.15583	0.016346
														1.15667	0.017399			1.15667	0.016282
														1.1575	0.017352			1.1575	0.016221
														1.15833	0.017309			1.15833	0.016186
														1.15917	0.017246			1.15917	0.016137
														1.16	0.017217			1.16	0.016131
														1.16083	0.01719			1.16083	0.016124
														1.16167	0.017181			1.16167	0.016115
														1.1625	0.017221			1.1625	0.016113
														1.16333	0.01726			1.16333	0.016065
														1.16417	0.017242			1.16417	0.015981
														1.165	0.017204			1.165	0.015901
														1.16583	0.01716			1.16583	0.015822
														1.16667	0.017068			1.16667	0.01573
														1.1675	0.016976			1.1675	0.015683
														1.16833	0.016946			1.16833	0.015671
														1.16917	0.016947			1.16917	0.015662
														1.17	0.016956			1.17	0.015656
														1.17083	0.01696			1.17083	0.015631
														1.17167	0.016946			1.17167	0.015614
														1.1725	0.016888			1.1725	0.0156
														1.17333	0.016808			1.17333	0.015591
														1.17417	0.016723			1.17417	0.015577
														1.175	0.01665			1.175	0.015637
														1.17583	0.016601			1.17583	0.015647
														1.17667	0.016571			1.17667	0.015614
														1.1775	0.016561			1.1775	0.015587
														1.17833	0.016552			1.17833	0.01555
														1.17917	0.016554			1.17917	0.0154
														1.18	0.016559			1.18	0.015329
														1.18083	0.016574			1.18083	0.015278
														1.18167	0.016594			1.18167	0.015199
														1.1825	0.016585			1.1825	0.015095
														1.18333	0.016556			1.18333	0.015114
														1.18417	0.016521			1.18417	0.01508
														1.185	0.016463			1.185	0.01506
														1.18583	0.016384			1.18583	0.015065
														1.18667	0.016346			1.18667	0.015123
														1.1875	0.016332			1.1875	0.015095
														1.18833	0.016292			1.18833	0.01508
														1.18917	0.016274			1.18917	0.015043
														1.19	0.016277			1.19	0.015001
														1.19083	0.016244			1.19083	0.014937
														1.19167	0.01619			1.19167	0.014918
														1.1925	0.016185			1.1925	0.014904
														1.19333	0.016177			1.19333	0.014899
														1.19417	0.016129			1.19417	0.0149
														1.195	0.016125			1.195	0.014933
														1.19583	0.016128			1.19583	0.014912
														1.19667	0.016099			1.19667	0.014898
														1.1975	0.016032			1.1975	0.014903
														1.19833	0.016026			1.19833	0.0149
														1.19917	0.016			1.19917	0.01482
														1.2	0.015964			1.2	0.014778
														1.20083	0.01592			1.20083	0.01472
														1.20167	0.015934			1.20167	0.014629
														1.2025	0.015891			1.2025	0.01455
														1.20333	0.015839			1.20333	0.014531
														1.20417	0.015812			1.20417	0.014512
														1.205	0.015786			1.205	0.014473
														1.20583	0.015723			1.20583	0.014453
														1.20667	0.015707			1.20667	0.014434
														1.2075	0.015682			1.2075	0.014379
														1.20833	0.015643			1.20833	0.014351
														1.20917	0.015626			1.20917	0.014332
														1.21	0.015622			1.21	0.014328
														1.21083	0.015598			1.21083	0.014269
														1.21167	0.015601			1.21167	0.014276
														1.2125	0.0156			1.2125	0.014223
														1.21333	0.015565			1.21333	0.014211
														1.21417	0.015544			1.21417	0.01414
														1.215	0.015529			1.215	0.014149
														1.21583	0.015469			1.21583	0.0141
														1.21667	0.015413			1.21667	0.014084
														1.2175	0.015421			1.2175	0.014048
														1.21833	0.015389			1.21833	0.014076
														1.21917	0.015308			1.21917	0.014064
														1.22	0.015288			1.22	0.014056
														1.22083	0.015279			1.22083	0.014051
														1.22167	0.015225			1.22167	0.014012
														1.2225	0.015196			1.2225	0.013956
														1.22333	0.015249			1.22333	0.013904
														1.22417	0.015281			1.22417	0.01387
														1.225	0.015287			1.225	0.013832
														1.22583	0.015293			1.22583	0.013842
														1.22667	0.015296			1.22667	0.013837
														1.2275	0.015227			1.2275	0.013812
														1.22833	0.01516			1.22833	0.013779
														1.22917	0.015113			1.22917	0.013755
														1.23	0.015068			1.23	0.013713
														1.23083	0.015035			1.23083	0.013668
														1.23167	0.015022			1.23167	0.013662
														1.2325	0.014983			1.2325	0.013653
														1.23333	0.014936			1.23333	0.013636
														1.23417	0.014891			1.23417	0.013596
														1.235	0.014819			1.235	0.013597
														1.23583	0.014769			1.23583	0.013564
														1.23667	0.01476			1.23667	0.013548
														1.2375	0.014768			1.2375	0.013546
														1.23833	0.014784			1.23833	0.013554
														1.23917	0.014834			1.23917	0.013509
														1.24	0.014867			1.24	0.013491
														1.24083	0.014854			1.24083	0.013437
														1.24167	0.014821			1.24167	0.013362
														1.2425	0.014806			1.2425	0.013335
														1.24333	0.014778			1.24333	0.013349
														1.24417	0.014747			1.24417	0.013336
														1.245	0.014758			1.245	0.013361
														1.24583	0.014766			1.24583	0.013386
														1.24667	0.014718			1.24667	0.013326
														1.2475	0.014658			1.2475	0.013263
														1.24833	0.01461			1.24833	0.013248
														1.24917	0.014512			1.24917	0.013181
														1.25	0.01443			1.25	0.013142
														1.25083	0.014379			1.25083	0.013163
														1.25167	0.014356			1.25167	0.013158
														1.2525	0.014318			1.2525	0.013113
														1.25333	0.014333			1.25333	0.013114
														1.25417	0.014336			1.25417	0.01309
														1.255	0.014344			1.255	0.013063
														1.25583	0.014309			1.25583	0.013019
														1.25667	0.014297			1.25667	0.012985
														1.2575	0.014236			1.2575	0.01295
														1.25833	0.01418			1.25833	0.012906
														1.25917	0.014107			1.25917	0.012863
														1.26	0.01407			1.26	0.012853
														1.26083	0.014022			1.26083	0.012859
														1.26167	0.014039			1.26167	0.012846
														1.2625	0.014065			1.2625	0.012862
														1.26333	0.0141			1.26333	0.012837
														1.26417	0.014135			1.26417	0.012832
														1.265	0.014157			1.265	0.012806
														1.26583	0.014133			1.26583	0.012775
														1.26667	0.01408			1.26667	0.012719
														1.2675	0.014049			1.2675	0.01271
														1.26833	0.014022			1.26833	0.012659
														1.26917	0.014015			1.26917	0.012626
														1.27	0.014014			1.27	0.012634
														1.27083	0.014049			1.27083	0.012656
														1.27167	0.014063			1.27167	0.012646
														1.2725	0.014005			1.2725	0.012683
														1.27333	0.013947			1.27333	0.012675
														1.27417	0.01388			1.27417	0.012622
														1.275	0.013816			1.275	0.012573
														1.27583	0.013756			1.27583	0.012536
														1.27667	0.013792			1.27667	0.012441
														1.2775	0.01378			1.2775	0.012407
														1.27833	0.01379			1.27833	0.012408
														1.27917	0.01377			1.27917	0.012399
														1.28	0.013756			1.28	0.012414
														1.28083	0.013674			1.28083	0.012478
														1.28167	0.013655			1.28167	0.012491
														1.2825	0.013649			1.2825	0.012486
														1.28333	0.013668			1.28333	0.012481
														1.28417	0.013636			1.28417	0.012441
														1.285	0.013667			1.285	0.012384
														1.28583	0.013699			1.28583	0.01236
														1.28667	0.013673			1.28667	0.012325
														1.2875	0.013623			1.2875	0.012293
														1.28833	0.013668			1.28833	0.012269
														1.28917	0.013672			1.28917	0.012245
														1.29	0.013626			1.29	0.012212
														1.29083	0.013634			1.29083	0.012188
														1.29167	0.013645			1.29167	0.012161
														1.2925	0.013568			1.2925	0.012139
														1.29333	0.013518			1.29333	0.01211
														1.29417	0.013463			1.29417	0.012087
														1.295	0.013403			1.295	0.012082
														1.29583	0.013381			1.29583	0.012098
														1.29667	0.013388			1.29667	0.012116
														1.2975	0.013382			1.2975	0.012126
														1.29833	0.013443			1.29833	0.01213
														1.29917	0.01346			1.29917	0.012094
														1.3	0.013438			1.3	0.012044
														1.30083	0.013437			1.30083	0.012011
														1.30167	0.013412			1.30167	0.011986
														1.3025	0.013357			1.3025	0.011976
														1.30333	0.013334			1.30333	0.012014
														1.30417	0.013328			1.30417	0.012053
														1.305	0.013306			1.305	0.012035
														1.30583	0.013294			1.30583	0.012046
														1.30667	0.013272			1.30667	0.012019
														1.3075	0.01327			1.3075	0.011969
														1.30833	0.013234			1.30833	0.011898
														1.30917	0.013204			1.30917	0.011892
														1.31	0.013185			1.31	0.011852
														1.31083	0.013174			1.31083	0.011816
														1.31167	0.013167			1.31167	0.011763
														1.3125	0.013173			1.3125	0.011743
														1.31333	0.013197			1.31333	0.011699
														1.31417	0.013227			1.31417	0.011663
														1.315	0.013224			1.315	0.011672
														1.31583	0.013172			1.31583	0.011697
														1.31667	0.01314			1.31667	0.011719
														1.3175	0.013064			1.3175	0.011733
														1.31833	0.012982			1.31833	0.011733
														1.31917	0.012946			1.31917	0.011688
														1.32	0.012935			1.32	0.011646
														1.32083	0.012933			1.32083	0.011553
														1.32167	0.012958			1.32167	0.011488
														1.3225	0.012971			1.3225	0.011456
														1.32333	0.012964			1.32333	0.011439
														1.32417	0.012966			1.32417	0.011432
														1.325	0.012955			1.325	0.011493
														1.32583	0.01293			1.32583	0.011521
														1.32667	0.012942			1.32667	0.01151
														1.3275	0.012958			1.3275	0.011517
														1.32833	0.012949			1.32833	0.011521
														1.32917	0.01293			1.32917	0.011484
														1.33	0.012931			1.33	0.011469
														1.33083	0.012891			1.33083	0.011486
														1.33167	0.012845			1.33167	0.011469
														1.3325	0.012833			1.3325	0.011468
														1.33333	0.012805			1.33333	0.011464
														1.33417	0.012786			1.33417	0.011415
														1.335	0.012762			1.335	0.011358
														1.33583	0.012732			1.33583	0.011322
														1.33667	0.012691			1.33667	0.011242
														1.3375	0.012704			1.3375	0.011162
														1.33833	0.012708			1.33833	0.011141
														1.33917	0.012725			1.33917	0.011125
														1.34	0.012764			1.34	0.011113
														1.34083	0.012767			1.34083	0.011137
														1.34167	0.01273			1.34167	0.011189
														1.3425	0.012674			1.3425	0.011198
														1.34333	0.012618			1.34333	0.011209
														1.34417	0.012554			1.34417	0.011206
														1.345	0.012527			1.345	0.011198
														1.34583	0.01252			1.34583	0.011193
														1.34667	0.012521			1.34667	0.011206
														1.3475	0.012573			1.3475	0.011224
														1.34833	0.012599			1.34833	0.011225
														1.34917	0.012624			1.34917	0.011238
														1.35	0.012642			1.35	0.011183
														1.35083	0.012665			1.35083	0.011168
														1.35167	0.012616			1.35167	0.011112
														1.3525	0.012583			1.3525	0.011101
														1.35333	0.012568			1.35333	0.011033
														1.35417	0.012543			1.35417	0.011068
														1.355	0.012506			1.355	0.011057
														1.35583	0.012525			1.35583	0.011078
														1.35667	0.012562			1.35667	0.011066
														1.3575	0.012567			1.3575	0.011127
														1.35833	0.012593			1.35833	0.011103
														1.35917	0.012597			1.35917	0.011048
														1.36	0.012555			1.36	0.011027
														1.36083	0.012524			1.36083	0.011019
														1.36167	0.012481			1.36167	0.01096
														1.3625	0.012433			1.3625	0.010958
														1.36333	0.012433			1.36333	0.011016
														1.36417	0.012435			1.36417	0.011029
														1.365	0.012421			1.365	0.011036
														1.36583	0.012422			1.36583	0.011057
														1.36667	0.012392			1.36667	0.01106
														1.3675	0.012358			1.3675	0.011038
														1.36833	0.012338			1.36833	0.011008
														1.36917	0.012284			1.36917	0.010986
														1.37	0.012249			1.37	0.010947
														1.37083	0.012263			1.37083	0.010918
														1.37167	0.012257			1.37167	0.010899
														1.3725	0.012281			1.3725	0.01091
														1.37333	0.012342			1.37333	0.010908
														1.37417	0.012396			1.37417	0.010941
														1.375	0.012407			1.375	0.01095
														1.37583	0.012434			1.37583	0.01093
														1.37667	0.012411			1.37667	0.010902
														1.3775	0.012379			1.3775	0.010889
														1.37833	0.012332			1.37833	0.010867
														1.37917	0.01231			1.37917	0.010864
														1.38	0.012285			1.38	0.010889
														1.38083	0.012285			1.38083	0.010916
														1.38167	0.012277			1.38167	0.010923
														1.3825	0.01228			1.3825	0.010925
														1.38333	0.012255			1.38333	0.01092
														1.38417	0.012215			1.38417	0.0109
														1.385	0.012183			1.385	0.010881
														1.38583	0.012155			1.38583	0.010851
														1.38667	0.01213			1.38667	0.010839
														1.3875	0.012126			1.3875	0.010823
														1.38833	0.012156			1.38833	0.010816
														1.38917	0.01217			1.38917	0.010779
														1.39	0.012195			1.39	0.010804
														1.39083	0.012217			1.39083	0.010778
														1.39167	0.012267			1.39167	0.010773
														1.3925	0.012248			1.3925	0.010747
														1.39333	0.01222			1.39333	0.010756
														1.39417	0.012214			1.39417	0.010716
														1.395	0.0122			1.395	0.010709
														1.39583	0.012135			1.39583	0.010666
														1.39667	0.012148			1.39667	0.010659
														1.3975	0.012161			1.3975	0.010637
														1.39833	0.012138			1.39833	0.010608
														1.39917	0.012105			1.39917	0.010603
														1.4	0.012102			1.4	0.010636
														1.40083	0.01204			1.40083	0.010628
														1.40167	0.012006			1.40167	0.010629
														1.4025	0.011966			1.4025	0.010667
														1.40333	0.011949			1.40333	0.010672
														1.40417	0.011916			1.40417	0.010643
														1.405	0.011895			1.405	0.010651
														1.40583	0.011872			1.40583	0.01065
														1.40667	0.011865			1.40667	0.010611
														1.4075	0.011844			1.4075	0.010602
														1.40833	0.011842			1.40833	0.010625
														1.40917	0.011874			1.40917	0.010633
														1.41	0.011883			1.41	0.010641
														1.41083	0.011886			1.41083	0.010693
														1.41167	0.01189			1.41167	0.010711
														1.4125	0.011868			1.4125	0.010704
														1.41333	0.011851			1.41333	0.010667
														1.41417	0.011863			1.41417	0.010637
														1.415	0.011903			1.415	0.010562
														1.41583	0.01193			1.41583	0.010521
														1.41667	0.011994			1.41667	0.010495
														1.4175	0.012008			1.4175	0.010504
														1.41833	0.011982			1.41833	0.010526
														1.41917	0.011907			1.41917	0.010567
														1.42	0.011889			1.42	0.010569
														1.42083	0.011842			1.42083	0.01055
														1.42167	0.011824			1.42167	0.010546
														1.4225	0.011821			1.4225	0.010507
														1.42333	0.011857			1.42333	0.010472
														1.42417	0.011841			1.42417	0.010441
														1.425	0.011829			1.425	0.01044
														1.42583	0.011833			1.42583	0.010409
														1.42667	0.011831			1.42667	0.010396
														1.4275	0.011823			1.4275	0.010407
														1.42833	0.011831			1.42833	0.010424
														1.42917	0.01184			1.42917	0.010456
														1.43	0.011809			1.43	0.010484
														1.43083	0.011835			1.43083	0.010522
														1.43167	0.01182			1.43167	0.0105
														1.4325	0.011802			1.4325	0.010493
														1.43333	0.011794			1.43333	0.010445
														1.43417	0.011799			1.43417	0.010412
														1.435	0.011746			1.435	0.010365
														1.43583	0.01174			1.43583	0.010378
														1.43667	0.011709			1.43667	0.010382
														1.4375	0.01168			1.4375	0.010386
														1.43833	0.011675			1.43833	0.010396
														1.43917	0.011673			1.43917	0.010409
														1.44	0.011659			1.44	0.010379
														1.44083	0.011694			1.44083	0.010353
														1.44167	0.011727			1.44167	0.010327
														1.4425	0.011732			1.4425	0.010285
														1.44333	0.011732			1.44333	0.010245
														1.44417	0.011724			1.44417	0.01023
														1.445	0.011701			1.445	0.010209
														1.44583	0.011676			1.44583	0.010213
														1.44667	0.011659			1.44667	0.01024
														1.4475	0.011659			1.4475	0.010293
														1.44833	0.011659			1.44833	0.01034
														1.44917	0.011658			1.44917	0.010376
														1.45	0.011619			1.45	0.010402
														1.45083	0.011606			1.45083	0.010418
														1.45167	0.0116			1.45167	0.010382
														1.4525	0.011623			1.4525	0.010337
														1.45333	0.011628			1.45333	0.010315
														1.45417	0.011661			1.45417	0.010274
														1.455	0.011681			1.455	0.010214
														1.45583	0.011689			1.45583	0.010181
														1.45667	0.011685			1.45667	0.010162
														1.4575	0.011694			1.4575	0.010149
														1.45833	0.011722			1.45833	0.010168
														1.45917	0.011738			1.45917	0.010202
														1.46	0.01175			1.46	0.010259
														1.46083	0.011759			1.46083	0.010287
														1.46167	0.011744			1.46167	0.010277
														1.4625	0.011735			1.4625	0.010244
														1.46333	0.011712			1.46333	0.010226
														1.46417	0.011685			1.46417	0.010179
														1.465	0.011649			1.465	0.010172
														1.46583	0.011647			1.46583	0.010175
														1.46667	0.011605			1.46667	0.01019
														1.4675	0.011595			1.4675	0.010159
														1.46833	0.011616			1.46833	0.010149
														1.46917	0.011631			1.46917	0.010113
														1.47	0.01164			1.47	0.010083
														1.47083	0.01166			1.47083	0.010076
														1.47167	0.011646			1.47167	0.010123
														1.4725	0.011587			1.4725	0.010153
														1.47333	0.011554			1.47333	0.010189
														1.47417	0.011524			1.47417	0.010253
														1.475	0.011519			1.475	0.010271
														1.47583	0.011536			1.47583	0.010245
														1.47667	0.011557			1.47667	0.010237
														1.4775	0.011566			1.4775	0.010244
														1.47833	0.011564			1.47833	0.010207
														1.47917	0.011517			1.47917	0.010184
														1.48	0.011488			1.48	0.010186
														1.48083	0.011469			1.48083	0.010156
														1.48167	0.011468			1.48167	0.010092
														1.4825	0.011474			1.4825	0.010061
														1.48333	0.011522			1.48333	0.010058
														1.48417	0.011524			1.48417	0.010051
														1.485	0.011553			1.485	0.010028
														1.48583	0.011544			1.48583	0.010043
														1.48667	0.01153			1.48667	0.010055
														1.4875	0.011505			1.4875	0.010037
														1.48833	0.011528			1.48833	0.010011
														1.48917	0.011542			1.48917	0.01005
														1.49	0.01158			1.49	0.01005
														1.49083	0.011592			1.49083	0.010013
														1.49167	0.01162			1.49167	0.010005
														1.4925	0.011605			1.4925	0.009993
														1.49333	0.011593			1.49333	0.009958
														1.49417	0.011558			1.49417	0.00996
														1.495	0.011567			1.495	0.010005
														1.49583	0.011533			1.49583	0.010028
														1.49667	0.011555			1.49667	0.010087
														1.4975	0.011531			1.4975	0.010121
														1.49833	0.01157			1.49833	0.010157
														1.49917	0.011581			1.49917	0.010194
														1.5	0.011614			1.5	0.010207
														1.50083	0.01162			1.50083	0.010203
														1.50167	0.01166			1.50167	0.010234
														1.5025	0.011631			1.5025	0.010216
														1.50333	0.011589			1.50333	0.010181
														1.50417	0.011547			1.50417	0.010175
														1.505	0.011493			1.505	0.010143
														1.50583	0.011421			1.50583	0.010074
														1.50667	0.011363			1.50667	0.010055
														1.5075	0.011359			1.5075	0.010018
														1.50833	0.01137			1.50833	0.009967
														1.50917	0.011375			1.50917	0.009943
														1.51	0.011396			1.51	0.009925
														1.51083	0.011428			1.51083	0.009859
														1.51167	0.011414			1.51167	0.009808
														1.5125	0.011399			1.5125	0.009802
														1.51333	0.011407			1.51333	0.009768
														1.51417	0.011407			1.51417	0.009763
														1.515	0.011396			1.515	0.009788
														1.51583	0.011415			1.51583	0.009824
														1.51667	0.011413			1.51667	0.009823
														1.5175	0.011366			1.5175	0.009849
														1.51833	0.011347			1.51833	0.009871
														1.51917	0.011343			1.51917	0.009925
														1.52	0.011313			1.52	0.009963
														1.52083	0.01128			1.52083	0.010013
														1.52167	0.011291			1.52167	0.010066
														1.5225	0.011284			1.5225	0.010087
														1.52333	0.01128			1.52333	0.010049
														1.52417	0.011306			1.52417	0.010035
														1.525	0.011337			1.525	0.010026
														1.52583	0.011367			1.52583	0.00998
														1.52667	0.011366			1.52667	0.009989
														1.5275	0.011366			1.5275	0.010008
														1.52833	0.011335			1.52833	0.010041
														1.52917	0.01132			1.52917	0.009993
														1.53	0.011301			1.53	0.010024
														1.53083	0.011352			1.53083	0.009985
														1.53167	0.011373			1.53167	0.010014
														1.5325	0.011425			1.5325	0.009964
														1.53333	0.011469			1.53333	0.010005
														1.53417	0.011499			1.53417	0.009988
														1.535	0.011472			1.535	0.010017
														1.53583	0.011504			1.53583	0.009939
														1.53667	0.01151			1.53667	0.009947
														1.5375	0.011502			1.5375	0.009924
														1.53833	0.011508			1.53833	0.009866
														1.53917	0.011505			1.53917	0.00981
														1.54	0.011438			1.54	0.009829
														1.54083	0.011404			1.54083	0.009806
														1.54167	0.011375			1.54167	0.009745
														1.5425	0.011351			1.5425	0.00977
														1.54333	0.011363			1.54333	0.009796
														1.54417	0.011417			1.54417	0.009787
														1.545	0.011427			1.545	0.009784
														1.54583	0.011449			1.54583	0.009864
														1.54667	0.011459			1.54667	0.009894
														1.5475	0.011456			1.5475	0.009909
														1.54833	0.01144			1.54833	0.009921
														1.54917	0.011441			1.54917	0.009924
														1.55	0.011442			1.55	0.009886
														1.55083	0.011446			1.55083	0.009859
														1.55167	0.011458			1.55167	0.009841
														1.5525	0.011484			1.5525	0.009853
														1.55333	0.011506			1.55333	0.009905
														1.55417	0.011536			1.55417	0.009967
														1.555	0.011571			1.555	0.010031
														1.55583	0.011587			1.55583	0.010068
														1.55667	0.01157			1.55667	0.010094
														1.5575	0.011579			1.5575	0.010087
														1.55833	0.011537			1.55833	0.010078
														1.55917	0.011501			1.55917	0.010057
														1.56	0.011474			1.56	0.010064
														1.56083	0.011472			1.56083	0.010072
														1.56167	0.011438			1.56167	0.010068
														1.5625	0.011448			1.5625	0.010027
														1.56333	0.011441			1.56333	0.009975
														1.56417	0.01145			1.56417	0.009933
														1.565	0.011432			1.565	0.009891
														1.56583	0.011441			1.56583	0.009892
														1.56667	0.011453			1.56667	0.009926
														1.5675	0.011465			1.5675	0.009962
														1.56833	0.011429			1.56833	0.009964
														1.56917	0.011442			1.56917	0.00995
														1.57	0.011445			1.57	0.009908
														1.57083	0.011428			1.57083	0.009857
														1.57167	0.011421			1.57167	0.009844
														1.5725	0.011483			1.5725	0.009846
														1.57333	0.011495			1.57333	0.009867
														1.57417	0.011518			1.57417	0.009887
														1.575	0.011554			1.575	0.009893
														1.57583	0.011594			1.57583	0.00989
														1.57667	0.011582			1.57667	0.00989
														1.5775	0.011592			1.5775	0.00989
														1.57833	0.011587			1.57833	0.009859
														1.57917	0.011537			1.57917	0.009858
														1.58	0.011502			1.58	0.009831
														1.58083	0.011505			1.58083	0.009814
														1.58167	0.011494			1.58167	0.009777
														1.5825	0.011476			1.5825	0.009794
														1.58333	0.01153			1.58333	0.009803
														1.58417	0.01154			1.58417	0.009864
														1.585	0.011506			1.585	0.009926
														1.58583	0.011498			1.58583	0.010024
														1.58667	0.011502			1.58667	0.01011
														1.5875	0.011478			1.5875	0.010164
														1.58833	0.011461			1.58833	0.010183
														1.58917	0.011496			1.58917	0.010186
														1.59	0.011487			1.59	0.010133
														1.59083	0.011505			1.59083	0.010062
														1.59167	0.011493			1.59167	0.01006
														1.5925	0.011513			1.5925	0.010027
														1.59333	0.011499			1.59333	0.009995
														1.59417	0.011527			1.59417	0.010007
														1.595	0.011516			1.595	0.010033
														1.59583	0.011555			1.59583	0.009986
														1.59667	0.011577			1.59667	0.00998
														1.5975	0.011585			1.5975	0.00997
														1.59833	0.01157			1.59833	0.009932
														1.59917	0.011547			1.59917	0.009909
														1.6	0.01149			1.6	0.009921
														1.60083	0.01144			1.60083	0.009916
														1.60167	0.011407			1.60167	0.009898
														1.6025	0.011391			1.6025	0.009901
														1.60333	0.011399			1.60333	0.009874
														1.60417	0.01141			1.60417	0.00984
														1.605	0.01141			1.605	0.00981
														1.60583	0.011394			1.60583	0.009833
														1.60667	0.011375			1.60667	0.009843
														1.6075	0.011366			1.6075	0.009874
														1.60833	0.011383			1.60833	0.009902
														1.60917	0.01143			1.60917	0.009951
														1.61	0.011509			1.61	0.00995
														1.61083	0.011564			1.61083	0.009974
														1.61167	0.011625			1.61167	0.009982
														1.6125	0.011646			1.6125	0.009991
														1.61333	0.011624			1.61333	0.009958
														1.61417	0.011592			1.61417	0.009967
														1.615	0.011613			1.615	0.009964
														1.61583	0.011592			1.61583	0.009979
														1.61667	0.011591			1.61667	0.010018
														1.6175	0.011613			1.6175	0.010071
														1.61833	0.011615			1.61833	0.010092
														1.61917	0.011559			1.61917	0.010113
														1.62	0.01153			1.62	0.010096
														1.62083	0.011497			1.62083	0.010033
														1.62167	0.01146			1.62167	0.009974
														1.6225	0.011478			1.6225	0.009919
														1.62333	0.011528			1.62333	0.009843
														1.62417	0.011556			1.62417	0.009824
														1.625	0.011573			1.625	0.009849
														1.62583	0.011614			1.62583	0.009879
														1.62667	0.011582			1.62667	0.009917
														1.6275	0.011532			1.6275	0.009993
														1.62833	0.011519			1.62833	0.01
														1.62917	0.011513			1.62917	0.009955
														1.63	0.011481			1.63	0.009944
														1.63083	0.011478			1.63083	0.009905
														1.63167	0.011511			1.63167	0.009841
														1.6325	0.011493			1.6325	0.009844
														1.63333	0.011506			1.63333	0.009884
														1.63417	0.011507			1.63417	0.009885
														1.635	0.011521			1.635	0.009892
														1.63583	0.011495			1.63583	0.009909
														1.63667	0.011521			1.63667	0.009911
														1.6375	0.0115			1.6375	0.009893
														1.63833	0.011504			1.63833	0.009876
														1.63917	0.011522			1.63917	0.00987
														1.64	0.011571			1.64	0.00987
														1.64083	0.011579			1.64083	0.009854
														1.64167	0.011623			1.64167	0.009894
														1.6425	0.011645			1.6425	0.009951
														1.64333	0.011633			1.64333	0.010048
														1.64417	0.011572			1.64417	0.010132
														1.645	0.011545			1.645	0.010237
														1.64583	0.011498			1.64583	0.010253
														1.64667	0.011471			1.64667	0.010243
														1.6475	0.011455			1.6475	0.01021
														1.64833	0.011473			1.64833	0.010155
														1.64917	0.011487			1.64917	0.010094
														1.65	0.011497			1.65	0.010089
														1.65083	0.011503			1.65083	0.010101
														1.65167	0.011492			1.65167	0.010096
														1.6525	0.011492			1.6525	0.010115
														1.65333	0.011462			1.65333	0.010094
														1.65417	0.011445			1.65417	0.010064
														1.655	0.011435			1.655	0.010018
														1.65583	0.011442			1.65583	0.009976
														1.65667	0.011455			1.65667	0.009912
														1.6575	0.011507			1.6575	0.009889
														1.65833	0.011572			1.65833	0.009842
														1.65917	0.011601			1.65917	0.009859
														1.66	0.011644			1.66	0.009857
														1.66083	0.01166			1.66083	0.009898
														1.66167	0.011645			1.66167	0.009903
														1.6625	0.011597			1.6625	0.009952
														1.66333	0.011588			1.66333	0.009927
														1.66417	0.011541			1.66417	0.009934
[truncated: 6,403 more rows]

## Sheet: Fig. 1b
APP17 to buffer for background substraction							APP17 to SD1/2								scAPP17 to buffer for background substraction							scAPP17 to SD1/2
DH	INJV	Xt	Mt	XMt	NDH		DH	INJV	Xt	Mt	XMt	NDH			DH	INJV	Xt	Mt	XMt	NDH		DH	INJV	Xt	Mt	XMt	NDH
-0.03125	0.5	0	1	0.000745711	-208.317		-1.76197	0.5	0	0.03	0.02486	-11746.5			-0.03592	0.5	0	0.03	0.02486	-239.445		-0.32572	0.5	0	0.03	0.02486	-2171.49
-0.07336	1.5	0.000743862	0.99752	0.00299	-163.026		-6.22814	1.5	0.000743862	0.02993	0.0998	-13840.3			-0.16544	1.5	0.000743862	0.02993	0.0998	-367.648		-0.75553	1.5	0.000743862	0.02993	0.0998	-1678.95
-0.08427	1.5	0.00296	0.99012	0.00526	-187.272		-6.17984	1.5	0.00296	0.0297	0.17529	-13733			-0.15823	1.5	0.00296	0.0297	0.17529	-351.632		-0.69173	1.5	0.00296	0.0297	0.17529	-1537.17
-0.07119	1.5	0.00517	0.98277	0.00754	-158.209		-6.03516	1.5	0.00517	0.02948	0.25134	-13411.5			-0.18167	1.5	0.00517	0.02948	0.25134	-403.714		-0.6804	1.5	0.00517	0.02948	0.25134	-1512
-0.13135	1.5	0.00736	0.97548	0.00984	-291.883		-6.00354	1.5	0.00736	0.02926	0.32795	-13341.2			-0.08459	1.5	0.00736	0.02926	0.32795	-187.981		-0.65108	1.5	0.00736	0.02926	0.32795	-1446.85
-0.0667	1.5	0.00953	0.96824	0.01215	-148.23		-6.03114	1.5	0.00953	0.02905	0.40511	-13402.5			-0.19392	1.5	0.00953	0.02905	0.40511	-430.944		-0.59679	1.5	0.00953	0.02905	0.40511	-1326.2
-0.03787	1.5	0.01168	0.96105	0.01448	-84.1571		-5.94199	1.5	0.01168	0.02883	0.48282	-13204.4			-0.15993	1.5	0.01168	0.02883	0.48282	-355.404		-0.61284	1.5	0.01168	0.02883	0.48282	-1361.87
-0.10853	1.5	0.01382	0.95392	0.01683	-241.174		-5.90731	1.5	0.01382	0.02862	0.56109	-13127.4			-0.15044	1.5	0.01382	0.02862	0.56109	-334.308		-0.21917	1.5	0.01382	0.02862	0.56109	-487.039
-0.11236	1.5	0.01594	0.94683	0.0192	-249.681		-5.67929	1.5	0.01594	0.02841	0.63992	-12620.7			-0.1424	1.5	0.01594	0.02841	0.63992	-316.435		-0.56617	1.5	0.01594	0.02841	0.63992	-1258.15
-0.05188	1.5	0.01804	0.9398	0.02158	-115.289		-5.52268	1.5	0.01804	0.02819	0.71929	-12272.6			-0.16865	1.5	0.01804	0.02819	0.71929	-374.784		-0.58262	1.5	0.01804	0.02819	0.71929	-1294.72
-0.05479	1.5	0.02013	0.93282	0.02398	-121.758		-5.26402	1.5	0.02013	0.02798	0.79923	-11697.8			-0.18424	1.5	0.02013	0.02798	0.79923	-409.419		-0.62249	1.5	0.02013	0.02798	0.79923	-1383.32
-0.08405	1.5	0.0222	0.92589	0.02639	-186.777		-4.77069	1.5	0.0222	0.02778	0.87972	-10601.5			-0.09913	1.5	0.0222	0.02778	0.87972	-220.28		-0.4653	1.5	0.0222	0.02778	0.87972	-1033.99
-0.06952	1.5	0.02425	0.91901	0.02882	-154.492		-4.41945	1.5	0.02425	0.02757	0.96076	-9821			-0.12414	1.5	0.02425	0.02757	0.96076	-275.862		-0.55417	1.5	0.02425	0.02757	0.96076	-1231.48
-0.02838	1.5	0.02629	0.91218	0.03127	-63.0574		-3.35921	1.5	0.02629	0.02737	1.04236	-7464.92			-0.08508	1.5	0.02629	0.02737	1.04236	-189.065		-0.55566	1.5	0.02629	0.02737	1.04236	-1234.79
-0.03804	1.5	0.02831	0.90539	0.03374	-84.532		-2.41807	1.5	0.02831	0.02716	1.12451	-5373.48			-0.12387	1.5	0.02831	0.02716	1.12451	-275.273		-0.56509	1.5	0.02831	0.02716	1.12451	-1255.75
-0.07745	1.5	0.03032	0.89866	0.03622	-172.112		-1.63112	1.5	0.03032	0.02696	1.20721	-3624.72			-0.0857	1.5	0.03032	0.02696	1.20721	-190.449		-0.58521	1.5	0.03032	0.02696	1.20721	-1300.47
-0.03567	1.5	0.0323	0.89197	0.03871	-79.2738		-1.11364	1.5	0.0323	0.02676	1.29048	-2474.76			-0.12904	1.5	0.0323	0.02676	1.29048	-286.763		-0.52356	1.5	0.0323	0.02676	1.29048	-1163.47
-0.04531	1.5	0.03427	0.88533	0.04123	-100.685		-0.76776	1.5	0.03427	0.02656	1.37429	-1706.12			-0.11188	1.5	0.03427	0.02656	1.37429	-248.619		-0.48994	1.5	0.03427	0.02656	1.37429	-1088.75
-0.05481	1.5	0.03623	0.87873	0.04376	-121.79		-0.57881	1.5	0.03623	0.02636	1.45866	-1286.25			-0.13677	1.5	0.03623	0.02636	1.45866	-303.933		-0.49317	1.5	0.03623	0.02636	1.45866	-1095.92
-0.06465	1.5	0.03817	0.87218	0.04631	-143.656		-0.44647	1.5	0.03817	0.02617	1.54359	-992.16			-0.12553	1.5	0.03817	0.02617	1.54359	-278.948		-0.54359	1.5	0.03817	0.02617	1.54359	-1207.98
-0.05813	1.5	0.04009	0.86568	0.04887	-129.181		-0.39611	1.5	0.04009	0.02597	1.62907	-880.251			-0.1297	1.5	0.04009	0.02597	1.62907	-288.229		-0.50198	1.5	0.04009	0.02597	1.62907	-1115.52
-0.04502	1.5	0.04199	0.85922	0.05145	-100.055		-0.35488	1.5	0.04199	0.02578	1.7151	-788.621			-0.07016	1.5	0.04199	0.02578	1.7151	-155.915		-0.45973	1.5	0.04199	0.02578	1.7151	-1021.63
-0.04723	1.5	0.04388	0.85281	0.05405	-104.948		-0.28122	1.5	0.04388	0.02558	1.80169	-624.924			-0.13838	1.5	0.04388	0.02558	1.80169	-307.512		-0.63169	1.5	0.04388	0.02558	1.80169	-1403.75
-0.05801	1.5	0.04575	0.84644	0.05667	-128.907		-0.30012	1.5	0.04575	0.02539	1.88884	-666.937			-0.13226	1.5	0.04575	0.02539	1.88884	-293.902		-0.55145	1.5	0.04575	0.02539	1.88884	-1225.44
-0.05976	1.5	0.0476	0.84011	0.0593	-132.807		-0.22655	1.5	0.0476	0.0252	1.97654	-503.436			-0.14953	1.5	0.0476	0.0252	1.97654	-332.292		-0.43204	1.5	0.0476	0.0252	1.97654	-960.095
-0.07091	1.5	0.04944	0.83383	0.06194	-157.584		-0.26	1.5	0.04944	0.02501	2.06479	-577.772			-0.12755	1.5	0.04944	0.02501	2.06479	-283.452		-0.46499	1.5	0.04944	0.02501	2.06479	-1033.31
	--	0.05126	0.82759	--				--	0.05126	0.02483	--					--	0.05126	0.02483	--				--	0.05126	0.02483	--
Abbreviations
DH	Experimental heat change resulting from injection i, in μcal/injection
INJV	Volume of injectant added for the injection i
Xt	Concentration of injected solute in the cell before each injection
Mt	Concentration of macromolecule in the cell before each injection i, after correction for volume displacement
XMt	Molar ratio of ligand to macromolecule after injection i
NDH	Normalized heat change for injection i, in calories per mole of injectant added

## Sheet: Fig. 1c
1 µM APP17-TMR + vehicle	1 µM APP17-TMR + 10 µM APP17	1 µM APP17-TMR + 10 µM sc-APP17	1 µM scAPP17-TMR + vehicle
4497.44	-2021.68	-2258.89	-3333.1
2085.65	-2484.76	5292.44	78.3611
5456.89	3998.31	3275.31	413.139
5245.89	787.139	7443.31	-134.611
4069.56	3533.89	3604.56	1036.89
4130.39	2421.06	3063.31	127.806
2161.47	1458.72	2469.06	5810.97
2264.47	-221.778	3995.22	-2879.19
1927.39	-95.7778	2816.72	-1733.94
1292.06	1469.89	1868.22	-2047.28
1193.72	982.722	5984.14	1900.47
2997.81	-314.111	378.639	668.972
