# Supplementary material for: Soluble amyloid-β precursor peptide does not regulate GABAB receptor activity
Source: eLife. 2023 Jan 23;12:e82082. doi: 10.7554/eLife.82082 (PMC9917443; doi:10.7554/eLife.82082)
Supplement: Figure 2—source data 1. [file elife-82082-fig2-data1.xlsx]

## Sheet: Fig. 2b
Log [GABA] (M)	Vehicle						1 µM APP17						10 µM APP17						1 µM scAPP17						10 µM scAPP17
-2	62.7245	53.6165	59.7687	49.2949	40.7473	45.4243	57.7134	46.2181	56.4	52.7129	60.9216	47.8106	52.76	47.973	54.8608	49.4168	39.4344	60.3802	46.942	47.1757	61.9221	63.3396	51.1159	73.2598	52.8823	48.5339	52.9671	55.772	43.3763	37.1242
-3	73.0778	69.7787	79.5958	62.5829	64.9372	59.537	81.9055	62.1088	65.2705	54.1578	83.9127	63.0748	74.1856	50.3962	66.1474	66.4538	91.181	58.059	78.1469	65.9643	85.3125	76.4403	73.466	57.2516	63.2289	59.3485	67.156	69.3111	94.6148	52.2169
-4	69.7962	68.7621	75.4452	75.0954	87.4517	72.2193	94.9227	86.3306	76.8762	71.6814	85.8283	58.9265	74.998	76.9273	78.0065	64.8002	74.7345	76.2484	71.953	77.0087	72.3014	70.1902	78.7133	67.1545	69.9499	53.9799	66.3143	65.051	79.4026	64.5656
-5	81.4491	81.234	94.1821	92.2918	91.4273	73.0641	87.0166	81.1098	83.3961	86.9812	123.986	105.493	121.6	84.8261	104.449	78.7947	101.073	129.872	86.4832	78.3786	82.8953	87.9463	106.523	64.6041	75.8179	61.6712	99.9518	74.8119	111.913	82.8093
-6	91.0733	110.237	109.946	95.0906	98.6104	115.474	105.28	113.995	109.656	100.655	116.154	112.324	113.812	105.006	115.859	108.66	174.631	134.566	105.098	95.9161	111.043	105.465	106.262	77.8441	86.8232	77.474	94.8071	84.7998	102.319	75.179
-7	117.322	101.895	104.899	100.181	108.485	102.28	119.481	100.009	108.185	112.894	147.584	109.675	116.237	99.7799	116.586	134.132	142.303	136.806	95.406	100.309	108.177	110.683	172.444	98.495	97.8633	84.1637	92.8468	95.4347	101.295	106.601
-8	108.097	109.945	94.8878	105.485	108.96	111.348	91.0912	105.447	113.341	125.673	131.645	111.938	122.241	131.195	132.466	117.748	144.723	124.924	90.5642	88.9522	107.068	106.188	104.25	113.006	100.686	51.9515	99.1964	96.6742	109.103	91.4754
-9	80.4718	77.9227	90.5983	93.9844	84.864	75.9053	101.166	92.9908	96.7368	104.764	123.661	113.451	125.992	115.005	125.979	102.021	125.988	97.0618	68.7146	62.029	103.749	89.3969	111.429	34.8616	74.8368	70.2363	92.9373	83.1514	101.531	85.2054

## Sheet: Fig. 2c
	Basal						10mM GABA
+ Vehicle	100	100	100	100	100	100	67.78	64.05	68.54	43.37	18.21	48.06
+ 1 µM APP17	103.3	101	107.6	115.2	132.7	111.9	-11750*	28.98	58.07	49.76	60.83	55.36
+ 10 µM APP17	120	119.3	127.7	117.6	144.4	124.3	63.47	34.4	49.12	59.27	68.45	59.22
+ 1 µM scAPP17	88.34	87.73	107.5	102.7	121	65.57	-222098*	29.41	73.18	69.99	51.73	86.53
+ 10 µM scAPP17	90.75	69.76	95.95	91.68	104.2	90.96	53.02	53.95	60.06	60.44	-19605*	23.67
identified outliers

## Sheet: Fig. 2d
Vehicle	1 µM APP17	10 µM APP17	1 µM scAPP17	10 µM scAPP17
-5.192	-5.687	-4.119	-6.296	-4.23
-5.004	-3.087	-4.341	-2.656	-5.001
-4.38	-4.543	-4.357	-5.07	-4.115
-3.672	-4.73	-5.247	-4.989	-5.056
-2.763	-4.089	-5.008	-4.098	-3.771
-4.278	-4.563	-4.041	-5.981	-3.41
