# Supplementary material for: Soluble amyloid-β precursor peptide does not regulate GABAB receptor activity
Source: eLife. 2023 Jan 23;12:e82082. doi: 10.7554/eLife.82082 (PMC9917443; doi:10.7554/eLife.82082)
Supplement: Figure 3—source data 1. [file elife-82082-fig3-data1.xlsx]

## Sheet: Fig.3a
Trace (left) 10 µM GABA / 10 µM CGP					Trace (right) 10 µM CGP / 10 µM GABA					Column graph 10 µM CGP
Time (s)	GB1a/2	GB1a/2 + APP			Time (s)	GB1a/2	GB1a/2 + APP			GB1a/2	GB1a/2 + APP
0	100.823	99.3586			0	101.215	101.302			15.87	11.4515
7.704	100.994	100.446			7.711	103.358	101.605			17.1125	14.6445
15.408	100.223	99.1752			15.42	99.6193	99.0274			9.96448	7.02761
23.109	99.2131	99.319			23.125	101.448	101.956			15.9142	12.3979
30.815	100.141	99.4057			30.836	100.924	100.928			10.5286	10.3804
38.519	99.8813	100.297			38.547	101.024	99.9664			18.2968	15.6972
46.222	99.3671	99.9916			46.255	100.697	99.4997			12.7749	11.389
53.927	100.486	99.7569			53.963	97.9304	99.3885			8.31556	8.27722
61.624	98.9061	98.5669			61.667	98.4343	99.4693
69.327	99.8332	99.668			69.381	100.082	100.585
77.039	100.4	99.4145			77.092	99.7755	101.129
84.747	99.7421	100.734			84.808	99.2008	98.8693
92.448	100.038	100.744			92.517	99.419	100.262
100.15	99.7089	99.7755			100.233	100.753	99.5813
107.85	100.083	99.0366			107.94	99.9007	98.7734
115.551	100.864	101.446			115.652	98.6481	99.1476
123.254	100.235	101.614			123.362	99.8895	100.135
130.954	100.76	100.499			131.072	100.353	99.5677
138.662	98.6056	99.5234			138.775	100.582	100.464
146.369	100.216	100.609			146.487	99.5713	100.464
154.075	99.4802	100.619			154.195	97.1756	97.8811
164.528	82.4463	83.5603			164.669	99.7298	98.7901
172.23	79.388	80.1237			172.376	101.969	101.438
179.935	77.9519	78.8215			180.088	105.223	102.284
187.637	77.5118	77.8723			187.793	103.609	104.428
195.343	76.7908	77.6856			195.501	104.269	105.082
203.05	76.6022	77.1005			203.213	106.681	107.372
210.758	76.4746	76.7799			210.919	107.276	107.623
218.464	75.9612	76.5787			218.627	105.494	105.443
226.17	77.1996	77.1599			226.334	107.863	107.8
233.87	75.9552	77.9137			234.043	106.671	107.275
241.575	76.9797	77.21			241.755	107.855	108.494
249.277	77.0492	77.7616			249.467	108.191	107.849
256.982	76.8802	78.5264			257.172	108.12	108.154
264.684	76.8371	77.5428			264.878	107.458	106.791
272.383	77.8501	78.4147			272.588	108.305	107.878
280.089	76.8392	77.1577			280.298	108.343	108.447
287.797	77.2537	76.6445			288.008	107.962	108.495
295.503	76.3424	77.2281			295.721	107.025	107.895
303.204	77.6652	77.4272			303.429	107.416	107.495
310.908	77.8448	77.7065			311.139	109.693	109.9
318.608	76.5987	77.5054			318.85	108.677	108.838
326.318	76.149	76.8211			326.556	108.977	110.085
334.02	77.4506	78.8241			334.268	108.885	108.234
341.722	78.8318	78.6583			341.978	109.147	108.168
349.422	78.2539	78.0051			349.688	108.992	109.872
357.126	77.5975	77.0053			357.402	111.573	109.943
364.832	75.5513	76.3401			365.113	109.909	109.331
372.535	77.258	78.9816			372.82	111.724	111.739
380.243	76.1143	77.693			380.528	110.772	110.939
387.949	77.076	77.5909			388.237	111.649	111.298
395.654	77.0466	77.5874			395.945	111.008	109.543
403.36	77.9183	76.8617			403.653	110.795	108.952
411.063	77.8309	78.1782			411.359	111.073	108.881
418.764	76.3418	77.7682			419.066	111.361	110.561
426.465	75.9458	76.9641			426.774	110.412	110.315
434.18	76.1602	77.1399			434.486	111.734	109.719
441.885	75.9468	77.8269			442.196	111.141	111.195
449.589	76.4921	76.9357			449.901	112.417	111.757
457.293	78.0525	78.5458			457.611	112.691	111.064
464.997	75.7364	76.2949			465.32	112.923	112.398
475.447	86.8987	86.5469			475.787	111.926	110.113
483.145	95.8315	98.3636			483.5	109.737	109.75
490.853	100.291	101.538			491.212	108.48	110.49
498.562	101.426	101.446			498.918	110.342	109.847
506.263	102.685	103.408			506.63	110.772	111.003
513.967	103.422	103.533			514.341	111.991	109.543
521.67	104.888	104.956			522.054	112.348	112.438
529.37	104.605	103.681			529.764	110.185	108.781
537.072	107.447	108.248			537.475	111.254	110.5
544.772	107.441	107.494			545.181	111.155	109.936
552.472	108.004	108.042			552.893	109.289	109.439
560.176	110.399	109.994			560.604	112.309	110.463
567.883	109.33	109.255			568.316	111.181	109.979
575.586	112.079	110.164			576.029	111.491	110.641
583.292	108.722	109.88			583.737	112.051	112.231
590.993	112.069	111.036			591.444	113.073	110.996
598.695	112.749	113.022			599.155	112.72	111.912
606.395	110.179	110.301			606.867	111.828	110.757
614.095	111.002	110.517			614.571	112.179	111.352
621.798	111.862	111.338			622.281	111.126	110.058
629.5	111.265	111.453			629.993	111.641	112.457
637.204	112.43	113.22			637.704	112.636	109.787
644.905	110.76	111.684			645.416	115.298	113.007
652.615	112.397	111.884			653.123	112.017	111.651
660.32	113.988	112.746			660.832	113.346	112.13
668.024	112.515	112.775			668.54	113.991	113.254
675.728	112.162	112.167			676.252	111.922	110.293
683.433	113.309	111.692			683.96	114.201	114.274
691.135	113.671	113.183			691.668	112.293	110.299
698.84	114.341	114.168			699.368	112.752	111.927
706.543	113.784	113.34			707.077	112.89	110.435
714.253	114.709	112.43			714.789	112.552	112.425
721.952	115.834	114.909			722.499	111.721	111.204
729.654	114.387	114.58			730.204	112.016	110.972
737.362	114.676	114.431			737.914	113.538	110.799
745.066	116.528	116.016			745.626	111.391	110.769
752.769	115.541	116.055			753.337	114.357	112.181
760.471	114.844	113.592			761.045	113.539	112.884
768.183	115.819	114.815			768.748	112.849	112.339
775.885	115.595	114.651			776.454	113.685	112.106

## Sheet: Fig.3b
GB1a/2 receptors
Trace (left) 1 µM peptide / 1 µM GABA					Trace (right) 10 µM peptide / 10 µM GABA					Column graph (left) 1 µM peptide / 1 µM peptide + 1 µM GABA																			Column graph (right) 10 µM peptide / 10 µM peptide + 10 µM GABA
Time (s)	APP17	sc-APP17			Time (s)	APP17	sc-APP17				APP17								sc-APP17											APP17								sc-APP17
0	99.2231	99.3607			0	100.28	100.813			1μM Peptide	0.863823	-1.00985	-2.4159	-1.96321	-0.2333	-0.5208	0.353586	1.27125	-0.34816	0.232039	1.53535	-0.51191	-0.56656	-0.90379	1.02319	0.525107			10μM Peptide	-2.60162	-2.43986	-1.8717	0.27718	0.986359	0.376403	-2.50853	0.461975	-0.81911	-2.89183	-1.07513	0.550424	-0.71744	1.10001	-3.03314	-1.03499
7.709	101.114	99.8987			7.71	102.78	100.652			1μM Peptide + 1 µM GABA	19.4481	22.2682	20.946	19.5112	24.9055	21.3952	23.4144	23.9119	19.1139	21.7067	25.4072	21.7839	25.7154	22.8447	22.1879	25.3498			10μM Peptide + 10 µM GABA	19.3412	24.4843	28.5345	25.3407	20.3614	22.0491	27.4314	22.7899	21.3966	22.3633	30.4056	25.255	20.4865	21.4268	24.5151	23.115
15.416	100.598	99.4861			15.414	100.554	100.443
23.124	99.786	99.4178			23.118	100.44	98.4659
30.838	99.8503	97.9046			30.819	100.779	100.8
38.55	100.552	100.389			38.527	100.232	97.4852
46.257	100.002	100.131			46.227	99.9258	99.9834
53.961	99.9859	99.5549			53.929	100.543	100.397
61.669	98.7493	99.2345			61.628	100.486	100.604
69.383	99.5733	100.406			69.33	99.0275	99.1467
77.09	99.9958	99.4891			77.031	98.2553	100.148
84.8	98.7084	100.689			84.737	99.8538	100.348
92.509	100.313	101.15			92.453	99.3468	100.697
100.214	99.5319	100.809			100.167	100.53	100.377
107.916	99.5676	99.8733			107.869	99.5964	99.6221
115.628	101.41	99.8356			115.569	99.1241	99.0862
123.338	100.142	100.85			123.27	100.139	99.5614
131.046	99.8618	99.6918			130.968	99.468	100.059
138.756	100.551	99.7754			138.673	100.204	100.451
146.463	101.047	100.544			146.375	98.0081	101.11
154.174	99.4365	101.508			154.077	100.426	99.7484
164.645	102.508	99.3856			164.538	98.0726	98.2979
172.352	101.37	99.2455			172.239	99.195	98.974
180.059	100.832	101.347			179.942	98.5286	99.8675
187.767	100.752	99.7629			187.646	98.4933	99.4346
195.477	99.4676	99.8894			195.349	98.825	101.384
203.184	100.918	99.8649			203.051	99.7187	99.2024
210.897	101.348	99.3137			210.755	98.3516	101.381
218.606	100.367	101.581			218.456	98.9742	100.829
226.312	102.063	100.909			226.17	98.5188	100.795
234.021	101.225	101.466			233.874	98.4338	101.602
241.733	100.582	100.339			241.576	99.9334	99.963
249.441	100.559	99.341			249.275	99.6946	99.3104
257.148	101.813	100.555			256.974	100.075	101.774
264.848	100.884	101.024			264.674	99.2588	99.8792
272.557	101.486	100.827			272.39	99.2358	101.368
280.273	101.823	100.156			280.089	98.6463	98.9989
287.982	101.052	101.255			287.793	99.3177	99.9791
295.694	101.479	100.552			295.499	99.0174	101.144
303.402	102.643	101.189			303.203	99.3123	100.903
311.109	102.656	99.1349			310.906	98.6727	100.319
318.819	102.542	99.8424			318.611	99.3136	101.225
326.532	101.689	101.505			326.311	99.372	101.319
334.243	101.2	100.85			334.007	100.308	101.811
341.946	102.86	102.013			341.708	99.0754	100.75
349.656	102.527	100.521			349.407	99.2275	100.3
357.369	104.202	99.6475			357.106	98.8888	100.062
365.083	102.46	101.479			364.812	100.436	101.524
372.789	102.715	101.085			372.518	97.7043	100.003
380.498	102.874	102.145			380.219	98.6593	102.064
388.2	101.673	100.783			387.925	99.1081	102.362
395.911	102.129	101.722			395.626	98.8493	102.847
403.625	102.755	101.504			403.324	100.253	101.584
411.335	102.425	102.368			411.029	99.4301	100.39
419.039	101.571	100.669			418.731	99.8955	101.062
426.75	103.534	100.329			426.432	99.3132	101.068
434.46	102.982	100.654			434.136	99.7958	101.451
442.168	104.274	102.439			441.844	99.5166	102.264
449.878	102.968	100.624			449.551	98.6236	100.23
457.587	102.599	102.059			457.255	100.3	99.2167
465.292	103.656	101.416			464.959	99.6115	102.272
475.765	90.4393	87.3391			475.412	82.2604	84.5466
483.476	85.5298	83.7614			483.117	79.1032	80.2757
491.186	83.2028	82.8104			490.815	79.2491	79.2967
498.9	83.1107	80.757			498.521	78.3101	78.4982
506.607	82.3712	80.1915			506.229	78.5482	77.8752
514.316	80.8263	80.3647			513.931	77.8705	78.7366
522.026	80.0492	78.6739			521.633	77.8223	77.541
529.736	77.6859	78.8332			529.333	78.44	79.6096
537.447	77.7802	80.3027			537.038	77.1219	78.7796
545.153	80.3202	79.8694			544.744	77.2529	77.7291
552.859	80.5714	79.1429			552.445	78.315	77.6603
560.569	81.4663	79.2256			560.144	78.6019	78.4961
568.278	80.7415	77.3965			567.851	76.9397	79.8157
575.988	79.9695	78.4689			575.556	78.3503	77.9183
583.696	82.5884	78.8256			583.26	77.5351	77.3442
591.404	82.053	79.0873			590.961	78.2451	78.9486
599.116	83.01	78.9008			598.667	78.4315	78.1508
606.827	80.8421	79.6852			606.367	77.8368	78.6446
614.535	81.5868	80.6173			614.077	77.3524	79.3957
622.247	79.7455	80.3402			621.78	78.0076	77.417
629.957	80.1746	80.5152			629.484	76.8106	77.1992
637.674	83.1769	79.2387			637.185	76.7807	77.9578
645.39	81.72	78.8571			644.891	76.7041	78.1605
653.096	82.1686	79.1197			652.595	77.3739	78.0189
660.801	82.0205	80.1946			660.302	76.9227	77.9957
668.507	80.3073	80.4377			668.01	77.213	77.833
676.216	80.5779	76.6086			675.712	75.978	78.2585
683.924	80.9035	80.1149			683.414	77.8049	78.1042
691.644	80.9064	79.3374			691.119	76.9436	77.692
699.348	81.4251	78.5185			698.824	76.1636	77.1528
707.054	82.8535	79.0859			706.533	75.5974	78.1307
714.763	81.0641	79.0318			714.234	75.309	78.4934
722.471	79.8199	80.7943			721.941	75.7062	77.4723
730.18	82.5696	79.8248			729.648	76.6271	77.7494
737.89	82.0637	79.8464			737.352	77.2882	76.4749
745.599	81.3418	79.1582			745.058	75.6496	76.7911
753.307	80.5964	80.1099			752.762	75.8933	76.0785
761.017	83.2302	78.1986			760.467	75.3219	77.5914
768.727	81.5789	78.4289			768.171	76.5409	76.7634
776.432	80.1097	77.845			775.878	76.1108	76.9767

## Sheet: Fig.3c
GB1a/2 receptors + APP (cis)
Trace (left) 1 µM peptide / 1 µM GABA					Trace (right) 10 µM peptide / 10 µM GABA					Column graph (left) 1 µM peptide / 1 µM peptide + 1 µM GABA																			Column graph (right) 10 µM peptide / 10 µM peptide + 10 µM GABA
Time (s)	APP17	sc-APP17			Time (s)	APP17	sc-APP17				APP17								sc-APP17											APP17								sc-APP17
0	100.029	100.045			0	101.539	100.34			1μM Peptide	1.07438	0.164491	-1.86186	-1.31057	0.073476	0.267932	-0.25918	1.43903	0.579527	1.24653	2.28923	-0.61499	-0.38811	-0.44148	0.55376	0.525107			10μM Peptide	-2.43989	-1.45956	-1.18502	0.86869	1.68815	1.73577	-1.50424	1.31024	-0.58969	-2.70861	-0.28071	1.24653	0.202939	1.63001	-3.20713	-0.45579
7.709	100.291	99.6809			7.712	101.79	99.0146			1μM Peptide + 1 µM GABA	18.3254	19.8396	18.6563	16.7316	22.4386	18.2928	23.912	23.4395	18.7315	16.9411	23.9443	18.5524	23.046	18.565	23.0058	25.3498			10μM Peptide + 10 µM GABA	19.7773	20.1775	28.2708	21.4063	18.2524	20.5272	25.1198	21.3586	20.1754	19.6074	29.0763	21.8874	18.3044	20.4759	22.6326	21.1232
15.416	100.962	100.383			15.424	100.27	99.5105
23.124	99.2148	100.159			23.13	98.7576	99.7071
30.838	99.9787	98.6202			30.837	100.311	98.7257
38.55	100.222	100.23			38.546	99.3394	99.1594
46.257	99.8628	100.131			46.255	99.3497	98.9195
53.961	99.0521	100.261			53.961	100.79	99.5831
61.669	99.655	99.5655			61.669	99.7026	99.8878
69.383	100.878	99.4404			69.372	100.803	100.644
77.09	100.461	99.0194			77.084	100.508	101.285
84.8	98.9082	99.2341			84.794	99.7711	98.4972
92.509	99.9767	101.317			92.506	100.361	100.257
100.214	99.493	100.553			100.217	100.23	99.1272
107.916	100.395	99.5909			107.924	99.3488	101.338
115.628	100.959	99.6559			115.635	99.2876	100.776
123.338	99.2297	101.055			123.344	99.2862	102.974
131.046	99.7844	100.246			131.052	99.7837	99.7965
138.756	101.098	99.4942			138.761	99.0164	98.5942
146.463	99.7528	100.176			146.479	99.3372	100.421
154.174	99.7957	101.14			154.189	100.418	101.443
164.645	100.256	98.8382			164.663	98.8531	100.529
172.352	101.347	98.5836			172.37	98.5841	101.787
180.059	99.7451	99.9312			180.077	100.639	97.6815
187.767	99.9089	99.1845			187.785	98.2337	101.495
195.477	98.2426	99.6514			195.493	99.1938	101.042
203.184	101.545	99.5993			203.203	99.5166	98.5007
210.897	100.324	99.6948			210.912	100.621	99.1009
218.606	99.9817	100.427			218.622	99.4271	98.822
226.312	100.404	100.878			226.329	99.4523	101.697
234.021	100.53	101.072			234.037	99.4925	100.641
241.733	99.3592	100.75			241.745	100.399	101.655
249.441	100.161	98.83			249.456	101.225	101.117
257.148	101.155	100.18			257.166	99.5554	101.299
264.848	100.743	100.779			264.872	99.4735	100.422
272.557	101.299	101.12			272.574	100.501	100.803
280.273	101.977	100.437			280.281	100.385	100.787
287.982	100.488	100.812			287.991	100.57	101.981
295.694	100.553	99.1202			295.702	100.026	99.8591
303.402	101.476	100.372			303.413	101.446	99.8612
311.109	102.411	98.1535			311.123	99.4039	101.862
318.819	101.293	99.9785			318.828	100.59	101.141
326.532	101.326	100.441			326.54	102.272	102.961
334.243	101.428	101.465			334.25	101.493	103.064
341.946	102.369	100.501			341.956	100.937	100.376
349.656	102.019	100.646			349.663	100.528	103.53
357.369	102.57	100.699			357.375	101.53	102.391
365.083	102.05	101.146			365.085	100.975	105.101
372.789	100.878	100.293			372.795	101.67	104.406
380.498	102.187	101.653			380.506	99.543	101.838
388.2	101.882	101.807			388.214	101.851	105.589
395.911	102.466	101.828			395.925	99.3118	102.965
403.625	100.54	100.616			403.637	100.721	104.053
411.335	102.885	101.472			411.345	100.043	102.342
419.039	101.249	101.342			419.052	100.662	104.188
426.75	103.063	100.674			426.762	101.526	104.727
434.46	103.308	102.008			434.472	102.314	102.091
442.168	104.037	101.842			442.184	101.883	102.464
449.878	103.707	100.793			449.894	101.875	103.185
457.587	102.031	102.062			457.603	100.796	102.686
465.292	103.207	101.076			465.309	101.436	103.445
475.765	91.8293	88.9881			475.775	89.2483	91.8157
483.476	88.2941	87.3329			483.482	83.8968	85.9651
491.186	84.5716	85.0397			491.192	83.3028	83.5779
498.9	86.7281	83.0143			498.899	82.2716	81.7713
506.607	85.0881	83.673			506.608	79.7632	80.3783
514.316	84.2345	82.9964			514.317	80.4607	82.9318
522.026	84.2491	83.1285			522.024	81.4097	81.1484
529.736	82.5967	83.3475			529.739	80.2114	81.4798
537.447	82.2448	84.6641			537.451	80.0799	82.2218
545.153	84.6314	81.807			545.165	81.115	81.6859
552.859	81.9178	82.2784			552.876	79.9686	83.0048
560.569	83.6849	82.0354			560.586	80.3717	82.7301
568.278	82.855	82.3745			568.296	81.0251	81.9547
575.988	82.385	82.7544			576.008	81.9149	83.3331
583.696	85.0816	83.6913			583.72	79.7948	83.9673
591.404	83.9662	83.7213			591.43	80.66	85.2793
599.116	85.2475	82.4633			599.138	80.1795	83.9853
606.827	84.9546	84.5645			606.847	80.272	82.6667
614.535	84.4621	83.3545			614.557	81.0445	82.6261
622.247	83.4747	82.6508			622.268	80.367	82.2042
629.957	82.2105	83.416			629.972	79.6675	82.1046
637.674	84.2562	83.0255			637.678	81.7699	81.3916
645.39	83.6002	82.1567			645.396	80.0205	84.3559
653.096	84.147	81.5551			653.11	79.3788	82.5106
660.801	83.3553	83.3458			660.818	81.297	84.7654
668.507	83.0902	83.9525			668.527	80.1988	82.7071
676.216	83.1544	81.1563			676.234	80.2147	83.9728
683.924	84.184	82.8311			683.944	81.6456	83.6081
691.644	83.2827	83.4029			691.658	81.8123	82.7568
699.348	83.7065	80.8036			699.367	80.6545	81.5958
707.054	84.9399	82.825			707.069	82.91	82.6745
714.763	82.6031	81.8992			714.773	80.9547	82.5315
722.471	82.4595	83.6911			722.483	81.6066	82.6204
730.18	85.0866	82.4091			730.188	80.4147	82.8381
737.89	83.4838	82.6359			737.895	79.5356	83.1325
745.599	84.06	83.1649			745.606	80.429	82.5234
753.307	83.393	81.7979			753.313	79.8523	82.8167
761.017	84.6187	81.6717			761.021	79.2778	84.3605
768.727	83.2898	81.4832			768.74	80.9225	84.3284
776.432	82.8371	81.6152			776.452	79.3242	82.9304

## Sheet: Fig.3d
Trace (left) 1 µM peptide / 1 µM GABA					Trace (right) 10 µM peptide / 10 µM GABA					Column graph (left) 1 µM peptide / 1 µM peptide + 1 µM GABA																			Column graph (right) 10 µM peptide / 10 µM peptide + 10 µM GABA
Time (s)	APP17	scAPP17			Time (s)	APP17	scAPP17				APP17								sc-APP17											APP17								scAPP17
0	100.825	100.648			0	99.0081	101.652			1μM Peptide	-0.25569	-0.65018	1.85651	1.40427	-0.38599	2.26745	0.141758	-2.16259	0.95353	2.22036	1.3118	0.11221	1.20892	-0.14843	-1.64054	1.29619			10μM Peptide	2.61415	1.99319	-2.93641	-0.2836	-1.11149	1.27136	0.364661	1.22205	2.81024	0.745908	1.32816	-3.91516	-2.82532	1.47486	0.308608	0.652596
7.709	101.112	99.3149			7.709	101.183	100.059			1μM Peptide + 1 µM GABA	34.0439	33.1256	32.0844	28.7093	34.2497	28.1548	21.2475	24.0851	28.4913	29.117	35.039	36.0826	31.1029	34.8672	22.574	23.7393			10μM Peptide + 10 µM GABA	28.7544	27.8543	35.8111	29.2207	23.5042	27.7737	30.7764	31.6185	27.2044	29.8601	34.8475	29.6983	24.2512	25.0869	34.6888	29.4503
15.416	98.3438	101.437			15.416	99.2028	101
23.124	100.061	100.35			23.124	101.057	100.285
30.838	100.185	100.727			30.838	99.1967	100.414
38.55	99.0043	98.8765			38.55	101.903	99.707
46.257	99.1313	99.5298			46.257	101.539	99.496
53.961	100.696	99.8025			53.961	98.09	99.5398
61.669	100.658	102.178			61.669	101.11	99.6853
69.383	100.154	99.7931			69.383	99.5898	98.6102
77.09	101.064	98.2545			77.09	101.292	100.79
84.8	99.3991	101.426			84.8	100.934	101.327
92.509	99.751	99.9203			92.509	99.813	100.272
100.214	100.536	100.495			100.214	101.686	99.8483
107.916	100.005	99.4484			107.916	99.1152	100.765
115.628	99.8561	99.9352			115.628	101.173	99.7262
123.338	100.525	100.119			123.338	99.5828	96.2685
131.046	99.2482	97.2627			131.046	97.7353	100.856
138.756	99.5834	100.311			138.756	99.5339	101.709
146.463	99.8743	100.397			146.463	97.8579	100.896
154.174	100.812	100.423			154.174	98.4054	98.7472
164.645	98.1799	98.0618			164.645	98.2902	96.5729
172.352	99.5487	99.4227			172.352	96.9228	98.2101
180.059	99.4562	98.4538			180.059	100.519	99.424
187.767	97.7012	99.6228			187.767	98.0547	98.4783
195.477	98.3194	99.6572			195.477	97.1703	97.9943
203.184	97.9721	98.4485			203.184	99.4387	97.164
210.897	98.7505	99.4111			210.897	99.3826	98.9599
218.606	100.839	98.7134			218.606	99.9342	97.99
226.312	98.4562	99.2267			226.312	99.8534	99.172
234.021	100.369	99.1606			234.021	98.8672	97.1068
241.733	99.4387	100.433			241.733	97.6176	99.179
249.441	100.167	99.776			249.441	99.1157	99.5956
257.148	100.28	101.032			257.148	99.0858	97.3097
264.848	99.4306	97.6886			264.848	100.161	99.4115
272.557	100.436	99.345			272.557	97.7298	100.533
280.273	100.499	98.1175			280.273	99.6354	98.4525
287.982	100.648	99.3933			287.982	100.369	98.5153
295.694	98.6829	100.591			295.694	100.909	99.0277
303.402	99.3449	97.0613			303.402	99.3616	98.7614
311.109	101.23	100.005			311.109	100.154	101.02
318.819	99.2685	99.0739			318.819	100.868	98.1674
326.532	99.7143	98.4753			326.532	98.5024	99.5707
334.243	100.428	99.6193			334.243	101.434	99.8626
341.946	101.785	101.78			341.946	99.5823	98.7866
349.656	99.0757	99.776			349.656	98.9903	99.6403
357.369	100.337	98.5012			357.369	99.3261	99.7149
365.083	100.373	99.8395			365.083	100.794	100.391
372.789	99.8128	101.249			372.789	98.7151	99.675
380.498	100.539	99.3154			380.498	100.815	98.2424
388.2	100.812	100.985			388.2	99.6338	99.8344
395.911	99.297	101.409			395.911	100.811	99.0061
403.625	99.9219	100.413			403.625	101.277	97.8564
411.335	100.371	98.795			411.335	98.1033	99.743
419.039	100.507	100.816			419.039	100.771	96.7045
426.75	98.9618	99.1071			426.75	102.815	99.6604
434.46	100.936	102.079			434.46	100.093	100.787
442.168	99.3322	99.0519			442.168	100.107	99.0732
449.878	99.6396	99.3205			449.878	100.276	98.7278
457.587	98.9884	100.865			457.587	100.547	98.3964
465.292	100.573	100.029			465.292	101.383	100.914
475.765	84.0824	85.8716			475.765	83.0142	82.9958
483.476	75.9936	75.5472			483.476	78.9745	75.5656
491.186	72.9643	72.8164			491.186	75.8127	72.778
498.9	70.7371	66.6454			498.9	73.7939	73.5441
506.607	68.7987	67.2437			506.607	74.6061	70.637
514.316	67.0217	65.1233			514.316	72.2503	71.066
522.026	66.8669	66.8745			522.026	72.0812	69.7775
529.736	67.5718	64.4337			529.736	73.7664	70.7695
537.447	67.2454	66.36			537.447	72.4186	70.3012
545.153	70.0812	65.7133			545.153	72.6499	71.3889
552.859	64.5281	68.0431			552.859	71.3821	70.9489
560.569	66.8132	65.0972			560.569	73.9853	70.2237
568.278	67.1102	66.2003			568.278	72.6232	69.8658
575.988	67.8182	63.706			575.988	73.5157	69.6195
583.696	66.703	65.8692			583.696	71.8181	69.7533
591.404	66.6957	64.3651			591.404	71.2267	69.6512
599.116	66.1342	65.2749			599.116	72.0788	71.2369
606.827	66.0419	66.3173			606.827	72.1278	73.3171
614.535	65.4341	65.8116			614.535	72.1889	71.4709
622.247	66.5162	64.2403			622.247	72.5276	68.9448
629.957	67.5629	64.0332			629.957	70.9471	70.7192
637.674	65.4237	63.0279			637.674	71.2839	72.4828
645.39	65.4506	63.1591			645.39	72.3907	69.7569
653.096	65.4788	63.7188			653.096	70.854	71.3666
660.801	67.0246	63.7023			660.801	71.7678	68.5822
668.507	66.7649	66.1231			668.507	68.2766	69.4402
676.216	64.8634	63.2804			676.216	72.2086	69.6255
683.924	65.6436	66.0436			683.924	72.0174	67.7608
691.644	64.7522	64.6504			691.644	70.579	70.6673
699.348	65.6256	62.6414			699.348	71.8428	68.6533
707.054	66.4143	63.5322			707.054	70.763	68.3446
714.763	65.2121	66.9116			714.763	72.8469	68.7623
722.471	65.8476	63.82			722.471	72.011	69.9941
730.18	64.3012	63.1398			730.18	73.2303	70.4654
737.89	66.4562	63.6188			737.89	70.177	68.9419
745.599	62.8691	63.1317			745.599	71.1954	70.4563
753.307	63.4699	63.1891			753.307	70.9737	69.2539
761.017	61.6906	65.8611			761.017	70.356	65.8741
768.727	66.5905	62.636			768.727	69.102	67.8971
776.432	64.3894	65.2279			776.432	69.4363	70.4484
