# Supplementary material for: Soluble amyloid-β precursor peptide does not regulate GABAB receptor activity
Source: eLife. 2023 Jan 23;12:e82082. doi: 10.7554/eLife.82082 (PMC9917443; doi:10.7554/eLife.82082)
Supplement: Figure 4—source data 1. [file elife-82082-fig4-data1.xlsx]

## Sheet: Fig.4a
Trace (top) 10 µM GABA / 10 µM CGP					Trace (bottom) 10 µM CGP / 10 µM GABA
Time [s]	GB1a/2	GB1a/2 + APP			Time [s]	GB1a/2	GB1a/2 + APP
0	102.069	102.545			0	100.203	103.405
3.739	100.355	101.548			3.738	98.7814	102.038
7.473	98.875	101.741			7.473	100.111	104.025
11.214	100.374	102			11.214	100.303	101.709
14.949	100.107	102.006			14.949	99.1907	102.719
18.686	100.537	100.868			18.69	98.9178	102.088
22.421	100.439	101.082			22.425	101.113	102.571
26.159	100.868	102.505			26.16	99.0472	100.707
29.894	102.135	100.015			29.897	101.192	100.97
33.641	101.054	99.0819			33.632	100.918	99.5064
37.374	99.0247	101.628			37.37	98.8977	101.438
41.112	100.384	99.4826			41.108	100.028	98.9133
44.856	99.1072	99.46			44.846	99.7655	99.263
48.589	99.7147	100.338			48.582	99.5225	101.653
52.332	100.967	100.212			52.322	101.509	99.593
56.069	99.6886	99.083			56.057	99.4639	100.136
59.811	100.84	101.334			59.798	100.451	99.7414
63.545	101.36	98.9782			63.533	100.445	100.023
67.286	99.3421	100.051			67.271	100.049	100.512
71.023	99.5716	99.4342			71.009	99.8697	98.7285
77.153	100.433	98.6692			77.137	99.1131	98.9071
80.893	100.384	98.135			80.879	99.9622	96.3511
84.63	100.855	100.689			84.616	99.1174	96.6426
88.378	100.786	101.804			88.355	97.0925	96.5992
92.114	105.291	103.353			92.092	95.9143	94.781
95.854	105.32	104.306			95.829	92.7297	94.0294
99.593	107.717	105.795			99.566	90.1209	91.3981
103.33	109.693	108.967			103.304	87.1037	88.9451
107.067	111.051	109.622			107.043	82.8148	85.68
110.805	113.476	112.655			110.78	80.2682	81.6803
114.543	115.908	114.348			114.517	76.8399	77.4926
118.278	116.022	113.399			118.253	72.008	75.255
122.017	117.281	117.47			121.993	68.2348	72.0006
125.752	118.533	118.99			125.728	64.6086	68.3833
129.492	119.512	118.311			129.471	61.1212	64.7628
133.229	120.399	121.243			133.21	58.3705	61.5868
136.97	122.801	124.256			136.95	55.7576	59.2365
140.708	123.359	123.844			140.694	54.1316	57.6741
144.444	124.613	122.338			144.432	51.838	55.629
148.181	123.898	123.831			148.167	50.0048	53.919
151.923	127.943	128.074			151.905	49.0925	52.758
155.659	127.833	127.514			155.641	47.5654	51.8855
159.394	126.081	127.643			159.379	46.5127	51.1024
163.131	124.927	127.61			163.115	45.667	49.2827
166.868	129.172	128.617			166.854	45.0409	48.8717
170.605	127.51	129.249			170.595	43.2207	48.1868
174.338	129.766	130.606			174.335	42.8364	47.2283
178.078	131.392	130.191			178.082	42.4208	46.1777
181.818	132.019	130.217			181.82	41.2234	46.5238
185.558	130.194	132.097			185.558	41.305	45.9502
189.295	130.949	133.505			189.3	41.2052	44.6177
193.04	132.423	132.117			193.042	40.7965	44.0204
196.777	131.826	132.802			196.779	40.2195	43.7378
200.515	132.831	135.127			200.518	39.9568	44.1241
204.251	133.375	132.801			204.255	39.7323	43.6307
207.988	132.744	136.559			207.997	39.1572	43.4437
211.725	132.219	136.03			211.73	39.8075	43.0133
215.458	131.806	137.995			215.467	38.7755	43.0378
219.194	133.585	135.185			219.204	38.7137	41.9786
222.933	134.488	135.199			222.939	37.4952	41.8825
226.664	134.109	137.095			226.681	37.5298	41.1843
230.404	133.189	137.205			230.417	37.321	40.9401
234.146	133.811	138.489			234.159	37.3751	41.888
237.881	136.014	137.387			237.897	38.035	40.5342
241.626	136.791	138.867			241.639	37.0504	41.3092
245.363	135.997	138.189			245.372	37.0596	41.6767
249.105	136.3	137.168			249.114	36.8112	40.8648
252.845	137.213	138.576			252.848	36.7714	40.8726
256.585	137.794	140.264			256.588	37.1025	40.4937
260.327	134.99	138.162			260.324	36.3063	40.2133
264.065	137.746	139.246			264.062	36.6332	40.5844
267.802	137.033	140.486			267.797	36.0794	40.1367
271.544	136.917	140.41			271.535	36.549	40.9314
275.279	138.52	137.097			275.271	36.4484	39.2245
279.014	139.596	139.645			279.009	36.2946	39.4164
282.751	137.204	142.151			282.745	35.5371	40.4395
286.487	137.232	138.462			286.482	34.9929	38.9834
290.229	138.9	141			290.223	36.0035	39.0579
293.962	139.589	140.881			293.96	36.8748	40.5876
297.702	139.629	139.093			297.697	36.4839	38.7779
301.438	137.936	138.669			301.437	36.032	38.5794
305.18	141.046	138.541			305.177	35.8576	38.3425
308.915	138.77	143.15			308.914	35.2335	39.1733
312.652	139.898	141.595			312.654	34.9789	38.4261
316.389	139.704	140.909			316.389	35.5596	38.6231
320.13	139.676	139.926			320.128	35.0623	38.5888
323.865	141.726	141.682			323.861	35.7815	39.0017
327.601	139.708	141.781			327.599	35.3952	37.5482
331.337	142.435	142.433			331.337	35.5869	39.433
335.074	140.514	141.332			335.073	35.2871	38.3504
338.812	141.219	141.112			338.817	35.2829	37.8989
342.546	140.194	145.209			342.55	34.7175	38.6146
346.285	141.196	144.286			346.292	35.4969	39.0511
350.023	142.406	142.744			350.032	34.9593	39.0774
353.768	141.429	142.172			353.77	35.4828	36.8092
357.503	143.352	144.272			357.507	35.7334	38.0592
361.242	142.947	141.56			361.248	35.2904	38.0109
364.975	142.508	143.19			364.983	35.7012	37.3104
368.711	142.569	144.103			368.726	35.3941	38.7081
372.447	142.97	144.586			372.463	35.3223	37.7918
376.183	143.583	142.44			376.201	35.4702	37.7561
379.92	143.335	143.112			379.939	35.2982	37.6657
383.658	142.018	144.036			383.675	35.7847	38.8185
387.396	144.92	144.399			387.414	35.3344	37.2525
391.134	143.555	143.322			391.148	34.8845	37.3509
394.87	142.833	142.812			394.89	35.2896	36.8899
398.605	145.171	142.971			398.63	34.9616	38.0745
402.348	142.622	143.808			402.372	35.4928	37.343
406.085	143.452	143.944			406.111	34.7111	37.1346
409.827	143.491	144.364			409.852	35.8445	37.9916
413.563	143.452	143.31			413.591	34.7448	37.5061
417.302	144.459	144.978			417.331	34.8765	36.9772
421.039	144.696	143.554			421.073	34.8462	37.4258
424.779	142.299	145.713			424.813	35.0031	37.6905
428.516	143.016	143.817			428.551	34.5515	36.5872
432.257	143.987	144.321			432.289	35.168	37.9102
435.996	147.037	144.452			436.026	34.9798	36.3523
439.731	146.314	143.173			439.761	35.5262	36.4209
443.468	146.356	145.545			443.5	35.1793	37.3352
447.205	145.08	145.548			447.238	34.9717	36.9707
453.347	143.613	144.767			453.386	34.7495	38.107
457.087	145.437	144.225			457.122	34.7039	37.6004
460.826	143.061	141.644			460.861	35.11	36.357
464.564	142.121	139.205			464.597	35.4771	36.9808
468.306	136.734	135.474			468.335	34.6664	37.3242
472.047	129.135	129.405			472.075	35.549	37.3086
475.782	124.305	121.289			475.812	35.7476	37.3207
479.522	112.55	112.594			479.553	34.9711	37.0171
483.26	102.742	102.938			483.29	35.1746	36.9141
487.001	94.0069	93.9558			487.034	34.5126	36.543
490.736	85.8383	87.21			490.774	34.938	36.54
494.478	77.3158	80.7585			494.514	34.9374	37.5606
498.215	71.9434	72.8259			498.253	35.5975	36.3962
501.961	64.0028	67.7547			501.994	34.2889	36.9732
505.697	60.9547	64.067			505.729	34.7189	36.504
509.435	56.2258	59.2315			509.47	34.8897	36.7512
513.173	53.203	56.143			513.204	34.7412	36.2232
516.911	50.9658	53.1156			516.941	35.6751	36.1688
520.649	47.444	51.9879			520.678	34.6683	37.3575
524.386	48.4305	51.2528			524.417	35.7195	37.2445
528.126	45.0906	50.1763			528.158	34.8396	37.3212
531.864	43.8638	46.7311			531.894	35.1899	37.1023
535.604	43.2735	46.1895			535.633	35.7837	36.7115
539.343	42.2525	45.1126			539.372	35.0055	37.4792
543.084	41.4875	43.9569			543.115	35.7948	35.8375
546.823	41.2377	44.5679			546.854	35.2481	37.288
550.56	39.3569	43.0568			550.595	35.9975	37.3306
554.297	40.3085	43.0504			554.33	35.4206	37.2985
558.037	39.5351	42.4177			558.071	35.8665	37.7582
561.776	38.7558	42.0635			561.806	34.9734	36.9697
565.515	39.3147	41.5911			565.544	35.5848	36.5294
569.254	38.8894	40.0779			569.284	36.1741	37.7112
572.991	37.6835	40.0152			573.023	36.0706	37.6626
576.721	38.1366	39.0881			576.761	35.9354	37.2842
580.46	37.5289	40.4507			580.499	35.8816	37.038
584.199	37.2217	40.2831			584.239	36.102	37.1519
587.935	36.9632	40.5261			587.972	36.2994	37.234
591.679	37.0693	39.2394			591.715	35.8998	36.9283
595.414	36.8956	39.3255			595.45	35.4234	36.4549
599.154	36.599	39.0664			599.191	36.2737	36.0987
602.892	36.3091	38.8118			602.926	34.9466	38.1586
606.632	36.4694	38.7333			606.664	35.4588	36.2739
610.368	35.6776	37.8612			610.4	35.7774	37.5836
614.105	35.1279	38.638			614.137	35.6994	37.1835
617.843	34.7214	38.619			617.873	36.1567	37.7371
621.582	35.4103	38.1103			621.611	35.6107	36.946
625.317	35.0594	38.0047			625.347	36.5048	37.3868
629.055	34.9771	37.5521			629.083	36.4787	36.68
632.791	35.0621	37.6147			632.819	36.2115	37.3115
636.528	34.3641	38.9673			636.557	35.752	37.4909
640.271	35.0669	36.7301			640.298	36.2788	36.3122
644.008	35.4757	37.2165			644.034	35.5167	37.0728
647.748	34.2927	37.0776			647.77	36.8746	38.0177
651.486	34.6361	36.514			651.508	35.6949	36.8062
655.225	34.4207	37.184			655.248	36.4269	36.7928
658.961	34.7082	35.7744			658.987	36.3559	37.802
662.7	33.7291	36.188			662.726	36.9335	37.2342
666.436	34.3649	36.3528			666.463	35.9595	37.0343
670.178	34.7879	36.2396			670.204	36.6585	36.4963
673.913	33.5206	35.8676			673.941	37.2009	37.7529
677.651	34.9819	35.4279			677.677	37.4748	36.6589
681.389	34.2586	35.8526			681.415	36.6798	37.4062
685.125	33.3063	37.6063			685.152	37.0692	37.148
688.862	34.9966	36.999			688.891	37.9277	37.5713
692.599	34.8468	38.2068			692.627	37.6273	37.6422
696.342	35.0051	36.6643			696.368	37.3521	36.9771
700.075	34.7193	36.7232			700.102	37.0661	36.7815
703.818	33.6834	37.6623			703.84	37.3606	37.1387
707.553	33.045	38.2009			707.577	36.7238	37.0239
711.294	34.0484	35.2613			711.318	37.7695	37.6301
715.031	32.9127	35.2027			715.057	37.5995	35.8363
718.767	34.8641	36.1552			718.798	37.8396	36.8817
722.505	35.3766	34.6626			722.535	37.6165	38.0591
726.245	33.1122	36.6756			726.275	37.6435	37.328
729.986	34.3389	34.7168			730.017	37.4233	37.5661
733.723	34.3938	36.747			733.754	38.1083	37.7175
737.46	34.6111	35.8133			737.488	37.7139	37.2977
741.196	34.0581	36.7958			741.226	37.2947	36.5213
744.93	34.2925	36.0522			744.962	37.3954	37.4345
748.666	33.5502	36.7996			748.702	37.2801	37.3066
752.41	33.7443	36.2846			752.44	36.924	37.6173
756.145	34.2642	37.4528			756.177	37.7267	36.7642
759.883	34.088	36.3439			759.922	37.043	36.3846
763.623	33.9771	36.5221			763.661	37.9113	37.0764
767.363	34.1428	35.4133			767.401	38.3196	38.0999
771.101	34.8827	35.9051			771.139	38.0051	37.1255
774.841	33.3367	35.5778			774.876	38.086	38.013
778.578	35.4355	35.6425			778.615	39.0444	36.7388
782.315	33.1175	36.0516			782.353	37.9898	36.9837
786.052	34.929	35.9206			786.09	38.5699	36.8923
789.79	33.7511	35.8918			789.826	38.2192	37.5465
793.528	33.8999	35.204			793.562	37.198	37.3079
797.263	33.4894	35.2391			797.301	38.9957	37.3576
801.002	34.2294	35.75			801.04	38.0166	38.07
804.737	34.7718	35.6007			804.777	38.0227	38.2526
808.479	34.2262	34.0063			808.522	38.0782	36.4142
812.219	35.1427	36.6072			812.261	37.9701	37.5021
815.959	34.474	34.8087			816.002	38.5046	37.6383
819.698	33.5563	36.6651			819.74	37.8004	37.4723
823.439	33.8588	34.2607			823.478	39.3809	37.5222

## Sheet: Fig.4b
GB1a/2
Trace 10 µM peptide / 10 µM GABA					Column graph 10 µM peptide / 10 µM peptide + 10 µM GABA
Time (s)	APP17	sc-APP17				APP17								sc-APP17
0	99.3757	98.8735			10 μM Peptide	4.67924	0.595207	2.77997	-2.58439	-0.33365	-1.29116	1.23262	3.26376	-0.65364	-1.85633	1.04768	0.389338	1.38074	-0.69406	-0.7577	0.264317
3.739	99.3122	98.8242			10 μM Peptide + 10 µM GABA	61.1037	49.3222	36.3931	48.9114	19.2892	39.5727	54.3117	44.3029	50.0842	75.858	26.5615	32.0702	35.2882	25.4186	86.601	27.7198
7.475	99.7963	99.1371
11.213	99.399	99.9259
14.951	99.9919	98.5028
18.688	99.0353	98.9455
22.43	97.9144	99.1542
26.168	100.626	98.4218
29.907	99.6355	99.0946
33.644	100.681	102.101
37.388	100.086	99.6509
41.124	99.8255	100.056
44.861	98.6188	99.5767
48.601	99.4493	99.5436
52.342	100.605	100.165
56.077	99.2721	99.952
59.82	100.236	99.9353
63.555	100.405	99.8963
67.293	100.561	100.356
71.029	100.942	100.868
77.157	99.8045	100.406
80.905	99.3941	101.21
84.64	99.55	100.357
88.376	99.6555	100.247
92.116	100.06	100.562
95.851	100.552	101.743
99.589	99.2255	100.439
103.328	100.293	99.833
107.071	100.85	100.883
110.809	100.064	100.668
114.549	99.2481	100.364
118.282	99.7766	100.819
122.021	99.8318	101.376
125.754	100.017	100.128
129.49	100.439	101.167
133.228	99.7716	100.566
136.968	99.5167	99.7534
140.704	100.442	100.225
144.441	99.0886	100.383
148.178	100.076	99.5973
151.915	99.4353	100.741
155.655	100.248	100.185
159.39	100.647	101.911
163.127	101.744	100.389
166.864	99.3195	101.107
170.607	100.066	100.855
174.346	100.056	100.354
178.088	99.5557	100.51
181.826	100.503	101.02
185.566	99.7508	101.516
189.301	99.7831	101.729
193.038	99.3941	100.753
196.775	99.6627	101.461
200.514	99.8021	101.725
204.251	100.391	101.167
207.987	100.397	100.6
211.729	99.1415	101.288
215.468	99.1749	101.749
219.216	99.2534	102.172
222.956	99.3924	101.15
226.698	98.7195	100.919
230.438	99.1208	101.442
234.178	98.4942	103.053
237.915	100.683	101.222
241.652	100.39	102.181
245.389	99.2304	102.359
249.127	100.364	103.043
252.865	100.358	102.721
256.602	100.751	103.369
260.341	99.7383	102.141
264.08	99.3149	103.616
267.82	99.9968	102.136
271.56	99.2379	102.177
275.304	98.9288	103.15
279.041	100.059	101.851
282.784	99.481	102.56
286.521	99.9172	102.266
290.262	99.3794	102.596
293.999	99.7744	102.714
297.74	98.7474	103.297
301.476	98.9119	103.641
305.218	100.354	104.094
308.953	99.7354	103.671
312.693	100.134	103.885
316.429	100.276	104.521
320.167	98.8066	103.948
323.917	99.5383	103.741
327.654	100.201	103.306
331.397	99.7297	104.367
335.136	99.8093	104.607
338.878	100.592	104.956
342.616	99.7859	104.691
346.36	100.634	104.393
350.096	100.199	103.837
353.836	100.593	105.207
357.571	98.6595	105.269
361.312	100.262	104.869
365.047	100.297	103.742
368.785	99.7092	105.09
372.523	98.4318	104.494
376.261	100.126	105.908
379.997	101.135	106.296
383.734	99.248	105.037
387.474	100.621	106.896
391.227	98.2652	106.679
394.967	100.356	105.934
398.703	100.769	106.289
402.444	101.166	105.055
406.181	100.282	106.59
409.922	101.626	104.501
413.659	100.619	105.936
417.398	100.651	106.263
421.137	100.323	108.317
424.875	100.633	105.614
428.616	102.108	106.726
432.352	100.052	107.666
436.09	99.6312	106.924
439.83	100.023	106.27
443.57	99.3817	107.9
447.307	100.629	106.953
453.455	100.478	107.363
457.197	99.969	108.742
460.942	100.608	108.911
464.683	102.297	109.74
468.42	103.565	108.67
472.16	105.223	110.22
475.896	105.687	111.519
479.635	106.792	113.977
483.372	108.244	113.976
487.111	110.994	115.861
490.85	112.766	115.267
494.59	113.191	118.767
498.327	115.931	119.53
502.063	118.492	119.319
505.803	118.688	121.649
509.542	119.362	123.497
513.279	120.853	125.137
517.021	122.788	123.711
520.763	123.507	126.437
524.498	125.857	125.683
528.24	124.733	126.649
531.98	126.928	128.2
535.72	128.921	128.067
539.457	127.416	128.078
543.198	128.808	129.878
546.937	131.095	129.937
550.679	131.391	129.416
554.415	131.663	130.591
558.153	132.845	129.696
561.891	133.594	132.27
565.628	133.299	131.805
569.366	133.855	133.29
573.105	135.768	133.487
576.848	135.824	133.939
580.585	136.539	133.758
584.328	136.737	135.816
588.065	137.637	133.412
591.808	135.56	135.982
595.547	139.279	135.462
599.284	139.728	135.77
603.026	139.874	134.867
606.769	140.183	134.704
610.506	138.471	137.38
614.244	139.474	134.755
617.975	141.851	136.633
621.714	141.767	135.337
625.451	138.14	135.847
629.186	141.768	136.9
632.927	139.722	137.701
636.66	142.694	137.067
640.401	140.433	136.834
644.138	140.314	137.047
647.88	141.503	138.674
651.616	141.481	138.385
655.356	143.508	138.721
659.091	142.621	137.609
662.83	145.643	138.497
666.569	143.996	138.481
670.31	145.492	139.058
674.04	143.212	139.237
677.781	143.983	139.049
681.523	143.844	139.619
685.26	145.072	139.439
689	144.843	138.266
692.735	143.862	139.098
696.474	144.711	140.195
700.208	145.501	140.896
703.943	144.522	141.63
707.677	145.855	141.651
711.413	145.853	141.328
715.149	144.988	142.57
718.882	145.415	141.489
722.617	147.918	142.614
726.352	146.291	141.841
730.087	145.784	142.508
733.82	144.467	139.034
737.558	148.385	143.113
741.292	147.743	146.364
745.028	147.93	144.099
748.761	149.183	142.838
752.5	148.773	142.805
756.235	150.773	143.498
759.971	148.535	142.676
763.707	148.969	145.488
767.446	148.054	143.803
771.183	148.866	143.43
774.918	148.3	142.281
778.657	148.866	146.406
782.395	149.699	144.443
786.128	151.629	144.779
789.865	150.206	144.877
793.598	150.4	146.194
797.331	149.132	146.373
801.072	150.783	147.001
804.807	153.117	148.399
808.54	150.511	146.429
812.277	151.143	146.981
816.013	149.673	148.185
819.748	149.46	144.839
823.486	150.974	146.053

## Sheet: Fig.4c
GB1a/2 + APP
Trace 10 µM peptide / 10 µM GABA					Column graph 10 µM peptide / 10 µM peptide + 10 µM GABA
Time (s)	APP17	sc-APP17				APP17								sc-APP17
0	100.099	96.6646			10 μM Peptide	1.11105	5.0666	-1.20437	1.07112	1.86661	-0.95301	-0.76957	0.57072	1.13986	-1.30383	-2.02894	0.366691	-1.27132	-0.06212	-0.84447	-2.47757
3.739	100.333	97.8912			10 μM Peptide + 10 µM GABA	75.7652	31.3831	44.06	36.7084	55.4594	24.5764	42.4065	50.6928	38.6327	55.1044	82.2621	28.1509	41.6086	32.4842	84.1202	49.3909
7.475	100.004	99.1377
11.213	99.6664	98.7425
14.951	100.676	99.4407
18.688	99.9469	98.7743
22.43	100.565	98.8701
26.168	99.9119	99.0023
29.907	99.1648	98.4156
33.644	98.9476	98.8492
37.388	100.545	100.01
41.124	99.5165	99.0597
44.861	99.2401	99.8714
48.601	99.6067	100.846
52.342	99.4706	100.162
56.077	100.967	100.766
59.82	100.23	99.6134
63.555	99.5808	99.4028
67.293	100.597	100.952
71.029	100.246	99.3162
77.157	100.93	99.6567
80.905	99.6628	99.7884
84.64	98.9627	99.115
88.376	98.7776	99.7767
92.116	98.7541	100.183
95.851	99.2422	100.364
99.589	98.086	100.02
103.328	98.5905	100.789
107.071	99.1018	100.172
110.809	97.9517	100.608
114.549	98.8531	100.971
118.282	98.1857	101.094
122.021	98.5639	100.966
125.754	98.7294	99.4499
129.49	98.3717	101.055
133.228	98.4927	101.558
136.968	98.7205	100.314
140.704	97.7033	101.358
144.441	97.6512	100.879
148.178	98.1393	100.689
151.915	98.8702	100.518
155.655	98.1666	101.672
159.39	98.4176	102.383
163.127	98.9079	102.488
166.864	97.7861	102.097
170.607	97.1324	102.462
174.346	98.258	102.796
178.088	97.8078	101.958
181.826	98.8598	100.85
185.566	98.1426	100.82
189.301	98.4915	101.358
193.038	97.1865	102.271
196.775	97.5968	101.874
200.514	99.6134	102.905
204.251	99.0032	102.197
207.987	98.2495	101.733
211.729	98.7897	101.838
215.468	98.6115	102.35
219.216	98.8641	102.168
222.956	97.9651	103.566
226.698	99.6498	101.959
230.438	98.5866	103.897
234.178	98.2859	102.239
237.915	98.367	101.593
241.652	97.8642	101.911
245.389	98.9207	101.919
249.127	97.9936	103.823
252.865	97.3112	102.47
256.602	98.1546	103.001
260.341	98.6962	103.329
264.08	97.7016	103.183
267.82	96.6846	101.957
271.56	98.0256	102.542
275.304	98.7175	103.983
279.041	98.8365	102.729
282.784	99.9161	103.054
286.521	98.6659	103.462
290.262	99.7011	104.719
293.999	98.8298	104.532
297.74	97.4087	104.245
301.476	98.5069	103.481
305.218	98.4308	105.491
308.953	98.1645	103.655
312.693	98.8438	104.954
316.429	98.5205	103.09
320.167	97.2776	103.436
323.917	97.1243	105.216
327.654	98.8261	104.778
331.397	98.7461	102.597
335.136	98.4949	105.14
338.878	99.1611	104.372
342.616	98.1609	103.871
346.36	97.7697	103.398
350.096	98.9987	104.105
353.836	99.7549	104.96
357.571	99.393	103.006
361.312	99.1949	104.161
365.047	98.6213	104.057
368.785	99.0131	104.504
372.523	98.809	104.712
376.261	99.7149	103.503
379.997	98.7026	104.057
383.734	99.7289	104.572
387.474	98.524	105.521
391.227	98.7943	106.032
394.967	97.8885	105.498
398.703	99.3886	105.507
402.444	97.0677	103.956
406.181	98.6832	105.759
409.922	99.4039	105.033
413.659	98.3243	105.242
417.398	99.5291	104.849
421.137	99.3747	104.429
424.875	98.5613	104.075
428.616	96.9887	105.991
432.352	99.004	105.068
436.09	98.801	105.443
439.83	98.177	104.318
443.57	99.3701	107.166
447.307	99.2084	106.209
453.455	98.0347	104.563
457.197	98.7533	104.408
460.942	99.1713	105.466
464.683	100.132	107.653
468.42	100.052	108.824
472.16	102.449	109.505
475.896	104.564	112.388
479.635	105.793	113.161
483.372	106.938	114.975
487.111	107.747	115.035
490.85	109.112	116.92
494.59	110.753	117.076
498.327	111.234	121.385
502.063	113.422	122.452
505.803	115.312	122.742
509.542	115.087	124.454
513.279	114.718	127.29
517.021	116.79	127.132
520.763	119.695	128.286
524.498	120.737	128.799
528.24	121.629	132.189
531.98	121.744	131.32
535.72	121.898	134.326
539.457	123.894	135.673
543.198	123.56	133.356
546.937	124.815	133.52
550.679	125.766	135.059
554.415	125.995	134.921
558.153	127.557	134.991
561.891	128.594	136.392
565.628	129.999	138.224
569.366	129.017	137.512
573.105	127.952	138.874
576.848	129.043	137.089
580.585	129.441	138.52
584.328	128.485	141.194
588.065	130.978	138.896
591.808	130.692	139.575
595.547	132.447	142.156
599.284	131.522	142.581
603.026	129.301	143.762
606.769	131.977	142.515
610.506	132.686	142.47
614.244	131.883	143.02
617.975	131.425	141.962
621.714	133.251	143.286
625.451	130.941	144.426
629.186	132.994	142.599
632.927	132.73	145.476
636.66	134.738	144.049
640.401	134.687	147.198
644.138	135.115	145.666
647.88	137.378	147.799
651.616	135.153	147.389
655.356	137.604	144.931
659.091	137.087	147.22
662.83	136.992	145.647
666.569	136.88	147.671
670.31	133.748	150.538
674.04	136.616	146.414
677.781	138.057	147.269
681.523	135.167	147.719
685.26	137.629	149.165
689	137.752	147.663
692.735	136.549	149.555
696.474	138.625	151.636
700.208	138.824	149.735
703.943	139.416	149.184
707.677	137.259	148.992
711.413	137.787	151
715.149	138.999	151.534
718.882	139.286	151.238
722.617	139.946	149.726
726.352	140.105	154.114
730.087	137.905	152.597
733.82	139.574	151.87
737.558	141.033	149.019
741.292	138.463	149.551
745.028	139.13	154.288
748.761	141.074	152.487
752.5	141.83	152.192
756.235	141.783	150.94
759.971	141.766	153.774
763.707	142.443	154.047
767.446	142.002	154.063
771.183	140.626	155.157
774.918	141.279	152.581
778.657	140.421	152.934
782.395	138.597	152.431
786.128	142.94	154.769
789.865	143.625	154.19
793.598	144.118	156.747
797.331	144.633	153.84
801.072	142.313	155.591
804.807	142.56	152.307
808.54	142.659	156.743
812.277	141.555	154.108
816.013	143.128	155.182
819.748	145.671	154.214
823.486	141.576	153.304
