# Supplementary material for: Soluble amyloid-β precursor peptide does not regulate GABAB receptor activity
Source: eLife. 2023 Jan 23;12:e82082. doi: 10.7554/eLife.82082 (PMC9917443; doi:10.7554/eLife.82082)
Supplement: Figure 5—figure supplement 1—source data 1. [file elife-82082-fig5-figsupp1-data1.xlsx]

## Sheet: Fig.5 - figure supplement 1
Dose-response (left)																									Dose-response (right)
Log [GABA] (M)	GB1a/2											GB1a/2 + APP (cis)													Log [GABA] (M)	GB1a/2											GB1a/2 + APP (trans)
-8	0.353245	0.214698	0.307581	0.249655	0.326063	0.18233	0.245873	0.229769	0.220744	0.24435	0.286885	0.263688	0.25862	0.322305	0.222208	0.241278	0.198067	0.204726	0.239915	0.233443	0.186027	0.279047			-8	0.536739	0.511812	0.41454	0.375682	0.3347	0.560429	0.278485	0.551421	0.492817	0.511956	0.329577	0.499026	0.372131	0.327133	0.450535	0.395782	0.532098	0.301839	0.485438	0.433948	0.433623	0.328441
-7	0.399385	0.396866	0.427844	0.348972	0.381652	0.329691	0.30427	0.414123	0.39377	0.381949	0.329861	0.364378	0.345868	0.463886	0.339529	0.357002	0.313076	0.30636	0.427824	0.314423	0.334084	0.339553			-7	0.773366	0.722034	0.623537	0.501106	0.466183	0.567834	0.570159	0.437335	0.488182	0.500231	0.497099	0.733809	0.543108	0.62828	0.513925	0.533234	0.588335	0.69604	0.514089	0.485603	0.374821	0.51558
-6.5	0.539374	0.525898	0.499527	0.595627	0.524414	0.398052	0.542782	0.635972	0.487128	0.599215	0.569069	0.446936	0.475494	0.578592	0.455227	0.559185	0.454263	0.448524	0.520854	0.485497	0.467554	0.599432			-6.5	0.845264	0.773248	0.546079	0.655466	0.677206	0.972909	0.819409	0.694605	0.532644	0.725876	0.833164	0.677288	0.760877	0.759298	0.692236	0.658225	0.788329	0.904758	0.688426	0.666475	0.908322	0.752265
-6	0.722349	0.720292	0.926596	0.64124	0.756078	0.738277	0.814007	0.781916	0.829789	0.86396	0.797103	0.665837	0.542096	0.837637	0.820092	0.745779	0.819802	0.77486	0.629199	0.724077	0.805247	0.757451			-6	1.26225	1.1102	0.858575	0.826082	0.708623	1.29393	0.950982	1.06153	0.971929	0.931266	0.781296	0.846256	0.977696	0.898966	0.976338	0.961456	1.00483	0.712562	0.947801	0.836465	0.852933	1.21307
-5.5	0.979436	0.882568	1.12542	0.836006	0.9879	0.989823	0.962852	1.0272	0.946537	0.952116	1.07527	0.844422	0.732122	1.08638	0.946666	0.996338	0.963703	0.932906	0.804991	0.911139	0.935565	0.973613			-5.5	1.05801	1.01256	0.815478	1.16446	1.01092	1.27982	1.1633	1.23309	0.796693	1.0841	1.08708	1.14265	1.08658	0.917242	1.13827	1.15237	1.06241	1.0809	0.97116	0.997301	1.13504	1.1585
-5	0.963295	0.773794	0.97498	0.885879	1.03444	0.974611	0.893921	1.16014	0.940161	0.965006	0.987765	0.948546	0.764663	0.982164	0.972187	0.981527	0.884397	0.961875	0.880194	1.02045	1.07025	0.968364			-5	1.30775	1.07225	0.895224	0.924071	0.941459	1.30244	1.33738	1.03113	1.04831	0.870778	0.853998	0.990881	0.878415	0.990874	1.27418	1.03463	0.953536	0.960251	1.01773	1.21593	0.9694	1.33865
-4.5	1.11018	1.01144	1.02471	0.930404	0.873158	0.781747	0.810646	0.931533	1.04559	1.14903	0.877358	0.767731	0.893827	1.10756	0.967602	0.90653	1.12391	0.889326	0.960061	1.04135	1.02923	0.98312			-4.5	0.965522	0.953926	0.921307	0.925878	1.04663	1.47242	1.12512	0.936578	1.12666	1.10442	1.05329	1.08677	0.882687	0.830298	1.05781	0.876369	1.2184	1.22619	1.09483	1.01642	1.15655	1.31616
-4	0.976269	1.00904	0.956773	0.972377	0.947436	1.06345	0.93215	0.953112	1.12149	1.09737	1.0083	0.998513	0.978451	0.937652	0.928597	0.966469	0.90568	1.05454	1.04452	0.98218	1.07768	1.0539			-4	0.881954	0.984416	0.953422	1.02883	1.12124	0.90712	0.778514	1.05522	0.910781	1.02048	1.11577	0.925682	1.02301	0.881705	0.871598	1.2025	0.91248	1.00477	1.1886	0.850332	1.28867	1.22264
-3.5	0.984015	0.970558	0.916548	1.12044	1.03243	0.954827	1.01557	1.19598	0.904703	1.01394	1.05981	1.05828	0.992895	0.959645	0.976242	1.07196	1.09912	1.00939	1.056	1.14217	1.01169	1.02952			-3.5	1.10565	0.964165	0.90733	0.904736	0.971801	1.09589	1.05666	0.989002	1.10306	1.0354	0.852855	1.24781	1.00835	1.12287	1.18752	0.927918	1.21782	0.881814	0.92117	1.12001	0.801845	0.779263
-3	1.03972	1.0204	1.12668	0.907182	1.02013	0.981722	1.05228	0.850912	0.973802	0.888693	0.931891	0.943208	1.02866	1.1027	1.09516	0.961572	0.995202	0.936074	0.899479	0.875647	0.910635	0.916572			-3	1.0124	1.05142	1.13925	1.06644	0.906958	0.996991	1.16483	0.955783	0.986158	0.944121	1.03138	0.826503	0.968641	0.995425	0.940886	0.869579	0.869703	1.11342	0.890225	1.02965	0.909483	0.998094
Non-linear regression (curve fit) - values for table								Non-linear regression (curve fit) - values for table
	GB1a/2	GB1a/2 + APP (cis)	Global (shared)						GB1a/2	GB1a/2 + APP (trans)	Global (shared)
Comparison of Fits								Comparison of Fits
Null hypothesis			One curve for all data sets					Null hypothesis			One curve for all data sets
Alternative hypothesis			Different curve for each data set					Alternative hypothesis			Different curve for each data set
P value			0.1995					P value			0.9561
Conclusion (alpha = 0.05)			Do not reject null hypothesis					Conclusion (alpha = 0.05)			Do not reject null hypothesis
Preferred model			One curve for all data sets					Preferred model			One curve for all data sets
F (DFn, DFd)			1.513 (4, 212)					F (DFn, DFd)			0.1645 (4, 212)
Different curve for each data set								Different curve for each data set
Best-fit values								Best-fit values
Bottom	0.2648	0.2376						Bottom	0.4598	0.4161
Top	0.9931	0.9949						Top	1.032	1.035
LogEC50	-6.338	-6.271						LogEC50	-6.514	-6.571
HillSlope	1.274	1.097						HillSlope	1.729	1.386
EC50	4.589e-07	5.358e-07						EC50	3.061e-07	2.687e-07
Span	0.7283	0.7574						Span	0.5717	0.6185
Std. Error								Std. Error
Bottom	0.02472	0.02435						Bottom	0.03994	0.04192
Top	0.01129	0.01128						Top	0.01715	0.01679
LogEC50	0.04771	0.04888						LogEC50	0.07974	0.08527
HillSlope	0.1481	0.1137						HillSlope	0.4857	0.3176
Span	0.02854	0.02855						Span	0.04508	0.04694
95% CI (profile likelihood)								95% CI (profile likelihood)
Bottom	0.2111 to 0.3133	0.1845 to 0.2847						Bottom	0.3698 to 0.5375	0.3246 to 0.4950
Top	0.9712 to 1.016	0.9730 to 1.018						Top	0.9987 to 1.065	1.003 to 1.067
LogEC50	-6.439 to -6.242	-6.373 to -6.175						LogEC50	-6.702 to -6.352	-6.761 to -6.397
HillSlope	1.012 to 1.620	0.8863 to 1.369						HillSlope	1.084 to ???	0.9454 to 2.196
EC50	3.637e-007 to 5.725e-007	4.240e-007 to 6.686e-007						EC50	1.987e-007 to 4.448e-007	1.735e-007 to 4.009e-007
Goodness of Fit								Goodness of Fit
Degrees of Freedom	106	106						Degrees of Freedom	106	106
R squared	0.9231	0.9356						R squared	0.7223	0.7545
Sum of Squares	0.6773	0.589						Sum of Squares	1.917	1.713
Sy.x	0.07994	0.07454						Sy.x	0.1345	0.1271
Normality of Residuals								Normality of Residuals
D'Agostino-Pearson omnibus (K2)	1.207	3.924						D'Agostino-Pearson omnibus (K2)	9.262	3.278
P value	0.5469	0.1406						P value	0.0097	0.1942
Passed normality test (alpha=0.05)?	Yes	Yes						Passed normality test (alpha=0.05)?	No	Yes
P value summary	ns	ns						P value summary	**	ns
Test for homoscedasticity								Test for homoscedasticity
Rs of predicted Y vs. |residual|	0.1492	0.214						Rs of predicted Y vs. |residual|	-0.1089	0.3399
P value (one tailed)	0.0599	0.0124						P value (one tailed)	0.1287	0.0001
Passed (P > 0.05)?	Yes	No						Passed (P > 0.05)?	Yes	No
One curve for all data sets								One curve for all data sets
Best-fit values								Best-fit values
Bottom	0.2514	0.2514	0.2514					Bottom	0.4373	0.4373	0.4373
Top	0.9934	0.9934	0.9934					Top	1.033	1.033	1.033
LogEC50	-6.306	-6.306	-6.306					LogEC50	-6.544	-6.544	-6.544
HillSlope	1.183	1.183	1.183					HillSlope	1.524	1.524	1.524
EC50	4.94e-07	4.94e-07	4.94e-07					EC50	2.856e-07	2.856e-07	2.856e-07
Span	0.742	0.742	0.742					Span	0.5957	0.5957	0.5957
Std. Error								Std. Error
Bottom	0.01742	0.01742	0.01742					Bottom	0.02882	0.02882	0.02882
Top	0.008005	0.008005	0.008005					Top	0.01192	0.01192	0.01192
LogEC50	0.03433	0.03433	0.03433					LogEC50	0.05853	0.05853	0.05853
HillSlope	0.09225	0.09225	0.09225					HillSlope	0.266	0.266	0.266
Span	0.02026	0.02026	0.02026					Span	0.03234	0.03234	0.03234
95% CI (profile likelihood)								95% CI (profile likelihood)
Bottom	0.2144 to 0.2856	0.2144 to 0.2856	0.2144 to 0.2856					Bottom	0.3760 to 0.4933	0.3760 to 0.4933	0.3760 to 0.4933
Top	0.9779 to 1.009	0.9779 to 1.009	0.9779 to 1.009					Top	1.010 to 1.056	1.010 to 1.056	1.010 to 1.056
LogEC50	-6.377 to -6.238	-6.377 to -6.238	-6.377 to -6.238					LogEC50	-6.672 to -6.425	-6.672 to -6.425	-6.672 to -6.425
HillSlope	1.010 to 1.392	1.010 to 1.392	1.010 to 1.392					HillSlope	1.138 to 2.186	1.138 to 2.186	1.138 to 2.186
EC50	4.198e-007 to 5.780e-007	4.198e-007 to 5.780e-007	4.198e-007 to 5.780e-007					EC50	2.128e-007 to 3.762e-007	2.128e-007 to 3.762e-007	2.128e-007 to 3.762e-007
Goodness of Fit								Goodness of Fit
Degrees of Freedom			216					Degrees of Freedom			216
R squared	0.921	0.9336	0.9275					R squared	0.7214	0.7538	0.7377
Sum of Squares	0.6952	0.6073	1.302					Sum of Squares	1.923	1.719	3.642
Sy.x			0.07765					Sy.x			0.1298
Normality of Residuals								Normality of Residuals
D'Agostino-Pearson omnibus (K2)	1.234	4.685	3.702					D'Agostino-Pearson omnibus (K2)	9.269	3.536	9.38
P value	0.5397	0.0961	0.1571					P value	0.0097	0.1706	0.0092
Passed normality test (alpha=0.05)?	Yes	Yes	Yes					Passed normality test (alpha=0.05)?	No	Yes	No
P value summary	ns	ns	ns					P value summary	**	ns	**
Constraints								Constraints
Bottom	Bottom is shared	Bottom is shared						Bottom	Bottom is shared	Bottom is shared
Top	Top is shared	Top is shared						Top	Top is shared	Top is shared
LogEC50	LogEC50 is shared	LogEC50 is shared						LogEC50	LogEC50 is shared	LogEC50 is shared
HillSlope	HillSlope is shared	HillSlope is shared						HillSlope	HillSlope is shared	HillSlope is shared
Test for homoscedasticity								Test for homoscedasticity
Rs of predicted Y vs. |residual|	0.1483	0.1876	0.1711					Rs of predicted Y vs. |residual|	-0.1136	0.3363	0.1098
P value (one tailed)	0.0611	0.0248	0.0055					P value (one tailed)	0.1187	0.0002	0.0521
Passed (P > 0.05)?	Yes	No	No					Passed (P > 0.05)?	Yes	No	Yes
Number of points								Number of points
# of X values	110	110						# of X values	110	110
# Y values analyzed	110	110						# Y values analyzed	110	110
