# Supplementary material for: Soluble amyloid-β precursor peptide does not regulate GABAB receptor activity
Source: eLife. 2023 Jan 23;12:e82082. doi: 10.7554/eLife.82082 (PMC9917443; doi:10.7554/eLife.82082)
Supplement: Figure 5—figure supplement 2—source data 1. [file elife-82082-fig5-figsupp2-data1.xlsx]

## Sheet: Fig.5 - figure supplement 2a
Time (s)	GBR + 1 μM APP17	GBR + 10 μM APP17	GBR + 1 μM scAPP17	GBR + 10 μM scAPP17	GBR + 1 μM GABA	GBR + 10 μM GABA	mGlu5 + 1 μM DHPG	mGlu5 + 10 μM DHPG
0	0.999767	0.999107	0.997848	1.00224	0.997575	0.995686	0.994737	0.997056
1.168	1.00239	1.00351	0.996102	0.999233	1.00012	1.00187	0.99403	0.995151
2.338	0.998961	1.0054	0.998429	0.999019	0.998163	0.99681	0.996327	0.993592
3.51	0.999767	1.00603	0.999011	1.00031	1.00287	1.00037	0.997387	0.994112
4.686	0.999767	1.00162	1.0027	0.997086	0.995615	1.00187	0.997564	0.996709
5.857	0.999162	0.997639	0.995326	1.00267	1.00012	0.996061	0.997211	0.993419
7.028	0.996946	0.998059	1.00095	0.998589	0.996595	0.999809	1.00127	0.995843
8.198	1.00118	1.00267	1.00114	0.999878	0.997575	0.99681	0.998448	0.99948
9.37	0.99755	1.00519	0.998235	0.998589	1.0011	0.997373	1.00092	0.998614
10.542	1.00319	1.00204	1.00018	0.996871	0.998163	1.00524	0.999508	1.00329
11.712	1.00239	1.00141	0.997848	0.996871	0.997379	0.998122	1.00428	1.00104
12.886	1.004	1.00183	0.997654	0.999448	0.998359	0.995124	0.998448	1.00225
14.057	0.999565	0.993654	0.996878	1.00095	1.00052	1.00018	1.00039	0.998268
15.227	0.999968	0.99701	1.00114	1.00289	0.999535	0.998122	1.00092	0.998961
16.398	0.999364	0.998898	0.995908	1.0016	1.00287	0.995873	1.00233	1.00727
17.57	0.997147	0.998478	1.00056	1.00224	1.00189	1.00168	1.0011	1.00312
18.742	1.00198	1.00267	0.994938	0.997086	0.999339	1.00262	1.00357	1.00571
19.918	0.997349	1.00058	0.99552	1.00374	1.00326	0.998872	1.00481	1.00121
21.087	0.999565	1.00183	0.999205	0.996226	0.998163	0.999996	1.00428	1.00589
22.259	0.995938	0.99701	0.999205	0.998159	1.00071	0.999622	1.00057	1.00485
23.429	1.00077	0.998059	1.00056	0.9973	0.999535	0.998497	1.0064	1.00571
24.601	0.999968	1.00267	1.00114	1.00095	0.996595	0.998872	1.00693	1.00606
25.77	1.00017	0.999947	0.997072	1.00052	0.996595	1.00018	1.00516	1.0045
26.944	1.00098	1.00162	0.999981	0.999448	1.00385	1.00056	1.00163	1.00623
28.111	0.999364	0.99701	1.00328	1.00246	1.00189	1.00281	1.0011	1.00502
29.281	1.00138	0.999947	1.00095	0.995367	0.998947	1.00056	1.0011	1.00052
30.451	1.0038	1.00141	0.994744	1.00181	1.00052	1.00075	1.00127	1.00121
31.62	0.994326	0.999737	0.998042	1.00031	1.00032	1.00393	0.998624	1.00173
32.793	0.998155	0.99701	1.00076	1.00181	0.997379	0.99756	1.00357	0.999654
33.967	0.996341	0.998478	1.00289	0.971525	0.997967	1.00075	1.00181	1.00329
35.142	1.00057	0.998898	1.00153	0.999663	0.994243	0.999996	0.999508	0.998614
36.319	1.00279	0.994493	1.00289	0.999019	0.995615	0.999434	1.00304	0.999654
37.487	0.997953	0.997849	0.999981	1.00417	1.00208	1.00262	1.00764	0.996883
38.659	1.00017	1.00079	0.99746	0.997945	1.00012	1.00225	0.997918	0.998788
39.833	0.998759	0.995961	1.00192	1.00439	1.00071	1.003	1.00163	1.00017
41.009	1.00279	1.00058	1.0025	1.00374	1.00208	0.99831	0.995974	1.0026
42.178	1.0046	1.00079	1.00037	0.999448	1.00483	0.996061	1.00057	1.00087
43.348	0.999767	1.00582	1.00211	1.00847	0.998359	0.998122	0.998801	1.00364
44.516	1.00098	1.00058	1.00076	1.00224	1.00365	0.997935	1.00127	0.996536
45.685	0.996946	1.00477	1.00231	0.999233	1.00208	1.00243	0.999685	1.00208
46.863	1.00138	1.00058	1.00211	0.999233	1.00052	1.00356	0.998978	1
48.034	0.993721	1.00162	1.00192	1.00203	1.00443	1.00393	0.998801	0.996883
49.208	0.998155	0.999317	1.00619	0.999448	0.999731	1.00075	0.998978	0.999134
50.378	1.00158	0.998688	1.00289	1.00031	1.00208	0.999247	0.993853	0.996883
51.548	0.999767	0.999317	0.999205	1.00138	0.999731	1.00187	0.997918	0.998095
52.719	0.998558	1.00141	0.997266	1.00181	0.996203	0.998684	0.995443	0.996536
53.898	1.0036	0.996381	1.00076	1.00052	1.00424	1.00187	0.995267	0.993246
55.073	0.998759	0.998268	1.00386	1.00331	1.00032	1.00225	0.993323	0.998441
56.244	1.00339	1.00246	1.00289	1.00482	1.00052	1.0015	1.00039	0.996363
57.412	1.0038	0.993863	1.00211	1.00052	1.00267	1.00093	0.996327	0.996017
58.582	1.00077	0.99701	1.00076	1.0031	1.00228	0.998684	0.998978	0.998788
68.732	0.977599	0.976243	0.982526	0.982265	0.979152	0.983879	1.00322	1.42085
69.903	0.981025	0.975404	0.983884	0.985486	0.985032	0.983879	1.06825	1.60686
71.071	0.977801	0.948345	0.986017	0.988279	0.979936	0.98313	1.13735	1.68947
72.241	0.984249	0.977292	0.985435	0.985486	0.987776	0.985191	1.1886	1.72653
73.411	0.984854	0.981068	0.987762	0.990427	0.987776	0.98744	1.22093	1.72913
74.584	0.988481	0.984214	0.991835	0.991501	0.989932	0.98744	1.24497	1.73052
75.759	0.989489	0.985053	0.986405	0.990427	0.98366	0.990439	1.24938	1.72393
76.937	0.988683	0.984843	0.993775	0.988923	0.988168	0.989502	1.25327	1.71008
78.104	0.98566	0.985683	0.993387	0.990427	0.989148	0.992688	1.25062	1.68843
79.273	0.98566	0.97897	0.990672	0.990427	0.989932	0.988939	1.24355	1.65812
80.443	0.995535	0.985473	0.987181	0.991071	0.992675	0.991563	1.23065	1.63284
81.615	0.984048	0.983585	0.990866	0.99279	0.989344	0.988565	1.22535	1.6079
82.791	0.986063	0.983795	0.992029	0.989138	0.992479	0.993812	1.20202	1.57395
83.964	0.984451	0.988409	0.992611	0.987849	0.992675	0.992125	1.18771	1.54555
85.136	0.989086	0.984214	0.991641	0.98656	0.992675	0.991563	1.16597	1.51576
86.307	0.987071	0.983375	0.992223	0.990642	0.990912	0.98744	1.15467	1.49203
87.477	0.990698	0.979809	0.990478	0.990427	0.992675	0.991938	1.13434	1.46276
88.651	0.995535	0.984214	0.991835	0.990212	0.995811	0.993437	1.12144	1.44008
89.825	0.991706	0.989249	0.988344	0.988923	0.993655	0.994936	1.11031	1.41981
90.998	0.990295	0.988619	0.993969	0.994508	0.991696	0.994187	1.09105	1.39591
92.166	0.984854	0.987361	0.994163	0.989782	0.996203	0.995499	1.08522	1.37634
93.336	0.990497	0.985263	0.987762	0.98699	0.993067	0.994562	1.07444	1.35573
94.506	0.987877	0.981697	0.992611	0.990427	0.992283	0.995311	1.0626	1.33512
95.679	0.988884	0.987361	0.987956	0.988494	0.996007	0.991188	1.05588	1.31573
96.859	0.987675	0.986312	0.987956	0.991286	0.994047	0.997747	1.05199	1.29702
98.031	0.992915	0.984424	0.991447	0.985272	0.996399	0.991376	1.03998	1.28161
99.2	0.991504	0.986522	0.989896	0.989997	0.992675	0.993999	1.03609	1.26983
100.37	0.992109	0.986102	0.99746	0.986775	0.996203	0.991188	1.0299	1.25494
101.54	0.992512	0.987151	0.990478	0.991286	0.98954	0.990813	1.02478	1.24004
102.713	0.990698	0.982536	0.993581	0.991716	0.997183	0.992688	1.02337	1.22982
103.888	0.995938	0.983795	0.994357	0.989138	0.990716	0.988565	1.02319	1.21735
105.065	0.994527	0.986102	0.99746	0.991286	0.993263	0.991376	1.01612	1.20714
106.238	0.99231	0.982326	0.993581	0.989138	0.9915	0.994562	1.01435	1.19345
107.408	0.9909	0.983375	0.992999	0.98656	0.989932	0.994749	1.01718	1.18895
108.576	0.987877	0.982536	0.994744	0.98656	0.987384	0.999434	1.01223	1.18358
109.748	0.986063	0.983375	0.990866	0.987849	0.992283	0.99681	1.014	1.16765
110.923	0.991907	0.983165	0.991253	0.989353	0.991108	0.994562	1.011	1.16661
112.098	0.991504	0.985263	0.991253	0.983124	0.9915	0.989876	1.00887	1.16211
113.265	0.991504	0.984004	0.992223	0.988279	0.994439	0.991376	1.01153	1.15674
114.435	0.992915	0.984214	0.988732	0.983339	0.99052	0.991376	1.00923	1.15189
115.605	0.996139	0.982117	0.992223	0.993434	0.990324	0.991376	1.00711	1.14981
116.778	0.994124	0.982956	0.991641	0.988279	0.990128	0.993625	1.00569	1.14652
117.96	0.993923	0.983795	0.993193	0.99279	0.990324	0.994374	1.00905	1.14219
119.137	0.995333	0.980019	0.99009	0.98742	0.990128	0.991563	1.00834	1.14028
120.307	0.993117	0.980019	0.99009	0.988279	0.989148	0.99175	1.01082	1.13526
121.477	0.99231	0.980858	0.989314	0.986131	0.992479	0.992125	1.01117	1.13405
122.647	0.988481	0.982746	0.995132	0.990856	0.993263	0.995124	1.00764	1.13284
123.818	0.990497	0.981278	0.994357	0.99193	0.994635	0.991563	1.0094	1.12937
124.997	0.984854	0.981278	0.993387	0.984842	0.992087	0.992688	1.01488	1.13249
126.169	0.986466	0.982746	0.991835	0.985701	0.994831	0.993999	1.00958	1.13007
127.337	0.989892	0.985263	0.992223	0.989353	0.990128	0.988939	1.01029	1.13145
128.507	0.99231	0.980229	0.989314	0.985486	0.988364	0.992313	1.00711	1.12816
129.675	0.993923	0.981068	0.994551	0.987849	0.991892	0.990064	1.01577	1.13491
130.847	0.992512	0.984634	0.994551	0.98656	0.989736	0.992875	1.01259	1.13457
132.022	0.990094	0.977921	0.993387	0.985701	0.991696	0.992125	1.01188	1.13925
133.196	0.989086	0.983795	0.990478	0.985701	0.994047	0.995686	1.00799	1.14063
134.366	0.994124	0.981068	0.992223	0.986346	0.993851	0.993437	1.01205	1.14548
135.534	0.99493	0.985053	0.989314	0.984198	0.992675	0.993999	1.01488	1.14998
136.703	0.995535	0.985892	0.992417	0.985057	0.991892	0.994562	1.01683	1.15518
137.877	0.99231	0.987361	0.989508	0.989138	0.996203	0.991001	1.01612	1.15293
139.054	0.990295	0.982956	0.987568	0.988279	0.995615	0.9925	1.02107	1.15501
140.226	0.995132	0.981068	0.987568	0.988708	0.994635	0.995499	1.01577	1.16505
141.394	0.995938	0.981068	0.986211	0.984198	0.989932	0.989502	1.02071	1.16695
142.564	0.990497	0.981697	0.989896	0.985701	0.995223	0.993437	1.02142	1.16488
143.731	0.994326	0.984634	0.989702	0.983983	0.992087	0.994187	1.02107	1.17423
144.906	0.989691	0.981487	0.992417	0.985057	0.993851	0.988752	1.02195	1.1744
146.08	0.993923	0.987361	0.99552	0.986346	0.992283	0.991938	1.01789	1.16921
147.254	0.991706	0.982536	0.990284	0.982479	0.995223	0.990626	1.02124	1.17336
148.424	0.991101	0.983375	0.986987	0.986775	0.997575	0.994374	1.01948	1.16817
149.594	0.992512	0.980438	0.992611	0.988923	0.994635	0.993625	1.02018	1.17319
150.762	0.997147	0.985053	0.989896	0.987849	0.994243	0.990813	1.02354	1.17336
151.933	0.991303	0.985263	0.992999	0.985486	0.98856	0.990439	1.02054	1.17094
153.111	0.989892	0.980229	0.991253	0.985701	0.994439	0.988939	1.02354	1.17232
154.285	0.986668	0.981068	0.99009	0.954556	0.996007	0.992313	1.02107	1.17232
155.455	0.992512	0.980229	0.985823	0.989568	0.994831	0.989876	1.02442	1.16626
156.626	0.991303	0.983375	0.988926	0.987849	0.992087	0.993062	1.02177	1.16315
157.796	0.993721	0.982956	0.990478	0.990856	0.997183	0.990813	1.0216	1.15899
158.97	0.991706	0.979599	0.992029	0.984198	0.997183	0.992313	1.02548	1.15986
160.149	0.991907	0.982746	0.992805	0.985486	0.995615	0.990813	1.02337	1.16366
161.321	0.996946	0.981907	0.993775	0.991501	0.996987	0.996436	1.02531	1.15812
162.491	0.99493	0.980648	0.990284	0.98699	0.997967	0.993999	1.0223	1.15656
163.661	0.994527	0.981278	0.989896	0.988064	0.998359	0.994562	1.01912	1.15518
164.833	0.996744	0.982536	0.997848	0.987205	0.996595	0.993999	1.01736	1.15293
166.003	0.99493	0.980858	0.991253	0.990856	0.995615	0.990813	1.02283	1.15518
167.178	0.990295	0.97897	0.985629	0.983339	0.993459	0.993999	1.02001	1.15137
168.349	0.989288	0.97939	0.987956	0.990427	0.994439	0.993062	1.02619	1.15137
169.519	0.991907	0.984004	0.989896	0.986346	0.993851	0.993625	1.02389	1.15067
170.687	0.987675	0.97876	0.990284	0.987634	0.992871	0.991001	1.02213	1.1531
171.859	0.992713	0.975194	0.993581	0.986346	0.994635	0.992313	1.02725	1.15483
173.03	0.987675	0.979599	0.990478	0.99236	0.993067	0.993812	1.02407	1.15275
174.204	0.993318	0.977292	0.990866	0.981835	0.995027	0.992313	1.02407	1.15466
175.376	0.99231	0.975614	0.994357	0.98656	0.993851	0.991376	1.0246	1.1557
176.547	0.99755	0.982117	0.990866	0.986131	0.996007	0.995499	1.01948	1.15518
177.717	0.992512	0.983585	0.993581	0.987849	0.991108	0.990813	1.01965	1.15743
178.889	0.993117	0.980648	0.993387	0.991501	0.991892	0.99325	1.02354	1.15379
180.061	0.992512	0.979599	0.987956	0.985916	0.993655	0.991563	1.02195	1.15327
181.237	0.991303	0.985683	0.991253	0.98699	0.992871	0.991001	1.02266	1.15362
182.41	0.99231	0.982746	0.993969	0.989353	0.993263	0.993812	1.01965	1.14756
183.58	0.990295	0.982117	0.986793	0.986775	0.996791	0.992313	1.0163	1.15206
184.754	0.997147	0.978551	0.990672	0.98742	0.990324	0.995873	1.01753	1.14531
185.922	0.988884	0.979599	0.993193	0.983553	0.992871	0.989689	1.01983	1.14704
187.097	0.992109	0.978341	0.992417	0.986131	0.992479	0.993812	1.01824	1.14652
188.275	0.990698	0.977921	0.992417	0.98699	0.993067	0.991188	1.01294	1.14687
189.45	0.995938	0.980438	0.988732	0.988708	0.992479	0.994374	1.01577	1.146
190.62	0.995938	0.978341	0.990478	0.984842	0.992871	0.996061	1.01488	1.14548
191.788	0.997953	0.983165	0.991253	0.986775	0.991892	0.99175	1.01064	1.14427
192.958	0.999364	0.978131	0.988344	0.991071	0.990912	0.99325	1.01718	1.14184
194.129	0.994326	0.981278	0.991447	0.985272	0.993655	0.998497	1.01612	1.13959
195.305	0.997147	0.97876	0.990672	0.98699	0.989736	0.9925	1.01842	1.13976
196.478	0.995535	0.978131	0.990672	0.993219	0.996007	0.993812	1.01912	1.13543
197.65	0.994326	0.977712	0.989314	0.985057	0.98954	0.990813	1.01524	1.1408
198.824	0.99352	0.980229	0.989314	0.98699	0.991108	0.995873	1.01965	1.13647
199.994	0.987071	0.979599	0.987568	0.984413	0.994831	0.991188	1.01665	1.13838
201.172	0.995736	0.977921	0.988344	0.988708	0.992087	0.993625	1.01612	1.13405
202.349	0.9909	0.97876	0.989314	0.984842	0.9915	0.991938	1.01718	1.13093
203.519	0.989691	0.980229	0.98912	0.987205	0.994439	0.998684	1.01824	1.13266
204.689	0.995736	0.980019	0.986793	0.990856	0.990912	0.995499	1.01524	1.13422
205.86	0.996139	0.985263	0.988926	0.984627	0.992087	0.993625	1.01965	1.13474
207.028	0.993117	0.980229	0.98912	0.984627	0.990716	0.992688	1.0193	1.13128
208.202	0.98828	0.982326	0.984077	0.985701	0.989344	0.995499	1.01718	1.13457
209.378	0.992915	0.97918	0.987762	0.986775	0.991696	0.995873	1.01453	1.12989
210.551	0.996341	0.982536	0.988344	0.990212	0.992871	0.995124	1.0163	1.12712
211.721	0.987877	0.97897	0.984659	0.989782	0.994635	0.993625	1.01488	1.12643
212.891	0.99231	0.983165	0.989508	0.984842	0.990716	0.994187	1.01594	1.12712
214.061	0.988884	0.974775	0.988344	0.985057	0.988364	0.988377	1.01347	1.12678
215.235	0.992713	0.984843	0.98912	0.988494	0.993459	0.991188	1.01347	1.12816
216.413	0.991706	0.977082	0.98815	0.990642	0.994439	0.991938	1.01259	1.12539
217.585	0.995132	0.981068	0.991253	0.98699	0.994047	0.99175	1.02001	1.12712
218.753	0.991504	0.980229	0.988732	0.98699	0.993263	0.995124	1.014	1.12799
219.923	0.991907	0.980438	0.99106	0.990642	0.986992	0.993625	1.01824	1.12487
221.095	0.990295	0.979599	0.988926	0.98162	0.991304	0.994562	1.02107	1.12193
222.267	0.995736	0.978341	0.990478	0.986346	0.993263	0.990813	1.01259	1.12747
223.441	0.991907	0.980858	0.990284	0.985272	0.995615	0.996436	1.01859	1.1247
224.614	0.995535	0.977502	0.988732	0.98699	0.991108	0.993625	1.01665	1.12244
225.784	0.992109	0.981068	0.984465	0.980761	0.992087	0.991188	1.01418	1.1247
226.955	0.996341	0.982117	0.990672	0.986346	0.992479	0.995311	1.01435	1.12262
228.128	0.994326	0.977292	0.987181	0.986346	0.986208	0.992125	1.01011	1.11621
229.301	0.994527	0.977712	0.987375	0.989353	0.994047	0.993812	1.01311	1.10998
230.472	0.995132	0.982326	0.987375	0.991071	0.993459	0.996623	1.01753	1.11396
231.644	0.992512	0.984004	0.989508	0.988064	0.986796	0.994562	1.01011	1.115
232.816	0.99493	0.981278	0.98815	0.989568	0.988168	0.991376	1.01665	1.11915
233.986	0.987675	0.980648	0.988926	0.988064	0.994439	0.99681	1.01117	1.11569
235.156	0.995535	0.981068	0.991253	0.98742	0.989344	0.98819	1.011	1.11136
236.328	0.993318	0.982746	0.988344	0.993864	0.992479	0.996623	1.01471	1.11586
237.502	0.990698	0.980019	0.993775	0.988494	0.997379	0.994936	1.01276	1.11413
238.682	0.996139	0.979809	0.986599	0.985701	0.999731	0.99756	1.01205	1.11188
239.852	0.996139	0.978341	0.98912	0.989138	0.993067	0.994187	1.01524	1.11205
241.022	0.991101	0.982326	0.981168	0.993004	0.992087	0.996623	1.01771	1.1098
242.192	0.992512	0.975614	0.989702	0.989782	0.995223	0.995686	1.017	1.10824
243.366	0.989691	0.976033	0.987956	0.987634	0.993655	0.994936	1.01347	1.1079
244.54	0.992109	0.977082	0.990284	0.987849	0.98954	0.990439	1.01771	1.10253
245.715	0.992109	0.980648	0.987181	0.985701	0.988952	0.996436	1.01329	1.1053
246.892	0.992713	0.980019	0.987762	0.98699	0.986012	0.9925	1.01559	1.1001
248.062	0.995132	0.978131	0.98912	0.989782	0.986992	0.9925	1.01471	1.10339
249.234	0.990295	0.97876	0.984465	0.986131	0.993655	0.992688	1.01683	1.09941
250.416	0.991907	0.982117	0.988344	0.988279	0.991892	0.987628	1.01453	1.1001
251.59	0.991303	0.981697	0.990478	0.988923	0.99052	0.993062	1.01223	1.09837
252.763	0.991303	0.983165	0.99009	0.983768	0.988364	0.989127	1.01382	1.09699
253.933	0.996946	0.978341	0.993193	0.985486	0.985424	0.989502	1.01241	1.09855
255.105	0.992512	0.979809	0.990866	0.987205	0.989344	0.994187	1.01577	1.10062
256.276	0.988683	0.97939	0.995326	0.987634	0.989148	0.994749	1.01506	1.0982
257.448	0.99755	0.981068	0.992999	0.985272	0.990716	0.996061	1.014	1.10288
258.624	0.991303	0.979809	0.990672	0.985916	0.991108	0.992688	1.01382	1.09733
259.797	0.991303	0.981278	0.98815	0.984413	0.987384	0.994374	1.01153	1.093
260.967	0.994326	0.97897	0.986211	0.985701	0.986404	0.991188	1.01594	1.09508
262.137	0.996139	0.977292	0.986599	0.985916	0.990324	0.991376	1.00993	1.09179
263.307	0.991504	0.975614	0.987956	0.983768	0.993067	0.989876	1.014	1.09526
264.481	0.991101	0.978341	0.99106	0.983768	0.987188	0.988565	1.01488	1.09733
265.656	0.991101	0.980858	0.990866	0.989568	0.987384	0.995873	1.0117	1.09318
266.831	0.994124	0.979809	0.986987	0.987634	0.989344	0.99756	1.01418	1.09231
268.001	0.992512	0.978341	0.986017	0.986775	0.995223	0.996998	1.01771	1.0911
269.171	0.992915	0.975614	0.98912	0.985701	0.993067	0.998872	1.0094	1.09352
270.344	0.999565	0.980648	0.992223	0.985701	0.99052	0.990064	1.01011	1.09023
271.515	0.995535	0.977921	0.989896	0.982909	0.993459	0.992688	1.00605	1.09248
272.689	0.996341	0.980438	0.992223	0.993649	0.990912	0.994936	1.01011	1.0885
273.862	0.994326	0.982326	0.986793	0.988064	0.998555	0.995686	1.0117	1.08694
275.032	0.992915	0.97939	0.983496	0.98162	0.991696	0.992875	1.01223	1.08867
276.203	0.990295	0.97918	0.986793	0.985486	0.994439	0.998497	1.0094	1.09075
277.371	0.991303	0.974355	0.984659	0.98656	0.995811	0.992313	1.00834	1.09023
278.543	0.99352	0.981278	0.988926	0.98742	0.993263	0.991001	1.01435	1.09058
279.715	0.992713	0.981278	0.989314	0.990642	0.994047	0.994374	1.01223	1.0885
280.888	0.993318	0.980648	0.985047	0.989782	0.988952	0.997935	1.01223	1.08902
282.058	0.992512	0.975194	0.99009	0.98699	0.99052	0.996061	1.00463	1.08452
283.228	0.995736	0.981907	0.989896	0.956489	0.991892	0.991188	1.00658	1.0885
284.402	0.993721	0.978551	0.987568	0.991286	0.991108	0.994187	1.01011	1.08573
285.572	0.99231	0.97897	0.989702	0.985486	0.988756	0.995124	1.00764	1.08677
286.749	0.990295	0.984634	0.991447	0.985701	0.990324	0.993999	1.01011	1.08867
287.922	0.995535	0.985683	0.985629	0.985701	0.992871	0.996998	1.0094	1.08712
289.09	0.992915	0.984634	0.990478	0.983768	0.988756	0.99681	1.00817	1.08538
290.259	0.995938	0.984843	0.988732	0.984198	0.988364	0.992688	1.00587	1.08261

## Sheet: Fig.5 - figure supplement 2b
GBR + 1 μM APP17	GBR + 10 μM APP17	GBR + 1 μM scAPP17	GBR + 10 μM scAPP17	GBR + 1 μM GABA	GBR + 10 μM GABA	mGlu5 + 1 μM DHPG	mGlu5 + 10 μM DHPG
0.669916	0.639699	0.804267	0.788435	0.644156	0.836913	27.1458	75.2586
-0.39516	0.617149	0.400346	-1.17476	-0.728	1.24839	9.74222	27.0213
-0.52985	0.803939	0.089269	-0.42768	-0.40345	0.99826	72.3423	86.8811
1.81313	1.12208	1.60077	0.061589	0.577195	0.665212	22.5655	76.0595
-0.92353	-1.619	-0.66582	-0.92751	0.320808	0.277704	24.6632	73.0186
-0.69375	-0.97629	-1.81667	-1.72347	-0.0865	-0.37694	11.8505	54.671

## Sheet: Fig.5 - figure supplement 2c
	anti-GB2				anti-GB1
	control	GB1a/2			control	GB1a/2
	680	3356			830	1663.25
	671.75	4039.5			904.25	1976
	595	3879.25			778.5	1644.25
	817.75	4598.25			881.5	1797.5
	930.75	4255.25			927.25	1767
	1002.25	3932.5			926.5	1883.75
