# Supplementary material for: Soluble amyloid-β precursor peptide does not regulate GABAB receptor activity
Source: eLife. 2023 Jan 23;12:e82082. doi: 10.7554/eLife.82082 (PMC9917443; doi:10.7554/eLife.82082)
Supplement: Figure 5—source data 1. [file elife-82082-fig5-data1.xlsx]

## Sheet: Fig.5a
Dose-response curve
Log [Agonist] (M)	GABA						APP17						sc-APP17
-8.5	0.276155	0.273961	0.315571	0.263408	0.272994	0.246967	0.306519	0.288035	0.361483	0.378775	0.264935	0.310728	0.282465	0.257732	0.286039	0.314193	0.351582	0.287471
-8	0.503425	0.32092	0.275911	0.326495	0.375391	0.310578	0.317854	0.334749	0.291184	0.361562	0.350954	0.308637	0.339064	0.265113	0.343257	0.363057	0.39395	0.323358
-7.5	0.419228	0.413753	0.319332	0.325662	0.322395	0.321454	0.30907	0.247662	0.3236	0.353574	0.35997	0.320944	0.256367	0.204921	0.332759	0.411578	0.346446	0.283115
-7	0.360605	0.369422	0.424168	0.518039	0.422223	0.466035	0.407581	0.190862	0.334166	0.291385	0.328857	0.300113	0.309752	0.197066	0.329345	0.41083	0.398728	0.336336
-6.5	0.624158	0.551559	0.722805	0.607137	0.65392	0.596145	0.350107	0.325825	0.354862	0.345203	0.311839	0.318978	0.338479	0.281525	0.356569	0.373777	0.381439	0.271493
-6	0.973311	0.800122	0.869493	0.911977	0.955331	0.914911	0.334779	0.29916	0.290008	0.355326	0.365961	0.308251	0.364772	0.285361	0.39316	0.332709	0.450312	0.29419
-5.5	1.00292	0.914853	0.931762	0.898116	1.00164	1.00263	0.379808	0.280348	0.33915	0.358508	0.341967	0.316153	0.260048	0.271791	0.326645	0.351909	0.368272	0.282717
-5	1.05229	0.96143	0.964339	0.80968	1.13647	1.09823	0.328702	0.310437	0.255308	0.434386	0.321439	0.301059	0.31166	0.341641	0.349578	0.404637	0.355134	0.277516
-4.5	0.98005	1.05715	0.872054	1.05263	0.784476	0.992845	0.32656	0.364976	0.326576	0.383922	0.340726	0.298645	0.249492	0.297265	0.270212	0.452902	0.372095	0.310143
-4	0.967663	0.981418	1.16361	1.13769	1.07905	0.908926	0.36748	0.324679	0.36349	0.427745	0.402865	0.357242	0.271539	0.265633	0.321223	0.481605	0.358586	0.330973
Non-linear regression (curve fit)						Linear regression
	GABA						APP17	sc-APP17
log(agonist) vs. response -- Variable slope (four parameters)						Best-fit values
Best-fit values						Slope	0.008385	0.005052
Bottom	0.3176					Y-intercept	0.3833	0.3588
Top	1.001					X-intercept	-45.72	-71.01
LogEC50	-6.47					1/slope	119.3	197.9
HillSlope	1.426
EC50	3.386e-07					Std. Error
Span	0.6838					Slope	0.003652	0.005196
Std. Error						Y-intercept	0.02342	0.03332
Bottom	0.02098
Top	0.01794					95% Confidence Intervals
LogEC50	0.05575					Slope	0.001074 to 0.01570	-0.005348 to 0.01545
HillSlope	0.2346					Y-intercept	0.3365 to 0.4302	0.2921 to 0.4255
Span	0.02957					X-intercept	-314.3 to -27.31	-infinity to -27.39
95% CI (profile likelihood)
Bottom	0.2693 to 0.3593					Goodness of Fit
Top	0.9665 to 1.039					R square	0.08331	0.01604
LogEC50	-6.588 to -6.359					Sy.x	0.04063	0.0578
HillSlope	0.9998 to 2.156
EC50	2.585e-007 to 4.370e-007					Is slope significantly non-zero?
Goodness of Fit						F	5.271	0.9456
Degrees of Freedom	56					DFn, DFd	1, 58	1, 58
R squared	0.9394					P value	0.0253	0.3349
Sum of Squares	0.3387					Deviation from zero?	Significant	Not Significant
Sy.x	0.07777
Normality of Residuals						Equation	Y = 0.008385*X + 0.3833	Y = 0.005052*X + 0.3588
D'Agostino-Pearson omnibus (K2)	1.792
P value	0.4081					Data
Passed normality test (alpha=0.05)?	Yes					Number of X values	60	60
P value summary	ns					Maximum number of Y replicates	6	6
Test for homoscedasticity						Total number of values	60	60
Rs of predicted Y vs. |residual|	0.3042					Number of missing values	0	0
P value (one tailed)	0.0091
Passed (P > 0.05)?	No
Number of points
# of X values	60
# Y values analyzed	60

## Sheet: Fig.5b
GABA															APP17															sc-APP17
	Vehicle						1 µM CGP54626									Vehicle						1 µM CGP54626									Vehicle						1 µM CGP54626
Basal	0.325117	0.302219	0.227703	0.203661	0.285603	0.337138	0.063092	0.109479	0.044331	0.011831	0.092968	0.070325			Basal	0.38831	0.474774	0.268785	0.320908	0.369178	0.424864	0.075686	0.076538	0.032476	-0.01216	0.051782	0.053333			Basal	0.445976	0.472788	0.308843	0.313313	0.423194	0.340117	0.085911	0.084941	0.03025	0.004054	0.074704	0.049977
1μM GABA	0.78968	0.751136	0.65343	0.751407	0.653751	0.821997	0.084372	0.06319	0.054297	0.045053	0.018676	0.022427			1μM APP17	0.445227	0.430279	0.261537	0.395915	0.300129	0.338873	0.069652	0.05305	0.029344	-0.01679	0.042627	0.01691			1μM sc-APP17	0.394405	0.471126	0.293954	0.276884	0.353717	0.355341	0.103122	0.070981	0.064931	0.006747	0.080517	0.002439
10μM GABA	1.13577	1.01104	0.993212	1.19334	0.882757	0.860842	0.122742	0.098843	0.019635	0.060212	0.089879	0.096959			10μM APP17	0.453346	0.4235	0.329009	0.319879	0.356394	0.36883	0.086174	0.068842	0.021703	0.019365	0.092762	0.074237			10μM sc-APP17	0.457051	0.427319	0.364183	0.274221	0.313562	0.390127	0.087065	0.09298	0.023456	0.037852	0.088469	0.065807

## Sheet: Fig.5c
GB1a/2
Dose-response curve
Log [GABA] (M)	Vehicle											10μM APP17											10μM sc-APP17											1μM APP17											1μM sc-APP17
-8	0.511924	0.297725	0.245823	0.3772	0.215173	0.179702	0.158333	0.36313	0.240625	0.321738	0.307939	0.453024	0.464742	0.439685	0.185787	0.269004	0.223043	0.254082	0.407832	0.246102	0.304328	0.455742	0.562647	0.357013	0.289019	0.219137	0.195743	0.176297	0.244492	0.337246	0.272375	0.273977	0.326566	0.488261	0.373662	0.241457	0.185727	0.245816	0.222617	0.294831	0.348299	0.326284	0.338443	0.445069	0.483262	0.465433	0.280206	0.238541	0.22962
-7	0.67126	0.437597	0.36927	0.511247	0.345635	0.441479	0.422541	0.480454	0.500134	0.364608	0.401159	0.543325	0.488409	0.52159	0.475181	0.378065	0.336159	0.336111	0.549444	0.513893	0.406566	0.428005	0.596784	0.393958	0.461381	0.444044	0.363259	0.331151	0.374825	0.478416	0.49102	0.431272	0.298573	0.666102	0.440356	0.326812	0.56446	0.398881	0.372805	0.485913	0.510278	0.563313	0.415084	0.40101	0.539154	0.410685	0.354833	0.416915	0.362338
-6.5	0.884309	0.687023	0.499222	0.615558	0.508263	0.68855	0.568153	0.667981	0.678973	0.604535	0.560518	0.672324	0.660977	0.561071	0.546514	0.574908	0.638729	0.606184	0.69382	0.602619	0.539727	0.672756	0.91794	0.590512	0.598677	0.630958	0.628264	0.657649	0.494361	0.715115	0.614721	0.653655	0.463945	0.884014	0.826251	0.670593	0.735143	0.536428	0.671112	0.661602	0.612232	0.634345	0.654658	0.606537	0.867873	0.838634	0.547027	0.613164	0.563442
-6	0.926599	0.972038	0.678155	0.856022	0.687221	0.997778	0.83495	0.801044	0.933594	0.874778	0.849527	0.858526	0.817142	0.721876	0.781891	0.782862	0.734254	0.793114	0.9006	0.826394	0.771092	0.914815	1.07762	0.676959	0.778679	0.929602	0.904225	0.922475	0.866836	0.884301	0.759047	0.74277	0.715769	0.871066	1.00777	0.82459	0.890197	0.739793	0.920443	0.748501	0.881088	0.937038	0.674904	0.750472	1.01092	1.09682	0.776889	0.654218	0.582395
-5.5	1.02127	1.0261	0.943111	0.736719	0.851828	1.05533	1.27336	0.777445	0.993166	0.752487	0.917481	0.924135	0.909267	0.971329	0.834678	0.886634	0.897935	0.846603	0.847216	0.818125	1.083	0.901991	1.17935	0.969364	0.93616	1.00044	0.900798	0.905534	0.952219	0.930309	1.11695	0.856586	1.01875	1.00574	1.31473	1.04181	0.928701	0.927189	0.888354	1.01147	0.927316	1.1406	0.908266	1.16839	0.949541	0.766934	0.757344	0.957233	1.01632
-5	1.11833	1.1568	1.07567	0.856494	0.818493	1.00719	0.868046	0.93687	1.05265	0.890918	1.01259	0.876601	0.982991	0.96808	0.978821	0.994752	0.955291	0.925241	0.959765	0.835116	1.10824	0.984283	1.02978	1.15482	0.987133	1.06514	1.01903	1.00407	0.96785	0.942996	1.02927	1.01775	0.883073	0.973428	1.33651	1.20346	1.07323	1.00257	1.1769	0.967343	1.02949	0.845458	1.09204	1.18294	0.945264	1.15631	1.36828	0.894912	1.14413
-4.5	1.05154	1.11011	1.2748	0.885121	0.989038	0.998281	0.865907	0.944873	1.0834	0.756245	0.485223	0.946351	0.864597	1.07488	0.764131	0.922591	1.15445	0.9302	0.989733	0.894476	0.86526	0.645053	1.15854	0.713298	0.978923	0.847398	0.848762	0.91034	0.951225	1.09238	1.04797	0.911787	0.620735	0.964871	0.95942	0.976992	0.987057	1.18446	0.914529	0.957351	1.05475	0.927968	0.984233	0.649126	1.0465	1.09449	0.8742	0.852539	1.0547
-4	1.05081	1.03379	1.11738	1.14981	0.919623	0.927394	0.808721	1.0783	0.967928	0.922131	0.973807	1.08398	0.98057	0.970532	0.935357	0.923001	0.952352	0.924634	1.06592	0.979827	0.856078	1.06378	1.08975	1.14839	1.01462	0.930626	1.05465	1.19732	1.09913	1.02645	0.94011	0.961997	0.915045	1.02359	0.810014	0.927106	1.05415	1.06677	0.919093	0.93672	0.97578	0.950664	0.987638	0.930908	0.922794	0.980558	1.11082	1.20442	0.861149
-3.5	1.17382	0.957716	0.710452	0.986799	0.871757	0.997381	1.1273	0.972736	0.993318	0.865725	0.969133	0.885436	1.00006	0.950608	1.06272	0.865355	1.19627	1.00494	1.00947	1.06192	1.23316	0.984106	1.0101	0.854526	1.01986	0.977236	0.842855	0.86961	0.884636	1.02268	1.02877	1.06564	1.04333	1.05649	0.940126	1.04991	1.0396	0.790545	1.04412	1.04085	1.02273	1.09983	0.942395	1.08919	1.15752	0.958861	0.997276	0.989698	1.05858
-3	0.775366	1.00849	1.17217	0.863394	1.20862	1.07522	1.06398	0.948965	1.03875	1.21214	1.05706	1.03059	1.01937	1.07886	1.00192	1.21164	0.851381	1.07042	0.924605	0.958254	0.910759	0.952117	0.900153	0.997088	0.965524	1.09214	1.10249	0.933065	1.01623	0.950873	1.03112	0.972367	1.04163	0.91992	1.24986	1.02299	0.906248	1.14269	1.03679	1.02243	1.00149	0.949508	1.06997	0.979901	0.91969	1.06058	0.89191	0.805887	1.08027
Non-linear regression (curve fit) - values for table
	Vehicle	10μM APP17	10μM sc-APP17	1μM APP17	1μM sc-APP17	Global (shared)
Comparison of Fits
Null hypothesis						One curve for all data sets
Alternative hypothesis						Different curve for each data set
P value						0.5767
Conclusion (alpha = 0.05)						Do not reject null hypothesis
Preferred model						One curve for all data sets
F (DFn, DFd)						0.8937 (16, 530)
Different curve for each data set
Best-fit values
Bottom	0.2793	0.3136	0.2911	0.3131	0.2834
Top	0.9908	0.9838	0.9902	1.014	0.9836
LogEC50	-6.524	-6.42	-6.487	-6.522	-6.454
HillSlope	1.112	0.9672	1.274	1.208	1.016
EC50	2.995e-07	3.8e-07	3.259e-07	3.005e-07	3.517e-07
Span	0.7115	0.6701	0.699	0.701	0.7002
Std. Error
Bottom	0.04665	0.03529	0.03456	0.03871	0.05047
Top	0.0182	0.01419	0.01434	0.01549	0.0201
LogEC50	0.09195	0.08025	0.06617	0.07485	0.1068
HillSlope	0.2213	0.1463	0.2074	0.2117	0.2144
Span	0.05286	0.04076	0.03915	0.04374	0.05789
95% CI (profile likelihood)
Bottom	0.1622 to 0.3653	0.2271 to 0.3779	0.2165 to 0.3562	0.2293 to 0.3850	0.1546 to 0.3711
Top	0.9558 to 1.029	0.9559 to 1.015	0.9625 to 1.019	0.9847 to 1.044	0.9442 to 1.029
LogEC50	-6.743 to -6.346	-6.598 to -6.269	-6.627 to -6.355	-6.685 to -6.371	-6.700 to -6.253
HillSlope	0.7229 to 1.713	0.6823 to 1.351	0.9365 to 1.767	0.8885 to 1.659	0.6329 to 1.615
EC50	1.809e-007 to 4.510e-007	2.521e-007 to 5.379e-007	2.359e-007 to 4.412e-007	2.065e-007 to 4.254e-007	1.996e-007 to 5.589e-007
Goodness of Fit
Degrees of Freedom	106	106	106	106	106
R squared	0.794	0.869	0.8563	0.8342	0.773
Sum of Squares	1.721	0.8851	1.156	1.322	1.891
Sy.x	0.1274	0.09138	0.1044	0.1117	0.1335
Normality of Residuals
D'Agostino-Pearson omnibus (K2)	8.721	4.823	5.654	7.968	18.11
P value	0.0128	0.0897	0.0592	0.0186	0.0001
Passed normality test (alpha=0.05)?	No	Yes	Yes	No	No
P value summary	*	ns	ns	*	***
Test for homoscedasticity
Rs of predicted Y vs. |residual|	0.132	-0.04919	0.02467	-0.05876	-0.1095
P value (one tailed)	0.0846	0.3049	0.399	0.271	0.1274
Passed (P > 0.05)?	Yes	Yes	Yes	Yes	Yes
One curve for all data sets
Best-fit values
Bottom	0.2985	0.2985	0.2985	0.2985	0.2985	0.2985
Top	0.9909	0.9909	0.9909	0.9909	0.9909	0.9909
LogEC50	-6.483	-6.483	-6.483	-6.483	-6.483	-6.483
HillSlope	1.133	1.133	1.133	1.133	1.133	1.133
EC50	3.287e-07	3.287e-07	3.287e-07	3.287e-07	3.287e-07	3.287e-07
Span	0.6924	0.6924	0.6924	0.6924	0.6924	0.6924
Std. Error
Bottom	0.01814	0.01814	0.01814	0.01814	0.01814	0.01814
Top	0.00732	0.00732	0.00732	0.00732	0.00732	0.00732
LogEC50	0.03687	0.03687	0.03687	0.03687	0.03687	0.03687
HillSlope	0.09176	0.09176	0.09176	0.09176	0.09176	0.09176
Span	0.02063	0.02063	0.02063	0.02063	0.02063	0.02063
95% CI (profile likelihood)
Bottom	0.2610 to 0.3328	0.2610 to 0.3328	0.2610 to 0.3328	0.2610 to 0.3328	0.2610 to 0.3328	0.2610 to 0.3328
Top	0.9768 to 1.005	0.9768 to 1.005	0.9768 to 1.005	0.9768 to 1.005	0.9768 to 1.005	0.9768 to 1.005
LogEC50	-6.558 to -6.412	-6.558 to -6.412	-6.558 to -6.412	-6.558 to -6.412	-6.558 to -6.412	-6.558 to -6.412
HillSlope	0.9664 to 1.330	0.9664 to 1.330	0.9664 to 1.330	0.9664 to 1.330	0.9664 to 1.330	0.9664 to 1.330
EC50	2.768e-007 to 3.877e-007	2.768e-007 to 3.877e-007	2.768e-007 to 3.877e-007	2.768e-007 to 3.877e-007	2.768e-007 to 3.877e-007	2.768e-007 to 3.877e-007
Goodness of Fit
Degrees of Freedom						546
R squared	0.7935	0.8615	0.8546	0.8231	0.7692	0.819
Sum of Squares	1.725	0.9359	1.169	1.41	1.922	7.162
Sy.x						0.1145
Normality of Residuals
D'Agostino-Pearson omnibus (K2)	8.583	4.408	5.12	8.47	18.01	37.32
P value	0.0137	0.1104	0.0773	0.0145	0.0001	<0.0001
Passed normality test (alpha=0.05)?	No	Yes	Yes	No	No	No
P value summary	*	ns	ns	*	***	****
Constraints
Bottom	Bottom is shared	Bottom is shared	Bottom is shared	Bottom is shared	Bottom is shared
Top	Top is shared	Top is shared	Top is shared	Top is shared	Top is shared
LogEC50	LogEC50 is shared	LogEC50 is shared	LogEC50 is shared	LogEC50 is shared	LogEC50 is shared
HillSlope	HillSlope is shared	HillSlope is shared	HillSlope is shared	HillSlope is shared	HillSlope is shared
Test for homoscedasticity
Rs of predicted Y vs. |residual|	0.126	-0.05846	0.006429	-0.0456	-0.1479	-0.02073
P value (one tailed)	0.0947	0.272	0.4734	0.3181	0.0616	0.3138
Passed (P > 0.05)?	Yes	Yes	Yes	Yes	Yes	Yes
Number of points
# of X values	110	110	110	110	110
# Y values analyzed	110	110	110	110	110
[truncated: 6 more columns]

## Sheet: Fig.5d
GB1a/2 + APP
Dose-response curve
Log [GABA] (M)	Vehicle											10μM APP17											10μM sc-APP17											1μM APP17											1μM sc-APP17
-8	0.424933	0.268383	0.171954	0.433831	0.205096	0.229679	0.171961	0.349179	0.233691	0.250935	0.290171	0.413201	0.428923	0.414605	0.303556	0.22605	0.269376	0.224995	0.370319	0.311041	0.411075	0.368551	0.324022	0.368709	0.164629	0.358509	0.234508	0.208275	0.234585	0.372297	0.239605	0.25923	0.315207	0.368898	0.380637	0.248877	0.204139	0.188835	0.252788	0.201262	0.368067	0.295754	0.416084	0.473067	0.45383	0.532326	0.236085	0.375936	0.198552
-7	0.554333	0.513692	0.232378	0.321254	0.291027	0.323033	0.329538	0.466218	0.447783	0.276423	0.426801	0.472098	0.577561	0.355329	0.426405	0.366942	0.381326	0.347807	0.523664	0.474517	0.542324	0.49329	0.482644	0.516961	0.307563	0.439288	0.262425	0.322161	0.291362	0.476381	0.497697	0.298419	0.382152	0.530174	0.64804	0.323122	0.426918	0.329239	0.43483	0.30069	0.451377	0.413031	0.661711	0.505832	0.458703	0.579502	0.3029	0.525618	0.328359
-6.5	0.772133	0.574651	0.474905	0.681563	0.422947	0.542654	0.51685	0.622498	0.655439	0.571201	0.393684	0.839336	0.686976	0.504461	0.716304	0.482387	0.624148	0.464557	0.651175	0.609934	0.611468	0.797993	0.84431	0.640899	0.55176	0.673567	0.412912	0.581089	0.414683	0.70844	0.656636	0.480792	0.524898	0.833075	0.522065	0.499968	0.769298	0.51817	0.595248	0.546424	0.723515	0.675807	0.688291	0.6071	0.625971	0.624412	0.419855	0.660459	0.485321
-6	0.970834	0.739281	0.526993	0.715246	0.564842	0.683244	0.588078	0.850823	0.903572	0.656142	0.686321	0.780465	0.525236	0.746599	0.992487	0.749827	0.817995	0.772114	0.941452	0.901363	1.03462	0.88671	0.897512	0.759515	0.690421	0.748702	0.748012	0.696806	0.729508	0.883289	0.860363	0.77636	0.755324	0.918452	0.927915	0.5751	0.772417	0.680938	0.940352	0.783854	0.935946	0.682131	1.04123	0.92631	0.675091	0.770884	0.637089	0.71946	0.725365
-5.5	1.15103	1.04416	0.707801	0.861311	0.851367	0.844288	0.701443	0.887102	1.0939	0.856801	0.867982	1.00423	0.340629	0.929351	0.985236	0.910205	1.00579	0.744874	0.932855	1.03641	1.08795	1.09286	0.904336	0.882788	0.737529	0.9172	0.831988	1.04077	0.67286	0.9733	0.859648	0.752376	0.91285	0.92905	1.13332	0.838661	0.999596	0.769159	0.859755	0.663142	0.908098	0.917912	1.23039	0.928148	0.989084	0.916017	0.715059	0.740158	0.911097
-5	1.04249	1.24274	0.927494	0.942527	0.900755	0.92046	0.865659	1.02104	1.21407	1.021	0.827723	0.902189	0.53397	0.888377	0.973754	0.903767	1.02061	0.84933	1.01577	1.08239	0.828376	0.993634	1.14478	1.05595	0.944772	0.99306	0.915741	1.08884	0.839822	1.00241	1.13446	0.987925	0.990646	0.98535	1.11552	0.66865	0.969973	0.967681	0.947666	0.716464	0.993819	0.974456	1.08988	1.12963	0.94811	1.35605	0.804685	0.835265	0.905323
-4.5	1.14199	1.05103	0.760252	0.825194	0.995469	0.938151	0.838228	1.06124	1.06686	0.700833	0.836178	1.04194	0.447662	0.753179	0.933329	1.00508	1.12106	1.04195	1.00081	1.03919	1.11995	0.942827	1.299	1.10531	0.847393	1.04188	0.990203	1.19075	0.927537	1.04766	1.00668	0.814675	0.856911	1.08202	1.04675	0.676182	0.97562	0.778845	0.98966	0.724542	1.05353	1.04619	1.00163	1.15751	0.870509	1.30805	0.928444	0.938825	1.04428
-4	1.12148	0.676522	0.919934	0.84142	0.925426	0.952668	0.852566	0.985847	0.903556	0.999501	0.939724	0.994699	0.93288	0.837726	0.955717	0.962397	0.905129	0.946628	0.994058	0.989506	1.07409	0.818017	0.972904	0.844653	0.946437	1.04852	0.948125	1.02502	1.00886	1.01952	1.00838	1.00058	1.04446	1.06578	1.03817	1.01975	1.14276	0.906334	1.02794	0.894945	1.00242	0.940378	1.02994	0.995126	1.0713	0.899433	0.995092	1.06947	1.00088
-3.5	0.939555	1.10291	0.954004	0.962642	0.954644	1.0325	1.01212	1.04062	1.08796	0.908923	1.06995	1.03309	1.09065	1.12858	0.992608	0.992511	1.03679	1.09912	1.05078	0.977195	1.16755	1.03764	0.976368	1.07021	0.959754	1.0353	0.93669	1.08778	0.825087	1.06627	0.95829	0.956871	1.03957	0.985569	0.957556	0.980568	1.06064	1.04356	0.950122	1.03544	1.03672	1.13	1.04045	0.914854	1.02864	0.908498	0.854434	1.05966	0.954203
-3	0.938962	1.22057	1.12606	1.19594	1.11993	1.01483	1.13531	0.973531	1.00848	1.09158	0.990328	0.972216	0.976471	1.03369	1.05167	1.04509	1.05808	0.954249	0.955165	1.0333	0.758366	1.14435	1.05073	1.08514	1.09381	0.916174	1.11518	0.887198	1.16606	0.914211	1.03333	1.04255	0.915968	0.948649	1.00428	0.999684	0.7966	1.05011	1.02194	1.06961	0.960862	0.929622	0.929611	1.09002	0.900066	1.19207	1.15047	0.870872	1.04492
Non-linear regression (curve fit) - values for table
	Vehicle	10μM APP17	10μM sc-APP17	1μM APP17	1μM sc-APP17	Global (shared)
Comparison of Fits
Null hypothesis						One curve for all data sets
Alternative hypothesis						Different curve for each data set
P value						0.2645
Conclusion (alpha = 0.05)						Do not reject null hypothesis
Preferred model						One curve for all data sets
F (DFn, DFd)						1.198 (16, 530)
Different curve for each data set
Best-fit values
Bottom	0.252	0.3131	0.2517	0.2872	0.3069
Top	0.9987	0.9813	1.01	0.9903	1.013
LogEC50	-6.301	-6.467	-6.358	-6.504	-6.235
HillSlope	0.9157	0.993	0.9235	1.007	0.9757
EC50	4.995e-07	3.413e-07	4.389e-07	3.133e-07	5.822e-07
Span	0.7467	0.6682	0.7588	0.7032	0.7061
Std. Error
Bottom	0.046	0.05096	0.03827	0.04603	0.03902
Top	0.01995	0.01993	0.01592	0.01758	0.01808
LogEC50	0.09897	0.1136	0.07953	0.096	0.08858
HillSlope	0.1628	0.2182	0.1327	0.1899	0.1649
Span	0.05423	0.05842	0.04471	0.0525	0.04631
95% CI (profile likelihood)
Bottom	0.1347 to 0.3346	0.1518 to 0.4030	0.1674 to 0.3192	0.1687 to 0.3698	0.2198 to 0.3774
Top	0.9608 to 1.044	0.9417 to 1.033	0.9801 to 1.044	0.9564 to 1.028	0.9792 to 1.050
LogEC50	-6.527 to -6.112	-6.779 to -6.256	-6.525 to -6.206	-6.736 to -6.323	-6.425 to -6.060
HillSlope	0.6119 to 1.316	0.5528 to 1.696	0.6987 to 1.214	0.6665 to 1.507	0.7119 to 1.337
EC50	2.970e-007 to 7.722e-007	1.664e-007 to 5.543e-007	2.987e-007 to 6.224e-007	1.839e-007 to 4.758e-007	3.754e-007 to 8.709e-007
Goodness of Fit
Degrees of Freedom	106	106	106	106	106
R squared	0.8285	0.759	0.8807	0.811	0.8434
Sum of Squares	1.561	1.83	1.031	1.465	1.332
Sy.x	0.1213	0.1314	0.0986	0.1176	0.1121
Normality of Residuals
D'Agostino-Pearson omnibus (K2)	0.4295	53.48	1.649	3.424	16.97
P value	0.8067	<0.0001	0.4385	0.1805	0.0002
Passed normality test (alpha=0.05)?	Yes	No	Yes	Yes	No
P value summary	ns	****	ns	ns	***
Test for homoscedasticity
Rs of predicted Y vs. |residual|	-0.02806	-0.08966	-0.05517	-0.2292	-0.1396
P value (one tailed)	0.3855	0.1758	0.2835	0.008	0.0729
Passed (P > 0.05)?	Yes	Yes	Yes	No	Yes
One curve for all data sets
Best-fit values
Bottom	0.2794	0.2794	0.2794	0.2794	0.2794	0.2794
Top	0.9993	0.9993	0.9993	0.9993	0.9993	0.9993
LogEC50	-6.376	-6.376	-6.376	-6.376	-6.376	-6.376
HillSlope	0.9379	0.9379	0.9379	0.9379	0.9379	0.9379
EC50	4.205e-07	4.205e-07	4.205e-07	4.205e-07	4.205e-07	4.205e-07
Span	0.7199	0.7199	0.7199	0.7199	0.7199	0.7199
Std. Error
Bottom	0.02025	0.02025	0.02025	0.02025	0.02025	0.02025
Top	0.008342	0.008342	0.008342	0.008342	0.008342	0.008342
LogEC50	0.04388	0.04388	0.04388	0.04388	0.04388	0.04388
HillSlope	0.07542	0.07542	0.07542	0.07542	0.07542	0.07542
Span	0.02357	0.02357	0.02357	0.02357	0.02357	0.02357
95% CI (profile likelihood)
Bottom	0.2370 to 0.3168	0.2370 to 0.3168	0.2370 to 0.3168	0.2370 to 0.3168	0.2370 to 0.3168	0.2370 to 0.3168
Top	0.9831 to 1.016	0.9831 to 1.016	0.9831 to 1.016	0.9831 to 1.016	0.9831 to 1.016	0.9831 to 1.016
LogEC50	-6.464 to -6.293	-6.464 to -6.293	-6.464 to -6.293	-6.464 to -6.293	-6.464 to -6.293	-6.464 to -6.293
HillSlope	0.7969 to 1.101	0.7969 to 1.101	0.7969 to 1.101	0.7969 to 1.101	0.7969 to 1.101	0.7969 to 1.101
EC50	3.432e-007 to 5.094e-007	3.432e-007 to 5.094e-007	3.432e-007 to 5.094e-007	3.432e-007 to 5.094e-007	3.432e-007 to 5.094e-007	3.432e-007 to 5.094e-007
Goodness of Fit
Degrees of Freedom						546
R squared	0.8211	0.7497	0.8781	0.8024	0.8393	0.8204
Sum of Squares	1.628	1.9	1.053	1.532	1.367	7.48
Sy.x						0.117
Normality of Residuals
D'Agostino-Pearson omnibus (K2)	0.5458	52.89	1.712	2.801	18.45	37.94
P value	0.7612	<0.0001	0.4248	0.2465	<0.0001	<0.0001
Passed normality test (alpha=0.05)?	Yes	No	Yes	Yes	No	No
P value summary	ns	****	ns	ns	****	****
Constraints
Bottom	Bottom is shared	Bottom is shared	Bottom is shared	Bottom is shared	Bottom is shared
Top	Top is shared	Top is shared	Top is shared	Top is shared	Top is shared
LogEC50	LogEC50 is shared	LogEC50 is shared	LogEC50 is shared	LogEC50 is shared	LogEC50 is shared
HillSlope	HillSlope is shared	HillSlope is shared	HillSlope is shared	HillSlope is shared	HillSlope is shared
Test for homoscedasticity
Rs of predicted Y vs. |residual|	-0.08488	-0.1394	-0.05108	-0.2114	-0.1154	-0.1241
P value (one tailed)	0.189	0.0732	0.2981	0.0133	0.115	0.0018
Passed (P > 0.05)?	Yes	Yes	Yes	No	Yes	No
Number of points
# of X values	110	110	110	110	110
# Y values analyzed	110	110	110	110	110
[truncated: 6 more columns]
