# Supplementary material for: Soluble amyloid-β precursor peptide does not regulate GABAB receptor activity
Source: eLife. 2023 Jan 23;12:e82082. doi: 10.7554/eLife.82082 (PMC9917443; doi:10.7554/eLife.82082)
Supplement: Figure 6—source data 1. [file elife-82082-fig6-data1.xlsx]

## Sheet: Fig.6a
				5 µM sc-APP17							5 µM sc-APP17
GB2
vGluT1
PSD95
Merge

## Sheet: Fig.6b
	APP17	scAPP17
	1015.51	679.922
	1240.16	927.229
	862.601	1839.35
	1492.05	1590.98
	772.941	1200.34
	846.008	1702.03
	655.041	2056.76
	1240.9	1544.48
	894.511	1171.19
	1272	927.58
	1231.95	849.044
	1361.45	576.843
	1471.45	881.634
	1715.54	501.42
	1786.85	1322.35
	1382.44	815.625
	1785.12	882.536
	1699.4	583.921
	1083.24	476.53
	1106.28	529.404
	566.12	611.431
	1439.41	764.952
	1600.56	754.624
	536.483	527.1
	600.006	448.311
	604.786	704.795
	444.539	676.323
	655.856	949.352
	491.595
	480.933
