# Supplementary material for: Soluble amyloid-β precursor peptide does not regulate GABAB receptor activity
Source: eLife. 2023 Jan 23;12:e82082. doi: 10.7554/eLife.82082 (PMC9917443; doi:10.7554/eLife.82082)
Supplement: Figure 7—source data 1. [file elife-82082-fig7-data1.xlsx]

## Sheet: Fig.7
Dose-response curve
Log [GABA] (M)	Vehicle									1 μM APP17
-9	0.906542	1.06455	1.03188	0.877234	0.981303	1.10967	1.028	0.982	0.973	0.934934	0.996844	1.13725	1.0148	1.00505	1.01096	0.871	0.916	0.94
-8	1.02137	0.936468	0.959799	0.989571		0.956354	0.952		1.015	0.937224	1.00126	1.04763		1.04976	1.02761	0.934		0.936
-7.5	1.02185	1.00874	1.02518	0.950797	1.02497	0.94749				1.02016	0.99609	0.927692		0.977113	0.980638
-7	1.03128	0.997701	1.08282	1.06781	1.00936	0.992477	1.021	1.018	1.015	1.05932	0.998027	0.920835		1.01526	1.03775		0.925	0.879
-6.5	1.07356	0.985157	0.923099	0.995356	1.05636	1.02136				1.01644	1.04516	0.986798		1.11825	1.08405
-6	1.08346	1.03852	0.993628	1.06662	1.07427	0.997425		1.013	1.015	1.04408	1.10219	0.962672		1.10962	1.07682		0.967	0.958
-5.5	1.0742	0.943459	1.12638	0.972943	1.15817	1.11116				1.04272	1.09882	1.03898		1.14776	1.1828
-5	1.14624	1.1497	1.13584	1.07953	1.16853	1.19273	1.081	1.314	1.255	1.15003	1.07593	1.06262		1.16908	1.18945	1.053	1.223	1.171
-4.5	1.27246	1.07132	1.20677	1.07704	1.23552	1.14701				1.25642	1.17557	1.118		1.25848	1.25423
-4	1.35748	1.25873	1.27271		1.29961	1.29652	1.172	1.298	1.386	1.32891	1.2991	1.22529		1.33323	1.34759	1.187	1.434	1.327
-3	1.3589	1.31339	1.29159	1.46463	1.24541	1.35543				1.29526	1.31453	1.28212			1.48574
Non-linear regression (curve fit) - values for table
	Vehicle	1 μM APP17	Global (shared)
Comparison of Fits
Null hypothesis			One curve for all data sets
Alternative hypothesis			Different curve for each data set
P value			0.9138
Conclusion (alpha = 0.05)			Do not reject null hypothesis
Preferred model			One curve for all data sets
F (DFn, DFd)			0.2424 (4, 142)
Different curve for each data set
Best-fit values
Bottom	0.9919	0.9821
Top	1.369	1.385
LogEC50	-4.725	-4.786
HillSlope	0.6543	0.6558
EC50	1.882e-05	1.637e-05
Span	0.3771	0.4027
Std. Error
Bottom	0.01349	0.01489
Top	0.0437	0.05205
LogEC50	0.2081	0.2278
HillSlope	0.1628	0.1713
Span	0.05003	0.05873
95% CI (profile likelihood)
Bottom	0.9587 to 1.016	0.9454 to 1.010
Top	1.302 to 1.529	1.310 to 1.557
LogEC50	-5.084 to -4.022	-5.166 to -4.099
HillSlope	0.3712 to 1.054	0.3716 to 1.096
EC50	8.243e-006 to 9.501e-005	6.817e-006 to 7.965e-005
Goodness of Fit
Degrees of Freedom	76	66
R squared	0.7869	0.7917
Sum of Squares	0.2946	0.2839
Sy.x	0.06226	0.06558
Normality of Residuals
D'Agostino-Pearson omnibus (K2)	1.055	1.491
P value	0.59	0.4746
Passed normality test (alpha=0.05)?	Yes	Yes
P value summary	ns	ns
Test for homoscedasticity
Rs of predicted Y vs. |residual|	0.1017	0.1493
P value (one tailed)	0.1846	0.1087
Passed (P > 0.05)?	Yes	Yes
One curve for all data sets
Best-fit values
Bottom	0.9874	0.9874	0.9874
Top	1.375	1.375	1.375
LogEC50	-4.762	-4.762	-4.762
HillSlope	0.6587	0.6587	0.6587
EC50	1.73e-05	1.73e-05	1.73e-05
Span	0.3874	0.3874	0.3874
Std. Error
Bottom	0.00987	0.00987	0.00987
Top	0.03269	0.03269	0.03269
LogEC50	0.1501	0.1501	0.1501
HillSlope	0.117	0.117	0.117
Span	0.03721	0.03721	0.03721
95% CI (profile likelihood)
Bottom	0.9652 to 1.006	0.9652 to 1.006	0.9652 to 1.006
Top	1.323 to 1.461	1.323 to 1.461	1.323 to 1.461
LogEC50	-5.020 to -4.393	-5.020 to -4.393	-5.020 to -4.393
HillSlope	0.4546 to 0.9261	0.4546 to 0.9261	0.4546 to 0.9261
EC50	9.559e-006 to 4.050e-005	9.559e-006 to 4.050e-005	9.559e-006 to 4.050e-005
Goodness of Fit
Degrees of Freedom			146
R squared	0.7856	0.7902	0.7879
Sum of Squares	0.2964	0.286	0.5824
Sy.x			0.06316
Normality of Residuals
D'Agostino-Pearson omnibus (K2)	1.381	1.393	0.0005933
P value	0.5014	0.4984	0.9997
Passed normality test (alpha=0.05)?	Yes	Yes	Yes
P value summary	ns	ns	ns
Constraints
Bottom	Bottom is shared	Bottom is shared
Top	Top is shared	Top is shared
LogEC50	LogEC50 is shared	LogEC50 is shared
HillSlope	HillSlope is shared	HillSlope is shared
Test for homoscedasticity
Rs of predicted Y vs. |residual|	0.08095	0.1596	0.1325
P value (one tailed)	0.2377	0.0934	0.0531
Passed (P > 0.05)?	Yes	Yes	Yes
Number of points
# of X values	99	99
# Y values analyzed	80	70
