# Supplementary material for: Soluble amyloid-β precursor peptide does not regulate GABAB receptor activity
Source: eLife. 2023 Jan 23;12:e82082. doi: 10.7554/eLife.82082 (PMC9917443; doi:10.7554/eLife.82082)
Supplement: Figure 8—figure supplement 1—source data 1. [file elife-82082-fig8-figsupp1-data1.xlsx]

## Sheet: Fig.8 - figure supplement 1a
Trace 5 µM APP17 / 5 µM GABA / 5µM APP17 + 5 µM GABA						Column graph
Time (min)						5 µM APP17	5 µM GABA	5 µM APP17 + 5 µM GABA
0	0.627994					0.521547	23.4958	18.1235
0.005	-0.51731					-0.23951	4.79828	5.75992
0.01	-0.37011					0.877786	52.2243	36.8594
0.015	0.035594					2.00595	60.9381	48.8741
0.02	-0.14033					-0.70714	52.2945	42.1169
0.025	0.383854					-0.25664	9.12821	5.99016
0.03	-0.60707					0.016394	69.9682	65.7053
0.035	0.768016
0.04	0.021233
0.045	-0.14033
0.05	-0.30907
0.055	-0.84403
0.06	-0.16187
0.065	0.236651
0.07	-0.85839
0.075	0.850593
0.08	-1.08817
0.085	-0.35575
0.09	0.143303
0.095	-0.10802
0.1	-0.99123
0.105	-0.61784
0.11	-0.86916
0.115	-0.33421
0.12	-0.27317
0.125	-0.02185
0.13	-0.24086
0.135	-0.47064
0.14	0.179206
0.145	-0.47782
0.15	0.146894
0.155	0.028414
0.16	0.168435
0.165	-0.53167
0.17	-0.1152
0.175	0.10381
0.18	-0.49577
0.185	0.057136
0.19	-0.07211
0.195	0.34436
0.2	-0.9302
0.205	-0.30548
0.21	-0.00031
0.215	0.631585
0.22	0.057136
0.225	-0.23368
0.23	0.082268
0.235	0.161255
0.24	0.197158
0.245	0.125352
0.25	-0.99841
0.255	-0.58912
0.26	-0.4491
0.265	-0.35934
0.27	-0.1511
0.275	-0.23009
0.28	-0.06852
0.285	-0.20855
0.29	-0.14033
0.295	-0.44551
0.3	-0.21932
0.305	-0.40242
0.31	0.150484
0.315	0.426937
0.32	-0.35216
0.325	0.200748
0.33	-0.24445
0.335	0.189977
0.34	0.290506
0.345	-0.06134
0.35	0.003282
0.355	-0.14392
0.36	0.143303
0.365	-0.72914
0.37	-0.04698
0.375	-0.187
0.38	0.290506
0.385	1.09832
0.39	-0.08289
0.395	-0.35575
0.4	0.22229
0.405	0.782377
0.41	0.017643
0.415	-0.37729
0.42	0.121762
0.425	-0.10802
0.43	-0.30189
0.435	0.247422
0.44	0.193568
0.445	1.28502
0.45	-0.45628
0.455	-0.84044
0.46	0.164845
0.465	-0.28753
0.47	0.10022
0.475	0.272554
0.48	0.024823
0.485	0.638765
0.49	-0.57476
0.495	0.193568
0.5	-0.19059
0.505	-0.39883
0.51	0.053546
0.515	-0.40242
0.52	0.502334
0.525	-0.40242
0.53	-0.36652
0.535	-0.5604
0.54	-0.05057
0.545	0.721342
0.55	-0.26599
0.555	0.240242
0.56	0.33718
0.565	0.505924
0.57	0.900857
0.575	0.189977
0.58	0.006872
0.585	-0.39524
0.59	-0.01108
0.595	0.355131
0.6	0.538237
0.605	0.132532
0.61	0.207929
0.615	-0.01108
0.62	0.714162
0.625	0.053546
0.63	0.319228
0.635	0.035594
0.64	0.035594
0.645	0.452069
0.65	0.042775
0.655	0.021233
0.66	-0.4096
0.665	-0.2265
0.67	0.125352
0.675	-0.8548
0.68	-0.78299
0.685	-0.09366
0.69	0.179206
0.695	0.233061
0.7	0.631585
0.705	0.358722
0.71	0.132532
0.715	0.032004
0.72	-0.01826
0.725	0.764426
0.73	0.412576
0.735	0.775197
0.74	0.782377
0.745	-0.17264
0.75	-0.5604
0.755	-0.14751
0.76	-0.22291
0.765	-0.36652
0.77	0.006872
0.775	-0.73991
0.78	-0.71837
0.785	-0.80813
0.79	-0.09725
0.795	0.22588
0.8	-0.48141
0.805	0.014052
0.81	0.211519
0.815	0.22229
0.82	-0.06493
0.825	-0.47423
0.83	-0.18341
0.835	-0.13315
0.84	-0.78659
0.845	-0.04698
0.85	-0.51731
0.855	0.143303
0.86	-0.46705
0.865	-0.57117
0.87	-0.27676
0.875	-0.47782
0.88	-0.26958
0.885	-0.14751
0.89	-0.00031
0.895	-0.67529
0.9	-0.27676
0.905	-0.61425
0.91	-0.34498
0.915	0.254603
0.92	0.505924
0.925	-0.63579
0.93	-0.04339
0.935	1.17013
0.94	0.085859
0.945	0.45925
0.95	0.315638
0.955	0.505924
0.96	-0.02903
0.965	0.434118
0.97	-0.20496
0.975	-0.02903
0.98	0.006872
0.985	-0.30907
0.99	0.312048
0.995	-0.10802
1	-0.10443
1.005	-0.09366
1.01	-0.46705
1.015	-0.36652
1.02	0.261783
1.025	0.595682
1.03	0.426937
1.035	0.599272
1.04	-0.15828
1.045	-0.18341
1.05	0.236651
1.055	0.319228
1.06	-0.09725
1.065	0.150484
1.07	0.268964
1.075	-0.06493
1.08	0.175616
1.085	0.365902
1.09	-0.11879
1.095	0.014052
1.1	-0.12238
1.105	0.286915
1.11	-0.38447
1.115	0.189977
1.12	-0.02185
1.125	-0.50654
1.13	0.204339
1.135	0.373083
1.14	-0.23368
1.145	0.258193
1.15	0.039185
1.155	-0.45269
1.16	-0.34857
1.165	-0.40601
1.17	-0.16905
1.175	-0.47782
1.18	-0.13674
1.185	0.45925
1.19	0.376673
1.195	0.071497
1.2	-0.23368
1.205	0.527466
1.21	-0.39524
1.215	0.154074
1.22	0.125352
1.225	-0.05775
1.23	0.251012
1.235	-0.05416
1.24	0.279735
1.245	0.021233
1.25	0.448479
1.255	0.394625
1.26	0.703391
1.265	0.383854
1.27	0.297686
1.275	0.685439
1.28	0.006872
1.285	0.046365
1.29	-0.11879
1.295	-0.30548
1.3	-0.1511
1.305	-0.16905
1.31	-0.39883
1.315	-0.18341
1.32	0.182797
1.325	-0.15828
1.33	-1.28923
1.335	-0.52449
1.34	-0.24804
1.345	0.182797
1.35	-0.38088
1.355	-0.39883
1.36	0.157665
1.365	0.057136
1.37	-0.12238
1.375	-1.00918
1.38	-0.24445
1.385	-0.09366
1.39	0.028414
1.395	0.279735
1.4	0.254603
1.405	0.22229
1.41	-0.25522
1.415	0.251012
1.42	-0.01108
1.425	-0.1152
1.43	-0.33062
1.435	0.096629
1.44	0.114581
1.445	0.028414
1.45	-0.28394
1.455	-0.67529
1.46	-0.46705
1.465	-0.13315
1.47	0.093039
1.475	-0.99841
1.48	0.010462
1.485	0.143303
1.49	0.592091
1.495	0.10381
1.5	0.154074
1.505	-0.11879
1.51	0.527466
1.515	0.832642
1.52	0.143303
1.525	0.477202
1.53	0.146894
1.535	0.635175
1.54	0.599272
1.545	-0.0039
1.55	-0.50295
1.555	-0.26958
1.56	-0.0398
1.565	0.042775
1.57	0.868545
1.575	-0.44551
1.58	0.136123
1.585	-0.02544
1.59	0.308457
1.595	-0.08289
1.6	0.487972
1.605	-0.11161
1.61	0.893677
1.615	0.470021
1.62	0.290506
1.625	0.168435
1.63	0.189977
1.635	0.003282
1.64	-0.38806
1.645	-0.0039
1.65	0.297686
1.655	-0.19059
1.66	-0.68247
1.665	0.268964
1.67	-0.54603
1.675	0.211519
1.68	0.039185
1.685	-0.04698
1.69	-0.66092
1.695	0.240242
1.7	0.416166
1.705	-0.33062
1.71	0.229471
1.715	-0.18341
1.72	-0.05775
1.725	-0.56399
1.73	-0.35575
1.735	-0.28753
1.74	-0.51731
1.745	-0.71119
1.75	-0.20496
1.755	-0.42396
1.76	-0.36652
1.765	-1.01636
1.77	-0.57476
1.775	-0.57117
1.78	-0.02544
1.785	0.304867
1.79	-0.27676
1.795	0.035594
1.8	0.182797
1.805	0.154074
1.81	-0.12597
1.815	0.34077
1.82	-0.33421
1.825	-0.72914
1.83	-0.27676
1.835	-0.14751
1.84	-0.40242
1.845	0.297686
1.85	-0.187
1.855	0.093039
1.86	0.473611
1.865	0.046365
1.87	-0.15469
1.875	-0.31985
1.88	-0.51013
1.885	-0.52808
1.89	-0.25163
1.895	0.592091
1.9	-0.12956
1.905	-0.485
1.91	-0.66451
1.915	-0.16905
1.92	0.58132
1.925	-0.01826
1.93	-0.38806
1.935	0.706981
1.94	0.243832
1.945	-0.35216
1.95	-0.25881
1.955	-0.78659
1.96	-0.46705
1.965	-0.30189
1.97	0.207929
1.975	-0.57476
1.98	-0.95892
1.985	-0.485
1.99	0.082268
1.995	-0.06852
2	-0.1152
2.005	-0.05775
2.01	-0.6717
2.015	-0.07571
2.02	0.498743
2.025	0.663897
2.03	0.028414
2.035	-0.17264
2.04	-1.58004
2.045	-0.45269
2.05	-0.35575
2.055	0.067907
2.06	0.10022
2.065	-0.27676
2.07	-0.19778
2.075	0.301277
2.08	0.6998
2.085	0.254603
2.09	-0.12956
2.095	0.825461
2.1	0.45566
2.105	-0.16187
2.11	0.254603
2.115	-0.08648
2.12	0.024823
2.125	-0.20855
2.13	-0.25522
2.135	-0.69683
2.14	0.513105
2.145	-0.0039
2.15	-0.19059
2.155	0.552598
2.16	0.728523
2.165	0.1074
2.17	0.322819
2.175	0.200748
2.18	-0.8907
2.185	0.430528
2.19	0.114581
2.195	0.006872
2.2	0.405396
2.205	-0.02544
2.21	-0.09366
2.215	0.10022
2.22	0.10022
2.225	-0.46705
2.23	0.681849
2.235	0.559779
2.24	0.760836
2.245	-0.02185
2.25	0.22229
2.255	0.480792
2.26	-0.56758
2.265	0.114581
2.27	-0.15469
2.275	0.369492
2.28	-0.02544
2.285	-0.1152
2.29	-0.54244
2.295	0.060726
2.3	-0.55681
2.305	0.006872
2.31	-0.05416
2.315	0.146894
2.32	-0.30907
2.325	0.394625
2.33	0.602862
2.335	-0.2265
2.34	0.706981
2.345	-0.38806
2.35	0.606452
2.355	0.294096
2.36	-0.41319
2.365	-0.33062
2.37	-0.25522
2.375	0.021233
2.38	0.405396
2.385	-0.09007
2.39	-0.42396
2.395	0.405396
2.4	0.412576
2.405	0.22229
2.41	-0.42037
2.415	-0.8907
2.42	-0.22291
2.425	0.139713
2.43	0.247422
2.435	0.046365
2.44	-0.17623
2.445	0.211519
2.45	-0.27676
2.455	-0.17264
2.46	-0.15469
2.465	-0.13315
2.47	0.735703
2.475	0.089449
2.48	0.369492
2.485	-0.2265
2.49	0.477202
2.495	0.175616
2.5	0.283325
2.505	0.128942
2.51	0.272554
2.515	0.254603
2.52	0.093039
2.525	-0.25881
2.53	0.509514
2.535	-0.3737
2.54	-0.0793
2.545	-1.12766
2.55	0.118171
2.555	0.067907
2.56	0.595682
2.565	-0.37011
2.57	0.146894
2.575	-0.00031
2.58	0.34077
2.585	-0.17982
2.59	-0.29112
2.595	0.645946
2.6	-0.28753
2.605	-0.14033
2.61	0.58132
2.615	-0.10802
2.62	-0.2624
2.625	-0.36293
2.63	-0.24445
2.635	0.125352
2.64	0.452069
2.645	0.750065
2.65	0.182797
2.655	-0.23009
2.66	-0.06852
2.665	-0.31626
2.67	-0.20496
2.675	-0.46346
2.68	-0.50654
2.685	0.394625
2.69	0.678259
2.695	0.308457
2.7	0.775197
2.705	0.742884
2.71	-0.28753
2.715	-0.34498
2.72	-0.44192
2.725	-0.28035
2.73	0.322819
2.735	-0.21932
2.74	-0.28035
2.745	0.243832
2.75	0.186387
2.755	-0.5209
2.76	-0.25881
2.765	0.193568
2.77	0.168435
2.775	-0.42037
2.78	-0.31267
2.785	0.347951
2.79	0.067907
2.795	-0.24804
2.8	-0.06134
2.805	0.049955
2.81	-0.18341
2.815	-0.23727
2.82	0.017643
2.825	0.69621
2.83	-0.0039
2.835	0.606452
2.84	0.527466
2.845	-0.26958
2.85	-0.187
2.855	-0.53885
2.86	0.243832
2.865	0.487972
2.87	-0.62861
2.875	-0.62502
2.88	0.154074
2.885	0.22588
2.89	-0.68247
2.895	0.078678
2.9	0.487972
2.905	0.742884
2.91	-0.76145
2.915	0.161255
2.92	0.509514
2.925	0.049955
2.93	0.010462
2.935	0.254603
2.94	-0.04698
2.945	0.477202
2.95	0.584911
2.955	0.042775
2.96	-0.43474
2.965	0.017643
2.97	-0.62502
2.975	-0.29471
2.98	0.466431
2.985	-0.35575
2.99	0.207929
2.995	0.279735
3	-0.20496
3.005	0.703391
3.01	-0.61425
3.015	0.118171
3.02	0.154074
3.025	0.060726
3.03	-0.65733
3.035	-0.08289
3.04	-0.16546
3.045	-0.49218
3.05	0.34436
3.055	0.132532
3.06	0.689029
3.065	-0.27317
3.07	0.689029
3.075	-0.09007
3.08	-0.12956
3.085	-0.19059
3.09	0.322819
3.095	0.412576
3.1	-0.09366
3.105	0.969073
3.11	0.376673
3.115	0.032004
3.12	-0.87275
3.125	-0.29471
3.13	-0.13674
3.135	-0.65015
3.14	-0.24086
3.145	0.085859
3.15	1.55429
3.155	0.333589
3.16	0.645946
3.165	-0.44192
3.17	0.347951
3.175	-0.94456
3.18	0.024823
3.185	-0.48859
3.19	-0.28035
3.195	0.322819
3.2	-0.34857
3.205	0.247422
3.21	0.286915
3.215	0.035594
3.22	-0.42037
3.225	0.484382
3.23	-0.0398
3.235	-0.19059
3.24	-0.62861
3.245	-0.21932
3.25	0.200748
3.255	0.164845
3.26	0.491563
3.265	0.150484
3.27	-0.77222
3.275	-0.0039
3.28	-0.14033
3.285	-0.11879
3.29	-0.28035
3.295	-0.12956
3.3	0.093039
3.305	-0.30907
3.31	-0.05057
3.315	-0.10443
3.32	-0.62143
3.325	-0.10443
3.33	0.297686
3.335	0.078678
3.34	0.351541
3.345	0.265374
3.35	0.279735
3.355	0.897267
3.36	0.136123
3.365	0.294096
3.37	-0.39524
3.375	0.22588
3.38	0.426937
3.385	0.251012
3.39	0.114581
3.395	0.240242
3.4	0.430528
3.405	0.114581
3.41	0.110991
3.415	0.189977
3.42	0.412576
3.425	-0.00749
3.43	0.308457
3.435	-0.26599
3.44	-0.02544
3.445	0.290506
3.45	0.495153
3.455	0.326409
3.46	0.746474
3.465	0.527466
3.47	-0.31626
3.475	0.10381
3.48	0.143303
3.485	0.495153
3.49	-0.40242
3.495	0.620814
3.5	-0.17982
3.505	0.333589
3.51	0.667488
3.515	0.545417
3.52	0.419757
3.525	0.064317
3.53	0.049955
3.535	0.272554
3.54	0.631585
3.545	-0.05416
3.55	0.552598
3.555	-0.41678
3.56	0.667488
3.565	0.326409
3.57	0.179206
3.575	0.746474
3.58	0.143303
3.585	-0.03262
3.59	0.437708
3.595	0.376673
3.6	-0.39883
3.605	0.484382
3.61	0.649536
3.615	-0.09007
3.62	0.653126
3.625	0.728523
3.63	0.387444
3.635	0.172026
3.64	0.563369
3.645	0.175616
3.65	0.994205
3.655	-0.15469
3.66	0.821871
3.665	-0.32344
3.67	0.179206
3.675	-0.21214
3.68	0.434118
3.685	-0.52449
3.69	0.093039
3.695	0.322819
3.7	0.724933
3.705	0.793148
3.71	0.175616
3.715	-0.31985
3.72	0.728523
3.725	-0.09366
3.73	0.412576
3.735	0.168435
3.74	-0.26599
3.745	0.480792
3.75	0.753655
3.755	0.897267
3.76	0.724933
3.765	0.304867
3.77	0.136123
3.775	0.032004
3.78	-0.01467
3.785	-0.13674
3.79	0.706981
3.795	0.279735
3.8	0.34436
3.805	0.498743
3.81	-0.01467
3.815	0.92958
3.82	0.416166
3.825	0.434118
3.83	0.900857
3.835	0.308457
3.84	0.326409
3.845	0.584911
3.85	0.322819
3.855	0.33718
3.86	0.401805
3.865	0.441299
3.87	0.057136
3.875	-0.11161
3.88	-0.2624
3.885	0.114581
3.89	0.161255
3.895	0.078678
3.9	0.405396
3.905	0.028414
3.91	0.229471
3.915	0.283325
3.92	0.703391
3.925	0.505924
3.93	0.315638
3.935	0.236651
3.94	0.096629
3.945	0.1074
3.95	0.211519
3.955	0.006872
3.96	-0.26599
3.965	0.552598
3.97	-0.58553
3.975	-0.12238
3.98	-0.55681
3.985	-0.48141
3.99	0.22229
3.995	0.304867
4	0.290506
4.005	0.355131
4.01	0.376673
4.015	-0.22291
4.02	-0.45628
4.025	-0.17264
4.03	-0.62861
4.035	0.283325
4.04	0.265374
4.045	0.014052
4.05	-0.30548
4.055	0.204339
4.06	0.495153
4.065	-0.15469
4.07	-0.03621
4.075	0.114581
4.08	-0.20855
4.085	0.401805
4.09	0.139713
4.095	0.207929
4.1	0.58132
4.105	0.498743
4.11	0.268964
4.115	0.836232
4.12	0.405396
4.125	0.387444
4.13	0.075088
4.135	-0.69683
4.14	0.566959
4.145	-0.21932
4.15	0.322819
4.155	0.487972
4.16	0.189977
4.165	0.487972
4.17	-0.79377
4.175	0.261783
4.18	0.649536
4.185	0.200748
4.19	0.110991
4.195	0.57773
4.2	0.886496
4.205	0.836232
4.21	-0.24445
4.215	0.434118
4.22	0.014052
4.225	0.154074
4.23	-0.36652
4.235	0.484382
4.24	-0.17982
4.245	-0.24445
4.25	0.096629
4.255	0.251012
4.26	0.22229
4.265	-0.16905
4.27	0.014052
4.275	-0.30907
4.28	0.236651
4.285	0.168435
4.29	-0.09725
4.295	-0.80095
4.3	0.498743
4.305	-0.12238
4.31	0.326409
4.315	0.125352
4.32	0.599272
4.325	0.261783
4.33	0.559779
4.335	-0.58912
4.34	0.412576
4.345	-0.07571
4.35	-0.15469
4.355	0.523876
4.36	0.22229
4.365	-0.08648
4.37	-0.08289
4.375	0.204339
4.38	0.721342
4.385	0.154074
4.39	-0.3378
4.395	0.516695
4.4	-0.17982
4.405	0.175616
4.41	0.57773
4.415	0.150484
4.42	0.049955
4.425	-0.46705
4.43	-0.47064
4.435	-0.21932
4.44	0.193568
4.445	0.470021
4.45	-0.02544
4.455	-0.07571
4.46	-0.05057
4.465	0.656717
4.47	-0.29112
4.475	0.096629
4.48	0.143303
4.485	-0.36293
4.49	-0.66811
4.495	-0.17982
4.5	-0.73991
4.505	-0.8189
4.51	0.150484
4.515	-0.10802
4.52	0.085859
4.525	-0.23727
4.53	-0.01108
4.535	0.060726
4.54	-0.67529
4.545	-0.11879
4.55	0.268964
4.555	0.240242
4.56	-0.04698
4.565	0.401805
4.57	0.272554
4.575	0.495153
4.58	0.613633
4.585	0.441299
4.59	0.430528
4.595	-0.14033
4.6	-0.75427
4.605	0.003282
4.61	-0.11161
4.615	0.10381
4.62	0.136123
4.625	0.017643
4.63	-0.68965
4.635	-1.50824
4.64	-0.06134
4.645	0.412576
4.65	0.132532
4.655	-0.43474
4.66	0.430528
4.665	0.128942
4.67	0.229471
4.675	0.078678
4.68	0.229471
4.685	-0.1511
4.69	-0.24804
4.695	0.118171
4.7	-0.66811
4.705	-0.14751
4.71	-0.44192
4.715	-0.54603
4.72	0.391034
4.725	0.161255
4.73	0.006872
4.735	0.197158
4.74	0.843413
4.745	-0.0039
4.75	-0.06852
4.755	-0.01467
4.76	-0.05775
4.765	0.1074
4.77	-0.06134
4.775	-0.12956
4.78	-0.21573
4.785	-0.56399
4.79	0.154074
4.795	-0.10802
4.8	0.150484
4.805	-0.38088
4.81	0.279735
4.815	-0.09366
4.82	-0.02903
4.825	-0.49577
4.83	-0.70401
4.835	0.261783
4.84	-0.21573
4.845	0.035594
4.85	0.2187
4.855	0.146894
4.86	-0.73273
4.865	0.261783
4.87	-0.12956
4.875	-0.21932
4.88	0.157665
4.885	0.452069
4.89	0.200748
4.895	-0.13674
4.9	0.121762
4.905	-0.79736
4.91	-0.28394
4.915	0.006872
4.92	0.34077
4.925	-0.30189
4.93	-0.26958
4.935	-0.03621
4.94	-0.01467
4.945	0.412576
4.95	-0.17264
4.955	0.229471
4.96	0.477202
4.965	-0.00031
4.97	0.197158
4.975	0.261783
4.98	-0.6717
4.985	0.064317
4.99	0.764426
4.995	0.329999
5	0.229471
5.005	0.22588
5.01	-0.21932
5.015	-0.49577
5.02	-0.06852
5.025	-0.16187
5.03	0.541827
5.035	0.649536
5.04	-0.42755
5.045	-0.0039
5.05	-0.11879
5.055	0.706981
5.06	-0.00031
5.065	-0.2265
5.07	-0.73632
5.075	-0.12597
5.08	-0.27317
5.085	-0.0793
5.09	0.610043
5.095	0.028414
5.1	0.017643
5.105	-0.07571
5.11	-0.18341
5.115	-0.27317
5.12	-0.20137
5.125	-0.06852
5.13	-0.12597
5.135	-0.30548
5.14	-0.53167
5.145	-0.1152
5.15	0.164845
5.155	-0.0398
5.16	-0.06134
5.165	-0.01826
5.17	-0.39524
5.175	-0.2265
5.18	-0.07211
5.185	-0.4491
5.19	-0.21214
5.195	-0.1511
5.2	-0.62143
5.205	-0.84044
5.21	0.136123
5.215	0.498743
5.22	0.667488
5.225	0.143303
5.23	0.308457
5.235	-0.46705
5.24	0.003282
5.245	0.132532
5.25	-0.29112
5.255	-0.74709
5.26	0.405396
5.265	0.085859
5.27	-0.30907
5.275	0.268964
5.28	-0.24445
5.285	0.10022
5.29	0.053546
5.295	0.240242
5.3	0.049955
5.305	0.45925
5.31	-0.10084
5.315	0.491563
5.32	0.760836
5.325	-0.17982
5.33	-0.57117
5.335	0.118171
5.34	0.254603
5.345	0.595682
5.35	0.516695
5.355	0.064317
5.36	0.653126
5.365	0.071497
5.37	0.1074
5.375	0.620814
5.38	0.067907
5.385	-0.40601
5.39	-0.16546
5.395	-0.51013
5.4	0.315638
5.405	0.319228
5.41	0.093039
5.415	-0.30907
5.42	-0.44551
5.425	-0.84044
5.43	0.082268
5.435	0.082268
5.44	-0.68606
5.445	-0.10084
5.45	0.175616
5.455	-0.06134
5.46	-0.25522
5.465	-0.1511
5.47	0.118171
5.475	-0.26958
5.48	-0.28035
5.485	0.049955
5.49	0.035594
5.495	0.746474
5.5	0.229471
5.505	0.660307
5.51	0.509514
5.515	0.58132
5.52	-0.38088
5.525	-0.84762
5.53	-0.20855
5.535	-0.02544
5.54	-0.05416
5.545	-0.17264
5.55	0.204339
5.555	0.369492
5.56	-0.1511
5.565	0.028414
5.57	-0.05775
5.575	0.118171
5.58	0.46284
5.585	-0.34857
5.59	0.254603
5.595	-0.10084
5.6	0.276145
5.605	-0.45987
5.61	-0.06493
5.615	-0.42755
5.62	-0.38447
5.625	0.032004
5.63	-0.06134
5.635	-0.67529
5.64	-0.84762
5.645	-0.21214
5.65	0.251012
5.655	-0.71119
5.66	-0.5963
5.665	-0.2624
5.67	0.304867
5.675	0.024823
5.68	-0.00031
5.685	-0.11879
5.69	0.193568
5.695	0.247422
5.7	-0.16546
5.705	0.039185
5.71	0.398215
5.715	-0.31626
5.72	-0.34139
5.725	-0.09725
5.73	-0.51372
5.735	0.387444
5.74	-0.30189
5.745	-0.07571
5.75	-0.43833
5.755	-0.19778
5.76	0.028414
5.765	-0.43833
5.77	0.168435
5.775	-0.01467
5.78	-0.16546
5.785	-0.34139
5.79	-0.35934
5.795	0.373083
5.8	-0.43474
5.805	0.096629
5.81	-0.07571
5.815	-0.28394
5.82	0.096629
5.825	-0.52808
5.83	-0.34139
5.835	0.243832
5.84	0.132532
5.845	-0.80813
5.85	-0.23368
5.855	0.085859
5.86	-0.45628
5.865	-0.3378
5.87	-0.51731
5.875	-0.11161
5.88	-0.42755
5.885	-0.75786
5.89	-0.22291
5.895	-0.09366
5.9	0.365902
5.905	-0.45269
5.91	-0.61784
5.915	-0.5209
5.92	-0.46705
5.925	-0.66451
5.93	-0.64297
5.935	0.398215
5.94	-0.22291
5.945	0.254603
5.95	0.290506
5.955	-0.02544
5.96	-0.13315
5.965	-0.13674
5.97	-0.61425
5.975	-0.37729
5.98	-0.19419
5.985	0.484382
5.99	0.333589
5.995	-0.51372
6	0.566959
6.005	-0.0039
6.01	-0.34498
6.015	-0.2624
6.02	-0.0039
6.025	-1.00559
6.03	0.132532
6.035	0.495153
6.04	0.365902
6.045	-0.05775
6.05	-0.49218
6.055	0.301277
6.06	0.229471
6.065	-0.27676
6.07	0.401805
6.075	0.57414
6.08	0.326409
6.085	0.391034
6.09	-0.0793
6.095	-0.05057
6.1	0.498743
6.105	0.22588
6.11	-0.485
6.115	-0.81172
6.12	0.118171
6.125	-0.30189
6.13	-0.47782
6.135	-0.17623
6.14	-0.39883
6.145	-0.60707
6.15	0.33718
6.155	-0.40601
6.16	-0.20855
6.165	0.229471
6.17	0.154074
6.175	-0.13315
6.18	0.082268
6.185	0.33718
6.19	0.229471
6.195	0.276145
6.2	0.430528
6.205	0.58132
6.21	0.358722
6.215	0.268964
6.22	0.642356
6.225	-0.19778
6.23	0.265374
6.235	-0.26599
6.24	0.355131
6.245	-0.64656
6.25	0.34077
6.255	0.143303
6.26	-0.06134
6.265	-0.21573
6.27	-0.42396
6.275	0.003282
6.28	0.509514
6.285	0.035594
6.29	0.437708
6.295	0.509514
6.3	0.146894
6.305	0.261783
6.31	0.498743
6.315	-0.2983
6.32	0.089449
6.325	0.082268
6.33	0.470021
6.335	-0.19059
6.34	0.157665
6.345	0.150484
6.35	-0.20137
6.355	0.024823
6.36	0.297686
6.365	0.125352
6.37	0.437708
6.375	0.599272
6.38	0.276145
6.385	0.836232
6.39	0.430528
6.395	0.172026
6.4	-0.03262
6.405	-0.11879
6.41	-0.02903
6.415	-0.20855
6.42	0.45566
6.425	0.161255
6.43	0.10022
6.435	-0.94097
6.44	-0.14751
6.445	0.566959
6.45	0.541827
6.455	0.010462
6.46	0.024823
6.465	-0.21214
6.47	-0.30189
6.475	0.017643
6.48	-0.12597
6.485	0.319228
6.49	0.437708
6.495	0.082268
6.5	0.139713
6.505	-0.21573
6.51	0.355131
6.515	0.10022
6.52	0.437708
6.525	0.014052
6.53	0.240242
6.535	-0.06852
6.54	-0.09366
6.545	-0.19059
6.55	0.369492
6.555	-0.53526
6.56	-0.61425
6.565	0.631585
6.57	0.322819
6.575	0.610043
6.58	-0.24445
6.585	0.22229
6.59	0.627994
6.595	-0.63938
6.6	-0.50654
6.605	-0.38088
6.61	-0.21932
6.615	0.480792
6.62	0.678259
6.625	0.943941
6.63	0.423347
6.635	0.082268
6.64	0.164845
6.645	0.032004
6.65	0.168435
6.655	-0.39165
6.66	-0.51013
6.665	-0.54963
6.67	-0.09366
6.675	0.355131
6.68	0.373083
6.685	0.653126
6.69	0.649536
6.695	0.22229
6.7	0.143303
6.705	0.825461
6.71	0.175616
6.715	-0.5209
6.72	-0.12597
6.725	0.121762
6.73	0.003282
6.735	0.089449
6.74	0.22229
6.745	-0.45269
6.75	0.602862
6.755	0.405396
6.76	-0.70042
6.765	-0.21932
6.77	0.58132
6.775	0.355131
6.78	0.071497
6.785	0.592091
6.79	0.049955
6.795	0.559779
6.8	-0.04339
6.805	0.294096
6.81	-0.25881
6.815	0.46284
6.82	0.064317
6.825	0.006872
6.83	-0.1152
6.835	1.03729
6.84	0.143303
6.845	-0.10802
6.85	0.150484
6.855	0.182797
6.86	-0.28035
6.865	0.886496
6.87	0.34077
6.875	-0.16905
6.88	-0.02185
6.885	-0.58553
6.89	0.520285
6.895	0.251012
6.9	0.236651
6.905	-0.187
6.91	-0.2624
6.915	0.2187
6.92	0.57414
6.925	0.477202
6.93	-0.34139
6.935	0.049955
6.94	-0.67888
6.945	0.247422
6.95	0.606452
6.955	0.017643
6.96	-0.30907
6.965	0.290506
6.97	-0.04698
6.975	0.958302
6.98	0.1074
6.985	-0.3737
6.99	-0.2624
6.995	0.193568
7	0.416166
7.005	-0.02903
7.01	0.032004
7.015	-0.25522
7.02	0.168435
7.025	-0.04698
7.03	0.024823
7.035	0.689029
7.04	0.412576
7.045	-0.2983
7.05	0.021233
7.055	-0.2624
7.06	-0.20496
7.065	0.035594
7.07	0.685439
7.075	-0.31985
7.08	-0.14033
7.085	-0.23727
7.09	0.110991
7.095	-0.06852
7.1	-0.30907
7.105	-0.20496
7.11	0.671078
7.115	0.416166
7.12	0.380263
7.125	0.283325
7.13	-0.13674
7.135	0.34077
7.14	-0.27317
7.145	-0.08289
7.15	0.380263
7.155	0.441299
7.16	0.57773
7.165	0.365902
7.17	0.34436
7.175	-0.02903
7.18	0.150484
7.185	0.247422
7.19	0.448479
7.195	-0.00749
7.2	0.45925
7.205	0.45925
7.21	-0.33062
7.215	0.491563
7.22	0.071497
7.225	0.179206
7.23	0.128942
7.235	-0.63938
7.24	-0.09366
7.245	0.441299
7.25	-0.30548
7.255	0.326409
7.26	-0.42037
7.265	-0.23727
7.27	-0.24086
7.275	-0.19059
7.28	-0.5209
7.285	-0.16905
7.29	-0.61784
7.295	-0.75427
7.3	0.189977
7.305	-0.2265
7.31	-0.39524
7.315	0.290506
7.32	0.046365
7.325	-0.05057
7.33	-0.02544
7.335	-1.40412
7.34	0.114581
7.345	-0.53167
7.35	0.042775
7.355	-0.70042
7.36	-0.58912
7.365	0.240242
7.37	0.286915
7.375	-0.49218
7.38	0.010462
7.385	-0.32703
7.39	-0.63579
7.395	0.067907
7.4	-0.54603
7.405	-0.02185
7.41	-0.11161
7.415	0.146894
7.42	-0.63579
7.425	0.039185
7.43	-0.31267
7.435	-0.02903
7.44	-0.85839
7.445	-0.27317
7.45	-0.59271
7.455	-0.30189
7.46	0.470021
7.465	0.534646
7.47	0.667488
7.475	0.383854
7.48	0.154074
7.485	-0.03262
7.49	-0.485
7.495	0.110991
7.5	-0.28394
7.505	-0.23368
7.51	-0.68247
7.515	0.268964
7.52	0.279735
7.525	-0.09007
7.53	0.006872
7.535	0.22588
7.54	-0.32344
7.545	-0.47423
7.55	0.042775
7.555	0.093039
7.56	-0.10084
7.565	-0.21932
7.57	-0.00031
7.575	-0.5209
7.58	0.204339
7.585	0.197158
7.59	0.520285
7.595	0.45566
7.6	0.46284
7.605	-0.06134
7.61	0.509514
7.615	-0.08289
7.62	-0.00749
7.625	-0.47782
7.63	-0.23727
7.635	0.272554
7.64	-0.5209
7.645	0.125352
7.65	0.380263
7.655	-0.84762
7.66	0.513105
7.665	0.233061
7.67	-0.68606
7.675	-0.14033
7.68	-0.04698
7.685	0.089449
7.69	-0.55322
7.695	-0.19059
7.7	0.681849
7.705	-0.0793
7.71	-0.04339
7.715	-0.13674
7.72	0.046365
7.725	-0.24804
7.73	0.552598
7.735	-0.24086
7.74	0.136123
7.745	0.082268
7.75	0.613633
7.755	-0.08648
7.76	0.168435
7.765	0.049955
7.77	-0.21932
7.775	-0.28035
7.78	0.089449
7.785	-0.13674
7.79	-0.14392
7.795	0.197158
7.8	0.035594
7.805	0.315638
7.81	0.283325
7.815	-0.00749
7.82	0.297686
7.825	-0.05057
7.83	-0.05416
7.835	0.085859
7.84	-0.72555
7.845	-0.37011
7.85	-0.36293
7.855	-0.36293
7.86	-0.20855
7.865	-0.48141
7.87	-0.50295
7.875	-0.04698
7.88	-0.20137
7.885	0.308457
7.89	0.92958
7.895	0.380263
7.9	-0.40242
7.905	-0.1152
7.91	0.157665
7.915	0.10381
7.92	0.207929
7.925	-0.61425
7.93	0.426937
7.935	0.315638
7.94	0.45566
7.945	-0.60348
7.95	-0.19059
7.955	-0.99123
7.96	-0.48141
7.965	0.075088
7.97	0.261783
7.975	0.064317
7.98	0.161255
7.985	-0.01467
7.99	0.365902
7.995	-0.37011
8	0.258193
8.005	-0.80095
8.01	0.200748
8.015	0.154074
8.02	0.057136
8.025	-0.31267
8.03	0.064317
8.035	0.032004
8.04	-0.34139
8.045	0.599272
8.05	-0.19419
8.055	0.139713
8.06	0.039185
8.065	-0.05775
8.07	-0.10084
8.075	-0.09007
8.08	-0.16905
8.085	-0.2624
8.09	-0.00031
8.095	-0.15828
8.1	0.175616
8.105	0.617223
8.11	0.276145
8.115	0.595682
8.12	-0.25163
8.125	-0.2265
8.13	-0.2265
8.135	-0.21214
8.14	0.276145
8.145	-0.20137
8.15	0.523876
8.155	0.128942
8.16	0.118171
8.165	0.563369
8.17	-0.20137
8.175	0.965483
8.18	-0.17982
8.185	0.006872
8.19	-0.43833
8.195	0.157665
8.2	-0.57476
8.205	-0.36652
8.21	-1.00559
8.215	-0.35934
8.22	0.078678
8.225	-0.1511
8.23	0.046365
8.235	0.319228
8.24	0.57773
8.245	0.541827
8.25	0.391034
8.255	-0.2265
8.26	0.6998
8.265	0.283325
8.27	-0.3378
8.275	0.319228
8.28	-0.16187
8.285	0.157665
8.29	0.394625
8.295	-0.33421
8.3	-0.31626
8.305	0.294096
8.31	-0.45628
8.315	-0.48141
8.32	-0.33062
8.325	-0.16187
8.33	-0.13315
8.335	-0.80813
8.34	0.22229
8.345	0.753655
8.35	0.434118
8.355	0.376673
8.36	-0.33062
8.365	-1.11689
8.37	0.735703
8.375	0.34077
8.38	-0.32344
8.385	0.215109
8.39	0.139713
8.395	0.347951
8.4	-0.61066
8.405	-0.03621
8.41	0.326409
8.415	-0.43833
8.42	-0.58912
8.425	-0.36293
8.43	0.373083
8.435	0.128942
8.44	-0.53526
8.445	0.610043
8.45	0.631585
8.455	0.660307
8.46	0.121762
8.465	-0.66811
8.47	-0.56399
8.475	-0.36293
8.48	-0.45269
8.485	0.556188
8.49	0.136123
8.495	0.265374
8.5	-0.11879
8.505	0.046365
8.51	0.042775
8.515	0.082268
8.52	0.265374
8.525	0.211519
8.53	0.347951
8.535	-0.26599
8.54	-0.13674
8.545	-0.09366
8.55	0.645946
8.555	0.204339
8.56	-0.19059
8.565	-0.34498
8.57	-0.62143
8.575	-0.10802
8.58	0.304867
8.585	0.653126
8.59	-0.72914
8.595	0.473611
8.6	1.24194
8.605	-0.39165
8.61	0.067907
8.615	-0.32344
8.62	-0.17264
8.625	0.014052
8.63	-0.9661
8.635	0.049955
8.64	-0.0793
8.645	0.006872
8.65	0.825461
8.655	0.286915
8.66	0.125352
8.665	0.437708
8.67	0.897267
8.675	0.243832
8.68	-0.03621
8.685	0.265374
8.69	0.021233
8.695	0.204339
8.7	-0.05775
8.705	0.570549
8.71	-0.13315
8.715	0.164845
8.72	-0.55681
8.725	-0.21932
8.73	0.229471
8.735	0.024823
8.74	0.154074
8.745	0.082268
8.75	0.315638
8.755	-0.34498
8.76	0.81828
8.765	0.355131
8.77	-0.43833
8.775	-0.17982
8.78	-0.71478
8.785	0.610043
8.79	-0.21573
8.795	0.387444
8.8	0.294096
8.805	0.312048
8.81	0.082268
8.815	-0.04339
8.82	-0.02544
8.825	0.143303
8.83	0.387444
8.835	-0.38088
8.84	0.082268
8.845	0.549008
8.85	0.333589
8.855	-0.5209
8.86	-0.33062
8.865	0.33718
8.87	-0.01108
8.875	0.387444
8.88	0.143303
8.885	-0.15469
8.89	0.477202
8.895	0.408986
8.9	0.391034
8.905	0.549008
8.91	-0.04339
8.915	0.782377
8.92	0.710571
8.925	0.121762
8.93	-0.35575
8.935	-0.2624
8.94	0.714162
8.945	0.527466
8.95	0.380263
8.955	-0.53885
8.96	-0.25163
8.965	0.028414
8.97	0.265374
8.975	-0.07211
8.98	-0.05057
8.985	-0.0793
8.99	0.588501
8.995	0.531056
9	-0.29112
9.005	0.024823
9.01	-0.45628
9.015	0.233061
9.02	0.606452
9.025	-0.31626
9.03	0.157665
9.035	0.290506
9.04	0.516695
9.045	0.391034
9.05	0.075088
9.055	0.283325
9.06	-0.10084
9.065	0.473611
9.07	0.150484
9.075	0.480792
9.08	0.139713
9.085	0.093039
9.09	0.121762
9.095	0.369492
9.1	-0.28753
9.105	-0.38447
9.11	0.505924
9.115	-0.56758
9.12	-0.15828
9.125	-0.04698
9.13	-0.05775
9.135	0.139713
9.14	-0.3737
9.145	0.441299
9.15	-0.17623
9.155	0.110991
9.16	0.391034
9.165	0.272554
9.17	0.254603
9.175	0.904448
9.18	0.265374
9.185	-0.25522
9.19	-0.49936
9.195	0.175616
9.2	-0.19059
9.205	0.832642
9.21	0.556188
9.215	0.394625
9.22	0.373083
9.225	-0.35216
9.23	-0.45628
9.235	-0.31985
9.24	0.154074
9.245	-0.13315
9.25	0.261783
9.255	-0.33062
9.26	0.243832
9.265	-0.34139
9.27	0.082268
9.275	-0.0793
9.28	0.452069
9.285	0.276145
9.29	0.617223
9.295	0.128942
9.3	0.408986
9.305	-0.65374
9.31	-0.68965
9.315	-0.12597
9.32	-0.20496
9.325	0.139713
9.33	-0.79736
9.335	-0.08289
9.34	0.322819
9.345	0.240242
9.35	-0.38088
9.355	-0.05057
9.36	-1.18152
9.365	-0.88711
9.37	0.251012
9.375	0.150484
9.38	0.911628
9.385	-0.23009
9.39	-0.31626
9.395	-0.39883
9.4	-0.68606
9.405	-0.30907
9.41	-0.29112
9.415	-0.97328
9.42	-0.31267
9.425	-0.16546
9.43	0.243832
9.435	-0.24445
9.44	0.22588
9.445	0.021233
9.45	-0.19419
9.455	-0.30907
9.46	0.592091
9.465	0.721342
9.47	0.297686
9.475	0.832642
9.48	0.006872
9.485	0.452069
9.49	0.452069
9.495	0.69621
9.5	0.197158
9.505	0.035594
9.51	0.128942
9.515	0.434118
9.52	0.154074
9.525	0.093039
9.53	0.22588
9.535	0.089449
9.54	1.2563
9.545	0.297686
9.55	0.69262
9.555	0.175616
9.56	-0.41678
9.565	-0.09007
9.57	-0.13315
9.575	0.060726
9.58	-0.06852
9.585	0.312048
9.59	-0.49936
9.595	-0.50295
9.6	-0.14751
9.605	0.075088
9.61	0.10381
9.615	0.006872
9.62	-0.46346
9.625	0.172026
9.63	-0.07571
9.635	0.329999
9.64	-0.485
9.645	0.272554
9.65	-0.20137
9.655	-0.30907
9.66	0.34436
9.665	0.46284
9.67	0.189977
9.675	-0.26958
9.68	-0.11879
9.685	-0.33062
9.69	-0.13674
9.695	-0.17623
9.7	-0.62502
9.705	-0.17982
9.71	0.549008
9.715	-0.34498
9.72	0.078678
9.725	-0.10802
9.73	0.398215
9.735	-0.7435
9.74	0.021233
9.745	-0.00031
9.75	-0.03621
9.755	-0.12597
9.76	-0.16546
9.765	-0.49936
9.77	0.689029
9.775	0.426937
9.78	0.193568
9.785	-0.04698
9.79	-0.09007
9.795	-0.80813
9.8	-0.10084
9.805	-0.10443
9.81	-0.53167
9.815	0.168435
9.82	-0.27676
9.825	-0.44192
9.83	0.139713
9.835	0.261783
9.84	0.674668
9.845	0.096629
9.85	-0.33421
9.855	0.021233
9.86	0.297686
9.865	-0.33421
9.87	-0.06134
9.875	0.240242
9.88	0.369492
9.885	0.570549
9.89	0.168435
9.895	-0.10802
9.9	0.114581
9.905	0.771606
9.91	0.017643
9.915	-0.00031
9.92	-0.51013
9.925	0.595682
9.93	-0.48859
9.935	-0.13674
9.94	-0.28753
9.945	-0.23009
9.95	-0.187
9.955	-0.41678
9.96	-0.24445
9.965	-0.07211
9.97	0.085859
9.975	0.132532
9.98	-0.66811
9.985	-0.12956
[truncated: 60,003 more rows]

## Sheet: Fig.8 - figure supplement 1b
Trace 5 µM sc-APP17 / 5 µM GABA / 5µM sc-APP17 + 5 µM GABA							Column graph
Time (min)							5 µM sc-APP17	5 µM GABA	5 µM sc-APP17 + 5 µM GABA
0	-0.32087						-0.31985	8.61846	7.6401
0.005	0.153051						0.482428	6.01515	5.76769
0.01	0.530033						0.590055	84.0346	56.5713
0.015	0.379241						1.41331	57.8815	43.5663
0.02	-0.04801						1.80086	51.7945	40.6587
0.025	0.795716						0.143931	6.82342	3.77686
0.03	0.034571						-0.11287	66.5682	64.7141
0.035	0.655694
0.04	0.896244
0.045	-0.17726
0.05	0.246399
0.055	-0.37113
0.06	-0.38549
0.065	-0.00492
0.07	1.07935
0.075	-0.17008
0.08	0.188955
0.085	-0.07314
0.09	0.235628
0.095	0.13151
0.1	0.066884
0.105	-0.50756
0.11	0.436685
0.115	0.540804
0.12	0.034571
0.125	-0.06237
0.13	0.023801
0.135	0.149461
0.14	-0.31728
0.145	0.752632
0.15	0.817258
0.155	0.565936
0.16	0.458227
0.165	0.1351
0.17	0.285893
0.175	0.13151
0.18	-0.14853
0.185	0.192545
0.19	0.113558
0.195	0.655694
0.2	0.282302
0.205	-0.28138
0.21	0.25358
0.215	0.099197
0.22	-0.644
0.225	0.242809
0.23	-0.08391
0.235	0.077655
0.24	0.156642
0.245	-0.33523
0.25	-0.01928
0.255	-0.35677
0.26	0.698778
0.265	0.702368
0.27	-0.3101
0.275	0.562346
0.28	-0.29574
0.285	0.109968
0.29	-0.30651
0.295	0.623381
0.3	0.174593
0.305	-0.10545
0.31	-0.30292
0.315	-0.17008
0.32	-0.25265
0.325	-0.26701
0.33	0.074065
0.335	-0.47166
0.34	-0.0516
0.345	0.188955
0.35	0.01303
0.355	0.188955
0.36	0.070475
0.365	0.393602
0.37	0.720319
0.375	-0.00133
0.38	0.422324
0.385	0.759813
0.39	0.030981
0.395	-0.3101
0.4	0.009439
0.405	-0.13058
0.41	-0.0121
0.415	0.034571
0.42	-0.61168
0.425	-0.36036
0.43	-0.08032
0.435	-0.28856
0.44	-0.72298
0.445	-0.42499
0.45	0.698778
0.455	-0.33164
0.46	-0.08391
0.465	0.397192
0.47	-0.1988
0.475	0.443866
0.48	0.01303
0.485	0.386421
0.49	0.174593
0.495	-0.03005
0.5	-0.55783
0.505	0.24999
0.51	-0.34959
0.515	-0.53988
0.52	-0.24188
0.525	-0.3101
0.53	0.311025
0.535	0.038162
0.54	-0.44294
0.545	-0.17367
0.55	-0.00851
0.555	-0.64759
0.56	-0.13058
0.565	-0.29215
0.57	-0.41781
0.575	0.325386
0.58	-0.46448
0.585	0.196135
0.59	-0.57219
0.595	-0.82351
0.6	-0.30651
0.605	-0.03723
0.61	0.433095
0.615	-0.32087
0.62	-0.07314
0.625	0.048933
0.63	0.591068
0.635	0.052523
0.64	0.038162
0.645	0.501311
0.65	-0.22752
0.655	-0.83787
0.66	-0.38908
0.665	-0.7158
0.67	0.084836
0.675	-0.81274
0.68	-1.05688
0.685	-0.06596
0.69	-0.55065
0.695	-0.11263
0.7	0.081245
0.705	0.163822
0.71	0.052523
0.715	-0.22034
0.72	-0.31369
0.725	-0.2706
0.73	0.185364
0.735	-0.31728
0.74	0.185364
0.745	-0.24188
0.75	-0.6045
0.755	0.282302
0.76	-0.60091
0.765	-0.07673
0.77	-0.27419
0.775	0.009439
0.78	-0.58296
0.785	-0.0875
0.79	-1.06406
0.795	0.160232
0.8	-0.32087
0.805	-0.56501
0.81	0.275122
0.815	-0.19162
0.82	-0.09827
0.825	-0.0121
0.83	-0.94558
0.835	-0.64041
0.84	0.451047
0.845	0.339747
0.85	0.820848
0.855	-0.35318
0.86	0.766993
0.865	0.666465
0.87	-0.09468
0.875	0.174593
0.88	0.25358
0.885	0.321796
0.89	-0.20598
0.895	-0.24188
0.9	-0.61168
0.905	-1.06406
0.91	-0.11263
0.915	0.02021
0.92	0.063294
0.925	-0.16649
0.93	0.178184
0.935	0.720319
0.94	0.084836
0.945	0.063294
0.95	-0.13058
0.955	0.332567
0.96	-0.42499
0.965	0.181774
0.97	-0.24906
0.975	-0.27778
0.98	0.501311
0.985	0.185364
0.99	0.267941
0.995	-0.3819
1	0.038162
1.005	0.422324
1.01	-0.43935
1.015	-0.55424
1.02	-0.03723
1.025	-0.64759
1.03	-0.57219
1.035	0.074065
1.04	-0.863
1.045	0.185364
1.05	-0.28138
1.055	0.203316
1.06	0.127919
1.065	0.763403
1.07	0.458227
1.075	-0.04442
1.08	-0.19162
1.085	-0.33882
1.09	-0.1629
1.095	0.874702
1.1	0.580298
1.105	-0.15212
1.11	0.60902
1.115	0.041752
1.12	0.181774
1.125	2.68781
1.13	0.196135
1.135	-0.43935
1.14	-0.45012
1.145	-0.33523
1.15	0.214087
1.155	-0.35677
1.16	0.102787
1.165	0.260761
1.17	0.37206
1.175	0.081245
1.18	-0.14494
1.185	-0.11263
1.19	-0.1629
1.195	-0.17726
1.2	-0.41422
1.205	-0.44653
1.21	-0.22034
1.215	-0.09827
1.22	0.178184
1.225	-0.1629
1.23	0.188955
1.235	0.228448
1.24	-0.22752
1.245	-0.25624
1.25	0.242809
1.255	-0.64759
1.26	-0.83069
1.265	-0.45371
1.27	0.056113
1.275	-0.18803
1.28	0.163822
1.285	0.547985
1.29	-0.00492
1.295	-0.69067
1.3	-0.94199
1.305	-0.11981
1.31	-0.83787
1.315	-0.29215
1.32	0.030981
1.325	-0.17726
1.33	-0.36395
1.335	0.142281
1.34	-0.346
1.345	0.059704
1.35	-0.32087
1.355	0.25358
1.36	-0.11622
1.365	-0.52911
1.37	-0.44294
1.375	-0.2347
1.38	-0.12699
1.385	-1.45181
1.39	-0.19162
1.395	0.37206
1.4	-0.9384
1.405	-0.0516
1.41	0.030981
1.415	-0.58296
1.42	-1.76058
1.425	-0.59373
1.43	1.31272
1.435	0.206906
1.44	0.023801
1.445	0.041752
1.45	-0.19162
1.455	0.415144
1.46	-0.4932
1.465	0.472588
1.47	-0.10186
1.475	0.451047
1.48	-0.61886
1.485	0.045342
1.49	-0.61168
1.495	-0.16649
1.5	0.461818
1.505	0.648513
1.51	-0.28497
1.515	0.354108
1.52	-0.43576
1.525	-0.2706
1.53	-0.81992
1.535	-0.6045
1.54	-0.11622
1.545	2.27851
1.55	-0.03364
1.555	-0.21316
1.56	0.397192
1.565	0.601839
1.57	0.443866
1.575	-0.32805
1.58	0.630562
1.585	0.407963
1.59	0.881883
1.595	0.806487
1.6	0.734681
1.605	0.871112
1.61	0.673645
1.615	-0.99585
1.62	0.124329
1.625	-0.94558
1.63	-0.29215
1.635	0.239219
1.64	-0.50756
1.645	-0.28856
1.65	-0.65836
1.655	-0.29933
1.66	-0.79479
1.665	0.461818
1.67	-0.17008
1.675	0.311025
1.68	0.181774
1.685	-0.25265
1.69	0.221267
1.695	-0.44294
1.7	-0.92045
1.705	0.443866
1.71	-0.00492
1.715	0.221267
1.72	0.246399
1.725	-0.68349
1.73	-0.00492
1.735	-0.24188
1.74	-0.1234
1.745	0.325386
1.75	-0.55065
1.755	0.407963
1.76	-0.39267
1.765	-0.05519
1.77	-0.346
1.775	-0.18444
1.78	0.698778
1.785	0.242809
1.79	-0.55424
1.795	-0.20598
1.8	-0.65477
1.805	0.056113
1.81	0.275122
1.815	0.221267
1.82	1.01113
1.825	-0.54347
1.83	0.300254
1.835	-0.23829
1.84	0.587478
1.845	0.196135
1.85	0.630562
1.855	0.483359
1.86	0.106378
1.865	-0.13776
1.87	0.914196
1.875	0.533624
1.88	0.350518
1.885	0.074065
1.89	0.325386
1.895	-0.78402
1.9	-0.45371
1.905	0.522853
1.91	0.120739
1.915	0.652104
1.92	0.314615
1.925	0.921376
1.93	0.415144
1.935	-0.70144
1.94	-0.24906
1.945	0.296664
1.95	0.156642
1.955	0.397192
1.96	-0.50038
1.965	0.117148
1.97	0.163822
1.975	-0.64759
1.98	0.221267
1.985	0.009439
1.99	-0.71221
1.995	0.522853
2	0.124329
2.005	0.587478
2.01	-0.01569
2.015	-0.5686
2.02	-0.62963
2.025	-1.21485
2.03	0.562346
2.035	0.163822
2.04	0.156642
2.045	0.041752
2.05	-0.25265
2.055	-0.02646
2.06	0.332567
2.065	0.267941
2.07	-0.51834
2.075	0.163822
2.08	0.106378
2.085	0.095607
2.09	0.063294
2.095	-0.44294
2.1	0.01662
2.105	-0.31369
2.11	0.766993
2.115	0.038162
2.12	0.246399
2.125	-0.37113
2.13	0.124329
2.135	-0.71221
2.14	-0.10186
2.145	-0.33164
2.15	0.411553
2.155	-0.04082
2.16	-0.24547
2.165	0.199725
2.17	-0.81274
2.175	0.447456
2.18	-0.09827
2.185	0.109968
2.19	0.030981
2.195	-0.51115
2.2	0.224858
2.205	0.73109
2.21	-0.26342
2.215	0.770584
2.22	0.127919
2.225	0.174593
2.23	-0.48602
2.235	0.181774
2.24	-0.80915
2.245	0.002259
2.25	-0.78043
2.255	-0.58296
2.26	-0.3101
2.265	0.178184
2.27	0.242809
2.275	0.49413
2.28	0.181774
2.285	-0.22393
2.29	0.361289
2.295	0.601839
2.3	0.178184
2.305	0.260761
2.31	-0.01569
2.315	0.971641
2.32	0.795716
2.325	0.587478
2.33	1.04704
2.335	0.777764
2.34	0.109968
2.345	-0.59732
2.35	-0.3101
2.355	0.084836
2.36	0.059704
2.365	0.591068
2.37	-0.1593
2.375	-0.10904
2.38	0.142281
2.385	0.36847
2.39	0.616201
2.395	0.318205
2.4	0.713139
2.405	-0.85941
2.41	0.537214
2.415	0.932147
2.42	0.300254
2.425	0.415144
2.43	0.127919
2.435	-0.28856
2.44	0.124329
2.445	0.382831
2.45	0.002259
2.455	0.041752
2.46	0.282302
2.465	0.451047
2.47	0.910605
2.475	0.214087
2.48	-0.11981
2.485	0.903425
2.49	-0.70862
2.495	-0.07314
2.5	-0.42499
2.505	-0.01928
2.51	-0.10545
2.515	0.081245
2.52	0.587478
2.525	0.766993
2.53	0.217677
2.535	0.476179
2.54	0.278712
2.545	0.041752
2.55	-0.35318
2.555	0.343338
2.56	-0.11263
2.565	0.644923
2.57	1.5784
2.575	-0.25983
2.58	0.059704
2.585	-0.24906
2.59	-0.71221
2.595	-0.30651
2.6	-0.25624
2.605	0.160232
2.61	0.13869
2.615	0.156642
2.62	-0.24188
2.625	-0.32446
2.63	-0.25265
2.635	0.185364
2.64	0.820848
2.645	-0.32805
2.65	0.37206
2.655	0.045342
2.66	0.181774
2.665	-0.04801
2.67	-0.51834
2.675	-0.39986
2.68	-0.4932
2.685	0.185364
2.69	0.106378
2.695	-0.03005
2.7	1.13679
2.705	1.46351
2.71	-0.48961
2.715	-0.22034
2.72	-0.16649
2.725	-0.03723
2.73	0.203316
2.735	-0.0121
2.74	0.199725
2.745	0.142281
2.75	-0.06955
2.755	0.677236
2.76	0.508492
2.765	0.030981
2.77	0.178184
2.775	0.346928
2.78	0.709549
2.785	-0.5327
2.79	-0.46089
2.795	0.766993
2.8	-0.85223
2.805	-0.54706
2.81	0.440276
2.815	-0.75529
2.82	-0.62604
2.825	0.400782
2.83	-0.01569
2.835	0.264351
2.84	0.361289
2.845	0.397192
2.85	-0.11622
2.855	0.443866
2.86	0.788535
2.865	0.587478
2.87	0.393602
2.875	0.192545
2.88	0.530033
2.885	0.002259
2.89	-0.31369
2.895	0.476179
2.9	0.203316
2.905	-0.1988
2.91	-0.24906
2.915	0.196135
2.92	0.077655
2.925	-0.62245
2.93	0.260761
2.935	-0.20239
2.94	0.178184
2.945	0.027391
2.95	0.13869
2.955	-0.10186
2.96	-0.10904
2.965	-0.1234
2.97	0.038162
2.975	-0.71939
2.98	-0.0121
2.985	0.059704
2.99	-0.17367
2.995	0.174593
3	-0.1593
3.005	-0.66195
3.01	0.379241
3.015	0.145871
3.02	-0.2347
3.025	0.346928
3.03	-0.66913
3.035	-0.1629
3.04	-0.42858
3.045	-0.03364
3.05	0.214087
3.055	-0.08032
3.06	-0.37831
3.065	0.461818
3.07	-0.47166
3.075	-0.11263
3.08	-0.12699
3.085	0.023801
3.09	0.153051
3.095	0.210496
3.1	0.364879
3.105	0.637742
3.11	0.354108
3.115	-0.16649
3.12	0.476179
3.125	-0.04082
3.13	0.756222
3.135	-0.49679
3.14	0.002259
3.145	1.05781
3.15	0.321796
3.155	0.332567
3.16	-0.24547
3.165	0.070475
3.17	-0.20957
3.175	-0.9384
3.18	0.145871
3.185	-0.38549
3.19	-0.15571
3.195	-0.61168
3.2	-0.70862
3.205	0.37206
3.21	-1.0497
3.215	-0.22034
3.22	0.37565
3.225	-0.70862
3.23	-0.11263
3.235	-0.0121
3.24	0.199725
3.245	0.61261
3.25	-0.40345
3.255	-0.08391
3.26	0.092016
3.265	-1.02816
3.27	-0.98148
3.275	-0.09468
3.28	-0.18803
3.285	-0.83428
3.29	-0.00133
3.295	0.537214
3.3	-0.56501
3.305	-0.1234
3.31	-0.05519
3.315	-0.94917
3.32	-0.45012
3.325	-0.31728
3.33	0.228448
3.335	0.167413
3.34	-0.11981
3.345	0.766993
3.35	-0.14494
3.355	-0.17367
3.36	0.350518
3.365	0.928557
3.37	0.397192
3.375	-0.05878
3.38	-0.7517
3.385	-1.15023
3.39	-0.39267
3.395	-0.54706
3.4	-0.1988
3.405	0.01303
3.41	-0.04442
3.415	-0.03005
3.42	0.924967
3.425	0.142281
3.43	-0.23111
3.435	-0.1988
3.44	0.641333
3.445	0.634152
3.45	0.357699
3.455	-0.44653
3.46	-0.16649
3.465	0.030981
3.47	0.030981
3.475	0.242809
3.48	-0.81274
3.485	-0.22393
3.49	0.109968
3.495	0.741861
3.5	-0.10545
3.505	-0.76966
3.51	0.120739
3.515	-0.25265
3.52	0.501311
3.525	0.25358
3.53	0.005849
3.535	-0.39267
3.54	0.181774
3.545	-1.03175
3.55	0.210496
3.555	0.192545
3.56	0.48695
3.565	-1.14305
3.57	-0.74811
3.575	0.504901
3.58	0.160232
3.585	-0.9384
3.59	0.117148
3.595	-1.42309
3.6	0.551575
3.605	-0.9384
3.61	0.232038
3.615	0.580298
3.62	-0.20598
3.625	0.458227
3.63	0.282302
3.635	0.587478
3.64	0.713139
3.645	0.264351
3.65	0.346928
3.655	0.174593
3.66	-0.09827
3.665	0.124329
3.67	0.321796
3.675	-0.0121
3.68	-0.20598
3.685	-0.20957
3.69	-0.19521
3.695	-0.26701
3.7	1.23014
3.705	0.002259
3.71	0.774174
3.715	0.512082
3.72	0.745452
3.725	-0.71939
3.73	-0.9384
3.735	-1.19331
3.74	-1.02098
3.745	-0.24906
3.75	0.573117
3.755	0.221267
3.76	0.792125
3.765	-0.13417
3.77	-0.18444
3.775	0.059704
3.78	0.659284
3.785	0.25358
3.79	0.644923
3.795	-0.08391
3.8	0.235628
3.805	0.555165
3.81	0.038162
3.815	0.066884
3.82	-0.07673
3.825	0.145871
3.83	0.077655
3.835	0.350518
3.84	0.088426
3.845	0.088426
3.85	0.066884
3.855	-0.0516
3.86	-0.48961
3.865	-0.30292
3.87	-0.2706
3.875	-0.35677
3.88	-0.84864
3.885	0.328976
3.89	0.332567
3.895	-0.32446
3.9	-0.73734
3.905	-0.51115
3.91	-0.53629
3.915	0.519262
3.92	0.185364
3.925	0.659284
3.93	0.117148
3.935	-0.73016
3.94	-0.1629
3.945	0.878293
3.95	-0.26701
3.955	-0.08032
3.96	-1.19331
3.965	-0.50756
3.97	-0.48602
3.975	0.02021
3.98	-0.60809
3.985	-0.33523
3.99	-0.10904
3.995	0.379241
4	-0.23829
4.005	0.562346
4.01	0.84239
4.015	0.587478
4.02	-0.41063
4.025	0.142281
4.03	-0.04442
4.035	0.235628
4.04	0.192545
4.045	0.059704
4.05	0.698778
4.055	0.095607
4.06	0.088426
4.065	0.023801
4.07	-0.03364
4.075	0.285893
4.08	0.160232
4.085	0.188955
4.09	0.630562
4.095	0.914196
4.1	0.336157
4.105	0.720319
4.11	0.325386
4.115	0.436685
4.12	0.860341
4.125	0.311025
4.13	0.425915
4.135	-0.05519
4.14	0.526443
4.145	0.594659
4.15	0.472588
4.155	0.271531
4.16	0.070475
4.165	-0.65118
4.17	-0.20957
4.175	0.242809
4.18	0.052523
4.185	0.102787
4.19	-0.41063
4.195	-0.76607
4.2	-0.20957
4.205	0.451047
4.21	0.766993
4.215	-0.19162
4.22	-0.64759
4.225	0.185364
4.23	0.7275
4.235	-0.5327
4.24	0.282302
4.245	-0.35318
4.25	0.881883
4.255	0.106378
4.26	-0.70144
4.265	0.738271
4.27	-0.18444
4.275	-0.5686
4.28	0.300254
4.285	-0.13776
4.29	-0.36395
4.295	0.576707
4.3	0.522853
4.305	0.684416
4.31	0.048933
4.315	0.203316
4.32	-0.38549
4.325	0.102787
4.33	-0.04801
4.335	-0.51834
4.34	0.573117
4.345	0.267941
4.35	-0.14494
4.355	0.24999
4.36	0.61261
4.365	-0.04801
4.37	-0.11263
4.375	0.580298
4.38	0.325386
4.385	0.425915
4.39	0.454637
4.395	-0.00492
4.4	0.081245
4.405	-0.13417
4.41	0.393602
4.415	0.059704
4.42	-0.11622
4.425	0.246399
4.43	0.350518
4.435	-0.32087
4.44	0.483359
4.445	0.311025
4.45	-0.27419
4.455	0.25358
4.46	0.472588
4.465	0.37206
4.47	0.056113
4.475	-0.1593
4.48	0.501311
4.485	0.519262
4.49	0.092016
4.495	-0.29933
4.5	-0.34959
4.505	0.24999
4.51	0.264351
4.515	-0.10545
4.52	-0.02646
4.525	0.156642
4.53	-0.1593
4.535	0.307435
4.54	-0.53629
4.545	0.379241
4.55	-0.70144
4.555	-0.17008
4.56	0.530033
4.565	0.37206
4.57	-0.03364
4.575	-0.59014
4.58	-0.61168
4.585	0.788535
4.59	-0.00492
4.595	1.01832
4.6	-0.07314
4.605	-0.09827
4.61	0.569527
4.615	-0.07314
4.62	0.084836
4.625	-0.50756
4.63	0.60543
4.635	0.228448
4.64	-0.11981
4.645	0.583888
4.65	0.099197
4.655	0.526443
4.66	-0.11981
4.665	-0.24906
4.67	0.167413
4.675	-0.43217
4.68	0.153051
4.685	0.052523
4.69	0.885473
4.695	0.418734
4.7	-0.12699
4.705	0.25717
4.71	0.145871
4.715	-0.11981
4.72	-0.66554
4.725	0.102787
4.73	0.501311
4.735	0.009439
4.74	-0.26342
4.745	0.950099
4.75	-0.26701
4.755	0.390012
4.76	-0.13776
4.765	0.242809
4.77	0.670055
4.775	0.573117
4.78	-0.37472
4.785	-0.37113
4.79	-0.29574
4.795	-0.20598
4.8	0.476179
4.805	-0.24547
4.81	0.267941
4.815	0.002259
4.82	-0.7912
4.825	-0.70144
4.83	-0.35318
4.835	-0.30651
4.84	-0.32087
4.845	-0.42499
4.85	0.13869
4.855	-0.64759
4.86	-0.35318
4.865	-0.03005
4.87	-0.24906
4.875	-0.79479
4.88	-0.0875
4.885	-0.73734
4.89	-0.69067
4.895	-0.16649
4.9	0.232038
4.905	-0.23829
4.91	0.005849
4.915	-0.61527
4.92	0.199725
4.925	-0.50397
4.93	-0.07314
4.935	-0.31728
4.94	-0.08032
4.945	0.361289
4.95	-0.64041
4.955	-0.87018
4.96	-0.02287
4.965	-0.04801
4.97	0.228448
4.975	-0.31369
4.98	0.005849
4.985	-0.07314
4.99	0.210496
4.995	0.580298
5	0.418734
5.005	-0.07673
5.01	-0.59014
5.015	-0.48602
5.02	0.386421
5.025	-0.14494
5.03	-0.67631
5.035	-1.13946
5.04	-0.20239
5.045	0.37565
5.05	-0.14494
5.055	-0.37472
5.06	0.106378
5.065	0.303844
5.07	-0.2706
5.075	-0.70503
5.08	0.045342
5.085	0.328976
5.09	-0.17367
5.095	0.232038
5.1	-0.29933
5.105	0.307435
5.11	0.346928
5.115	-0.52911
5.12	0.533624
5.125	0.709549
5.13	0.066884
5.135	-0.33882
5.14	-0.13058
5.145	-0.08391
5.15	0.206906
5.155	0.451047
5.16	0.099197
5.165	0.271531
5.17	-0.99225
5.175	-0.03005
5.18	-0.1593
5.185	0.127919
5.19	0.61261
5.195	-0.14494
5.2	-0.67631
5.205	0.260761
5.21	-0.59373
5.215	-0.4573
5.22	-0.08391
5.225	-0.81992
5.23	-0.64041
5.235	-0.0875
5.24	0.339747
5.245	0.688007
5.25	-0.23829
5.255	-0.02287
5.26	-0.83428
5.265	0.400782
5.27	0.583888
5.275	0.203316
5.28	-0.37472
5.285	-0.20239
5.29	-0.02287
5.295	0.1351
5.3	0.307435
5.305	-0.20598
5.31	-0.03364
5.315	0.400782
5.32	0.594659
5.325	0.537214
5.33	0.203316
5.335	-0.29215
5.34	-0.04082
5.345	0.24999
5.35	-0.17367
5.355	0.350518
5.36	0.038162
5.365	1.2086
5.37	1.20142
5.375	0.986002
5.38	0.73109
5.385	-0.4573
5.39	-0.43217
5.395	0.465408
5.4	0.598249
5.405	-0.04082
5.41	-0.11263
5.415	-0.01569
5.42	-0.37113
5.425	0.386421
5.43	0.24999
5.435	-0.0875
5.44	-0.28138
5.445	0.451047
5.45	0.160232
5.455	0.113558
5.46	-0.01928
5.465	0.415144
5.47	0.688007
5.475	-0.39986
5.48	-0.28497
5.485	0.583888
5.49	0.027391
5.495	-1.18972
5.5	-0.09468
5.505	0.185364
5.51	-0.28138
5.515	0.163822
5.52	0.544395
5.525	0.214087
5.53	-0.17726
5.535	-0.03364
5.54	-0.44294
5.545	0.37206
5.55	-0.61886
5.555	0.476179
5.56	0.25717
5.565	-0.83428
5.57	-0.43935
5.575	-0.39267
5.58	-0.13776
5.585	0.120739
5.59	0.907015
5.595	-0.20598
5.6	-0.72657
5.605	-0.82351
5.61	-0.37472
5.615	-0.13058
5.62	-0.14494
5.625	0.109968
5.63	-0.64759
5.635	0.196135
5.64	0.02021
5.645	-0.55424
5.65	0.350518
5.655	0.102787
5.66	0.034571
5.665	0.293073
5.67	-0.22752
5.675	-0.46807
5.68	0.153051
5.685	-0.50038
5.69	0.163822
5.695	-0.21675
5.7	-0.07673
5.705	0.311025
5.71	0.142281
5.715	-0.0516
5.72	-0.33164
5.725	0.303844
5.73	1.2445
5.735	0.271531
5.74	-0.39626
5.745	-0.74452
5.75	-0.12699
5.755	0.056113
5.76	-0.03723
5.765	0.328976
5.77	0.49413
5.775	0.942918
5.78	0.766993
5.785	0.1351
5.79	-0.04801
5.795	-0.0516
5.8	0.300254
5.805	-0.59014
5.81	-0.01928
5.815	-0.4214
5.82	-0.05519
5.825	0.092016
5.83	0.117148
5.835	0.813667
5.84	-0.04082
5.845	-0.25983
5.85	-0.10545
5.855	-0.03364
5.86	-0.27778
5.865	0.677236
5.87	0.01662
5.875	0.328976
5.88	0.095607
5.885	-0.18444
5.89	0.325386
5.895	0.515672
5.9	0.551575
5.905	0.346928
5.91	0.759813
5.915	0.662875
5.92	0.074065
5.925	-0.28856
5.93	0.303844
5.935	0.587478
5.94	0.048933
5.945	0.260761
5.95	-0.18085
5.955	-0.15212
5.96	0.160232
5.965	0.364879
5.97	0.192545
5.975	0.698778
5.98	-0.20598
5.985	0.099197
5.99	0.84239
5.995	0.01303
6	0.792125
6.005	-0.00851
6.01	0.214087
6.015	0.156642
6.02	0.573117
6.025	0.734681
6.03	0.1351
6.035	0.540804
6.04	0.580298
6.045	-0.65118
6.05	0.264351
6.055	0.652104
6.06	-0.4932
6.065	0.109968
6.07	0.081245
6.075	-0.56142
6.08	-0.58655
6.085	0.185364
6.09	-0.25624
6.095	-0.33882
6.1	-0.53629
6.105	-0.01569
6.11	0.120739
6.115	-0.01569
6.12	0.052523
6.125	-0.22752
6.13	0.181774
6.135	0.307435
6.14	-0.23111
6.145	-0.1629
6.15	-0.43576
6.155	0.092016
6.16	-0.49679
6.165	0.124329
6.17	-0.93122
6.175	-0.41781
6.18	-0.25265
6.185	-0.32805
6.19	-0.28497
6.195	0.461818
6.2	-0.05878
6.205	0.188955
6.21	0.296664
6.215	-0.0516
6.22	0.163822
6.225	0.120739
6.23	0.088426
6.235	0.328976
6.24	0.070475
6.245	-0.29933
6.25	0.206906
6.255	0.558756
6.26	0.124329
6.265	-0.17008
6.27	0.023801
6.275	0.339747
6.28	-0.38549
6.285	-0.863
6.29	-0.1234
6.295	-0.25265
6.3	0.25717
6.305	0.221267
6.31	0.318205
6.315	-0.36036
6.32	-0.50397
6.325	-0.40704
6.33	-0.29933
6.335	0.099197
6.34	-0.52552
6.345	-0.60809
6.35	-0.80556
6.355	0.318205
6.36	-0.25265
6.365	-0.27778
6.37	-0.03005
6.375	-0.09468
6.38	-0.32446
6.385	-0.43217
6.39	0.113558
6.395	0.070475
6.4	-0.08032
6.405	-0.47884
6.41	-0.76248
6.415	-0.55783
6.42	0.185364
6.425	-0.33523
6.43	0.271531
6.435	-0.4214
6.44	-0.22393
6.445	-0.24188
6.45	-0.14135
6.455	0.278712
6.46	-0.00851
6.465	-0.46089
6.47	-0.80197
6.475	0.124329
6.48	-0.40704
6.485	-0.80197
6.49	-0.09468
6.495	-0.34241
6.5	0.038162
6.505	-0.43217
6.51	0.13151
6.515	0.088426
6.52	0.303844
6.525	0.196135
6.53	0.411553
6.535	0.113558
6.54	-0.09827
6.545	-0.46807
6.55	-0.0516
6.555	0.149461
6.56	0.027391
6.565	0.354108
6.57	0.228448
6.575	0.300254
6.58	-0.09468
6.585	-0.47884
6.59	0.217677
6.595	-0.36395
6.6	-0.06955
6.605	0.02021
6.61	-0.4932
6.615	-0.87737
6.62	0.009439
6.625	0.648513
6.63	0.066884
6.635	0.835209
6.64	-0.03364
6.645	-0.11981
6.65	-0.75529
6.655	-0.75889
6.66	0.544395
6.665	-0.18803
6.67	0.271531
6.675	0.415144
6.68	0.217677
6.685	0.239219
6.69	-0.346
6.695	-0.52193
6.7	-0.11981
6.705	0.160232
6.71	-0.3101
6.715	2.01283
6.72	-0.0875
6.725	0.228448
6.73	0.275122
6.735	0.081245
6.74	0.059704
6.745	0.526443
6.75	0.009439
6.755	-0.38549
6.76	-0.24188
6.765	-0.10904
6.77	-0.20239
6.775	0.415144
6.78	-0.2347
6.785	0.332567
6.79	-0.04442
6.795	0.515672
6.8	0.522853
6.805	0.37565
6.81	0.896244
6.815	0.573117
6.82	0.583888
6.825	0.558756
6.83	0.411553
6.835	0.935738
6.84	0.544395
6.845	0.145871
6.85	-0.1988
6.855	0.666465
6.86	0.066884
6.865	-0.01928
6.87	0.092016
6.875	0.433095
6.88	0.059704
6.885	0.074065
6.89	-0.04442
6.895	-0.56142
6.9	0.077655
6.905	-0.44294
6.91	-0.51834
6.915	0.303844
6.92	0.027391
6.925	0.522853
6.93	0.583888
6.935	0.504901
6.94	-0.1629
6.945	-0.81274
6.95	-0.68349
6.955	0.174593
6.96	0.49054
6.965	0.562346
6.97	-0.85941
6.975	-0.61168
6.98	0.034571
6.985	0.052523
6.99	0.188955
6.995	0.874702
7	0.163822
7.005	0.476179
7.01	0.472588
7.015	0.397192
7.02	0.192545
7.025	-0.24547
7.03	-0.08391
7.035	0.537214
7.04	0.458227
7.045	0.763403
7.05	0.145871
7.055	0.630562
7.06	0.84957
7.065	0.713139
7.07	-0.05519
7.075	0.307435
7.08	0.429505
7.085	0.260761
7.09	0.214087
7.095	-0.15212
7.1	-0.17726
7.105	0.203316
7.11	0.885473
7.115	-0.28138
7.12	0.084836
7.125	-0.07673
7.13	0.472588
7.135	-0.3819
7.14	-0.03364
7.145	0.25717
7.15	0.01303
7.155	0.451047
7.16	-0.0875
7.165	-0.10904
7.17	0.074065
7.175	0.095607
7.18	0.774174
7.185	0.142281
7.19	0.192545
7.195	0.458227
7.2	0.318205
7.205	0.267941
7.21	-0.47525
7.215	-0.04801
7.22	-0.78761
7.225	0.37206
7.23	-0.24547
7.235	0.60543
7.24	0.214087
7.245	-0.11981
7.25	-0.50397
7.255	-0.2706
7.26	-0.15212
7.265	0.267941
7.27	-0.15212
7.275	0.519262
7.28	-0.11263
7.285	-0.22752
7.29	0.932147
7.295	-0.34241
7.3	-0.0121
7.305	-0.00851
7.31	-0.24547
7.315	-0.1988
7.32	0.321796
7.325	0.407963
7.33	0.48695
7.335	-0.1988
7.34	-0.32087
7.345	0.095607
7.35	0.045342
7.355	0.099197
7.36	-0.25265
7.365	-0.21675
7.37	0.267941
7.375	-0.41063
7.38	-0.31369
7.385	0.099197
7.39	0.178184
7.395	0.37565
7.4	0.72391
7.405	0.36847
7.41	-0.37472
7.415	-0.01569
7.42	-0.37831
7.425	0.332567
7.43	0.73109
7.435	-0.04801
7.44	1.47787
7.445	0.37565
7.45	-0.38908
7.455	-0.08032
7.46	0.433095
7.465	-0.2706
7.47	0.400782
7.475	-0.67272
7.48	0.117148
7.485	0.354108
7.49	0.504901
7.495	-0.03364
7.5	0.454637
7.505	0.167413
7.51	0.156642
7.515	0.734681
7.52	0.497721
7.525	-0.7158
7.53	-0.35318
7.535	0.472588
7.54	0.670055
7.545	0.02021
7.55	0.680826
7.555	-0.66195
7.56	-0.25265
7.565	-0.03005
7.57	-0.25983
7.575	0.077655
7.58	-0.05878
7.585	-0.20957
7.59	0.01662
7.595	0.13869
7.6	-0.19521
7.605	-0.06596
7.61	0.056113
7.615	-0.00133
7.62	-0.07314
7.625	0.271531
7.63	0.519262
7.635	-0.04801
7.64	-0.14135
7.645	0.009439
7.65	-0.02287
7.655	0.01662
7.66	-0.03005
7.665	-0.17726
7.67	0.569527
7.675	-0.42499
7.68	0.49054
7.685	0.407963
7.69	0.070475
7.695	0.232038
7.7	-0.16649
7.705	-0.23829
7.71	0.684416
7.715	0.824438
7.72	0.242809
7.725	0.271531
7.73	0.339747
7.735	0.407963
7.74	0.996773
7.745	1.63944
7.75	0.472588
7.755	-0.00492
7.76	0.350518
7.765	0.246399
7.77	-0.11263
7.775	0.652104
7.78	-0.11622
7.785	-0.33164
7.79	-0.30651
7.795	-0.04801
7.8	-0.346
7.805	-0.39986
7.81	-0.10186
7.815	-0.39267
7.82	-0.00133
7.825	0.02021
7.83	-0.68708
7.835	0.364879
7.84	0.045342
7.845	-0.8271
7.85	-0.22393
7.855	-0.79838
7.86	0.038162
7.865	-0.10545
7.87	0.181774
7.875	0.188955
7.88	-0.6045
7.885	1.00395
7.89	-0.07314
7.895	0.889064
7.9	-0.38549
7.905	0.246399
7.91	0.034571
7.915	-0.32446
7.92	-0.4573
7.925	-0.32087
7.93	0.117148
7.935	-0.13058
7.94	-0.2706
7.945	0.282302
7.95	-0.00133
7.955	0.598249
7.96	0.246399
7.965	0.214087
7.97	-0.33164
7.975	-0.53629
7.98	0.13869
7.985	0.512082
7.99	0.163822
7.995	0.479769
8	0.630562
8.005	0.328976
8.01	-0.13776
8.015	-0.28497
8.02	-0.22393
8.025	-0.67272
8.03	-0.23111
8.035	-0.0516
8.04	0.24999
8.045	-0.50038
8.05	0.343338
8.055	1.0255
8.06	-0.16649
8.065	-0.48602
8.07	0.307435
8.075	0.688007
8.08	-0.52552
8.085	-0.00133
8.09	0.698778
8.095	-0.27419
8.1	-0.62963
8.105	-0.09468
8.11	-0.53988
8.115	0.271531
8.12	-1.02816
8.125	0.106378
8.13	0.311025
8.135	0.314615
8.14	-0.38908
8.145	0.472588
8.15	0.199725
8.155	0.339747
8.16	-0.28856
8.165	-0.28856
8.17	0.113558
8.175	-0.30651
8.18	-0.20598
8.185	-0.15571
8.19	0.515672
8.195	-0.08032
8.2	0.203316
8.205	0.400782
8.21	0.052523
8.215	0.311025
8.22	0.307435
8.225	-0.44653
8.23	-0.07673
8.235	-0.28856
8.24	0.224858
8.245	-0.83069
8.25	0.13151
8.255	-0.15571
8.26	0.565936
8.265	-0.1593
8.27	0.483359
8.275	-0.03723
8.28	0.188955
8.285	0.501311
8.29	0.127919
8.295	-0.13417
8.3	0.005849
8.305	-0.23111
8.31	-0.73016
8.315	0.095607
8.32	0.088426
8.325	-0.76607
8.33	0.092016
8.335	-0.13417
8.34	-0.71221
8.345	-0.71939
8.35	0.555165
8.355	-0.14494
8.36	-0.40345
8.365	0.451047
8.37	-0.02287
8.375	-0.45012
8.38	0.052523
8.385	-0.06596
8.39	0.300254
8.395	0.325386
8.4	0.436685
8.405	-0.39626
8.41	-0.26701
8.415	-0.6799
8.42	0.666465
8.425	-0.1629
8.43	0.027391
8.435	-0.57219
8.44	-0.3819
8.445	0.088426
8.45	-0.20957
8.455	0.235628
8.46	0.041752
8.465	-1.24358
8.47	-0.36395
8.475	-0.01569
8.48	0.027391
8.485	-0.49679
8.49	-0.30292
8.495	-0.03005
8.5	0.415144
8.505	-0.71221
8.51	0.045342
8.515	-0.0875
8.52	0.386421
8.525	-0.11981
8.53	0.246399
8.535	0.142281
8.54	0.411553
8.545	-0.34959
8.55	-0.06955
8.555	-0.06237
8.56	-0.23111
8.565	0.422324
8.57	-0.15571
8.575	0.160232
8.58	-0.40704
8.585	-0.08391
8.59	-0.39986
8.595	-0.34241
8.6	0.275122
8.605	0.533624
8.61	-0.1629
8.615	0.37206
8.62	-0.17726
8.625	-0.55065
8.63	0.418734
8.635	0.303844
8.64	0.580298
8.645	0.271531
8.65	-0.09827
8.655	-0.1593
8.66	-0.20598
8.665	-0.55424
8.67	0.271531
8.675	0.407963
8.68	-0.10186
8.685	-0.49679
8.69	0.379241
8.695	0.192545
8.7	0.565936
8.705	0.099197
8.71	0.034571
8.715	-0.346
8.72	0.311025
8.725	-0.13417
8.73	0.224858
8.735	-0.52911
8.74	-0.63322
8.745	-0.43935
8.75	-0.39267
8.755	-0.57578
8.76	-1.11792
8.765	0.052523
8.77	-0.22393
8.775	0.300254
8.78	-0.21675
8.785	-0.10904
8.79	-0.51474
8.795	0.390012
8.8	-0.30651
8.805	-0.88455
8.81	0.185364
8.815	0.522853
8.82	-0.18444
8.825	0.336157
8.83	0.443866
8.835	0.540804
8.84	-0.40704
8.845	0.551575
8.85	-0.0516
8.855	0.558756
8.86	-0.346
8.865	0.25717
8.87	-0.67631
8.875	-0.63322
8.88	0.382831
8.885	1.23732
8.89	0.088426
8.895	0.946509
8.9	0.275122
8.905	0.468998
8.91	0.346928
8.915	-0.2706
8.92	-0.43576
8.925	-0.20239
8.93	-0.53629
8.935	0.232038
8.94	-0.74093
8.945	-0.27419
8.95	0.01662
8.955	0.070475
8.96	0.163822
8.965	0.558756
8.97	0.009439
8.975	-0.04442
8.98	-0.98148
8.985	0.153051
8.99	0.705958
8.995	0.178184
9	-0.13776
9.005	0.005849
9.01	-0.56142
9.015	0.264351
9.02	-0.31369
9.025	-0.32087
9.03	-0.45012
9.035	-0.48243
9.04	0.156642
9.045	-0.75889
9.05	-0.64759
9.055	-0.06955
9.06	-0.21316
9.065	0.171003
9.07	-0.78761
9.075	-0.18444
9.08	-0.57937
9.085	-0.02287
9.09	-0.61886
9.095	0.289483
9.1	-0.70862
9.105	-0.56142
9.11	-0.00851
9.115	0.282302
9.12	-0.23111
9.125	-0.30651
9.13	0.691597
9.135	-0.27778
9.14	-0.09109
9.145	-0.33164
9.15	-0.14853
9.155	0.092016
9.16	0.081245
9.165	0.196135
9.17	-0.1629
9.175	0.088426
9.18	0.217677
9.185	0.192545
9.19	0.153051
9.195	-0.36395
9.2	-0.55424
9.205	0.835209
9.21	0.562346
9.215	0.264351
9.22	-0.03005
9.225	0.1351
9.23	0.285893
9.235	0.030981
9.24	-0.07673
9.245	0.443866
9.25	-0.09109
9.255	-0.11622
9.26	0.153051
9.265	0.296664
9.27	0.565936
9.275	0.246399
9.28	-0.77684
9.285	-0.47525
9.29	-0.39626
9.295	0.088426
9.3	0.052523
9.305	0.02021
9.31	0.25358
9.315	0.36847
9.32	-0.74811
9.325	-0.68708
9.33	0.296664
9.335	0.289483
9.34	-0.1629
9.345	0.178184
9.35	-0.61886
9.355	-0.13058
9.36	0.547985
9.365	0.163822
9.37	-0.15571
9.375	-0.14135
9.38	0.831619
9.385	0.479769
9.39	0.820848
9.395	0.314615
9.4	-0.34241
9.405	-0.13417
9.41	0.153051
9.415	-0.51115
9.42	0.598249
9.425	-0.55424
9.43	-0.09827
9.435	0.307435
9.44	-0.01569
9.445	-0.5686
9.45	-0.06955
9.455	-0.08032
9.46	-0.03364
9.465	0.314615
9.47	-0.43935
9.475	0.37206
9.48	-0.07314
9.485	-0.13417
9.49	0.149461
9.495	-0.47525
9.5	0.874702
9.505	-0.31369
9.51	0.092016
9.515	-0.4214
9.52	0.070475
9.525	0.666465
9.53	0.522853
9.535	0.13869
9.54	-0.02287
9.545	-0.19521
9.55	0.178184
9.555	0.440276
9.56	-0.03364
9.565	0.185364
9.57	0.267941
9.575	0.591068
9.58	0.616201
9.585	0.982412
9.59	-0.01928
9.595	0.497721
9.6	0.188955
9.605	0.113558
9.61	-0.35677
9.615	0.171003
9.62	0.479769
9.625	-1.14664
9.63	0.364879
9.635	0.24999
9.64	-0.55424
9.645	-0.10545
9.65	0.37565
9.655	0.260761
9.66	0.052523
9.665	-0.06237
9.67	0.070475
9.675	0.163822
9.68	-0.34241
9.685	0.774174
9.69	-0.45012
9.695	0.235628
9.7	0.02021
9.705	0.72391
9.71	0.260761
9.715	0.537214
9.72	-0.17726
9.725	-0.5327
9.73	-0.07314
9.735	0.37565
9.74	-0.18803
9.745	-0.06596
9.75	0.210496
9.755	0.1351
9.76	-0.10904
9.765	0.325386
9.77	0.188955
9.775	0.530033
9.78	0.422324
9.785	-0.44294
9.79	-0.1988
9.795	-0.42499
9.8	0.074065
9.805	-0.41781
9.81	0.153051
9.815	0.084836
9.82	0.196135
9.825	0.030981
9.83	-0.27778
9.835	0.167413
9.84	-0.17008
9.845	0.411553
9.85	-0.0516
9.855	0.239219
9.86	-0.06237
9.865	-0.09468
9.87	0.350518
9.875	0.059704
9.88	0.188955
9.885	-2.27399
9.89	-0.76248
9.895	-0.74452
9.9	-0.24547
9.905	0.289483
9.91	0.106378
9.915	0.1351
9.92	-1.02098
9.925	-0.28138
9.93	-0.40704
9.935	-0.4214
9.94	0.451047
9.945	-0.07673
9.95	-0.76966
9.955	-0.03364
9.96	0.203316
9.965	0.411553
9.97	-0.43935
9.975	-0.09468
9.98	-0.08032
9.985	0.433095
[truncated: 60,003 more rows]
