# Supplementary material for: Soluble amyloid-β precursor peptide does not regulate GABAB receptor activity
Source: eLife. 2023 Jan 23;12:e82082. doi: 10.7554/eLife.82082 (PMC9917443; doi:10.7554/eLife.82082)
Supplement: Figure 8—source data 1. [file elife-82082-fig8-data1.xlsx]

## Sheet: Fig.8a
Trace (top) 5 µM APP17 / 5 µM APP17 + 5 µM baclofen							Trace (bottom) 5 µM sc-APP17 / 5 µM sc-APP17 + 5 µM baclofen
Time (min)							Time (min)
0	-0.08771						0	-0.20265
8.33e-05	0.245907						8.33e-05	0.073946
0.000167	0.260186						0.000167	0.268942
0.00025	0.326929						0.00025	0.113542
0.000333	-0.02997						0.000333	0.040959
0.000417	0.072643						0.000417	0.268648
0.0005	0.054956						0.0005	0.411121
0.000583	-0.31372						0.000583	0.401868
0.000667	0.142241						0.000667	-0.38855
0.00075	0.085413						0.00075	-1.96344
0.000833	0.316428						0.000833	-0.60725
0.000917	0.027897						0.000917	0.304118
0.001	-1.11198						0.001	0.133473
0.001083	-0.57656						0.001083	-0.86698
0.001167	0.17548						0.001167	-0.34774
0.00125	0.197104						0.00125	0.054439
0.001333	0.212229						0.001333	-0.24657
0.001417	0.284866						0.001417	-0.297
0.0015	0.041016						0.0015	0.190899
0.001583	-0.11088						0.001583	0.502625
0.001667	0.122335						0.001667	0.547301
0.00175	-0.96588						0.00175	0.370745
0.001833	-0.24429						0.001833	-0.46598
0.001917	-0.05061						0.001917	-0.12615
0.002	0.087187						0.002	0.177791
0.002083	0.277733						0.002083	-0.49891
0.002167	0.052273						0.002167	-0.2818
0.00225	0.145919						0.00225	-0.2073
0.002333	0.240417						0.002333	-0.8057
0.002417	0.265336						0.002417	-0.43766
0.0025	0.337531						0.0025	-0.0142
0.002583	0.010307						0.002583	0.379455
0.002667	0.133747						0.002667	-0.05531
0.00275	0.211887						0.00275	-0.10509
0.002833	0.252788						0.002833	-0.03523
0.002917	-0.0382						0.002917	-0.16341
0.003	-0.00125						0.003	0.021395
0.003083	0.202679						0.003083	-0.6338
0.003167	0.345474						0.003167	-0.70369
0.00325	0.141415						0.00325	-0.12982
0.003333	-1.01084						0.003333	0.297146
0.003417	-0.37163						0.003417	0.393742
0.0035	0.116292						0.0035	0.48108
0.003583	0.120619						0.003583	0.229129
0.003667	-0.26192						0.003667	0.223899
0.00375	-0.09039						0.00375	0.277082
0.003833	-0.10868						0.003833	0.304288
0.003917	-0.3382						0.003917	0.311732
0.004	-0.28361						0.004	0.375188
0.004083	-0.68445						0.004083	0.191829
0.004167	-0.41691						0.004167	-0.60836
0.00425	-0.17974						0.00425	-0.67717
0.004333	0.041723						0.004333	-0.14316
0.004417	-0.06283						0.004417	0.373229
0.0045	0.085555						0.0045	-0.05974
0.004583	0.219793						0.004583	0.099521
0.004667	0.206393						0.004667	0.289639
0.00475	0.330824						0.00475	0.307722
0.004833	0.258842						0.004833	0.296926
0.004917	0.381203						0.004917	0.536565
0.005	0.288055						0.005	0.459773
0.005083	-0.06071						0.005083	0.154746
0.005167	0.161689						0.005167	-0.39771
0.00525	0.207791						0.00525	-0.75606
0.005333	0.270905						0.005333	-0.03401
0.005417	0.242329						0.005417	-0.05746
0.0055	-0.06918						0.0055	0.055645
0.005583	0.09504						0.005583	0.487317
0.005667	0.272841						0.005667	0.609673
0.00575	-0.06206						0.00575	0.496127
0.005833	-0.23737						0.005833	0.311605
0.005917	-0.31937						0.005917	0.254389
0.006	-1.81068						0.006	0.335146
0.006083	-0.61251						0.006083	0.411532
0.006167	-0.04068						0.006167	0.329292
0.00625	0.086803						0.00625	0.388138
0.006333	0.127139						0.006333	0.438193
0.006417	-0.91374						0.006417	0.001836
0.0065	-0.38215						0.0065	-0.13087
0.006583	0.018102						0.006583	0.323043
0.006667	-0.2517						0.006667	0.010727
0.00675	0.141711						0.00675	-0.66459
0.006833	0.27965						0.006833	-1.02873
0.006917	0.269086						0.006917	-0.95305
0.007	0.04622						0.007	-0.75812
0.007083	-0.1911						0.007083	-0.3832
0.007167	-0.27674						0.007167	-0.00396
0.00725	0.101388						0.00725	0.190146
0.007333	0.261704						0.007333	-0.3188
0.007417	0.190511						0.007417	-0.29929
0.0075	-0.18069						0.0075	-0.06091
0.007583	0.039741						0.007583	0.07205
0.007667	0.257853						0.007667	0.231322
0.00775	0.236244						0.00775	0.129356
0.007833	0.036145						0.007833	-0.22201
0.007917	-0.79765						0.007917	-0.08706
0.008	-0.10985						0.008	-0.81742
0.008083	0.092006						0.008083	-0.30903
0.008167	0.360103						0.008167	-0.0834
0.00825	0.383584						0.00825	-0.39395
0.008333	0.263565						0.008333	-1.11185
0.008417	0.029329						0.008417	-0.52239
0.0085	-0.37733						0.0085	-0.1608
0.008583	0.025108						0.008583	-0.4086
0.008667	-0.62638						0.008667	-0.29854
0.00875	-0.34905						0.00875	0.031239
0.008833	-0.00542						0.008833	-0.25068
0.008917	-0.04164						0.008917	0.013789
0.009	0.156344						0.009	-0.18031
0.009083	0.191747						0.009083	-0.07606
0.009167	0.28395						0.009167	0.096259
0.00925	0.16579						0.00925	0.170107
0.009333	0.159613						0.009333	0.159733
0.009417	0.32482						0.009417	0.053905
0.0095	0.269085						0.0095	-0.06853
0.009583	0.327296						0.009583	-0.3406
0.009667	0.340078						0.009667	-0.48685
0.00975	0.308893						0.00975	-0.18644
0.009833	0.427055						0.009833	-0.25644
0.009917	0.301968						0.009917	-1.14672
0.01	0.126962						0.01	-0.38811
0.010083	0.028564						0.010083	-0.72545
0.010167	0.202721						0.010167	-0.39086
0.01025	0.258928						0.01025	0.002828
0.010333	0.327645						0.010333	-0.35755
0.010417	0.340226						0.010417	0.193328
0.0105	0.405787						0.0105	0.492713
0.010583	0.201859						0.010583	0.263898
0.010667	0.295973						0.010667	-1.06032
0.01075	-0.21014						0.01075	-0.5233
0.010833	-0.08349						0.010833	-0.04369
0.010917	-0.5375						0.010917	-0.19361
0.011	-0.31089						0.011	0.279573
0.011083	-0.8576						0.011083	0.012307
0.011167	-0.14286						0.011167	-0.93094
0.01125	-0.04071						0.01125	-1.12671
0.011333	-0.10657						0.011333	-1.29803
0.011417	0.052517						0.011417	-0.42868
0.0115	0.147957						0.0115	-0.00424
0.011583	0.182977						0.011583	-0.3869
0.011667	0.031505						0.011667	-0.40489
0.01175	-0.16468						0.01175	-0.00517
0.011833	-0.04379						0.011833	0.151435
0.011917	-0.04446						0.011917	-0.1965
0.012	0.038085						0.012	-0.90681
0.012083	0.135339						0.012083	-0.54356
0.012167	0.225878						0.012167	-0.7554
0.01225	0.228285						0.01225	-0.19358
0.012333	0.22893						0.012333	-0.06054
0.012417	0.204852						0.012417	-0.35002
0.0125	0.14596						0.0125	-0.42907
0.012583	-0.07723						0.012583	-0.13159
0.012667	-0.05187						0.012667	-0.34116
0.01275	0.163253						0.01275	-0.36994
0.012833	0.056338						0.012833	0.0785
0.012917	-0.34183						0.012917	0.315391
0.013	0.017384						0.013	0.200687
0.013083	0.252743						0.013083	0.022537
0.013167	0.406339						0.013167	0.229677
0.01325	0.378891						0.01325	0.230291
0.013333	0.268249						0.013333	0.200466
0.013417	0.31899						0.013417	0.092783
0.0135	-0.14189						0.0135	0.130333
0.013583	0.077182						0.013583	0.089409
0.013667	-0.1343						0.013667	0.069823
0.01375	-0.06185						0.01375	0.255773
0.013833	0.241063						0.013833	0.220456
0.013917	0.211827						0.013917	0.189693
0.014	0.074491						0.014	0.339493
0.014083	-0.29883						0.014083	0.198837
0.014167	0.073922						0.014167	-0.8823
0.01425	0.41426						0.01425	-1.07347
0.014333	0.412106						0.014333	-0.11328
0.014417	0.450439						0.014417	0.085049
0.0145	0.330851						0.0145	-0.0715
0.014583	0.27657						0.014583	0.109406
0.014667	0.297152						0.014667	0.140356
0.01475	0.336264						0.01475	0.144405
0.014833	0.3943						0.014833	0.001664
0.014917	0.318828						0.014917	0.376234
0.015	0.365013						0.015	0.140585
0.015083	0.32947						0.015083	0.454163
0.015167	0.327386						0.015167	0.51967
0.01525	-0.03402						0.01525	0.613083
0.015333	-0.84182						0.015333	0.390333
0.015417	-0.47178						0.015417	0.355532
0.0155	-0.30705						0.0155	0.313176
0.015583	-0.10715						0.015583	0.381657
0.015667	0.222152						0.015667	-0.27111
0.01575	0.188956						0.01575	-0.15415
0.015833	0.272936						0.015833	0.20044
0.015917	0.216023						0.015917	0.40791
0.016	0.207476						0.016	0.372294
0.016083	0.002207						0.016083	0.690291
0.016167	-0.0206						0.016167	0.424547
0.01625	0.175363						0.01625	0.481884
0.016333	0.21894						0.016333	0.387516
0.016417	0.421459						0.016417	0.448693
0.0165	0.269981						0.0165	0.490428
0.016583	0.362179						0.016583	-0.17588
0.016667	0.311141						0.016667	-0.06698
0.01675	0.194558						0.01675	-0.23063
0.016833	0.066227						0.016833	-0.64226
0.016917	0.254301						0.016917	-0.01093
0.017	0.289718						0.017	0.274296
0.017083	0.15297						0.017083	0.369587
0.017167	0.309923						0.017167	0.452235
0.01725	0.363525						0.01725	0.358612
0.017333	0.407743						0.017333	0.15096
0.017417	0.549866						0.017417	0.310565
0.0175	0.511737						0.0175	-0.09095
0.017583	0.426077						0.017583	-0.06096
0.017667	0.387674						0.017667	0.021465
0.01775	0.218151						0.01775	-0.03666
0.017833	0.264843						0.017833	-0.1458
0.017917	-0.21833						0.017917	-0.65154
0.018	-0.96238						0.018	-0.37043
0.018083	-0.62507						0.018083	-0.01198
0.018167	-0.21735						0.018167	0.325729
0.01825	0.061355						0.01825	0.454495
0.018333	0.20285						0.018333	0.436933
0.018417	0.209937						0.018417	0.230703
0.0185	0.296297						0.0185	0.076093
0.018583	0.220221						0.018583	-0.54577
0.018667	0.094585						0.018667	-0.8546
0.01875	0.14979						0.01875	-0.74516
0.018833	0.250153						0.018833	-0.23004
0.018917	-0.32834						0.018917	-0.03662
0.019	-0.20539						0.019	-0.03093
0.019083	-0.01098						0.019083	-0.06997
0.019167	0.170967						0.019167	-0.30776
0.01925	0.194641						0.01925	0.045085
0.019333	0.108719						0.019333	0.354763
0.019417	-0.17092						0.019417	0.50255
0.0195	-0.21695						0.0195	0.050809
0.019583	-0.09147						0.019583	0.435708
0.019667	-0.29239						0.019667	0.563761
0.01975	-0.14053						0.01975	0.34414
0.019833	-0.22081						0.019833	0.215062
0.019917	0.139867						0.019917	0.499219
0.02	0.1913						0.02	0.403829
0.020083	0.258691						0.020083	0.281321
0.020167	-0.10686						0.020167	0.385326
0.02025	0.05673						0.02025	0.022131
0.020333	0.147995						0.020333	0.163916
0.020417	0.254873						0.020417	0.073501
0.0205	-0.04735						0.0205	-1.44148
0.020583	0.224613						0.020583	-0.72698
0.020667	0.232184						0.020667	-0.19471
0.02075	0.170374						0.02075	0.073255
0.020833	0.28356						0.020833	0.262875
0.020917	0.335802						0.020917	-0.33472
0.021	0.298895						0.021	-0.53081
0.021083	0.22806						0.021083	-0.94396
0.021167	0.187297						0.021167	-0.37927
0.02125	0.194259						0.02125	-0.1187
0.021333	0.147226						0.021333	-0.00081
0.021417	0.002001						0.021417	0.166224
0.0215	-0.16489						0.0215	0.246344
0.021583	-0.29337						0.021583	0.256936
0.021667	-0.01663						0.021667	0.233839
0.02175	0.123805						0.02175	-0.34842
0.021833	0.207885						0.021833	-0.22705
0.021917	-0.52601						0.021917	0.288315
0.022	-0.04351						0.022	0.37065
0.022083	0.275626						0.022083	0.306082
0.022167	0.121907						0.022167	0.632865
0.02225	-0.22153						0.02225	0.560756
0.022333	-0.37167						0.022333	0.156001
0.022417	-1.00559						0.022417	-0.25939
0.0225	-0.97497						0.0225	-0.30055
0.022583	-0.60067						0.022583	-0.23804
0.022667	-0.24674						0.022667	0.04658
0.02275	-0.12747						0.02275	0.209468
0.022833	0.037194						0.022833	0.250788
0.022917	-0.12464						0.022917	0.300793
0.023	-0.36238						0.023	0.056693
0.023083	-0.1329						0.023083	-0.59829
0.023167	0.157145						0.023167	-0.2166
0.02325	0.207354						0.02325	-0.26603
0.023333	0.253863						0.023333	-0.12537
0.023417	-0.42689						0.023417	0.152449
0.0235	0.118999						0.0235	0.006726
0.023583	-0.06883						0.023583	0.116739
0.023667	0.222623						0.023667	-0.10566
0.02375	0.173061						0.02375	-0.13943
0.023833	0.116187						0.023833	0.15892
0.023917	0.121065						0.023917	0.509722
0.024	-0.10232						0.024	0.857052
0.024083	-0.43614						0.024083	0.714019
0.024167	-0.33361						0.024167	0.396354
0.02425	-0.57998						0.02425	0.256222
0.024333	-0.06066						0.024333	0.112498
0.024417	0.192131						0.024417	0.347396
0.0245	0.15735						0.0245	0.175298
0.024583	-0.09141						0.024583	-0.00155
0.024667	-0.23816						0.024667	-0.78174
0.02475	-0.09562						0.02475	-0.44613
0.024833	-0.01905						0.024833	0.200177
0.024917	0.030733						0.024917	0.099277
0.025	0.165036						0.025	0.522753
0.025083	0.298369						0.025083	0.108375
0.025167	0.237298						0.025167	-0.87058
0.02525	-0.44676						0.02525	-0.92278
0.025333	0.0449						0.025333	-0.23095
0.025417	0.299382						0.025417	0.020566
0.0255	0.193105						0.0255	0.485943
0.025583	-0.26911						0.025583	0.536781
0.025667	0.090029						0.025667	0.371803
0.02575	0.131703						0.02575	0.320391
0.025833	0.198464						0.025833	0.26376
0.025917	0.04891						0.025917	0.507386
0.026	0.152172						0.026	-0.01557
0.026083	0.059521						0.026083	0.276945
0.026167	0.322799						0.026167	0.232677
0.02625	0.423676						0.02625	-0.17001
0.026333	0.426733						0.026333	-1.0251
0.026417	0.51473						0.026417	-0.62499
0.0265	0.077647						0.0265	-0.61587
0.026583	-0.11941						0.026583	-0.01226
0.026667	0.038181						0.026667	0.051766
0.02675	-0.41183						0.02675	-0.42289
0.026833	-0.43393						0.026833	0.008215
0.026917	0.0171						0.026917	0.216623
0.027	0.12744						0.027	0.243345
0.027083	-0.31963						0.027083	0.009785
0.027167	0.163955						0.027167	0.389472
0.02725	0.346712						0.02725	0.264757
0.027333	0.369467						0.027333	-1.21203
0.027417	0.353278						0.027417	-0.35683
0.0275	0.284124						0.0275	-0.06299
0.027583	0.232884						0.027583	0.139513
0.027667	0.300914						0.027667	0.041773
0.02775	0.044284						0.02775	0.031117
0.027833	-0.40779						0.027833	-0.42258
0.027917	0.021007						0.027917	-0.81468
0.028	0.172533						0.028	-0.61306
0.028083	0.202841						0.028083	-0.72936
0.028167	0.311565						0.028167	-1.03119
0.02825	-0.13277						0.02825	-0.4276
0.028333	0.020633						0.028333	-0.13306
0.028417	-0.22177						0.028417	-0.15239
0.0285	-0.17281						0.0285	0.058213
0.028583	-0.2451						0.028583	0.240862
0.028667	-1.15922						0.028667	0.202968
0.02875	-1.00494						0.02875	0.368601
0.028833	-0.43829						0.028833	0.240644
0.028917	-0.1503						0.028917	0.318708
0.029	-0.04454						0.029	0.099143
0.029083	-0.08333						0.029083	-0.14825
0.029167	0.073729						0.029167	-0.32638
0.02925	-0.36866						0.02925	0.388163
0.029333	0.009624						0.029333	0.278481
0.029417	-0.04						0.029417	0.110049
0.0295	-0.24611						0.0295	0.337018
0.029583	-0.00501						0.029583	0.330727
0.029667	-0.34639						0.029667	0.446751
0.02975	-0.42652						0.02975	0.306618
0.029833	-0.27775						0.029833	0.476807
0.029917	-0.3069						0.029917	0.209799
0.03	-0.21336						0.03	-0.07304
0.030083	-0.10859						0.030083	0.220651
0.030167	-0.55936						0.030167	0.35291
0.03025	-0.29826						0.03025	0.388513
0.030333	-0.04653						0.030333	0.294485
0.030417	-0.27917						0.030417	-0.59356
0.0305	-0.20064						0.0305	-1.85677
0.030583	0.134299						0.030583	-1.52114
0.030667	-0.38655						0.030667	-0.25888
0.03075	-0.75484						0.03075	0.082375
0.030833	-0.14083						0.030833	-0.14864
0.030917	0.01827						0.030917	-0.77459
0.031	-0.1191						0.031	-0.38097
0.031083	-0.42461						0.031083	-0.18997
0.031167	-0.00556						0.031167	-0.32582
0.03125	0.079272						0.03125	-0.87644
0.031333	0.067858						0.031333	-1.39816
0.031417	0.018048						0.031417	-0.61629
0.0315	-0.0462						0.0315	-0.70698
0.031583	-0.1129						0.031583	-0.37405
0.031667	-0.2434						0.031667	-0.32678
0.03175	-0.27709						0.03175	-0.15251
0.031833	-0.09971						0.031833	0.193311
0.031917	0.051832						0.031917	0.029649
0.032	-0.10989						0.032	0.104214
0.032083	-0.23066						0.032083	0.232828
0.032167	-0.16909						0.032167	-0.1273
0.03225	0.079272						0.03225	-0.46248
0.032333	-0.00555						0.032333	0.040928
0.032417	-0.01979						0.032417	0.254812
0.0325	0.010309						0.0325	-0.02577
0.032583	0.011908						0.032583	-1.4338
0.032667	-0.58612						0.032667	-0.52866
0.03275	-0.39054						0.03275	-0.05379
0.032833	-0.20898						0.032833	-0.11704
0.032917	0.014462						0.032917	-0.1081
0.033	-0.02529						0.033	-0.08546
0.033083	-0.14505						0.033083	0.238888
0.033167	0.13719						0.033167	0.281979
0.03325	-0.69523						0.03325	0.426721
0.033333	-0.53505						0.033333	0.451372
0.033417	-0.53958						0.033417	0.268361
0.0335	-0.09821						0.0335	-0.01346
0.033583	0.021291						0.033583	-0.0223
0.033667	-0.02689						0.033667	0.269234
0.03375	-0.73038						0.03375	0.146952
0.033833	-0.27548						0.033833	-0.53569
0.033917	-0.00977						0.033917	0.023825
0.034	0.086086						0.034	0.325253
0.034083	-0.17911						0.034083	0.452898
0.034167	0.02361						0.034167	0.362213
0.03425	0.112693						0.03425	0.506857
0.034333	0.116376						0.034333	0.394489
0.034417	-0.29927						0.034417	0.244578
0.0345	-0.3391						0.0345	0.315746
0.034583	-0.08583						0.034583	0.356325
0.034667	0.139403						0.034667	0.173767
0.03475	0.22056						0.03475	-0.93958
0.034833	-0.03621						0.034833	-0.35117
0.034917	0.078582						0.034917	0.206153
0.035	0.094667						0.035	-0.24773
0.035083	-0.30562						0.035083	-0.09368
0.035167	-0.57579						0.035167	0.112574
0.03525	-0.30343						0.03525	0.411019
0.035333	-0.33799						0.035333	-0.21054
0.035417	-0.23297						0.035417	-0.28111
0.0355	0.077401						0.0355	-0.46226
0.035583	0.094405						0.035583	-0.18287
0.035667	0.084739						0.035667	-0.88026
0.03575	0.215601						0.03575	-1.15584
0.035833	0.333828						0.035833	-0.23704
0.035917	0.339003						0.035917	0.276235
0.036	0.30238						0.036	0.201529
0.036083	0.268386						0.036083	0.198028
0.036167	0.195955						0.036167	-0.20393
0.03625	0.195395						0.03625	0.045755
0.036333	0.211642						0.036333	0.039046
0.036417	0.114326						0.036417	0.171449
0.0365	0.167494						0.0365	-0.20493
0.036583	0.091986						0.036583	-0.14881
0.036667	0.075596						0.036667	0.381349
0.03675	-0.51884						0.03675	0.506985
0.036833	-0.30801						0.036833	0.000153
0.036917	-1.84839						0.036917	0.114222
0.037	-1.16411						0.037	-0.06145
0.037083	-0.94755						0.037083	-0.12332
0.037167	-0.87814						0.037167	0.025175
0.03725	-0.24165						0.03725	0.174374
0.037333	-0.54212						0.037333	-0.22119
0.037417	-1.74872						0.037417	0.181495
0.0375	-1.16824						0.0375	-0.0055
0.037583	-0.24098						0.037583	0.134989
0.037667	0.050596						0.037667	-0.21569
0.03775	-0.66785						0.03775	-0.14289
0.037833	-0.34809						0.037833	0.411839
0.037917	0.048036						0.037917	0.366208
0.038	0.119727						0.038	-0.00227
0.038083	0.027928						0.038083	-0.16788
0.038167	-0.19896						0.038167	0.237279
0.03825	-0.24572						0.03825	0.234708
0.038333	-0.69483						0.038333	0.026713
0.038417	-0.46821						0.038417	-0.09585
0.0385	-0.24231						0.0385	0.1433
0.038583	-0.11545						0.038583	-0.31211
0.038667	-0.22425						0.038667	-0.36998
0.03875	0.018207						0.03875	-0.42832
0.038833	0.188705						0.038833	-0.11704
0.038917	0.08476						0.038917	0.011426
0.039	0.161673						0.039	0.045738
0.039083	0.181212						0.039083	-0.15013
0.039167	0.32917						0.039167	0.173298
0.03925	0.272767						0.03925	0.176868
0.039333	0.24188						0.039333	0.247976
0.039417	-0.02552						0.039417	0.390717
0.0395	0.257146						0.0395	0.404296
0.039583	-0.29217						0.039583	0.437881
0.039667	-0.72581						0.039667	-0.34483
0.03975	-0.10059						0.03975	-0.59711
0.039833	-0.22342						0.039833	-0.17715
0.039917	-9.7e-05						0.039917	-0.20219
0.04	0.038416						0.04	-1.02288
0.040083	0.197379						0.040083	-0.44792
0.040167	0.162884						0.040167	-0.03847
0.04025	0.059199						0.04025	-0.20546
0.040333	0.25595						0.040333	-0.18317
0.040417	-0.07381						0.040417	-0.41807
0.0405	0.089513						0.0405	-0.15782
0.040583	-0.09625						0.040583	0.45429
0.040667	-0.51166						0.040667	-0.02545
0.04075	0.134133						0.04075	0.297875
0.040833	0.303886						0.040833	0.411359
0.040917	0.338902						0.040917	0.426584
0.041	0.310594						0.041	0.327381
0.041083	-0.07556						0.041083	-0.02968
0.041167	0.335146						0.041167	-0.57611
0.04125	0.39077						0.04125	-0.74315
0.041333	0.192031						0.041333	-1.06471
0.041417	0.2118						0.041417	-0.46451
0.0415	0.192603						0.0415	-0.09948
0.041583	0.217638						0.041583	0.115935
0.041667	0.246321						0.041667	0.284986
0.04175	0.331452						0.04175	0.318274
0.041833	0.279375						0.041833	0.279416
0.041917	0.277566						0.041917	0.432372
0.042	0.074378						0.042	0.496048
0.042083	-0.00355						0.042083	0.508415
0.042167	-0.49717						0.042167	0.418033
0.04225	-0.25747						0.04225	0.161946
0.042333	-0.08299						0.042333	-0.69783
0.042417	-0.0428						0.042417	-0.60843
0.0425	-0.09509						0.0425	0.035303
0.042583	0.063041						0.042583	0.32778
0.042667	0.057208						0.042667	0.296596
0.04275	-0.14149						0.04275	-0.52009
0.042833	0.06236						0.042833	-0.64404
0.042917	0.214336						0.042917	-0.34985
0.043	0.011812						0.043	-0.97699
0.043083	-0.34072						0.043083	-0.37256
0.043167	-0.01705						0.043167	-0.68304
0.04325	-0.03856						0.04325	-0.86224
0.043333	-0.08298						0.043333	-0.38905
0.043417	0.103615						0.043417	-0.08354
0.0435	0.124302						0.0435	0.084915
0.043583	0.118871						0.043583	-0.04552
0.043667	-0.03238						0.043667	-0.96576
0.04375	-0.03373						0.04375	-0.97588
0.043833	-0.23866						0.043833	-1.24905
0.043917	-0.1451						0.043917	-0.31985
0.044	-0.31217						0.044	-0.35126
0.044083	-0.58344						0.044083	-0.78742
0.044167	-0.2304						0.044167	-0.19484
0.04425	-0.22278						0.04425	0.048588
0.044333	-0.00314						0.044333	-0.17705
0.044417	0.2299						0.044417	-0.62764
0.0445	-0.34257						0.0445	-1.01485
0.044583	0.104189						0.044583	-1.3016
0.044667	-0.24918						0.044667	-0.76132
0.04475	0.203867						0.04475	-0.52395
0.044833	0.232953						0.044833	-1.0684
0.044917	-0.09024						0.044917	-0.23576
0.045	-0.0061						0.045	0.05193
0.045083	0.024743						0.045083	-0.00843
0.045167	0.207526						0.045167	0.247728
0.04525	0.076824						0.04525	-0.30846
0.045333	-0.14498						0.045333	-0.02484
0.045417	0.071426						0.045417	-0.11745
0.0455	0.142195						0.0455	0.344874
0.045583	0.139819						0.045583	0.335247
0.045667	0.287038						0.045667	-0.02782
0.04575	-0.10448						0.04575	0.036112
0.045833	-0.02967						0.045833	0.094419
0.045917	0.169772						0.045917	0.099176
0.046	-0.22939						0.046	0.044333
0.046083	0.045492						0.046083	-0.96394
0.046167	0.208558						0.046167	-0.72445
0.04625	0.105759						0.04625	-0.65874
0.046333	0.059933						0.046333	-0.04527
0.046417	0.220532						0.046417	0.180588
0.0465	0.203803						0.0465	0.137722
0.046583	-0.2976						0.046583	-0.60315
0.046667	-0.45567						0.046667	-0.42511
0.04675	-0.08061						0.04675	-0.16902
0.046833	-0.11542						0.046833	-0.03372
0.046917	0.065669						0.046917	-0.17427
0.047	0.129788						0.047	-0.89984
0.047083	-0.01599						0.047083	-0.44668
0.047167	-0.59291						0.047167	-0.28575
0.04725	-0.10357						0.04725	-0.81584
0.047333	-0.46604						0.047333	-0.57711
0.047417	0.06568						0.047417	-0.35805
0.0475	0.36296						0.0475	-0.72152
0.047583	0.410026						0.047583	-0.34985
0.047667	0.442463						0.047667	-0.12672
0.04775	0.16138						0.04775	-0.11038
0.047833	0.281426						0.047833	0.050202
0.047917	0.126973						0.047917	-0.12806
0.048	0.314481						0.048	-0.02453
0.048083	-0.8056						0.048083	-0.29754
0.048167	-0.19776						0.048167	-0.21101
0.04825	0.175754						0.04825	-0.3282
0.048333	0.252331						0.048333	-0.05954
0.048417	0.246519						0.048417	-0.60811
0.0485	0.261566						0.0485	-1.10481
0.048583	0.198587						0.048583	-1.07309
0.048667	-0.42						0.048667	-0.26097
0.04875	-0.15855						0.04875	-0.1066
0.048833	-1.30597						0.048833	0.224436
0.048917	-0.34724						0.048917	0.218569
0.049	-0.04785						0.049	0.394585
0.049083	-0.11355						0.049083	0.218287
0.049167	0.165704						0.049167	0.240856
0.04925	-0.385						0.04925	0.013039
0.049333	-0.28832						0.049333	-0.06863
0.049417	0.179701						0.049417	-0.18562
0.0495	0.235046						0.0495	-0.22231
0.049583	0.340221						0.049583	0.073832
0.049667	0.382786						0.049667	-0.43519
0.04975	0.395939						0.04975	-0.05919
0.049833	0.225229						0.049833	-0.19353
0.049917	0.224077						0.049917	-0.42551
0.05	-0.03635						0.05	-0.15158
0.050083	0.156476						0.050083	-0.26608
0.050167	0.2584						0.050167	-0.0514
0.05025	0.405557						0.05025	-0.79148
0.050333	0.515165						0.050333	-0.28267
0.050417	0.327405						0.050417	0.039562
0.0505	0.228699						0.0505	0.327079
0.050583	0.352964						0.050583	0.196816
0.050667	-0.09189						0.050667	0.263462
0.05075	0.023984						0.05075	0.23805
0.050833	0.091729						0.050833	0.184935
0.050917	0.337958						0.050917	-0.12478
0.051	0.230923						0.051	-0.34329
0.051083	0.009392						0.051083	-0.4909
0.051167	0.193481						0.051167	-0.16736
0.05125	0.406445						0.05125	0.010843
0.051333	0.499225						0.051333	-0.25083
0.051417	0.452723						0.051417	-0.24802
0.0515	0.523342						0.0515	-0.5907
0.051583	-0.00402						0.051583	-1.09661
0.051667	-0.08391						0.051667	-0.77231
0.05175	-0.06874						0.05175	-0.45179
0.051833	0.197735						0.051833	-0.88167
0.051917	0.250389						0.051917	-0.37111
0.052	0.304						0.052	-0.16015
0.052083	-0.27613						0.052083	0.080471
0.052167	-0.76954						0.052167	-0.24798
0.05225	-0.10704						0.05225	-1.22194
0.052333	-0.39034						0.052333	-0.47348
0.052417	-0.35796						0.052417	-0.35744
0.0525	0.140204						0.0525	0.177533
0.052583	-0.3218						0.052583	0.258427
0.052667	-1.01876						0.052667	-0.02263
0.05275	-0.5529						0.05275	-0.83008
0.052833	-0.20245						0.052833	-0.5711
0.052917	-0.42444						0.052917	-0.04619
0.053	0.052209						0.053	-0.13975
0.053083	0.20387						0.053083	-0.83369
0.053167	0.248492						0.053167	-0.86771
0.05325	-0.16935						0.05325	-0.31349
0.053333	0.156124						0.053333	-0.99814
0.053417	0.153107						0.053417	-0.37826
0.0535	0.104185						0.0535	0.126621
0.053583	0.253232						0.053583	0.197545
0.053667	0.209742						0.053667	-0.45562
0.05375	-0.11002						0.05375	-0.54942
0.053833	0.000286						0.053833	-0.12816
0.053917	0.217569						0.053917	-0.26527
0.054	0.302855						0.054	-0.04211
0.054083	0.198424						0.054083	0.027342
0.054167	0.197302						0.054167	-0.04835
0.05425	-0.41086						0.05425	-1.00385
0.054333	-1.1763						0.054333	-0.16983
0.054417	-0.42365						0.054417	0.113614
0.0545	0.016501						0.0545	0.083453
0.054583	0.113329						0.054583	0.157783
0.054667	-0.30443						0.054667	-0.04203
0.05475	-0.49846						0.05475	0.026259
0.054833	0.083566						0.054833	0.140853
0.054917	-0.28832						0.054917	0.315297
0.055	0.137404						0.055	0.182004
0.055083	0.275977						0.055083	-0.30554
0.055167	0.439355						0.055167	-0.45329
0.05525	0.403375						0.05525	-0.46304
0.055333	0.346222						0.055333	-0.28256
0.055417	0.248518						0.055417	-0.03785
0.0555	0.359717						0.0555	-0.03812
0.055583	0.347431						0.055583	0.127402
0.055667	0.26721						0.055667	-0.84865
0.05575	0.299371						0.05575	-0.64972
0.055833	0.036464						0.055833	-1.34659
0.055917	0.151351						0.055917	-0.52584
0.056	-0.0682						0.056	0.059534
0.056083	-0.30488						0.056083	-0.1188
0.056167	-0.00621						0.056167	-0.11931
0.05625	0.159739						0.05625	-0.72864
0.056333	0.209664						0.056333	-1.30688
0.056417	0.18301						0.056417	-0.97669
0.0565	0.163448						0.0565	-0.50585
0.056583	0.119344						0.056583	-0.1228
0.056667	-0.28695						0.056667	-0.04371
0.05675	0.134567						0.05675	0.103365
0.056833	0.188332						0.056833	0.039198
0.056917	0.191141						0.056917	-0.11084
0.057	0.19443						0.057	0.077596
0.057083	0.253621						0.057083	-0.15853
0.057167	0.260212						0.057167	-1.35992
0.05725	0.186934						0.05725	-0.96736
0.057333	0.118352						0.057333	-0.57027
0.057417	0.137079						0.057417	-0.61237
0.0575	-0.05531						0.0575	-0.23239
0.057583	-0.01099						0.057583	-0.49555
0.057667	0.181503						0.057667	-0.036
0.05775	-0.14519						0.05775	0.297023
0.057833	0.037136						0.057833	0.360643
0.057917	-0.02238						0.057917	0.182873
0.058	-0.23834						0.058	0.089658
0.058083	-0.36121						0.058083	-0.12611
0.058167	0.039345						0.058167	-0.33008
0.05825	0.097186						0.05825	-0.67407
0.058333	0.243008						0.058333	-1.10364
0.058417	0.023811						0.058417	-0.77169
0.0585	0.162004						0.0585	-2.18529
0.058583	0.028601						0.058583	-1.45673
0.058667	0.153934						0.058667	-0.69991
0.05875	0.135112						0.05875	-0.36967
0.058833	-0.12714						0.058833	-0.0488
0.058917	0.149095						0.058917	0.191842
0.059	-0.11531						0.059	-0.13867
0.059083	0.142357						0.059083	-0.09703
0.059167	-0.36533						0.059167	-0.25581
0.05925	0.020746						0.05925	-0.77945
0.059333	0.273923						0.059333	-0.38593
0.059417	0.340314						0.059417	0.054061
0.0595	0.349715						0.0595	-0.19437
0.059583	0.348811						0.059583	-0.29313
0.059667	0.238191						0.059667	0.120118
0.05975	-0.10659						0.05975	-0.12902
0.059833	-0.22984						0.059833	-0.71787
0.059917	0.136258						0.059917	-0.19896
0.06	0.203054						0.06	0.109781
0.060083	0.337862						0.060083	0.322442
0.060167	0.484382						0.060167	0.152881
0.06025	0.493035						0.06025	0.195179
0.060333	0.331478						0.060333	0.378891
0.060417	0.322586						0.060417	0.269679
0.0605	-0.059						0.0605	-0.15306
0.060583	-0.44532						0.060583	0.17385
0.060667	-0.58339						0.060667	0.514498
0.06075	-0.0721						0.06075	0.343729
0.060833	-0.53243						0.060833	0.27637
0.060917	-0.09991						0.060917	0.100499
0.061	-0.06902						0.061	0.375221
0.061083	0.190178						0.061083	0.363369
0.061167	0.344821						0.061167	0.462134
0.06125	0.21667						0.06125	0.528741
0.061333	0.099607						0.061333	0.450839
0.061417	-0.18705						0.061417	0.377791
0.0615	0.127935						0.0615	-0.29446
0.061583	0.20445						0.061583	-0.02387
0.061667	0.067106						0.061667	-0.17686
0.06175	-0.40166						0.06175	-0.69013
0.061833	-0.12113						0.061833	-0.34402
0.061917	0.269162						0.061917	-0.01718
0.062	0.355156						0.062	-0.0682
0.062083	0.423288						0.062083	-0.33127
0.062167	0.375126						0.062167	-0.44566
0.06225	0.360974						0.06225	-0.45668
0.062333	0.126244						0.062333	-0.208
0.062417	0.062344						0.062417	0.008271
0.0625	-0.38405						0.0625	0.04629
0.062583	0.010373						0.062583	-0.08499
0.062667	0.235068						0.062667	-0.2012
0.06275	0.278388						0.06275	-0.41029
0.062833	0.340788						0.062833	0.086467
0.062917	0.375148						0.062917	0.395225
0.063	0.2795						0.063	0.477528
0.063083	-0.44173						0.063083	0.415042
0.063167	-0.21957						0.063167	-0.22172
0.06325	0.046344						0.06325	-1.04538
0.063333	0.207975						0.063333	-0.83808
0.063417	0.3811						0.063417	-0.0651
0.0635	0.402052						0.0635	0.320105
0.063583	0.46312						0.063583	-0.24039
0.063667	-0.15888						0.063667	-0.00035
0.06375	0.021599						0.06375	0.356141
0.063833	-0.58819						0.063833	0.366611
0.063917	-0.85425						0.063917	-0.08946
0.064	0.009732						0.064	0.17933
0.064083	0.210942						0.064083	-0.06991
0.064167	0.272141						0.064167	-0.73919
0.06425	0.10914						0.06425	-0.6833
0.064333	0.141679						0.064333	-0.50794
0.064417	-0.1381						0.064417	-0.06026
0.0645	0.207771						0.0645	-0.61032
0.064583	-0.22066						0.064583	-0.82358
0.064667	0.175813						0.064667	-1.23741
0.06475	0.251716						0.06475	-0.47326
0.064833	0.264365						0.064833	0.003229
0.064917	0.314269						0.064917	-0.19364
0.065	-0.05765						0.065	0.092983
0.065083	0.063258						0.065083	0.253834
0.065167	0.249993						0.065167	0.19332
0.06525	0.239799						0.06525	0.14194
0.065333	0.129858						0.065333	-0.4466
0.065417	0.034144						0.065417	-0.30731
0.0655	0.153581						0.0655	-0.06141
0.065583	0.259484						0.065583	-0.16873
0.065667	0.293495						0.065667	-0.54582
0.06575	0.177869						0.06575	-0.63776
0.065833	0.303044						0.065833	-0.43722
0.065917	0.344312						0.065917	-0.54857
0.066	0.344037						0.066	-0.25717
0.066083	0.380743						0.066083	0.159619
0.066167	0.168909						0.066167	0.039184
0.06625	-0.65206						0.06625	-0.1302
0.066333	-0.15424						0.066333	-0.39626
0.066417	-0.22684						0.066417	-0.13386
0.0665	0.040519						0.0665	-0.16615
0.066583	-0.07321						0.066583	-0.04102
0.066667	-0.22239						0.066667	0.051362
0.06675	-0.58285						0.06675	-0.30668
0.066833	-0.24709						0.066833	-0.32268
0.066917	-0.31423						0.066917	-0.64758
0.067	0.129656						0.067	-1.50807
0.067083	0.164108						0.067083	-0.73773
0.067167	0.196356						0.067167	-0.5055
0.06725	-0.75841						0.06725	-0.18495
0.067333	-0.64525						0.067333	-0.40449
0.067417	-0.21551						0.067417	-1.08807
0.0675	-0.25106						0.0675	-1.14842
0.067583	-0.18078						0.067583	-0.87318
0.067667	-0.00344						0.067667	-0.83137
0.06775	-0.95325						0.06775	-0.47021
0.067833	-0.54583						0.067833	0.03811
0.067917	-0.14919						0.067917	0.047006
0.068	0.051052						0.068	0.057973
0.068083	0.136583						0.068083	-0.63372
0.068167	0.130332						0.068167	-0.56454
0.06825	-0.47757						0.06825	-0.38234
0.068333	0.021974						0.068333	0.026084
0.068417	0.080171						0.068417	0.365624
0.0685	-0.39632						0.0685	0.364877
0.068583	-0.31128						0.068583	0.319678
0.068667	-0.14065						0.068667	-0.38324
0.06875	-0.02718						0.06875	-0.29638
0.068833	0.067861						0.068833	-0.19748
0.068917	-0.13815						0.068917	-0.24794
0.069	-0.06799						0.069	-0.16973
0.069083	0.038345						0.069083	-0.12324
0.069167	0.147986						0.069167	-0.09754
0.06925	0.187485						0.06925	-0.18309
0.069333	-0.58068						0.069333	-0.9659
0.069417	-0.56476						0.069417	-0.45118
0.0695	0.008068						0.0695	-0.51489
0.069583	-0.08376						0.069583	-0.59005
0.069667	-0.33751						0.069667	-0.94059
0.06975	-0.01591						0.06975	-0.94269
0.069833	-0.04813						0.069833	-0.84974
0.069917	0.115855						0.069917	-1.06182
0.07	0.217339						0.07	-0.60179
0.070083	0.180753						0.070083	-0.45283
0.070167	0.151958						0.070167	-0.01809
0.07025	0.085203						0.07025	0.153321
0.070333	0.052107						0.070333	0.295915
0.070417	0.043934						0.070417	0.277848
0.0705	-0.06158						0.0705	-0.07501
0.070583	0.184999						0.070583	-1.11302
0.070667	0.099304						0.070667	-1.4865
0.07075	0.184678						0.07075	-0.67103
0.070833	0.211634						0.070833	-0.54388
0.070917	0.081791						0.070917	-0.6229
0.071	0.120006						0.071	-0.58291
0.071083	-0.17737						0.071083	-1.11308
0.071167	-0.28876						0.071167	-1.46787
0.07125	0.126029						0.07125	-0.80335
0.071333	0.040438						0.071333	-0.16803
0.071417	-0.14754						0.071417	-0.27784
0.0715	-0.16646						0.0715	-1.10132
0.071583	0.072619						0.071583	-1.37455
0.071667	-0.47574						0.071667	-0.86821
0.07175	-0.06381						0.07175	-1.08261
0.071833	-0.10786						0.071833	-0.42393
0.071917	-0.03164						0.071917	-0.65953
0.072	-0.07915						0.072	-1.78322
0.072083	-0.55136						0.072083	-1.06594
0.072167	-0.38061						0.072167	-0.74981
0.07225	-0.43169						0.07225	-0.54754
0.072333	-0.27498						0.072333	-0.44346
0.072417	-0.43981						0.072417	-0.38755
0.0725	-0.20072						0.0725	-0.18817
0.072583	-0.09893						0.072583	-0.79026
0.072667	0.062025						0.072667	-1.06439
0.07275	0.003487						0.07275	-0.68947
0.072833	-0.35451						0.072833	-1.32759
0.072917	-0.41607						0.072917	-1.23157
0.073	-0.19527						0.073	-0.32596
0.073083	-0.11106						0.073083	0.012467
0.073167	-0.07387						0.073167	-0.10322
0.07325	-0.11755						0.07325	-0.62445
0.073333	-0.4879						0.073333	-0.44711
0.073417	-0.1537						0.073417	-0.64414
0.0735	-0.0643						0.0735	-0.43712
0.073583	0.019461						0.073583	0.077275
0.073667	-0.05157						0.073667	-0.14864
0.07375	-0.17781						0.07375	-0.14898
0.073833	-0.32115						0.073833	0.165155
0.073917	-0.478						0.073917	-0.01966
0.074	-0.28119						0.074	0.139052
0.074083	-0.17344						0.074083	-0.01493
0.074167	-1.07506						0.074167	0.207974
0.07425	-0.44919						0.07425	-0.0118
0.074333	-0.09761						0.074333	0.123897
0.074417	-0.1098						0.074417	0.24173
0.0745	-0.18586						0.0745	0.376061
0.074583	-0.23476						0.074583	0.607491
0.074667	-0.05677						0.074667	0.509755
0.07475	-0.04054						0.07475	-0.00261
0.074833	0.026707						0.074833	0.154717
0.074917	0.097865						0.074917	-0.15877
0.075	-0.46493						0.075	-0.26509
0.075083	-0.06708						0.075083	-0.53643
0.075167	0.044937						0.075167	-0.28221
0.07525	-0.2269						0.07525	-0.09258
0.075333	-0.11324						0.075333	-0.03746
0.075417	-0.76941						0.075417	0.085904
0.0755	-0.17109						0.0755	-0.10133
0.075583	-0.10467						0.075583	-0.106
0.075667	-0.51262						0.075667	-0.64693
0.07575	-0.15879						0.07575	-0.01445
0.075833	-0.09984						0.075833	0.336062
0.075917	-0.05835						0.075917	0.419737
0.076	-0.27281						0.076	0.31802
0.076083	-0.1887						0.076083	0.474889
0.076167	-0.71232						0.076167	0.627007
0.07625	-0.44092						0.07625	0.611205
0.076333	-0.18508						0.076333	0.470332
0.076417	-0.179						0.076417	0.502037
0.0765	-0.76868						0.0765	0.358701
0.076583	-0.35064						0.076583	-0.26702
0.076667	-0.21585						0.076667	-0.22692
0.07675	-0.15162						0.07675	-0.0673
0.076833	-0.46254						0.076833	-0.06968
0.076917	-0.28911						0.076917	-0.22679
0.077	-0.10665						0.077	0.130754
0.077083	-0.02235						0.077083	-0.19138
0.077167	-0.52842						0.077167	0.080302
0.07725	-0.06319						0.07725	0.042719
0.077333	-0.24002						0.077333	-0.27414
0.077417	-0.3593						0.077417	0.104883
0.0775	-0.09472						0.0775	0.561554
0.077583	-0.22223						0.077583	-0.39371
0.077667	-0.60225						0.077667	-0.26417
0.07775	-0.56525						0.07775	-0.03677
0.077833	-0.3059						0.077833	-0.21667
0.077917	-0.23206						0.077917	-0.46705
0.078	-0.39489						0.078	-0.98685
0.078083	-0.61999						0.078083	-1.26624
0.078167	-0.46183						0.078167	-0.97164
0.07825	-0.16257						0.07825	-0.80027
0.078333	-0.16455						0.078333	-0.27175
0.078417	-0.14853						0.078417	0.085211
0.0785	-0.33443						0.0785	0.073108
0.078583	-0.11102						0.078583	-0.83504
0.078667	0.08308						0.078667	-0.52506
0.07875	-0.68339						0.07875	-0.39536
0.078833	-0.59608						0.078833	-0.46597
0.078917	-0.25493						0.078917	-0.14054
0.079	-0.03979						0.079	-0.37671
0.079083	0.020845						0.079083	-0.08982
0.079167	0.004148						0.079167	-0.01941
0.07925	0.024747						0.07925	-0.0515
0.079333	-0.23494						0.079333	-0.02715
0.079417	-0.07137						0.079417	-0.07901
0.0795	-0.01867						0.0795	-1.15393
0.079583	-0.17301						0.079583	-0.6313
0.079667	-0.86933						0.079667	-0.40346
0.07975	-0.39948						0.07975	-1.03151
0.079833	-0.14056						0.079833	-0.46285
0.079917	-0.14189						0.079917	-0.42761
0.08	-0.19322						0.08	-0.2491
0.080083	-0.30105						0.080083	-0.23675
0.080167	-0.11403						0.080167	0.034091
0.08025	0.058738						0.08025	0.382584
0.080333	-0.31419						0.080333	0.400845
0.080417	-0.87161						0.080417	0.104061
0.0805	-0.39761						0.0805	-0.31864
0.080583	-0.32824						0.080583	-1.42841
0.080667	-0.37297						0.080667	-0.38174
0.08075	-0.62496						0.08075	-0.64854
0.080833	-0.18912						0.080833	-0.66967
0.080917	-0.08552						0.080917	-0.26175
0.081	-0.50013						0.081	-0.04297
0.081083	-0.6774						0.081083	-0.08337
0.081167	-0.2858						0.081167	-0.02999
0.08125	-0.21308						0.08125	-0.26335
0.081333	-0.91422						0.081333	-1.13207
0.081417	-0.52672						0.081417	-0.60336
0.0815	-0.14805						0.0815	-0.21005
0.081583	-0.16172						0.081583	-0.26779
0.081667	-0.30436						0.081667	-0.40672
0.08175	-0.44203						0.08175	-1.10618
0.081833	-0.41099						0.081833	-0.44416
0.081917	-0.15834						0.081917	0.02693
0.082	-0.4838						0.082	0.12791
0.082083	-0.21181						0.082083	-0.43893
0.082167	-0.23707						0.082167	-0.75994
0.08225	-0.18347						0.08225	-0.56825
0.082333	-0.21053						0.082333	-1.00739
0.082417	-0.4963						0.082417	-1.10753
0.0825	-0.9437						0.0825	-0.56085
0.082583	-0.21131						0.082583	-0.40106
0.082667	-0.76874						0.082667	-0.47227
0.08275	-0.16539						0.08275	-0.40373
0.082833	-0.21221						0.082833	-1.16984
0.082917	-0.14149						0.082917	-0.64951
0.083	-0.1893						0.083	-0.70251
0.083083	0.004347						0.083083	-0.36685
0.083167	0.24909						0.083167	-0.24769
0.08325	0.170031						0.08325	-0.68115
0.083333	0.136172						0.083333	-1.45268
0.083417	0.114748						0.083417	-0.68182
0.0835	0.164582						0.0835	-0.58281
0.083583	-0.03815						0.083583	-0.18284
0.083667	-0.50586						0.083667	0.05466
0.08375	-0.32053						0.08375	-0.0502
0.083833	-0.00329						0.083833	-0.93335
0.083917	-0.05892						0.083917	-0.5292
0.084	-0.042						0.084	-0.49326
0.084083	0.021273						0.084083	-0.24703
0.084167	0.309195						0.084167	0.052313
0.08425	0.168501						0.08425	-0.00558
0.084333	-0.14621						0.084333	-0.1021
0.084417	0.081843						0.084417	-0.1909
0.0845	0.140619						0.0845	-0.21643
0.084583	0.163238						0.084583	-0.20826
0.084667	0.234547						0.084667	-0.29444
0.08475	0.222947						0.08475	-0.38527
0.084833	0.035965						0.084833	-0.09132
0.084917	-0.03519						0.084917	0.090038
0.085	-0.28002						0.085	-0.00907
0.085083	-0.18977						0.085083	-0.19305
0.085167	-0.64946						0.085167	-0.05793
0.08525	-0.59705						0.08525	-0.51307
0.085333	-0.23466						0.085333	-0.08374
0.085417	-0.12029						0.085417	0.197413
0.0855	0.002326						0.0855	0.144274
0.085583	0.060715						0.085583	0.102877
0.085667	0.102397						0.085667	0.076775
0.08575	0.226283						0.08575	-0.35603
0.085833	0.266134						0.085833	-0.2768
0.085917	-0.15069						0.085917	-0.60461
0.086	-0.31845						0.086	-0.76464
0.086083	0.022985						0.086083	-0.57859
0.086167	0.158595						0.086167	-1.27188
0.08625	-0.78445						0.08625	-0.57859
0.086333	-0.30341						0.086333	-0.29601
0.086417	0.12566						0.086417	-0.1733
0.0865	-0.01714						0.0865	-0.14702
0.086583	-0.31505						0.086583	-1.0389
0.086667	-0.06769						0.086667	-0.67448
0.08675	0.065448						0.08675	-0.17678
0.086833	0.083003						0.086833	-0.18067
0.086917	-0.15536						0.086917	0.088094
0.087	0.16815						0.087	-0.11405
0.087083	0.244226						0.087083	0.022738
0.087167	0.198216						0.087167	0.142743
0.08725	-0.22809						0.08725	0.201391
0.087333	-0.23341						0.087333	-0.04041
0.087417	-0.17938						0.087417	-0.07715
0.0875	0.019851						0.0875	-0.14637
0.087583	0.15922						0.087583	-0.58831
0.087667	0.101467						0.087667	-0.02887
0.08775	0.064724						0.08775	0.254722
0.087833	-0.17133						0.087833	0.187278
0.087917	-0.0556						0.087917	0.216924
0.088	-0.18398						0.088	0.294093
0.088083	0.041895						0.088083	0.26081
0.088167	0.146343						0.088167	0.087461
0.08825	-0.06475						0.08825	-0.26533
0.088333	-0.39898						0.088333	-0.49216
0.088417	-0.08767						0.088417	-0.2048
0.0885	-0.22324						0.0885	-0.97712
0.088583	0.012585						0.088583	-1.90743
0.088667	-0.21979						0.088667	-0.89674
0.08875	0.028462						0.08875	-0.97373
0.088833	-0.07484						0.088833	-0.27701
0.088917	-0.3703						0.088917	-0.32636
0.089	-0.12474						0.089	-0.13039
0.089083	-0.00489						0.089083	-0.06152
0.089167	-0.03461						0.089167	-0.12977
0.08925	-0.1508						0.08925	0.117713
0.089333	-0.24642						0.089333	-0.1012
0.089417	-0.15681						0.089417	-0.32584
0.0895	0.045439						0.0895	-0.55166
0.089583	0.128865						0.089583	-1.45602
0.089667	0.194775						0.089667	-0.90861
0.08975	-0.01574						0.08975	-1.00061
0.089833	-0.34443						0.089833	-0.87534
0.089917	0.047357						0.089917	-0.30525
0.09	-0.14224						0.09	-0.33205
0.090083	-0.22313						0.090083	-0.41701
0.090167	-0.17017						0.090167	-0.67534
0.09025	0.069993						0.09025	-0.36093
0.090333	0.039608						0.090333	-0.84315
0.090417	0.09212						0.090417	-1.12086
0.0905	0.116494						0.0905	-0.63091
0.090583	0.08963						0.090583	0.071033
0.090667	0.10722						0.090667	0.057545
0.09075	0.099329						0.09075	-0.82789
0.090833	-0.38471						0.090833	-1.14899
0.090917	-0.10205						0.090917	-0.26441
0.091	0.157033						0.091	-0.12405
0.091083	0.056771						0.091083	-0.0428
0.091167	0.01766						0.091167	0.084071
0.09125	-0.10222						0.09125	-0.17743
0.091333	0.111462						0.091333	-0.00541
0.091417	0.186795						0.091417	0.162293
0.0915	0.204316						0.0915	0.114394
0.091583	0.148989						0.091583	-0.23488
0.091667	-0.78382						0.091667	0.093794
0.09175	-0.16943						0.09175	0.152632
0.091833	0.075024						0.091833	-0.0526
0.091917	-0.09196						0.091917	-0.19759
0.092	-0.2048						0.092	-0.19245
0.092083	-0.52663						0.092083	-0.25988
0.092167	-0.32722						0.092167	-0.23013
0.09225	-0.02694						0.09225	-0.39553
0.092333	-0.02241						0.092333	-0.03059
0.092417	0.040145						0.092417	-0.36141
0.0925	-0.62772						0.0925	-0.3696
0.092583	-0.38617						0.092583	-0.25761
0.092667	-0.12621						0.092667	-0.75175
0.09275	-0.22471						0.09275	-0.23218
0.092833	-0.03287						0.092833	0.048819
0.092917	-0.45476						0.092917	-0.23462
0.093	-0.34082						0.093	-0.02301
0.093083	-0.15417						0.093083	0.02754
0.093167	0.00992						0.093167	0.097523
0.09325	0.03083						0.09325	0.182025
0.093333	0.135786						0.093333	0.271184
0.093417	0.159766						0.093417	0.271159
0.0935	0.142252						0.0935	-1.06172
0.093583	-0.68211						0.093583	-0.71603
0.093667	-0.33866						0.093667	-0.45619
0.09375	-0.91424						0.09375	-0.33123
0.093833	-0.35069						0.093833	-0.1981
0.093917	-0.43793						0.093917	-0.57187
0.094	-1.01413						0.094	-0.73537
0.094083	-0.37414						0.094083	-0.46007
0.094167	-1.23742						0.094167	-0.36412
0.09425	-0.56872						0.09425	-0.35168
0.094333	-0.34725						0.094333	0.072734
0.094417	-0.80795						0.094417	0.102721
0.0945	-0.72461						0.0945	0.21929
0.094583	-0.4159						0.094583	0.179828
0.094667	-0.17048						0.094667	-0.18156
0.09475	-0.04089						0.09475	-0.50627
0.094833	-0.13224						0.094833	-0.78057
0.094917	-0.0723						0.094917	-0.23569
0.095	0.012524						0.095	-0.08234
0.095083	-0.36682						0.095083	-0.24774
0.095167	-0.34847						0.095167	-0.45725
0.09525	-0.0911						0.09525	-1.72453
0.095333	0.010576						0.095333	-0.834
0.095417	0.096581						0.095417	-0.13455
0.0955	-0.7319						0.0955	0.237937
0.095583	-1.11712						0.095583	0.365828
0.095667	-1.17522						0.095667	0.009378
0.09575	-0.57306						0.09575	-0.03281
0.095833	-0.12085						0.095833	-0.0809
0.095917	-0.03153						0.095917	0.189831
0.096	-0.59896						0.096	-0.22628
0.096083	-0.26235						0.096083	-0.44907
0.096167	0.013193						0.096167	-0.98359
0.09625	-0.21221						0.09625	-0.48614
0.096333	-0.60558						0.096333	-0.20064
0.096417	-0.22251						0.096417	-0.01205
0.0965	-0.02363						0.0965	0.135247
0.096583	0.04116						0.096583	-0.05592
0.096667	0.0428						0.096667	-0.52389
0.09675	0.078537						0.09675	-0.37249
0.096833	-0.12296						0.096833	-0.40472
0.096917	-0.25742						0.096917	-0.38061
0.097	-0.03008						0.097	-0.63068
0.097083	-0.11594						0.097083	-0.17994
0.097167	-0.15155						0.097167	0.020541
0.09725	-0.04274						0.09725	-0.26216
0.097333	-0.0172						0.097333	-0.2095
0.097417	-0.15312						0.097417	-0.12734
0.0975	-0.47199						0.0975	-0.96631
0.097583	-0.3868						0.097583	-0.36792
0.097667	-0.80544						0.097667	-0.19583
0.09775	-0.32656						0.09775	-0.53134
0.097833	-0.0986						0.097833	-0.13675
0.097917	0.049235						0.097917	-0.87933
0.098	0.049007						0.098	-0.95578
0.098083	0.066045						0.098083	-0.54192
0.098167	-0.27777						0.098167	-0.92019
0.09825	-0.1874						0.09825	-1.00882
0.098333	-0.05341						0.098333	-1.32543
0.098417	-0.29077						0.098417	-0.70698
0.0985	-0.37453						0.0985	-0.47912
0.098583	-0.35531						0.098583	-0.42011
0.098667	0.071386						0.098667	-0.44231
0.09875	0.164963						0.09875	-0.23229
0.098833	0.171095						0.098833	-0.15351
0.098917	0.162563						0.098917	-0.61478
0.099	-0.05738						0.099	-0.725
0.099083	-1.20296						0.099083	-0.46575
0.099167	-1.10949						0.099167	-0.86993
0.09925	-0.50775						0.09925	-0.37856
0.099333	-0.42432						0.099333	-0.05554
0.099417	-0.41418						0.099417	0.282128
0.0995	-0.15313						0.0995	0.011141
0.099583	-0.34864						0.099583	-0.6425
0.099667	0.033862						0.099667	-0.71773
0.09975	-0.65514						0.09975	-0.18064
0.099833	-0.65766						0.099833	-0.01009
0.099917	-0.28245						0.099917	0.047956
0.1	-0.10131						0.1	-0.24858
0.100083	-0.05083						0.100083	-0.24842
0.100167	-0.41794						0.100167	0.023636
0.10025	-0.32324						0.10025	-0.42026
0.100333	-0.49038						0.100333	-0.25292
0.100417	0.083236						0.100417	-0.01696
0.1005	-0.01387						0.1005	0.056356
0.100583	-0.18084						0.100583	-0.47943
0.100667	-0.00347						0.100667	-0.39676
0.10075	0.076677						0.10075	-0.55077
0.100833	0.081022						0.100833	-0.41377
0.100917	0.088456						0.100917	-0.55636
0.101	-0.16014						0.101	-0.7161
0.101083	0.04389						0.101083	-1.14281
0.101167	-0.47111						0.101167	-1.60174
0.10125	-0.45813						0.10125	-0.81353
0.101333	-0.25658						0.101333	-0.41728
0.101417	-0.2164						0.101417	-1.06784
0.1015	-0.29035						0.1015	-0.4432
0.101583	-0.20518						0.101583	-0.54793
0.101667	-0.47151						0.101667	-0.5481
0.10175	-0.21046						0.10175	-1.22279
0.101833	-0.07733						0.101833	-0.85323
0.101917	0.052507						0.101917	-0.37743
0.102	0.104733						0.102	-0.75286
0.102083	0.065274						0.102083	-0.62244
0.102167	0.097049						0.102167	-0.46987
0.10225	-0.03638						0.10225	-0.06711
0.102333	-0.03836						0.102333	0.025268
0.102417	0.045827						0.102417	-0.42186
0.1025	0.058376						0.1025	-0.28254
0.102583	0.023398						0.102583	0.118836
0.102667	0.033345						0.102667	-0.34526
0.10275	-0.00259						0.10275	-0.33992
0.102833	0.065147						0.102833	-0.28742
0.102917	-0.12596						0.102917	-0.53175
0.103	-0.01436						0.103	-0.38446
0.103083	-0.10771						0.103083	-0.45107
0.103167	-0.06845						0.103167	-0.01901
0.10325	-0.08551						0.10325	0.00387
0.103333	-0.47599						0.103333	-0.63466
0.103417	-0.44487						0.103417	-0.13119
0.1035	-0.3809						0.1035	-0.18868
0.103583	-0.40368						0.103583	-0.91263
0.103667	-1.15512						0.103667	-0.88607
0.10375	-1.11079						0.10375	-1.12309
0.103833	-1.49825						0.103833	-1.42114
0.103917	-0.55129						0.103917	-0.55288
0.104	-0.15603						0.104	-0.22117
0.104083	-0.23156						0.104083	-0.16128
0.104167	-0.01167						0.104167	-0.14574
0.10425	-0.09664						0.10425	0.088373
0.104333	-0.00282						0.104333	0.120663
0.104417	0.058902						0.104417	-0.09212
0.1045	-0.69559						0.1045	-0.02405
0.104583	-0.23067						0.104583	-0.36064
0.104667	-0.17542						0.104667	-0.33717
0.10475	-0.73014						0.10475	-0.15736
0.104833	-0.35235						0.104833	-0.13885
0.104917	-0.4209						0.104917	-0.12797
0.105	-0.20008						0.105	-0.42444
0.105083	-0.05937						0.105083	-0.48289
0.105167	-0.06873						0.105167	-0.66508
0.10525	-0.48117						0.10525	-0.1756
0.105333	-0.46094						0.105333	-0.03575
0.105417	-0.87974						0.105417	-0.05713
0.1055	-0.50772						0.1055	-0.027
0.105583	-0.12266						0.105583	0.034997
0.105667	-0.13228						0.105667	-0.50795
0.10575	-0.16393						0.10575	-0.84467
0.105833	-0.1677						0.105833	-0.67797
0.105917	0.018036						0.105917	-0.86018
0.106	-0.40158						0.106	-0.55374
0.106083	-0.16003						0.106083	-0.80035
0.106167	-0.03788						0.106167	-1.81538
0.10625	-0.12964						0.10625	-0.8546
0.106333	0.048468						0.106333	-0.498
0.106417	-0.1252						0.106417	-0.29984
0.1065	-0.38683						0.1065	-0.11425
0.106583	-0.13774						0.106583	-0.37903
0.106667	-0.41058						0.106667	-0.09054
0.10675	-0.44449						0.10675	-0.09225
0.106833	-0.27125						0.106833	-0.24862
0.106917	-0.12228						0.106917	-0.19865
0.107	-0.35374						0.107	-0.04607
0.107083	-0.09901						0.107083	-0.14547
0.107167	0.092773						0.107167	-0.10794
0.10725	-0.21119						0.10725	-0.08599
0.107333	-0.42621						0.107333	0.157578
0.107417	-0.2871						0.107417	0.044137
0.1075	-0.58198						0.1075	-0.46286
0.107583	-0.16968						0.107583	-0.04463
0.107667	-0.37772						0.107667	-0.12238
0.10775	-0.34592						0.10775	-0.56561
0.107833	-0.07042						0.107833	-0.05746
0.107917	-0.87289						0.107917	0.371014
0.108	-0.27794						0.108	0.494915
0.108083	-0.16649						0.108083	0.314505
0.108167	0.063826						0.108167	-0.0236
0.10825	0.135106						0.10825	0.309212
0.108333	-0.31486						0.108333	0.184254
0.108417	-0.08978						0.108417	-0.22361
0.1085	0.00984						0.1085	-0.51937
0.108583	-0.05469						0.108583	-0.27576
0.108667	-0.03549						0.108667	-0.36702
0.10875	-0.20477						0.10875	-0.39946
0.108833	0.067664						0.108833	-0.11406
0.108917	-0.1159						0.108917	-0.04221
0.109	-0.35054						0.109	-0.14564
0.109083	-0.22682						0.109083	-0.30879
0.109167	-0.10607						0.109167	-0.19637
0.10925	-0.24479						0.10925	-0.33023
0.109333	-0.08842						0.109333	-1.11954
0.109417	-1.1273						0.109417	-0.97818
0.1095	-0.49519						0.1095	-0.52623
0.109583	-0.65591						0.109583	-0.03371
0.109667	-0.31009						0.109667	0.216227
0.10975	-0.35314						0.10975	0.420404
0.109833	-1.03613						0.109833	0.466101
0.109917	-0.37217						0.109917	0.279006
0.11	-0.21687						0.11	0.365251
0.110083	-0.1349						0.110083	-0.21245
0.110167	-0.13765						0.110167	0.226391
0.11025	-0.12305						0.11025	-0.00637
0.110333	-0.19755						0.110333	-0.31092
0.110417	-0.30867						0.110417	-0.69315
0.1105	-0.27313						0.1105	-0.50913
0.110583	-0.29891						0.110583	-0.44047
0.110667	-0.2367						0.110667	-0.11072
0.11075	-0.10089						0.11075	-0.27186
0.110833	0.034495						0.110833	-0.50725
0.110917	0.08134						0.110917	-1.00261
0.111	-0.06433						0.111	-0.30365
0.111083	-0.12706						0.111083	-0.05822
0.111167	-0.40297						0.111167	-0.65888
0.11125	-0.29441						0.11125	-1.11536
0.111333	-0.12017						0.111333	-0.85131
0.111417	-0.0076						0.111417	-0.71121
0.1115	-0.09316						0.1115	-0.38809
0.111583	-0.23187						0.111583	-0.6575
0.111667	-0.12255						0.111667	-0.91961
0.11175	-0.39001						0.11175	-0.95804
0.111833	-0.49995						0.111833	-0.80886
0.111917	-0.40741						0.111917	-0.62098
0.112	-0.60238						0.112	-0.33369
0.112083	-0.59744						0.112083	-0.65401
0.112167	-0.50953						0.112167	-1.00564
0.11225	-1.14149						0.11225	-0.32508
0.112333	-1.13078						0.112333	-0.25451
0.112417	-0.6231						0.112417	0.000769
0.1125	-0.28705						0.1125	0.21917
0.112583	-0.25223						0.112583	-0.07016
0.112667	-0.22311						0.112667	-0.42637
0.11275	-0.65905						0.11275	-0.29045
0.112833	-0.48255						0.112833	-0.68881
0.112917	-0.26176						0.112917	-0.35426
0.113	-0.05007						0.113	0.079651
0.113083	-0.33425						0.113083	-0.07201
0.113167	-0.21516						0.113167	-0.35767
0.11325	-0.073						0.11325	-0.35661
0.113333	-0.14179						0.113333	-0.35685
0.113417	0.069911						0.113417	-0.18667
0.1135	0.106911						0.1135	-0.12831
0.113583	0.00214						0.113583	0.021717
0.113667	-0.11244						0.113667	-0.38165
0.11375	-0.07622						0.11375	-0.26437
0.113833	0.042748						0.113833	-0.78495
0.113917	0.166201						0.113917	-0.36969
0.114	0.095262						0.114	-0.37393
0.114083	-0.06325						0.114083	-0.01272
0.114167	-0.2526						0.114167	0.124831
0.11425	-0.07673						0.11425	0.139555
0.114333	0.003601						0.114333	0.117546
0.114417	-0.10158						0.114417	0.019745
0.1145	-0.98502						0.1145	-0.51326
0.114583	-0.29178						0.114583	-0.31032
0.114667	-0.10828						0.114667	-0.51879
0.11475	-0.13914						0.11475	-0.21229
0.114833	-0.16807						0.114833	-0.17006
0.114917	-0.06907						0.114917	-0.19086
0.115	0.04512						0.115	-0.68694
0.115083	-0.04125						0.115083	-0.48845
0.115167	0.027293						0.115167	-0.27634
0.11525	-0.19254						0.11525	-0.20946
0.115333	-0.39263						0.115333	-0.19047
0.115417	-0.13589						0.115417	-0.28601
0.1155	0.015812						0.1155	-0.00782
0.115583	0.139968						0.115583	-0.42665
0.115667	0.129076						0.115667	-0.13978
0.11575	0.079698						0.11575	-0.38444
0.115833	-0.067						0.115833	-0.30276
0.115917	-0.00517						0.115917	-1.96286
0.116	0.035938						0.116	-1.61641
0.116083	0.117457						0.116083	-0.80373
0.116167	-0.08984						0.116167	-0.15555
0.11625	0.194948						0.11625	-0.23686
0.116333	0.236544						0.116333	-0.20843
0.116417	0.014928						0.116417	-0.52803
0.1165	0.01035						0.1165	-0.3125
0.116583	0.169238						0.116583	-0.15879
0.116667	-0.32486						0.116667	-0.5607
0.11675	-0.58878						0.11675	-0.47416
0.116833	-0.19368						0.116833	-0.37077
0.116917	-0.0421						0.116917	-1.03242
0.117	0.003863						0.117	-0.59514
0.117083	0.080709						0.117083	-0.32748
0.117167	0.054995						0.117167	-0.23784
0.11725	-0.29305						0.11725	-0.10548
0.117333	-0.01652						0.117333	-0.48131
0.117417	-0.1591						0.117417	-0.88954
0.1175	-0.05308						0.1175	-0.39052
0.117583	-0.0536						0.117583	-0.71882
0.117667	-0.11004						0.117667	-1.19014
0.11775	-0.29113						0.11775	-0.46667
0.117833	-0.04351						0.117833	-0.03977
0.117917	0.004831						0.117917	-0.29374
0.118	-0.52527						0.118	-0.57663
0.118083	-0.40992						0.118083	-0.37816
0.118167	-0.0452						0.118167	-0.28816
0.11825	-0.56125						0.11825	-0.95731
0.118333	-0.45972						0.118333	-0.58916
0.118417	-0.29444						0.118417	-0.47952
0.1185	-0.22914						0.1185	-0.10594
0.118583	-0.0181						0.118583	-0.04665
0.118667	-0.05179						0.118667	0.161734
0.11875	-0.97921						0.11875	-0.11156
0.118833	-0.27501						0.118833	0.144538
0.118917	-0.33216						0.118917	0.335651
0.119	-0.16814						0.119	0.359071
0.119083	-0.04249						0.119083	0.273815
0.119167	-0.09734						0.119167	0.293912
0.11925	-0.14191						0.11925	-0.4455
0.119333	-0.0544						0.119333	-0.47593
0.119417	-0.07352						0.119417	-0.43814
0.1195	-0.25801						0.1195	-0.08981
0.119583	-0.1402						0.119583	-0.30875
0.119667	-0.13634						0.119667	0.004873
0.11975	-0.00548						0.11975	-0.11711
0.119833	0.013815						0.119833	0.104689
0.119917	-0.12278						0.119917	0.06192
0.12	-0.00343						0.12	0.019921
0.120083	0.062509						0.120083	-0.1518
0.120167	-0.03497						0.120167	-0.26341
0.12025	0.080267						0.12025	-0.06246
0.120333	-0.58074						0.120333	-0.09601
0.120417	-0.37494						0.120417	-0.13074
0.1205	-0.35709						0.1205	0.01442
0.120583	-0.06266						0.120583	-0.06953
0.120667	-0.01602						0.120667	0.320194
0.12075	-0.02416						0.12075	0.082493
0.120833	-0.19791						0.120833	-0.36939
0.120917	-0.10624						0.120917	-0.96541
0.121	-1.04473						0.121	-0.36821
0.121083	-0.87414						0.121083	0.101639
0.121167	-0.16245						0.121167	0.233254
0.12125	-0.03451						0.12125	0.192433
0.121333	-0.07956						0.121333	-0.09131
0.121417	-0.08734						0.121417	-0.61262
0.1215	-0.63006						0.1215	-0.2184
0.121583	-0.20233						0.121583	-0.12246
0.121667	-0.08711						0.121667	-0.95231
0.12175	0.004486						0.12175	-0.28449
0.121833	0.130128						0.121833	-0.20651
0.121917	0.074105						0.121917	-0.3984
0.122	-0.42949						0.122	-0.36683
0.122083	-0.61802						0.122083	-0.40505
0.122167	-0.16307						0.122167	-0.18357
0.12225	0.003443						0.12225	-0.2505
0.122333	-0.11667						0.122333	-0.52702
0.122417	0.098916						0.122417	-0.26831
0.1225	0.128912						0.1225	0.140494
0.122583	0.009502						0.122583	0.356256
0.122667	0.002606						0.122667	0.158955
0.12275	0.023499						0.12275	-0.34218
0.122833	-0.04425						0.122833	-0.10857
0.122917	0.041153						0.122917	-0.44554
0.123	0.070248						0.123	-0.97605
0.123083	-0.11999						0.123083	-0.67677
0.123167	0.033458						0.123167	-0.40199
0.12325	-0.01905						0.12325	-0.18914
0.123333	-0.02945						0.123333	-0.16133
0.123417	-0.6108						0.123417	-1.17581
0.1235	-1.51284						0.1235	-0.69649
0.123583	-0.74112						0.123583	-1.42146
0.123667	-0.18427						0.123667	-0.63064
0.12375	-0.62135						0.12375	-0.5734
0.123833	-0.63929						0.123833	-0.25761
0.123917	-0.26049						0.123917	-0.53131
0.124	-0.24882						0.124	-0.70997
0.124083	-0.32031						0.124083	-0.23167
0.124167	-0.0677						0.124167	-0.12804
0.12425	-0.13291						0.12425	0.012805
0.124333	-0.05704						0.124333	0.00692
0.124417	-0.62616						0.124417	-0.04417
0.1245	-0.3522						0.1245	-0.29232
0.124583	-0.08571						0.124583	-0.26545
0.124667	0.086699						0.124667	-0.0715
0.12475	0.113207						0.12475	-0.16696
0.124833	-0.00612						0.124833	0.176743
0.124917	-0.10104						0.124917	-0.11117
0.125	-0.01839						0.125	-0.03282
0.125083	-0.01073						0.125083	0.166124
0.125167	-0.01337						0.125167	-0.02273
0.12525	-0.29063						0.12525	-0.61317
0.125333	-0.04263						0.125333	0.049813
0.125417	0.046611						0.125417	0.148415
0.1255	-0.11048						0.1255	-0.34749
0.125583	-0.10368						0.125583	-0.17888
0.125667	-0.0808						0.125667	0.070008
0.12575	-0.05505						0.12575	0.034244
0.125833	-0.12827						0.125833	-0.39534
0.125917	-0.85419						0.125917	-0.10867
0.126	-0.19428						0.126	-0.014
0.126083	-0.00819						0.126083	-0.2806
0.126167	-0.06429						0.126167	-0.31726
0.12625	-0.12832						0.12625	-0.65908
0.126333	-0.04717						0.126333	-0.3756
0.126417	-0.08122						0.126417	-0.09972
0.1265	-0.24793						0.1265	0.193389
0.126583	-0.18785						0.126583	0.252187
0.126667	-0.09753						0.126667	-0.03859
0.12675	-0.02198						0.12675	0.107757
0.126833	0.00894						0.126833	0.22574
0.126917	0.08248						0.126917	-0.16685
0.127	0.037657						0.127	-0.17345
0.127083	-0.11786						0.127083	0.031982
0.127167	-0.43336						0.127167	-0.13757
0.12725	-0.68227						0.12725	-0.03382
0.127333	-0.83154						0.127333	-0.13554
0.127417	-0.23768						0.127417	-0.09188
0.1275	0.134624						0.1275	-0.08936
0.127583	0.17629						0.127583	-0.22962
0.127667	0.17266						0.127667	-0.03933
0.12775	0.16521						0.12775	-0.02687
0.127833	0.196925						0.127833	-0.1649
0.127917	0.252155						0.127917	-0.16517
0.128	0.268082						0.128	-0.28141
0.128083	0.114295						0.128083	-0.11702
0.128167	0.074287						0.128167	-0.09916
0.12825	0.0858						0.12825	-0.09973
0.128333	-0.18273						0.128333	0.070064
0.128417	-0.33395						0.128417	-0.473
0.1285	-0.02584						0.1285	-1.21912
0.128583	-0.01853						0.128583	-0.41077
0.128667	0.013245						0.128667	-0.14591
0.12875	0.012884						0.12875	-0.60075
0.128833	-0.11377						0.128833	-1.38281
0.128917	0.027298						0.128917	-0.82168
0.129	0.116522						0.129	-1.11563
0.129083	-0.33265						0.129083	-0.47891
0.129167	-0.10933						0.129167	-0.00075
0.12925	-0.86768						0.12925	-0.02501
0.129333	-0.19504						0.129333	-0.3805
0.129417	-0.97715						0.129417	-0.24461
0.1295	-0.63771						0.1295	0.142469
0.129583	-0.17778						0.129583	0.026
0.129667	0.095963						0.129667	0.020759
0.12975	0.215078						0.12975	-0.22512
0.129833	-0.10664						0.129833	-0.1719
0.129917	-1.17127						0.129917	-0.07067
0.13	-0.44046						0.13	-0.0937
0.130083	-0.13316						0.130083	-0.38457
0.130167	0.051564						0.130167	-0.61179
0.13025	0.125764						0.13025	-0.22694
0.130333	-0.31193						0.130333	-0.23787
0.130417	-0.51637						0.130417	-1.34517
0.1305	-0.38206						0.1305	-1.30247
0.130583	-0.65652						0.130583	-0.56963
0.130667	-0.00061						0.130667	-0.17971
0.13075	0.099493						0.13075	-0.07954
0.130833	0.141452						0.130833	-0.33891
0.130917	0.165051						0.130917	-0.99434
0.131	0.24162						0.131	-0.73515
0.131083	0.281503						0.131083	-0.27338
0.131167	0.18406						0.131167	-0.02656
0.13125	0.183692						0.13125	-0.21496
0.131333	0.052036						0.131333	-0.13953
0.131417	0.076708						0.131417	-0.04613
0.1315	0.164133						0.1315	-0.77111
0.131583	0.302972						0.131583	-1.05573
0.131667	0.154506						0.131667	-0.73589
0.13175	0.098461						0.13175	-0.13786
0.131833	0.244072						0.131833	0.08416
0.131917	0.205629						0.131917	-0.66236
0.132	0.16695						0.132	-0.68386
0.132083	0.061128						0.132083	-0.8141
0.132167	0.229509						0.132167	-2.80947
0.13225	0.276372						0.13225	-1.75875
0.132333	0.262978						0.132333	-1.34258
0.132417	0.19881						0.132417	-0.82058
0.1325	0.293394						0.1325	-0.53113
0.132583	0.153822						0.132583	-0.72831
0.132667	0.131841						0.132667	-0.44901
0.13275	-0.24998						0.13275	-0.49451
0.132833	-0.126						0.132833	-0.73431
0.132917	-1.80289						0.132917	-0.55165
0.133	-0.84966						0.133	-0.92257
0.133083	-0.25912						0.133083	-0.49066
0.133167	0.015063						0.133167	-0.46521
0.13325	0.169956						0.13325	-0.94575
0.133333	-0.29397						0.133333	-0.66326
0.133417	-0.37664						0.133417	-0.28438
0.1335	0.041583						0.1335	-0.40798
0.133583	0.037353						0.133583	-0.24402
0.133667	0.195837						0.133667	-0.51773
0.13375	0.226537						0.13375	-0.72336
0.133833	-0.09263						0.133833	-0.69648
0.133917	0.028336						0.133917	-0.67159
0.134	0.044126						0.134	-0.48091
0.134083	-0.46661						0.134083	-0.22522
0.134167	-0.02524						0.134167	0.022992
0.13425	-0.23081						0.13425	-0.02544
0.134333	-0.13685						0.134333	0.167459
0.134417	0.003721						0.134417	-0.05409
0.1345	0.073732						0.1345	-0.87664
0.134583	-0.14686						0.134583	-0.43606
0.134667	0.275071						0.134667	0.032983
0.13475	0.235278						0.13475	0.065775
0.134833	0.13166						0.134833	-0.02105
0.134917	-0.116						0.134917	-0.32803
0.135	-0.17639						0.135	-0.51986
0.135083	-0.11985						0.135083	-0.61046
0.135167	-0.51115						0.135167	-0.27252
0.13525	-0.50793						0.13525	-0.46248
0.135333	-0.26349						0.135333	-1.16112
0.135417	-0.30209						0.135417	-0.89134
0.1355	-0.29174						0.1355	-0.50206
0.135583	-0.35519						0.135583	-0.69002
0.135667	-0.57378						0.135667	-0.88607
0.13575	-0.13189						0.13575	-0.45006
0.135833	0.083232						0.135833	0.019506
0.135917	0.121554						0.135917	0.175118
0.136	0.150316						0.136	0.062741
0.136083	0.091159						0.136083	0.075457
0.136167	0.059617						0.136167	-0.12222
0.13625	0.057387						0.13625	-0.0377
0.136333	0.170193						0.136333	-0.1086
0.136417	0.189277						0.136417	-0.00036
0.1365	-0.03588						0.1365	0.121025
0.136583	0.079396						0.136583	-1.1845
0.136667	-0.09866						0.136667	-0.79886
0.13675	-0.11245						0.13675	-0.55735
0.136833	-0.20571						0.136833	-0.45611
0.136917	0.028459						0.136917	-0.368
0.137	0.095866						0.137	-0.57719
0.137083	-0.06161						0.137083	-0.31401
0.137167	-0.34773						0.137167	0.065665
0.13725	-0.17256						0.13725	-0.29527
0.137333	0.123959						0.137333	-0.41763
0.137417	0.212602						0.137417	-0.27403
0.1375	0.015547						0.1375	0.108169
0.137583	-0.21427						0.137583	0.05071
0.137667	-0.0622						0.137667	-0.01043
0.13775	-0.99046						0.13775	-0.23226
0.137833	-0.62033						0.137833	-0.47827
0.137917	-0.62081						0.137917	-1.26406
0.138	-0.24629						0.138	-0.4664
0.138083	-0.0477						0.138083	-0.32812
0.138167	-0.30552						0.138167	-0.39317
0.13825	-0.80742						0.13825	-0.98034
0.138333	-0.16299						0.138333	-0.40444
0.138417	-0.32464						0.138417	-0.06251
0.1385	-0.22423						0.1385	0.215664
0.138583	-0.58761						0.138583	0.052607
0.138667	-0.47903						0.138667	-0.58726
0.13875	-0.38367						0.13875	-0.43254
0.138833	-0.1037						0.138833	-0.33811
0.138917	-0.43586						0.138917	-0.03592
0.139	-0.07287						0.139	0.168003
0.139083	0.026005						0.139083	0.050895
0.139167	-0.19662						0.139167	-0.50184
0.13925	-0.21618						0.13925	-0.75901
0.139333	0.068097						0.139333	-0.09135
0.139417	0.06989						0.139417	0.075134
0.1395	0.183899						0.1395	0.058169
0.139583	-0.02386						0.139583	0.117275
0.139667	0.008164						0.139667	-0.00516
0.13975	0.088552						0.13975	-0.2087
0.139833	-0.08048						0.139833	-0.19644
0.139917	-0.11836						0.139917	-0.66063
0.14	0.007082						0.14	-1.06863
0.140083	-0.02476						0.140083	-0.44644
0.140167	0.043002						0.140167	-0.25688
0.14025	-0.06091						0.14025	-0.02607
0.140333	-0.60378						0.140333	-0.43511
0.140417	-0.28856						0.140417	-0.46857
0.1405	-0.01287						0.1405	-0.19757
0.140583	-0.03717						0.140583	-0.64719
0.140667	-0.52781						0.140667	-0.26756
0.14075	-0.28708						0.14075	-0.12267
0.140833	-0.35175						0.140833	-0.16613
0.140917	-0.63782						0.140917	-1.05317
0.141	-0.33043						0.141	-0.60939
0.141083	-0.10096						0.141083	-1.32095
0.141167	0.03601						0.141167	-0.60574
0.14125	-0.13034						0.14125	-0.28224
0.141333	-1.61227						0.141333	-0.0429
0.141417	-1.01979						0.141417	-0.06049
0.1415	-0.61668						0.1415	-0.01893
0.141583	-0.26841						0.141583	-0.57132
0.141667	-1.0045						0.141667	-0.49833
0.14175	-0.45414						0.14175	-0.26324
0.141833	-0.24853						0.141833	-0.71609
0.141917	-0.10849						0.141917	-0.58922
0.142	-0.25293						0.142	-0.64772
0.142083	-0.09088						0.142083	-0.6072
0.142167	-0.60718						0.142167	-0.33379
0.14225	-0.3413						0.14225	-0.3019
0.142333	-0.16554						0.142333	-0.24165
0.142417	-0.29531						0.142417	0.049403
0.1425	-0.23655						0.1425	-0.28892
0.142583	-0.14514						0.142583	-0.30284
0.142667	-0.13963						0.142667	-0.13053
0.14275	-0.37293						0.14275	-0.53076
0.142833	-0.06847						0.142833	-0.51192
0.142917	0.042133						0.142917	-0.16502
0.143	0.011204						0.143	-0.1048
0.143083	-0.07372						0.143083	-0.00172
0.143167	-0.03689						0.143167	0.015803
0.14325	-0.00281						0.14325	0.082139
0.143333	-0.33089						0.143333	-0.02039
0.143417	-0.67657						0.143417	-0.69031
0.1435	-0.41131						0.1435	-0.43215
0.143583	-0.28204						0.143583	-0.21329
0.143667	-0.37982						0.143667	-0.27938
0.14375	-0.62205						0.14375	-0.31965
0.143833	-0.3538						0.143833	-0.08102
0.143917	-0.26898						0.143917	0.299808
0.144	-0.08328						0.144	0.235405
0.144083	0.014082						0.144083	-0.0046
0.144167	-0.14973						0.144167	-0.20733
0.14425	-0.10997						0.14425	-0.14787
0.144333	-0.05044						0.144333	-0.20306
0.144417	-0.099						0.144417	-0.17205
0.1445	-0.31552						0.1445	-0.22525
0.144583	-0.20979						0.144583	0.099751
0.144667	-0.04436						0.144667	-0.50389
0.14475	-0.02969						0.14475	-0.58278
0.144833	0.025037						0.144833	-0.2871
0.144917	0.07208						0.144917	-0.14594
0.145	-0.18856						0.145	0.177637
0.145083	-0.43395						0.145083	-0.06375
0.145167	-0.53083						0.145167	0.120476
0.14525	-0.32531						0.14525	0.441384
0.145333	-0.32599						0.145333	0.040359
0.145417	-0.21688						0.145417	-0.66196
0.1455	-0.15468						0.1455	-0.63479
0.145583	-0.17246						0.145583	-1.56954
0.145667	-0.23449						0.145667	-0.75094
0.14575	-0.07689						0.14575	-0.55314
0.145833	-0.08808						0.145833	-0.21982
0.145917	-0.2548						0.145917	-0.34156
0.146	-0.45032						0.146	-0.75893
0.146083	-0.81297						0.146083	-1.18877
0.146167	-0.22992						0.146167	-0.47236
0.14625	-0.13349						0.14625	-0.23044
0.146333	-0.11546						0.146333	-0.43714
0.146417	-0.06251						0.146417	-0.18424
0.1465	0.013242						0.1465	-0.65846
0.146583	-0.00018						0.146583	-0.32598
0.146667	-0.10175						0.146667	-0.16917
0.14675	-0.20716						0.14675	-0.17843
0.146833	-0.33364						0.146833	-0.33311
0.146917	-0.73612						0.146917	-1.47976
0.147	-0.48799						0.147	-2.04154
0.147083	-0.6692						0.147083	-1.39714
0.147167	-0.32585						0.147167	-1.33972
0.14725	-0.21098						0.14725	-0.82931
0.147333	-0.0868						0.147333	-1.63737
0.147417	-0.07718						0.147417	-1.14642
0.1475	-0.19934						0.1475	-0.39844
0.147583	-0.02239						0.147583	-0.33127
0.147667	-0.0538						0.147667	-0.80086
0.14775	-0.06448						0.14775	-0.28385
0.147833	0.086183						0.147833	0.066215
0.147917	-0.07772						0.147917	-0.15408
0.148	-0.31325						0.148	-0.43819
0.148083	-0.32563						0.148083	-0.26791
0.148167	-0.18352						0.148167	-0.13998
0.14825	-0.19272						0.14825	-0.04518
0.148333	-0.13698						0.148333	-0.56088
0.148417	-0.34856						0.148417	-0.7316
0.1485	-0.28285						0.1485	-0.38067
0.148583	-0.31087						0.148583	0.124612
0.148667	-0.05161						0.148667	0.066133
0.14875	-0.03608						0.14875	-0.00323
0.148833	-0.02915						0.148833	-0.1208
0.148917	-0.0044						0.148917	-0.11444
0.149	0.005566						0.149	-0.85576
0.149083	0.098022						0.149083	-0.83453
0.149167	0.006625						0.149167	-0.07874
0.14925	0.00543						0.14925	0.277096
0.149333	0.032501						0.149333	0.310328
0.149417	0.053903						0.149417	0.268557
0.1495	-0.02142						0.1495	-0.46489
0.149583	0.037123						0.149583	-1.44234
0.149667	-0.14947						0.149667	-1.13865
0.14975	-0.36352						0.14975	-0.57817
0.149833	-0.41255						0.149833	-0.54633
0.149917	-0.74168						0.149917	-0.33357
0.15	-0.06716						0.15	-0.4337
0.150083	0.029637						0.150083	-0.80488
0.150167	-0.00414						0.150167	-0.55551
0.15025	0.070123						0.15025	-0.40853
0.150333	-0.25169						0.150333	-0.41413
0.150417	-0.55603						0.150417	-0.27902
0.1505	-0.14577						0.1505	-0.29906
0.150583	-0.08959						0.150583	-0.17177
0.150667	0.042881						0.150667	-0.0018
0.15075	-0.08894						0.15075	-0.09652
0.150833	-0.46927						0.150833	-0.44925
0.150917	-0.26444						0.150917	-0.43038
0.151	0.056857						0.151	-0.0825
0.151083	0.124111						0.151083	0.042349
0.151167	-0.27314						0.151167	0.283812
0.15125	0.018431						0.15125	0.207328
0.151333	0.140101						0.151333	0.200151
0.151417	-0.20939						0.151417	0.017563
0.1515	0.122749						0.1515	0.067473
0.151583	0.08197						0.151583	0.215169
0.151667	-0.04379						0.151667	-0.00791
0.15175	-0.22569						0.15175	-0.28512
0.151833	0.195395						0.151833	0.062386
0.151917	0.165531						0.151917	0.039865
0.152	-0.03494						0.152	-0.82461
0.152083	0.023717						0.152083	-0.25766
0.152167	-0.02386						0.152167	-0.2477
0.15225	0.078509						0.15225	-0.30198
0.152333	0.026626						0.152333	-0.06895
0.152417	-0.77627						0.152417	0.070548
0.1525	-0.6188						0.1525	0.066056
0.152583	-0.35664						0.152583	-1.04627
0.152667	-0.02376						0.152667	-0.70577
0.15275	0.20775						0.15275	-0.78336
0.152833	0.296361						0.152833	-0.84059
0.152917	-0.05635						0.152917	-0.38468
0.153	-0.25046						0.153	-0.07664
0.153083	-0.06674						0.153083	-0.58242
0.153167	-0.34046						0.153167	-0.04454
0.15325	0.073063						0.15325	0.30535
0.153333	-0.09859						0.153333	0.31463
0.153417	-0.00831						0.153417	0.118655
0.1535	-0.04612						0.1535	-0.15857
0.153583	-0.13987						0.153583	0.005374
0.153667	0.036694						0.153667	-0.20902
0.15375	0.089457						0.15375	0.026211
0.153833	0.105097						0.153833	-0.33851
0.153917	0.15753						0.153917	-0.21566
0.154	0.171334						0.154	-0.4129
0.154083	0.187289						0.154083	-0.18336
0.154167	-0.67387						0.154167	0.025254
0.15425	-0.45445						0.15425	-0.12945
0.154333	-0.3823						0.154333	0.19904
0.154417	-0.50944						0.154417	0.106344
0.1545	-0.804						0.1545	0.388337
0.154583	-0.46672						0.154583	0.200471
0.154667	-0.27119						0.154667	-1.33887
0.15475	-0.03753						0.15475	-1.10542
0.154833	0.184712						0.154833	-1.12751
0.154917	0.112059						0.154917	-0.76541
0.155	0.104871						0.155	-0.34363
0.155083	-0.07667						0.155083	0.003021
0.155167	-0.05877						0.155167	0.078395
0.15525	-0.09792						0.15525	-0.11497
0.155333	-0.14008						0.155333	-0.27277
0.155417	-0.02178						0.155417	-0.92054
0.1555	-0.10504						0.1555	-0.18479
0.155583	0.059165						0.155583	0.131504
0.155667	0.093844						0.155667	0.311323
0.15575	-0.07376						0.15575	-0.16876
0.155833	-0.26996						0.155833	-0.10333
0.155917	-0.65649						0.155917	-0.03101
0.156	-0.48326						0.156	0.027143
0.156083	-0.04631						0.156083	0.089828
0.156167	-0.10936						0.156167	-0.07758
0.15625	-0.67709						0.15625	-0.08991
0.156333	-0.9537						0.156333	0.02728
0.156417	-0.35559						0.156417	-1.12317
0.1565	-0.02496						0.1565	-1.31619
0.156583	0.013553						0.156583	-1.0428
0.156667	-0.00091						0.156667	-1.647
0.15675	-0.01846						0.15675	-0.78457
0.156833	0.105801						0.156833	0.011549
0.156917	-0.33452						0.156917	-0.12623
0.157	-0.17987						0.157	-0.26749
0.157083	0.01746						0.157083	-1.24342
0.157167	0.166491						0.157167	-0.81143
0.15725	0.036688						0.15725	-0.23125
0.157333	-0.22689						0.157333	-0.35191
0.157417	-0.07217						0.157417	-0.57768
0.1575	-0.02009						0.1575	-0.25798
0.157583	0.117567						0.157583	-0.24599
0.157667	0.101296						0.157667	-0.1509
0.15775	-0.09389						0.15775	-0.29261
0.157833	-0.12745						0.157833	-1.71884
0.157917	-0.05499						0.157917	-1.20398
0.158	0.004717						0.158	-0.49314
0.158083	0.015677						0.158083	-0.11219
0.158167	0.129497						0.158167	-0.3964
0.15825	0.103036						0.15825	-0.19501
0.158333	-0.11619						0.158333	-0.0357
0.158417	0.015106						0.158417	-0.39227
0.1585	0.006836						0.1585	-0.29761
0.158583	0.074703						0.158583	-1.06965
0.158667	0.018176						0.158667	-0.95659
0.15875	-0.15081						0.15875	-0.94974
0.158833	0.024962						0.158833	-0.97468
0.158917	0.017824						0.158917	-1.16677
0.159	-0.03846						0.159	-0.71976
0.159083	-0.3252						0.159083	-0.20974
0.159167	0.007262						0.159167	-0.35644
0.15925	0.044338						0.15925	-0.32698
0.159333	0.063722						0.159333	-0.26661
0.159417	-0.03169						0.159417	-1.00474
0.1595	0.077236						0.1595	-0.60781
0.159583	0.10461						0.159583	-0.44663
0.159667	0.106517						0.159667	-0.26368
0.15975	-0.05687						0.15975	-0.21891
0.159833	-0.51682						0.159833	-0.3271
0.159917	-0.55954						0.159917	0.046934
0.16	-0.93155						0.16	-0.39145
0.160083	-0.95075						0.160083	-0.99194
0.160167	-0.68676						0.160167	-0.89299
0.16025	-0.20767						0.16025	-0.53562
0.160333	0.01738						0.160333	-0.26509
0.160417	0.070823						0.160417	-0.41947
0.1605	0.109156						0.1605	-0.5734
0.160583	-0.07476						0.160583	-0.50596
0.160667	-0.18909						0.160667	-0.93857
0.16075	-0.10959						0.16075	-1.11225
0.160833	-0.2176						0.160833	-0.32136
0.160917	-0.14204						0.160917	-0.07009
0.161	0.088606						0.161	0.012658
0.161083	0.110611						0.161083	0.30007
0.161167	0.038429						0.161167	0.519082
0.16125	0.156007						0.16125	0.050144
0.161333	0.21186						0.161333	-0.04042
0.161417	-0.11785						0.161417	-0.50318
0.1615	-0.21183						0.1615	-0.8223
0.161583	-1.05312						0.161583	-1.04444
0.161667	-0.28827						0.161667	-0.29348
0.16175	-0.16196						0.16175	0.0249
0.161833	0.040931						0.161833	0.0683
0.161917	-0.24183						0.161917	0.067948
0.162	-0.12035						0.162	-0.01461
0.162083	-0.16012						0.162083	-0.67978
0.162167	-0.05825						0.162167	-1.09599
0.16225	-0.32124						0.16225	-0.66
0.162333	-0.10584						0.162333	-0.13843
0.162417	-0.04123						0.162417	-0.00406
0.1625	0.000996						0.1625	0.09753
0.162583	-0.04007						0.162583	0.299388
0.162667	0.089185						0.162667	0.343083
0.16275	-0.07652						0.16275	0.208123
0.162833	-0.09254						0.162833	-0.47541
0.162917	-0.54232						0.162917	0.006748
0.163	-0.29231						0.163	0.025602
0.163083	-0.18336						0.163083	-0.18119
0.163167	-0.74474						0.163167	-0.25862
0.16325	-0.33059						0.16325	-0.26797
0.163333	-1.06797						0.163333	-0.69717
0.163417	-0.60458						0.163417	-2.02045
0.1635	-0.50471						0.1635	-2.19674
0.163583	-0.12363						0.163583	-0.75197
0.163667	0.094387						0.163667	-0.51786
0.16375	-0.0976						0.16375	-1.71702
0.163833	-0.26067						0.163833	-1.06397
0.163917	-0.18729						0.163917	-0.50057
0.164	-0.56847						0.164	-0.42029
0.164083	-0.93525						0.164083	-0.57176
0.164167	-0.36752						0.164167	-1.06638
0.16425	-0.28775						0.16425	-1.14686
0.164333	-0.60735						0.164333	-1.3832
0.164417	-0.48977						0.164417	-0.58001
0.1645	-0.43527						0.1645	0.05891
0.164583	-0.64417						0.164583	0.10836
0.164667	-0.59895						0.164667	0.120294
0.16475	-0.67834						0.16475	0.084491
0.164833	-0.51921						0.164833	-0.20104
0.164917	-0.23785						0.164917	-1.0205
0.165	-0.31452						0.165	-0.88516
0.165083	-0.65396						0.165083	-0.52159
0.165167	-0.66752						0.165167	-0.10982
0.16525	-0.59134						0.16525	0.1281
0.165333	-0.32852						0.165333	0.10414
0.165417	-0.22416						0.165417	0.084071
0.1655	-0.16358						0.1655	-0.13359
0.165583	-0.23635						0.165583	-0.65167
0.165667	-0.2763						0.165667	-0.79644
0.16575	-0.99028						0.16575	-0.47332
0.165833	-0.93836						0.165833	-0.52103
0.165917	-0.59366						0.165917	-0.29686
0.166	-0.47508						0.166	-0.24585
0.166083	-0.27917						0.166083	-0.2297
0.166167	-0.50906						0.166167	-0.15328
0.16625	-0.80329						0.16625	-0.00841
0.166333	-0.41628						0.166333	-0.31534
0.166417	-0.29322						0.166417	-0.17367
[truncated: 59,003 more rows]

## Sheet: Fig.8b
Column graph (left)					Column graph (right)
5 µM APP17	5 µM Baclofen	5 µM APP17 + 5 µM Baclofen			5 µM sc-APP17	5 µM Baclofen	5 µM sc-APP17 + 5 µM Baclofen
-0.234322	6.2181	5.03371			-0.877888	10.6137	7.98292
0.156776	7.49531	6.68169			0.0261788	5.06231	4.70179
-1.05543	13.5142	13.5185			-0.263681	4.60744	5.26231
-0.420902	13.9758	13.5986			1.02276	9.20541	10.4911
-0.069132	8.17054	6.57376			-0.44496	14.86	13.4609
