# Supplementary material for: Soluble amyloid-β precursor peptide does not regulate GABAB receptor activity
Source: eLife. 2023 Jan 23;12:e82082. doi: 10.7554/eLife.82082 (PMC9917443; doi:10.7554/eLife.82082)
Supplement: Figure 9—source data 1. [file elife-82082-fig9-data1.xlsx]

## Sheet: Fig.9a
Traces mEPSCs
Time (s)	baseline	0.25 µM APP17	30 µM baclofen
0.0001	-2.25605	-0.07547	-2.33401
0.0002	-2.25605	0.53489	-2.02884
0.0003	-2.8664	0.84008	-0.80814
0.0004	-3.17158	0.8401	-0.50296
0.0005	-3.17158	-0.68577	-0.19778
0.0006	-2.86641	0.22977	0.10739
0.0007	-1.6457	1.14531	-0.80814
0.0008	-2.56123	1.14532	-0.80814
0.0009	-3.17158	0.53499	-0.50296
0.001	-3.17159	-0.6857	-1.11331
0.0011	-2.56123	-0.38052	-0.50296
0.0012	-0.73018	-0.3805	0.71774
0.0013	0.18535	-0.38049	0.71774
0.0014	-0.11983	-0.99083	1.93845
0.0015	-1.34054	-0.68564	1.32809
0.0016	-1.64571	0.84025	0.71774
0.0017	-3.47677	0.53509	0.41257
0.0018	-2.56124	-1.60113	-0.19778
0.0019	-1.95089	-3.12699	1.02292
0.002	-1.34054	-1.90627	1.32809
0.0021	-0.73019	-1.60109	1.02292
0.0022	-0.11984	-0.68555	0.10739
0.0023	1.40604	-1.60106	-0.80814
0.0024	-0.11984	-2.2114	-1.11331
0.0025	0.49051	-0.68551	-0.50296
0.0026	-0.42502	0.53521	-0.50296
0.0027	-1.64572	2.0611	0.10739
0.0028	-1.34055	1.45076	1.32809
0.0029	-1.34055	0.23007	0.10739
0.003	-1.64573	-1.60097	0.10739
0.0031	-2.25608	-2.51648	-0.50296
0.0032	-2.25608	-2.82164	-1.11331
0.0033	-2.86643	-2.82163	0.10739
0.0034	-2.56126	-2.21127	0.71774
0.0035	-1.95091	-1.6009	1.93845
0.0036	-1.64573	-0.68536	2.24362
0.0037	-0.42503	-0.99052	2.5488
0.0038	-1.64573	-0.68533	1.93845
0.0039	-2.25608	-0.9905	2.24362
0.004	-2.56126	-0.38013	1.63327
0.0041	-2.25609	-0.07494	1.32809
0.0042	-1.95091	-0.3801	1.02292
0.0043	-1.34056	0.23026	1.32809
0.0044	-1.95091	-0.38008	2.5488
0.0045	-2.86644	0.84064	1.32809
0.0046	-3.47679	1.14583	1.02292
0.0047	-3.4768	1.75619	0.41257
0.0048	-0.73021	2.06138	0.10739
0.0049	0.18531	2.36657	0.41257
0.005	1.40601	2.36658	1.02292
0.0051	2.32154	2.06142	1.63327
0.0052	2.32154	1.75626	1.02292
0.0053	2.01636	-0.37996	1.02292
0.0054	-0.11987	0.84076	0.71774
0.0055	-0.42504	0.84077	1.32809
0.0056	-1.34057	-0.37992	1.63327
0.0057	-0.73022	-0.07473	1.63327
0.0058	-0.11987	-1.90577	2.5488
0.0059	1.40601	-0.68506	2.85397
0.006	1.10083	-0.37987	4.07468
0.0061	0.79565	-0.68503	3.15915
0.0062	0.79565	-0.99019	2.24362
0.0063	0.1853	-0.37983	0.41257
0.0064	1.71118	-0.07464	-0.50296
0.0065	1.406	-0.3798	0.41257
0.0066	0.79565	0.53574	1.32809
0.0067	0.49047	0.84093	1.63327
0.0068	-0.42506	1.45129	1.63327
0.0069	-0.42506	0.84096	1.63327
0.007	-0.73023	0.84097	-0.19778
0.0071	-0.42506	-0.37972	-0.19778
0.0072	-0.42506	-0.99006	-0.80814
0.0073	0.49047	-0.99005	-1.72366
0.0074	0.49046	-1.60038	-1.41849
0.0075	-0.11989	0.84104	-0.80814
0.0076	-1.34059	1.14622	1.32809
0.0077	-1.34059	-0.68482	1.93845
0.0078	-0.73024	-2.82103	1.32809
0.0079	0.18528	-2.21067	0.41257
0.008	1.40599	-0.07443	-0.50296
0.0081	-0.42507	1.14629	-1.72366
0.0082	-1.64577	1.45148	-1.41849
0.0083	-0.42507	0.23079	-0.50296
0.0084	0.49046	0.53598	-0.50296
0.0085	0.79563	-0.98989	0.71774
0.0086	-0.1199	-1.60023	-0.19778
0.0087	-1.03543	-2.21056	0.10739
0.0088	-2.25613	-3.43125	-0.19778
0.0089	-1.3406	-3.12606	-1.41849
0.009	-1.95096	-2.82088	-1.72366
0.0091	-1.64578	-1.60016	-2.63919
0.0092	-1.03543	-0.68462	-2.63919
0.0093	0.18527	-0.37943	-2.02884
0.0094	1.40597	-1.60012	-1.72366
0.0095	0.79562	-1.60011	-2.33401
0.0096	1.40597	-1.90527	-1.41849
0.0097	1.1008	-2.21043	0.10739
0.0098	0.79562	-0.68454	0.71774
0.0099	-0.42509	-1.60005	0.41257
0.01	-1.64579	-0.98969	-0.80814
0.0101	-1.03544	-1.9052	-0.50296
0.0102	-0.11991	-2.51554	-0.50296
0.0103	-0.73026	-2.21035	0.41257
0.0104	-1.03544	-2.82069	-0.19778
0.0105	-1.03544	-1.90515	-1.72366
0.0106	-1.95097	-0.37926	-2.02884
0.0107	-0.42509	0.53628	-2.33401
0.0108	1.71114	0.5363	-2.63919
0.0109	1.10078	0.84149	-2.94437
0.011	0.18526	0.8415	-2.02884
0.0111	-0.73027	1.45186	-2.33401
0.0112	-0.11992	0.84152	-2.02884
0.0113	-0.73027	-0.68434	-1.41849
0.0114	-1.6458	-0.68433	-1.72366
0.0115	-1.6458	-0.07396	-1.72366
0.0116	-1.6458	0.5364	-2.02884
0.0117	-1.03545	-0.68429	-0.80814
0.0118	0.18525	-0.98945	-1.11331
0.0119	1.71113	-0.37909	-2.33401
0.012	0.49042	-0.37907	-2.33401
0.0121	-0.11993	-1.29459	-2.33401
0.0122	-0.73028	-2.2101	-1.72366
0.0123	-0.73028	-2.51526	-0.80814
0.0124	0.18524	-3.43078	0.41257
0.0125	0.79559	-3.43076	-0.80814
0.0126	1.71112	-3.73593	-1.11331
0.0127	0.18524	-3.12556	-0.80814
0.0128	0.49042	-2.21002	-0.19778
0.0129	-0.42511	-1.59966	-0.19778
0.013	-0.11994	-1.29447	-1.11331
0.0131	-0.42511	-2.51516	0.10739
0.0132	0.18524	-1.29444	0.10739
0.0133	0.49041	-0.98925	1.02292
0.0134	0.49041	-0.68406	1.32809
0.0135	0.49041	-0.98923	1.02292
0.0136	0.18523	-1.59956	0.71774
0.0137	1.40593	-2.51508	-0.50296
0.0138	0.18523	-2.20989	-1.41849
0.0139	0.18523	-2.20988	-1.11331
0.014	0.18523	-3.43057	-0.19778
0.0141	-1.03548	-2.51503	-0.19778
0.0142	-1.34065	-1.90466	0.71774
0.0143	-0.42513	-0.37877	1.32809
0.0144	0.79558	0.2316	0.71774
0.0145	0.79558	-1.90462	-0.50296
0.0146	0.4904	-1.29426	-1.72366
0.0147	0.4904	-0.68389	-1.11331
0.0148	0.79557	-0.68388	-0.50296
0.0149	1.10075	-1.90457	0.41257
0.015	1.40592	-3.12526	0.41257
0.0151	2.62662	-3.43042	0.41257
0.0152	2.32145	-1.59935	0.10739
0.0153	2.62662	-0.37864	-0.50296
0.0154	0.79557	0.23173	-0.50296
0.0155	-1.03549	1.14727	0.41257
0.0156	-1.95102	-0.3786	1.63327
0.0157	-1.64584	-0.68376	0.10739
0.0158	-0.73032	-1.90445	0.41257
0.0159	0.18521	-1.90444	-0.50296
0.016	0.49039	-0.68372	-1.11331
0.0161	0.18521	-0.07335	-1.72366
0.0162	0.49038	-0.37852	-2.33401
0.0163	0.49038	-2.51473	-1.11331
0.0164	1.10073	-3.73542	-1.72366
0.0165	1.40591	-4.65094	-1.72366
0.0166	1.10073	-3.12505	-1.72366
0.0167	2.93179	-1.59915	-0.80814
0.0168	1.71108	-0.68361	0.10739
0.0169	0.79555	-0.6836	1.02292
0.017	-0.11997	-1.29394	0.10739
0.0171	-1.0355	-0.98875	-0.50296
0.0172	-0.42515	-2.81979	0.10739
0.0173	-0.11998	-2.20943	-0.80814
0.0174	-0.11998	-1.59906	-0.19778
0.0175	-1.03551	-2.2094	0.41257
0.0176	-0.11998	-1.29386	-0.19778
0.0177	-0.42516	-2.20937	0.41257
0.0178	-0.11998	-3.12489	0.71774
0.0179	-1.34069	-3.12487	1.63327
0.018	-2.25621	-3.12486	1.93845
0.0181	-1.64586	-3.7352	1.93845
0.0182	0.18519	-3.12483	0.71774
0.0183	2.6266	-3.43	1.02292
0.0184	2.93177	-3.73516	2.24362
0.0185	3.23694	-3.73515	2.24362
0.0186	2.62659	-3.42996	1.63327
0.0187	2.01624	-2.51442	1.32809
0.0188	1.71106	-3.73511	1.32809
0.0189	1.10071	-4.04027	-0.80814
0.019	0.79553	-4.04026	-0.50296
0.0191	1.71106	-4.34542	0.41257
0.0192	1.71106	-4.04023	0.71774
0.0193	0.18518	-3.42986	1.02292
0.0194	0.79553	-2.51432	1.32809
0.0195	0.79553	-3.12466	1.02292
0.0196	0.49035	-2.5143	0.71774
0.0197	0.49035	-3.42981	1.63327
0.0198	-0.42518	-3.4298	0.71774
0.0199	-0.42518	-3.73496	0.10739
0.02	-1.03553	-3.73495	-1.41849
0.0201	-0.12	-3.42976	-2.33401
0.0202	1.1007	-3.42975	-1.41849
0.0203	1.71105	-2.20903	-1.41849
0.0204	1.40587	-1.90384	0.71774
0.0205	1.40587	-1.59865	0.10739
0.0206	0.79552	-0.68311	0.41257
0.0207	0.49034	-1.59862	0.71774
0.0208	1.71105	-2.51414	-0.50296
0.0209	1.71104	-1.90377	-0.50296
0.021	2.32139	-1.59858	-0.50296
0.0211	1.71104	-0.68304	0.71774
0.0212	0.79551	0.53767	0.41257
0.0213	2.62657	-0.98819	0.10739
0.0214	2.32139	-1.59853	-1.11331
0.0215	2.93174	-2.20887	-1.72366
0.0216	3.23692	-2.51403	-1.72366
0.0217	2.93174	-2.20884	-1.11331
0.0218	2.01621	-3.12436	0.10739
0.0219	1.40586	-2.51399	0.41257
0.022	2.01621	-2.51398	1.63327
0.0221	2.01621	-2.51397	1.63327
0.0222	2.32138	-2.20878	0.71774
0.0223	2.32138	-2.51394	0.41257
0.0224	2.62656	-2.8191	0.10739
0.0225	1.10068	-2.51391	0.41257
0.0226	0.18515	-1.2932	0.41257
0.0227	0.18515	-0.98801	0.71774
0.0228	-1.34073	-0.37764	0.71774
0.0229	-1.95108	-1.29316	2.5488
0.023	-3.17179	-1.59832	1.32809
0.0231	-2.86661	-0.98796	0.71774
0.0232	-2.86661	-1.29312	-0.19778
0.0233	-1.34074	-0.98793	-0.50296
0.0234	-0.73039	-0.98792	0.71774
0.0235	0.49032	-1.90343	1.32809
0.0236	0.79549	-2.20859	2.85397
0.0237	1.71102	-2.81893	2.24362
0.0238	2.32137	-4.03962	1.32809
0.0239	2.62654	-4.34478	0.71774
0.024	4.15242	-3.42924	1.63327
0.0241	3.84725	-0.98782	1.93845
0.0242	5.37312	0.23289	2.24362
0.0243	5.06795	0.53808	3.15915
0.0244	3.54207	0.5381	2.5488
0.0245	2.32136	-1.29295	1.93845
0.0246	1.40583	-4.64987	0.41257
0.0247	0.18513	-8.61714	0.71774
0.0248	-0.12005	-12.5844	2.85397
0.0249	1.10066	-14.7206	2.5488
0.025	1.10065	-16.5517	3.15915
0.0251	1.71101	-18.3827	4.07468
0.0252	1.10065	-21.1293	4.68503
0.0253	-0.12005	-22.6551	3.7695
0.0254	-1.03558	-24.7914	2.24362
0.0255	-1.03558	-24.7914	0.10739
0.0256	1.40583	-24.181	-0.50296
0.0257	2.32135	-23.5706	0.10739
0.0258	3.54205	-23.5706	-0.19778
0.0259	3.84723	-24.1809	1.02292
0.026	3.54205	-22.3499	0.71774
0.0261	1.40582	-22.3499	0.41257
0.0262	0.18512	-21.7395	-0.19778
0.0263	0.18512	-20.2136	-0.80814
0.0264	1.10064	-20.5188	-0.80814
0.0265	3.54205	-21.1291	-1.11331
0.0266	2.93169	-21.1291	-0.80814
0.0267	3.54205	-22.0446	-0.19778
0.0268	2.93169	-22.655	-0.50296
0.0269	1.40581	-21.1291	0.10739
0.027	1.40581	-21.7394	0.71774
0.0271	0.79546	-22.3497	0.71774
0.0272	1.71099	-21.7394	1.32809
0.0273	1.40581	-21.7394	1.32809
0.0274	1.10063	-20.8238	-0.19778
0.0275	1.40581	-19.6031	-0.19778
0.0276	1.71098	-18.3824	-0.19778
0.0277	1.71098	-19.2979	1.02292
0.0278	3.23686	-19.2979	1.93845
0.0279	3.23686	-18.0772	0.71774
0.028	2.01615	-18.0772	-0.50296
0.0281	2.62651	-18.0771	-1.41849
0.0282	2.32133	-18.0771	-1.41849
0.0283	2.32133	-18.0771	-2.02884
0.0284	3.23685	-18.3823	-1.41849
0.0285	2.6265	-16.5512	-1.11331
0.0286	2.32132	-15.6357	0.41257
0.0287	2.01615	-14.415	0.10739
0.0288	2.6265	-15.0253	0.10739
0.0289	2.32132	-16.5512	1.02292
0.029	2.01615	-15.6356	1.32809
0.0291	1.71097	-13.8045	2.24362
0.0292	2.32132	-11.6683	0.71774
0.0293	3.23685	-10.7528	-0.19778
0.0294	3.8472	-10.4476	0.41257
0.0295	3.54202	-11.6683	0.71774
0.0296	3.23684	-11.6683	-0.19778
0.0297	4.45755	-12.5838	-0.80814
0.0298	3.84719	-12.2786	-0.19778
0.0299	3.54202	-11.0579	0.41257
0.03	4.76272	-11.9734	1.63327
0.0301	4.76272	-11.6682	0.10739
0.0302	5.06789	-11.9733	0.41257
0.0303	5.37307	-10.4475	-0.50296
0.0304	5.67824	-9.22674	-1.41849
0.0305	4.76271	-9.22672	-0.80814
0.0306	3.54201	-8.92153	-1.72366
0.0307	2.32131	-10.4474	-0.80814
0.0308	2.01613	-11.0577	-0.50296
0.0309	2.62648	-12.5836	0.10739
0.031	3.23683	-12.5836	-0.19778
0.0311	3.23683	-11.9732	-0.19778
0.0312	2.01613	-10.4473	-1.11331
0.0313	2.3213	-9.53179	-0.50296
0.0314	2.3213	-9.83695	-0.50296
0.0315	3.23683	-8.92141	-0.19778
0.0316	5.06788	-9.83693	1.32809
0.0317	4.7627	-9.53174	0.71774
0.0318	3.542	-9.22655	1.32809
0.0319	2.93165	-8.61619	1.32809
0.032	3.84717	-8.00582	0.10739
0.0321	3.23682	-8.92133	0.71774
0.0322	4.15235	-8.92132	0.71774
0.0323	3.84717	-8.61613	0.71774
0.0324	5.06787	-7.09024	1.32809
0.0325	4.7627	-7.70058	1.93845
0.0326	3.23682	-8.61609	1.63327
0.0327	3.23681	-9.53161	2.85397
0.0328	2.93164	-9.22642	2.24362
0.0329	3.84716	-8.31088	2.5488
0.033	5.06787	-7.39534	2.5488
0.0331	5.06787	-5.86944	1.93845
0.0332	4.76269	-5.25908	2.85397
0.0333	3.54198	-4.03836	1.63327
0.0334	2.93163	-4.03835	1.32809
0.0335	1.71093	-3.42798	1.02292
0.0336	2.32128	-3.73315	1.32809
0.0337	2.32128	-5.25901	2.5488
0.0338	4.15233	-5.56418	3.15915
0.0339	3.84716	-5.86934	2.24362
0.034	3.54198	-4.64862	1.02292
0.0341	3.2368	-4.64861	1.63327
0.0342	2.62645	-3.42789	1.32809
0.0343	3.2368	-3.73305	1.93845
0.0344	2.62645	-4.03822	2.5488
0.0345	3.2368	-3.73303	3.15915
0.0346	3.2368	-4.03819	4.07468
0.0347	2.93162	-3.12265	2.85397
0.0348	3.54197	-3.42781	2.24362
0.0349	3.84715	-3.12262	1.63327
0.035	3.84715	-4.03814	0.41257
0.0351	3.23679	-5.25883	-1.11331
0.0352	3.54197	-5.56399	-1.11331
0.0353	2.32126	-5.56398	0.41257
0.0354	2.32126	-4.95361	1.63327
0.0355	2.01609	-4.03807	1.63327
0.0356	3.84714	-2.51218	1.32809
0.0357	5.67819	-3.73287	2.24362
0.0358	5.37302	-3.1225	1.63327
0.0359	5.37302	-4.03802	1.93845
0.036	4.76266	-4.64836	2.5488
0.0361	4.15231	-4.03799	2.24362
0.0362	3.84713	-4.64833	2.24362
0.0363	2.32125	-3.42761	1.63327
0.0364	1.7109	-3.12243	1.63327
0.0365	1.40573	-2.81724	-0.19778
0.0366	1.40572	-3.42757	-0.80814
0.0367	1.40572	-3.42756	-1.11331
0.0368	2.9316	-3.73272	-1.41849
0.0369	2.32125	-3.42754	-1.11331
0.037	2.62642	-4.03787	-0.50296
0.0371	2.9316	-3.73268	0.10739
0.0372	3.84712	-3.4275	-0.19778
0.0373	4.76265	-3.73266	0.71774
0.0374	4.45747	-2.51194	-0.80814
0.0375	4.76265	-2.8171	-0.50296
0.0376	3.84712	-3.42744	0.10739
0.0377	3.84712	-3.42743	-0.50296
0.0378	3.54194	-4.03777	1.32809
0.0379	2.62642	-3.4274	1.32809
0.038	2.32124	-3.42739	1.02292
0.0381	2.62641	-2.20667	-0.19778
0.0382	2.62641	-0.98596	-0.19778
0.0383	1.40571	-0.37559	-0.80814
0.0384	1.40571	-1.59628	-0.50296
0.0385	-0.73052	-2.81697	0.10739
0.0386	0.185	-3.12213	0.41257
0.0387	1.4057	-3.4273	1.32809
0.0388	1.4057	-2.51176	-0.50296
0.0389	1.71088	-3.42727	-1.11331
0.039	1.10053	-3.73243	-2.33401
0.0391	0.79535	-2.51172	-2.94437
0.0392	1.4057	-0.68065	-1.72366
0.0393	2.6264	1.15042	-1.41849
0.0394	2.01605	1.76078	-0.50296
0.0395	0.49017	1.15045	0.71774
0.0396	0.49017	-1.29095	1.63327
0.0397	2.01605	-1.90129	0.71774
0.0398	2.32122	-4.0375	1.02292
0.0399	2.32122	-4.64784	1.02292
0.04	2.93157	-4.953	0.71774
0.0401	0.79534	-4.34264	0.10739
0.0402	1.40569	-3.12192	-0.50296
0.0403	2.01604	-4.03744	0.41257
0.0404	2.01604	-3.42707	0.10739
0.0405	2.62639	-4.34259	0.71774
0.0406	2.93157	-3.42705	1.02292
0.0407	2.01604	-1.90115	0.71774
0.0408	1.71086	-1.90114	0.71774
0.0409	2.01604	-1.59595	0.41257
0.041	0.18498	-1.90111	0.41257
0.0411	-0.42537	-1.9011	1.63327
0.0412	-1.3409	-1.90109	2.5488
0.0413	-1.03573	-1.29072	1.02292
0.0414	0.79533	-1.90106	-0.19778
0.0415	1.71085	-0.98552	-1.41849
0.0416	4.45744	-0.68033	-1.11331
0.0417	3.84708	-0.37514	0.71774
0.0418	2.93156	-0.06995	1.32809
0.0419	2.01603	-1.90099	3.46432
0.042	2.01603	-1.90098	3.15915
0.0421	2.3212	-2.8165	2.5488
0.0422	2.93155	-3.42683	1.63327
0.0423	2.62637	-2.81647	0.71774
0.0424	2.62637	-3.12163	1.02292
0.0425	2.93155	-3.42679	0.10739
0.0426	2.3212	-3.1216	-0.50296
0.0427	2.01602	-2.81642	0.10739
0.0428	0.79532	-2.8164	1.93845
0.0429	0.18496	-1.29051	1.02292
0.043	0.18496	-0.37497	1.63327
0.0431	-0.42539	0.84575	0.71774
0.0432	0.18496	0.23541	-0.50296
0.0433	1.40566	-0.68011	0.71774
0.0434	2.62636	-0.98527	-0.19778
0.0435	4.45742	-2.20596	0.71774
0.0436	4.45742	-1.59559	0.71774
0.0437	4.15224	-1.2904	1.32809
0.0438	3.84706	-1.29039	1.93845
0.0439	3.84706	-1.29038	1.02292
0.044	4.15224	-0.68001	-0.19778
0.0441	4.76259	-1.29035	-1.11331
0.0442	3.54188	-0.37481	-1.11331
0.0443	2.93153	0.54073	0.10739
0.0444	2.93153	-0.67996	1.32809
0.0445	2.32118	-0.37477	-0.19778
0.0446	2.62635	-2.81616	-0.50296
0.0447	2.62635	-4.34203	-0.19778
0.0448	3.54188	-3.73167	-0.80814
0.0449	2.93153	-3.42648	-0.50296
0.045	1.71082	-2.20576	-1.41849
0.0451	1.10047	-1.90057	-1.11331
0.0452	1.10047	-0.98503	-1.41849
0.0453	2.016	-0.98502	-0.80814
0.0454	1.40564	-0.37465	-1.41849
0.0455	1.10047	-0.67981	-1.11331
0.0456	0.18494	-0.37463	-0.80814
0.0457	1.40564	0.23574	-0.80814
0.0458	1.10046	-0.06942	-0.80814
0.0459	1.40564	-0.06941	-1.72366
0.046	2.93152	-1.90045	-1.41849
0.0461	2.93152	-0.98491	-2.63919
0.0462	3.84704	-1.59525	-1.72366
0.0463	3.23669	-1.90041	-1.41849
0.0464	3.23669	-0.98487	-1.72366
0.0465	3.23669	-1.59521	-2.33401
0.0466	2.93151	-2.20555	-3.24954
0.0467	2.62633	-3.12106	-2.33401
0.0468	2.32116	-3.12105	-1.72366
0.0469	0.79528	-4.03656	-2.02884
0.047	0.4901	-4.6469	-2.63919
0.0471	0.4901	-5.56242	-2.02884
0.0472	-0.42543	-5.86758	-1.41849
0.0473	0.18492	-5.56239	-1.72366
0.0474	0.4901	-5.2572	-0.19778
0.0475	1.10045	-3.42613	-0.19778
0.0476	2.62633	-2.51059	1.63327
0.0477	3.23668	-1.90023	0.71774
0.0478	2.32115	-2.51057	-0.80814
0.0479	2.62632	-3.1209	-1.11331
0.048	3.84703	-3.42607	-0.50296
0.0481	3.84702	-4.34158	-0.50296
0.0482	3.54185	-4.34157	-0.50296
0.0483	2.01597	-4.03638	-0.19778
0.0484	1.10044	-3.42601	-1.11331
0.0485	0.18491	-3.12082	-0.50296
0.0486	0.49009	-1.90011	-0.19778
0.0487	1.10044	-1.90009	0.41257
0.0488	-0.12027	-0.98455	0.71774
0.0489	1.40561	-0.06901	-0.50296
0.049	2.62631	-0.37418	0.71774
0.0491	2.93149	0.84654	1.63327
0.0492	3.84701	-0.67933	2.24362
0.0493	3.84701	-0.98449	1.02292
0.0494	3.54184	-2.51035	0.10739
0.0495	2.32113	-2.81552	0.10739
0.0496	1.71078	-1.5948	0.41257
0.0497	1.10043	-0.67926	1.02292
0.0498	1.10043	-0.06889	1.32809
0.0499	0.49007	-0.06888	1.93845
0.05	0.49007	-0.67922	1.32809
0.0501	1.4056	-1.59473	1.93845
0.0502	2.6263	-1.8999	2.24362
0.0503	3.23665	-2.51023	1.93845
0.0504	1.71077	-1.89987	1.63327
0.0505	2.01595	-1.59468	0.41257
0.0506	1.71077	-1.28949	1.32809
0.0507	1.40559	-0.9843	0.71774
0.0508	1.40559	-2.51017	0.41257
0.0509	1.71077	-2.81533	1.02292
0.051	1.71077	-1.89979	2.24362
0.0511	2.32112	-0.06872	2.24362
0.0512	3.54182	0.84682	1.32809
0.0513	2.93147	0.54166	-0.19778
0.0514	2.93147	-0.06868	-1.41849
0.0515	3.84699	-0.37385	-1.11331
0.0516	4.15217	0.23652	-1.41849
0.0517	3.84699	-1.59452	0.71774
0.0518	2.93146	-1.89968	1.02292
0.0519	3.23664	-0.98414	1.63327
0.052	1.71076	-0.37378	2.24362
0.0521	0.49005	1.45729	1.32809
0.0522	-0.42547	2.06765	1.02292
0.0523	-0.1203	2.06767	1.32809
0.0524	-0.1203	0.84698	1.93845
0.0525	-0.42548	-0.06854	1.93845
0.0526	-0.73065	-0.3737	1.02292
0.0527	-0.42548	0.54184	0.10739
0.0528	0.49005	0.84703	0.71774
0.0529	0.18487	1.45739	0.71774
0.053	0.79522	2.06776	0.71774
0.0531	-0.12031	0.54189	2.24362
0.0532	-0.73066	0.23673	2.24362
0.0533	1.40557	-0.98396	2.5488
0.0534	0.49004	-0.67877	1.93845
0.0535	0.79522	0.23677	1.32809
0.0536	0.49004	0.23678	1.02292
0.0537	0.79522	1.15232	0.41257
0.0538	1.71074	-0.06836	0.71774
0.0539	1.71074	0.23682	2.5488
0.054	1.40556	-0.06834	3.7695
0.0541	2.32109	0.8472	2.24362
0.0542	1.40556	1.76274	2.24362
0.0543	1.10039	1.76276	1.93845
0.0544	1.71074	0.84724	2.24362
0.0545	0.49003	0.2369	1.02292
0.0546	1.10038	0.84727	0.41257
0.0547	2.32109	0.54211	1.32809
0.0548	2.62626	2.068	0.71774
0.0549	3.84696	0.54213	0.41257
0.055	3.23661	0.23697	0.10739
0.0551	2.93143	-0.37337	0.71774
0.0552	2.32108	-0.67853	2.24362
0.0553	2.32108	-0.06817	2.24362
0.0554	2.0159	-0.37333	1.63327
0.0555	1.10037	-0.98367	1.93845
0.0556	1.10037	-0.06813	2.85397
0.0557	1.71072	0.54224	1.93845
0.0558	2.32107	-0.0681	2.85397
0.0559	1.40555	-0.06809	2.24362
0.056	1.71072	-0.9836	0.71774
0.0561	1.10037	-0.98359	0.71774
0.0562	0.79519	1.15266	0.41257
0.0563	1.40554	0.84749	0.71774
0.0564	1.71072	1.45786	0.10739
0.0565	0.79519	0.54234	0.41257
0.0566	-0.42551	0.54236	-0.19778
0.0567	1.10036	0.54237	-1.11331
0.0568	2.32107	-0.67832	-1.41849
0.0569	2.62624	-1.28866	-1.72366
0.057	2.01589	-0.98347	-1.11331
0.0571	1.40554	0.8476	-0.19778
0.0572	-0.42552	1.76314	1.02292
0.0573	-1.64622	2.67868	-0.50296
0.0574	-1.03587	2.06834	-1.72366
0.0575	-0.42552	1.15283	-2.33401
0.0576	1.40553	-0.06786	-3.24954
0.0577	1.40553	-0.98338	-2.63919
0.0578	2.01588	-0.06784	-1.41849
0.0579	4.15211	0.23735	-0.50296
0.058	3.84693	1.15289	-0.50296
0.0581	2.93141	0.54256	-1.11331
0.0582	1.7107	-1.28849	-3.24954
0.0583	1.10035	-0.9833	-2.33401
0.0584	0.79517	-0.67811	-0.50296
0.0585	2.32105	-0.67809	0.10739
0.0586	2.9314	-0.37291	-1.11331
0.0587	3.23658	0.54263	-1.72366
0.0588	2.9314	-0.37288	-1.41849
0.0589	3.54175	0.23749	-2.33401
0.059	4.45728	-0.37285	-1.41849
0.0591	3.23657	-0.98319	-1.11331
0.0592	3.84692	0.23753	-0.80814
0.0593	3.23657	1.15307	-0.19778
0.0594	3.23657	2.06861	-0.80814
0.0595	3.84692	1.15309	-0.80814
0.0596	2.62622	-0.0676	-0.80814
0.0597	1.71069	-1.89864	-0.80814
0.0598	2.62621	-1.89863	-2.63919
0.0599	2.93139	-1.28826	-3.24954
0.06	2.01586	0.54281	-3.85989
0.0601	2.93139	0.23764	-4.47025
0.0602	2.32103	-0.06752	-4.16507
0.0603	0.79515	-0.37268	-4.47025
0.0604	-0.42555	-1.59337	-2.94437
0.0605	-0.42555	-0.37265	-2.94437
0.0606	2.01586	0.23771	-2.33401
0.0607	2.62621	-0.37263	-0.80814
0.0608	4.15208	-0.06744	-0.19778
0.0609	2.93138	-0.67778	0.41257
0.061	1.71068	-0.37259	0.41257
0.0611	1.4055	-1.59328	0.71774
0.0612	1.10032	-0.98291	0.71774
0.0613	0.48997	-0.67772	0.41257
0.0614	1.10032	-0.37253	-0.80814
0.0615	3.54173	-0.06735	-0.50296
0.0616	3.23655	1.45855	-1.72366
0.0617	2.32102	1.76374	-2.33401
0.0618	1.40549	0.84822	-1.11331
0.0619	1.71067	-0.06729	-0.80814
0.062	2.62619	-1.89833	0.41257
0.0621	2.32102	-2.50867	0.41257
0.0622	3.54172	-3.42419	0.71774
0.0623	2.93137	-1.89829	1.02292
0.0624	2.62619	-0.06723	0.41257
0.0625	2.01584	0.23796	-0.50296
0.0626	1.71066	0.54315	-1.11331
0.0627	0.79513	0.54316	-1.11331
0.0628	1.71066	0.54318	-0.50296
0.0629	2.01583	0.84837	0.10739
0.063	0.79513	0.84838	-1.41849
0.0631	0.79513	0.54322	-1.41849
0.0632	0.18478	0.23805	-1.11331
0.0633	1.40548	-0.37228	-0.50296
0.0634	0.79513	-0.67745	1.02292
0.0635	0.18477	-0.67743	0.71774
0.0636	0.79512	-2.50847	0.71774
0.0637	0.18477	-1.89811	-0.19778
0.0638	0.79512	-2.50845	-1.11331
0.0639	1.71065	-1.89808	-1.11331
0.064	4.45723	0.23816	-1.41849
0.0641	4.45723	-0.67735	-1.41849
0.0642	3.5417	-0.37216	-1.41849
0.0643	2.321	0.2382	-0.50296
0.0644	1.40547	0.84857	-0.19778
0.0645	2.01582	0.84858	0.41257
0.0646	1.71064	0.54342	-1.11331
0.0647	2.93134	-0.67727	-0.19778
0.0648	3.23652	-1.59279	1.32809
0.0649	4.15205	-1.89795	1.02292
0.065	3.84687	-1.59276	1.02292
0.0651	3.23652	0.84866	1.02292
0.0652	2.62616	0.23832	1.32809
0.0653	1.40546	-0.67719	0.10739
0.0654	1.10028	-1.59271	-0.50296
0.0655	1.71063	-1.89787	-1.11331
0.0656	2.01581	-0.98233	0.41257
0.0657	1.10028	-0.06679	0.71774
0.0658	1.40546	0.54357	0.41257
0.0659	2.01581	-0.06676	1.02292
0.066	3.54168	-0.06675	0.10739
0.0661	2.62616	-1.59262	-0.19778
0.0662	0.7951	-2.20295	-1.41849
0.0663	0.7951	-3.11847	-0.19778
0.0664	0.48992	-2.5081	1.63327
0.0665	1.71063	-0.98221	1.02292
0.0666	2.32098	0.2385	1.02292
0.0667	2.32097	2.06957	0.71774
0.0668	1.71062	0.54371	0.71774
0.0669	0.48992	-0.06663	-0.19778
0.067	0.48992	0.23856	0.10739
0.0671	0.18474	-0.0666	0.41257
0.0672	0.18474	-0.06659	1.02292
0.0673	0.18474	-0.06658	1.32809
0.0674	1.40544	-0.67692	1.02292
0.0675	1.10026	-0.6769	1.63327
0.0676	1.71062	0.23864	0.41257
0.0677	1.71061	-0.98205	0.10739
0.0678	1.10026	-0.67686	0.41257
0.0679	2.32096	-0.0665	0.10739
0.068	1.71061	1.15422	1.02292
0.0681	1.40543	2.37493	1.63327
0.0682	0.79508	2.68012	1.32809
0.0683	0.48991	1.15426	0.71774
0.0684	1.71061	-0.37161	1.63327
0.0685	2.32096	-0.06642	1.32809
0.0686	2.01578	0.23877	1.93845
0.0687	0.4899	0.54396	1.32809
0.0688	1.10025	0.2388	1.02292
0.0689	-0.42563	-0.06637	0.41257
0.069	-0.42563	-0.37153	-0.19778
0.0691	-1.34116	-0.37152	1.32809
0.0692	-2.56186	0.54402	0.71774
0.0693	-1.95151	-0.06631	1.32809
0.0694	-0.42563	0.23888	0.71774
0.0695	2.62612	-0.67664	0.10739
0.0696	2.32095	-1.59215	-0.50296
0.0697	2.01577	-0.67661	0.41257
0.0698	1.71059	-0.06625	0.71774
0.0699	1.40542	2.07	0.41257
0.07	0.48989	2.37519	0.71774
0.0701	1.40542	2.68037	-1.11331
0.0702	1.10024	2.37521	-1.11331
0.0703	0.18471	2.6804	-1.41849
0.0704	1.71059	3.29077	-0.80814
0.0705	0.79506	3.29078	1.02292
0.0706	0.48988	3.90114	1.02292
0.0707	1.10023	2.0701	1.63327
0.0708	1.71059	2.68047	1.63327
0.0709	2.32094	2.07013	1.32809
0.071	0.1847	1.15461	0.71774
0.0711	-0.12047	1.15463	-0.19778
0.0712	-1.34118	1.15464	-1.41849
0.0713	-1.95153	1.76501	-1.72366
0.0714	-1.036	1.76502	-2.94437
0.0715	-0.12048	1.45986	-3.55472
0.0716	1.4054	0.23917	-2.02884
0.0717	2.93128	0.84953	-2.33401
0.0718	2.6261	-0.37116	-1.41849
0.0719	0.79505	1.15473	-0.50296
0.072	1.10022	1.15475	-1.41849
0.0721	0.48987	0.23923	-0.19778
0.0722	1.71057	0.8496	0.41257
0.0723	3.23645	0.84961	1.02292
0.0724	2.6261	1.45998	1.63327
0.0725	2.32092	0.84964	1.93845
0.0726	0.48987	-0.06588	0.41257
0.0727	-1.03601	-0.37104	0.41257
0.0728	-1.95154	-0.37103	-0.80814
0.0729	-0.73084	-0.37101	-0.80814
0.073	0.18469	-0.371	-0.19778
0.0731	0.79504	-0.06581	-0.50296
0.0732	1.71056	0.23938	0.71774
0.0733	2.93127	2.07045	0.41257
0.0734	3.23644	1.15493	1.02292
0.0735	2.01574	1.7653	0.41257
0.0736	2.01574	2.37566	-0.80814
0.0737	0.18468	2.68085	-0.80814
0.0738	1.40538	3.59639	-0.50296
0.0739	3.23644	3.29123	0.71774
0.074	3.84679	3.29124	0.10739
0.0741	2.93126	2.07055	-0.50296
0.0742	1.71055	0.84986	-1.11331
0.0743	1.40538	-0.06565	0.10739
0.0744	1.71055	0.23954	0.41257
0.0745	2.62608	0.23955	-0.19778
0.0746	2.3209	0.84991	0.41257
0.0747	2.93125	1.46028	-0.50296
0.0748	2.3209	0.84994	0.41257
0.0749	1.1002	1.15513	-0.19778
0.075	1.1002	0.84997	-0.19778
0.0751	1.10019	1.46033	1.02292
0.0752	2.62607	1.46035	0.71774
0.0753	2.01572	1.15518	0.71774
0.0754	1.71054	1.46037	1.32809
0.0755	2.32089	0.54486	1.02292
0.0756	1.40537	0.2397	0.71774
0.0757	1.40536	-0.06547	1.63327
0.0758	1.40536	-0.06545	1.02292
0.0759	2.01571	0.23974	0.41257
0.076	2.32089	0.8501	0.41257
0.0761	2.93124	1.46047	-0.80814
0.0762	2.32089	1.76565	-1.11331
0.0763	2.93124	1.46049	-2.33401
0.0764	2.62606	-0.37055	-1.72366
0.0765	2.01571	0.54499	-2.94437
0.0766	2.32088	-0.37052	-3.24954
0.0767	2.01571	-0.37051	-3.55472
0.0768	2.01571	0.85021	-2.63919
0.0769	1.40535	0.54504	-1.41849
0.077	1.40535	0.23988	0.41257
0.0771	2.32088	0.23989	-0.19778
0.0772	2.62605	1.46061	-3.24954
0.0773	2.62605	2.9865	-3.55472
0.0774	2.32088	4.51239	-4.16507
0.0775	2.0157	3.90206	-4.16507
0.0776	2.0157	3.29172	-2.02884
0.0777	2.32087	2.3762	-1.72366
0.0778	0.48982	2.37622	-0.50296
0.0779	1.40534	3.29176	1.02292
0.078	2.32087	1.76589	1.93845
0.0781	2.32087	1.76591	1.02292
0.0782	2.32087	1.15557	1.02292
0.0783	1.10017	0.24005	0.41257
0.0784	1.40534	1.15559	-0.50296
0.0785	1.40534	-0.0651	-0.80814
0.0786	1.71051	-0.67543	-1.41849
0.0787	0.48981	-0.37025	-2.02884
0.0788	-0.12054	0.85047	-3.24954
0.0789	0.48981	1.46084	-2.02884
0.079	1.40533	2.98673	-2.63919
0.0791	4.45709	2.07121	-2.63919
0.0792	5.06744	1.46088	-2.33401
0.0793	5.37262	1.46089	-3.55472
0.0794	4.45709	0.85055	-4.16507
0.0795	3.23638	2.68162	-3.24954
0.0796	3.54156	2.68163	-1.72366
0.0797	3.54156	2.98682	-1.41849
0.0798	3.54156	1.46095	-0.80814
0.0799	2.62603	-0.06491	-1.11331
0.08	2.9312	0.24028	-1.11331
0.0801	2.9312	-0.06488	-2.02884
0.0802	3.23638	-0.37005	-3.85989
0.0803	2.9312	0.54549	-3.24954
0.0804	2.9312	1.76621	-3.24954
0.0805	1.40532	2.37657	-2.02884
0.0806	0.79497	3.29212	-3.24954
0.0807	1.40532	2.98695	-5.69095
0.0808	0.48979	2.07144	-5.99612
0.0809	0.18461	0.54557	-5.0806
0.081	-0.12056	-0.36994	-3.85989
0.0811	1.40532	1.46113	-3.24954
0.0812	3.54154	2.07149	-2.33401
0.0813	3.84672	2.07151	-2.94437
0.0814	4.45707	1.15599	-2.02884
0.0815	4.76225	1.156	-2.33401
0.0816	4.76224	2.98707	-2.33401
0.0817	4.15189	4.20779	-1.72366
0.0818	3.84672	4.2078	-1.41849
0.0819	2.93119	2.98711	0.41257
0.082	2.93119	2.37677	0.41257
0.0821	2.01566	0.85091	-1.11331
0.0822	0.1846	0.85092	-2.63919
0.0823	0.1846	1.15611	-2.33401
0.0824	-0.73093	1.15612	-2.33401
0.0825	0.48978	1.46131	-1.41849
0.0826	0.48977	1.15615	-0.80814
0.0827	0.1846	2.07169	-0.80814
0.0828	0.1846	1.76653	0.10739
0.0829	-0.12058	2.98724	-0.19778
0.083	-1.03611	3.90278	0.71774
0.0831	-1.34129	3.9028	-0.80814
0.0832	-1.64646	3.90281	-2.33401
0.0833	-2.56199	2.9873	-2.63919
0.0834	-1.64646	2.68213	-2.02884
0.0835	-1.64646	2.98732	-0.50296
0.0836	-0.12059	3.90286	-1.11331
0.0837	1.10012	2.68217	-1.41849
0.0838	1.40529	2.37701	-1.11331
0.0839	3.54152	1.15632	-0.50296
0.084	2.93117	1.76669	0.10739
0.0841	3.23634	2.68223	-0.19778
0.0842	2.62599	2.98742	-0.50296
0.0843	2.32081	4.81848	-2.33401
0.0844	2.01564	4.51332	-2.63919
0.0845	1.71046	4.51333	-3.24954
0.0846	2.32081	3.903	-2.02884
0.0847	2.62599	2.98748	-2.02884
0.0848	2.93116	2.68232	-2.63919
0.0849	2.32081	2.98751	-2.02884
0.085	2.32081	2.68235	-1.72366
0.0851	0.79493	1.76683	-1.11331
0.0852	0.18457	2.68237	-1.41849
0.0853	1.1001	0.85133	-2.33401
0.0854	1.71045	0.24099	-2.33401
0.0855	3.54151	0.85136	-1.41849
0.0856	2.62598	0.24102	-1.11331
0.0857	2.01562	1.15656	-0.50296
0.0858	1.1001	2.98763	-0.19778
0.0859	2.01562	3.59799	-1.41849
0.086	2.01562	3.29283	-0.80814
0.0861	2.01562	2.98767	-1.41849
0.0862	0.79492	1.76698	-1.72366
0.0863	-0.42579	0.85146	-1.41849
0.0864	0.79492	1.15665	-2.02884
0.0865	-0.42579	1.76702	-1.72366
0.0866	0.48974	2.98773	-1.41849
0.0867	1.10009	2.07222	-0.80814
0.0868	0.79491	1.46188	-0.50296
0.0869	2.62597	-0.97951	-0.80814
0.087	2.62596	-1.58985	-1.41849
0.0871	2.01561	-0.67431	-0.80814
0.0872	0.48973	-0.97947	-1.72366
0.0873	0.18456	-0.06393	-1.72366
0.0874	-0.4258	-0.67427	-1.41849
0.0875	-1.03615	-0.06391	-1.72366
0.0876	-0.73097	-0.67424	-0.80814
0.0877	0.18455	-0.36905	-2.02884
0.0878	1.40525	-0.97939	-2.94437
0.0879	2.62596	-0.36903	-2.02884
0.088	4.15183	-0.06384	-2.33401
0.0881	3.54148	0.24135	-2.33401
0.0882	3.54148	1.46207	-1.41849
0.0883	2.32078	2.07243	-0.50296
0.0884	0.7949	2.6828	-0.50296
0.0885	1.10007	1.76728	-0.50296
0.0886	0.79489	1.7673	-0.50296
0.0887	0.79489	1.46213	0.10739
0.0888	0.48972	0.85179	-0.19778
0.0889	-0.42581	0.24146	-0.50296
0.089	-1.03616	0.54664	-0.19778
0.0891	0.18454	2.68289	-1.11331
0.0892	-0.12064	1.76737	-0.50296
0.0893	0.18454	2.07256	-1.11331
0.0894	1.10006	0.85187	-2.33401
0.0895	0.18453	0.24154	-2.33401
0.0896	0.48971	1.15708	-2.63919
0.0897	-0.12064	0.85191	-2.94437
0.0898	0.18453	1.76745	-2.02884
0.0899	0.48971	0.54676	-0.80814
0.09	-0.12065	0.2416	-1.41849
0.0901	-0.12065	0.24161	-1.41849
0.0902	-1.64653	0.85198	-3.55472
0.0903	-1.9517	1.15717	-2.94437
0.0904	-1.34135	0.54683	-2.33401
0.0905	-0.42583	-0.36868	-1.41849
0.0906	0.18452	0.54686	-0.80814
0.0907	2.32075	1.15722	-0.50296
0.0908	2.62593	-0.06347	0.10739
0.0909	2.9311	0.85207	0.41257
0.091	3.84663	-0.67379	1.32809
0.0911	2.9311	-0.97896	0.71774
0.0912	2.62593	-0.97894	0.41257
0.0913	0.18452	-1.58928	0.10739
0.0914	-1.03619	0.24179	-0.50296
0.0915	-1.03619	0.54698	0.41257
0.0916	-1.34136	2.68322	-0.50296
0.0917	-1.03619	2.07288	0.41257
0.0918	0.79487	1.76772	-0.19778
0.0919	1.71039	1.15738	-0.50296
0.092	0.79486	1.15739	-0.50296
0.0921	0.18451	0.85223	-0.50296
0.0922	-1.64654	-0.36846	0.10739
0.0923	-0.12067	-0.06327	0.10739
0.0924	1.10004	-0.06326	1.02292
0.0925	0.79486	0.85228	0.71774
0.0926	0.48968	0.8523	1.32809
0.0927	0.18451	-0.97874	1.63327
0.0928	1.10003	-1.28391	1.02292
0.0929	0.1845	-1.89425	0.41257
0.093	-1.34138	-2.19941	-1.11331
0.0931	-1.0362	-2.19939	-1.11331
0.0932	-0.12067	-1.89421	-2.33401
0.0933	0.48968	-1.89419	-0.80814
0.0934	0.48967	-0.97865	-0.19778
0.0935	0.48967	-0.97864	0.41257
0.0936	-0.42585	-0.0631	1.02292
0.0937	0.48967	0.54727	0.71774
0.0938	0.1845	-0.06307	-0.19778
0.0939	0.18449	0.54729	-0.19778
0.094	0.48967	-0.6734	-0.19778
0.0941	-0.73103	-0.97856	-2.33401
0.0942	-1.03621	-0.67337	-2.63919
0.0943	-0.42586	-1.58888	-3.24954
0.0944	0.18449	-1.2837	-3.24954
0.0945	-0.73104	-1.89403	-2.94437
0.0946	-1.03621	-2.80955	-2.63919
0.0947	-1.34139	-1.89401	-0.80814
0.0948	-2.25692	-0.67329	-1.72366
0.0949	-2.25692	-1.89398	-0.50296
0.095	-1.34139	-1.58879	0.10739
0.0951	-0.42587	-1.89395	-0.50296
0.0952	-0.73104	-0.67324	-0.50296
0.0953	1.10001	1.46301	-1.72366
0.0954	1.40518	0.24232	-2.33401
0.0955	2.01553	0.24233	-2.94437
0.0956	1.40518	-1.28354	-2.63919
0.0957	-0.1207	-1.89387	-3.55472
0.0958	-0.1207	-1.58869	-2.63919
0.0959	0.18448	-0.36797	-1.41849
0.096	0.48965	0.2424	-1.11331
0.0961	-0.73105	-0.36794	-1.41849
0.0962	-0.73105	-0.67311	-1.72366
0.0963	-0.73105	-0.36792	-1.41849
0.0964	-1.03623	0.54762	-1.72366
0.0965	-0.42588	-1.89377	-0.80814
0.0966	1.1	-2.50411	-0.80814
0.0967	1.40517	-3.11445	-1.11331
0.0968	-0.42588	-2.80926	-2.02884
0.0969	-1.34141	-1.89372	-2.63919
0.097	-2.56212	-2.19888	-3.24954
0.0971	-2.56212	-0.67299	-3.85989
0.0972	-1.95177	-1.89368	-3.24954
0.0973	-2.25694	-1.58849	-4.77542
0.0974	-1.64659	-0.97812	-3.55472
0.0975	-0.42589	-1.28328	-2.33401
0.0976	1.09999	-0.9781	-2.63919
0.0977	0.18446	-1.28326	-1.41849
0.0978	0.18446	-1.28325	-1.11331
0.0979	0.18446	-0.3677	-1.41849
0.098	-0.12072	0.54784	-1.72366
0.0981	-0.12072	-0.0625	-1.72366
0.0982	-1.03625	0.54786	-2.94437
0.0983	-0.73107	-0.06248	-4.47025
0.0984	-1.34143	-0.97799	-4.16507
0.0985	-0.73108	-0.97798	-4.16507
0.0986	-0.4259	-2.19867	-2.94437
0.0987	-1.34143	-1.28313	-1.72366
0.0988	-1.64661	-0.67276	-0.19778
0.0989	-2.86731	-0.67275	-0.80814
0.099	-4.08801	-0.06238	-0.50296
0.0991	-4.39319	-0.67272	-0.19778
0.0992	-4.08802	-0.97788	-1.11331
0.0993	-4.39319	-0.06234	0.71774
0.0994	-2.56214	0.24285	1.02292
0.0995	-1.64661	0.85321	0.71774
0.0996	-0.42591	0.54805	0.10739
0.0997	0.79479	-2.5037	0.10739
0.0998	0.18444	-3.41921	-1.11331
0.0999	-0.73109	-3.11402	-1.72366
0.1	-2.86732	-2.50366	-1.41849
0.1001	-3.47767	-1.58812	-1.72366
0.1002	-4.3932	-0.67258	-2.33401
0.1003	-4.69838	0.54814	-3.55472
0.1004	-4.08803	-0.0622	-2.63919
0.1005	-3.78285	-0.06218	-3.85989
0.1006	-3.47768	-1.89323	-3.55472
0.1007	-2.25697	-2.19839	-2.94437
0.1008	-1.34145	-3.1139	-3.24954
0.1009	-2.56215	-3.72424	-3.55472
0.101	-1.34145	-3.11388	-3.85989
0.1011	-0.7311	-2.80869	-3.24954
0.1012	-1.64663	-0.06209	-3.55472
0.1013	-1.9518	-0.36725	-2.94437
0.1014	-2.25698	-0.36724	-4.16507
0.1015	-0.42593	0.5483	-3.85989
0.1016	0.18442	-0.97757	-4.77542
0.1017	0.18442	-1.89308	-5.38577
0.1018	-0.73111	-2.80859	-4.77542
0.1019	-1.34146	-2.80858	-5.0806
0.102	-1.64663	-4.02927	-4.47025
0.1021	-1.34146	-7.69137	-4.77542
0.1022	-1.95181	-13.4897	-5.38577
0.1023	-1.95181	-19.288	-5.0806
0.1024	-0.73111	-26.6122	-4.77542
0.1025	-1.95181	-31.1899	-4.16507
0.1026	-1.64664	-33.9364	-2.94437
0.1027	-1.64664	-35.7675	-3.24954
0.1028	-1.64664	-35.4623	-4.16507
0.1029	-1.64664	-35.7674	-4.77542
0.103	-2.86735	-35.4623	-6.3013
0.1031	-2.257	-34.8519	-7.522
0.1032	-1.64665	-35.157	-7.82718
0.1033	-1.95182	-33.0208	-8.43753
0.1034	-1.64665	-31.8001	-7.522
0.1035	-1.64665	-30.5794	-7.21683
0.1036	-1.95183	-30.2742	-5.99612
0.1037	-1.95183	-29.6638	-6.3013
0.1038	-2.86735	-29.0535	-8.13235
0.1039	-2.86736	-26.9172	-9.04788
0.104	-1.34148	-25.6965	-8.43753
0.1041	-1.34148	-24.781	-7.21683
0.1042	-0.12078	-24.4758	-6.60648
0.1043	0.48957	-25.3913	-6.3013
0.1044	-0.73113	-24.1706	-7.522
0.1045	-1.34148	-24.1705	-6.91165
0.1046	-1.64666	-24.1705	-7.82718
0.1047	-2.25701	-23.255	-8.13235
0.1048	-3.47771	-22.6446	-8.43753
0.1049	-3.78289	-22.0343	-8.43753
0.105	-3.17254	-21.4239	-8.74271
0.1051	-1.64666	-21.7291	-9.04788
0.1052	-0.12079	-23.2549	-8.74271
0.1053	0.18439	-23.2549	-8.74271
0.1054	1.40509	-23.8653	-9.65823
0.1055	1.09992	-22.6445	-11.1841
0.1056	1.71027	-22.0342	-10.8789
0.1057	-0.42597	-22.0342	-11.1841
0.1058	-0.12079	-19.8979	-10.2686
0.1059	0.48956	-19.5927	-9.35306
0.106	-0.12079	-19.2875	-9.35306
0.1061	-0.73114	-19.2875	-8.43753
0.1062	-0.12079	-19.5927	-9.96341
0.1063	1.09991	-19.2875	-9.96341
0.1064	1.40508	-18.6771	-9.96341
0.1065	2.01543	-18.6771	-10.2686
0.1066	1.40508	-17.7616	-9.96341
0.1067	1.0999	-16.2357	-10.2686
0.1068	0.18438	-16.5408	-10.5738
0.1069	-0.1208	-14.7098	-10.8789
0.107	0.48955	-15.0149	-10.5738
0.1071	-0.42598	-15.9305	-11.7945
0.1072	0.48955	-16.2356	-11.7945
0.1073	-0.73116	-15.9304	-12.0996
0.1074	-1.64668	-15.0149	-12.4048
0.1075	-1.95186	-13.489	-10.8789
0.1076	-2.56221	-11.9631	-10.2686
0.1077	-1.64669	-11.6579	-10.2686
0.1078	-1.03634	-11.3527	-10.2686
0.1079	-1.03634	-11.6579	-10.8789
0.108	-1.34151	-12.2682	-10.8789
0.1081	-1.03634	-12.8786	-11.1841
0.1082	-1.34152	-12.8786	-11.1841
0.1083	-1.03634	-11.3527	-9.96341
0.1084	-0.12081	-11.0475	-9.96341
0.1085	0.48954	-10.7423	-11.4893
0.1086	1.09989	-11.3526	-11.4893
0.1087	0.18436	-11.3526	-11.4893
0.1088	0.79471	-11.3526	-10.2686
0.1089	0.48953	-11.9629	-9.65823
0.109	0.48953	-10.7422	-10.5738
0.1091	0.79471	-8.60597	-9.04788
0.1092	0.18435	-5.85937	-9.35306
0.1093	0.18435	-5.55418	-9.35306
0.1094	0.48953	-6.16452	-9.04788
0.1095	0.18435	-7.38521	-9.04788
0.1096	-1.6467	-7.69037	-10.2686
0.1097	-1.34153	-7.08001	-10.8789
0.1098	-0.73118	-7.08	-10.5738
0.1099	0.48952	-4.94375	-9.65823
0.11	0.18435	-4.33339	-8.13235
0.1101	-0.42601	-2.8075	-9.35306
0.1102	-0.42601	-2.80748	-9.65823
0.1103	-0.42601	-4.33335	-9.96341
0.1104	0.79469	-4.63851	-9.04788
0.1105	0.48952	-5.24885	-7.82718
0.1106	0.18434	-4.94366	-8.13235
0.1107	0.18434	-4.63847	-8.13235
0.1108	-0.42601	-4.02811	-8.43753
0.1109	-0.73119	-3.72292	-9.35306
0.111	-1.03637	-3.41773	-9.04788
0.1111	-1.34154	-3.41772	-8.43753
0.1112	-1.95189	-4.33323	-8.13235
0.1113	-0.73119	-4.94357	-8.13235
0.1114	-1.03637	-5.55391	-8.13235
0.1115	0.18433	-4.94354	-8.43753
0.1116	0.48951	-6.16423	-7.522
0.1117	-1.34155	-5.55387	-8.74271
0.1118	-0.7312	-5.85903	-9.35306
0.1119	-1.64673	-4.94349	-9.04788
0.112	-1.64673	-4.02795	-9.65823
0.1121	-1.64673	-3.41758	-9.04788
0.1122	-1.03638	-3.11239	-8.43753
0.1123	-1.34155	-2.50203	-7.21683
0.1124	-1.03638	-2.19684	-6.3013
0.1125	-0.7312	-4.63823	-6.60648
0.1126	-0.42603	-4.9434	-7.21683
0.1127	0.18432	-4.94338	-7.82718
0.1128	-0.42603	-4.94337	-8.13235
0.1129	0.4895	-4.02783	-7.82718
0.113	0.18432	-4.02782	-6.3013
0.1131	0.48949	-2.19675	-6.3013
0.1132	1.09984	-1.58638	-5.38577
0.1133	1.7102	-1.58637	-6.91165
0.1134	1.40502	-1.58636	-7.21683
0.1135	0.18431	-1.28117	-7.82718
0.1136	-0.12086	-0.6708	-8.43753
0.1137	-0.42604	-0.06044	-6.91165
0.1138	0.18431	-0.67078	-6.60648
0.1139	0.79466	-0.97594	-5.99612
0.114	1.71019	0.54995	-6.91165
0.1141	1.09984	0.54997	-6.60648
0.1142	0.48948	2.07586	-7.21683
0.1143	1.09983	2.38105	-5.99612
0.1144	0.18431	0.24483	-5.38577
0.1145	2.01536	-0.36551	-6.60648
0.1146	3.23606	-0.67067	-5.99612
0.1147	2.93089	-0.36548	-7.21683
0.1148	3.23606	0.55006	-6.60648
0.1149	2.01536	1.16042	-7.82718
0.115	1.71018	0.85526	-8.43753
0.1151	0.79465	0.85527	-9.96341
0.1152	0.48947	0.24494	-11.7945
0.1153	-0.73123	-0.67058	-12.0996
0.1154	0.1843	-0.67056	-12.0996
0.1155	1.71018	-0.67055	-12.71
0.1156	2.6257	0.55017	-13.6255
0.1157	2.6257	0.55018	-13.6255
0.1158	1.71017	1.16054	-13.9307
0.1159	1.09982	1.46573	-14.2359
0.116	-0.73124	2.0761	-15.1514
0.1161	-0.42606	2.38129	-17.2876
0.1162	-0.42606	2.3813	-17.5928
0.1163	-1.34159	2.99166	-19.1187
0.1164	-1.95194	2.6865	-18.5083
0.1165	-1.34159	2.68651	-18.8135
0.1166	-0.42607	2.07618	-19.1187
0.1167	-0.12089	1.16066	-18.2032
0.1168	1.40499	0.8555	-18.2032
0.1169	2.32051	1.46586	-19.4239
0.117	3.23604	1.46588	-20.3394
0.1171	2.93086	1.46589	-21.2549
0.1172	2.01534	1.77108	-21.8653
0.1173	1.09981	1.16074	-19.4239
0.1174	-1.3416	1.46593	-18.8135
0.1175	-1.3416	2.38147	-19.1187
0.1176	-1.3416	1.46596	-19.729
0.1177	-0.73125	0.85562	-21.2549
0.1178	-0.73125	0.55046	-20.0342
0.1179	0.18427	0.85565	-19.1187
0.118	0.79462	-0.05987	-17.5928
0.1181	1.71015	1.16085	-17.5928
0.1182	2.01533	0.55051	-16.6773
0.1183	1.71015	0.8557	-16.9825
0.1184	1.71015	0.24536	-17.5928
0.1185	-0.42608	-0.0598	-18.5083
0.1186	-1.34161	0.85574	-18.5083
0.1187	-1.64679	0.55058	-17.5928
0.1188	-1.03644	2.07647	-17.5928
0.1189	1.09979	0.5506	-16.3721
0.119	2.62567	-0.67009	-16.9825
0.1191	4.45672	-0.67007	-17.2876
0.1192	4.15155	-1.28041	-16.0669
0.1193	3.23602	-1.2804	-15.4566
0.1194	2.93084	-0.36486	-15.4566
0.1195	2.62567	-0.67002	-15.7618
0.1196	2.01531	-0.36483	-15.1514
0.1197	1.71014	2.68694	-16.0669
0.1198	1.40496	4.21283	-16.0669
0.1199	1.09978	3.90767	-15.4566
0.12	2.01531	2.07663	-14.2359
0.1201	2.01531	-1.28029	-13.9307
0.1202	2.62566	-4.02686	-13.6255
0.1203	2.01531	-7.99413	-13.0152
0.1204	1.71013	-10.7407	-13.9307
0.1205	1.71013	-12.5717	-11.7945
0.1206	0.48943	-12.5717	-11.4893
0.1207	-0.12093	-12.8769	-11.4893
0.1208	0.18425	-13.4872	-12.4048
0.1209	0.48942	-14.7079	-12.71
0.121	1.09977	-15.9286	-12.0996
0.1211	2.32048	-15.0131	-13.0152
0.1212	1.40495	-14.7079	-13.3203
0.1213	1.40495	-14.0975	-14.5411
0.1214	1.09977	-14.7079	-13.9307
0.1215	0.18424	-14.4027	-13.3203
0.1216	-0.12094	-13.4871	-11.7945
0.1217	-1.64682	-12.5716	-10.8789
0.1218	-0.73129	-11.0457	-10.8789
0.1219	-0.42611	-11.9612	-9.04788
0.122	-0.73129	-11.656	-9.65823
0.1221	0.18424	-12.2664	-10.5738
0.1222	-0.12094	-12.8767	-11.4893
0.1223	1.09976	-12.8767	-12.0996
0.1224	0.79458	-12.2663	-10.8789
0.1225	1.40494	-11.3508	-10.2686
0.1226	0.48941	-10.1301	-9.35306
0.1227	-0.12095	-10.1301	-8.13235
0.1228	-0.12095	-11.0456	-7.21683
0.1229	1.71011	-9.21449	-8.13235
0.123	2.93081	-8.9093	-7.522
0.1231	2.93081	-8.29894	-7.21683
0.1232	2.93081	-7.99375	-7.21683
0.1233	-0.7313	-8.29891	-7.522
0.1234	-2.25718	-6.77302	-8.13235
0.1235	-2.25718	-7.38336	-8.13235
0.1236	-1.95201	-6.77299	-9.04788
0.1237	-0.42613	-6.16263	-9.35306
0.1238	0.79457	-5.85744	-8.74271
0.1239	2.01527	-6.1626	-8.43753
0.124	3.23598	-6.16259	-7.82718
0.1241	2.9308	-6.46775	-6.60648
0.1242	0.79457	-7.07809	-6.60648
0.1243	-0.42614	-5.85737	-7.522
0.1244	-1.34166	-6.16254	-7.82718
0.1245	-2.25719	-5.247	-9.65823
0.1246	-2.25719	-4.63663	-9.04788
0.1247	-1.64684	-4.63662	-9.04788
0.1248	0.18421	-3.72108	-10.5738
0.1249	0.18421	-4.33142	-10.8789
0.125	0.18421	-4.3314	-10.5738
0.1251	0.48938	-4.63657	-9.65823
0.1252	-0.73132	-4.0262	-8.74271
0.1253	-1.34167	-3.11066	-7.522
0.1254	-0.73132	-2.80547	-5.99612
0.1255	0.48938	-3.11063	-5.69095
0.1256	1.40491	-3.11062	-5.38577
0.1257	2.01526	-4.02613	-5.38577
0.1258	0.79455	-4.63647	-5.0806
0.1259	1.09973	-3.41576	-6.3013
0.126	-0.12098	-4.0261	-5.99612
0.1261	-1.64686	-2.80538	-6.60648
0.1262	-1.03651	-2.19501	-6.3013
0.1263	-0.42615	-1.27947	-5.69095
0.1264	0.1842	0.24642	-5.69095
0.1265	-0.12098	-0.6691	-5.38577
0.1266	0.18419	-2.50014	-5.38577
0.1267	1.09972	-1.88977	-5.69095
0.1268	1.09972	-0.36388	-5.99612
0.1269	0.79454	-1.27939	-5.99612
0.127	2.01525	-0.05868	-5.99612
0.1271	2.6256	-0.97419	-5.0806
0.1272	2.62559	-1.88971	-5.38577
0.1273	3.8463	-1.88969	-5.0806
0.1274	2.32042	-3.11038	-3.24954
0.1275	1.40489	-1.58449	-3.85989
0.1276	0.48936	-0.97413	-3.55472
0.1277	-0.73134	-0.36376	-6.3013
0.1278	-0.73134	-0.36375	-7.21683
0.1279	0.18418	-0.97409	-6.91165
0.128	1.40488	-2.49995	-5.69095
0.1281	0.48936	-3.11029	-4.47025
0.1282	-0.42617	-2.19475	-3.55472
0.1283	-0.73135	-1.88956	-2.94437
0.1284	0.18418	-1.2792	-3.85989
0.1285	0.48935	-3.11024	-4.77542
0.1286	0.18418	-3.11022	-5.69095
0.1287	0.48935	-4.02574	-4.77542
0.1288	-0.121	-3.72055	-5.0806
0.1289	0.48935	-1.58431	-5.69095
0.129	0.79452	-0.36359	-5.99612
0.1291	1.40487	0.85713	-6.91165
0.1292	2.62558	0.55196	-5.99612
0.1293	2.62558	0.85715	-5.69095
0.1294	2.62557	0.55199	-5.38577
0.1295	1.71005	0.85718	-4.77542
0.1296	1.09969	0.24684	-4.16507
0.1297	0.48934	0.24686	-4.16507
0.1298	1.09969	-0.05831	-5.38577
0.1299	1.09969	-0.66865	-6.3013
0.13	1.71004	-0.05828	-6.60648
0.1301	2.62557	-0.97379	-5.38577
0.1302	2.93074	-0.05825	-5.69095
0.1303	2.62557	0.24693	-4.16507
0.1304	1.40486	-0.97376	-3.24954
0.1305	2.01521	-0.66857	-3.24954
0.1306	2.32039	-0.36338	-2.94437
0.1307	2.32039	1.16251	-3.85989
0.1308	2.32039	0.85735	-4.16507
0.1309	1.71003	1.16254	-5.0806
0.131	1.09968	2.07808	-4.47025
0.1311	1.40486	2.99362	-4.77542
0.1312	1.71003	2.07811	-4.16507
0.1313	0.7945	0.85742	-3.85989
0.1314	1.71003	-0.36327	-2.94437
0.1315	0.7945	-2.19431	-2.63919
0.1316	-0.12103	-1.58395	-4.16507
0.1317	0.48932	-1.27876	-3.55472
0.1318	-0.42621	-0.66839	-5.0806
0.1319	0.18415	0.55232	-5.99612
0.132	0.18414	0.55234	-5.38577
0.1321	1.71002	0.55235	-4.77542
0.1322	1.71002	0.24719	-4.47025
0.1323	1.09967	-0.36315	-5.0806
0.1324	0.48932	-0.66831	-3.85989
0.1325	1.09967	0.85758	-2.94437
0.1326	2.62555	-0.05794	-2.02884
0.1327	2.93072	-0.05792	-3.24954
0.1328	2.93072	-0.36309	-4.77542
0.1329	2.01519	-1.2786	-5.69095
0.133	1.09966	-0.36306	-5.69095
0.1331	0.18413	-0.66822	-4.47025
0.1332	0.18413	1.16285	-4.47025
0.1333	1.09966	0.55251	-3.24954
0.1334	0.18413	-0.66818	-3.24954
0.1335	1.40483	-0.36299	-4.47025
0.1336	1.71001	-0.36298	-4.16507
0.1337	2.93071	0.24738	-4.77542
0.1338	2.62553	1.16293	-4.77542
0.1339	2.01518	1.46811	-3.85989
0.134	1.71001	2.38365	-3.24954
0.1341	1.09965	3.2992	-3.85989
0.1342	0.79448	2.68886	-3.85989
0.1343	1.40483	2.68887	-4.77542
0.1344	2.62553	1.77336	-4.47025
0.1345	1.40482	0.55267	-4.47025
0.1346	0.79447	0.55268	-4.16507
0.1347	1.40482	0.55269	-2.02884
0.1348	2.01517	2.07859	-2.94437
0.1349	2.32035	2.99413	-3.85989
0.135	0.18412	2.38379	-4.47025
0.1351	-0.42624	1.77345	-4.77542
0.1352	-1.34176	1.16311	-4.16507
0.1353	-0.42624	0.85795	-4.47025
0.1354	0.79446	2.38384	-5.38577
0.1355	2.01517	3.60456	-6.60648
0.1356	2.01517	2.38387	-5.38577
0.1357	2.01517	2.38388	-5.99612
0.1358	2.01516	1.16319	-5.0806
0.1359	0.79446	1.46838	-4.47025
0.136	0.48928	2.07874	-3.85989
0.1361	-0.73142	1.46841	-3.24954
0.1362	0.79446	2.38395	-4.77542
0.1363	2.01516	2.68914	-4.77542
0.1364	2.93069	2.38397	-5.69095
0.1365	3.54104	1.77363	-5.0806
0.1366	3.23586	2.68917	-4.47025
0.1367	2.93068	3.29954	-5.38577
0.1368	0.79445	3.9099	-4.77542
0.1369	-0.73143	3.90992	-4.77542
0.137	-0.42625	3.90993	-5.38577
0.1371	0.1841	3.29959	-5.69095
0.1372	0.48927	1.46855	-4.16507
0.1373	0.79445	1.16339	-4.77542
0.1374	0.48927	0.85823	-4.47025
0.1375	0.18409	-0.05729	-5.0806
0.1376	1.70997	-0.36245	-5.99612
0.1377	-0.12108	-0.66761	-5.0806
0.1378	-0.12108	0.5531	-4.77542
0.1379	0.48927	0.24794	-4.16507
0.138	0.18409	0.85831	-5.0806
0.1381	1.09962	0.55314	-4.47025
0.1382	1.40479	0.24798	-4.16507
0.1383	0.79444	-0.36236	-3.24954
0.1384	0.18409	-0.36234	-1.72366
0.1385	-0.73144	-0.05716	-1.11331
0.1386	-1.64697	-0.05714	-1.72366
0.1387	-1.95215	0.55322	-2.63919
0.1388	-1.64697	-0.97264	-1.72366
0.1389	-0.73145	-0.0571	-3.55472
0.139	-0.73145	-1.27779	-3.55472
0.1391	-0.1211	-2.19331	-3.24954
0.1392	1.09961	-1.88812	-3.55472
0.1393	0.48925	-2.19328	-3.24954
0.1394	1.0996	-0.36221	-2.33401
0.1395	2.32031	0.55333	-2.33401
0.1396	1.70995	1.16369	-2.94437
0.1397	1.70995	0.24818	-2.33401
0.1398	1.70995	-0.05698	-2.02884
0.1399	1.40478	0.55338	-1.11331
0.14	0.79442	0.24822	-2.02884
0.1401	1.40477	0.24823	-2.33401
0.1402	0.79442	0.24824	-2.63919
0.1403	0.79442	0.85861	-2.02884
0.1404	0.48924	0.55345	0.71774
0.1405	0.79442	-0.36207	-0.50296
0.1406	1.70994	-0.36205	-1.72366
0.1407	1.40477	-0.97239	-2.33401
0.1408	2.62547	0.5535	-2.02884
0.1409	2.32029	1.77422	-1.11331
0.141	2.62547	1.46905	-0.19778
0.1411	2.32029	0.85872	0.10739
0.1412	1.09959	0.24838	-0.50296
0.1413	0.48923	-1.27749	-1.11331
0.1414	1.70994	-0.66712	-1.41849
0.1415	3.23582	-1.27746	-0.50296
0.1416	4.15134	-0.36192	-0.80814
0.1417	3.84616	-0.36191	-2.02884
0.1418	2.01511	-1.5826	-1.41849
0.1419	1.70993	-1.27741	-2.02884
0.142	1.40476	-1.58257	-2.02884
0.1421	1.09958	-0.66703	-3.55472
0.1422	2.01511	-0.36184	-2.94437
0.1423	1.40475	-0.05665	-2.02884
0.1424	1.70993	0.55371	-2.02884
0.1425	1.40475	1.16408	-1.72366
0.1426	1.70993	1.16409	-0.80814
0.1427	2.62545	1.46928	-1.11331
0.1428	3.2358	2.38482	-1.72366
0.1429	2.32028	2.99518	-1.41849
0.143	1.70992	4.52108	-1.72366
0.1431	1.70992	3.60556	-0.80814
0.1432	2.32027	2.0797	-0.80814
0.1433	4.15133	1.77453	-0.80814
0.1434	4.15133	0.24867	-1.11331
0.1435	3.84615	1.77456	-3.55472
0.1436	3.54097	2.38493	-4.16507
0.1437	3.2358	3.30047	-4.16507
0.1438	4.15132	3.60566	-4.16507
0.1439	3.84614	2.99532	-3.55472
0.144	3.54097	2.99533	-2.94437
0.1441	2.32026	1.77464	-2.33401
0.1442	2.01509	1.46948	-2.02884
0.1443	2.62544	1.77467	-1.72366
0.1444	2.93061	2.69021	-2.33401
0.1445	2.62544	2.07987	-1.41849
0.1446	3.54096	2.07988	-2.33401
0.1447	3.54096	2.0799	-2.33401
0.1448	1.70991	1.77473	-2.33401
0.1449	1.40473	2.3851	-2.94437
0.145	0.18403	1.77476	-3.55472
0.1451	-0.7315	2.07995	-4.16507
0.1452	-0.7315	1.46961	-3.85989
0.1453	-0.7315	1.16445	-4.47025
0.1454	-0.12115	1.46964	-4.47025
0.1455	-0.12116	1.46965	-3.55472
0.1456	-0.12116	1.16449	-2.63919
0.1457	-0.42633	1.77485	-1.72366
0.1458	-0.12116	2.08004	-2.63919
0.1459	0.48919	1.4697	-2.63919
0.146	0.79437	2.69042	-2.63919
0.1461	0.48919	2.08008	-1.41849
0.1462	0.18401	2.69045	-2.33401
0.1463	1.09954	3.30081	-2.33401
0.1464	0.48919	2.99565	-1.41849
0.1465	0.18401	4.21636	-2.02884
0.1466	-1.64704	4.82673	-0.80814
0.1467	-1.03669	4.52157	-1.11331
0.1468	-0.42634	3.60605	-1.11331
0.1469	0.48918	2.99571	-2.33401
0.147	1.70989	1.77502	-2.94437
0.1471	2.32024	1.46986	-3.24954
0.1472	3.23576	0.85952	-2.63919
0.1473	2.93059	0.85954	-2.63919
0.1474	2.01506	2.08025	-3.55472
0.1475	-0.12117	2.08027	-2.63919
0.1476	-0.42635	2.69063	-2.63919
0.1477	-0.42635	2.08029	-2.33401
0.1478	-0.42635	1.77513	-2.63919
0.1479	0.184	1.16479	-2.63919
0.148	-0.73153	0.24928	-2.94437
0.1481	0.48917	0.55447	-2.94437
0.1482	1.09952	0.85966	-3.55472
0.1483	1.70987	1.16484	-4.77542
0.1484	1.70987	0.85968	-5.38577
0.1485	0.79434	1.16487	-5.69095
0.1486	0.48917	2.38559	-3.85989
0.1487	0.48917	2.69078	-3.55472
0.1488	1.40469	2.69079	-3.55472
0.1489	2.32022	1.4701	-4.16507
0.149	3.23575	0.85976	-4.47025
0.1491	2.62539	0.5546	-3.55472
0.1492	2.32022	2.08049	-4.16507
0.1493	1.09951	2.0805	-4.16507
0.1494	-0.42637	2.08052	-4.77542
0.1495	0.48916	2.08053	-5.0806
0.1496	0.48916	1.77537	-4.77542
0.1497	2.32021	1.77538	-4.16507
0.1498	3.54091	2.69092	-2.94437
0.1499	2.62539	3.60646	-2.63919
0.15	2.01503	2.99612	-2.33401
0.1501	1.40468	3.60649	-3.24954
0.1502	0.48915	2.99615	-2.33401
0.1503	-0.73155	3.60652	-3.55472
0.1504	-0.1212	2.38583	-4.47025
0.1505	-1.64708	0.55478	-4.16507
0.1506	-1.03673	-0.05555	-5.0806
0.1507	-2.25743	-0.97107	-4.77542
0.1508	-2.86779	0.86	-5.99612
0.1509	-3.17296	1.77554	-6.91165
0.151	-4.08849	2.69108	-6.91165
0.1511	-3.47814	3.60662	-6.60648
0.1512	-4.08849	2.99628	-5.38577
0.1513	-3.78332	3.60665	-5.0806
0.1514	-4.39367	3.30149	-4.77542
0.1515	-5.3092	1.77562	-4.47025
0.1516	-6.83508	-0.05542	-3.85989
0.1517	-7.75061	0.55494	-5.38577
0.1518	-7.44543	1.16531	-5.99612
0.1519	-6.22473	1.4705	-7.21683
0.152	-5.00403	1.47051	-8.74271
0.1521	-5.91956	-0.36053	-8.43753
0.1522	-5.61438	0.55501	-9.04788
0.1523	-5.91956	2.0809	-7.82718
0.1524	-6.52991	3.30162	-6.91165
0.1525	-5.00403	2.69128	-6.91165
0.1526	-4.39368	3.30164	-7.522
0.1527	-3.17298	4.21718	-7.21683
0.1528	-2.8678	5.13273	-6.91165
0.1529	-1.95228	4.21721	-5.99612
0.153	-2.25745	3.60687	-5.0806
0.1531	-3.17298	4.21724	-5.0806
0.1532	-4.69886	2.08102	-4.47025
0.1533	-5.30922	2.38621	-6.3013
0.1534	-5.30922	1.77587	-6.3013
0.1535	-5.00404	1.47071	-6.60648
0.1536	-4.08851	2.08107	-7.522
0.1537	-5.30922	2.08109	-8.13235
0.1538	-4.39369	1.47075	-8.13235
0.1539	-2.86781	0.86041	-7.522
0.154	-2.56264	0.86042	-7.522
0.1541	-3.47817	1.47079	-7.21683
0.1542	-5.00405	1.77598	-7.522
0.1543	-4.3937	0.86046	-7.21683
0.1544	-3.47817	1.47083	-7.522
0.1545	-1.64712	1.77602	-8.74271
0.1546	-1.03677	0.55533	-7.522
0.1547	-0.42642	1.47087	-7.21683
0.1548	-1.34194	0.55535	-6.3013
0.1549	-0.73159	0.86054	-7.522
0.155	-1.03677	1.16573	-7.82718
0.1551	-2.56265	0.86057	-6.91165
0.1552	-1.64712	1.16576	-6.60648
0.1553	-1.64712	0.86059	-5.69095
0.1554	-0.42642	1.47096	-5.38577
0.1555	0.4891	2.08132	-4.77542
0.1556	-0.42642	2.69169	-4.47025
0.1557	-1.03678	2.6917	-4.16507
0.1558	-1.03678	3.60724	-4.16507
0.1559	-0.12125	3.91243	-2.94437
0.156	0.4891	3.60727	-2.33401
0.1561	2.01498	3.91246	-2.63919
0.1562	2.9305	3.30212	-2.94437
0.1563	3.54085	3.30213	-4.77542
0.1564	2.9305	2.6918	-3.85989
0.1565	1.09945	2.38663	-3.85989
0.1566	0.18392	1.47112	-3.55472
0.1567	-0.42643	0.5556	-3.85989
0.1568	0.18392	-0.05473	-4.47025
0.1569	0.18392	0.25046	-5.0806
0.157	-0.12126	0.86082	-4.77542
0.1571	-0.73161	2.38671	-4.77542
0.1572	-0.73161	3.30225	-5.69095
0.1573	0.18391	2.99709	-5.38577
0.1574	0.79426	3.30228	-5.38577
0.1575	0.79426	2.99712	-4.16507
0.1576	1.09944	2.38678	-3.55472
0.1577	0.18391	2.38679	-4.47025
0.1578	-0.73162	2.08163	-4.16507
0.1579	-0.12127	3.60752	-4.47025
0.158	0.18391	2.08166	-4.47025
0.1581	-0.42645	1.16614	-5.69095
0.1582	-1.0368	0.86098	-5.38577
0.1583	-2.2575	0.25064	-4.77542
0.1584	-1.95233	0.55583	-3.85989
0.1585	-2.25751	1.16619	-4.16507
0.1586	-2.25751	0.86103	-2.63919
0.1587	-1.0368	1.4714	-2.63919
0.1588	-0.12128	2.08176	-3.55472
0.1589	0.79425	0.5559	-2.94437
0.159	1.70978	2.69214	-3.24954
0.1591	2.6253	2.0818	-3.55472
0.1592	2.01495	1.77664	-2.94437
0.1593	1.4046	2.99735	-2.94437
0.1594	-0.42646	2.08184	-2.94437
0.1595	-0.12128	2.99738	-3.55472
0.1596	-0.42646	2.38704	-2.94437
0.1597	-0.73164	2.08188	-4.47025
0.1598	0.18389	2.08189	-4.77542
0.1599	-0.12129	1.77673	-4.77542
0.16	0.79424	0.86122	-4.16507
0.1601	1.09941	-0.0543	-3.85989
0.1602	1.09941	-0.35946	-3.85989
0.1603	-0.42647	-0.05427	-2.94437
0.1604	-1.03682	2.08197	-3.85989
0.1605	-1.03682	2.08199	-3.24954
0.1606	-0.42647	2.082	-2.94437
0.1607	1.40458	1.47166	-2.94437
0.1608	2.01493	0.55615	-2.33401
0.1609	3.23564	1.16651	-2.63919
0.161	2.01493	0.86135	-2.33401
0.1611	1.40458	1.16654	-2.94437
0.1612	0.79423	2.69243	-1.72366
0.1613	-0.73165	2.38727	-2.02884
0.1614	-0.1213	1.47175	-1.41849
0.1615	0.18387	1.77694	-2.33401
0.1616	1.0994	1.47178	-2.63919
0.1617	1.0994	1.47179	-3.85989
0.1618	1.70975	0.86146	-5.38577
0.1619	1.0994	-0.05406	-5.69095
0.162	1.0994	1.47183	-6.3013
0.1621	0.18387	0.25114	-5.99612
0.1622	0.18387	0.86151	-6.60648
0.1623	0.79422	1.1667	-6.3013
0.1624	0.18387	-0.05399	-5.0806
0.1625	0.79422	1.16672	-4.77542
0.1626	0.18386	1.47191	-4.77542
0.1627	0.79421	1.47193	-3.55472
0.1628	2.62527	-0.05394	-2.02884
0.1629	2.62527	-1.27463	-2.33401
0.163	2.62527	-0.96944	-3.24954
0.1631	1.70974	0.86163	-4.77542
0.1632	1.70974	1.77717	-5.69095
0.1633	0.48903	2.08236	-6.3013
0.1634	1.09938	1.16684	-6.91165
0.1635	0.48903	0.25133	-5.38577
0.1636	1.40456	1.16687	-5.0806
0.1637	1.09938	0.55653	-4.16507
0.1638	1.70973	0.55654	-3.85989
0.1639	2.93043	1.16691	-3.24954
0.164	1.70973	0.55657	-2.02884
0.1641	2.0149	0.86176	-2.02884
0.1642	1.40455	0.25142	-1.72366
0.1643	1.40455	0.25143	-1.72366
0.1644	2.0149	0.55662	-2.33401
0.1645	1.70973	2.38769	-3.55472
0.1646	2.32008	2.3877	-2.63919
0.1647	2.93043	2.38772	-2.02884
0.1648	3.2356	1.77738	-2.63919
0.1649	1.70972	1.77739	-2.94437
0.165	1.09937	2.08258	-2.94437
0.1651	1.09937	1.77742	-2.02884
0.1652	1.09937	3.60849	-2.02884
0.1653	2.01489	3.91368	-2.94437
0.1654	2.01489	4.21886	-3.55472
0.1655	3.54077	4.82923	-4.47025
0.1656	2.93042	3.91372	-5.0806
0.1657	3.54077	2.38785	-4.77542
0.1658	3.84594	1.47234	-3.55472
0.1659	3.54077	2.0827	-3.55472
0.166	2.01489	1.47236	-2.63919
0.1661	1.09936	2.3879	-2.94437
0.1662	1.09936	1.16721	-2.63919
0.1663	1.70971	1.4724	-4.16507
0.1664	2.32006	0.55689	-5.0806
0.1665	2.01488	-0.6638	-4.16507
0.1666	4.15111	0.55691	-4.47025
0.1667	3.84594	0.55693	-4.77542
0.1668	3.23558	1.77764	-5.0806
0.1669	2.62523	2.38801	-4.16507
0.167	0.79417	3.30355	-3.55472
0.1671	0.489	3.30356	-2.33401
0.1672	0.18382	3.91393	-3.55472
0.1673	2.01488	2.69324	-4.77542
0.1674	2.01487	2.38808	-4.77542
0.1675	2.01487	3.30362	-6.60648
0.1676	1.7097	2.3881	-5.99612
0.1677	2.9304	2.38811	-6.60648
0.1678	3.84593	1.77778	-5.38577
0.1679	3.23557	2.38814	-5.0806
0.168	2.62522	3.30368	-4.77542
0.1681	1.09934	2.69334	-4.47025
0.1682	1.09934	2.083	-5.0806
0.1683	1.70969	1.77784	-5.38577
0.1684	2.32004	2.69338	-5.69095
0.1685	3.54074	2.08304	-4.16507
0.1686	3.23557	2.38823	-4.47025
0.1687	3.54074	1.7779	-3.85989
0.1688	2.62521	0.86238	-3.85989
0.1689	2.32004	0.25204	-3.85989
0.169	1.40451	0.25206	-3.24954
0.1691	1.09933	1.47277	-4.16507
0.1692	-0.12137	2.08314	-4.16507
0.1693	-0.73173	2.6935	-4.16507
0.1694	-0.12137	2.08316	-3.85989
0.1695	0.48898	0.5573	-4.16507
0.1696	1.4045	1.47284	-4.16507
0.1697	-0.73173	2.0832	-3.85989
0.1698	-0.73173	2.69357	-4.77542
0.1699	-0.42656	3.60911	-4.47025
0.17	-0.12138	2.69359	-4.16507
0.1701	1.70967	1.16773	-3.55472
0.1702	2.01485	0.55739	-4.47025
0.1703	3.54073	0.25223	-5.0806
0.1704	3.8459	1.16777	-6.3013
0.1705	3.54072	2.08331	-5.99612
0.1706	2.32002	2.08332	-4.77542
0.1707	2.01484	2.69369	-4.16507
0.1708	1.40449	1.473	-2.33401
0.1709	2.32002	3.30407	-2.02884
0.171	2.62519	4.21961	-1.41849
0.1711	1.70966	5.44032	-2.33401
0.1712	2.01484	5.44034	-2.63919
0.1713	1.09931	4.52482	-3.55472
0.1714	1.09931	3.91448	-3.55472
0.1715	1.09931	2.38862	-3.85989
0.1716	0.79413	1.4731	-5.69095
0.1717	2.01483	0.86277	-5.99612
0.1718	2.01483	2.38866	-6.60648
0.1719	1.09931	3.3042	-5.99612
0.172	1.0993	3.60939	-4.16507
0.1721	0.48895	4.52493	-3.85989
0.1722	-0.73175	4.83012	-2.94437
0.1723	-0.1214	5.74566	-3.24954
0.1724	0.48895	4.21979	-2.02884
0.1725	1.40448	2.69393	-2.02884
0.1726	2.01483	1.47324	-2.63919
0.1727	0.48895	1.16807	-2.63919
0.1728	0.79412	1.47326	-2.94437
0.1729	0.18377	2.3888	-2.94437
0.173	1.70965	2.69399	-3.24954
0.1731	4.15105	2.38883	-3.55472
0.1732	3.5407	2.99919	-4.16507
0.1733	2.32	1.7785	-3.24954
0.1734	2.01482	1.47334	-3.24954
0.1735	2.62517	1.16818	-2.94437
0.1736	4.15105	1.16819	-1.41849
0.1737	5.37175	2.08373	-1.72366
0.1738	4.7614	2.08375	-1.72366
0.1739	3.23552	3.30446	-2.33401
0.174	1.40446	3.60965	-2.63919
0.1741	-0.42659	3.91484	-2.94437
0.1742	0.48893	3.60968	-2.33401
0.1743	-0.4266	2.99934	-1.41849
0.1744	0.79411	2.389	0.10739
0.1745	2.01481	2.99937	-0.50296
0.1746	2.93034	2.99938	-1.72366
0.1747	2.93033	2.08387	-1.11331
0.1748	1.70963	2.99941	-1.72366
0.1749	1.09928	1.77872	-0.80814
0.175	1.09928	2.38908	-0.80814
0.1751	-0.12143	2.69427	-2.02884
0.1752	-1.34213	2.69428	-2.02884
0.1753	1.40445	3.30465	-2.63919
0.1754	2.93033	2.69431	-2.33401
0.1755	3.2355	3.60985	-2.02884
0.1756	2.62515	3.60986	-2.63919
0.1757	1.40445	3.91505	-3.55472
0.1758	2.31997	2.69436	-2.63919
0.1759	2.0148	2.3892	-1.41849
0.176	2.93032	1.77886	-0.50296
0.1761	3.2355	1.77887	-0.80814
0.1762	2.31997	1.77889	-2.33401
0.1763	1.70962	1.47373	-2.94437
0.1764	1.40444	2.38927	-5.0806
0.1765	1.09926	1.47375	-5.0806
0.1766	2.01479	1.16859	-4.16507
0.1767	1.70961	0.25308	-2.94437
0.1768	-0.12144	-0.05209	-2.94437
0.1769	-0.42662	0.55828	-4.16507
0.177	-1.03697	0.55829	-5.69095
0.1771	-0.12145	2.08418	-5.0806
0.1772	0.79408	1.47384	-3.24954
0.1773	-0.7318	0.86351	-4.16507
0.1774	-0.7318	0.86352	-4.16507
0.1775	-0.12145	1.16871	-4.16507
0.1776	0.4889	0.55837	-2.63919
0.1777	-0.12145	0.86356	-1.72366
0.1778	0.79408	0.25322	-1.72366
0.1779	0.79407	-0.96747	-1.72366
0.178	1.40443	-0.05193	-3.24954
0.1781	2.31995	-1.27262	-3.55472
0.1782	2.9303	-1.57778	-3.24954
0.1783	2.9303	-0.66224	-2.33401
0.1784	2.01477	-0.66223	-1.72366
0.1785	2.62512	1.16884	-2.63919
0.1786	2.01477	1.77921	-3.55472
0.1787	2.9303	2.08439	-3.85989
0.1788	3.23547	1.47406	-2.94437
0.1789	2.31994	1.77925	-4.77542
0.179	2.93029	0.86373	-4.47025
0.1791	3.54065	-0.05178	-5.38577
0.1792	3.54064	-0.35695	-6.3013
0.1793	2.01476	-0.35693	-5.38577
0.1794	1.40441	-0.05174	-4.77542
0.1795	1.40441	-1.88278	-3.85989
0.1796	2.01476	-1.88277	-3.55472
0.1797	2.93029	-3.40864	-1.72366
0.1798	2.01476	-2.79827	-1.41849
0.1799	1.40441	-0.9672	-2.63919
0.18	1.70958	-1.27237	-3.85989
0.1801	3.23546	-0.35683	-3.55472
0.1802	3.54064	-0.05164	-2.94437
0.1803	3.54063	1.16908	-1.41849
0.1804	2.93028	1.16909	-0.19778
0.1805	2.62511	1.16911	-1.72366
0.1806	2.01475	0.86394	-1.72366
0.1807	1.70958	-0.05157	-1.41849
0.1808	2.31993	-0.05156	-1.72366
0.1809	2.93028	0.25363	-1.41849
0.181	3.23545	0.864	-1.11331
0.1811	3.23545	-0.35669	-1.72366
0.1812	2.93027	-0.96703	-2.94437
0.1813	2.93027	-2.4929	-3.55472
0.1814	1.40439	-2.49288	-3.55472
0.1815	1.70957	-1.88252	-1.72366
0.1816	1.70957	-0.96698	-0.80814
0.1817	3.23545	-1.57732	-0.50296
0.1818	3.8458	-0.3566	-0.19778
0.1819	3.54062	0.25376	-0.80814
0.182	4.45615	-0.35657	0.10739
0.1821	3.84579	0.55897	-1.11331
0.1822	3.23544	-1.27208	-2.33401
0.1823	2.93026	-0.66171	-2.63919
0.1824	2.93026	-0.35652	-2.33401
0.1825	1.09921	-0.96686	-1.72366
0.1826	1.70956	0.55903	-1.72366
0.1827	2.31991	0.55905	-1.41849
0.1828	3.23544	1.47459	-1.72366
0.1829	3.84579	1.77977	-0.19778
0.183	3.54061	0.55908	-0.50296
0.1831	4.45614	-0.35643	-1.11331
0.1832	2.01473	-0.96677	-2.33401
0.1833	1.70955	-0.96675	-2.94437
0.1834	2.62508	-0.05121	-1.72366
0.1835	2.62508	1.1695	-1.41849
0.1836	2.62508	-0.05119	-1.11331
0.1837	2.01472	0.86435	-0.80814
0.1838	2.62508	-0.05116	-0.50296
0.1839	2.93025	0.25403	-1.41849
0.184	3.5406	1.16957	-2.63919
0.1841	1.40437	0.86441	-2.63919
0.1842	1.70954	1.1696	-1.72366
0.1843	1.09919	-0.35627	-1.11331
0.1844	1.09919	-1.88214	-0.50296
0.1845	2.93024	-1.88212	0.71774
0.1846	3.23542	-0.96658	0.41257
0.1847	2.93024	-0.35622	-1.11331
0.1848	1.40436	1.16967	-1.41849
0.1849	1.09919	2.69557	-2.02884
0.185	1.40436	3.00076	-2.63919
0.1851	-0.12152	3.00077	-3.24954
0.1852	-1.03705	0.55938	-2.02884
0.1853	0.48883	0.86457	-2.02884
0.1854	1.40436	1.47493	-2.33401
0.1855	1.70953	2.69565	-2.94437
0.1856	2.31988	3.61119	-2.94437
0.1857	1.40435	2.08532	-2.94437
0.1858	1.40435	0.55946	-4.16507
0.1859	0.794	-0.35606	-4.47025
0.186	0.794	-0.05087	-3.85989
0.1861	2.0147	-0.66121	-2.33401
0.1862	2.0147	-0.05084	-2.94437
0.1863	2.62505	-0.05083	-2.94437
0.1864	1.70952	0.25436	-2.63919
0.1865	1.70952	0.25437	-3.85989
0.1866	0.48882	0.55956	-2.33401
0.1867	0.79399	2.08545	-2.33401
0.1868	1.70952	1.78029	-2.33401
0.1869	2.93022	1.47513	-2.33401
0.187	2.62505	0.25444	-2.94437
0.1871	2.01469	-2.18695	-4.77542
0.1872	3.84575	-2.79729	-5.69095
0.1873	3.84575	-3.10246	-5.38577
0.1874	4.15092	-3.71279	-4.77542
0.1875	3.54057	-4.01796	-2.94437
0.1876	2.62504	-3.71277	-2.94437
0.1877	2.93021	-2.49205	-1.72366
0.1878	2.62504	-1.27133	-2.33401
0.1879	2.62504	-0.96615	-2.94437
0.188	2.31986	-0.35578	-3.24954
0.1881	3.84574	-0.35577	-3.55472
0.1882	2.93021	-0.05058	-3.55472
0.1883	2.62503	1.17014	-3.55472
0.1884	3.23538	0.5598	-3.55472
0.1885	3.84574	0.86499	-4.47025
0.1886	3.54056	1.17018	-4.16507
0.1887	2.62503	0.86501	-4.16507
0.1888	3.23538	1.1702	-4.47025
0.1889	2.9302	0.25469	-3.55472
0.189	2.62503	-0.05047	-3.24954
0.1891	2.01467	-0.66081	-1.72366
0.1892	0.79397	-1.57633	-2.02884
0.1893	1.09915	-2.79701	-1.72366
0.1894	1.09914	-1.88147	-2.02884
0.1895	1.09914	-0.35558	-2.02884
0.1896	0.79397	1.47549	-2.33401
0.1897	1.70949	2.39103	-1.72366
0.1898	0.18361	1.78069	-0.80814
0.1899	0.18361	2.08588	-0.50296
0.19	0.79396	1.47554	-0.50296
0.1901	2.01467	2.0859	-2.33401
0.1902	2.93019	2.69627	-0.80814
0.1903	2.01466	2.08593	-1.11331
0.1904	2.01466	0.56006	-1.41849
0.1905	1.70949	-1.27098	-1.11331
0.1906	3.23536	-2.49167	-2.33401
0.1907	5.37159	-3.10201	-2.63919
0.1908	5.67677	-1.57611	-3.24954
0.1909	4.45606	-2.49163	-2.63919
0.191	3.54054	-1.57609	-2.63919
0.1911	4.15089	-1.2709	-2.33401
0.1912	4.15089	-0.96571	-2.02884
0.1913	5.06641	-0.05017	-2.33401
0.1914	3.84571	-1.27086	-1.72366
0.1915	2.31983	0.25503	-1.72366
0.1916	1.09912	0.56022	-0.19778
0.1917	1.09912	-0.05012	-1.72366
0.1918	1.70947	-0.66045	-1.72366
0.1919	1.70947	-0.96562	-2.94437
0.192	2.93018	-0.66043	-3.85989
0.1921	2.31982	-0.35524	-2.94437
0.1922	0.48877	0.25513	-2.94437
0.1923	-0.12159	1.17067	-2.63919
0.1924	0.79394	3.30691	-4.47025
0.1925	1.09912	3.30692	-5.0806
0.1926	2.01464	3.61211	-4.47025
0.1927	2.62499	3.00177	-3.55472
0.1928	2.01464	0.86556	-3.55472
0.1929	2.31982	0.86557	-4.16507
0.193	1.09911	1.17076	-2.94437
0.1931	0.18358	2.39148	-1.72366
0.1932	-0.73194	1.78114	-0.50296
0.1933	-1.95265	1.47598	-1.72366
0.1934	-2.86818	0.56046	-1.41849
0.1935	-6.53029	-0.04988	-2.02884
0.1936	-10.8028	-0.66022	-2.94437
0.1937	-15.0752	-1.27055	-2.94437
0.1938	-17.2114	-0.96536	-3.24954
0.1939	-20.2632	-0.66018	-2.94437
0.194	-25.146	0.86572	-3.24954
0.1941	-29.1133	0.56055	-2.63919
0.1942	-30.334	1.17092	-1.41849
0.1943	-30.9444	0.86576	-0.50296
0.1944	-31.8599	0.56059	-1.41849
0.1945	-30.6392	-0.04974	-2.02884
0.1946	-30.9444	0.25544	-2.33401
0.1947	-31.5547	1.47616	-2.94437
0.1948	-31.8599	1.78135	-2.63919
0.1949	-31.5547	1.78136	-3.55472
0.195	-30.9444	0.86585	-2.94437
0.1951	-30.0288	-0.04967	-1.11331
0.1952	-28.8081	-0.04965	-1.11331
0.1953	-28.1978	-0.35481	-2.02884
0.1954	-26.9771	-0.04963	-2.94437
0.1955	-27.2823	-0.65996	-3.24954
0.1956	-26.3667	1.1711	-3.85989
0.1957	-25.4512	1.17112	-4.16507
0.1958	-23.9253	1.17113	-5.0806
0.1959	-22.3995	0.56079	-5.0806
0.196	-23.0098	-0.6599	-4.77542
0.1961	-21.7891	-0.35471	-4.47025
0.1962	-21.4839	-0.96505	-2.94437
0.1963	-21.7891	-0.35468	-2.63919
0.1964	-21.1788	0.25568	-0.80814
0.1965	-20.2632	0.56087	-1.72366
0.1966	-18.7374	0.56088	-3.24954
0.1967	-18.4322	0.5609	-3.55472
0.1968	-18.127	-0.04944	-3.24954
0.1969	-18.127	-0.96495	-3.55472
0.197	-17.2115	-0.35459	-2.02884
0.1971	-17.5167	-0.0494	-1.11331
0.1972	-16.9063	0.86614	-2.63919
0.1973	-15.6856	0.86615	-2.63919
0.1974	-15.3804	-0.04936	-2.94437
0.1975	-13.8545	0.561	-1.72366
0.1976	-15.0753	-0.04933	-1.11331
0.1977	-14.4649	0.25585	-0.50296
0.1978	-13.8546	1.47657	0.10739
0.1979	-14.4649	3.61281	-0.80814
0.198	-15.0753	2.39212	0.10739
0.1981	-14.4649	2.08696	-1.41849
0.1982	-13.8546	1.17145	-1.72366
0.1983	-11.4131	0.56111	-1.11331
0.1984	-9.27691	-0.65958	-1.11331
0.1985	-9.88727	-1.88027	-2.63919
0.1986	-9.27692	-1.57508	-4.16507
0.1987	-9.27692	-1.88024	-4.77542
0.1988	-8.97174	-2.18541	-5.0806
0.1989	-7.75104	-2.49057	-3.55472
0.199	-7.75104	-2.18538	-4.16507
0.1991	-7.14069	-1.88019	-3.85989
0.1992	-7.44587	-1.575	-4.16507
0.1993	-6.53034	-1.26981	-4.16507
0.1994	-6.53034	-1.2698	-3.24954
0.1995	-6.53034	-0.35426	-3.24954
0.1996	-5.61482	-1.88012	-1.72366
0.1997	-6.83552	-0.96458	-1.11331
0.1998	-7.44587	-1.57492	-1.11331
[truncated: 18,001 more rows]

## Sheet: Fig.9b
0.25 µM APP17	30 µM baclofen
82.0513	66.6667
108.333	54.1667
83.9583	62.5
162.5	108.333
71.0526	65.2632
72.7273	63.6364
84.6154	53.8462
130	90
106.667	70
133.663	100.99
70.5882	41.1765
69.863	31.5069

## Sheet: Fig.9c
Traces eEPSCs
Time (ms)	baseline	0.25 µM APP17	20 µM baclofen
0.1	27.66	33	14.7
0.2	25.99	36.05	12.48
0.3	23.49	37.98	12.48
0.4	20.43	39.64	15.5
0.5	21.25	36.57	15.78
0.6	20.69	30.19	12.45
0.7	22.9	27.14	15.78
0.8	24.29	24.62	18.83
0.9	25.39	24.62	22.68
1	24.27	22.66	21.57
1.1	22.05	24.05	20.46
1.2	19.82	27.38	20.74
1.3	17.6	30.97	22.4
1.4	18.7	32.35	22.37
1.5	19.8	28.73	18.21
1.6	21.74	29.28	20.71
1.7	25.89	27.9	22.09
1.8	30.6	25.94	21.82
1.9	33.37	22.33	17.34
2	34.47	22.03	12.91
2.1	33.91	24.81	13.46
2.2	31.96	27.3	15.68
2.3	34.18	28.4	18.73
2.4	33.06	25.62	13.43
2.5	32.78	28.65	14.26
2.6	32.21	28.93	15.09
2.7	35.81	29.49	17.87
2.8	37.75	26.97	18.98
2.9	37.74	25.31	17.56
3	34.41	28.34	20.89
3.1	29.68	31.11	22.27
3.2	26.63	34.17	22.55
3.3	23.29	30.82	15.34
3.4	20.51	31.65	11.7
3.5	18.01	31.35	11.42
3.6	16.06	28.58	12.53
3.7	17.99	26.08	11.98
3.8	16.88	22.18	10.59
3.9	16.87	23.85	15.27
4	17.97	27.43	19.71
4.1	22.13	28.82	23.32
4.2	26.56	26.88	22.49
4.3	30.44	27.42	23.04
4.4	30.99	28.52	24.95
4.5	31.26	27.95	25.79
4.6	30.97	26.01	24.12
4.7	27.36	20.74	18.02
4.8	24.3	20.72	16.63
4.9	24.02	21.27	17.43
5	25.12	24.31	17.15
5.1	27.06	24.31	15.49
5.2	26.77	25.42	12.44
5.3	26.21	27.9	13.55
5.4	25.93	31.5	16.29
5.5	28.42	30.37	14.9
5.6	27.86	26.49	11.02
5.7	26.46	26.77	11.57
5.8	26.46	27.3	14.35
5.9	27.84	28.14	15.7
6	30.33	27.56	14.04
6.1	28.93	27.56	11.54
6.2	27.82	29.51	15.42
6.3	27.81	31.71	19.31
6.4	28.64	33.09	21.5
6.5	29.19	28.64	16.78
6.6	29.18	30.02	14.56
6.7	29.17	30.58	14.56
6.8	31.94	30	13.17
6.9	35.26	26.95	12.03
7	36.09	24.16	7.87
7.1	35.81	26.38	9.26
7.2	31.64	29.99	12.59
7.3	29.41	33.57	15.64
7.4	27.18	31.91	15.33
7.5	24.96	33.56	14.5
7.6	23.84	33.28	15.05
7.7	25.5	32.45	16.16
7.8	26.61	31.6	16.44
7.9	26.04	27.99	13.91
8	26.59	29.64	16.13
8.1	27.14	31.3	17.52
8.2	28.8	33.52	17.52
8.3	30.18	33.5	15.85
8.4	30.17	32.67	12.49
8.5	29.61	32.65	12.21
8.6	29.88	34.59	12.49
8.7	31.82	32.37	12.49
8.8	31.53	25.42	7.22
8.9	32.08	24.31	7.74
9	32.08	24.29	8.85
9.1	34.01	25.95	9.68
9.2	35.67	24.29	9.13
9.3	34.83	24.55	7.46
9.4	34.27	26.49	8.82
9.5	33.15	27.03	13.26
9.6	32.87	27.58	15.2
9.7	31.75	23.14	11.87
9.8	30.91	24.51	12.15
9.9	29.8	27.56	14.61
10	28.96	30.6	15.17
10.1	29.23	31.98	14.06
10.2	29.22	31.15	11.56
10.3	29.49	31.97	14.06
10.4	28.38	31.69	16.8
10.5	29.2	29.45	19.58
10.6	29.75	24.46	17.08
10.7	29.74	24.18	14.58
10.8	30.02	24.72	15.14
10.9	30.29	27.77	15.66
11	31.39	30.25	13.72
11.1	30.83	27.75	10.11
11.2	31.38	28.3	10.67
11.3	30.82	29.12	12.05
11.4	31.09	30.5	13.69
11.5	30.53	28.82	10.91
11.6	28.3	29.38	7.31
11.7	26.63	31.32	9.8
11.8	24.68	32.96	13.96
11.9	24.67	33.52	15.87
12	24.11	28.51	13.38
12.1	24.94	28.23	16.43
12.2	120.09	88.99	64.15
12.3	-707.78	-700.06	-605.59
12.4	-672.16	-594.79	-221.81
12.5	-592.26	-571.78	-156.89
12.6	-955.7	-4.29	-696.21
12.7	-774.81	-869.45	-736.14
12.8	260.71	131.1	82.98
12.9	731.65	565.71	372.18
13	485.98	279.8	202.23
13.1	561.44	320.03	223.87
13.2	126.14	873.08	611.88
13.3	414.8	174.21	983.77
13.4	645.75	450.67	340.37
13.5	-12.33	-130.29	-163.72
13.6	-459.56	-486.8	-465.01
13.7	-664.31	-612.47	-560.73
13.8	-659.6	-553.12	-496.92
13.9	-507.3	-368.91	-333.26
14	-280.36	-144.48	-133.23
14.1	-48.71	59.15	43.77
14.2	139.1	200.09	164.17
14.3	256.45	265.55	212.45
14.4	299.17	264.71	208.81
14.5	278.63	217.25	163.86
14.6	217.87	146.23	101.44
14.7	139.9	71.88	35.41
14.8	66.38	14.43	-16.19
14.9	9.5	-19.69	-42.58
15	-20.75	-31.08	-48.13
15.1	-27.14	-24.43	-38.69
15.2	-16.88	-10	-27.6
15.3	3.37	12.73	-7.62
15.4	25	33.82	8.71
15.5	44.97	49.61	20.64
15.6	60.22	56.27	24.81
15.7	66.6	54.88	20.92
15.8	62.98	50.98	19.81
15.9	54.65	45.43	17.01
16	44.66	39.03	13.12
16.1	32.72	30.71	5.91
16.2	23.84	29.88	3.97
16.3	16.34	29.58	6.19
16.4	13.56	31.25	8.1
16.5	17.44	31.5	8.93
16.6	20.76	30.95	4.21
16.7	24.08	33.72	5.6
16.8	28.24	37.31	8.93
16.9	32.67	40.09	8.9
17	35.72	35.63	5.01
17.1	36.82	34.24	2.79
17.2	35.98	31.74	3.63
17.3	34.31	30.62	2.52
17.4	32.64	30.06	1.65
17.5	29.03	26.44	-2.51
17.6	26.24	26.16	-1.96
17.7	25.96	25.33	0.82
17.8	28.73	25.31	3.04
17.9	29.83	21.98	3.28
18	27.61	20.3	0.23
18.1	27.32	22.79	3.84
18.2	28.42	24.74	6.06
18.3	30.36	26.38	5.78
18.4	31.19	25.83	0.76
18.5	30.07	27.47	0.48
18.6	25.62	26.92	2.14
18.7	20.9	26.36	4.36
18.8	21.17	25.23	4.64
18.9	18.11	24.68	1
19	18.94	26.88	3.22
19.1	18.93	28.82	4.88
19.2	20.31	29.1	5.16
19.3	19.48	23.81	2.94
19.4	20.58	20.76	5.69
19.5	19.19	20.19	8.18
19.6	18.9	18.52	11.23
19.7	20	16.02	10.12
19.8	20.83	12.95	5.41
19.9	20.82	14.9	7.32
20	21.65	18.48	8.71
20.1	22.75	22.37	7.04
20.2	19.69	22.37	2.05
20.3	19.69	24.29	0.1
20.4	20.24	26.23	-0.48
20.5	22.17	24.27	0.35
20.6	24.66	18.45	-1.04
20.7	25.49	10.12	-6.86
20.8	26.59	8.72	-5.2
20.9	27.97	12.05	-4.4
21	31.85	15.64	-2.46
21.1	32.12	17.3	-2.18
21.2	31.56	21.18	-2.18
21.3	31.55	25.6	2.54
21.4	30.99	28.93	6.39
21.5	29.32	29.75	8.61
21.6	27.09	23.37	3.62
21.7	22.93	20.32	1.4
21.8	20.15	17.8	-1.66
21.9	19.86	15.86	-2.52
22	22.07	13.34	-6.96
22.1	15.69	2.52	-19.17
22.2	31.22	21.67	-3.91
22.3	29.82	23.31	-1.97
22.4	25.65	22.76	-3.38
22.5	20.38	17.19	-11.43
22.6	17.6	15.25	-12.54
22.7	15.65	14.69	-11.43
22.8	13.98	14.12	-7.82
22.9	16.47	12.18	-6.19
23	17.29	10.77	-7.02
23.1	18.67	12.99	-4.8
23.2	20.33	14.93	-2.31
23.3	21.16	18.24	-2.03
23.4	21.7	18.52	-5.11
23.5	21.42	21	-7.61
23.6	21.14	20.72	-6.5
23.7	19.47	22.94	-5.94
23.8	21.96	23.2	-6.22
23.9	21.95	19.04	-11.25
24	21.11	19.85	-10.42
24.1	21.38	21.8	-9.03
24.2	23.04	22.35	-5.98
24.3	24.7	19.83	-7.64
24.4	24.69	20.39	-11.56
24.5	24.41	21.48	-9.89
24.6	24.12	23.15	-7.12
24.7	25.5	23.42	-6.84
24.8	25.5	18.69	-11
24.9	25.21	18.41	-8.26
25	22.99	17.84	-3.82
25.1	22.7	16.73	0.06
25.2	23.81	13.4	0.34
25.3	22.69	11.72	-4.1
25.4	22.41	14.49	-3.58
25.5	22.12	16.41	-2.19
25.6	22.12	17.8	-3.02
25.7	22.11	17.25	-6.9
25.8	21	18.89	-5.52
25.9	20.15	20	-1.39
26	20.15	20.54	4.44
26.1	23.19	18.32	5.55
26.2	22.08	14.43	1.39
26.3	20.41	13.31	5.27
26.4	18.46	13.31	6.63
26.5	16.79	13.56	7.74
26.6	14.01	13.56	2.46
26.7	12.61	15.78	-0.31
26.8	10.11	16.88	-0.59
26.9	8.99	17.43	1.88
27	12.59	17.13	1.6
27.1	13.7	12.42	-5.06
27.2	12.3	13.25	-5.06
27.3	13.13	14.9	-2.84
27.4	14.79	14.9	-1.21
27.5	13.95	12.38	-3.15
27.6	12	12.66	-5.37
27.7	11.16	14.6	-4.26
27.8	9.49	15.41	-3.43
27.9	11.7	15.14	-3.74
28	11.7	11.23	-10.39
28.1	9.19	12.34	-9.56
28.2	8.35	13.45	-7.34
28.3	7.79	15.93	-6.51
28.4	8.62	15.66	-7.1
28.5	7.23	13.14	-6.82
28.6	7.22	12.86	-2.38
28.7	6.1	11.75	2.89
28.8	4.71	9.79	6.22
28.9	2.76	2.86	4.8
29	1.09	2.84	5.08
29.1	-0.86	4.78	6.47
29.2	-0.87	7	8.13
29.3	-0.87	8.09	5.08
29.4	-3.93	6.98	-1.06
29.5	-6.16	7.24	-2.17
29.6	-8.94	6.68	-0.22
29.7	-9.5	5.85	-0.78
29.8	-10.89	1.67	-3.83
29.9	-10.62	1.12	-6.08
30	-7.85	1.65	-5.53
30.1	-5.92	3.6	-3.86
30.2	-3.15	4.98	-6.08
30.3	-4.54	3.02	-11.63
30.4	-5.94	4.97	-11.39
30.5	-5.94	3.56	-10.83
30.6	-6.23	1.62	-9.44
30.7	-7.9	-3.65	-10
30.8	-7.91	-8.67	-11.66
30.9	-9.58	-10.33	-10.03
31	-10.97	-11.18	-7.53
31.1	-11.53	-12.01	-4.76
31.2	-15.7	-15.9	-10.03
31.3	-19.31	-14.25	-8.09
31.4	-22.1	-12.31	-2.85
31.5	-25.43	-12.05	1.59
31.6	-26.27	-13.16	3.25
31.7	-27.39	-15.93	0.2
31.8	-28.22	-16.51	-0.07
31.9	-28.51	-15.4	-0.11
32	-26.57	-14.86	-0.11
32.1	-25.47	-18.75	-4.82
32.2	-25.2	-17.64	-5.93
32.3	-24.93	-15.16	-3.99
32.4	-25.49	-14.33	-2.91
32.5	-26.33	-16.01	-2.36
32.6	-28.83	-19.62	-5.41
32.7	-32.17	-20.17	-5.13
32.8	-35.5	-19.36	-5.13
32.9	-36.34	-16.86	-5.44
33	-37.73	-17.99	-10.44
33.1	-37.19	-18.82	-13.49
33.2	-35.53	-19.93	-13.49
33.3	-34.7	-21.34	-11.27
33.4	-31.1	-24.11	-11.02
33.5	-33.33	-29.12	-14.63
33.6	-33.89	-28.84	-14.35
33.7	-35.84	-27.18	-12.96
33.8	-37.23	-24.42	-11.3
33.9	-37.52	-25.53	-14.66
34	-37.52	-27.49	-17.43
34.1	-36.97	-28.05	-14.66
34.2	-35.87	-28.05	-11.05
34.3	-30.61	-30.29	-7.72
34.4	-29.5	-36.11	-11.92
34.5	-32.56	-34.19	-13.86
34.6	-36.17	-33.91	-14.14
34.7	-38.96	-32.8	-15.52
34.8	-39.79	-33.65	-16.36
34.9	-41.74	-34.21	-19.16
35	-42.03	-32.28	-17.5
35.1	-42.59	-29.51	-14.72
35.2	-40.38	-26.18	-12.5
35.3	-39.27	-27.31	-15.83
35.4	-41.5	-26.2	-14.48
35.5	-42.61	-25.39	-10.87
35.6	-42.34	-24.83	-9.76
35.7	-41.79	-29.27	-9.21
35.8	-42.36	-35.67	-12.54
35.9	-41.53	-38.17	-10.35
36	-41.26	-39.29	-8.41
36.1	-39.6	-39.29	-7.57
36.2	-39.61	-40.96	-9.52
36.3	-39.61	-38.2	-8.96
36.4	-41.29	-34.6	-5.66
36.5	-43.23	-32.67	-3.45
36.6	-44.07	-33.78	-4.83
36.7	-44.36	-39.05	-12.6
36.8	-44.64	-41.01	-13.43
36.9	-46.03	-41.01	-14.02
37	-44.1	-43.53	-12.36
37.1	-44.11	-46.86	-12.63
37.2	-45.22	-46.03	-14.85
37.3	-47.72	-43.27	-10.97
37.4	-49.12	-39.11	-7.12
37.5	-48.85	-35.8	-6.84
37.6	-51.07	-36.08	-13.77
37.7	-51.64	-32.75	-13.77
37.8	-51.92	-32.49	-15.16
37.9	-51.65	-30.82	-16.58
38	-49.16	-34.73	-21.57
38.1	-48.05	-39.16	-26.57
38.2	-49.45	-41.11	-25.18
38.3	-49.18	-43.07	-20.19
38.4	-46.13	-43.07	-14.67
38.5	-46.42	-47.52	-18.28
38.6	-47.81	-45.86	-17.17
38.7	-49.2	-44.75	-15.78
38.8	-50.32	-42.27	-15.78
38.9	-48.11	-41.72	-17.75
39	-46.73	-43.12	-21.92
39.1	-47.56	-40.63	-20.53
39.2	-49.24	-37.3	-17.75
39.3	-49.24	-33.99	-16.37
39.4	-50.36	-37.04	-20.01
39.5	-52.03	-36.78	-22.22
39.6	-53.15	-35.39	-21.67
39.7	-52.04	-35.39	-20.84
39.8	-49.83	-38.46	-20.01
39.9	-50.39	-44.56	-23.92
40	-52.06	-45.97	-21.98
40.1	-55.68	-44.86	-23.09
40.2	-57.62	-43.75	-22.26
40.3	-59.57	-43.49	-23.37
40.4	-60.97	-41.55	-25.62
40.5	-60.19	-37.68	-22.57
40.6	-60.09	-36.57	-17.02
40.7	-60.99	-36.3	-13.69
40.8	-61.55	-41.03	-17.57
40.9	-59.61	-41.86	-14.27
41	-57.12	-41.88	-10.67
41.1	-56.3	-42.16	-8.45
41.2	-53.53	-45.21	-8.17
41.3	-54.09	-48.28	-11.22
41.4	-54.37	-47.45	-9.04
41.5	-54.93	-46.36	-6.82
41.6	-53.83	-45.8	-6.54
41.7	-55.78	-46.36	-12.36
41.8	-54.95	-42.49	-15.14
41.9	-53.85	-37.78	-17.11
42	-52.47	-36.41	-20.72
42.1	-51.09	-36.69	-24.33
42.2	-51.93	-40.01	-30.98
42.3	-52.49	-39.2	-29.6
42.4	-53.33	-36.98	-27.13
42.5	-52.78	-36.17	-23.53
42.6	-56.12	-40.33	-21.58
42.7	-57.51	-38.94	-19.36
42.8	-57.79	-35.63	-14.93
42.9	-58.08	-33.69	-12.74
43	-54.2	-33.71	-12.46
43.1	-51.71	-38.15	-20.23
43.2	-48.94	-37.31	-21.06
43.3	-47.28	-37.33	-22.17
43.4	-46.18	-37.89	-20.82
43.5	-46.74	-41.24	-21.65
43.6	-51.74	-42.9	-21.65
43.7	-54.52	-42.34	-18.6
43.8	-55.36	-39.59	-14.99
43.9	-55.92	-37.65	-11.14
44	-55.1	-40.72	-13.91
44.1	-52.61	-38.78	-10.3
44.2	-50.67	-36.83	-8.09
44.3	-47.62	-36.3	-7.25
44.4	-44.86	-38.24	-10.61
44.5	-45.97	-40.2	-15.89
44.6	-48.48	-39.37	-17.55
44.7	-49.04	-38.81	-19.21
44.8	-50.15	-36.61	-20.32
44.9	-52.66	-39.66	-25.9
45	-54.05	-36.91	-25.07
45.1	-52.95	-33.3	-22.02
45.2	-53.51	-29.97	-17.3
45.3	-50.46	-30.27	-16.47
45.4	-49.08	-33.87	-20.67
45.5	-50.2	-34.72	-19.28
45.6	-51.04	-36.39	-16.23
45.7	-50.49	-38.33	-14.84
45.8	-50.77	-41.4	-17.61
45.9	-49.95	-38.9	-17.37
46	-48.29	-34.76	-15.7
46.1	-47.19	-30.04	-14.32
46.2	-43.31	-28.1	-14.59
46.3	-39.43	-30.06	-19.87
46.4	-37.5	-28.4	-18.23
46.5	-35.84	-28.14	-16.85
46.6	-31.96	-29.8	-16.85
46.7	-30.86	-32.58	-20.45
46.8	-33.08	-33.43	-24.06
46.9	-36.98	-34.26	-22.43
47	-40.59	-32.89	-19.1
47.1	-42.81	-29.29	-16.88
47.2	-44.21	-32.34	-19.1
47.3	-44.49	-29.31	-18.26
47.4	-46.16	-26.81	-16.35
47.5	-42.84	-24.88	-14.69
47.6	-39.24	-25.72	-15.8
47.7	-38.14	-27.38	-21.63
47.8	-38.42	-26.01	-21.07
47.9	-38.15	-24.63	-19.72
48	-38.71	-23.53	-17.5
48.1	-38.99	-26.86	-18.33
48.2	-39.28	-26.03	-13.89
48.3	-40.67	-24.39	-8.9
48.4	-41.51	-23.28	-4.21
48.5	-39.02	-23.57	-3.66
48.6	-39.03	-27.73	-8.65
48.7	-38.76	-27.18	-8.1
48.8	-38.76	-27.75	-8.37
48.9	-37.94	-28.86	-10.35
49	-36.83	-31.38	-17.56
49.1	-37.95	-29.71	-21.72
49.2	-39.34	-27.77	-21.72
49.3	-42.12	-25.57	-20.89
49.4	-40.19	-25.29	-18.42
49.5	-39.92	-28.92	-20.09
49.6	-42.14	-26.97	-15.93
49.7	-41.04	-23.65	-13.43
49.8	-39.38	-23.11	-9.55
49.9	-37.45	-25.61	-12.07
50	-38.01	-26.46	-15.96
50.1	-37.46	-25.07	-14.85
50.2	-38.02	-24.79	-16.51
50.3	-36.09	-23.98	-17.9
50.4	-36.09	-28.14	-24.59
50.5	-39.15	-26.49	-24.31
50.6	-42.49	-21.78	-22.37
50.7	-41.94	-20.11	-19.32
50.8	-39.17	-20.13	-18.49
50.9	-38.9	-20.69	-20.18
51	-37.24	-19.59	-16.02
51.1	-36.14	-20.15	-12.14
51.2	-33.93	-22.65	-8.53
51.3	-32.82	-30.43	-9.09
51.4	-31.72	-30.99	-6.9
51.5	-32.28	-31.28	-4.96
51.6	-34.23	-31.56	-3.29
51.7	-32.57	-31.84	-4.68
51.8	-35.91	-32.41	-11.62
51.9	-38.97	-29.64	-12.48
52	-38.69	-27.44	-13.87
52.1	-37.31	-25.77	-15.25
52.2	-37.6	-27.71	-19.97
52.3	-35.38	-26.35	-21.36
52.4	-34.56	-25.51	-21.11
52.5	-33.73	-23.59	-18.34
52.6	-31.52	-24.7	-15.56
52.7	-32.08	-27.47	-17.78
52.8	-32.92	-25.27	-15.56
52.9	-31.26	-22.22	-13.1
53	-29.6	-18.91	-13.38
53.1	-30.16	-20.3	-16.71
53.2	-32.39	-21.41	-19.48
53.3	-33.78	-21.7	-18.65
53.4	-35.18	-20.59	-15.63
53.5	-33.24	-21.44	-13.69
53.6	-30.75	-24.5	-16.74
53.7	-27.98	-24.22	-15.07
53.8	-24.94	-25.35	-12.85
53.9	-21.62	-25.35	-11.5
54	-18.29	-28.97	-10.67
54.1	-17.75	-32.02	-13.44
54.2	-18.58	-32.02	-10.39
54.3	-21.36	-29.54	-9.28
54.4	-24.7	-27.88	-9.31
54.5	-29.15	-31.23	-13.47
54.6	-32.2	-29.56	-14.03
54.7	-33.88	-27.34	-10.7
54.8	-33.6	-26.25	-6.81
54.9	-30.01	-25.97	-5.74
55	-27.79	-27.1	-7.96
55.1	-26.69	-24.05	-4.9
55.2	-25.59	-21	-3.79
55.3	-26.15	-19.08	-2.96
55.4	-28.1	-21.3	-7.15
55.5	-30.88	-21.59	-9.1
55.6	-32.82	-21.87	-10.48
55.7	-35.61	-21.87	-9.37
55.8	-35.61	-23.83	-9.65
55.9	-37.01	-26.88	-13.84
56	-37.29	-25.51	-11.07
56.1	-35.63	-23.29	-8.3
56.2	-32.31	-20.24	-7.46
56.3	-29.82	-19.98	-10.24
56.4	-27.33	-21.37	-13.32
56.5	-26.5	-20.83	-12.77
56.6	-27.62	-20	-8.88
56.7	-27.07	-20.28	-6.11
56.8	-28.19	-23.63	-8.61
56.9	-30.14	-20.57	-5.31
57	-31.53	-18.37	-5.03
57.1	-31.81	-16.71	-5.03
57.2	-30.71	-17.54	-8.08
57.3	-29.88	-21.17	-11.69
57.4	-29.34	-22.28	-8.95
57.5	-30.73	-21.46	-7.56
57.6	-30.74	-19.24	-5.34
57.7	-30.19	-20.91	-10.61
57.8	-30.47	-15.93	-10.89
57.9	-30.76	-10.66	-9.53
58	-28.82	-7.63	-7.59
58.1	-25.77	-9.57	-8.42
58.2	-23.01	-12.9	-12.86
58.3	-22.18	-12.36	-12.86
58.4	-20.8	-10.14	-11.23
58.5	-16.92	-7.94	-9.57
58.6	-17.48	-9.33	-11.23
58.7	-19.99	-6.55	-12.06
58.8	-22.21	-3.8	-9.57
58.9	-23.33	-3.24	-7.38
59	-22.5	-5.2	-5.99
59.1	-24.73	-10.75	-12.09
59.2	-25.57	-12.14	-12.09
59.3	-26.41	-13.82	-10.71
59.4	-26.69	-15.21	-10.74
59.5	-27.81	-17.73	-10.74
59.6	-28.65	-18	-12.68
59.7	-29.76	-14.95	-10.74
59.8	-29.21	-10.53	-9.07
59.9	-23.95	-7.2	-7.44
60	-23.12	-9.16	-12.71
60.1	-24.52	-6.66	-10.77
60.2	-24.52	-6.39	-8.27
60.3	-23.14	-8.9	-5.78
60.4	-19.82	-13.06	-6.64
60.5	-18.99	-18.63	-11.64
60.6	-19.28	-21.68	-11.08
60.7	-21.78	-23.07	-10.53
60.8	-19.85	-24.2	-10.25
60.9	-19.58	-27.53	-14.72
61	-20.41	-23.94	-13.61
61.1	-20.98	-17.28	-7.78
61.2	-21.81	-12.29	-1.96
61.3	-20.16	-10.64	-0.01
61.4	-18.78	-12.58	-3.65
61.5	-17.39	-11.49	-3.65
61.6	-17.4	-12.32	-4.21
61.7	-16.58	-13.99	-5.32
61.8	-16.86	-18.17	-10.59
61.9	-18.53	-16.78	-12.29
62	-20.76	-15.14	-9.51
62.1	-20.49	-13.75	-6.46
62.2	-18	-12.08	-4.52
62.3	-17.72	-15.71	-7.29
62.4	-15.51	-14.04	-4.27
62.5	-14.13	-13.79	-2.89
62.6	-11.36	-13.79	-1.5
62.7	-10.54	-16	-4.27
62.8	-11.93	-13.53	-8.16
62.9	-13.6	-9.09	-5.41
63	-13.61	-6.89	-3.75
63.1	-13.06	-4.39	-2.36
63.2	-13.9	-8.83	-5.14
63.3	-13.9	-9.4	-0.7
63.4	-13.64	-11.62	2.04
63.5	-13.92	-13.58	3.71
63.6	-13.37	-16.91	2.6
63.7	-16.43	-18.3	-3.23
63.8	-16.71	-16.65	-2.95
63.9	-15.89	-13.32	-3.26
64	-14.23	-10.84	-3.26
64.1	-14.23	-11.95	-10.19
64.2	-13.96	-8.9	-10.19
64.3	-13.69	-7.26	-7.97
64.4	-15.92	-6.42	-6.62
64.5	-17.59	-8.38	-5.79
64.6	-20.93	-11.44	-8.84
64.7	-22.32	-10.05	-7.73
64.8	-23.71	-6.46	-5.51
64.9	-22.61	-5.63	-2.77
65	-20.12	-9.53	-4.15
65.1	-16.52	-8.42	-3.6
65.2	-15.69	-6.76	-0.83
65.3	-14.31	-7.33	1.67
65.4	-12.38	-9.27	0.53
65.5	-15.16	-13.17	-5.3
65.6	-16	-13.73	-5.57
65.7	-16.56	-10.68	-4.46
65.8	-17.95	-9.31	-3.35
65.9	-18.24	-11.25	-6.44
66	-20.46	-10.16	-10.6
66.1	-21.3	-8.5	-8.1
66.2	-21.86	-5.72	-6.72
66.3	-21.59	-5.46	-6.16
66.4	-21.32	-9.62	-11.74
66.5	-21.05	-9.92	-10.35
66.6	-19.11	-10.75	-8.41
66.7	-19.95	-10.47	-4.53
66.8	-18.29	-9.66	-3.14
66.9	-18.58	-10.77	-4.84
67	-18.31	-9.12	-5.39
67.1	-17.48	-8.01	-4.28
67.2	-14.44	-9.68	-5.95
67.3	-14.44	-14.69	-13.16
67.4	-13.9	-15.25	-13.19
67.5	-15.01	-16.1	-11.8
67.6	-16.68	-14.15	-8.75
67.7	-15.3	-13.32	-6.53
67.8	-15.86	-16.39	-7.64
67.9	-15.59	-14.45	-5.18
68	-15.6	-11.69	-1.02
68.1	-13.94	-10.86	3.14
68.2	-15.61	-11.42	0.93
68.3	-18.39	-10.88	-0.46
68.4	-19.23	-9.77	0.62
68.5	-21.73	-8.68	0.89
68.6	-19.52	-8.68	0.06
68.7	-19.81	-13.67	-6.87
68.8	-19.53	-13.69	-6.32
68.9	-20.93	-12.86	-3.85
69	-19.55	-12.05	-1.08
69.1	-19.55	-14.54	1.42
69.2	-19.28	-15.1	-0.25
69.3	-17.07	-12.9	1.42
69.4	-15.14	-10.68	1.94
69.5	-11.81	-10.14	0.27
69.6	-11.82	-14.02	-5
69.7	-12.38	-12.08	-3.05
69.8	-14.05	-11.27	0.55
69.9	-14.61	-9.6	4.96
70	-14.06	-11.56	6.07
70.1	-14.63	-12.95	4.13
70.2	-17.41	-12.95	7.46
70.3	-17.97	-12.97	9.95
70.4	-18.53	-13.53	11.59
70.5	-20.48	-17.98	7.15
70.6	-19.93	-14.1	4.65
70.7	-19.1	-9.1	5.2
70.8	-18.83	-3.85	5.76
70.9	-15.23	-3.02	4.9
71	-12.74	-4.43	-0.38
71.1	-12.75	-3.87	0.46
71.2	-12.48	-5.26	1.57
71.3	-10.26	-5.55	3.23
71.4	-9.44	-8.88	-0.13
71.5	-10.28	-8.35	-4.01
71.6	-12.23	-6.4	-2.07
71.7	-13.9	-3.08	-0.96
71.8	-13.35	-3.37	-0.96
71.9	-13.08	-8.09	-5.71
72	-13.36	-5.33	-4.05
72.1	-14.76	-2.56	-0.72
72.2	-14.48	-0.06	3.44
72.3	-13.94	1.03	2.61
72.4	-16.72	4.08	0.64
72.5	-15.61	5.73	3.69
72.6	-12.85	4.9	4.52
72.7	-7.3	2.68	3.41
72.8	-5.37	-3.17	-2.41
72.9	-6.49	-4.28	-3.28
73	-8.16	-3.74	-0.23
73.1	-9.55	-2.35	3.1
73.2	-9.56	-2.91	4.21
73.3	-12.06	-2.09	1.99
73.4	-12.34	0.4	5.01
73.5	-10.41	-1	6.4
73.6	-7.36	-1.28	6.12
73.7	-9.03	-6.27	1.41
73.8	-11.26	-5.18	0.3
73.9	-13.76	-3.8	1.65
74	-14.88	-2.71	2.48
74.1	-11.83	-2.98	2.21
74.2	-9.34	-4.09	-1.95
74.3	-8.79	-3	2.21
74.4	-7.14	-1.89	6.89
74.5	-6.03	-3.57	9.67
74.6	-6.04	-8.01	8.83
74.7	-5.77	-6.9	8.56
74.8	-6.33	-6.37	9.67
74.9	-7.45	-4.43	11.02
75	-6.07	-2.22	9.63
75.1	-8.57	-3.89	4.09
75.2	-10.52	-2.78	4.36
75.3	-12.74	-1.69	4.64
75.4	-12.2	-1.41	3.78
75.5	-12.48	-3.93	0.72
75.6	-14.71	-2.82	-2.6
75.7	-14.16	-0.6	-2.33
75.8	-13.33	1.33	-3.99
75.9	-12.51	4.38	-2.91
76	-13.62	-0.08	-7.35
76.1	-13.07	-0.91	-4.86
76.2	-12.8	-0.08	-1.53
76.3	-11.42	1.01	0.14
76.4	-8.38	1.85	-2.11
76.5	-7.83	2.66	-6.83
76.6	-6.73	4.32	-4.61
76.7	-5.62	5.43	-1.28
76.8	-4.24	5.69	1.77
76.9	-5.91	4.31	-0.48
77	-7.31	4.29	0.91
77.1	-10.36	5.67	3.68
77.2	-14.53	6.23	4.79
77.3	-15.37	5.66	3.96
77.4	-16.77	2.33	-1.62
77.5	-17.88	2.03	-1.62
77.6	-15.11	3.14	-0.24
77.7	-12.9	3.69	-0.24
77.8	-10.96	1.18	-3.84
77.9	-8.48	0.62	-6.65
78	-7.09	1.44	-4.98
78.1	-6.82	3.1	-2.49
78.2	-7.38	3.94	-0.55
78.3	-7.67	1.42	-3.87
78.4	-9.89	2.25	0.26
78.5	-10.73	3.34	4.14
78.6	-10.18	3.9	6.36
78.7	-12.41	2.79	4.42
78.8	-14.91	2.77	-1.41
78.9	-15.75	4.99	-2.55
79	-16.04	6.91	-2.27
79.1	-13.82	6.36	-0.89
79.2	-10.78	1.36	-5.05
79.3	-9.4	4.4	-2.83
79.4	-8.57	6.06	-1.2
79.5	-6.64	6.04	0.19
79.6	-5.26	4.38	-1.2
79.7	-6.65	0.22	-5.36
79.8	-7.76	-2.57	-4.25
79.9	-9.16	-3.13	-2.61
80	-10.83	-3.7	-1.5
80.1	-10	-8.42	-6.5
80.2	-10.01	-7.31	-7.33
80.3	-10.85	-4.83	-3.72
80.4	-8.92	-2.61	-3.2
80.5	-5.59	-4.02	-4.31
80.6	-6.15	-6.24	-9.3
80.7	-8.1	-5.4	-7.64
80.8	-10.05	-4.87	-3.48
80.9	-11.17	-0.71	-0.74
81	-11.17	-4.05	-0.74
81.1	-9.51	-4.05	0.1
81.2	-8.13	-1.56	3.98
81.3	-8.14	-0.19	8.14
81.4	-3.71	-0.19	8.94
81.5	-3.99	-3.26	4.23
81.6	-5.39	-2.15	5.34
81.7	-6.23	-0.48	7
81.8	-6.79	0.05	7.55
81.9	-10.68	-2.72	4.19
82	-13.46	-3.57	-0.52
82.1	-16.52	-1.91	1.14
82.2	-18.19	0.87	4.19
82.3	-16.53	2.51	5.86
82.4	-14.04	-0.26	0.55
82.5	-13.77	2.22	2.77
82.6	-12.66	3.05	5.83
82.7	-8.51	3.33	6.66
82.8	-5.74	0.26	3.61
82.9	-7.41	-2.52	-0.59
83	-7.42	-3.09	-0.03
83.1	-7.98	-2.81	1.36
83.2	-7.99	-3.37	2.47
83.3	-8.55	-6.72	-1.7
83.4	-10.22	-3.67	-2.84
83.5	-10.5	0.75	-0.9
83.6	-10.79	5.19	2.43
83.7	-7.19	6.58	3.27
83.8	-7.19	3.79	0.21
83.9	-6.92	4.34	1.29
84	-6.65	5.16	3.51
84.1	-6.38	6.82	5.18
84.2	-7.22	3.49	2.68
84.3	-10	4.86	0.46
84.4	-11.4	5.69	2.92
84.5	-13.07	4.84	5.42
84.6	-10.58	3.46	6.53
84.7	-10.58	-1.26	3.2
84.8	-10.03	-0.45	5.7
84.9	-7.27	-0.45	5.11
85	-6.72	-0.47	4.83
85.1	-8.67	-3.52	-0.71
85.2	-10.61	-2.41	-5.71
85.3	-12.56	-0.76	-4.88
85.4	-13.68	2.01	-1.02
85.5	-11.19	2.27	0.92
85.6	-11.19	-2.72	-2.97
85.7	-11.76	-1.06	0.64
85.8	-10.93	0.31	1.2
85.9	-9.27	0.31	2.27
86	-7.61	-0.82	1.44
86.1	-8.18	-3.31	-0.5
86.2	-7.91	-2.2	0.89
86.3	-8.47	0	2.55
86.4	-9.03	0	2.8
86.5	-8.48	-3.63	-2.75
86.6	-10.15	-1.41	-2.75
86.7	-10.99	0.26	-0.81
86.8	-9.33	2.18	3.63
86.9	-6.84	3.01	7.2
87	-5.18	1.33	6.09
87.1	-4.36	2.99	9.7
87.2	-3.53	5.21	13.03
87.3	-3.54	5.75	14.42
87.4	-3.54	1.86	9.95
87.5	-6.05	2.68	7.45
87.6	-7.16	3.51	6.89
87.7	-8.28	5.18	6.89
87.8	-7.73	5.99	6.34
87.9	-9.4	4.88	2.42
88	-10.8	7.64	3.81
88.1	-11.91	10.96	4.37
88.2	-10.81	12.35	5.2
88.3	-9.43	9.56	3.53
88.4	-6.38	8.17	0.45
88.5	-3.89	7.04	2.39
88.6	-0.57	7.04	3.22
88.7	4.42	3.71	3.78
88.8	5.52	-2.68	-0.94
88.9	4.68	-2.96	0.42
89	3.29	-1.32	0.97
89.1	0.51	2.01	2.64
89.2	-2.27	3.4	0.14
89.3	-4.5	4.77	-6.24
89.4	-6.73	9.21	-6.83
89.5	-8.95	9.74	-6
89.6	-7.57	9.19	-5.72
89.7	-7.58	3.09	-9.88
89.8	-7.86	2.51	-6.83
89.9	-8.42	2.24	-1.31
90	-10.65	1.66	3.96
90.1	-10.38	1.38	5.9
90.2	-10.66	-3.33	1.46
90.3	-11.22	-3.07	2.85
90.4	-12.06	-3.91	2.54
90.5	-10.13	-2.26	1.99
90.6	-7.64	-4.76	-3.01
90.7	-4.59	-3.09	-4.67
90.8	-2.1	0.5	-3.56
90.9	-0.17	2.44	-3.04
91	2.33	1.59	-2.76
91.1	1.49	-3.96	-5.54
91.2	1.48	-5.35	-2.21
91.3	-0.47	-4.26	0.84
91.4	-2.14	-2.04	2.48
91.5	-4.37	-3.44	1.09
91.6	-5.48	-4	-1.41
91.7	-6.88	-1.5	2.48
91.8	-6.05	0.7	4.7
91.9	-5.5	2.36	4.94
92	-5.51	-0.71	0.23
92.1	-5.51	2.9	-0.88
92.2	-4.69	4.84	1.06
92.3	-3.58	7.32	1.89
92.4	-2.21	7.32	1.03
92.5	-2.77	5.92	-4.24
92.6	-6.38	6.47	-1.47
92.7	-10.27	7.86	1.03
92.8	-11.39	8.95	4.36
92.9	-12.23	5.62	1.83
93	-11.4	9.21	5.99
93.1	-9.74	12.82	7.93
93.2	-8.08	14.76	9.04
93.3	-4.2	13.63	6.82
93.4	-4.77	10.58	0.69
93.5	-5.33	10.56	0.96
93.6	-6.17	9.17	2.9
93.7	-5.06	8.06	3.46
93.8	-4.79	1.11	-0.98
93.9	-5.35	0.55	-2.4
94	-5.36	0.53	-0.73
94.1	-5.37	2.48	-1.57
94.2	-3.99	3.59	-2.95
94.3	-6.21	1.35	-9.33
94.4	-5.94	3.29	-11.03
94.5	-6.23	4.66	-10.2
94.6	-3.74	6.6	-8.53
94.7	-0.41	3.83	-11.59
94.8	1.25	4.09	-12.97
94.9	2.63	3.53	-8.57
95	6.23	3.79	-4.68
95.1	8.72	4.34	-2.46
95.2	6.77	1.29	-4.4
95.3	3.16	2.94	-1.91
95.4	-0.18	7.38	2.5
95.5	-3.79	11.24	4.16
95.6	-2.69	11.8	3.61
95.7	-5.19	9.86	-0.55
95.8	-7.42	10.12	0
95.9	-8.54	9.84	-0.31
96	-6.6	10.1	-1.69
96.1	-7.72	5.66	-7.52
96.2	-7.17	6.77	-7.52
96.3	-4.95	7.86	-4.75
96.4	-2.47	8.41	-1.73
96.5	0.86	6.45	1.6
96.6	2.79	1.46	0.22
96.7	4.17	1.18	3.55
96.8	2.23	-1.06	7.71
96.9	0	-1.89	11.56
97	-3.61	-4.96	9.89
97.1	-8.34	-1.63	9.06
97.2	-11.4	3.36	9.89
97.3	-12.23	5.29	9.62
97.4	-11.13	6.4	6.53
97.5	-11.69	3.6	-1.79
97.6	-9.76	4.44	-0.12
97.7	-6.16	6.1	2.37
97.8	-1.45	6.92	7.09
97.9	1.6	4.97	8.44
98	2.42	6.62	7.61
98.1	3.53	7.73	7.61
98.2	4.91	8.56	7.06
98.3	4.9	8.54	5.11
98.4	2.95	2.72	-2.96
98.5	0.45	1.59	-4.63
98.6	-4	1.31	-4.07
98.7	-7.89	1.31	-3.24
98.8	-7.06	1.02	-2.69
98.9	-7.9	0.74	-4.1
99	-9.01	1.83	-1.05
99.1	-8.47	4.05	2.83
99.2	-8.47	6.82	5.88
99.3	-10.42	5.14	3.94
99.4	-9.6	7.91	6.41
99.5	-7.94	10.95	8.63
99.6	-6.83	14	10.57
99.7	-3.51	15.39	10.01
99.8	-3.8	12.32	6.41
99.9	-4.64	12.87	5.82
100	-5.2	13.96	3.32
100.1	-6.04	12.85	0.83
100.2	-9.93	6.75	-4.45
100.3	-11.87	3.96	-6.39
100.4	-12.44	3.4	-5.03
100.5	-14.94	2.55	-1.98
100.6	-12.45	1.72	-0.04
100.7	-11.62	-1.33	-5.03
100.8	-10.24	0.87	-5.03
100.9	-8.31	3.64	-4.79
101	-5.26	5.29	-4.23
101.1	-5.55	3.35	-3.68
101.2	-6.94	1.96	-5.62
101.3	-7.78	1.94	-2.29
101.4	-6.12	3.61	3.5
101.5	-3.35	4.97	7.11
101.6	-3.36	1.09	3.23
101.7	-3.92	1.37	3.23
101.8	-5.59	1.35	2.67
101.9	-4.49	2.18	3.19
102	-3.38	0.78	0.7
102.1	-5.06	-1.17	-3.74
102.2	-5.34	-0.89	-0.69
102.3	-5.62	-0.08	1.81
102.4	-7.02	3.25	2.61
102.5	-6.75	1.29	-1.83
102.6	-5.09	4.07	-0.72
102.7	-4.82	7.12	3.72
102.8	-3.71	11.26	7.88
102.9	-0.95	13.2	7.85
103	-0.95	12.63	3.69
103.1	-3.73	14.02	4.24
103.2	-4.85	13.19	4.52
103.3	-3.75	10.95	3.96
103.4	-4.86	5.12	0.05
103.5	-5.42	2.88	-0.79
103.6	-5.15	3.16	0.32
103.7	-5.44	4.83	1.71
103.8	-4.06	2.59	1.16
103.9	-5.45	-0.46	-4.98
104	-6.57	2.02	-3.31
104.1	-7.41	5.07	-1.93
104.2	-5.75	7.84	1.12
104.3	-5.75	5.88	1.68
104.4	-4.93	5.05	1.65
104.5	-3.82	5.86	4.98
104.6	-4.66	8.64	7.2
104.7	-4.12	10.02	8.86
104.8	-6.62	5.29	4.42
104.9	-8.29	5.57	5.5
105	-11.07	7.21	6.89
105.1	-11.08	6.66	7.16
105.2	-10.53	3.05	4.39
105.3	-9.7	2.2	0.78
105.4	-8.6	3.03	2.14
105.5	-5.55	4.96	2.97
105.6	-1.95	7.18	6.02
105.7	-0.02	5.23	1.03
105.8	-0.86	8.27	0.75
105.9	-3.64	11.87	-0.11
106	-3.92	13.24	-0.94
106.1	-2.26	10.75	-3.16
106.2	-4.21	8.8	-6.49
106.3	-4.77	8.51	-2.89
106.4	-3.67	7.4	0.41
106.5	-1.18	5.16	4.29
106.6	0.76	1	3.18
106.7	0.47	2.11	2.63
106.8	-1.48	2.64	5.4
106.9	-3.98	1.53	8.15
107	-1.49	-0.7	9.81
107.1	-2.88	-5.42	3.71
107.2	-5.67	-3.2	4.82
107.3	-5.95	-1	3.99
107.4	-3.46	0.94	3.12
107.5	-3.46	1.48	-0.76
107.6	-2.64	6.2	-3.81
107.7	-1.26	12.3	-1.87
107.8	-1.54	18.11	2.29
107.9	0.39	18.66	4.48
108	-0.45	13.93	0.31
108.1	-2.67	12.54	3.64
108.2	-6.56	11.43	3.37
108.3	-5.46	8.64	3.37
108.4	-2.97	4.48	1.67
108.5	-4.64	1.96	-1.38
108.6	-3.26	1.13	0.84
108.7	-4.65	-0.54	5.55
108.8	-5.49	-0.56	8.61
108.9	-5.5	-4.99	5.24
109	-5.5	-1.96	7.74
109.1	-5.23	0.54	10.79
109.2	-4.13	3.59	12.74
109.3	-1.64	3.85	11.07
109.4	-2.2	2.74	5.77
109.5	-2.76	4.11	5.77
109.6	0.01	3.55	5.49
109.7	0.28	3	7.15
109.8	-0.01	-0.91	4.94
109.9	0.82	-0.35	6.29
110	0.81	-1.2	10.73
110.1	0.8	1.02	14.06
110.2	5.24	2.96	12.95
110.3	5.51	2.94	5.18
110.4	5.78	7.38	3.48
110.5	5.5	9.58	-0.4
110.6	5.21	8.47	-1.23
110.7	3.26	4.03	-2.9
110.8	0.21	0.96	-4.28
110.9	-2.85	-1.54	-1.26
111	-4.52	-2.66	3.18
111.1	-5.09	-2.11	5.67
111.2	-7.04	-5.44	1.79
111.3	-8.71	-2.13	3.73
111.4	-8.99	2.03	7.3
111.5	-9.27	4.24	9.52
111.6	-8.17	3.68	10.08
111.7	-9.01	2.02	6.75
111.8	-7.35	1.44	8.97
111.9	-5.97	1.72	11.99
112	-3.2	3.09	14.76
112.1	0.12	0.59	8.38
112.2	0.95	3.92	6.72
112.3	-0.17	6.12	5.89
112.4	-0.18	6.68	4.47
112.5	2.59	7.21	0.86
112.6	0.92	5.27	-3.86
112.7	0.08	5.83	-3.02
112.8	-0.2	8.03	-0.53
112.9	0.07	8.58	3.6
113	-1.05	4.96	2.77
113.1	-0.22	6.07	3.05
113.2	-1.06	9.4	6.65
113.3	-3.29	10.76	9.15
113.4	-0.8	10.21	9.12
113.5	-1.64	4.37	4.4
113.6	-1.92	3.53	4.96
113.7	-0.82	3.26	4.96
113.8	-0.27	3.51	5.24
113.9	-1.39	0.46	2.15
114	0.55	-0.39	-1.18
114.1	-1.67	1.83	0.21
114.2	-4.46	4.61	1.87
114.3	-3.35	6.53	1.87
114.4	-3.91	2.65	-4.54
114.5	-4.47	4.29	-3.43
114.6	-4.76	4.57	-0.1
114.7	-2.55	5.68	4.34
114.8	0.5	3.16	6.56
114.9	0.21	2.05	5.42
115	-0.35	4.81	7.08
115.1	-1.74	7.86	9.02
115.2	-0.91	10.91	9.02
115.3	-0.92	6.73	2.64
115.4	-2.32	6.18	2.89
115.5	-2.6	4.22	3.44
115.6	0.45	1.17	4.83
115.7	3.49	-2.44	3.17
115.8	4.32	-6.34	-3.22
115.9	4.59	-5.79	-3.8
116	4.58	-4.14	-3.25
116.1	4.85	-2.76	-2.69
116.2	4.85	-5.25	-3.8
116.3	3.73	-3.61	-1.03
116.4	2.06	-0.83	5.32
116.5	1.78	0.81	10.04
116.6	4.54	0.54	12.26
116.7	4.54	-3.07	8.37
116.8	4.53	-1.7	9.21
116.9	5.36	0.24	10.28
117	5.07	1.61	12.5
117.1	4.79	0.22	10.01
117.2	2.01	0.5	7.79
117.3	0.06	1.87	9.45
117.4	-0.78	3.81	10.53
117.5	1.71	4.9	11.08
117.6	1.15	0.74	7.75
117.7	-0.24	2.41	8.59
117.8	-1.91	4.61	9.42
117.9	-3.03	5.72	11.05
118	-1.65	4.03	11.33
118.1	-2.77	4.03	9.11
118.2	-3.88	6.53	12.16
118.3	-3.89	6.51	14.38
118.4	-2.51	6.23	13.24
118.5	-3.9	1.78	6.3
118.6	-4.46	1.22	4.64
118.7	-3.64	1.22	5.75
118.8	-2.53	1.48	6.86
118.9	-0.88	1.2	5.99
119	0.23	-1.31	1.55
119.1	0.77	0.07	2.66
119.2	3.54	2.29	3.22
119.3	4.92	4.77	4.61
119.4	4.92	3.39	2.36
119.5	1.86	4.75	3.74
119.6	-0.92	6.14	5.13
119.7	-2.04	5.86	8.46
119.8	-1.77	1.68	9.29
119.9	-2.89	-5.53	4.27
120	-3.17	-6.93	4.54
120.1	-3.73	-8.6	5.1
120.2	-3.46	-9.15	3.43
120.3	-2.63	-11.11	1.21
120.4	-2.92	-8.34	0.35
120.5	-2.09	-3.92	5.9
120.6	-0.43	-0.31	11.72
120.7	3.17	2.74	13.11
120.8	2.05	0.22	9.23
120.9	1.49	-1.44	9.47
121	0.65	-0.63	8.64
121.1	-0.19	-0.63	9.47
121.2	0.36	-1.74	8.64
121.3	0.35	-2.03	3.37
121.4	-0.49	-0.09	3.06
121.5	-1.88	1.55	3.89
121.6	-3	2.39	4.17
121.7	-5.22	-1.5	1.12
121.8	-7.72	0.43	2.78
121.9	-9.4	0.98	7.19
122	-12.18	2.07	10.52
122.1	-12.74	-0.15	9.96
122.2	-11.91	-3.75	5.52
122.3	-9.14	-3.22	4.97
122.4	-6.1	-2.94	3.83
122.5	-1.11	-1.29	3
122.6	1.66	-4.35	-1.44
122.7	1.09	-3.24	-3.66
122.8	1.64	-3.25	-3.66
122.9	1.08	-4.36	-3.42
123	1.35	-2.72	-2.86
123.1	-2.54	-4.38	-8.41
123.2	-3.38	-2.72	-5.91
123.3	-4.49	0.04	-3.14
123.4	-0.89	1.98	-0.12
123.5	2.71	-0.53	-0.4
123.6	4.37	-0.26	-3.17
123.7	6.02	2.79	-0.95
123.8	6.85	5.83	-0.12
123.9	7.95	7.49	1.51
124	5.45	3.03	-5.15
124.1	3.22	2.2	-4.87
124.2	-1.5	3.03	-5.15
124.3	-4.56	3.02	-4.87
124.4	-4.29	0.52	-5.45
124.5	-5.68	-1.16	-9.34
124.6	-8.74	0.22	-6.56
124.7	-10.41	2.72	-5.18
124.8	-9.31	6.03	-4.9
124.9	-10.7	3.53	-9.37
125	-11.54	5.18	-7.15
125.1	-11.82	5.46	-4.1
125.2	-11.83	7.95	1.17
125.3	-7.12	7.66	2
125.4	-4.35	2.94	-1.36
125.5	-3.25	2.09	0.31
125.6	-2.7	0.15	0.86
125.7	-1.88	-0.13	0.31
125.8	-2.99	-4.31	-4.41
125.9	-3.55	-2.64	-6.94
126	-3.84	-0.44	-5.55
126.1	-4.95	1.22	-3.05
126.2	-3.02	1.22	-3.05
126.3	-1.64	-1.85	-6.94
126.4	-0.53	0.09	-3.36
126.5	-0.82	2.02	0.52
126.6	1.12	2.3	3.02
126.7	1.11	0.35	3.02
126.8	-0.28	1.44	0.52
126.9	-1.68	2.28	2.15
127	-0.85	4.2	3.26
127.1	1.92	3.92	4.93
127.2	3.85	-0.79	0.21
127.3	5.79	3.07	1.32
127.4	3.56	6.12	2.12
127.5	3.28	7.77	1.01
127.6	5.21	6.11	-0.93
127.7	2.71	4.72	-2.32
127.8	0.21	4.98	0.73
127.9	-0.08	4.42	2.65
128	-0.36	3.85	3.2
128.1	-2.59	-1.42	-1.52
128.2	-3.7	-0.87	-4.85
128.3	-5.09	2.44	-4.57
128.4	-5.94	5.5	-3.49
128.5	-1.5	2.7	-3.77
128.6	0.16	-0.07	-5.99
128.7	2.37	-0.63	0.39
128.8	3.75	-1.2	5.39
128.9	6.24	-0.09	7.3
129	5.96	-4.27	5.63
129.1	4.84	-3.99	2.86
129.2	4.28	-2.61	2.03
129.3	2.61	0.15	4.25
129.4	3.43	-0.4	6.43
129.5	2.87	-3.75	1.44
129.6	2.03	-1.81	3.94
129.7	2.3	0.69	6.99
129.8	6.46	2.89	10.59
129.9	8.67	2.89	9.73
130	8.39	4.26	10.84
130.1	9.49	5.64	13.61
130.2	9.48	4.53	14.72
130.3	12.25	3.41	15
130.4	11.69	-2.42	8.31
130.5	10.58	-3.27	8.59
130.6	8.63	-3.83	8.03
130.7	6.95	-1.88	5.54
130.8	6.67	-1.35	1.38
130.9	3.61	0.87	-3.37
131	4.16	4.74	-1.71
131.1	3.04	7.23	1.07
131.2	1.1	9.73	2.73
131.3	-0.3	6.66	0.79
131.4	-0.58	6.11	2.98
131.5	-1.97	6.37	4.92
131.6	-0.87	5.81	5.75
131.7	2.45	2.2	2.42
131.8	2.45	-2.25	-3.96
131.9	2.16	-1.98	-3.99
132	2.99	-1.99	-3.71
132.1	1.59	-2.55	-1.77
132.2	-0.08	-4.49	-3.99
132.3	0.47	-0.9	-5.1
132.4	-0.37	4.37	-2.64
132.5	-1.48	8.79	1.53
132.6	0.73	8.51	4.3
132.7	0.17	4.9	0.69
132.8	-1.78	5.16	2.36
132.9	-1.51	4.89	4.82
133	0.15	4.03	5.38
133.1	-2.08	1.26	3.44
133.2	-4.03	-0.4	0.38
133.3	-4.31	-2.36	-1
133.4	-3.21	-1.25	0.35
133.5	0.67	0.11	0.07
133.6	3.99	-3.22	-5.75
133.7	5.37	-0.16	-3.81
133.8	3.98	3.98	-2.42
133.9	4.53	5.09	-0.79
134	6.46	3.96	-1.34
134.1	5.62	3.41	-4.67
134.2	5.89	2.3	-4.67
134.3	4.5	3.11	-1.62
134.4	5.05	3.39	1.4
134.5	5.32	0.32	-1.93
134.6	3.93	0.32	-1.1
134.7	1.7	1.15	2.51
134.8	-0.8	1.96	5.56
134.9	0.3	0.58	4.14
135	-0.54	-3.05	-1.13
135.1	-0.27	-4.71	0.53
135.2	-0.55	-4.71	0.81
135.3	0.28	-4.45	1.37
135.4	-0.01	-7.23	-2.27
135.5	0.82	-8.08	-6.71
135.6	1.09	-6.41	-6.99
135.7	0.8	-1.98	-5.88
135.8	3.02	0.78	-7.27
135.9	2.45	0.5	-10.9
136	1.62	1.87	-5.91
136.1	2.72	2.15	-1.19
136.2	4.38	2.15	4.35
136.3	4.37	-1.2	5.19
136.4	4.92	-0.64	3.21
136.5	4.64	1.28	6.54
136.6	2.69	5.44	8.21
136.7	3.24	6.83	8.48
136.8	2.12	4.04	2.1
136.9	1	5.14	2.35
137	1.83	7.35	3.74
137.1	4.6	9.84	4.85
137.2	7.64	10.12	5.4
137.3	9.86	8.44	2.63
137.4	10.68	8.44	3.98
137.5	9.29	8.97	6.2
137.6	10.11	9.25	7.03
137.7	9.27	2.32	1.76
137.8	7.33	2.85	0.37
137.9	2.6	3.68	0.34
138	-0.46	6.16	0.06
138.1	-0.74	4.5	-0.21
138.2	-2.13	0.06	-2.71
138.3	-1.03	0.6	-1.04
138.4	1.18	2.54	1.42
138.5	2.84	2.8	1.98
138.6	1.17	0.3	-3.02
138.7	-0.78	3.07	-5.24
138.8	-2.45	5.83	-1.63
138.9	-2.73	7.49	2.78
139	0.59	5.81	4.72
139.1	-1.36	2.76	1.94
139.2	-3.31	2.76	4.44
139.3	-3.31	2.19	5.83
139.4	-3.6	1.91	6.63
139.5	-2.5	-0.05	3.58
139.6	-2.22	-1.16	-2.81
139.7	-1.95	0.23	-2.53
139.8	-0.02	1.87	-3.08
139.9	4.14	1.87	-4.22
140	5.52	-0.37	-7.55
140.1	4.12	3.52	-3.39
140.2	3.28	6.85	0.77
140.3	3	8.22	3.54
140.4	3.55	6.55	3.51
140.5	0.21	1.82	-0.09
140.6	-1.73	-0.4	-1.2
140.7	-3.68	-0.68	-1.76
140.8	-2.3	0.13	-2.87
140.9	-0.92	-2.09	-8.45
141	-1.76	2.06	-7.89
141.1	-2.88	5.66	-3.46
141.2	-2.05	7.05	0.15
141.3	-0.11	5.92	0.98
141.4	0.43	3.43	-2.93
141.5	-0.96	4.52	-1.82
141.6	-1.8	7.85	-0.71
141.7	-3.19	8.4	-1.27
141.8	-4.31	6.44	-6.26
141.9	-4.32	9.21	-9.35
142	-6.26	11.42	-7.68
142.1	-6.83	10.86	-5.46
142.2	-4.34	6.7	-4.91
142.3	-4.34	0.3	-7.4
142.4	-3.79	-1.09	-3.55
142.5	-2.14	-1.11	1.44
142.6	-1.03	0.56	5.88
142.7	0.07	-1.11	6.16
142.8	1.73	0.26	4.77
142.9	1.72	4.98	5.85
143	1.72	8.57	5.85
143.1	2.54	7.18	4.74
143.2	0.87	3.57	-1.92
143.3	-1.35	3.28	-1.64
143.4	-1.92	1.89	-0.56
143.5	-1.09	2.15	2.77
143.6	-1.65	0.21	5.54
143.7	-1.66	-0.07	4.99
143.8	-2.5	1.58	6.09
143.9	-2.78	3.52	6.06
144	-0.29	4.33	4.4
144.1	1.09	1	-3.37
144.2	2.75	1.56	-4.76
144.3	4.13	2.65	-4.48
144.4	6.62	3.2	-4.51
144.5	9.66	3.74	-4.79
144.6	10.49	1.8	-9.51
144.7	9.65	4.3	-8.12
144.8	7.43	5.11	-6.45
144.9	5.75	5.66	-4.54
145	5.75	2.04	-7.04
145.1	5.46	1.21	-7.32
145.2	5.18	1.21	-3.71
145.3	6.84	1.74	1.01
145.4	9.33	1.74	2.36
145.5	10.71	-2.71	-0.97
145.6	13.75	-2.99	-0.41
145.7	14.3	-1.6	-0.69
145.8	13.46	0.6	0.14
145.9	14.57	-0.79	-3.77
146	14.56	0.3	-7.38
146.1	14	1.69	-6.55
146.2	13.71	5.29	-5.16
146.3	14.82	7.5	-4.88
146.4	13.7	3.89	-10.19
146.5	13.42	3.87	-9.08
146.6	13.13	3.59	-7.14
146.7	13.4	4.15	-4.08
146.8	13.95	1.91	-3.25
146.9	12.84	-0.86	-5.5
147	9.5	-0.61	-3.28
147.1	7	-0.61	-0.51
147.2	7.27	-0.88	1.99
147.3	6.43	-5.34	-0.79
147.4	6.14	-5.06	1.12
147.5	6.69	-3.42	1.4
147.6	6.97	-1.2	3.62
147.7	9.18	-0.64	3.07
147.8	9.45	-3.71	-3.32
147.9	10	-2.88	-4.46
148	8.6	-0.12	-4.73
148.1	8.04	2.65	-4.73
148.2	6.37	2.65	-6.68
148.3	2.76	4.02	-5.01
148.4	3.03	5.96	-0.33
148.5	4.13	6.22	3.83
148.6	6.07	5.11	6.61
148.7	6.62	-0.16	3.56
148.8	8	-0.46	2.72
148.9	9.65	0.37	1.86
149	11.59	0.36	3.52
149.1	12.97	-4.64	0.2
149.2	13.52	-5.47	-1.75
149.3	12.68	-3.55	3.52
149.4	13.23	-2.99	6.27
149.5	15.44	-1.9	9.04
149.6	14.05	-5.23	4.88
149.7	10.16	-4.4	5.16
149.8	5.16	-3.31	5.71
149.9	3.21	-0.53	5.96
150	5.42	-2.49	4.29
150.1	4.86	-4.43	-0.98
150.2	4.58	-1.94	-0.7
150.3	3.74	-1.4	0.69
150.4	4.56	0.26	2.6
150.5	4.28	-3.08	0.93
150.6	2.89	-1.42	0.1
150.7	2.32	-0.03	2.04
150.8	1.49	2.17	5.65
150.9	4.53	1.61	7
151	3.97	-0.62	3.4
151.1	3.41	1.04	3.95
151.2	1.74	1.87	5.89
151.3	2.56	-0.09	4.51
151.4	0.61	-4.25	0.31
151.5	0.05	-3.99	-3.29
151.6	1.71	-4.27	-3.02
151.7	3.09	-3.99	-0.52
151.8	5.58	-3.73	0.87
151.9	6.13	-5.95	-2.49
152	5.29	-4.3	0.28
152.1	5.29	-2.36	3.33
152.2	5.28	-1.81	6.11
152.3	7.21	-5.43	4.44
152.4	6.93	-5.99	1.36
152.5	6.65	-4.9	1.91
152.6	7.75	-4.06	4.41
152.7	9.13	-3.51	5.52
152.8	8.29	-5.19	1.36
152.9	7.45	-2.14	3.55
153	8	1.17	6.04
153.1	9.38	2.84	7.99
153.2	11.87	4.5	6.6
153.3	10.2	3.93	2.16
153.4	7.97	6.15	1.57
153.5	7.14	8.07	-0.65
153.6	5.19	9.46	-0.65
153.7	2.41	5.85	-5.36
153.8	2.96	7.22	-3.7
153.9	3.5	8.61	-1.79
154	4.88	10.25	0.15
154.1	9.59	8.59	-0.12
154.2	10.42	4.98	-1.79
154.3	7.36	4.96	2.65
154.4	5.41	3.3	5.12
154.5	3.19	1.06	7.06
154.6	-0.15	-3.38	3.45
154.7	-3.48	-3.93	1.79
154.8	-4.88	-2.84	1.51
154.9	-6.27	-1.73	2.59
155	-4.06	-0.92	2.86
155.1	-2.68	-3.14	-1.57
155.2	2.31	0.19	-1.85
155.3	6.74	1.56	-0.47
155.4	12.28	2.11	0.06
155.5	15.33	-2.62	0.89
155.6	15.04	-4.56	1.17
155.7	15.04	-4.01	5.33
155.8	13.37	-2.64	10.6
155.9	10.59	0.97	12.79
156	7.25	0.12	6.41
156.1	4.75	4.28	6.68
156.2	0.86	5.67	6.68
156.3	-1.92	5.37	5.3
156.4	-0.82	2.6	2.77
156.5	-2.77	-1.31	-0.84
156.6	-2.5	-2.42	-0.28
156.7	-2.78	-2.97	1.38
156.8	-1.68	-1.05	4.71
156.9	0.53	-3.27	0.24
157	1.91	-0.79	-0.32
157.1	2.19	1.71	0.24
157.2	0.51	3.37	-0.32
157.3	3.01	1.41	-1.98
157.4	1.61	-3.3	-6.45
157.5	1.05	-4.16	-2.84
157.6	1.6	-4.16	0.21
157.7	2.15	-3.32	3.81
157.8	2.42	-7.23	1.87
157.9	3.8	-7.23	1.29
158	4.9	-4.19	2.95
158.1	5.17	-0.59	4.61
158.2	6.83	0.25	3.78
158.3	7.1	-3.66	-2.6
158.4	5.43	-1.44	-0.69
158.5	2.93	0.49	-1.24
158.6	3.2	1.6	-1.8
158.7	2.91	-0.62	-3.46
158.8	2.63	-0.36	-5.68
158.9	4.56	-0.09	-3.77
159	5.11	3.22	-0.17
159.1	5.66	6.28	1.22
159.2	5.93	4.06	-2.38
159.3	4.26	6.26	0.67
159.4	0.65	7.37	5.35
159.5	-1.85	7.35	8.4
159.6	-1.86	4.3	7.85
159.7	-2.42	3.19	6.18
159.8	-2.15	4	6.74
159.9	-1.88	4.83	6.98
160	-2.16	6.76	7.26
160.1	-1.89	1.21	1.99
160.2	-1.35	-1.01	2.82
160.3	-1.91	-1.58	6.15
160.4	-2.75	0.36	9.45
160.5	0.3	0.06	10.28
160.6	1.4	0.06	5.84
160.7	0.29	3.11	5.56
160.8	0	4.76	6.12
160.9	0	6.42	6.37
161	-0.29	4.46	2.48
161.1	1.09	3.91	1.37
161.2	1.64	4.46	3.31
161.3	1.36	5.83	7.2
161.4	3.85	5	9.66
161.5	3.29	-0.57	6.06
161.6	2.17	-0.29	9.39
161.7	4.11	-0.57	9.39
161.8	7.43	-0.86	11.33
161.9	9.36	-4.19	8.8
162	8.8	-2.82	2.69
162.1	6.85	0.78	3.25
162.2	4.35	6.33	5.47
162.3	4.62	8.81	8.24
162.4	2.95	5.2	3.5
162.5	1.56	6.02	5.16
162.6	1.83	4.91	5.71
162.7	2.65	3.8	6.27
162.8	5.14	0.73	2.94
162.9	2.64	-2.88	-2.36
163	2.08	-1.79	-1.53
163.1	1.79	1.26	0.13
163.2	3.73	3.48	0.69
163.3	4	0.69	-4.86
163.4	5.38	2.36	-4.61
163.5	5.65	4.28	-1.84
163.6	5.92	6.5	2.88
163.7	8.41	5.67	3.99
163.8	8.96	1.76	1.49
163.9	9.23	1.76	5.62
164	9.78	1.19	7.01
164.1	9.5	1.19	7.56
164.2	8.1	0.36	3.4
164.3	9.21	2.56	0.35
164.4	8.92	5.89	1.15
164.5	6.98	6.7	2.54
164.6	8.63	5.04	0.59
164.7	6.96	1.15	-3.57
164.8	6.12	0.58	-1.63
164.9	5.84	-0.81	0.01
165	8.05	0.56	2.5
165.1	8.05	-3.04	1.12
165.2	8.32	-4.71	-1.1
165.3	7.76	-2.79	2.23
165.4	5.25	-0.01	6.91
165.5	4.97	1.91	8.57
165.6	2.46	-0.58	5.52
165.7	-0.87	2.19	7.74
165.8	-4.48	2.73	9.68
165.9	-4.77	3	9.1
166	-3.94	3.26	6.05
166.1	-5.06	5.2	0.77
166.2	-3.68	6.59	1.05
166.3	-3.68	9.62	3.55
166.4	-0.64	11.29	5.18
166.5	2.96	9.61	2.13
166.6	4.9	12.66	3.24
166.7	4.33	12.66	4.63
166.8	5.72	12.36	6.01
166.9	6.26	9.31	6.26
167	1.82	4.85	0.43
167.1	-2.35	2.36	0.43
167.2	-5.69	0.41	0.71
167.3	-9.3	-1.27	1.54
167.4	-10.69	-4.88	-2.93
167.5	-9.31	-3.23	-4.04
167.6	-6.82	-0.46	-0.99
167.7	-2.94	2.6	1.23
167.8	2.88	3.13	1.79
167.9	6.2	1.47	-2.4
168	7.58	1.17	-2.13
168.1	9.79	2.84	-2.13
168.2	10.9	6.17	0.92
168.3	10.61	6.15	-0.18
168.4	8.94	7.81	-4.66
168.5	5.05	8.35	-1.6
168.6	2.55	10.01	1.73
168.7	1.15	7.79	3.67
168.8	-1.07	2.23	0.34
168.9	-2.74	1.39	3.91
169	-4.41	-0.29	6.96
169.1	-4.14	-0.57	9.18
169.2	-1.65	-1.12	9.18
169.3	-1.1	-1.14	3.91
169.4	-1.39	1.08	4.99
169.5	-2.78	2.73	8.04
169.6	-0.02	3.28	9.71
169.7	-0.02	-1.99	4.99
169.8	-0.03	-2.01	4.44
169.9	-3.09	-0.9	2.74
170	-5.31	2.13	3.57
170.1	-4.21	3.52	2.46
170.2	-4.22	3.8	-2.53
170.3	-1.72	6	-2.25
170.4	-3.4	9.33	-1.45
170.5	-4.51	12.92	-0.34
170.6	-3.69	11.53	-2.56
170.7	-4.8	12.09	-2.29
170.8	-4.81	10.68	1.6
170.9	-2.6	9.01	5.73
171	2.39	4.83	7.95
171.1	2.94	-1.27	4.89
171.2	3.21	-2.93	2.68
171.3	3.76	-2.95	1.01
171.4	3.75	-3.51	-0.41
171.5	3.47	-4.63	-4.01
171.6	3.18	-2.69	-8.18
171.7	1.23	0.64	-4.85
171.8	-0.99	4.78	0.15
171.9	0.67	6.72	4.55
172	-1.84	5.04	3.17
172.1	-4.89	7.54	7.05
172.2	-6.29	8.37	9.55
172.3	-6.57	7.52	10.38
172.4	-4.36	2.52	8.41
172.5	-2.98	-1.93	4.52
172.6	-0.77	-1.66	5.35
172.7	-0.49	0.29	5.35
172.8	2.27	1.65	3.69
172.9	3.1	-0.01	-3
173	1.71	2.47	-4.11
173.1	1.7	5.24	-2.72
173.2	0.3	7.74	2.55
173.3	1.41	7.72	5.88
173.4	0.29	5.22	4.74
173.5	-1.66	5.48	6.4
173.6	-2.22	6.31	10.01
173.7	-2.22	4.1	11.67
173.8	-2.23	-3.14	8.06
173.9	-2.79	-3.69	7.2
174	-2.8	-2.6	8.86
174.1	-1.97	-2.88	10.81
174.2	0.24	-3.71	12.75
174.3	-1.98	-6.23	8.86
174.4	-2.55	-4.01	10.77
174.5	-2.28	-0.69	12.44
174.6	-1.17	3.47	14.38
174.7	0.76	3.19	11.88
174.8	2.7	2.62	7.17
174.9	2.41	3.73	6.3
175	2.13	1.49	5.19
175.1	2.68	-1.56	3.81
175.2	-1.49	-7.11	-1.19
175.3	-5.1	-7.69	-1.46
175.4	-6.77	-6.58	0.72
175.5	-7.33	-7.15	5.16
175.6	-6.23	-7.43	6.55
175.7	-5.96	-6.59	6.55
175.8	-6.52	-2.45	9.88
175.9	-5.97	0.88	12.34
176	-3.21	2.52	11.23
176.1	-2.66	0.3	5.69
176.2	-1.28	0.86	4.3
176.3	0.66	0.56	5.69
176.4	0.65	1.4	6.49
176.5	0.92	-0.84	4.54
176.6	-0.47	-5.28	-1.56
176.7	-1.86	-5.84	-0.45
176.8	-2.98	-6.41	0.38
176.9	0.06	-7.24	0.91
177	2.28	-10.31	-1.87
177.1	3.66	-6.15	-0.48
177.2	3.37	-1.71	2.29
177.3	1.98	3.54	6.18
177.4	1.14	7.15	8.36
177.5	-2.19	3.52	3.93
177.6	-5.25	2.69	3.09
177.7	-7.76	1.58	5.59
177.8	-8.87	0.17	7.81
177.9	-8.32	-5.1	8.33
178	-7.22	-5.67	8.05
178.1	-5.56	-3.45	10.27
178.2	-4.18	-0.68	10.27
178.3	-3.35	3.19	8.05
178.4	-4.47	2.63	0.81
178.5	-6.42	4.28	-0.3
178.6	-10.03	4.28	0.53
178.7	-12.54	2.34	1.64
178.8	-12.27	0.1	-1.96
178.9	-11.44	-2.67	-7.27
179	-10.06	-4.08	-5.05
179.1	-8.12	-4.63	-2
179.2	-4.52	-6.02	3.27
179.3	-3.42	-10.48	4.11
179.4	-1.49	-10.48	7.96
179.5	-1.77	-7.72	11.84
179.6	-2.61	-4.95	14.34
179.7	-2.61	-3.28	10.46
179.8	-2.9	-4.97	2.13
179.9	-4.29	-3.3	-0.4
180	-4.85	-1.93	-1.23
180.1	-4.86	0.56	0.71
180.2	-5.42	0.84	-1.78
180.3	-5.43	3.32	-3.17
180.4	-5.44	6.37	-1.26
180.5	-6	6.91	1.79
180.6	-3.78	6.35	2.62
180.7	-3.79	3.02	-2.37
180.8	-4.07	3.28	-1.82
180.9	-2.42	4.39	-1.01
181	0.08	5.48	0.93
181.1	0.62	3.54	2.04
181.2	-1.33	5.21	1.76
181.3	-3	7.41	5.37
181.4	-5.5	9.9	8.39
181.5	-6.34	10.44	9.77
181.6	-5.24	4.61	2.28
181.7	-3.3	3.78	0.62
181.8	-1.64	5.43	0.62
181.9	-1.93	5.43	1.7
182	-0.27	4.02	1.97
182.1	-2.49	2.64	0.86
182.2	-4.72	2.36	3.08
182.3	-5.56	2.89	3.36
182.4	-7.23	5.39	3.61
182.5	-8.07	3.99	-2.22
182.6	-8.63	7.04	-2.22
182.7	-9.47	11.2	0.55
182.8	-9.2	17.01	3.33
182.9	-6.15	17.84	4.13
183	-5.05	15.6	1.91
183.1	-4.5	15.88	5.24
183.2	-5.06	15.32	8.29
183.3	-3.13	14.75	8.85
183.4	-4.8	9.48	4.37
183.5	-5.64	7.24	2.43
183.6	-5.09	5.58	2.99
183.7	-5.93	6.41	5.21
183.8	-2.88	4.73	3.82
183.9	-3.17	0.29	-1.48
184	-3.45	1.93	0.74
184.1	-3.73	3.6	2.96
184.2	-2.08	3.6	4.34
184.3	-1.8	1.08	3.79
184.4	-3.2	0.53	3.2
184.5	-4.04	2.45	6.81
184.6	-5.15	6.89	10.97
184.7	-4.33	8.83	13.47
184.8	-4.89	4.93	7.09
184.9	-4.34	6.32	5.94
185	-4.35	8.24	7.33
185.1	-1.58	8.79	6.22
185.2	2.85	6.85	4.83
185.3	2.57	5.45	1.78
185.4	2.56	5.72	5.91
185.5	1.72	5.98	8.69
185.6	0.61	5.98	8.96
185.7	-2.73	0.99	2.86
185.8	-4.12	1.53	0.64
185.9	-5.24	4.02	-0.5
186	-7.74	5.39	-0.78
186.1	-8.3	3.45	-2.17
186.2	-11.92	-1.82	-5.22
186.3	-13.59	-1.29	-2.44
186.4	-13.59	-1.01	1.13
186.5	-9.16	-0.75	4.18
186.6	-5.01	-3.25	1.96
186.7	-2.79	-1.86	0.85
186.8	-1.13	0.07	1.69
186.9	-2.25	2.28	4.71
187	-3.09	1.16	5.26
187.1	-5.04	-2.17	1.38
187.2	-6.71	-1.62	4.71
187.3	-6.71	-0.25	7.48
187.4	-5.06	0.86	8.28
187.5	-5.06	3.06	6.62
187.6	-6.74	7.78	2.73
187.7	-5.35	13.33	2.18
187.8	0.19	16.64	3.29
187.9	5.73	18.02	1.59
188	7.94	14.68	-5.62
188.1	6.55	12.73	-3.4
188.2	3.49	10.24	0.2
188.3	1.82	6.06	1.59
188.4	2.37	1.34	2.67
188.5	0.42	-2.01	-1.22
188.6	0.14	-0.9	-1.77
188.7	-0.98	1.32	-0.66
188.8	-1.54	3.8	-0.11
188.9	-1.27	2.69	-4.3
189	-0.72	5.17	-3.47
189.1	-1.01	7.94	0.97
189.2	-1.29	8.22	5.13
189.3	2.87	5.43	6.24
189.4	5.35	4.32	1.77
189.5	3.96	4.86	2.33
189.6	4.79	5.41	3.71
189.7	5.33	5.69	5.66
189.8	2.83	3.45	3.44
189.9	0.88	4	2.3
190	-1.62	6.48	2.02
190.1	-3.57	6.48	0.35
190.2	-3.85	4.54	-1.87
190.3	-5.25	0.92	-7.42
190.4	-6.92	2.3	-6.34
190.5	-6.92	3.12	-3.01
190.6	-5.82	6.45	2.54
190.7	-5.55	7.56	3.93
190.8	-4.72	7.82	4.76
190.9	-4.18	9.2	6.39
191	-3.9	10.29	9.44
191.1	-2.52	10.57	10.28
191.2	-2.53	6.13	5.01
191.3	-3.09	6.11	8.06
191.4	-5.04	4.73	11.63
191.5	-4.77	5.82	14.96
191.6	-1.17	5.26	15.52
191.7	-0.07	5.26	10.52
191.8	3.81	7.46	9.41
191.9	6.3	11.35	10.21
192	9.35	13.55	11.88
192.1	9.9	10.5	6.61
192.2	9.06	11.88	4.94
192.3	6.55	12.42	4.39
192.4	5.44	13.53	4.63
192.5	6.54	14.34	2.97
192.6	6.53	12.4	0.19
192.7	4.31	12.4	2.41
192.8	2.08	12.11	4.08
192.9	-0.98	12.66	5.16
193	-2.09	8.48	2.38
193.1	-1.82	7.93	0.16
193.2	-2.11	7.37	2.38
193.3	-0.45	7.08	5.16
193.4	2.04	5.97	7.34
193.5	2.59	-0.16	6.23
193.6	2.58	-0.16	6.79
193.7	3.13	-1.54	7.62
193.8	2.29	-0.73	9.01
193.9	0.34	-1.28	6.48
194	-1.05	0.08	3.43
194.1	-1.33	5.08	4.81
194.2	-1.06	9.79	6.48
194.3	0.88	9.78	7.31
194.4	2.25	5.06	2.56
194.5	1.14	7.26	4.5
194.6	0.85	6.71	4.5
194.7	1.68	5.87	2.56
194.8	3.62	4.47	0.9
194.9	1.94	0.86	-3.02
195	0.83	-0.82	-1.91
195.1	-0.29	0.57	3.64
195.2	1.37	0.57	5.03
195.3	2.47	-3.34	-0.24
195.4	4.41	-0.84	1.11
195.5	4.96	1.64	3.33
195.6	6.06	4.41	5
195.7	8.27	3.3	4.16
195.8	6.6	1.62	-0.28
195.9	5.49	3.01	-0.31
196	3.54	3.82	-0.58
196.1	2.98	3.54	0.53
196.2	2.14	-1.17	-3.36
196.3	-0.09	-1.47	-4.19
196.4	-1.48	-0.36	-0.34
196.5	-0.93	1.56	1.88
196.6	2.11	-0.93	2.44
196.7	2.94	-5.09	-0.62
196.8	4.04	-2.06	0.22
196.9	6.25	-0.12	0.74
197	8.19	1.53	2.4
197.1	7.63	0.42	0.74
197.2	7.9	-2.63	-3.7
197.3	7.06	-1.82	-2.04
197.4	4.56	-1.82	-0.68
197.5	6.22	-1.84	-0.96
197.6	2.6	-6.83	-4.01
197.7	0.1	-6	-0.68
197.8	-0.18	-4.91	2.09
197.9	1.19	-3.8	5.95
198	3.96	-4.1	7.33
198.1	5.9	-3.54	4
198.2	7.83	-1.6	6.78
198.3	8.94	0.88	9.55
198.4	8.93	3.1	11.19
198.5	6.98	1.14	5.91
198.6	2.26	2.53	7.3
198.7	-1.91	3.64	8.97
198.8	-4.41	3.06	11.46
198.9	-4.42	1.12	11.99
199	-5.53	-2.5	7.82
199.1	-4.71	-1.67	7.55
199.2	-4.16	2.77	7.82
199.3	-5	3.3	8.1
199.4	-5.01	-0.3	4.74
199.5	-5.57	0.23	2.8
199.6	-5.02	0.23	3.63
199.7	-3.64	-0.32	5.3
199.8	-1.42	-1.17	5.3
[truncated: 702 more rows]

## Sheet: Fig.9d
EPSCs
Time (min)
0.166667	-75.9851
0.333333	-36.2169
0.5	-75.8807
0.666667	-85.6763
0.833333	-45.5902
1	-77.0841
1.16667	-74.482
1.33333	-50.8399
1.5	-54.8999
1.66667	-74.6909
1.83333	-67.5111
2	-71.3439
2.16667	-59.7227
2.33333	-63.4648
2.5	-85.4492
2.66667	-83.6418
2.83333	-77.0069
3	-56.8208
3.16667	-58.8508
3.33333	-59.6092
3.5	-53.2832
3.66667	-60.7491
3.83333	-89.6181
4	-50.6083
4.16667	-75.3039
4.33333	-81.8798
4.5	-55.6537
4.66667	-86.9024
4.83333	-72.2704
5	-80.808
5.16667	-81.0896
5.33333	-47.3068
5.5	-84.5591
5.66667	-71.4484
5.83333	-89.0732
6	-109.228
6.16667	-69.2322
6.33333	-92.4065
6.5	-84.2685
6.66667	-36.0444
6.83333	-76.2894
7	-75.1632
7.16667	-61.5392
7.33333	-88.9733
7.5	-97.7698
7.66667	-124.877
7.83333	-59.423
8	-50.8626
8.16667	-58.3876
8.33333	-45.5766
8.5	-53.047
8.66667	-97.2203
8.83333	-25.3632
9	-68.1241
9.16667	-75.8171
9.33333	-80.1677
9.5	-77.0024
9.66667	-79.6182
9.83333	-51.1033
10	-78.0969
10.1667	-77.2885
10.3333	-91.8343
10.5	-74.0914
10.6667	-58.9779
10.8333	-67.7018
11	-51.4666
11.1667	-70.7218
11.3333	-75.3766
11.5	-57.1478
11.6667	-46.1578
11.8333	-59.9861
12	-45.236
12.1667	-60.8717
12.3333	-84.3321
12.5	-52.0842
12.6667	-35.8037
12.8333	-54.6773
13	-63.6918
13.1667	-56.562
13.3333	-78.2513
13.5	-95.3765
13.6667	-66.9479
13.8333	-81.5755
14	-64.4956
14.1667	-80.7081
14.3333	-55.1542
14.5	-81.8661
14.6667	-52.384
14.8333	-43.6102
15	-73.1287
15.1667	-88.7099
15.3333	-18.2606
15.5	-46.6074
15.6667	-91.8525
15.8333	-43.2423
16	-71.1895
16.1667	-80.0496
16.3333	-84.6681
16.5	-75.6854
16.6667	-79.6409
16.8333	-68.0833
17	-53.0515
17.1667	-100.49
17.3333	-98.5963
17.5	-98.2466
17.6667	-71.6209
17.8333	-81.3257
18	-62.7382
18.1667	-53.7963
18.3333	-79.0596
18.5	-71.0624
18.6667	-58.9779
18.8333	-63.5102
19	-80.8398
19.1667	-66.9888
19.3333	-63.2922
19.5	-53.3104
19.6667	-35.9535
19.8333	-69.9725
20	-52.7291
20.1667	-62.7972
20.3333	-77.5019
20.5	-47.0616
20.6667	-53.7736
20.8333	-56.2441
21	-73.9915
21.1667	-75.808
21.3333	-54.5956
21.5	-50.3585
21.6667	-52.3658
21.8333	-59.868
22	-53.0833
22.1667	-61.5756
22.3333	-60.2904
22.5	-74.3139
22.6667	-86.2621
22.8333	-97.8788
23	-65.9625
23.1667	-62.175
23.3333	-76.907
23.5	-66.8617
23.6667	-47.5656
23.8333	-57.3976
24	-65.6582
24.1667	-109.586
24.3333	-81.8616
24.5	-67.947
24.6667	-84.927
24.8333	-80.4992
25	-58.0969
25.1667	-48.9235
25.3333	-97.0023
25.5	-76.7072
25.6667	-61.4666
25.8333	-62.561
26	-73.4102
26.1667	-75.8852
26.3333	-74.105
26.5	-94.441
26.6667	-76.4484
26.8333	-69.0733
27	-103.001
27.1667	-70.2903
27.3333	-65.3903
27.5	-68.8825
27.6667	-52.0752
27.8333	-28.8555
28	-82.0705
28.1667	-71.7663
28.3333	-73.3421
28.5	-60.8172
28.6667	-75.9397
28.8333	-62.8517
29	-93.2149
29.1667	-53.8554
29.3333	-27.098
29.5	-65.2722
29.6667	-38.6601
29.8333	-61.621
30	-51.7209
30.1667	-51.0216
30.3333	-100.436
30.5	-55.5538
30.6667	-88.0105
30.8333	-44.2687
31	-61.462
31.1667	-62.7654
31.3333	-64.6455
31.5	-53.8917
31.6667	-49.1596
31.8333	-63.8644
32	-58.5965
32.1667	-67.5701
32.3333	-40.8627
32.5	-67.2749
32.6667	-44.0325
32.8333	-55.2859
33	-57.0751
33.1667	-38.5829
33.3333	-54.9725
33.5	-13.3832
33.6667	-68.2331
33.8333	-61.4121
34	-47.0979
34.1667	-27.3069
34.3333	-50.8127
34.5	-58.6419
34.6667	-49.4003
34.8333	-57.5111
35	-32.5203
35.1667	-41.5484
35.3333	-36.394
35.5	-27.2933
35.6667	-28.9145
35.8333	-40.4403
36	-28.2878
36.1667	-49.473
36.3333	-65.6128
36.5	-32.0707
36.6667	-25.9763
36.8333	-30.395
37	-26.0671
37.1667	-17.752
37.3333	-24.4686
37.5	-15.2088
37.6667	-46.8027
37.8333	-35.7174
38	-20.1452
38.1667	-66.4938
38.3333	-4.42323
38.5	6.91641
38.6667	-8.5422
38.8333	-27.9109
39	-10.5994
39.1667	-28.3968
39.3333	7.42049
39.5	-26.93
39.6667	0.83106
39.8333	-27.9699
40	-22.9518
40.1667	-8.55128
40.3333	-22.6293
40.5	-22.4023
40.6667	-35.3677
40.8333	-23.8555
41	-16.6802
41.1667	16.3941
41.3333	-27.5203
41.5	-29.7183
41.6667
41.8333
42
42.1667
42.3333
42.5
42.6667
42.8333
43
43.1667
43.3333
43.5
43.6667
43.8333
44
44.1667
44.3333
44.5
44.6667
44.8333
45

## Sheet: Fig.9e
Column graph
0.25 μM APP17	20 μM bac
22.857	71.429
1.923	46.154
-2.674	74.866
-15.686	92.157
18.792	93.289
6.03	50.754
