# Supplementary material for: Soluble amyloid-β precursor peptide does not regulate GABAB receptor activity
Source: eLife. 2023 Jan 23;12:e82082. doi: 10.7554/eLife.82082 (PMC9917443; doi:10.7554/eLife.82082)
Supplement: Figure 10—source data 1. [file elife-82082-fig10-data1.xlsx]

## Sheet: Fig.10c
Traces with ACSF I										Traces with 5 µM sc-APP17										Traces with 5 µM APP17										Traces with 5 µM baclofen
	Trace 1	Trace 2	Trace 3	Trace 4	Trace 5	Trace 6	Trace 7				Trace 1	Trace 2	Trace 3	Trace 4	Trace 5	Trace 6	Trace 7				Trace 1	Trace 2	Trace 3	Trace 4	Trace 5	Trace 6	Trace 7				Trace 1	Trace 2	Trace 3	Trace 4	Trace 5	Trace 6	Trace 7
Time (s)	ΔF/F	ΔF/F	ΔF/F	ΔF/F	ΔF/F	ΔF/F	ΔF/F			Time (s)	ΔF/F	ΔF/F	ΔF/F	ΔF/F	ΔF/F	ΔF/F	ΔF/F			Time (s)	ΔF/F	ΔF/F	ΔF/F	ΔF/F	ΔF/F	ΔF/F	ΔF/F			Time (s)	ΔF/F	ΔF/F	ΔF/F	ΔF/F	ΔF/F	ΔF/F	ΔF/F
0	-0.0676097	0.40968	0.0971182	-0.53195	-0.341197	-0.208912	0.115152			0	-0.0605271	0.0851926	0.32629	-0.281429	-0.159466	-0.0750988	0.218278			0	-0.258958	0.153986	0.233232	-0.19012	-0.352481	0.0829137	0.126519			0	-0.271586	-0.0353751	0.270919	-0.014626	-0.22553	-0.0916559	-0.183533
0.0333333	0.369943	0.289824	0.664033	-0.220026	-0.265817	-0.285001	-0.295871			0.0333333	-0.0505185	0.44817	0.507512	-0.137635	-0.261792	0.0288629	0.0945906			0.0333333	-0.487419	-0.0473259	0.208119	-0.214653	-0.363112	-0.319874	0.0896305			0.0333333	-0.127881	0.312541	0.0676498	-0.157399	0.0896681	0.133387	-0.128844
0.0666667	-0.369039	0.959295	0.107894	-0.252314	-0.0501236	-0.0120455	-0.346407			0.0666667	-0.0850866	0.490047	0.359853	-0.219689	-0.0769783	0.100561	0.281973			0.0666667	-0.191467	0.258709	0.0928171	-0.237248	-0.407401	-0.073461	0.376205			0.0666667	-0.27595	0.0228049	0.151378	-0.0378568	-0.172605	-0.121201	-0.0151099
0.1	0.323977	0.567949	0.160437	-0.296675	-0.0878086	-0.143692	-0.231859			0.1	-0.105375	0.543675	0.48479	-0.296167	-0.159988	0.0157183	0.221596			0.1	-0.402253	0.26481	0.120599	-0.215303	-0.276707	0.0079566	-0.0442335			0.1	-0.383001	0.0780759	0.150894	-0.102709	-0.205536	0.0221228	-0.269197
0.133333	0.470714	0.511974	0.00293908	-0.572149	-0.403156	-0.127991	0.361091			0.133333	0.0444892	0.474358	0.200946	-0.0523947	-0.313476	0.0420075	0.00245939			0.133333	-0.149694	0.0939993	0.233906	-0.0667537	-0.269996	-0.0289591	0.303579			0.133333	-0.174134	0.0850575	0.177028	0.064262	-0.136734	0.125215	-0.277909
0.166667	-0.200983	0.497141	0.736431	-0.355421	-0.223071	-0.0519018	-0.0533004			0.166667	0.0300155	0.296137	0.407251	-0.1934	-0.0430437	0.0324478	0.360291			0.166667	-0.179186	0.00859418	0.174224	-0.157673	-0.115915	0.14205	0.0691669			0.166667	-0.300094	0.280542	0.136858	0.0933005	-0.123208	0.166704	-0.0436646
0.2	-0.265387	0.770541	0.240856	0.0196706	-0.00703028	-0.167848	0.199378			0.2	-0.0134152	0.314351	0.330975	-0.319668	-0.238298	0.0682967	0.494931			0.2	-0.225675	-0.028008	0.186509	-0.226125	-0.278393	-0.228381	-0.0539596			0.2	-0.141263	0.271815	0.290279	-0.279361	-0.349022	0.242137	0.0347395
0.233333	0.174031	0.668919	0.184185	-0.191993	-0.167714	-0.311572	0.199378			0.233333	0.36055	0.188042	0.552779	-0.277446	-0.360463	-0.0966081	0.206898			0.233333	-0.314578	0.0187614	0.169073	-0.182498	-0.316333	0.0299298	0.00502957			0.233333	-0.257914	0.187454	0.156217	-0.0465684	-0.230234	0.184933	-0.129328
0.266667	0.398342	0.537098	0.442953	-0.247869	-0.0777459	-0.00962994	-0.177955			0.266667	-0.103159	0.318948	0.269687	-0.018139	-0.0169402	-0.0918283	0.107631			0.266667	-0.22983	0.129585	0.0239788	-0.180245	-0.288883	0.154369	0.0354022			0.266667	-0.264605	0.111239	0.00473303	-0.374704	-0.130265	0.302484	-0.108517
0.3	-0.0433375	-0.0792419	0.26793	-0.555798	-0.281302	-0.0506941	0.000604298			0.3	0.195807	0.237738	0.469779	-0.263106	-0.145892	-0.0261054	-0.00241714			0.3	-0.18897	0.146869	0.340831	-0.075223	-0.110153	-0.219456	0.159043			0.3	-0.240169	0.277052	0.082653	-0.254678	-0.307858	0.00577885	-0.0610876
0.333333	1.47473	0.931961	0.275142	-0.193458	-0.0966425	-0.100213	0.566603			0.333333	-0.142673	0.581288	0.18712	-0.293379	-0.126053	0.0814412	0.309351			0.333333	-0.220176	0.415285	0.251062	-0.0566939	-0.307516	0.098708	0.335995			0.333333	-0.217188	0.281706	0.0812011	-0.241126	-0.168489	0.174875	0.0279639
0.366667	0.548863	1.29308	0.118472	0.0606854	-0.4105	-0.173886	0.209485			0.366667	0.253935	0.227745	0.387626	-0.259522	-0.0696693	0.242761	0.145301			0.366667	-0.244019	-0.100196	0.362047	-0.20586	-0.0906126	-0.000895907	0.0809461			0.366667	-0.351293	0.172327	0.195903	-0.306947	-0.215533	0.297455	-0.17095
0.4	-0.379565	0.912064	0.29593	-0.217961	-0.154937	-0.0506941	0.206116			0.4	-0.0237752	0.433074	0.533271	-0.277844	-0.168341	-0.217299	0.132529			0.4	-0.292141	0.363432	0.0380808	-0.144255	-0.114704	-0.186282	-0.129813			0.4	-0.157262	0.300324	0.491128	-0.265325	-0.205536	0.182419	-0.21596
0.433333	-0.352893	0.437371	0.429578	-0.188078	-0.277605	-0.263261	0.57671			0.433333	-0.0109146	0.526766	0.0301503	-0.169899	-0.300947	-0.0189357	0.0458905			0.433333	-0.355291	0.133652	0.22956	-0.211947	-0.0919034	-0.213006	-0.0418133			0.433333	-0.207006	0.378867	0.402561	-0.120617	-0.244936	-0.0206228	-0.14046
0.466667	0.294457	0.823021	-0.0563872	-0.200495	-0.331074	0.151003	0.233068			0.466667	0.103308	0.214854	0.196656	-0.233232	-0.317653	0.120875	0.382853			0.466667	-0.450813	-0.000556335	0.0569081	-0.12375	-0.288472	-0.0950624	0.025822			0.466667	-0.202643	0.0786577	0.13831	-0.187889	-0.177897	-0.0514248	-0.211604
0.5	0.688724	0.130921	0.151003	-0.340232	-0.390343	-0.187172	0.101675			0.5	0.256277	0.486338	0.322126	-0.0416399	-0.088986	-0.0989981	0.199758			0.5	-0.0924017	0.380717	0.257837	-0.0281125	-0.34924	0.125849	0.183754			0.5	-0.337039	-0.0406114	0.26608	-0.0978698	-0.160844	-0.063997	-0.102225
0.533333	0.144343	0.72731	0.421319	0.0351337	0.0462656	-0.41544	0.12189			0.533333	0.18194	0.414157	0.45913	-0.244784	-0.239865	-0.18384	0.460124			0.533333	-0.363035	-0.0900284	0.455041	-0.30961	-0.41446	-0.219509	0.186856			0.533333	-0.231733	0.0635309	0.168317	-0.131264	-0.247876	0.226422	-0.0635075
0.566667	-0.450292	0.658547	-0.261763	-0.103295	-0.18062	-0.115914	0.492484			0.566667	-0.00756874	0.26777	0.294832	-0.279836	-0.05975	-0.0141557	0.149724			0.566667	-0.379375	0.539326	0.307236	-0.263827	-0.279246	-0.369602	0.000563631			0.566667	-0.27275	0.297996	0.362391	-0.286136	-0.219649	-0.0533107	-0.034469
0.6	-0.142664	0.104091	0.238283	-0.546367	0.52511	0.0386808	-0.0431932			0.6	-0.12148	0.596565	0.146483	0.00974342	-0.398574	0.247541	0.353234			0.6	-0.446978	0.0736648	0.216366	-0.218613	-0.306089	-0.0406202	-0.0552138			0.6	-0.284677	-0.0673742	0.174608	-0.146751	-0.167312	0.299969	-0.202892
0.633333	-0.104576	0.678612	0.544476	-0.0162188	-0.420678	-0.111083	0.0275566			0.633333	0.106877	0.766085	0.403055	-0.0241138	-0.166774	-0.162331	0.350431			0.633333	-0.394006	0.176354	0.228917	-0.0782427	-0.394492	0.222819	0.268823			0.633333	-0.333548	0.279379	0.123307	0.0376434	-0.239055	0.124587	-0.176758
0.666667	-0.448923	0.566789	0.769709	0.0847875	-0.131048	-0.0494863	-0.289133			0.666667	-0.0604542	0.226124	0.461182	-0.0675308	-0.264924	-0.0416399	0.0324552			0.666667	-0.215304	0.155003	0.0958839	-0.375337	-0.314479	0.0773177	0.37305			0.666667	-0.354202	0.266579	0.209939	-0.171918	-0.192599	0.0290375	-0.229995
0.7	0.00255369	0.360556	0.223667	-0.452155	-0.23625	0.0543818	-0.0937288			0.7	0.0792338	0.360681	0.437963	-0.0982015	-0.0477423	0.0193033	0.470637			0.7	-0.117252	-0.0107237	0.143229	0.285729	-0.117621	0.0680758	0.168213			0.7	-0.256168	0.411447	0.271404	-0.140944	-0.153787	0.17739	-0.212572
0.733333	-0.385115	0.00615146	0.712723	-0.0969371	-0.62428	0.016941	0.263389			0.733333	0.101651	0.473945	0.39219	-0.321261	-0.235688	0.0850261	0.332392			0.733333	-0.285696	0.185505	0.536089	-0.105269	-0.250897	-0.158522	0.245401			0.733333	-0.302712	-0.111009	0.0100568	-0.107065	-0.0420565	0.000749999	-0.270649
0.766667	0.0906594	0.194167	0.212127	-0.00345705	0.0742892	0.064044	0.529543			0.766667	-0.00244955	0.216581	0.373225	-0.290989	0.0357891	0.00496361	0.243345			0.766667	-0.16682	-0.0707106	0.163589	-0.0330714	-0.134785	-0.266025	0.168102			0.766667	-0.361474	-0.0237392	0.145086	-0.24887	-0.18613	0.0824696	-0.271133
0.8	0.442587	0.045286	0.219681	-0.450378	-0.449926	0.0555895	0.239806			0.8	-0.0103491	0.320463	0.48992	-0.126881	-0.286329	-0.0500046	0.137391			0.8	-0.0094304	0.00147711	0.350693	-0.156752	-0.30926	-0.156462	-0.0445999			0.8	-0.220678	0.0670217	0.126695	-0.148203	-0.168489	-0.0514248	-0.0775428
0.833333	-0.116767	0.231199	0.588194	-0.133336	-0.436934	-0.0881349	0.7519			0.833333	0.00307745	0.593856	0.508065	-0.169501	-0.186613	0.0228881	0.265701			0.833333	-0.0688885	0.072648	0.325318	-0.114751	-0.0811468	-0.355444	0.0755679			0.833333	-0.114209	0.277633	0.234137	-0.303075	-0.142614	0.341458	-0.176274
0.866667	0.889326	0.632843	0.816125	-0.0652841	-0.400698	-0.0084222	0.290341			0.866667	-0.0177328	0.338703	0.308412	-0.103778	-0.326006	-0.294972	0.394951			0.866667	-0.485863	0.455954	0.120647	-0.164763	-0.188952	-0.0873025	0.126982			0.866667	-0.360602	-0.142426	-0.0364049	-0.249354	-0.283748	-0.150745	-0.346633
0.9	1.27575	1.55502	0.0648233	-0.0235644	-0.51841	-0.149731	0.182532			0.9	0.00863613	0.453427	0.268268	-0.174281	-0.00806495	-0.038055	0.293281			0.9	-0.264858	0.0451964	0.41485	-0.185873	-0.364878	-0.00626781	0.131261			0.9	-0.342275	-0.0516655	-0.00978618	-0.17337	-0.337261	0.147845	-0.317595
0.933333	0.78539	1.09113	0.510663	-0.145032	-0.817752	0.0628361	0.307187			0.933333	-0.090773	0.449437	0.462419	-0.0774888	-0.303557	-0.19818	0.575452			0.933333	-0.347108	0.219057	0.274071	-0.152956	-0.300492	0.0279554	-0.0183471			0.933333	-0.361474	0.0204777	0.350775	-0.118197	-0.257285	0.28614	-0.232415
0.966667	-0.263978	0.851053	0.088193	-0.109427	-0.324469	0.256079	0.327401			0.966667	-0.22528	0.640298	0.313507	-0.129271	-0.317653	0.00974352	0.304785			0.966667	-0.349674	0.281077	0.433243	-0.17081	-0.32199	-0.141667	-0.107672			0.966667	-0.196534	-0.0377024	0.195419	-0.129812	-0.118504	0.113271	-0.202408
1	0.748109	0.612282	0.528136	-0.157451	-0.254226	-0.0374086	0.128628			1	-0.0821061	0.331549	0.182978	-0.13405	0.0806872	0.0193033	0.356136			1	-0.134893	0.237358	0.785218	-0.170817	-0.38863	0.111151	0.201764			1	-0.329184	0.174655	0.192516	0.00570093	-0.197891	0.167332	-0.481662
1.03333	-0.594872	0.910247	0.431018	0.530004	-0.550872	-0.171471	0.334139			1.03333	-0.342732	0.47687	0.28071	-0.170696	-0.292594	-0.0559795	0.0733742			1.03333	-0.367507	0.426469	0.465207	-0.0421582	-0.114844	-0.182001	0.183324			1.03333	-0.208752	0.221199	0.113144	-0.0489883	-0.0785159	0.110129	-0.102709
1.06667	1.0189	1.16487	0.246017	0.641446	-0.176783	-0.265677	-0.181324			1.06667	-0.322979	0.561095	0.45837	-0.187027	-0.244041	0.177038	0.356687			1.06667	-0.24342	0.113317	0.599351	-0.113627	-0.248396	-0.256062	-0.0381502			1.06667	-0.351293	0.27007	0.177996	-0.134652	-0.026767	-0.147602	-0.124972
1.1	0.843482	1.89371	0.594008	0.154163	-0.292363	-0.127991	0.0309256			1.1	-0.0663501	0.44065	0.277175	-0.111346	0.035267	-0.0535895	0.163738			1.1	-0.322997	0.0634975	0.511459	-0.135069	-0.21535	-0.174915	0.316496			1.1	-0.274204	0.28636	0.417564	-0.236287	-0.254345	0.339572	-0.0606037
1.13333	0.629733	2.09088	0.439835	0.151482	-0.485989	-0.0325776	0.22633			1.13333	0.246788	0.44863	0.447622	0.11729	-0.0571396	0.206912	0.221878			1.13333	-0.530726	0.0685811	0.307056	-0.0656664	-0.255561	-0.225388	-0.221783			1.13333	-0.185189	0.0879665	0.105884	-0.0683472	-0.26787	0.0937845	-0.254678
1.16667	0.582801	0.996517	0.77708	-0.037919	-0.368757	0.410674	-0.0533004			1.16667	0.108474	0.347332	0.317656	-0.159145	-0.313999	0.0766614	0.0252312			1.16667	-0.307109	0.184488	0.789611	-0.120512	-0.0998999	-0.236903	0.380813			1.16667	-0.205261	0.217708	0.127663	-0.244998	-0.204948	0.108871	-0.139008
1.2	0.133053	1.2725	0.770315	0.252725	-0.118534	0.0205642	-0.0364552			1.2	-0.0561955	0.207572	0.367332	-0.298159	-0.158943	0.155529	-0.0353762			1.2	-0.274619	-0.0259745	0.532861	0.0445026	-0.0784607	0.000366432	0.25287			1.2	-0.16308	0.196181	0.198323	-0.201925	-0.297273	0.494839	-0.127876
1.23333	0.181368	1.94914	0.657448	0.164282	-0.49115	0.0169409	0.243175			1.23333	0.120235	0.361948	0.279155	-0.206147	-0.121876	-0.103778	0.196616			1.23333	-0.163525	0.328863	0.580942	-0.0784552	-0.301458	0.0385626	0.270339			1.23333	-0.362929	0.352686	0.139278	-0.280813	-0.160256	0.230822	-0.0610876
1.26667	-0.221313	1.38216	0.338696	0.508546	-0.306399	0.0761216	0.0511399			1.26667	0.203207	0.391483	0.43072	-0.269479	-0.158943	-0.224469	0.246915			1.26667	-0.428004	-0.0452924	0.452227	-0.14504	-0.134488	0.113911	0.0799857			1.26667	-0.183152	0.303814	0.0148965	0.0628101	-0.240231	0.433864	-0.299204
1.3	0.253385	1.05576	0.132515	-0.393098	-0.312712	0.305598	0.172425			1.3	0.285191	0.483752	0.165826	-0.178264	-0.0915963	0.12207	-0.0392981			1.3	-0.235495	0.122468	0.566484	-0.240728	-0.208951	0.0968012	0.184401			1.3	-0.271295	-0.0132667	0.157669	-0.284684	-0.107331	0.435121	-0.300171
1.33333	1.15444	1.32198	0.0435652	-0.0759367	-0.591728	-0.102628	0.492484			1.33333	-0.37809	0.480266	0.514934	-0.355119	-0.216371	-0.226859	0.0633679			1.33333	-0.253434	0.259726	0.542342	0.0344828	-0.177434	-0.0121631	0.240694			1.33333	-0.195661	0.119966	0.335772	-0.317595	-0.154963	0.473466	-0.0233376
1.36667	-0.0725658	1.27532	-0.238629	0.0206896	-0.310019	-0.29104	0.398151			1.36667	-0.0592511	0.437209	0.276149	-0.126881	-0.257093	0.1149	0.0536295			1.36667	0.072637	0.27396	0.18263	-0.125867	0.00623929	0.0362281	0.302046			1.36667	-0.377183	0.184545	0.0482909	-0.203376	-0.124972	0.200649	-0.0809306
1.4	1.56225	0.371318	0.625109	0.0149118	-0.0926589	0.0712905	0.438579			1.4	-0.297903	0.518931	0.247291	-0.290989	-0.0795887	0.00257375	0.191509			1.4	-0.0219754	0.260743	0.249006	-0.0536776	-0.0155725	0.103615	0.316858			1.4	-0.218351	0.132765	-0.0412446	-0.00591446	-0.304918	0.0610967	-0.132232
1.43333	1.0026	0.662131	0.40525	-0.078686	-0.305135	0.073706	0.115152			1.43333	0.134528	0.157696	0.352374	-0.18145	-0.233078	0.0348378	-0.0551679			1.43333	0.0986694	0.016728	0.54453	-0.0316625	-0.0746876	-0.0907481	0.251101			1.43333	-0.29544	-0.0481748	0.118467	-0.0393087	0.0191014	0.118929	-0.250806
1.46667	1.23784	0.470543	0.556508	-0.0676795	-0.314522	0.251248	-0.0465622			1.46667	-0.226631	0.25486	0.354025	-0.246775	-0.283196	-0.071514	0.56082			1.46667	-0.00816928	0.219057	0.60773	-0.182409	-0.145622	-0.0317156	0.203595			1.46667	-0.29224	0.196763	0.0018292	-0.179178	-0.127913	0.207563	-0.244998
1.5	0.983876	1.43504	0.444694	-0.24031	-0.0920192	0.368402	-0.12405			1.5	-0.0721097	0.350023	0.114742	-0.294972	-0.18087	-0.0189357	0.189727			1.5	-0.275248	0.113317	0.470301	-0.0167343	-0.293524	0.113626	-0.0159885			1.5	-0.213406	0.0908755	0.233169	-0.246934	-0.35549	-0.0709117	-0.0993217
1.53333	1.01043	1.15378	0.61393	-0.0411188	-0.0282886	0.0592129	-0.0398242			1.53333	0.0126016	0.756344	0.291308	-0.0217239	-0.201753	-0.00818095	0.149072			1.53333	0.0466169	0.189572	0.45155	-0.252407	-0.0373616	0.200957	0.465251			1.53333	-0.185771	-0.000467107	0.401109	-0.0891582	-0.197891	0.189333	-0.303559
1.56667	0.84842	0.668579	0.0165718	0.156077	-0.421496	0.317675	0.0881993			1.56667	0.203934	0.395677	0.345537	-0.0623526	0.0211711	0.245151	0.268475			1.56667	-0.0796435	0.10315	0.406454	-0.156594	-0.121624	0.338822	0.392293			1.56667	-0.196534	0.0914573	0.104432	-0.0814147	-0.244348	0.179276	-0.228543
1.6	-0.15109	0.490086	0.388889	-0.193146	-0.361492	0.0918226	0.196008			1.6	0.0981806	0.52017	0.241883	-0.138432	-0.146936	0.160309	0.0161052			1.6	-0.240543	0.368516	0.320054	-0.207448	-0.163985	-0.0846954	0.0477945			1.6	-0.20817	0.0932027	0.297054	-0.0451165	0.00145973	0.194362	-0.152075
1.63333	0.122527	0.990113	0.348822	0.654658	-0.476211	-0.0349931	0.162318			1.63333	0.43066	0.272411	0.468009	-0.0388517	-0.0576616	0.150749	0.253958			1.63333	-0.0548361	0.366482	0.264057	-0.24011	-0.130138	-0.0628889	-0.00499718			1.63333	-0.204388	0.0193141	0.286891	-0.144815	-0.323147	0.201277	0.220586
1.66667	0.456743	1.58264	-0.0180766	0.892459	-0.162489	0.0471351	0.303818			1.66667	0.0830042	0.50962	0.258517	-0.00857931	-0.368816	0.234397	-0.119342			1.66667	-0.390257	0.00147711	0.264983	-0.0851315	-0.150415	-0.175425	0.204362			1.66667	-0.264023	0.219453	0.106368	0.000861195	-0.254933	0.117043	-0.190309
1.7	0.892655	0.679666	0.351818	1.14749	-0.101565	-0.014461	0.15558			1.7	0.0650014	0.662897	0.429797	-0.114134	0.00655305	0.208107	0.17732			1.7	-0.097485	-0.178484	0.271807	6.07956e-05	-0.170656	-0.0430037	0.217975			1.7	-0.27624	0.110075	0.129115	-0.0214017	-0.269634	0.0548105	-0.107065
1.73333	1.90422	1.35253	0.715059	0.569082	-0.360676	0.0278109	0.182532			1.73333	0.224311	0.452072	0.528524	-0.187824	-0.0832432	-0.268683	0.0919071			1.73333	0.0948716	0.147886	0.456769	-0.112736	-0.219536	0.398287	0.218604			1.73333	-0.1209	0.0530584	0.0516787	0.118467	-0.0532295	0.193105	-0.2208
1.76667	1.5915	1.43812	0.309671	1.67629	0.202006	-0.252391	0.12189			1.76667	0.0536298	0.365177	0.375076	-0.25753	-0.316087	-0.235224	-0.0141306			1.76667	-0.179951	0.204823	0.555545	-0.180973	-0.182424	0.136884	0.0635423			1.76667	-0.359438	0.0460769	0.0720057	-0.267261	-0.250816	-0.0388526	-0.270165
1.8	0.874258	2.26724	0.644766	1.29103	-0.138822	-0.0519018	0.192639			1.8	0.211675	0.256379	0.725483	-0.294972	-0.229945	-0.137237	0.351198			1.8	-0.330319	0.227191	0.237028	-0.27658	-0.143297	0.100909	-0.243515			1.8	-0.294276	0.165346	0.161541	-0.0848025	-0.170253	0.0321806	-0.0446325
1.83333	2.37553	2.66048	0.188807	1.00996	-0.278265	-0.239106	0.105044			1.83333	0.159707	0.1207	0.577782	-0.15078	-0.0957729	-0.126482	0.338374			1.83333	-0.231833	0.0950161	0.54435	-0.234662	-0.203714	0.000244067	0.245975			1.83333	-0.316094	-0.00977596	-0.0218856	-0.0310811	-0.384305	0.391747	-0.255646
1.86667	3.63374	2.91942	0.0500212	1.04994	-0.0399628	0.006071	0.222961			1.86667	0.160865	0.731796	0.515501	-0.110948	-0.157899	-0.0511996	0.201264			1.86667	0.0544993	0.0634975	0.692287	-0.193592	-0.220973	-0.279756	0.00855339			1.86667	-0.124391	0.113566	-0.0475363	-0.0678632	-0.142614	0.0227514	-0.0852864
1.9	2.4362	3.37188	0.509677	1.45901	-0.263784	-0.0748495	0.0107114			1.9	-0.133474	0.388054	0.392976	-0.10816	-0.17565	-0.0129608	0.372221			1.9	-0.16215	-0.0188575	0.472969	-0.0997293	-0.282147	0.0567645	0.521917			1.9	-0.200025	0.0757487	-0.00978618	-0.149171	-0.136734	-0.0237659	-0.185469
1.93333	0.417604	3.90522	0.298589	1.65613	-0.296088	-0.0531096	0.246544			1.93333	0.0152692	0.330434	0.411984	-0.146797	-0.261269	0.0204981	0.28694			1.93333	-0.322039	0.1001	0.533856	-0.309622	-0.193404	-0.0645804	0.0327148			1.93333	-0.273332	0.0856393	0.138794	-0.10029	-0.191423	0.0522961	0.0603903
1.96667	0.148773	3.56005	0.378284	1.04886	-0.245079	-0.163017	0.684519			1.96667	-0.0422936	0.357513	0.421528	0.0384226	-0.198621	0.222447	0.737426			1.96667	0.0114938	0.142802	0.527443	-0.125556	-0.107472	-0.392251	0.215102			1.96667	-0.35362	0.207235	0.184288	-0.189825	-0.196715	0.0654969	-0.233383
2	1.42184	3.90175	0.511263	1.08665	-0.0939423	0.201729	0.0814612			2	0.202081	0.39181	0.644063	-0.0834637	0.0618926	-0.18384	0.379072			2	-0.237397	-0.0544429	0.517086	-0.0967164	-0.156991	-0.365579	0.0917674			2	-0.197697	0.143237	0.360455	-0.237255	-0.244936	0.0830981	-0.275005
2.03333	2.65174	3.16615	0.419505	0.891819	-0.612356	0.016941	0.758638			2.03333	0.113714	0.333398	0.887863	-0.0460215	-0.151635	-0.261513	0.663308			2.03333	-0.252342	0.251592	0.362389	-0.27519	-0.171461	-0.0178965	0.492946			2.03333	-0.38271	0.0885483	0.137342	-0.258066	-0.177897	-0.0363381	-0.176274
2.06667	1.86577	2.95651	0.284947	1.29329	-0.210943	-0.175094	0.495853			2.06667	-0.0756749	0.40454	0.364631	-0.14839	-0.199143	0.199743	0.166004			2.06667	-0.134531	0.0279121	0.357227	-0.212671	-0.112032	0.0669713	0.200102			2.06667	-0.368747	0.1764	0.043451	-0.146751	-0.103214	0.312541	-0.321466
2.1	2.24506	2.49168	0.409958	1.01161	-0.254093	0.0930303	0.246544			2.1	-0.157373	0.21685	0.533522	-0.110151	-0.187135	-0.0320802	0.130176			2.1	-0.209668	-0.184584	0.363828	-0.123904	-0.224016	0.45089	0.161374			2.1	-0.230569	0.368976	0.0308677	-0.289524	-0.200244	0.192477	-0.237255
2.13333	4.24157	3.06421	0.765935	1.15884	-0.241359	-0.0362008	0.108413			2.13333	0.17126	0.309383	0.453336	-0.123694	-0.0587058	0.0874161	0.0305355			2.13333	-0.0769529	0.0228283	0.349748	-0.244627	-0.116542	0.0503592	0.0319694			2.13333	-0.123518	0.232835	0.265112	-0.0910941	-0.237879	0.112014	-0.261937
2.16667	2.77515	1.61842	0.284331	0.123078	-0.401249	-0.183549	-0.120681			2.16667	0.0702521	0.475733	0.520381	-0.257928	0.112533	-0.0308852	0.223427			2.16667	-0.190875	0.26481	0.231314	-0.0578032	-0.173373	-0.120569	-0.117519			2.16667	-0.309985	0.171746	0.122339	-0.0426965	-0.0955696	0.120815	-0.175306
2.2	2.08596	1.62437	0.115093	0.466991	-0.501589	-0.213743	0.0444018			2.2	0.00244534	0.805705	0.39575	-0.0687258	-0.159988	0.154334	0.313115			2.2	-0.375194	-0.11443	0.218675	-0.0290086	-0.1974	-0.301434	0.318971			2.2	-0.296604	0.293924	0.174608	0.00812085	-0.279043	0.167332	-0.415358
2.23333	1.29055	2.18135	0.0908703	0.977518	-0.566337	-0.140069	0.0814612			2.23333	0.0423822	0.512312	0.42678	-0.243987	-0.263358	-0.0774888	0.161691			2.23333	-0.379062	0.26786	0.202644	-0.124851	-0.290256	-0.246044	0.0551787			2.23333	-0.23406	0.23458	0.126695	-0.0330171	-0.00383282	0.264138	-0.238707
2.26667	2.85404	1.31522	0.295879	0.996382	-0.388544	-0.105044	0.101676			2.26667	-0.127941	0.68845	0.347584	-0.0687258	-0.244041	0.00376873	0.0482727			2.26667	-0.384009	0.177371	0.419898	0.0462917	-0.1535	-0.115203	0.0302959			2.26667	-0.238132	0.141492	0.214294	-0.297752	-0.175545	0.106357	-0.203376
2.3	1.65649	0.822208	0.496321	0.52093	-0.582102	-0.380415	0.229699			2.3	0.0310364	0.304829	0.183569	-0.0946166	-0.181915	-0.177866	0.229663			2.3	-0.182189	0.310562	0.369001	-0.0489751	-0.380868	-0.227931	0.136903			2.3	-0.275077	0.347449	0.0729736	-0.0891582	-0.241996	0.135902	-0.190793
2.33333	1.76245	1.75544	0.165658	0.661191	-0.37994	-0.130407	0.249913			2.33333	-0.225024	0.703711	0.867652	-0.13883	-0.262313	-0.136042	0.450056			2.33333	-0.432506	0.250575	0.585947	-0.220807	-0.274675	-0.127644	0.0714929			2.33333	-0.334421	0.224108	0.195419	-0.272585	-0.35549	0.189333	-0.287588
2.36667	1.69112	2.1302	0.587627	1.54326	-0.089322	-0.339351	-0.0768836			2.36667	0.1055	0.839705	0.693738	-0.277446	-0.130752	-0.0296903	0.396434			2.36667	-0.400844	0.0797651	0.135694	-0.13288	-0.104133	-0.131934	0.0285384			2.36667	-0.234351	0.102512	0.302378	-0.16369	-0.0514654	0.277968	-0.297268
2.4	0.149969	1.74787	1.251	0.698767	-0.203339	-0.243937	0.0578779			2.4	-0.10555	0.477845	0.450413	-0.208138	-0.216371	-0.0165457	0.0714958			2.4	-0.158209	0.110267	0.324737	-0.0549721	-0.0564622	-0.075664	0.205614			2.4	-0.209042	0.186291	0.0139286	-0.0310811	-0.0738115	0.240251	-0.378092
2.43333	2.41194	1.38738	0.569626	1.09208	-0.356739	0.244001	-0.00276479			2.43333	-0.292549	0.750926	0.921594	-0.081472	-0.178782	-0.0631493	0.359154			2.43333	-0.134423	0.248542	0.570374	-0.179311	-0.26894	-0.219761	0.0861784			2.43333	-0.260532	0.316032	0.208003	-0.0214017	-0.254345	-0.141945	-0.119165
2.46667	2.64815	0.871752	0.481758	1.00332	-0.202238	0.123225	0.327401			2.46667	-0.100974	0.505013	0.597592	-0.0472165	-0.100994	-0.0930233	0.490643			2.46667	-0.394709	0.0411295	-0.0494035	-0.444597	-0.141858	-0.120912	0.196416			2.46667	-0.357402	0.268906	0.0298997	-0.201925	-0.166136	-0.0979421	-0.0668953
2.5	1.13718	1.81987	0.771433	0.701765	-0.458326	0.124432	-0.171217			2.5	-0.115317	0.494405	0.515742	-0.117321	-0.0947288	-0.175476	0.54928			2.5	-0.55762	0.472222	0.339428	-0.068016	-0.0805366	-0.301547	-0.112469			2.5	-0.264605	-0.101119	0.222038	-0.0785107	-0.170841	0.220764	-0.29872
2.53333	0.677054	1.01472	0.277437	1.59874	-0.516991	-0.338143	0.152211			2.53333	-0.232692	0.539429	0.524747	-0.0336736	-0.129708	0.0372276	0.350809			2.53333	-0.350268	-0.23237	0.439451	-0.334667	-0.24498	-0.168658	0.233631			2.53333	-0.336748	0.0751669	0.253496	-0.229995	-0.271987	0.0497817	-0.09303
2.56667	-0.230902	0.959969	0.156817	1.00604	-0.341509	0.161873	0.067985			2.56667	-0.138096	0.331369	0.419514	-0.0237155	-0.181393	0.154334	0.568155			2.56667	0.215934	0.123484	0.284663	-0.0390394	-0.128644	-0.296214	0.195628			2.56667	-0.307658	0.184545	0.0715217	-0.0451165	-0.18025	-0.0470245	-0.186437
2.6	0.833383	1.15849	0.225153	0.825466	-0.409639	-0.0917582	0.613769			2.6	0.193217	0.511095	0.671412	0.12685	-0.22107	-0.1934	1.26924			2.6	-0.336429	0.00656073	0.296884	-0.293275	-0.0963939	-0.171433	0.178028			2.6	-0.216606	0.000696487	0.0497428	-0.0915781	-0.0461728	-0.136287	-0.247418
2.63333	0.952902	1.49401	0.727762	0.649416	-0.279694	-0.113498	-0.00950284			2.63333	0.124605	0.508036	0.864341	-0.202562	-0.0775004	-0.0523945	0.847027			2.63333	-0.302409	-0.139848	0.349485	-0.117981	-0.301626	-0.0925439	0.206379			2.63333	-0.238424	0.19269	0.0139286	-0.157883	-0.174369	0.14093	-0.122552
2.66667	0.699231	0.891644	0.810962	0.652087	-0.232474	-0.225821	-0.0667765			2.66667	-0.0683156	0.52756	0.655883	-0.0683274	-0.297814	-0.120507	0.799076			2.66667	-0.302047	0.32073	0.484104	0.0161683	-0.211536	-0.171471	0.15346			2.66667	-0.43769	0.125783	0.0933005	-0.155947	-0.26787	0.272939	-0.26097
2.7	0.89246	1.18274	0.838194	0.401858	0.223431	-0.0217076	-0.100467			2.7	0.272639	0.285125	0.773594	-0.00698597	-0.118744	-0.0225205	0.376314			2.7	-0.357548	0.265826	0.347043	-0.158842	-0.232463	-0.135748	0.526206			2.7	-0.355074	-0.108682	0.116047	-0.184017	-0.139674	0.400547	-0.289524
2.73333	2.18964	0.94847	0.390508	0.423236	-0.34336	-0.136446	-0.00950284			2.73333	0.138261	0.0490299	0.755056	0.135214	-0.220026	-0.0750988	0.735803			2.73333	0.0820793	0.166187	0.758498	-0.0912008	-0.173325	-0.27791	0.343756			2.73333	-0.508379	-0.00686693	0.00666894	-0.196601	-0.356666	-0.00427896	-0.269197
2.76667	1.01456	0.693952	0.112882	0.785254	-0.264169	0.190859	0.15558			2.76667	0.150473	0.662814	0.579803	-0.000612925	-0.16051	-0.139627	1.18134			2.76667	-0.0448301	0.0096109	0.620108	-0.306482	-0.179795	0.067232	0.163043			2.76667	-0.232896	-0.0132667	0.0328036	0.0332875	-0.273163	-0.000507266	-0.179178
2.8	0.31817	1.00239	0.14332	0.810365	-0.304844	0.166704	0.18927			2.8	0.0763461	0.39547	0.472913	0.00775182	0.196587	-0.118118	0.501875			2.8	-0.163216	0.398001	0.403542	0.0285957	-0.0406254	-0.168354	0.128611			2.8	-0.357402	0.249707	0.332868	-0.201925	-0.262578	-0.127487	-0.143364
2.83333	1.70678	1.15221	0.31658	0.99497	-0.327849	-0.0180844	-0.029717			2.83333	0.0975588	0.563905	0.46406	-0.142415	-0.308256	-0.0105709	0.263674			2.83333	-0.200936	0.296328	0.58412	-0.0651655	-0.212341	-0.169182	0.24799			2.83333	-0.371947	0.0821485	0.144602	-0.092062	-0.251404	-0.0313093	-0.25129
2.86667	1.31703	0.617363	0.00806019	0.175972	-0.358559	-0.146108	-0.0431932			2.86667	0.0508878	0.561732	0.446956	-0.0922267	-0.15059	-0.133652	0.847741			2.86667	-0.230481	0.0960328	0.514286	-0.0804802	-0.273745	-0.166434	0.200944			2.86667	-0.277695	0.0623673	0.112176	-0.184017	-0.239055	0.141559	-0.193213
2.9	2.09974	0.891546	0.632108	0.573777	-0.279456	-0.0639795	0.421734			2.9	-0.0280988	0.305915	0.39002	-0.0559795	-0.239865	-0.0344701	0.430461			2.9	-0.201009	0.00859418	0.61092	-0.0523579	-0.0989812	-0.0240987	0.111084			2.9	-0.242787	0.265997	0.159121	0.0018292	-0.32844	0.213849	-0.20144
2.93333	0.671565	0.647666	0.785138	0.0921492	-0.489243	-0.384038	0.29708			2.93333	-0.0653658	0.447863	0.698463	-0.136839	-0.0628824	-0.19818	0.60345			2.93333	-0.505743	0.297345	0.337589	-0.043364	-0.193517	0.00413012	0.0971141			2.93333	-0.264313	0.253198	-0.00591446	0.0129606	-0.0438206	0.210706	-0.17095
2.96667	0.815325	0.663551	0.467591	0.480202	-0.157852	-0.0893426	0.128628			2.96667	0.269871	0.43351	0.387703	-0.118914	-0.2336	0.147164	0.346085			2.96667	-0.254923	0.37665	0.290895	-0.227043	-0.0324854	0.197878	0.0735006			2.96667	-0.328312	0.0757487	0.0778133	-0.155463	-0.156727	0.0152081	-0.12594
3	0.873812	0.175614	0.453968	0.632788	-0.631387	-0.184756	0.0983063			3	-0.112345	0.373467	0.34852	-0.338389	-0.290505	0.0384226	0.155939			3	0.112404	0.243458	0.266305	-0.0966897	-0.0839111	-0.233333	0.272785			3	-0.314639	0.129274	0.123307	-0.0252734	-0.380189	-0.0357096	-0.119165
3.03333	1.13565	0.500234	0.319344	0.814393	-0.58528	0.0350574	0.502591			3.03333	0.108934	0.496709	0.65441	-0.230046	-0.0299919	0.125655	1.07582			3.03333	-0.320497	0.105183	0.272771	-0.219893	-0.345395	0.105848	0.127759			3.03333	-0.193625	0.1956	0.18574	0.0526466	-0.136734	0.0981848	-0.230963
3.06667	0.232544	0.035125	0.820846	0.832457	-0.242176	3.21714e-05	0.0747232			3.06667	0.143123	0.155022	0.934897	-0.0946166	-0.433031	0.150749	1.35369			3.06667	-0.424927	0.0197782	0.146768	-0.0728513	-0.214614	-0.045132	0.257647			3.06667	-0.247441	-0.1209	0.0899127	-0.238707	-0.0367639	0.103214	-0.162239
3.1	-0.496123	0.20041	1.76981	0.220923	-0.453951	-0.143692	0.108413			3.1	0.0440681	0.416989	0.760528	-0.144805	-0.10256	-0.0571745	0.94622			3.1	-0.415947	-0.0788444	0.264674	0.224272	-0.210169	-0.143469	0.25357			3.1	-0.363801	-0.13079	0.0192523	-0.0954499	-0.0402923	0.262252	-0.0547959
3.13333	-0.186867	0.27956	0.451271	0.574931	-0.385285	0.0616283	0.290341			3.13333	-0.189071	0.312407	0.491477	-0.268285	-0.331749	-0.0308852	0.527783			3.13333	-0.271848	0.177371	0.0567338	-0.115709	-0.307844	-0.0904497	0.183555			3.13333	-0.189261	0.135092	0.0352235	-0.0456004	-0.173193	0.518097	-0.239675
3.16667	-0.108946	0.172715	1.01583	0.91204	-0.140467	-0.0470708	-0.346407			3.16667	-0.05995	0.341261	0.654153	-0.180256	-0.315565	0.470999	1.25087			3.16667	-0.376271	0.0787484	0.428686	-0.163053	-0.211041	-0.0666764	-0.0428149			3.16667	-0.273332	0.153128	0.194935	0.00424902	-0.175545	0.146588	-0.249838
3.2	-0.656957	0.572169	1.755	0.47151	0.206422	-0.117121	0.47227			3.2	-0.201086	0.571264	0.952585	-0.132059	-0.15059	0.0910009	0.566821			3.2	-0.234813	0.0960328	0.533948	-0.441634	-0.126292	-0.0579188	0.062081			3.2	-0.209042	0.104257	0.126695	0.0139286	-0.11968	0.230193	-0.231931
3.23333	0.0881145	0.431131	1.7421	0.95223	-0.305914	-0.241522	0.0275566			3.23333	0.0337641	0.2457	0.941885	-0.072709	-0.269101	0.166284	1.05808			3.23333	-0.504576	0.0268953	0.392321	-0.293029	-0.0411779	-0.178654	0.124835			3.23333	-0.270132	0.342213	0.10056	-0.0625396	-0.324323	-0.0375954	-0.254678
3.26667	-0.0402784	0.28734	1.37144	1.05404	-0.471105	-0.16664	0.165687			3.26667	0.0214845	0.269933	0.329682	-0.0754972	-0.00806495	-0.00459602	0.17546			3.26667	-0.158906	-0.0605434	0.0553709	-0.0250627	-0.077929	0.113385	-0.0526465			3.26667	-0.304167	-0.0691196	0.225426	-0.207248	-0.182602	0.0956704	-0.243546
3.3	-0.495525	0.750605	0.355608	0.174865	-0.497151	-0.15577	0.0949373			3.3	-0.0598945	0.314151	0.654905	-0.136839	-0.14798	0.0587369	0.276929			3.3	-0.311381	0.500691	0.131868	-0.0944976	-0.322258	-0.0756707	0.0569726			3.3	-0.159589	0.129856	0.231717	-0.244998	-0.157315	0.371002	-0.120617
3.33333	0.13518	-0.000457481	1.3145	0.887765	-0.193776	-0.216158	0.452055			3.33333	0.179492	0.562947	0.508151	-0.122499	-0.0795887	0.130435	0.546928			3.33333	-0.153957	0.257692	0.500645	-0.204182	-0.224688	0.1672	0.201318			3.33333	-0.278568	0.233416	0.153313	-0.139976	-0.0579339	0.0510389	-0.136588
3.36667	-0.484631	0.630846	0.644956	0.292977	-0.321579	-0.227028	0.350984			3.36667	-0.130529	0.288069	0.762258	-0.132855	-0.211151	-0.0177407	-0.0133171			3.36667	-0.0760656	-0.146965	0.111202	-0.369596	-0.216606	-0.152601	0.0729257			3.36667	-0.291076	0.16011	-0.00736637	-0.212088	0.0526206	0.160417	-0.216928
3.4	0.273463	0.426659	1.12061	0.29039	-0.563445	-0.233067	0.0713541			3.4	-0.129999	0.567384	0.329636	-0.154365	-0.104648	-0.20535	0.469482			3.4	-0.282914	0.158053	0.478347	-0.0967434	-0.256773	-0.0362696	0.104577			3.4	-0.266059	0.254943	0.206067	-0.422133	-0.204948	0.0334378	-0.0543119
3.43333	0.356373	0.319588	0.852241	0.30523	-0.151888	-0.228236	-0.12405			3.43333	-0.0730902	0.79926	0.61505	-0.107363	-0.26649	-0.035665	0.134908			3.43333	-0.160228	-0.0686772	0.108314	-0.244518	-0.27901	-0.208606	0.0754702			3.43333	-0.220097	0.169418	0.134922	-0.228543	-0.134969	0.22265	-0.163206
3.46667	0.0808428	0.290662	0.537496	0.470911	-0.121532	-0.0663951	-0.218383			3.46667	-0.256307	0.23762	0.429662	-0.268683	-0.203842	-0.0966081	0.273686			3.46667	-0.175692	0.21499	0.199943	-0.329295	-0.106529	0.0513876	-0.0254179			3.46667	-0.103446	0.132183	0.282535	-0.139492	-0.290216	-0.0137081	-0.353409
3.5	-0.268737	0.276014	0.491141	0.101527	-0.126222	-0.243937	-0.585608			3.5	0.11988	0.295742	0.455887	-0.0982015	-0.195488	-0.426418	0.450218			3.5	-0.241789	0.20889	0.328514	-0.395495	-0.148026	-0.175375	0.208359			3.5	-0.322784	0.0565493	0.177996	-0.0320491	-0.151435	0.079955	-0.106097
3.53333	-0.613634	0.217245	0.506251	0.22499	-0.319372	-0.222197	0.516067			3.53333	0.026084	0.218194	0.272378	-0.281827	-0.272233	-0.18862	0.173123			3.53333	-0.339332	0.185505	0.443019	-0.123814	-0.187552	-0.030745	0.160695			3.53333	-0.26955	0.125783	0.262692	-0.150623	-0.167901	0.0893842	-0.375672
3.56667	0.268532	-0.0141784	0.482393	0.339877	-0.579643	0.0072788	-0.157741			3.56667	-0.0227217	0.554709	0.321514	-0.31688	-0.0446099	0.226032	0.316578			3.56667	-0.353668	-0.122564	0.270441	-0.149037	-0.0539038	-0.0108799	0.0672758			3.56667	-0.309694	0.214799	0.169285	-0.0330171	-0.34667	0.0592109	-0.0964179
3.6	-0.456684	-0.119858	0.157285	0.132746	-0.0645259	-0.11229	0.53965			3.6	0.114367	0.35973	0.362704	-0.268683	-0.272755	0.148359	0.0548492			3.6	-0.25192	0.151953	0.196796	0.00997413	-0.140673	-0.1127	0.060686			3.6	-0.349838	0.252034	0.104916	0.17606	-0.18319	-0.0476531	-0.192729
3.63333	-0.203485	0.11451	0.41293	0.178227	-0.419084	-0.129199	0.185901			3.63333	0.151159	0.346276	0.409106	-0.314888	-0.293638	-0.0141557	0.140501			3.63333	-0.323818	0.0228283	0.366148	-0.20257	-0.266997	-0.0621603	0.230214			3.63333	-0.279731	0.0652763	0.205099	-0.268229	-0.330204	0.0101791	-0.0489882
3.66667	-0.24575	0.235429	0.265674	-0.11108	-0.402996	-0.5181	-0.16111			3.66667	-0.338401	0.290695	0.367293	-0.289396	-0.0279036	-0.1934	0.190325			3.66667	-0.113852	0.21499	0.227621	-0.166866	-0.136623	-0.232537	0.23978			3.66667	-0.166862	-0.0243209	0.260272	-0.104161	-0.28904	0.0680115	-0.260001
3.7	-0.27569	-0.111823	-0.0513881	-0.0718495	-0.345455	-0.137653	0.0511399			3.7	0.0625675	0.611578	0.30351	-0.256335	-0.122921	-0.0249105	0.301116			3.7	-0.304089	0.222107	0.26146	-0.130314	-0.182532	-0.0444716	-0.159817			3.7	-0.326857	0.0978571	0.0565184	-0.0722191	-0.264342	0.203792	-0.275973
3.73333	0.00548593	0.108758	0.491729	0.165175	-0.431234	-0.457712	-0.00950284			3.73333	0.0171762	0.328256	0.464226	-0.196188	-0.41267	-0.0332752	0.237234			3.73333	-0.119248	0.171271	0.393945	-0.0525492	-0.135571	-0.27067	0.311701			3.73333	-0.300385	0.180473	0.159121	-0.176274	-0.01677	-0.0998279	-0.29388
3.76667	-0.50128	0.115979	0.427563	0.622221	-0.328419	-0.0869271	0.108413			3.76667	0.262431	0.424912	0.419998	-0.137237	-0.380302	-0.069124	0.275468			3.76667	-0.102818	0.110267	0.241311	0.0255555	-0.241769	-0.0983502	0.338388			3.76667	-0.16948	0.0449133	0.19058	-0.224187	-0.110271	-0.0174798	-0.151107
3.8	-0.21683	0.24625	0.269204	0.0254374	-0.759627	-0.108667	0.192639			3.8	-0.166174	0.498433	0.457615	-0.0934217	-0.318697	0.108925	0.683889			3.8	-0.0186021	0.175338	0.0313243	-0.244615	-0.116894	-0.180402	0.0554541			3.8	-0.245114	0.333486	0.114596	-0.140944	-0.182602	0.165446	-0.147235
3.83333	-0.0951637	0.0823822	0.380108	0.329197	-0.404245	0.212599	0.0578779			3.83333	-0.0540287	0.283918	0.233211	-0.0794804	-0.201753	-0.119312	0.543659			3.83333	0.161024	0.087899	0.229738	-0.202924	-0.351657	-0.0440588	0.0465206			3.83333	-0.222715	0.370721	0.165413	-0.0673793	-0.133793	0.214478	-0.198053
3.86667	-0.983723	-0.0347119	0.00344906	0.617513	-0.492205	-0.355052	0.0444018			3.86667	-0.174558	0.470992	0.251768	-0.140424	-0.358897	-0.286607	0.264479			3.86667	0.217867	0.338014	0.473312	-0.279824	-0.146084	-0.160676	0.406668			3.86667	-0.278277	0.107748	0.282535	-0.235803	-0.11968	0.103214	-0.322918
3.9	0.589722	-0.226278	0.599185	-0.124542	-0.195165	-0.11229	-0.174586			3.9	-0.0672264	0.723996	0.46081	-0.14361	-0.132318	0.0850261	0.612208			3.9	0.52812	0.351231	0.450941	-0.222211	0.0407178	0.244052	0.27696			3.9	-0.393182	0.155455	0.163961	-0.139492	-0.226118	0.122072	-0.236287
3.93333	0.141298	0.101618	0.376103	0.242003	-0.45266	-0.167848	0.0814612			3.93333	0.0311142	0.166044	0.24428	0.100561	-0.222114	-0.103778	0.221477			3.93333	-0.0200601	0.272943	0.604665	-0.0864494	-0.0114251	0.117952	0.242787			3.93333	-0.321912	-0.059229	0.0526466	-0.209184	-0.169077	-0.110514	-0.282264
3.96667	0.104131	-0.100263	0.292419	-0.290774	-0.451041	-0.422687	-0.383466			3.96667	0.33362	0.264255	0.275568	-0.13405	-0.0848094	-0.0476147	0.484577			3.96667	-0.0154702	0.314629	0.2846	0.000905192	0.00876817	-0.0804642	0.21505			3.96667	-0.14039	0.0600401	0.162025	-0.106581	-0.0426445	0.108871	-0.354861
4	0.436343	0.51531	0.775077	0.238557	-0.618228	-0.154562	-0.275657			4	0.0725814	0.5444	0.183171	-0.107363	-0.10517	-0.216105	0.190836			4	-0.134351	0.479339	0.323611	-0.243037	-0.183583	0.0222723	0.0749412			4	-0.223588	-0.0295572	0.241397	-0.241611	-0.0408804	0.00703612	-0.177726
4.03333	0.344505	0.112598	0.222246	-0.00666907	-0.638618	0.0121099	0.276865			4.03333	0.148648	0.441297	0.319398	-0.211325	-0.363073	-0.0547845	0.0508133			4.03333	-0.156768	-0.00157306	0.244769	-0.0375181	-0.0674179	0.0319248	0.100512			4.03333	-0.300094	0.13742	0.0889448	-0.260001	-0.305506	0.0240086	-0.197569
4.06667	-0.481255	0.37489	0.490284	-0.455706	-0.42447	0.0362652	-0.0836217			4.06667	-0.214395	0.567522	0.326797	-0.0854553	-0.318175	-0.0488097	0.164602			4.06667	0.126389	0.153986	0.312792	-0.0658014	-0.117351	-0.092916	0.439518			4.06667	-0.389982	-0.0225756	0.156217	-0.120617	-0.256697	0.166075	-0.340341
4.1	-0.370644	0.0421721	0.364011	0.223524	-0.483545	-0.167848	0.313925			4.1	0.145576	0.354392	0.199587	-0.172289	-0.162076	-0.134847	0.110601			4.1	-0.246057	-0.136798	0.186356	-0.0225231	0.0429321	0.229874	0.221745			4.1	-0.223878	0.361994	0.324641	-0.218864	-0.166136	0.269167	-0.155463
4.13333	-0.236198	-0.0443228	0.0885154	0.263265	-0.490012	0.0821604	0.206116			4.13333	-0.177021	0.250722	0.193529	-0.0607593	-0.254483	-0.0296903	0.299152			4.13333	-0.277713	0.137719	0.353572	-0.034469	-0.0661237	-0.167968	0.119012			4.13333	-0.300385	0.201999	0.172188	0.00812085	-0.134969	-0.16206	-0.228059
4.16667	0.552045	-0.113002	-0.120642	-0.151654	-0.140223	-0.187172	-0.376728			4.16667	-0.0572562	0.400795	0.224528	0.0539571	-0.268578	-0.133652	0.0371368			4.16667	-0.341587	0.22414	0.121635	-0.102603	-0.241464	0.190225	-0.0393863			4.16667	-0.357983	0.12462	0.141214	-0.1332	-0.262578	-0.0319379	-0.190793
4.2	-0.285393	0.334641	0.519664	-0.0427618	-0.35542	-0.0688106	-0.437371			4.2	-0.419106	0.610971	0.425309	-0.197383	-0.126575	-0.180256	0.102497			4.2	-0.263401	0.0431629	0.314537	-0.0726203	-0.0664108	-0.0148433	0.0592235			4.2	-0.147372	0.345704	0.363843	-0.16853	-0.267282	0.145331	-0.29388
4.23333	-0.208434	0.821796	0.987804	0.214152	-0.561535	-0.208912	0.064616			4.23333	-0.05291	0.611142	0.630581	-0.124092	-0.142759	-0.0667341	0.608992			4.23333	-0.209323	0.26481	0.503726	0.147154	-0.116188	0.301201	0.318303			4.23333	-0.253259	0.0582947	0.101528	-0.0591518	-0.147318	0.328885	-0.2963
4.26667	-0.685361	0.269265	-0.118207	-0.0257039	-0.34662	-0.208912	0.165687			4.26667	0.11792	0.224358	0.69115	-0.122897	-0.10256	0.332383	0.0695918			4.26667	-0.114582	0.0767149	0.329808	0.00027756	-0.0665268	0.167229	0.0629886			4.26667	-0.16308	0.27007	0.230266	-0.112389	-0.261401	0.0856126	-0.171918
4.3	0.197929	0.0623952	0.584711	-0.208215	-0.661934	-0.106251	0.115152			4.3	-0.0983621	0.257072	0.551866	-0.0770905	-0.269101	-0.164721	0.382603			4.3	-0.158183	0.421386	0.168291	-0.154958	-0.160747	-0.0169663	0.14173			4.3	-0.252096	0.28636	0.328513	-0.148687	-0.162608	0.101328	-0.152559
4.33333	-0.245836	0.0103486	0.342823	0.0407594	-0.553149	-0.0398242	-0.285764			4.33333	-0.217131	0.381982	0.651737	-0.0595644	-0.177216	-0.161136	0.289072			4.33333	-0.095236	0.327847	0.201918	0.162694	-0.271349	-0.267336	0.0969154			4.33333	-0.142135	0.208981	0.249141	-0.116261	-0.0820443	0.255966	-0.190793
4.36667	-0.782907	-0.146767	-0.187957	-0.110441	-0.54973	-0.0253309	0.0444018			4.36667	0.0760904	0.346073	0.758093	0.108925	-0.204364	0.0491773	0.0618432			4.36667	-0.282095	0.0777316	0.156418	-0.262977	-0.225837	0.00511612	-0.034896			4.36667	-0.265477	0.0949481	0.315445	-0.228059	-0.333144	0.0491531	-0.296784
4.4	-0.699587	0.0171592	0.439429	-0.237716	-0.410029	-0.294663	0.131997			4.4	0.30112	0.34447	0.744972	-0.284616	-0.361507	0.116095	0.0614857			4.4	-0.290602	0.120434	0.195432	-0.179657	-0.303572	-0.189964	0.292774			4.4	-0.264605	0.249707	0.169769	-0.160787	-0.264342	0.230193	-0.221283
4.43333	0.989034	0.0974533	0.754703	-0.0177301	-0.353905	0.0845759	-0.225121			4.43333	-0.0269092	0.413688	0.608074	0.12924	-0.220026	0.0288629	0.236367			4.43333	-0.141005	0.289211	-0.00474084	-0.127906	-0.114237	-0.034107	0.338961			4.43333	-0.34722	0.0774941	0.108304	-0.110937	-0.174369	0.520612	-0.29146
4.46667	-0.711198	-0.208106	0.896019	-0.300682	-0.0819474	-0.202873	-0.528335			4.46667	-0.340068	0.403403	0.518545	-0.0440299	-0.250828	0.183013	0.239991			4.46667	-0.153826	0.0472298	0.328645	-0.0743841	-0.16256	0.21157	-0.0140226			4.46667	-0.299513	0.20549	0.126695	-0.0664113	-0.05911	-0.075312	-0.342761
4.5	-0.692268	0.224837	0.777582	-0.327983	-0.53566	-0.121952	0.0309256			4.5	-0.0372279	0.398496	0.311414	-0.113338	-0.345323	0.0778564	0.192529			4.5	-0.249688	0.201772	0.26704	0.168634	-0.14997	0.0868521	-0.00828954			4.5	-0.135154	0.244471	0.295118	-0.226607	-0.306682	0.152874	-0.0562479
4.53333	-0.435925	0.514622	0.423945	0.209842	-0.647407	-0.306741	0.138735			4.53333	-0.0919418	0.280266	0.552009	-0.115329	-0.219504	-0.0296903	0.00180924			4.53333	-0.14456	0.225157	0.166958	-0.242341	-0.39824	0.181101	0.0428682			4.53333	-0.377765	0.0786577	0.266564	-0.0301131	-0.327852	-0.0771979	-0.161754
4.56667	-0.035881	0.403399	1.19227	-0.122926	-0.402281	-0.0398242	-0.0667765			4.56667	-0.273078	0.399844	0.323172	-0.128872	-0.10517	-0.19579	-0.00614854			4.56667	0.0554851	0.232274	0.433526	-0.0709159	-0.246901	-0.120873	0.246342			4.56667	-0.395219	0.125783	0.2685	-0.014142	-0.419	0.0742976	-0.202892
4.6	-0.510472	0.650459	1.21578	-0.188473	-0.672823	0.048343	0.125259			4.6	-0.0825613	0.457631	0.443749	-0.0352668	-0.223158	-0.161136	-0.017151			4.6	-0.174645	0.0553636	0.138886	-0.192942	-0.251993	-0.109888	0.153061			4.6	-0.233187	-0.0423568	-0.0126901	-0.05286	-0.451344	0.293683	-0.209668
4.63333	-0.237483	0.00229296	1.5432	-0.140856	-0.264602	-0.194418	0.138735			4.63333	0.149495	0.443697	0.511028	-0.069124	-0.176694	-0.179061	0.268051			4.63333	-0.0878722	-0.0219077	0.245217	-0.3068	-0.255597	-0.199646	0.104304			4.63333	-0.161626	0.125783	0.142666	-0.153527	-0.223766	0.0101791	-0.110937
4.66667	-0.420732	0.531658	1.23323	-0.402739	-0.235119	-0.119537	-0.0566694			4.66667	-0.0277368	0.232815	0.438084	-0.219291	-0.252916	-0.0117658	0.0850771			4.66667	-0.3077	0.0584139	0.411741	-0.094016	-0.282429	-0.196326	0.213714			4.66667	-0.173262	0.174073	0.149442	-0.12594	-0.10439	-0.123087	-0.0881903
4.7	-0.377124	0.263408	1.02386	-0.27703	-0.255567	0.021772	-0.177955			4.7	-0.00773623	0.240972	0.730642	-0.0535895	-0.121354	-0.144407	0.254155			4.7	-0.28224	0.305479	0.187368	-0.329684	-0.178359	-0.121092	-0.254464			4.7	-0.28264	0.0984389	0.219134	-0.0494722	-0.11968	-0.00490754	-0.189341
4.73333	-0.356857	0.565499	0.182336	-0.231112	-0.409644	-0.235483	0.350984			4.73333	-0.115792	0.53158	1.42207	-0.0858535	-0.193922	-0.133652	0.386616			4.73333	-0.130343	0.083832	0.257034	-0.0374666	-0.2568	-0.0340306	0.0623977			4.73333	-0.371947	0.136838	-0.0436646	-0.182565	-0.0202984	0.378546	-0.176758
4.76667	-0.00682895	0.382832	0.914225	-0.00859233	-0.436014	-0.196834	-0.0701455			4.76667	-0.132124	0.457956	1.1227	-0.253945	-0.154245	-0.0488097	0.721043			4.76667	-0.359739	-0.153066	0.0578427	-0.18995	-0.134029	0.346909	0.205951			4.76667	-0.318712	0.283451	0.191064	-0.132716	-0.177897	0.13213	-0.257582
4.8	0.741938	0.196286	0.339039	-0.341041	-0.584427	-0.154562	0.216223			4.8	0.505907	0.7157	1.31674	-0.171891	-0.254483	-0.103778	0.883057			4.8	-0.325232	0.372583	0.323275	-0.146031	-0.213742	0.0926184	0.212669			4.8	-0.23086	0.0402589	0.277211	-0.117229	-0.381365	0.0711545	-0.113357
4.83333	-0.607361	0.331132	0.654976	-0.185941	-0.388799	-0.127991	0.879923			4.83333	0.320038	0.255507	1.35557	-0.0623526	-0.138061	0.0121334	1.39636			4.83333	-0.0385933	0.083832	0.531675	-0.10385	-0.322943	-0.175185	0.11002			4.83333	-0.373401	-0.070865	0.202195	-0.0610876	-0.286688	0.127101	-0.0557639
4.86667	-0.66611	0.0262134	0.186126	0.248945	-0.0216409	0.101485	0.425103			4.86667	-0.0124628	0.369691	1.43157	-0.0129609	-0.244041	-0.0750988	1.33899			4.86667	-0.0971125	0.0594306	0.320599	-0.138105	-0.200274	0.259475	0.0353367			4.86667	-0.29544	0.140328	-0.0102702	-0.185469	-0.193187	0.194362	-0.328242
4.9	-0.742951	0.433318	0.356382	-0.319842	-0.374739	0.0181487	-0.390204			4.9	-0.0768151	0.564565	1.18872	-0.0197323	0.00550894	0.259491	0.617924			4.9	0.0964473	0.10315	0.32149	-0.201065	-0.0869216	0.310851	0.306686			4.9	-0.23726	0.103093	0.192032	-0.108517	-0.0820443	0.145959	-0.185953
4.93333	0.175262	0.00018143	0.106531	0.0249301	-0.226513	-0.207704	0.324032			4.93333	0.379967	0.326922	1.2213	-0.0153507	-0.153201	-0.0786838	0.561612			4.93333	0.10691	0.353265	0.430945	0.143036	0.0075716	0.133077	0.24638			4.93333	-0.31813	0.0507312	0.0178003	-0.377124	-0.307858	0.157903	-0.190793
4.96667	-0.12857	0.528539	0.475343	-0.126061	-0.163405	0.117186	-0.562025			4.96667	0.229408	0.520917	1.0693	-0.0543862	-0.289461	0.0742715	0.502989			4.96667	-0.188606	0.219057	-0.016227	-0.113207	-0.0595845	-0.223359	0.111255			4.96667	-0.312603	0.233416	-0.0852864	-0.283716	-0.279043	0.0673828	-0.104161
5	0.0480187	0.448733	0.308646	-0.139533	-0.473284	-0.153354	-0.103836			5	-0.0316875	0.0979969	1.14621	-0.189417	-0.217938	-0.0332752	0.741372			5	-0.232369	0.216007	0.33988	-0.189392	-0.222224	0.0439732	0.0659712			5	-0.225333	0.128111	0.0342556	-0.21354	-0.0555817	-0.102971	-0.305495
5.03333	-0.442654	1.0421	0.371841	0.0767206	-0.441415	-0.077265	0.367829			5.03333	-0.0692267	0.649568	0.999164	-0.0145541	-0.289461	0.179428	0.562088			5.03333	-0.240328	0.15907	0.223615	0.00691059	-0.190194	0.27244	0.196855			5.03333	-0.260532	0.110657	0.134438	-0.184501	-0.329028	-0.00427896	-0.0659274
5.06667	-0.519808	0.435036	0.600317	-0.273797	-0.403325	-0.124368	-0.0431932			5.06667	0.0996477	0.197224	0.796622	-0.114533	-0.122921	0.0276679	0.245906			5.06667	-0.253538	0.357332	-0.019334	-0.0118919	-0.00778052	-0.0427376	0.398157			5.06667	-0.378346	0.0100052	0.0211881	-0.231931	-0.296685	-0.145088	-0.033985
5.1	-0.502373	0.390522	0.534318	-0.500866	-0.368954	-0.136446	0.0410328			5.1	0.167976	0.604563	1.07444	-0.146398	-0.0200726	0.10773	0.454214			5.1	-0.214649	0.217023	0.275654	-0.137683	-0.213927	-0.0856338	0.153032			5.1	-0.295731	0.0571311	0.272371	0.0724895	-0.223178	-0.0281662	-0.111905
5.13333	-0.749113	0.467099	0.379306	0.0575586	-0.0631117	-0.136446	0.441948			5.13333	-0.0640496	0.487272	0.767875	0.0443974	-0.198621	-0.120507	0.420822			5.13333	-0.226644	0.281077	0.427167	0.16831	-0.198062	-0.0874523	0.164808			5.13333	-0.298931	0.146147	0.272855	-0.0988377	-0.140262	0.174875	-0.309367
5.16667	-0.237333	0.358075	0.212832	-0.173203	0.298702	-0.0120455	-0.636144			5.16667	-0.190196	0.156007	1.07762	-0.0926251	-0.0237271	0.0874161	0.27181			5.16667	-0.367037	-0.00564007	0.147276	-0.106284	-0.133341	0.153751	0.0340567			5.16667	-0.263441	0.322432	0.116531	-0.0281773	-0.166724	0.171104	-0.224671
5.2	-0.177807	0.406764	0.30483	-0.344601	-0.32786	-0.376792	-0.184693			5.2	-0.0150611	0.703267	0.660986	-0.18623	-0.114045	-0.0894384	0.15324			5.2	-0.23238	0.262776	0.159844	-0.0545352	-0.0905456	0.0903029	0.278256			5.2	-0.386201	0.0786577	0.155733	-0.187889	-0.114975	0.262881	-0.175306
5.23333	-0.341885	0.444526	1.57616	0.0342803	-0.0311696	0.0266031	-0.322823			5.23333	-0.0705788	0.538655	0.838729	-0.159941	-0.278498	-0.127677	0.397681			5.23333	-0.320163	0.147886	0.22309	-0.00620149	-0.12853	0.310333	0.124619			5.23333	-0.284967	0.208399	0.0545825	-0.131264	-0.0667548	0.0673828	-0.263873
5.26667	-0.185506	0.479641	1.05912	-0.438122	0.0386633	0.0700828	-0.417156			5.26667	0.0325893	0.521661	1.00673	-0.106566	-0.0973391	0.261881	0.576667			5.26667	-0.343958	0.177371	0.376298	-0.0309414	-0.266611	0.0684812	0.0514099			5.26667	-0.303585	0.20549	0.13831	-0.249354	-0.271987	0.227679	-0.207732
5.3	-0.34859	0.142884	1.73484	-0.253025	-0.147271	-0.16664	0.276865			5.3	-0.0495795	0.354414	0.888156	-0.296167	-0.259181	-0.182645	0.804459			5.3	0.0682018	0.371566	0.454464	-0.298263	-0.0427941	-0.0365634	-0.0234477			5.3	-0.130209	0.340468	0.131535	-0.0697992	-0.230823	0.119558	-0.0659274
5.33333	-0.642981	0.260179	2.14345	-0.349607	-0.424109	0.0459273	-0.130788			5.33333	-0.231163	0.185969	1.05042	-0.0902351	-0.114568	0.174648	0.396655			5.33333	-0.234439	0.32073	0.0816031	-0.248518	-0.223126	-0.170047	0.0344468			5.33333	-0.278568	0.0466587	0.112176	-0.122552	-0.199656	0.0755547	-0.200957
5.36667	-0.678233	0.0443217	2.26089	-0.137012	-0.392719	-0.153354	-0.434002			5.36667	-0.0856283	0.322475	0.574501	-0.163526	-0.120832	-0.155161	0.422952			5.36667	-0.181379	0.111284	0.233601	-0.305392	-0.238465	0.039592	0.23209			5.36667	-0.273622	0.246216	0.285439	-0.111421	-0.271398	0.352773	-0.237255
5.4	-0.204286	0.259183	1.058	-0.37319	-0.656379	-0.0869271	0.36446			5.4	-0.0051313	0.616201	0.862779	-0.3121	-0.302513	-0.110948	0.271069			5.4	0.0426623	-0.0391921	0.370118	0.138473	-0.109305	-0.0749334	0.331034			5.4	-0.106064	0.149056	0.362391	-0.219348	-0.0673429	0.219507	-0.106097
5.43333	-0.494978	0.153432	1.24045	-0.230149	-0.008	-0.468582	-0.181324			5.43333	0.191899	0.387369	0.976089	-0.110549	-0.169385	-0.035665	0.482658			5.43333	-0.137822	0.166187	0.459856	-0.275112	-0.283241	0.0141718	0.0679492			5.43333	-0.204388	-0.00570333	0.200259	-0.166594	-0.144966	0.139673	-0.130296
5.46667	-0.0173374	0.340322	1.96436	-0.440917	-0.279296	-0.143692	0.0915683			5.46667	0.165057	0.27493	0.757605	-0.0778872	-0.320786	0.0766614	0.373019			5.46667	-0.166138	0.10315	0.175466	-0.118701	-0.261097	-0.157949	0.205881			5.46667	-0.257041	-0.0813374	-0.014626	-0.146751	-0.250228	0.0208655	-0.0456004
5.5	0.000357976	0.270121	1.79049	-0.183622	-0.431613	-0.486698	-0.117312			5.5	-0.0253254	0.544562	0.477787	0.0543554	-0.33958	-0.167111	0.217054			5.5	0.0676155	0.104167	0.20909	-0.220943	-0.354638	-0.0866782	0.0321889			5.5	-0.142426	0.0513131	0.106368	-0.194181	-0.0749876	0.252195	-0.299687
5.53333	-0.289077	0.3132	1.21051	-0.462527	-0.394844	-0.0204999	0.101675			5.53333	0.133659	0.454068	0.450398	-0.18145	-0.198621	-0.0237155	0.343872			5.53333	-0.312677	0.0950161	0.185945	-0.142887	-0.168704	0.205271	0.213103			5.53333	-0.122064	0.102512	0.164445	-0.115293	-0.119092	0.251566	-0.171434
5.56667	0.0845243	0.126535	0.468737	-0.130283	-0.155466	0.0241875	-0.0937288			5.56667	0.118331	0.581529	0.659308	-0.115728	-0.304079	0.11251	0.0961103			5.56667	-0.0776471	0.181438	0.112484	-0.0185186	-0.118147	-0.232815	-0.0247446			5.56667	-0.24046	0.258434	0.148474	-0.301139	-0.288452	0.0510389	-0.32437
5.6	-0.0351444	0.341498	0.813464	-0.471947	-0.624751	-0.19925	-0.12405			5.6	-0.368035	0.485289	0.469133	-0.239605	-0.0498306	-0.279438	0.0605108			5.6	-0.253529	0.00249384	0.280835	-0.303522	0.101752	0.218853	0.0829386			5.6	-0.299803	-0.00919411	0.122823	-0.171434	-0.181426	0.108243	-0.301623
5.63333	-0.386691	0.0944886	1.01374	-0.29663	-0.261902	-0.0760572	0.192639			5.63333	-0.116214	0.597785	0.530513	-0.181052	-0.299381	-0.0643442	0.385946			5.63333	0.0037963	0.295312	0.271003	-0.121117	-0.166519	-0.000844286	0.0756574			5.63333	-0.218351	0.13742	0.157669	-0.197569	-0.136145	0.101328	-0.311303
5.66667	-0.706615	-0.0363644	0.85515	-0.384254	-0.394655	-0.243937	-0.0465622			5.66667	0.0319833	0.462812	0.601832	-0.0978032	-0.362029	-0.217299	0.308857			5.66667	-0.256231	0.0685811	0.184491	-0.192465	-0.240789	0.130361	0.305983			5.66667	-0.235805	0.135674	0.317865	-0.205796	-0.171429	0.416262	-0.103678
5.7	-0.624178	0.515392	0.97001	-0.493634	-0.327927	-0.275339	0.276865			5.7	0.0149062	0.350761	0.335708	-0.0245122	-0.14798	-0.0249105	0.523814			5.7	-0.120884	0.0451964	0.218554	-0.0398991	-0.193685	0.492151	0.333863			5.7	-0.270423	-0.0173394	-0.0625396	-0.286136	-0.000304485	-0.00113585	-0.1332
5.73333	-0.0673334	0.553367	0.670867	-0.16191	-0.340608	-0.336935	-0.393573			5.73333	0.104578	0.423115	0.608349	0.00655684	-0.131274	-0.0846586	0.384483			5.73333	-0.13866	0.370549	0.252914	-0.041107	0.00447611	0.178306	0.121219			5.73333	-0.273041	0.200836	-0.00639836	-0.20628	-0.234939	-0.0658829	-0.33405
5.76667	-0.699847	0.478924	1.05604	-0.23965	-0.184082	0.064044	-0.134157			5.76667	0.0360673	0.506366	0.615249	-0.152772	-0.185047	0.277415	0.269364			5.76667	-0.0280688	0.16517	0.267117	-0.0400047	-0.121284	0.533711	0.114395			5.76667	-0.350711	0.118802	0.138794	-0.341793	0.00792829	-0.0489104	-0.165626
5.8	-0.208873	0.061185	0.275977	-0.526631	-0.329248	-0.295871	0.337508			5.8	-0.0808217	0.571454	0.457268	0.00854844	-0.229423	0.184208	0.322815			5.8	-0.206171	0.236341	0.292127	-0.0846611	-0.385109	0.129122	0.524839			5.8	-0.384455	0.331741	0.0860409	-0.121585	-0.243172	0.106357	-0.141911
5.83333	-0.379693	0.22615	-0.0443897	-0.307167	-0.455378	-0.0990048	0.0848302			5.83333	-0.120168	0.537192	0.524286	-0.185434	-0.318175	-0.0655391	0.489341			5.83333	-0.184165	0.425453	0.418209	-0.297382	-0.19397	0.165566	0.49072			5.83333	-0.220679	-0.0121032	0.204131	-0.0877063	-0.0532295	-0.00553612	-0.0959339
5.86667	-0.348858	0.0119926	-0.171325	-0.0556292	-0.266224	-0.196834	0.0410328			5.86667	0.0300312	0.178146	0.542369	-0.106168	-0.392831	0.089806	0.1919			5.86667	-0.0604915	0.311579	0.492278	-0.164368	-0.303626	-0.00693501	-0.14499			5.86667	-0.412091	0.236907	0.110724	-0.24403	-0.263166	0.0202369	-0.172886
5.9	-0.751003	0.270512	0.556883	-0.374736	-0.351469	-0.283793	0.391413			5.9	-0.242356	0.637946	0.456217	-0.10338	-0.174606	-0.0523945	0.641921			5.9	0.652089	0.539326	0.383584	-0.113272	-0.131832	-0.102045	0.0477355			5.9	-0.357693	0.216544	0.128147	-0.189341	-0.149671	0.0504103	-0.227575
5.93333	-0.520145	0.125393	0.406909	-0.124754	-0.331502	-0.21495	-0.12405			5.93333	0.0602644	0.397113	0.302063	-0.113736	-0.274843	-0.0476147	0.224707			5.93333	0.671905	0.348181	0.32802	-0.00872528	-0.154392	-0.182777	0.18011			5.93333	-0.294858	0.190363	0.0463549	-0.115777	-0.28316	0.0170939	-0.193697
5.96667	-0.551884	-0.149929	0.405445	-0.330725	0.0569883	-0.28017	-0.349776			5.96667	0.239944	0.146589	0.0902903	-0.0157491	-0.318175	-0.0129608	0.326946			5.96667	1.02884	0.123484	0.41027	-0.239471	-0.0715409	0.0622947	0.298156			5.96667	-0.283222	0.0990206	0.14073	-0.104161	0.0191014	0.0780692	-0.271617
6	-0.460629	-0.00425902	0.698644	-0.23164	-0.43285	-0.0168766	0.0410328			6	0.290828	0.377236	0.443672	-0.221681	-0.305646	-0.179061	0.383738			6	1.46489	0.181438	0.369843	-0.173935	-0.287684	-0.16053	0.139149			6	-0.357402	0.048404	0.131051	-0.0886742	-0.0738115	0.147217	-0.201925
6.03333	0.129436	0.343209	0.838569	-0.444674	-0.265135	0.00365552	-0.00613381			6.03333	0.0632524	0.214841	0.351364	-0.000214565	-0.491503	-0.0464198	0.206336			6.03333	0.526538	0.392917	0.319735	0.18235	-0.192328	-0.268975	0.111021			6.03333	-0.347511	0.284033	0.241397	-0.106097	-0.193775	0.105728	-0.232415
6.06667	-0.416549	0.0445969	0.800464	-0.359262	-0.382402	0.105108	-0.204907			6.06667	-0.207029	0.723513	0.271796	0.0288629	-0.329661	0.145969	0.344024			6.06667	1.1597	0.268877	0.345229	-0.0407047	-0.217337	-0.0400009	0.0632767			6.06667	-0.264023	0.261925	0.217198	-0.228543	-0.16202	0.117043	-0.208216
6.1	-0.58617	0.000656798	0.413951	-0.334952	-0.463956	-0.333312	0.310556			6.1	0.321049	0.439792	0.280894	-0.311702	-0.303035	-0.122897	0.119587			6.1	1.10536	0.191605	0.368988	-0.00664518	-0.176337	-0.262869	0.545503			6.1	-0.349547	0.257852	-0.0199498	-0.115293	-0.110859	0.123329	-0.235803
6.13333	-0.24509	0.400205	0.385271	-0.169182	-0.199203	-0.153354	0.00734235			6.13333	-0.326226	0.393566	0.25479	-0.329228	-0.343235	-0.229249	0.331856			6.13333	1.89236	0.199739	0.409389	-0.0672583	-0.0759602	-0.0684159	0.51387			6.13333	-0.316676	0.196181	-0.00397854	-0.12594	-0.335496	-0.19852	-0.239191
6.16667	-0.459094	0.318522	0.446598	-0.11685	-0.348685	-0.0567329	0.0545089			6.16667	-0.127946	0.375087	0.372821	-0.241995	-0.127619	-0.144407	0.3046			6.16667	1.5036	0.023845	0.348043	0.00174881	-0.0426217	0.0740158	0.071267			6.16667	-0.237842	0.164182	0.0540985	-0.164174	-0.149671	0.0749262	-0.148687
6.2	-0.680403	-0.0298314	0.360821	-0.331494	-0.2575	-0.34539	0.135366			6.2	0.0899826	0.506169	0.318524	-0.159145	-0.230467	-0.153966	0.335214			6.2	2.0203	0.241425	0.512634	-0.193448	-0.190757	0.158841	0.0467332			6.2	-0.205552	0.238071	0.150894	-0.153527	-0.265518	0.250937	-0.13562
6.23333	-0.495503	0.537458	0.792622	-0.362059	-0.142815	-0.0531096	0.0208185			6.23333	-0.345534	0.526781	0.297725	-0.187425	-0.254483	-0.0834636	0.421293			6.23333	4.38187	0.27701	0.316709	0.089707	-0.0724576	0.0836949	-0.184798			6.23333	-0.263441	0.0745851	0.207519	-0.349537	-0.311386	0.0893842	-0.0973858
6.26667	-0.30919	0.178952	0.713112	-0.221939	-0.0265749	-0.0325776	-0.0162409			6.26667	-0.0305209	0.506099	0.133403	-0.242394	-0.402229	-0.071514	-0.142231			6.26667	4.28392	0.248542	0.131993	0.108277	-0.0395316	0.00657632	0.0901376			6.26667	-0.246278	0.242144	0.0376434	-0.179178	-0.186718	0.298083	-0.387771
6.3	0.505958	0.359364	0.672021	-0.0878667	-0.477756	-0.368337	-0.248704			6.3	-0.0574947	0.429734	0.177781	-0.202163	-0.389177	-0.164721	0.154456			6.3	2.56941	0.247525	0.389619	0.125144	0.0443459	0.557411	-0.0322337			6.3	-0.243078	0.363158	0.147506	-0.0606037	-0.384893	0.162303	-0.153527
6.33333	-0.514272	0.0229513	0.440833	-0.0560707	-0.0800893	0.0181487	0.0983063			6.33333	-0.224984	0.503062	0.483447	-0.314091	-0.285807	-0.185035	0.146502			6.33333	2.16378	0.0939993	0.120972	0.0974143	-0.173766	-0.087599	-0.0903031			6.33333	-0.236969	0.0740033	0.168801	-0.158367	-0.069695	0.210706	-0.266293
6.36667	-0.550256	-0.0289341	0.247663	-0.565252	-0.296407	-0.18838	0.418365			6.36667	0.283001	0.19131	0.295718	-0.267886	-0.141193	-0.19101	0.139752			6.36667	3.01249	0.405118	0.371638	-0.189334	-0.171907	0.222359	0.213269			6.36667	-0.373692	0.30556	0.064746	-0.0998057	-0.27081	0.227679	-0.164658
6.4	-0.222129	-0.05014	-0.22537	-0.254869	-0.706432	-0.283793	0.256651			6.4	-0.286774	0.717356	0.440965	-0.313693	-0.0848094	-0.00101118	0.0206714			6.4	3.25073	0.132635	0.246684	0.077474	-0.302864	-0.0752631	0.237723			6.4	-0.218351	0.190945	0.0942685	-0.111421	-0.178485	0.0887557	-0.190309
6.43333	-0.586797	-0.248558	0.0568727	0.00342922	-0.372373	-0.229444	-0.0634074			6.43333	-0.274978	0.290548	0.109526	-0.180256	-0.265968	0.210497	0.0847933			6.43333	3.10694	0.421386	0.303178	-0.0758252	-0.304606	0.318093	0.187318			6.43333	-0.206715	0.256689	0.0661979	-0.252258	-0.262578	0.497982	-0.190309
6.46667	-0.421533	0.219751	0.317754	-0.441763	-0.0339105	-0.28017	0.175794			6.46667	-0.0327993	0.495845	0.424309	-0.107761	-0.115089	-0.0332752	0.085044			6.46667	3.63063	0.27396	0.294469	-0.0611114	-0.353204	-0.0542455	-0.0561946			6.46667	-0.133118	0.154873	0.0139286	-0.101742	-0.0873368	0.140302	-0.145783
6.5	-0.127646	0.430019	0.477361	-0.180335	-0.29341	-0.504815	-0.198169			6.5	-0.191318	0.272406	0.228928	-0.265895	-0.172517	0.0874161	0.366599			6.5	3.75305	0.559661	0.213052	-0.086811	-0.178621	0.210892	0.587988			6.5	-0.259659	0.080403	0.10298	-0.273069	-0.203772	-0.00679338	-0.308883
6.53333	-0.0273405	0.0235298	0.563937	-0.0851374	-0.0808661	-0.218574	-0.171217			6.53333	-0.0896888	0.682549	0.463754	-0.0766922	-0.185047	0.0611269	0.0959614			6.53333	1.91541	0.268877	0.616839	0.0537552	0.0764848	0.47126	0.315377			6.53333	-0.276822	0.175236	0.197839	-0.073187	-0.113799	0.157274	-0.272585
6.56667	-0.557536	-0.0127427	0.974102	-0.309383	-0.108713	0.198106	-0.218383			6.56667	-0.159874	0.501499	0.0481785	-0.148788	-0.20593	0.0563471	-0.00359129			6.56667	1.69233	0.520008	0.50588	0.137876	-0.284863	0.120675	0.225415			6.56667	-0.205261	0.155455	0.303346	-0.365024	-0.309034	0.15476	-0.187405
6.6	-0.277764	0.203492	0.977428	-0.391118	-0.194623	-0.0156688	0.067985			6.6	0.0349074	0.461539	0.403133	-0.151577	-0.200187	-0.0942183	-0.0740461			6.6	3.8499	-0.0981623	0.539549	-0.0838031	-0.347696	-0.362171	0.1306			6.6	-0.0726104	0.138001	0.286891	-0.211604	-0.107919	0.0535534	-0.127876
6.63333	-0.365147	0.493568	0.23103	-0.16675	-0.244162	0.0990692	-0.0431932			6.63333	0.0354825	0.218765	0.479841	-0.104176	-0.0472203	-0.0798787	0.0504793			6.63333	3.37544	0.363432	0.393444	-0.13624	0.0428914	-0.0799844	0.16576			6.63333	-0.335875	0.0274593	-0.0886742	-0.197569	-0.192599	-0.00930781	-0.397451
6.66667	-0.478379	-0.117002	0.5006	-0.170167	-0.302211	-0.0712262	0.15558			6.66667	0.227085	0.126907	0.30353	-0.071514	-0.0211167	-0.167111	0.21084			6.66667	3.02972	0.0807818	0.109841	-0.0573681	-0.187246	0.291887	0.391409			6.66667	-0.286422	0.0559675	0.00328112	-0.0722191	-0.130265	-0.030052	-0.225155
6.7	-0.396745	-0.261923	0.0912985	-0.287203	-0.228085	-0.328481	0.273496			6.7	0.0760261	0.488935	0.251293	-0.207341	-0.169907	-0.231639	-0.0884641			6.7	2.94265	0.116367	0.254223	-0.310846	-0.0292721	0.402417	0.620388			6.7	-0.297767	-0.0638833	0.0192523	-0.247902	-0.131441	-0.0206228	-0.130296
6.73333	-0.652599	-0.550126	0.16914	-0.0854083	-0.369362	-0.204081	0.165687			6.73333	-0.1606	0.473687	0.277969	-0.0794804	-0.201231	0.00735357	-0.00753798			6.73333	3.19483	0.0889157	0.257956	-0.165899	-0.285704	-0.049391	0.288643			6.73333	-0.301258	0.19909	0.0163484	-0.0770588	-0.272574	0.0227514	-0.0180139
6.76667	-0.817689	-0.120136	0.292147	-0.393524	-0.243629	-0.172679	0.0915683			6.76667	-0.01316	0.350037	0.325952	-0.0683274	-0.240909	-0.0906334	0.1377			6.76667	4.22373	0.126535	0.252437	-0.345681	-0.0981234	-0.0450875	0.107295			6.76667	-0.336166	0.123456	0.195419	-0.214508	-0.262578	0.211335	-0.17579
6.8	-0.603122	-0.0260623	1.07067	-0.209913	0.00537421	-0.508438	-0.413787			6.8	-0.0585367	0.286228	0.433283	-0.100193	-0.0900301	-0.0894384	0.337174			6.8	4.66892	0.247525	0.085197	0.0329676	-0.123595	-0.224204	0.197606			6.8	-0.304749	0.0885483	0.120887	-0.279845	-0.165548	0.198763	-0.146267
6.83333	-0.244434	0.0714848	0.287896	-0.394245	-0.174931	-0.170263	-0.103836			6.83333	0.0785074	0.451168	0.248432	-0.195392	-0.142237	-0.100193	-0.0125526			6.83333	4.80995	0.0462131	0.196205	-0.211811	-0.0339789	-0.0544008	0.387165			6.83333	-0.254132	0.0524767	0.156701	-0.346633	-0.112623	0.0453814	-0.137556
6.86667	-0.578688	0.240795	0.560229	-0.426901	-0.0467421	-0.30191	0.0949373			6.86667	-0.195713	0.43652	0.283321	-0.329626	-0.103604	-0.0822686	0.323268			6.86667	4.7504	0.147886	0.203271	0.0338885	-0.0804378	0.0578882	0.0628793			6.86667	-0.325694	0.0152415	0.0962044	-0.283716	-0.360783	0.0981848	0.0705537
6.9	-0.134081	0.0720059	0.643831	-0.415922	-0.187505	-0.0277465	0.152211			6.9	0.377917	0.302641	0.33095	-0.0798787	-0.424156	-0.158746	0.386705			6.9	4.57032	0.0523134	0.395091	-0.0363401	-0.0451218	-0.0572295	-0.134708			6.9	-0.322784	0.132765	0.112176	-0.137072	-0.340789	-0.00679338	-0.206764
6.93333	-0.487829	0.255113	0.48069	-0.273116	-0.0747309	0.189652	-0.16111			6.93333	0.154406	0.703944	0.381059	-0.132059	-0.181915	0.0408126	0.538213			6.93333	4.08605	0.345131	0.223932	0.0633164	-0.16986	0.177765	0.184286			6.93333	-0.359438	0.0286228	0.044903	-0.24645	-0.212593	-0.0683973	-0.277909
6.96667	-0.596181	0.0514663	0.241803	-0.384822	-0.492415	-0.193211	0.586817			6.96667	-0.00833849	0.247921	0.19584	-0.070319	-0.211151	-0.0631493	0.09348			6.96667	5.02663	0.10315	-0.0058827	0.0204084	-0.0430526	0.291344	0.0471026			6.96667	-0.209915	0.0815667	0.136858	-0.123036	-0.321971	0.200649	-0.198537
7	-0.426518	-0.209033	0.485768	-0.420443	-0.289937	-0.1449	0.310556			7	0.0783993	0.535871	0.212659	-0.0982015	-0.376125	-0.165916	0.153831			7	5.68476	0.00452728	0.371327	0.0575828	-0.0940368	0.158319	0.310231			7	-0.215442	0.129274	0.0328036	-0.134652	0.0226297	0.449579	-0.00397854
7.03333	-0.424391	0.519797	0.285127	-0.172592	-0.168588	-0.121952	-0.134157			7.03333	0.110273	0.320686	0.400118	-0.160738	-0.246651	0.113705	0.343891			7.03333	3.79199	0.380717	0.317349	-0.139118	-0.198494	0.053356	-0.131604			7.03333	-0.269259	0.0559675	0.0182843	-0.21596	0.077907	0.123329	-0.183533
7.06667	-0.408273	-0.0160952	0.592814	-0.306036	-0.249383	-0.329689	0.0949373			7.06667	0.284535	0.274818	0.403788	-0.347152	-0.105692	-0.126482	0.115129			7.06667	4.45208	0.274977	0.108985	0.0936409	-0.0702266	0.182342	0.0572486			7.06667	-0.333839	0.178727	-0.113841	-0.161271	-0.271987	0.0409811	-0.24403
7.1	-0.14046	0.274858	0.995524	0.0813434	-0.114525	-0.0253309	-0.0600384			7.1	0.191972	0.384007	0.502755	-0.121304	-0.120832	0.135214	0.437506			7.1	5.31723	0.228207	0.301359	-0.100184	-0.0048453	0.0987006	0.277481			7.1	-0.335584	0.19909	0.119919	-0.10029	-0.333732	0.167961	-0.164658
7.13333	-0.511448	0.386181	0.890466	-0.292438	-0.117053	-0.163017	-0.444109			7.13333	0.0093505	0.660407	0.394854	0.0137266	-0.243519	0.167479	0.108974			7.13333	5.45178	-0.113413	0.295314	-0.267572	-0.143854	-0.0793224	0.310661			7.13333	-0.432745	0.174655	0.156217	-0.160303	-0.234939	0.0328092	-0.258066
7.16667	-0.416598	-0.150432	2.41066	-0.0270722	-0.173696	-0.193211	0.0511399			7.16667	-0.188671	0.676554	0.0464297	-0.129271	-0.301991	0.184208	0.252112			7.16667	4.73829	0.325813	0.464093	-0.130866	-0.121241	-0.00457216	0.28729			7.16667	-0.351874	0.0536403	0.0323196	-0.148687	-0.251404	-0.0419957	-0.24887
7.2	-0.377756	0.166291	1.97322	-0.54315	-0.266692	-0.257222	-0.29924			7.2	-0.01667	0.36645	0.244121	-0.0679292	-0.275887	0.0862211	0.406073			7.2	4.90737	0.203806	0.111852	0.176142	-0.0187536	0.289268	0.10072			7.2	-0.369329	0.13742	0.31109	-0.242578	-0.281395	0.371002	-0.142396
7.23333	-0.0696385	0.699853	1.12608	-0.175433	-0.426119	-0.0990048	-0.198169			7.23333	0.109172	0.262835	0.209766	-0.128076	-0.171473	-0.177866	0.483575			7.23333	5.11845	0.37665	0.168845	-0.0263559	0.0148305	0.227793	0.271253			7.23333	-0.0947188	0.225271	0.126211	-0.352441	-0.354314	0.24968	-0.120617
7.26667	0.0372801	-0.256968	0.730906	-0.547216	-0.430702	-0.0422397	0.0477708			7.26667	0.184415	0.186573	0.343893	-0.124092	-0.319219	-0.0954132	-0.00186872			7.26667	1.06386	0.369533	0.500777	-0.197596	0.171334	0.59381	0.49317			7.26667	-0.184607	0.278215	0.173156	-0.196117	-0.24376	0.26791	-0.25855
7.3	-0.137408	0.346293	0.548315	-0.372143	-0.283488	-0.214951	0.199377			7.3	0.303417	0.653092	0.157736	-0.161534	-0.262313	-0.035665	0.209387			7.3	1.82267	0.262776	0.163071	0.0588066	-0.171077	0.171146	0.28064			7.3	-0.171516	0.187454	0.0405472	-0.122552	-0.292568	0.250309	-0.0814147
7.33333	-0.384607	-0.0829304	0.845344	-0.154779	-0.305254	-0.0434475	-0.268919			7.33333	-0.182078	0.386724	0.315397	-0.152373	-0.361507	-0.0213255	0.142869			7.33333	4.13651	0.454938	0.15768	-0.0612552	-0.0893051	0.236005	0.131846			7.33333	-0.0932643	0.0728397	0.154281	-0.276457	-0.11968	0.321342	-0.157399
7.36667	-0.200479	-0.0509021	0.725688	-0.347047	-0.187269	-0.240314	-0.177955			7.36667	0.13568	0.659422	0.346628	-0.0535895	-0.0754121	-0.149186	0.220508			7.36667	4.8281	0.253626	0.417829	-0.0331682	0.0585328	0.0785368	0.263952			7.36667	-0.176462	0.226435	0.207035	-0.160787	-0.0779279	0.384203	-0.108033
7.4	1.20185	0.0441416	1.07455	-0.239988	-0.0069309	-0.438388	0.0814612			7.4	0.115449	0.462479	1.23901	-0.277048	-0.284241	0.057542	0.112542			7.4	4.52689	0.298362	0.244041	-0.240884	0.109968	0.468379	0.167332			7.4	-0.161917	0.16011	0.238977	-0.106097	-0.126737	0.479752	-0.280813
7.43333	-0.114779	0.131893	0.359286	-0.0646081	-0.1497	0.151003	-0.275657			7.43333	-0.0485107	0.26127	1.34523	-0.109354	-0.161554	-0.223274	0.187135			7.43333	4.56844	0.158053	0.253018	-0.0126699	-0.153354	0.33006	0.0998931			7.43333	-0.365547	0.0972753	0.166865	-0.180146	-0.00912527	0.150988	-0.231931
7.46667	0.0645083	-0.134928	0.693887	-0.0738981	0.14423	-0.165432	0.212854			7.46667	-0.282171	0.466989	1.30972	-0.029292	-0.303035	0.088611	0.20966			7.46667	4.50903	0.307512	0.270058	-0.0564451	-0.157423	0.315613	-0.147162			7.46667	-0.237551	0.174655	0.142182	-0.0702832	-0.117328	0.268539	-0.0770588
7.5	-0.520249	-0.000344973	1.14447	-0.277542	-0.346217	-0.25843	0.273496			7.5	-0.289209	0.393255	2.41778	-0.333609	-0.208018	-0.229249	0.319774			7.5	5.27433	0.398001	0.391182	0.0466425	-0.103534	0.0763849	0.104987			7.5	-0.332675	0.331741	0.0899127	-0.0635075	-0.167901	0.269796	-0.129812
7.53333	0.0593474	-0.100521	0.503911	-0.292603	-0.422331	-0.324858	-0.0431932			7.53333	0.0129912	0.586489	2.37717	-0.13405	-0.184003	0.057542	0.050129			7.53333	5.41393	0.330897	0.302502	-0.126278	0.0307253	0.137948	0.40878			7.53333	-0.43449	0.0751669	-0.0562479	-0.0814147	-0.273163	0.247794	-0.177242
7.56667	0.752489	0.390867	0.0259023	-0.367311	-0.455773	-0.0688106	0.0814612			7.56667	0.100958	0.671835	1.68235	-0.204553	0.0237814	0.233202	0.380888			7.56667	4.90716	0.271927	0.342369	-0.206938	-0.136942	0.0678951	0.301976			7.56667	-0.345184	0.0664399	0.153313	-0.330662	-0.343729	-0.233094	-0.0204337
7.6	-0.402716	0.095977	0.487248	-0.201287	-0.291047	-0.156978	0.280234			7.6	0.141653	0.611633	1.7993	0.00934516	-0.0701914	-0.114533	-0.152			7.6	5.32416	0.368516	0.335836	0.0126012	-0.0711227	0.0623148	0.232852			7.6	-0.375728	-0.0458476	0.0758774	-0.0635075	-0.147318	0.227679	-0.0993217
7.63333	-0.744562	-0.311386	0.0380226	-0.248279	-0.340808	0.111147	0.172425			7.63333	-0.131648	0.805206	1.48936	-0.106566	-0.214283	-0.0834636	0.0987117			7.63333	5.00363	0.235324	0.23101	0.0133397	-0.154235	-0.173893	0.0607953			7.63333	-0.208461	0.208981	0.159121	-0.173854	-0.0743996	0.145331	-0.157399
7.66667	-0.547651	-0.0256973	0.0844514	-0.138247	-0.508336	-0.0494863	0.482377			7.66667	-0.0445958	0.495478	1.35348	-0.232037	-0.205408	-0.0225205	0.350586			7.66667	7.0724	0.0319789	0.361127	-0.0436273	0.0228312	0.375673	0.504804			7.66667	-0.344311	0.0693488	0.159605	-0.108517	-0.280807	0.423177	-0.263873
7.7	-0.16764	0.0158699	0.161966	-0.204602	-0.439857	-0.228236	0.344246			7.7	0.11875	0.423826	1.28734	-0.0926251	-0.279542	-0.119312	-0.0193774			7.7	5.78435	0.32073	0.451202	-0.0809269	-0.0718437	0.133339	0.363565			7.7	-0.219515	-0.0516655	-0.0688312	-0.215476	-0.172605	0.205049	-0.0180139
7.73333	-0.649982	-0.0153755	0.204861	-0.427711	-0.216661	-0.328481	-0.457585			7.73333	-0.32423	0.888084	0.766444	-0.277446	-0.468532	-0.00937593	0.259281			7.73333	4.72592	0.0533301	0.119899	0.0714098	-0.0074122	-0.145696	0.0445113			7.73333	-0.310858	-0.0150122	0.0342556	-0.144815	-0.224942	0.121443	-0.204828
7.76667	-0.143913	-0.165043	0.713559	-0.463522	-0.234245	-0.362298	-0.12405			7.76667	-0.188497	0.613529	0.721061	-0.144008	-0.00649869	0.0384226	0.23792			7.76667	3.94891	0.140769	0.349097	-0.261559	0.0329502	0.127701	0.168455			7.76667	-0.299803	0.197927	0.114596	-0.197085	-0.104979	0.0918987	-0.216928
7.8	-0.186073	-0.0883778	0.562718	-0.363518	-0.386303	-0.0965893	0.148842			7.8	-0.125936	0.541717	0.842368	-0.101388	-0.0440878	-0.196985	0.503915			7.8	4.95822	0.115351	0.484146	0.0691228	-0.0994268	-0.0536737	0.0939601			7.8	-0.333548	0.185127	0.230266	-0.0102702	-0.0344117	0.0837267	-0.265809
7.83333	-0.11187	-0.176785	0.158394	-0.444032	-0.578625	-0.304325	-0.157741			7.83333	0.181938	0.425044	1.52486	-0.204952	-0.115089	-0.0679291	0.606031			7.83333	4.66348	0.15602	0.51735	-0.171521	-0.235649	-0.0246594	0.339859			7.83333	-0.354783	0.0530584	-0.0214017	-0.349053	-0.0467609	-0.0482818	0.157669
7.86667	-0.0961966	0.0202765	0.493239	-0.56398	-0.207495	-0.251184	-0.225121			7.86667	0.189844	0.462926	1.30342	-0.170298	-0.194966	-0.0165457	0.760521			7.86667	4.97205	0.230241	0.160663	-0.247957	-0.115082	-0.29056	0.328644			7.86667	-0.27944	-0.0673742	0.121855	-0.17579	-0.295509	0.0271516	-0.0204337
7.9	-0.172562	-0.146879	0.77855	-0.276749	-0.197141	-0.0953815	0.222961			7.9	0.105055	0.532497	1.74592	-0.108956	-0.0195505	-0.146797	0.30476			7.9	4.02316	0.344114	0.187979	-0.0628103	-0.0419499	-0.236619	-0.000530027			7.9	-0.288458	0.343959	0.0623261	-0.118197	-0.208476	0.132758	-0.177242
7.93333	-0.510507	-0.317899	0.756709	-0.198314	-0.693343	-0.130407	0.313925			7.93333	-0.00920639	0.232314	1.40725	-0.127677	-0.133362	0.0563471	0.347911			7.93333	3.19397	0.274977	0.506207	-0.240799	-0.184598	-0.0893905	0.131216			7.93333	-0.26955	0.0210594	0.0115087	-0.291944	-0.0397043	-0.0419957	-0.187405
7.96667	-0.834029	0.218712	0.0861061	-0.202368	-0.525925	-0.387661	0.0848302			7.96667	-0.106163	0.396518	1.04588	0.134418	-0.326528	0.0324478	0.33036			7.96667	5.73433	0.265826	0.280829	-0.00384184	-0.0191827	0.223389	0.371814			7.96667	-0.27275	-0.0493384	0.18816	-0.370348	-0.233763	-0.0394811	-0.269197
8	0.199502	-0.0513281	-0.28105	-0.464266	-0.633989	-0.200457	0.303818			8	0.0573562	0.319765	1.35128	-0.324448	-0.249262	-0.136042	0.378595			8	6.21391	0.194655	0.217828	-0.0829142	-0.180299	-0.102439	0.156361			8	-0.241333	-0.0016308	-0.033985	0.17606	-0.229058	0.275453	-0.125456
8.03333	-0.394074	0.164535	0.258707	-0.155697	-0.423127	0.124432	-0.356514			8.03333	-0.196032	0.446312	1.14584	-0.116524	-0.209062	-0.168306	0.209114			8.03333	6.35866	0.292261	0.394062	-0.0320962	-0.117414	0.165206	0.495549			8.03333	-0.197697	0.0443314	0.212842	-0.236287	-0.2861	-0.0168512	-0.142879
8.06667	0.776413	0.196262	0.0266079	-0.532768	-0.461102	-0.030162	0.303818			8.06667	-0.244383	0.450127	0.841204	-0.175874	-0.106214	0.118485	0.173105			8.06667	4.77764	0.0868823	0.44827	-0.142628	-0.0132428	0.282107	0.218449			8.06667	-0.357693	0.104839	0.136374	-0.154495	-0.109683	0.13213	-0.265809
8.1	-0.165847	0.106196	-0.087363	-0.266255	-0.375636	-0.46979	0.0342946			8.1	-0.0655856	0.638915	0.88528	-0.204952	-0.293638	0.089806	0.448706			8.1	3.36533	0.0675644	0.44466	0.0456629	-0.12764	0.305879	0.494255			8.1	-0.338202	0.150219	0.0908807	-0.219348	-0.344317	0.251566	-0.141428
8.13333	-0.388796	0.163103	-0.334976	-0.503878	0.0172975	-0.277755	-0.585608			8.13333	0.0206675	0.208706	0.79406	-0.173086	-0.149024	0.144774	0.32158			8.13333	4.87074	0.251592	0.535738	-0.129355	-0.00922093	-0.0093895	0.382476			8.13333	-0.217479	-0.0324662	0.111208	-0.0775428	-0.196127	0.00640743	-0.129328
8.16667	0.130566	0.500423	0.808841	-0.551115	-0.373401	-0.207704	-0.413787			8.16667	0.231705	0.0660274	0.632997	-0.128872	-0.07489	0.139994	0.102			8.16667	4.4933	-0.107313	0.318213	0.0301964	-0.155539	0.0619747	0.160952			8.16667	-0.318712	0.0297864	0.210423	-0.0848025	-0.176721	0.248423	-0.199989
8.2	-0.344025	0.195605	0.465614	-0.330852	-0.577379	-0.109875	0.22633			8.2	0.306499	0.499773	0.996695	-0.180256	-0.0999495	0.100561	0.369016			8.2	4.52184	0.234308	0.298428	0.0670253	-0.0173689	-0.129403	0.368773			8.2	-0.339075	0.250289	0.122823	-0.300656	-0.300801	-0.0891415	0.0018292
8.23333	-0.267801	-0.0383742	0.284798	-0.571236	-0.197007	-0.158186	-0.413787			8.23333	0.042143	0.331682	0.960842	-0.194595	-0.0138077	0.0790514	0.515127			8.23333	4.673	-0.0574931	0.504758	-0.0901021	-0.182469	-0.240626	0.428487			8.23333	-0.303003	0.414357	0.14073	-0.156431	-0.0126537	0.144073	-0.158367
8.26667	-0.196667	0.0498222	0.368243	-0.554542	-0.181721	-0.182341	0.111783			8.26667	-0.00760762	0.455973	0.852394	-0.135245	0.000288206	0.0659067	0.593397			8.26667	4.02723	0.160087	0.205876	-0.144591	-0.258601	-0.0685911	0.319392			8.26667	-0.391728	-0.00221255	0.105884	-0.142396	-0.182014	0.316942	-0.167078
8.3	-0.586136	0.0715951	0.0360527	0.0297963	-0.379973	-0.165432	0.0342946			8.3	0.315619	0.439127	0.964703	-0.0818703	-0.293638	0.108925	0.532311			8.3	4.23386	0.0685811	0.193784	0.0182606	-0.0833249	-0.00678159	0.445226			8.3	-0.341693	0.243307	0.14799	-0.294364	-0.111447	0.0742976	0.113144
8.33333	-0.641067	-0.0575089	0.168465	-0.336692	-0.585646	0.0072788	-0.0735146			8.33333	0.209199	0.203678	0.423828	0.00854844	-0.0607941	0.179428	0.211618			8.33333	4.12766	0.304462	0.303439	-0.255542	-0.0935343	-0.0207749	0.174054			8.33333	-0.333257	-0.099955	-0.0717351	-0.122552	-0.194363	0.144702	-0.191277
8.36667	-0.318878	-0.0728594	0.272226	-0.621284	-0.49725	-0.257222	0.357722			8.36667	-0.05413	0.463946	0.646091	-0.183044	-0.0921184	0.137604	0.591497			8.36667	5.21597	0.0299455	0.605679	-0.0822726	-0.049122	0.226282	0.322628			8.36667	-0.231733	0.175818	0.264628	-0.131748	-0.111447	0.379174	-0.0562479
8.4	-0.542851	-0.0680023	-0.0692345	-0.375088	-0.298949	-0.493945	-0.117312			8.4	0.0228281	0.0924707	0.733309	-0.168704	-0.185047	-0.0535895	0.33621			8.4	5.51676	-0.0646103	0.352246	0.0605415	-0.185442	0.0692309	0.555737			8.4	-0.203515	0.0338591	0.395301	-0.133684	-0.150259	0.205677	-0.145783
8.43333	-0.655735	-0.157012	0.199594	-0.300689	-0.336275	0.204145	-0.198169			8.43333	0.0846406	0.450398	0.696004	-0.333211	0.112533	0.0384226	0.233637			8.43333	4.17379	0.271927	0.0593216	-0.13219	-0.106694	-0.213304	0.0419781			8.43333	-0.361765	0.139747	0.0284478	-0.184501	-0.0579339	0.0504103	-0.121585
8.46667	-0.319417	-0.38094	0.446879	-0.254791	-0.510421	3.21714e-05	0.169056			8.46667	-0.390963	0.761429	0.47243	-0.100193	-0.143281	0.247541	0.121129			8.46667	3.36463	0.163137	0.233628	-0.108302	-0.0172594	0.0132086	0.138106			8.46667	-0.325984	-0.0720286	0.230266	-0.0722191	-0.214357	0.00703612	-0.214992
8.5	-0.569258	-0.0937824	0.227659	-0.216513	-0.546823	-0.303118	0.0208185			8.5	-0.112588	0.440027	0.539253	-0.246377	-0.139627	-0.0607593	0.213013			8.5	3.58524	0.325813	0.158285	0.00913482	-0.0300471	0.201914	0.187232			8.5	-0.467071	-0.000467107	-0.00446255	-0.25613	-0.0555817	0.103842	-0.120133
8.53333	-0.425969	-0.00712313	0.199438	-0.473554	-0.0885711	-0.0120455	-0.238597			8.53333	0.0496319	0.542214	0.820557	-0.107761	0.0780768	-0.038055	0.136728			8.53333	4.34998	0.0970495	0.216536	-0.156941	-0.088481	0.136994	0.0783408			8.53333	-0.256459	-0.0365387	-0.0862544	-0.113357	-0.295509	-0.0256517	-0.24403
8.56667	0.206915	0.0278553	0.781961	-0.415687	-0.211255	-0.398531	0.162318			8.56667	0.176014	0.413885	0.377594	-0.169103	-0.0665368	-0.139627	0.59892			8.56667	3.47235	0.177371	0.00308599	0.203334	-0.231783	-0.150982	0.0489043			8.56667	-0.282931	0.123456	0.0613582	-0.139492	-0.156139	0.0862411	-0.00155862
8.6	-0.0190056	0.154301	0.0746113	-0.22011	-0.223118	-0.391285	-0.231859			8.6	-0.0485891	0.420106	0.504034	0.014125	-0.13023	0.0312528	0.371995			8.6	3.04771	0.32988	0.145671	-0.1765	-0.211511	-0.0745903	0.221971			8.6	-0.356529	-0.0953006	-0.00881828	-0.207248	-0.202596	0.118929	-0.118681
8.63333	-0.710139	-0.329666	0.270638	-0.443247	-0.631821	0.00486326	-0.343038			8.63333	0.0134691	0.426923	0.433707	-0.208536	-0.192356	-0.114533	0.396197			8.63333	3.49422	0.0523134	0.27075	-0.157378	-0.211323	0.0224996	0.29482			8.63333	-0.329766	-0.044684	0.101528	-0.00301053	-0.413708	-0.136287	-0.167078
8.66667	-0.487005	0.343311	0.10701	-0.429845	-0.636429	-0.0482786	-0.198169			8.66667	-0.113786	0.463902	0.389883	-0.030487	-0.205408	-0.0213255	0.418283			8.66667	4.91833	0.145852	0.494292	-0.00296826	-0.0859123	-0.0631946	0.0681924			8.66667	-0.210497	0.117638	0.0289318	-0.161754	-0.0961576	-0.157032	-0.175306
8.7	-0.3273	-0.048252	0.416279	-0.424567	-0.255167	-0.0217076	0.158949			8.7	-0.178705	0.354779	0.516067	-0.208935	-0.0874197	0.00615859	0.21748			8.7	3.72402	0.142802	0.574391	-0.157894	-0.261893	-0.260122	0.172394			8.7	-0.204679	0.00535086	-0.0509241	-0.0480203	-0.287276	-0.0570823	-0.174822
8.73333	-0.320817	0.00959722	-0.535771	-0.486588	-0.543055	-0.160601	-0.117312			8.73333	-0.0696944	0.356326	0.533942	0.0483806	0.057194	-0.170696	0.0733033			8.73333	2.45398	0.517975	0.291387	-0.118652	-0.130327	0.177615	0.137482			8.73333	-0.337911	-0.00977596	0.118467	-0.151591	-0.126148	-0.0991993	-0.0383408
8.76667	-0.577497	0.0388529	-0.2274	-0.6127	-0.344827	-0.223405	-0.0398242			8.76667	-0.155017	0.526289	0.341073	-0.178264	-0.235688	-0.0273003	0.326178			8.76667	3.32525	0.219057	0.0851293	0.219266	-0.160869	0.0815723	0.0596018			8.76667	-0.292531	0.0443314	0.199291	-0.0267254	-0.2467	-0.0665115	-0.053828
8.8	-0.527065	0.0133331	0.248463	-0.0632713	-0.676677	-0.1449	-0.184693			8.8	-0.266564	0.539475	0.441735	-0.0989981	-0.105692	0.00615859	0.410537			8.8	3.01614	0.205839	0.477531	-0.259709	-0.0256152	0.243665	0.40417			8.8	-0.268968	0.0390953	0.315445	-0.241611	-0.172605	0.186191	0.00570093
8.83333	-0.200228	-0.207316	-0.113109	-0.0348424	-0.30925	-0.175094	0.236437			8.83333	-0.132978	0.456367	0.594065	-0.0468181	-0.27902	0.0515672	0.261704			8.83333	0.520563	0.537293	0.191337	-0.0228421	0.00354173	0.714267	-0.0115841			8.83333	-0.336748	0.0571311	0.0100568	-0.0978698	-0.12262	0.0824696	-0.332114
8.86667	-0.265755	-0.0991065	-0.126439	-0.397252	-0.716493	-0.422687	0.15558			8.86667	-0.211513	0.466378	0.494306	-0.0257071	-0.183481	-0.0296903	0.312189			8.86667	2.22496	0.220074	0.187943	0.0749557	-0.0268496	0.111692	0.203029			8.86667	-0.291076	-0.0656288	-0.0576998	-0.0915781	-0.190247	-0.0533107	-0.231447
8.9	0.162264	0.104237	0.297599	-0.0387956	-0.166681	-0.1449	0.0881993			8.9	-0.0488095	0.299011	0.640749	-0.14839	-0.234644	-0.0177407	0.234909			8.9	3.07243	0.21194	0.320612	0.107667	0.0533487	0.436521	0.412407			8.9	-0.352456	-0.035957	0.0119927	-0.200957	-0.167312	0.0302947	-0.28178
8.93333	-0.509124	-0.0370657	0.0231918	-0.262931	-0.235899	0.101485	-0.181324			8.93333	-0.217937	0.537778	0.247569	-0.202163	-0.20854	0.0432024	0.210556			8.93333	3.3126	0.083832	0.0466021	-0.0752732	0.0187545	0.510413	0.419845			8.93333	-0.371947	0.00244183	-0.257098	-0.0586678	-0.171429	-0.0401098	-0.254194
8.96667	-0.374634	0.369685	0.235231	-0.233583	-0.388342	-0.274131	-0.471061			8.96667	0.164536	0.476316	0.342615	-0.144008	-0.289461	-0.0237155	0.340539			8.96667	3.20237	0.348181	0.26672	0.136238	-0.0539047	0.111058	0.337989			8.96667	-0.317548	-0.0307208	0.0540985	-0.225639	-0.153199	-0.0690259	0.0734576
9	-0.38662	-0.246411	0.37763	-0.237019	-0.290325	-0.333312	-0.332931			9	-0.103508	0.504729	0.452306	-0.213316	-0.421023	-0.0488097	0.0823859			9	5.01584	0.0777316	0.201447	-0.0441876	0.0611088	-0.00105884	0.336481			9	-0.291367	0.0577129	0.00279711	-0.241611	-0.187894	-0.0394811	-0.276457
9.03333	0.0786613	-0.140325	-0.0170776	-0.750843	-0.245396	0.021772	-0.396942			9.03333	-0.00927326	0.579935	0.459239	-0.106168	-0.131274	0.123265	0.296285			9.03333	3.62744	0.166187	0.30456	-0.122279	-0.0527514	-0.156505	0.135622			9.03333	-0.270713	0.0292047	0.102012	-0.0998057	0.00734029	-0.143831	-0.101258
9.06667	-0.424562	0.114719	0.49155	-0.16475	-0.124617	0.0435119	0.108413			9.06667	-0.0655555	0.404043	0.280002	0.00735357	0.0180386	-0.00340104	0.396577			9.06667	3.52563	0.423419	0.0492094	0.0451937	-0.0914087	0.117236	0.316465			9.06667	-0.26315	0.154873	0.184772	-0.107549	-0.223766	-0.0225086	-0.0214017
9.1	-0.189074	-0.118	0.307472	-0.502255	-0.143151	-0.0748495	0.162318			9.1	-0.155001	0.49311	0.190265	-0.194595	-0.126575	-0.333211	0.228174			9.1	3.25747	0.480356	0.453796	0.015554	0.0300096	0.0375191	0.364418			9.1	-0.172971	0.103093	-0.074155	-0.259518	-0.217885	-0.00993639	-0.25129
9.13333	0.166896	0.0315049	0.295257	-0.262096	-0.0515061	-0.126783	-0.0869907			9.13333	-0.0780698	0.286342	0.310831	-0.151577	-0.119266	-0.0261054	0.150234			9.13333	3.90414	0.420369	0.0414432	-0.0934201	-0.178467	-0.103433	0.1778			9.13333	-0.291658	0.0338591	0.208971	-0.191277	-0.280807	0.232079	-0.211604
9.16667	-0.27782	0.306781	0.20153	-0.324012	0.277098	-0.306741	0.300449			9.16667	-0.11537	0.198352	0.345421	-0.134449	-0.278498	-0.0655391	0.344019			9.16667	2.317	-0.0330917	0.241252	-0.0321967	-0.321204	-0.0639852	0.0464999			9.16667	-0.178498	0.175236	0.235105	-0.226123	-0.126737	0.105099	-0.193697
9.2	-0.344276	0.369555	0.570951	-0.32952	-0.621142	-0.176302	-0.100467			9.2	-0.0388028	0.268099	0.166943	-0.13405	-0.0775004	-0.0320802	0.310087			9.2	3.21088	-0.107313	0.188032	-0.0838278	-0.1647	-0.170243	0.13212			9.2	-0.348965	0.160691	0.0521626	-0.224671	-0.347258	-0.0338237	-0.152075
9.23333	-0.756891	-0.183257	-0.306649	-0.586504	-0.328962	-0.184756	-0.00613381			9.23333	-0.167253	0.452292	0.199186	-0.320066	-0.179304	-0.0428348	0.16112			9.23333	2.92327	0.0441796	0.0753508	-0.0983428	-0.14021	-0.213467	0.59356			9.23333	-0.233478	0.19909	0.255916	-0.102709	-0.133793	0.34963	-0.430845
9.26667	-0.369462	-0.162586	0.159378	-0.417201	-0.486043	-0.175094	0.216223			9.26667	-0.0228861	0.330174	0.518698	-0.187425	-0.162076	0.0372276	0.187967			9.26667	1.93774	0.282094	0.372943	-0.238863	-0.189856	0.032506	0.310598			9.26667	-0.187225	0.208981	0.242365	-0.074155	-0.181426	0.375403	-0.152559
9.3	-0.144947	-0.0629277	0.459737	0.022704	-0.432937	-0.077265	-0.0634074			9.3	-0.119889	0.371711	0.40077	0.0619235	-0.0780224	-0.0942183	-0.085933			9.3	1.75069	0.05028	0.357793	-0.144018	-0.0896894	0.0885408	0.167515			9.3	-0.121482	0.0728397	0.30625	-0.0170458	-0.0673428	0.12773	-0.0915781
9.33333	-0.420409	0.179235	-0.501468	-0.0896475	-0.280976	-0.0325776	-0.0431932			9.33333	-0.260919	0.152617	0.264512	0.0686949	-0.168341	0.00974352	0.0979167			9.33333	2.14463	0.0228283	0.260656	-0.103018	-0.156444	0.0985002	0.146341			9.33333	-0.249187	-0.070865	-0.0436646	-0.124972	-0.0120656	0.286768	-0.231447
9.36667	-0.751131	0.153584	0.0992595	-0.197515	-0.317739	-0.158186	-0.204907			9.36667	0.0264024	0.331842	0.179622	-0.132855	-0.166252	-0.0249105	0.0977087			9.36667	1.94347	0.207873	0.202404	-0.0333125	-0.10104	0.0322075	0.388198			9.36667	-0.261114	0.0303683	0.0942685	-0.247902	-0.192011	0.201277	-0.188373
9.4	-0.436363	-0.238229	0.223845	-0.146921	-0.126198	0.00123997	0.0983063			9.4	-0.0620083	0.580009	0.153097	-0.251555	-0.108825	-0.03686	0.258003			9.4	1.25502	0.0543469	0.0725176	0.0614652	-0.351837	0.124092	0.0797066			9.4	-0.411218	0.139747	-0.0973858	-0.160787	-0.35549	-0.0105651	-0.123036
9.43333	0.420123	-0.311341	0.0832453	-0.478212	-0.21704	-0.204081	-0.029717			9.43333	-0.207791	0.397413	0.327765	-0.227656	-0.324962	0.157919	-0.00519007			9.43333	0.696954	0.387834	0.102627	0.0335271	-0.179453	-0.201011	0.0799716			9.43333	-0.232896	0.114147	0.191548	-0.143847	-0.0943935	0.247794	-0.110453
9.46667	-0.724956	-0.125109	0.0113209	-0.433952	-0.415915	-0.286209	-0.137526			9.46667	0.0279523	0.359838	0.311583	-0.249563	-0.201753	0.10773	0.293088			9.46667	1.6402	0.278027	0.0138628	-0.150758	-0.1129	-0.0629879	0.594891			9.46667	-0.374856	0.265997	0.0782973	-0.0451165	-0.103214	0.0623539	-0.238223
9.5	0.179092	0.0178884	0.329734	-0.147175	-0.0966736	-0.201665	-0.0937288			9.5	0.0357836	0.310048	0.39245	-0.151577	-0.0545292	-0.0918283	0.259373			9.5	1.91288	0.148903	0.272642	-0.116909	-0.10167	-0.257508	-0.0599454			9.5	-0.305331	0.193272	0.0705537	-0.265325	-0.266694	-0.0966849	-0.170466
9.53333	-0.411577	-0.214026	-0.0184713	-0.450758	-0.136224	-0.142484	0.249913			9.53333	-0.181538	0.658332	0.324848	0.0264729	-0.25396	0.153139	0.0759951			9.53333	2.24636	-0.0574931	0.328951	-0.13789	0.0693279	-0.280156	0.485742			9.53333	-0.372819	0.135674	0.130083	-0.211604	-0.106743	-0.221779	-0.107549
9.56667	-0.202989	-0.196532	0.142544	-0.310704	-0.56665	-0.0265387	-0.0802527			9.56667	-0.0341744	0.602561	0.361116	-0.210528	-0.241953	0.0790514	-0.0199922			9.56667	2.24548	0.193639	0.438349	-0.0189974	0.00850465	0.245645	0.459587			9.56667	-0.277404	0.197927	-0.0117221	-0.16611	-0.254345	0.0887557	-0.275973
9.6	-0.625972	-0.0181677	0.0901757	-0.371609	0.117751	-0.192003	0.404889			9.6	0.00716464	0.536056	0.403453	-0.18623	-0.398574	-0.128872	0.159537			9.6	0.662416	0.463072	0.400484	-0.0854437	-0.0179598	0.887236	0.191701			9.6	-0.18228	0.169418	0.359003	-0.255646	-0.390186	0.150988	-0.0635075
9.63333	-0.42964	0.00587211	0.0521405	-0.564165	-0.529439	-0.427518	-0.157741			9.63333	-0.00988978	0.149113	0.128516	-0.265496	-0.28163	0.0551521	0.187326			9.63333	0.317038	0.482389	0.287665	0.0360278	-0.151474	0.230697	0.126259			9.63333	-0.295149	0.0937845	0.319801	-0.290976	-0.242584	0.0189797	-0.252742
9.66667	-0.105617	0.0356848	0.212381	-0.466066	-0.562228	-0.298287	-0.258812			9.66667	-0.395173	0.171348	0.0839165	-0.255937	-0.300947	-0.262708	0.0906615			9.66667	0.654006	0.306495	0.274469	-0.116857	-0.171439	-0.0413046	0.412282			9.66667	-0.263732	0.0926209	0.167833	-0.0465684	-0.239055	0.129615	-0.0441484
9.7	-0.697661	-0.0439908	0.189661	-0.018432	-0.420078	-0.0204999	0.377937			9.7	-0.0680592	0.513928	0.286587	-0.204952	-0.177216	-0.0966081	0.136472			9.7	1.45869	0.272943	0.289741	0.0162791	-0.0572847	0.00353289	0.0993754			9.7	-0.285549	0.0262957	0.0874929	-0.126908	-0.420177	0.116415	-0.203376
9.73333	-0.280253	-0.119381	0.0455509	-0.543114	-0.359043	-0.0820961	0.0578779			9.73333	-0.223429	0.414947	0.160365	-0.069124	-0.279542	-0.110948	0.230683			9.73333	1.45214	0.179404	0.631328	-0.244805	-0.143896	-0.0912637	0.436833			9.73333	-0.335293	0.303814	0.324641	-0.297752	-0.160256	0.422548	-0.25129
9.76667	-0.844882	0.247044	-0.0176446	-0.226589	-0.454402	-0.178718	0.0309256			9.76667	-0.192884	0.332704	0.356308	-0.062751	-0.0728018	0.157919	0.0965491			9.76667	0.75796	0.238375	0.465198	-0.303059	-0.223511	0.354792	0.362624			9.76667	-0.271004	0.201417	-0.0615716	-0.212572	-0.120856	0.0981848	-0.153043
9.8	-0.624568	-0.176483	0.122181	-0.206416	-0.515766	-0.0651873	-0.0634074			9.8	-0.256266	0.41137	0.131245	-0.172687	-0.282674	-0.174281	0.0427182			9.8	1.35187	0.380717	0.567504	0.190648	-0.156531	0.029285	0.406014			9.8	-0.357111	-0.0720286	0.107336	-0.194181	-0.16496	0.0227514	-0.147235
9.83333	-0.863063	-0.298589	-0.140305	-0.460753	-0.355554	0.00969434	-0.0667765			9.83333	-0.499687	0.717609	0.192803	-0.158348	-0.237776	-0.0201305	-0.102161			9.83333	3.23149	0.180421	0.385851	-0.122878	-0.185835	0.127926	0.256093			9.83333	-0.376892	0.08913	-0.171434	-0.0833505	-0.216709	0.254709	-0.137072
9.86667	-0.716087	0.40771	0.19767	-0.349201	-0.391847	-0.163017	-0.238597			9.86667	0.0378358	0.337679	0.191657	-0.176671	-0.236732	0.211692	0.0717215			9.86667	4.62098	0.315646	0.466068	-0.0429957	-0.0229296	0.283046	0.218088			9.86667	-0.188679	0.356758	-0.0286612	-0.305495	-0.250228	0.114529	-0.205312
9.9	-0.740689	-0.0372041	0.0456407	-0.425034	-0.212545	-0.181133	0.15558			9.9	0.042537	0.533588	0.882686	-0.222876	0.0378773	0.0443974	0.194107			9.9	4.20626	0.0868823	0.296744	-0.166398	-0.110573	0.134347	0.25614			9.9	-0.410927	0.158364	0.0700697	-0.0828666	-0.215533	-0.102342	-0.0659274
9.93333	-0.784559	-0.116738	-0.396101	-0.348609	-0.452903	-0.228236	-0.198169			9.93333	0.0762423	0.501692	1.20971	-0.120109	-0.203319	-0.0762938	0.47089			9.93333	3.14885	0.220074	-0.0363656	0.162612	-0.0673211	0.303167	0.421252			9.93333	-0.380092	0.0466587	0.159605	-0.05286	-0.226118	-0.0124509	-0.0456004
9.96667	-0.436889	-0.291511	-0.109204	-0.40132	-0.426285	-0.363506	-0.0465622			9.96667	-0.142607	0.374109	1.311	-0.0229189	-0.0764563	0.0718816	0.250318			9.96667	3.48265	0.166187	0.390577	-0.124107	0.0366985	0.0245576	0.41198			9.96667	-0.216897	0.0239685	0.384654	-0.130296	-0.215533	-0.0545679	-0.113841
10	-0.490411	-0.183704	-0.011353	-0.244962	-0.346428	-0.114706	-0.248704			10	0.263026	0.443552	1.45005	-0.116923	-0.00493253	0.0300579	0.113834			10	2.70844	0.110267	0.0391455	0.276246	0.0272683	0.128299	0.294059			10	-0.371365	0.0524767	0.249625	-0.013658	-0.111447	0.126472	-0.17095
10.0333	-0.760581	-0.108504	-0.0924026	-0.12837	-0.445169	-0.21495	-0.585608			10.0333	-0.112224	0.417955	1.77071	0.0487789	-0.184003	-0.0500046	0.58322			10.0333	2.83274	0.216007	0.326118	-0.0707628	-0.0895378	-0.0310663	0.2224			10.0333	-0.265477	-0.0219937	0.10056	-0.073671	-0.176721	0.0925273	-0.345181
10.0667	-0.545181	0.312924	-0.130922	-0.472482	-0.175756	-0.306741	-0.026348			10.0667	0.406986	0.395215	1.59668	-0.200172	-0.0837652	-0.0822686	0.502671			10.0667	2.5522	0.21194	0.316358	-0.0375038	-0.0156047	0.0185784	0.629758			10.0667	-0.443508	-0.0027944	0.163477	-0.240643	-0.224354	0.0856126	-0.146267
10.1	-0.522607	-0.210901	-0.0521615	-0.481532	-0.25554	-0.1449	-0.110574			10.1	0.296666	0.428145	2.14347	-0.160738	0.0149062	-0.0774888	0.20047			10.1	2.60868	0.293278	0.525372	-0.136178	-0.220449	-0.244789	0.302342			10.1	-0.243951	0.218871	-0.0799626	-0.170466	-0.142026	0.115157	-0.422617
10.1333	-0.378796	-0.32507	-0.0674041	-0.667506	-0.114785	-0.0265387	-0.29924			10.1333	0.00183098	0.353326	1.88803	-0.138034	-0.0968171	0.248736	0.459883			10.1333	1.42687	0.430536	0.12606	0.0856185	-0.156633	-0.0475687	0.167852			10.1333	-0.25035	0.224108	0.0540985	-0.278393	0.035567	0.0309233	-0.236287
10.1667	0.0327444	0.393939	0.353813	-0.285527	-0.285378	-0.392493	-0.188062			10.1667	0.295747	1.0055	1.95901	-0.0444282	-0.19079	-0.0942183	0.28611			10.1667	2.1265	0.236341	0.386357	-0.31726	0.0593133	0.0475815	0.0222023			10.1667	-0.312603	0.0943663	0.171221	-0.0949659	-0.0826324	0.196877	-0.246934
10.2	-0.369497	0.41987	0.2237	-0.311947	-0.491067	-0.234275	-0.204907			10.2	0.188806	0.775763	1.91803	-0.0468181	-0.308778	-0.18623	0.319169			10.2	1.58937	0.133652	0.469087	-0.0707058	0.120703	0.126543	0.405303			10.2	-0.24046	0.0431678	0.342548	-0.200473	-0.126148	0.182419	-0.124488
10.2333	-0.504951	-0.215448	0.167675	-0.3781	-0.478776	-0.1449	-0.396942			10.2333	0.110366	0.192406	1.45074	-0.136042	-0.0801107	0.0682967	0.00302134			10.2333	1.41813	-0.0463091	0.224063	0.0800943	-0.135877	-0.128772	0.309341			10.2333	-0.0699923	0.320687	0.208487	0.00570093	-0.0667548	0.149731	-0.146267
10.2667	-0.501126	0.166754	0.641151	-0.534024	-0.59819	-0.43718	0.172425			10.2667	-0.384844	0.652859	1.09241	-0.202163	0.170483	-0.104973	0.199398			10.2667	1.39981	0.474256	0.579183	0.0725608	-0.0944694	-0.0666342	0.130566			10.2667	-0.314348	0.106002	0.158637	-0.0881903	-0.0891009	0.279854	-0.229511
10.3	0.0283861	-0.0186138	0.744169	-0.295754	-0.48376	-0.297079	-0.245336			10.3	0.218938	0.327058	1.66269	-0.133652	-0.0195505	0.0694916	0.258852			10.3	1.52914	0.219057	0.293441	-0.040858	0.0641954	0.3145	0.187816			10.3	-0.378055	0.481845	0.285923	-0.183533	-0.143202	0.119558	0.0768454
10.3333	-0.53725	0.0348413	0.0996065	-0.683341	-0.500107	-0.178718	-0.0869907			10.3333	0.268169	0.587325	1.38024	0.130833	-0.0780224	-0.0786838	0.366792			10.3333	0.42982	0.407152	0.684783	0.0305247	0.0512678	0.296511	0.258935			10.3333	-0.206134	0.103675	0.254948	-0.236287	-0.120268	0.149102	-0.132232
10.3667	0.00609181	0.658397	0.216302	-0.429536	-0.463553	-0.227028	-0.134157			10.3667	0.252635	0.40703	1.14489	-0.189019	-0.0978612	0.0467873	0.265063			10.3667	0.647001	0.369533	0.453026	0.0938035	-0.0489323	0.424808	0.255461			10.3667	-0.233769	0.165346	0.169285	-0.305495	-0.147907	0.307513	-0.202892
10.4	-0.780281	0.623282	0.0244381	-0.0613479	-0.518189	-0.119537	-0.0735146			10.4	-0.20779	0.792826	0.705187	-0.168704	-0.127097	-0.171891	0.51642			10.4	-0.0538342	0.0380793	0.168496	-0.0999053	0.0009892	0.229588	0.29363			10.4	-0.31493	0.180473	0.427728	-0.285652	-0.109095	-0.00742197	-0.092546
10.4333	-0.287187	0.0401381	0.214583	-0.671166	-0.465292	-0.252391	0.546388			10.4333	-0.046772	0.350926	0.558761	-0.0985998	-0.127619	0.12924	0.242845			10.4333	0.312445	0.357332	0.632915	0.0160981	0.192026	0.18916	0.403935			10.4333	-0.245114	0.0588765	0.257368	-0.0576998	-0.210241	0.239622	-0.128844
10.4667	-0.212366	0.106563	0.410439	-0.545237	-0.347569	-0.32365	0.206116			10.4667	0.311385	0.503138	0.742773	-0.171493	-0.0247713	-0.0978031	0.284496			10.4667	0.236308	0.0584139	0.559756	-0.159208	0.110099	0.199404	-0.0346851			10.4667	-0.205843	0.312541	0.197355	-0.118197	-0.327852	0.270424	-0.17579
10.5	-0.0679597	-0.20016	-0.18509	-0.10059	-0.716051	-0.0555252	0.249913			10.5	-0.140971	0.401763	0.656177	-0.050403	-0.119788	0.0145233	0.32533			10.5	0.829796	0.0207949	0.362701	-0.297147	-0.352209	0.0676977	0.273143			10.5	-0.310276	0.292178	0.141214	-0.0576998	-0.133205	0.227679	-0.313239
10.5333	-0.678758	-0.116941	0.152129	-0.617672	-0.368128	-0.222197	-0.339669			10.5333	-0.240421	0.240344	0.653877	-0.0221222	-0.228901	-0.21252	0.25313			10.5333	1.22428	-0.16425	0.534254	-0.137356	-0.063948	0.474584	0.551598			10.5333	-0.194498	0.304396	0.200259	-0.258066	-0.16202	0.237737	-0.243062
10.5667	-0.474813	0.362964	0.0843564	-0.191733	-0.500065	-0.268092	0.0174495			10.5667	-0.156663	0.267488	0.537416	-0.0464198	-0.365162	0.0336428	0.0548576			10.5667	0.649042	0.170254	0.198669	0.0719146	-0.189225	0.268539	0.228147			10.5667	-0.319003	0.00884165	-0.00785037	-0.210636	-0.24376	0.00326443	-0.0973858
10.6	-0.231147	-0.174157	-0.123152	-0.0406588	-0.380303	-0.0229154	0.246544			10.6	-0.147911	0.336316	0.591127	-0.269479	-0.129708	-0.00459602	0.229608			10.6	0.576544	0.278027	0.397722	-0.120133	-0.133295	0.474671	0.51547			10.6	-0.315803	0.0693488	0.133954	-0.124488	-0.149083	0.0265231	-0.167078
10.6333	-0.611893	0.200458	-0.187783	-0.435731	-0.530324	-0.0120455	-0.00613381			10.6333	0.317647	0.527955	0.603814	-0.122499	-0.170951	0.257101	-0.00233324			10.6333	0.762919	0.268877	0.254705	-0.181592	-0.185912	0.00469906	0.133756			10.6333	-0.465907	-0.123809	0.0874929	-0.271133	-0.168489	0.0925273	-0.131264
10.6667	-0.588067	0.137751	-0.250688	-0.434554	-0.473795	-0.31278	-0.211645			10.6667	0.129873	0.452982	0.71642	-0.0683274	-0.125531	-0.144407	0.165545			10.6667	1.36417	0.184488	0.269059	0.101028	-0.12033	-0.148608	0.0286212			10.6667	-0.219515	0.136838	0.0463549	-0.184501	-0.123796	0.133387	-0.222251
10.7	-0.677903	-0.44199	-0.156698	-0.248133	-0.436539	-0.0108377	-0.01961			10.7	-0.0870421	0.679601	0.605186	-0.019334	-0.113523	-0.180256	0.357961			10.7	1.65186	0.0807818	0.164769	0.108565	-0.150707	0.456919	0.582224			10.7	-0.346347	0.168255	-0.0964179	-0.149171	-0.206712	0.298712	-0.033985
10.7333	-0.61762	-0.204582	-0.301565	-0.488136	-0.382388	0.101485	0.394782			10.7333	-0.00320432	0.50509	0.476288	-0.0731073	-0.402229	-0.0679291	0.281346			10.7333	1.65121	0.137719	0.402141	-0.0339562	-0.149807	0.203641	0.498335			10.7333	-0.362347	-0.0382842	0.0332875	0.0715217	-0.0108895	-0.00805055	0.06523
10.7667	-0.762846	-0.0571682	0.0802004	-0.419966	-0.535464	-0.182341	-0.235228			10.7667	0.0686329	0.704855	0.717948	-0.161136	-0.12031	0.0802463	0.310056			10.7667	3.22858	0.105183	0.199179	-0.0505195	-0.285526	0.0254232	0.105685			10.7667	-0.349547	0.0326955	-0.115777	-0.181114	-0.047937	0.221393	-0.25855
10.8	-0.34733	0.291642	-0.452002	-0.273685	-0.350179	-0.10142	0.253282			10.8	0.22778	0.460246	0.450343	-0.228054	-0.0989053	-0.179061	0.228888			10.8	3.52895	0.561694	0.362811	-0.188331	-0.22448	-0.242831	0.185053			10.8	-0.371656	0.111239	-0.145299	-0.219348	-0.240231	0.00326443	-0.263873
10.8333	-0.406093	-0.0444898	0.353725	-0.21482	-0.18456	-0.217366	-0.396942			10.8333	-0.196493	0.532607	0.442648	-0.209731	-0.16312	-0.0416399	0.0124435			10.8333	4.94833	0.248542	0.0565242	-0.15407	0.0825106	0.0727378	0.21522			10.8333	-0.38591	0.126365	0.253012	-0.216444	-0.106743	0.0918987	-0.0310811
10.8667	-0.66424	0.200647	-0.150305	-0.57494	-0.518473	-0.160601	-0.191431			10.8667	-0.00748546	0.145088	0.294066	-0.0770905	-0.339058	0.0587369	0.0917388			10.8667	4.46328	0.210923	0.605206	-0.13817	0.093058	0.0751385	0.508066			10.8667	-0.404818	0.169418	0.0303837	-0.236287	-0.170253	-0.0231373	-0.254194
10.9	-0.139683	-0.441634	0.119233	-0.377375	-0.394295	-0.167848	-0.164479			10.9	-0.156628	0.451296	0.44334	-0.179459	-0.237254	0.230812	-0.0214455			10.9	5.17899	0.324797	0.418087	-0.101584	-0.173298	-0.00117811	0.279191			10.9	-0.4118	-0.00977596	-0.0383408	-0.17579	-0.135557	0.0780692	-0.0209177
10.9333	-0.600933	-0.207272	-0.0111713	-0.334356	-0.044074	-0.0808883	-0.174586			10.9333	0.0981295	0.664329	0.444219	-0.196587	-0.215849	-0.0954133	0.234436			10.9333	3.55421	0.256676	0.100909	-0.158823	-0.0903329	-0.0267611	0.304888			10.9333	-0.36671	0.161273	0.223974	-0.0223696	-0.322559	-0.120572	-0.187405
10.9667	-0.478683	-0.035076	0.52675	-0.476199	-0.387281	-0.270508	-0.514858			10.9667	0.0795735	0.499832	0.413136	-0.343965	-0.149024	0.0109385	0.21466			10.9667	3.50781	0.298362	0.564736	0.1268	-0.0638335	0.353212	0.0887933			10.9667	-0.249769	-0.0598108	-0.132716	-0.143847	-0.172605	0.162932	-0.109001
11	-0.600493	0.0376708	-0.121129	-0.110814	-0.390372	-0.16664	-0.113943			11	-0.136021	0.717647	0.409766	-0.159543	-0.0414775	0.0587369	0.047068			11	3.63466	0.293278	0.334514	-0.0793709	-0.0854048	0.0194654	0.474759			11	-0.248314	0.171746	0.0826531	-0.201925	-0.424881	0.0466387	-0.241126
11.0333	-0.870736	0.300188	-0.00537611	-0.566048	-0.241642	-0.365922	-0.29924			11.0333	-0.122455	0.493318	0.67023	-0.121304	-0.0607941	-0.0141557	0.148587			11.0333	4.18943	0.148903	0.190068	0.180143	-0.181676	-0.0379208	0.0637901			11.0333	-0.277695	0.16651	0.17606	-0.28904	-0.43135	0.0604681	0.0860409
11.0667	0.0205008	0.153214	-0.0974737	-0.386078	-0.503402	-0.227028	-0.551918			11.0667	-0.0991228	0.44476	0.408279	-0.0886418	-0.196533	-0.192205	0.176176			11.0667	2.59452	0.155003	0.33351	0.116734	-0.177095	0.0932532	-0.057472			11.0667	-0.309694	0.0518948	0.193484	-0.00591446	-0.257285	0.185562	-0.125456
11.1	-0.583808	0.107235	0.233706	-0.548172	-0.186709	-0.219782	0.0545089			11.1	-0.177285	0.294762	0.511008	-0.187824	-0.235688	-0.168306	0.304988			11.1	3.81318	0.26786	0.313093	0.0944751	0.0661874	0.244005	0.559068			11.1	-0.32133	0.243889	0.15041	-0.220316	-0.203772	0.258481	-0.0712512
11.1333	-0.550317	-0.157808	0.128707	-0.582614	-0.185973	-0.32365	-0.0364552			11.1333	-0.110609	0.539602	0.302756	-0.174281	-0.168863	-0.0631493	0.144194			11.1333	0.584274	0.730471	0.436713	0.200335	0.278266	0.263495	0.454936			11.1333	-0.273332	0.0082598	0.0995923	-0.221768	-0.0473489	0.320085	-0.278393
11.1667	0.0287079	-0.14579	0.6132	-0.341806	-0.231228	-0.573658	-0.144264			11.1667	-0.0182404	0.557423	0.405663	-0.071514	-0.185047	0.0479823	0.137002			11.1667	0.815148	0.632865	0.352831	0.0609707	0.0122571	0.185695	0.435192			11.1667	-0.318712	-0.00628518	0.243817	-0.228543	-0.189659	0.283625	-0.0431805
11.2	-0.710222	-0.0309255	-0.239996	-0.0394538	-0.502943	-0.285001	-0.252074			11.2	0.289599	0.573233	0.479605	-0.131262	-0.255527	-0.107363	0.286364			11.2	0.69605	0.428503	0.46305	0.0356994	-0.0323428	0.692532	0.113611			11.2	-0.35362	0.0286228	-0.0286612	-0.0765748	-0.163196	0.137787	-0.140944
11.2333	-0.554071	-0.157415	-0.135919	-0.325567	-0.02389	0.0519662	-0.454216			11.2333	0.280339	0.493422	0.632822	-0.218893	-0.419979	-0.100193	0.193024			11.2333	1.59986	0.473239	0.408715	-0.245882	-0.0151779	0.318394	0.513467			11.2333	-0.370492	0.0798213	-0.0518921	-0.214508	-0.0314715	0.351515	-0.199505
11.2667	-0.318271	0.35202	0.635015	-0.556727	-0.25173	-0.288624	-0.144264			11.2667	0.281075	0.455277	1.34769	-0.179459	-0.115612	-0.18862	0.411276			11.2667	1.73511	0.60338	0.390693	-0.194116	-0.0342424	0.371144	0.344154			11.2667	-0.242496	0.181636	0.148958	0.000377294	-0.118504	0.384203	-0.101742
11.3	-0.333811	-0.06754	0.0518549	-0.17584	-0.248934	-0.299494	-0.417156			11.3	0.134123	0.407961	2.52535	-0.0639459	-0.051919	0.113705	1.11154			11.3	3.23236	0.450871	0.191245	-0.346002	0.0734562	0.0497187	0.671278			11.3	-0.308821	0.215381	0.0720057	-0.177242	-0.108507	0.0573251	-0.20386
11.3333	-0.182697	0.166246	0.473567	-0.489438	-0.376977	-0.216158	-0.393573			11.3333	0.270218	0.748221	3.07981	-0.165916	-0.16312	0.0993657	1.35767			11.3333	3.21723	0.401051	0.0550711	0.163189	0.0361261	0.0197903	0.0466386			11.3333	-0.346347	0.14731	0.192031	-0.386319	-0.0873368	0.124587	-0.257582
11.3667	-0.458976	0.29131	0.482646	-0.41801	-0.22868	-0.257222	0.270127			11.3667	0.295522	0.523651	4.40104	-0.154365	-0.140671	-0.329626	1.58319			11.3667	3.78912	0.271927	0.585542	-0.170158	-0.128588	0.0955067	0.376455			11.3667	-0.271004	0.160691	0.10782	0.0197362	-0.0808682	0.576558	0.0308677
11.4	-0.604967	-0.0659539	-0.0852605	-0.518702	-0.476363	-0.394908	-0.248704			11.4	0.560489	0.50609	5.05145	-0.113338	-0.269101	-0.113338	2.26018			11.4	2.68911	0.302428	0.379414	-0.0327379	0.0555209	0.185203	0.281442			11.4	-0.173553	0.103093	0.197839	-0.301139	-0.213181	0.0673828	-0.314207
11.4333	0.107077	0.0304651	0.147001	-0.104735	-0.408485	-0.0953815	-0.373359			11.4333	0.14764	0.543919	4.32329	-0.0444282	-0.0138077	0.111315	0.756148			11.4333	4.62537	0.21804	0.277703	-0.0866579	-0.0952055	-0.0359479	0.141241			11.4333	-0.268386	0.29276	0.242365	-0.17095	-0.122032	0.152874	-0.241126
11.4667	-0.541783	0.19184	-0.0539845	-0.456442	-0.306693	-0.403362	0.0780922			11.4667	-0.182963	0.607894	3.48775	-0.0989981	-0.35472	0.0599319	0.917951			11.4667	4.25389	0.099083	0.248868	0.00889639	-0.310201	-0.167649	-0.0123195			11.4667	-0.294276	0.227599	0.15283	-0.141428	-0.313738	0.243394	-0.102709
11.5	0.311919	0.276433	0.348221	-0.304083	-0.244008	-0.248768	-0.147633			11.5	0.0319562	0.557714	4.11052	-0.0838619	-0.262836	-0.125287	0.875443			11.5	3.82967	0.072648	0.550961	-0.110856	-0.168784	-0.145119	0.360557			11.5	-0.26635	0.120547	0.110724	-0.309367	-0.143202	0.0994421	-0.228059
11.5333	0.665394	-0.0299079	0.0209498	-0.31075	-0.376914	-0.13403	-0.188062			11.5333	0.164503	0.74336	3.97189	-0.269479	-0.246651	0.0886111	1.32634			11.5333	2.71998	0.039096	0.200453	0.0357157	-0.13857	0.189788	0.511322			11.5333	-0.30853	0.206072	0.305282	-0.154979	-0.216709	0.188076	-0.0276933
11.5667	-0.822999	0.0267525	0.379392	-0.436233	-0.324329	-0.193211	-0.393573			11.5667	0.278468	0.594019	3.62639	-0.242792	-0.164686	-0.127677	1.21067			11.5667	2.83868	0.10925	0.119345	0.0270244	-0.167771	0.249178	0.215643			11.5667	-0.0560291	0.0507312	0.0976564	-0.0397927	-0.0573459	0.101957	-0.219832
11.6	-0.451477	0.231107	-0.251997	-0.515035	-0.388276	0.0362652	0.115152			11.6	-0.236568	0.537672	2.29911	0.0479822	-0.119266	0.0360326	0.488587			11.6	2.73636	0.279044	0.55109	-0.0466379	-0.0875659	0.0897673	0.346364			11.6	-0.254714	-0.0394478	0.0918486	-0.236771	-0.154963	-0.0250231	-0.0388247
11.6333	-0.592904	0.100793	0.0708849	-0.469809	-0.6049	-0.170263	-0.00276479			11.6333	-0.114118	0.567598	2.91906	-0.194993	-0.361507	-0.130067	0.597673			11.6333	1.97254	0.292261	0.394279	0.0763082	-0.0995646	0.116731	0.139906			11.6333	-0.352456	0.124038	0.21865	-0.0257574	-0.0285312	0.215107	-0.154495
11.6667	-0.425525	-0.294958	0.000194982	-0.527061	-0.550089	-0.15577	-0.127419			11.6667	0.345612	0.131558	3.54542	0.0173115	-0.329139	-0.0762938	0.936997			11.6667	2.14164	0.268877	0.088031	-0.163272	-0.0258643	-0.0220004	0.0949084			11.6667	-0.217479	0.0105871	0.218166	-0.293396	-0.0891009	0.185562	-0.117713
11.7	-0.76105	-0.247284	-0.0610057	-0.221743	-0.654209	-0.0349931	0.0444018			11.7	0.0632101	0.545833	4.00207	-0.0902351	0.0613705	-0.0894384	1.17736			11.7	2.20899	0.210923	0.066107	-0.0738268	-0.0136297	-0.00827506	0.427166			11.7	-0.228824	0.157201	0.0265119	-0.0969019	-0.0314715	0.168589	-0.114325
11.7333	-0.631027	-0.387618	0.108308	-0.459938	-0.471455	-0.125576	-0.0634074			11.7333	-0.0975699	0.40726	2.61897	-0.0452248	-0.203842	-0.234029	0.609043			11.7333	1.91113	0.475272	0.200772	0.0732636	-0.172671	0.0210011	0.204503			11.7333	-0.27275	0.0984389	-0.0591518	-0.14046	0.137301	0.165446	-0.214508
11.7667	-0.533475	-0.374353	0.0563223	-0.392705	-0.204235	-0.136446	-0.107205			11.7667	0.119331	0.456401	2.66799	-0.0810737	-0.279542	-0.0834636	0.636302			11.7667	1.42022	0.0767149	0.524233	-0.179898	0.0202114	-0.00637813	0.302254			11.7667	-0.20817	0.0646945	0.064262	-0.221283	-0.189071	-0.030052	-0.265809
11.8	0.59065	0.316123	0.0331026	-0.323296	-0.746994	-0.0349931	0.0342946			11.8	0.018267	0.583309	3.0016	-0.144407	-0.201231	0.128045	0.680009			11.8	1.82732	0.129585	0.545767	-0.0967147	-0.0658837	-0.0610373	0.095838			11.8	-0.354202	0.0600401	0.123307	-0.123036	0.123187	0.157274	-0.304043
11.8333	-0.434007	0.171773	-0.08708	0.0140884	-0.638845	-0.148523	-0.117312			11.8333	0.31024	0.242028	2.60028	-0.25992	-0.240387	0.0659067	0.973548			11.8333	1.49142	0.201772	0.381242	-0.087128	-0.0989618	0.132133	0.256194			11.8333	-0.336166	0.139165	0.14557	-0.186437	-0.236115	0.0478958	-0.0828666
11.8667	-0.144315	-0.139651	-0.16492	-0.422964	-0.457553	-0.241522	0.229699			11.8667	-0.25317	0.621274	2.24602	0.0388209	-0.202797	0.0778564	0.854569			11.8667	1.60247	0.449854	0.572929	-0.231862	-0.103716	0.506639	0.2151			11.8667	-0.398419	0.125783	0.0163484	-0.113357	-0.267282	-0.0482818	0.02506
11.9	-0.42961	-0.0473819	-0.140809	-0.113582	-0.693294	-0.292248	-0.0903598			11.9	-0.212375	0.615465	1.57285	-0.306922	-0.218982	0.0181083	0.545781			11.9	1.10626	0.518992	0.563947	-6.07956e-06	0.132237	0.4935	0.117006			11.9	-0.287004	0.118802	0.161057	-0.184985	-0.348434	-0.104857	0.0613582
11.9333	-0.205359	-0.0925441	-0.205638	-0.54983	-0.215633	-0.0434475	0.0275566			11.9333	-0.207833	0.457278	1.65158	-0.132059	-0.241431	-0.0153507	0.522941			11.9333	0.320866	0.442737	0.242874	0.135011	0.0230516	0.0543655	0.260409			11.9333	-0.248314	0.128111	0.119919	-0.308883	-0.10439	0.188705	-0.246934
11.9667	-0.743758	-0.00188163	0.219156	-0.498564	-0.585364	-0.154562	0.307187			11.9667	0.0260003	0.43711	2.07332	-0.274259	-0.151112	-0.171891	0.413367			11.9667	-0.0122552	0.483406	0.734308	0.185958	-0.0436979	0.0648016	0.590023			11.9667	-0.371947	0.184545	0.286891	0.0845889	-0.321971	0.161046	-0.223703
12	-0.581001	-0.27021	0.113587	-0.182883	-0.319235	0.0604206	-0.221752			12	0.095039	0.62692	1.75497	-0.265098	-0.26388	-0.0595643	0.288512			12	2.536	0.0634975	0.784164	0.00928548	-0.0659834	0.149464	0.470612			12	-0.220679	0.255525	0.00473303	-0.337922	-0.131441	0.127101	-0.240158
12.0333	-0.611211	0.0120761	-0.201703	-0.604131	-0.29397	-0.164224	0.0881993			12.0333	-0.0297326	0.330935	1.72242	-0.0659375	-0.262313	0.159114	0.640234			12.0333	2.91523	0.515941	0.5191	0.00717433	0.105424	0.471308	0.252464			12.0333	-0.281477	0.184545	0.176544	-0.0310811	-0.171429	0.0950418	-0.145299
12.0667	-0.500998	-0.274743	-0.0327581	-0.204677	-0.293792	-0.416648	0.000604237			12.0667	0.0916463	0.626454	1.70303	-0.236419	-0.471142	-0.0237155	0.310537			12.0667	1.36651	0.243458	0.522777	-0.174797	-0.068858	0.385475	0.395308			12.0667	-0.204097	0.303233	0.0918486	-0.0891582	-0.158492	0.183047	-0.140944
12.1	-0.532997	0.313333	-0.00897424	-0.110919	-0.384416	0.0266031	-0.137526			12.1	0.279243	0.39982	1.68017	-0.156755	-0.201753	0.108925	0.684044			12.1	1.6554	0.344114	0.336629	0.0691706	-0.110591	0.520722	0.0733096			12.1	-0.238424	0.255525	0.105884	-0.185953	-0.184366	0.0491531	-0.216928
12.1333	-0.746462	0.239914	-0.0854883	-0.420826	-0.541156	-0.183549	-0.221752			12.1333	0.123577	0.327903	1.10793	-0.160339	-0.00441048	-0.162331	0.398687			12.1333	3.27322	0.0807818	0.171136	0.0241895	-0.00932782	0.171717	0.316237			12.1333	-0.190425	-0.0411932	-0.0664113	-0.205796	-0.175545	-0.041367	-0.195633
12.1667	-0.164093	-0.36404	-0.00999683	-0.193834	-0.420999	-0.295871	0.196008			12.1667	0.0698117	0.563033	1.48479	-0.124491	-0.206974	-0.130067	0.549876			12.1667	2.34864	0.375633	0.375963	-0.00502802	0.151297	0.1616	0.536479			12.1667	-0.424891	0.0105871	0.0555504	-0.176758	-0.134969	0.200649	-0.185469
12.2	-0.293512	-0.161699	0.101478	-0.0948251	-0.430227	-0.0796806	0.202747			12.2	0.0808597	0.2627	1.20036	-0.305727	-0.223158	-0.0631493	0.431064			12.2	1.57726	0.592196	0.2488	-0.0653251	0.113307	0.220153	0.375509			12.2	-0.213406	0.188036	-0.0330171	0.0119927	-0.233175	0.326371	-0.155463
12.2333	-0.716111	0.29335	-0.213153	0.0909909	-0.301319	-0.0712261	0.135366			12.2333	0.326543	0.537888	1.31801	-0.130864	-0.278498	0.130435	0.292044			12.2333	1.95077	0.422402	0.32881	-0.0473318	0.0699031	-0.0126536	0.296411			12.2333	-0.267514	0.184545	-0.0291452	-0.162239	-0.340201	0.326371	-0.158851
12.2667	-0.119162	0.157546	-0.0333782	-0.0720207	-0.459487	-0.194418	-0.208276			12.2667	0.00769746	0.3943	1.00682	-0.228054	0.0932168	-0.153966	0.33044			12.2667	2.00905	0.299378	0.504805	-0.0691746	-0.200109	-0.056054	0.119218			12.2667	-0.337911	0.277633	0.128631	-0.185953	-0.069695	0.147845	-0.203376
12.3	-0.382547	-0.0766506	-0.0681159	-0.11243	-0.534406	-0.117121	-0.252074			12.3	0.239133	0.564321	0.95835	-0.0985998	-0.232555	-0.03925	0.332165			12.3	1.70004	0.356315	0.373118	-0.0805154	-0.117908	0.312142	0.362485			12.3	-0.219224	0.174073	-0.00349454	-0.205312	-0.170253	0.167332	0.0226402
12.3333	-0.414707	-0.108867	0.667474	-0.0577109	-0.4265	-0.172679	0.266758			12.3333	-0.0583147	0.83703	1.0084	-0.400925	-0.343235	-0.0261054	0.180159			12.3333	1.13184	0.083832	0.440416	-0.0088231	-0.038839	-0.0936954	0.22504			12.3333	-0.219515	0.181636	0.128631	0.0589382	-0.0191223	0.218878	-0.12594
12.3667	0.292986	-0.160154	0.248854	-0.0949742	-0.438678	-0.149731	0.222961			12.3667	0.312852	0.605535	0.753119	-0.0432332	-0.229945	0.106536	0.178083			12.3667	1.30014	0.288194	0.300672	-0.02067	0.0239329	-0.133716	0.384831			12.3667	-0.206424	0.337559	0.253497	-0.262421	-0.166136	-0.00742197	-0.2208
12.4	-0.180796	-0.0774232	0.474598	-0.160795	-0.341167	-0.147315	-0.0330861			12.4	-0.0392225	0.776088	0.796436	0.106934	-0.0712355	0.0742715	0.251111			12.4	0.881971	0.0126611	0.164751	0.00898405	-0.122109	-0.189927	0.357165			12.4	-0.297476	0.324759	0.227846	0.0570023	-0.189071	-0.0916559	-0.0446325
12.4333	-0.531572	0.48304	0.293632	-0.375866	-0.43196	0.0410963	0.172425			12.4333	0.172058	0.469153	0.889369	-0.101388	-0.308778	-0.121702	0.297335			12.4333	0.905722	0.269893	0.293434	-0.320992	0.0143692	-0.230721	-0.281301			12.4333	-0.278859	0.0582947	0.294634	-0.176274	-0.227882	0.143445	-0.226123
12.4667	-0.149336	0.177227	0.740989	-0.344847	-0.313411	-0.176302	0.36446			12.4667	-0.0108821	0.581402	0.681037	-0.0822687	-0.288939	0.057542	0.370536			12.4667	0.959463	0.15602	0.437049	-0.146498	-0.0892509	-0.2226	0.243247			12.4667	-0.139517	0.427156	0.364327	-0.288072	-0.121444	0.0441242	-0.074155
12.5	-0.369532	-0.0854652	0.209735	-0.220965	-0.055728	-0.0265387	-0.201538			12.5	-0.0966787	0.476841	0.553023	-0.0906335	-0.224202	0.174648	0.0454744			12.5	0.919709	0.0787484	0.75103	-0.221232	-0.0212622	0.0474509	0.347882			12.5	-0.265186	0.0908755	0.324157	-0.0451165	-0.204948	0.100071	-0.101258
12.5333	-0.764275	-0.242699	0.563207	-0.42321	-0.528176	-0.309157	-0.3363			12.5333	0.323481	0.484437	0.638119	-0.0922267	-0.246651	0.12446	0.194586			12.5333	0.946323	0.486456	0.415751	-0.215646	-0.117758	0.184919	0.17421			12.5333	-0.353329	0.0763305	0.249625	0.0410312	-0.306094	-0.0734263	0.0119927
12.5667	-0.100423	0.325123	0.286498	-0.414294	-0.584701	-0.288624	0.0545089			12.5667	-0.0610807	0.290905	0.813519	-0.297362	-0.346367	-0.00101118	-0.017379			12.5667	1.04016	0.341064	0.367913	-0.160184	0.0652857	0.0604467	0.145165			12.5667	-0.288167	0.0670217	0.135406	-0.188373	-0.276691	0.0189797	-0.101258
12.6	-0.61093	-0.205791	0.563984	-0.113295	-0.719741	-0.0833038	-0.137526			12.6	0.130429	0.350756	0.879267	-0.175874	-0.185569	0.171064	0.443271			12.6	0.909219	0.486456	0.784135	-0.146202	0.139455	-0.0886463	0.0816102			12.6	-0.324239	0.0588765	0.199775	-0.131748	-0.18319	0.313799	-0.034953
12.6333	-0.596784	-0.262717	0.263388	-0.709336	-0.647393	0.0664594	-0.363252			12.6333	-0.107974	0.410675	0.64812	-0.0766922	-0.0639266	0.172259	0.296872			12.6333	0.390894	0.20889	0.37347	0.0187922	-0.178631	0.135166	0.29047			12.6333	-0.446708	-0.0662106	-0.21112	-0.276457	-0.211417	-0.0432528	-0.199505
12.6667	-0.0825818	0.312866	0.774301	-0.308078	-0.413696	-0.614722	0.0376636			12.6667	-0.248901	0.594433	0.819658	-0.102185	-0.14798	-0.115728	0.268995			12.6667	0.458504	0.254642	0.366988	-0.127419	-0.0188132	-0.0349598	0.360011			12.6667	-0.336748	0.0326955	0.0294158	-0.223219	-0.303153	0.0749262	-0.380028
12.7	-0.864484	-0.0978268	-0.224892	-0.139928	-0.645604	-0.169055	0.148842			12.7	0.0586528	0.453683	1.3863	-0.14122	-0.28163	-0.0344701	0.819706			12.7	0.0583781	0.405118	0.50149	-0.117052	-0.022554	0.387944	0.26075			12.7	-0.339657	-0.0516655	0.0976564	-0.207248	-0.105566	-0.138802	-0.204828
12.7333	-0.380383	0.0918883	0.410434	-0.419457	-0.47548	-0.229444	0.0174495			12.7333	0.306014	0.821177	1.92072	0.089806	-0.0915963	0.0181083	1.11015			12.7333	0.293598	0.414269	0.532649	-0.167021	-0.029829	0.496398	0.539026			12.7333	-0.335293	0.24098	0.139762	-0.164174	-0.0596982	0.0724117	-0.326306
12.7667	-0.0361496	0.0822002	0.446449	-0.432146	-0.66613	-0.2693	-0.107205			12.7667	0.237112	0.658275	1.78696	-0.0137575	-0.192356	0.159114	0.712773			12.7667	0.544193	0.309546	0.697018	-0.089519	-0.00783479	0.442645	0.269994			12.7667	-0.390855	0.0588765	0.0449029	-0.266777	-0.187894	0.247794	-0.367444
12.8	-0.240445	-0.016919	0.283404	-0.557144	-0.403736	-0.184756	-0.363252			12.8	-0.129846	0.884369	1.71605	-0.0802771	-0.104126	-0.0428348	0.680072			12.8	1.38956	0.371566	0.448027	-0.0251947	0.110434	0.0945201	0.239058			12.8	-0.359729	-0.0667924	0.0328036	-0.251774	-0.220826	0.0510389	-0.406646
12.8333	-0.108718	0.192116	-0.0741358	-0.585541	-0.426901	-0.0386164	-0.231859			12.8333	0.0406647	0.653443	1.58128	-0.158348	-0.00493253	0.191378	0.906383			12.8333	1.34983	0.120434	0.278148	-0.0578345	0.073135	0.0677516	0.153934			12.8333	-0.288458	0.36374	0.00376512	-0.0335011	-0.0749876	0.291797	-0.0417286
12.8667	-0.234331	-0.0872811	0.210936	-0.189881	-0.388123	-0.0386164	-0.103836			12.8667	0.194564	0.717998	1.92944	0.0137266	-0.0106753	-0.107363	0.751721			12.8667	0.924359	0.353265	0.32586	0.0737049	-0.222935	0.479727	0.361472			12.8667	-0.20817	0.296251	0.117499	-0.0794787	-0.0491132	0.0950418	0.085557
12.9	-0.681265	-0.150531	0.0881411	-0.241428	-0.18809	-0.381623	-0.211645			12.9	-0.143436	0.60743	1.67586	-0.0886418	-0.215849	0.157919	0.843213			12.9	1.2785	0.185505	0.37433	0.219651	-0.200927	0.110937	0.557083			12.9	-0.305621	0.0856393	0.18816	-0.0354369	-0.273163	0.0837267	0.0328036
12.9333	-0.293202	-0.073338	0.106404	-0.297499	-0.684716	-0.367129	-0.110574			12.9333	-0.122259	0.580523	1.09291	0.0667033	-0.173039	-0.236419	0.69711			12.9333	1.96992	0.1001	0.452633	-0.227017	-0.0745844	-0.00253584	0.286537			12.9333	-0.370492	0.0966935	0.133954	-0.191277	-0.107919	-0.108629	-0.0973858
12.9667	-0.622295	-0.187825	-0.165507	-0.244594	-0.587846	-0.147315	-0.12405			12.9667	0.108527	0.291968	1.05513	-0.0113675	-0.0409554	0.361063	0.497804			12.9667	2.57512	0.285144	0.293018	-0.00489637	-0.274006	0.244802	0.197769			12.9667	-0.364383	0.228762	0.0274799	-0.259518	-0.257873	-0.083484	-0.232415
13	-0.310067	-0.101621	0.123661	-0.263772	-0.369295	-0.432349	-0.64962			13	-0.0990239	0.406313	1.50076	0.0894076	-0.0821991	0.0790514	0.614435			13	2.2554	0.496624	0.494802	-0.185685	-0.196753	0.370126	0.530581			13	-0.321039	0.357922	0.177512	-0.17337	-0.158492	-0.0470245	-0.176274
13.0333	-0.614873	0.0374345	0.092782	-0.37104	-0.43144	-0.237898	-0.538442			13.0333	0.0307411	0.360429	1.13138	-0.0300886	-0.1934	-0.070319	0.640712			13.0333	1.83732	0.48544	0.390188	-0.10213	-0.0392305	0.12193	0.298532			13.0333	-0.368456	0.0257138	0.147506	-0.174338	-0.229646	0.125844	-0.290008
13.0667	-0.019371	-0.0080757	0.481216	-0.511077	0.126955	-0.41544	-0.0431932			13.0667	0.188165	0.376331	0.885008	-0.211325	-0.0477423	0.178233	0.53637			13.0667	1.29408	0.48849	0.349181	0.191907	0.0440438	-0.0836752	0.226958			13.0667	-0.247732	0.0548039	0.172673	-0.141428	-0.284336	0.149731	-0.229511
13.1	-0.503518	-0.148135	0.317512	-0.174794	-0.336784	-0.18838	-0.444109			13.1	0.509059	0.834275	0.790413	-0.111346	-0.0393892	0.174648	0.230445			13.1	1.40556	0.610497	0.613335	-0.152568	-0.00854864	0.33995	0.284518			13.1	-0.362929	0.0326955	0.270919	-0.0485043	-0.266694	-0.0401098	-0.189341
13.1333	-0.705082	-0.2518	0.790703	-0.360551	-0.46235	-0.355052	-0.268919			13.1333	-0.0573471	0.294083	0.966576	-0.0237155	-0.220548	-0.182645	0.338639			13.1333	1.40145	0.26481	0.447804	-0.0202003	-0.00151061	-0.23195	0.301807			13.1333	-0.275659	0.190945	0.338676	-0.162722	0.0831995	0.0604681	-0.147719
13.1667	-0.459104	0.172708	0.365475	-0.310595	-0.37361	-0.3937	-0.120681			13.1667	0.155242	0.437484	0.849438	0.0288629	-0.224202	-0.00220616	0.828652			13.1667	1.58931	0.364449	0.39053	-0.104407	-0.140566	-0.0247009	0.253843			13.1667	-0.30504	-0.0691196	0.206551	-0.146267	-0.0438206	-0.0551965	-0.220315
13.2	-0.337087	0.023266	0.163473	-0.234964	-0.0935929	-0.266885	-0.373359			13.2	-0.180902	0.366792	1.05834	-0.050403	-0.244041	-0.185035	0.452598			13.2	0.784389	0.552544	0.295058	0.0165533	-0.0466368	-0.0401161	0.216514			13.2	-0.279149	0.206654	0.125243	-0.165142	-0.12556	0.0717831	-0.184017
13.2333	-0.362287	-0.0562202	0.394418	-0.496587	-0.5464	-0.0869271	-0.211645			13.2333	0.044097	0.414791	1.00406	0.136808	-0.196011	0.12207	0.158583			13.2333	1.28569	0.21194	0.440863	-0.0615342	-0.168525	0.178963	0.359875			13.2333	-0.218642	0.332904	0.115563	-0.386803	-0.127325	0.333914	-0.259518
13.2667	-0.546038	-0.37323	-0.0473298	-0.316618	-0.646052	-0.0446552	-0.349776			13.2667	0.113125	0.410762	0.586827	-0.0496063	-0.259181	-0.0727089	0.400142			13.2667	0.585402	0.15602	-0.00393746	-0.0116924	-0.11674	0.00709949	0.205856			13.2667	-0.224751	0.232253	0.171705	-0.0373728	-0.12556	0.134644	-0.0746389
13.3	-0.219853	-0.438279	0.4375	-0.340104	-0.310005	-0.263261	-0.1948			13.3	-0.0115164	0.607572	0.577771	-0.247173	-0.119266	-0.0261054	0.87069			13.3	0.633404	0.1123	0.174102	-0.0321281	-0.0628782	0.0449506	0.419246			13.3	-0.197407	0.195018	0.41708	-0.0756069	-0.110859	0.303112	-0.034469
13.3333	-0.258925	-0.124127	-0.21929	-0.369462	-0.228116	-0.183549	-0.481168			13.3333	0.0221029	0.622049	0.579959	-0.121304	-0.0790666	0.11012	0.477906			13.3333	0.404974	-0.0412255	0.21572	-0.0683708	-0.115886	0.089528	0.101858			13.3333	-0.339366	0.289851	0.024576	-0.0683472	-0.116152	0.0805837	-0.216928
13.3667	0.0578155	-0.0913826	-0.244079	-0.213431	-0.442356	-0.429933	-0.44074			13.3667	0.705464	0.576791	0.780269	-0.259522	-0.242997	0.0969757	0.265637			13.3667	0.852296	0.0584139	0.195437	-0.236462	-0.201766	0.132132	-0.0970817			13.3667	-0.348675	0.00942349	0.183804	-0.125456	-0.343141	0.157274	-0.0712511
13.4	-0.311313	-0.179606	-0.494952	-0.303509	-0.534864	-0.239106	0.22633			13.4	0.221172	0.725456	0.655011	-0.103778	-0.0832432	-0.127677	0.473965			13.4	1.8232	0.340047	0.356538	-0.183354	0.039744	0.404307	0.295926			13.4	-0.249478	0.148474	0.191548	-0.184985	-0.0696951	0.181162	-0.09303
13.4333	-0.332346	-0.151029	0.189231	-0.587653	-0.273461	-0.298287	-0.0431932			13.4333	0.0127669	0.332299	0.746254	-0.293379	-0.152679	0.217667	0.38184			13.4333	0.828808	0.502724	0.40068	-0.143657	0.0126102	0.362457	0.263281			13.4333	-0.33413	0.364322	0.168801	-0.104645	-0.344317	-0.0658829	-0.127392
13.4667	-0.445538	-0.19752	-0.230976	-0.52354	-0.390879	-0.333312	0.0780922			13.4667	0.0937996	0.760322	0.452845	-0.0436315	-0.135972	-0.145602	0.355029			13.4667	1.97471	0.272943	0.540838	-0.0133578	0.104121	0.282372	0.495281			13.4667	-0.27624	0.274143	0.288343	-0.198537	-0.252581	0.00703612	0.00908886
13.5	-0.433642	-0.411848	-0.102881	-0.358362	-0.471349	0.142549	-0.127419			13.5	-0.0451182	0.427501	0.693148	-0.0109693	-0.241431	-0.177866	0.555351			13.5	1.45927	0.181438	0.359642	0.00234085	-0.0321871	-0.00493252	0.349237			13.5	-0.0711559	0.194436	-0.127876	-0.212572	-0.207888	0.0472673	-0.0354369
13.5333	-0.253922	-0.245735	0.236926	-0.3993	-0.293534	-0.0168766	-0.0634074			13.5333	0.154896	0.392805	0.331325	0.0471856	-0.0513968	-0.0762938	0.184744			13.5333	2.59185	0.209906	0.209582	0.20796	-0.0532606	-0.0502899	0.435752			13.5333	-0.316385	0.154873	0.333836	-0.171918	-0.22847	0.0422383	-0.147235
13.5667	-0.611973	0.128904	0.0108427	-0.276831	-0.330028	-0.195626	0.408258			13.5667	0.0750849	0.291914	0.478793	-0.189019	-0.228379	0.26905	0.182372			13.5667	2.48809	0.38885	0.447187	-0.141393	-0.0934261	0.0224235	0.576203			13.5667	-0.29864	0.1764	0.290279	-0.114325	-0.423705	-0.0910274	-0.25129
13.6	-0.461795	-0.0541247	-0.278864	-0.326696	-0.40209	0.0942381	0.0477708			13.6	0.121718	0.468367	0.56378	-0.241995	-0.269101	-0.131262	0.238403			13.6	2.06777	0.0431629	0.274466	0.0105886	-0.140229	-0.076719	0.370999			13.6	-0.274786	0.146147	0.127179	-0.122069	-0.0855726	0.0139508	-0.0756069
13.6333	-0.235268	0.310668	0.0172628	-0.329491	-0.705311	-0.28017	0.290341			13.6333	0.144719	0.488766	0.561615	0.00735357	-0.128141	-0.038055	0.0966828			13.6333	1.83953	0.0939993	0.356384	-0.11319	-0.302142	-0.0613409	0.226127			13.6333	-0.141263	0.296251	0.0240921	-0.344697	-0.172605	0.00829328	0.0623261
13.6667	0.106372	-0.144222	-0.0912187	-0.442605	-0.438147	-0.102628	0.142104			13.6667	0.196988	0.63663	0.465351	-0.135644	-0.108302	-0.185035	0.207576			13.6667	1.60157	0.346148	0.255173	0.0158223	-0.00634695	0.0887662	0.116209			13.6667	-0.200025	-0.0929734	0.0782973	-0.17095	-0.026767	0.191219	-0.222251
13.7	-0.738379	-0.272747	-0.162569	-0.474815	-0.298002	-0.0651873	-0.140895			13.7	-0.00782013	0.566284	0.286458	-0.0496063	-0.371426	0.0312528	0.319073			13.7	1.83178	0.314629	0.350792	-0.130405	-0.119986	0.00080615	0.156855			13.7	-0.244241	0.0681853	0.043935	-0.197569	-0.430762	0.17739	-0.20144
13.7333	-0.597149	-0.0362454	-0.160878	-0.405606	-0.556915	-0.0990048	-0.174586			13.7333	0.0367125	0.83583	0.553972	-0.200172	-0.0806328	0.324019	0.355918			13.7333	1.42032	0.204823	0.242123	-0.28022	-0.158436	-0.132395	-0.0750717			13.7333	-0.388819	-0.0889008	0.0758775	-0.0954499	-0.277867	-0.0199942	-0.271133
13.7667	-0.447253	0.068812	0.210715	-0.231955	-0.655386	-0.432349	0.543019			13.7667	-0.239855	0.628432	0.55743	0.0105401	-0.037823	0.0443974	0.68791			13.7667	1.14071	0.223124	0.504351	-0.116912	-0.243052	-0.239137	0.161811			13.7667	-0.259077	-0.00919411	0.124759	-0.181114	-0.165548	0.122072	-0.178694
13.8	-0.512004	0.301482	0.111011	-0.484527	-0.54761	-0.309157	0.0578779			13.8	-0.276079	0.494786	0.438273	-0.355119	-0.216371	-0.159941	0.48575			13.8	1.29055	0.241425	0.257924	-0.116342	-0.0684766	0.151862	0.177116			13.8	-0.223297	0.288688	-0.0267254	-0.092546	-0.016182	0.288025	-0.248386
13.8333	-0.781646	0.142981	0.346922	-0.316929	-0.357842	-0.117121	0.361091			13.8333	-0.0340368	0.501306	0.396533	-0.323253	-0.123443	0.1149	0.513888			13.8333	1.53212	0.183471	0.157121	-0.327224	-0.177183	0.251151	0.281197			13.8333	-0.313476	-0.0702832	0.0192523	-0.155947	-0.213769	0.012065	-0.233383
13.8667	-0.321304	0.219403	0.117934	-0.445464	-0.47106	-0.321234	-0.258812			13.8667	-0.0942329	0.361314	0.514406	-0.156755	-0.185569	-0.0679291	0.126207			13.8667	0.677049	0.0950161	0.422596	-0.0117571	-0.0951348	0.259257	0.0696375			13.8667	-0.436236	0.00418727	0.137342	-0.135136	-0.134381	-0.0445101	-0.14046
13.9	-0.200168	0.0214577	-0.0259783	-0.362797	-0.350123	-0.257222	0.0444018			13.9	0.126275	0.303831	0.397215	-0.268683	-0.320786	-0.149186	0.349012			13.9	0.637404	0.433586	0.182305	-0.0836184	0.00426631	-0.21351	0.11514			13.9	-0.256168	0.130438	0.162509	-0.152559	-0.178485	0.0956704	-0.2842
13.9333	-0.308241	-0.0570887	0.13558	-0.514807	-0.241472	-0.357467	0.152211			13.9333	-0.000685643	0.381363	0.60287	-0.158348	-0.314521	0.226032	0.428431			13.9333	1.34257	0.220074	0.492678	0.0140885	-0.227179	-0.302321	0.131806			13.9333	-0.331802	-0.0458476	0.0749095	-0.188373	-0.344317	0.116415	-0.18063
13.9667	-0.304039	0.169307	0.047534	-0.569866	-0.58951	-0.297079	-0.248704			13.9667	0.0319782	0.293774	0.427634	0.0467872	-0.170951	-0.242394	0.434917			13.9667	0.537938	0.0106276	0.429272	-0.046214	-0.165123	-0.0529646	0.375738			13.9667	-0.291367	0.191527	0.101528	-0.254678	-0.257285	-0.0149654	-0.179662
14	-0.198522	-0.204341	-0.00578536	-0.511333	-0.438517	-0.0627718	-0.167848			14	-0.0445064	0.349941	0.518279	-0.0743022	-0.225246	0.101756	0.225732			14	0.272907	0.265826	0.221796	-0.197821	-0.219993	0.0162468	0.221612			14	-0.376601	0.171746	0.154765	-0.0881903	-0.161432	0.0680115	-0.0712511
14.0333	-0.713978	0.0500227	0.194712	-0.514159	-0.508574	-0.460128	-0.022979			14.0333	-0.138979	0.309192	0.368926	-0.203358	-0.301991	-0.0428348	0.30178			14.0333	0.379127	0.134668	0.219699	-0.238409	-0.168678	0.14846	0.319526			14.0333	-0.3958	0.0530584	0.141214	-0.113357	-0.344905	0.159789	-0.256614
14.0667	-0.0297968	-0.114134	0.401925	-0.0719413	-0.627892	-0.237898	-0.107205			14.0667	0.128689	0.492143	0.507838	-0.0743022	0.0378774	-0.292582	0.522443			14.0667	0.184923	0.133652	0.0780908	0.103206	-0.0602787	0.100807	0.148684			14.0667	-0.297476	-0.186643	0.29899	0.00860486	-0.327852	0.0277803	-0.0625396
14.1	-0.663289	-0.0470593	0.227647	-0.304374	-0.256759	-0.119537	-0.1948			14.1	-0.0238255	0.172617	0.304094	-0.0870485	-0.257615	-0.0762938	0.258275			14.1	0.440865	0.0492633	0.230542	-0.121572	-0.168958	-0.0233296	0.0366007			14.1	-0.426636	0.208399	0.199775	-0.117713	-0.497212	0.315056	-0.247902
14.1333	-0.529395	0.181756	-0.134303	-0.428018	-0.527149	-0.304325	-0.184693			14.1333	-0.16891	0.353835	0.333369	-0.204155	-0.110391	0.139994	0.0860735			14.1333	0.603722	0.0604473	0.160177	-0.0261291	-0.300625	0.00990914	0.174557			14.1333	-0.329475	0.0129143	0.0599063	-0.243546	-0.353726	0.166075	-0.139976
14.1667	-0.559402	0.278444	0.282397	-0.159414	-0.419762	-0.355052	0.0881993			14.1667	0.417371	0.356383	0.548237	-0.116126	-0.16573	0.0766614	0.471266			14.1667	0.46771	0.016728	0.52808	0.0330737	-0.116795	-0.0398815	0.124171			14.1667	-0.25675	-0.100537	0.139278	-0.185953	-0.309622	0.17739	-0.0596357
14.2	0.121904	0.0381873	-0.0221401	-0.464541	-0.200196	-0.249976	-0.0970978			14.2	0.0208408	0.315529	0.561158	-0.13644	-0.333837	-0.114533	0.841639			14.2	0.400648	0.233291	0.518644	-0.112925	-0.103433	0.34052	0.400955			14.2	-0.173262	-0.062138	-0.0465684	-0.118681	-0.366075	0.20882	-0.305495
14.2333	-0.626645	-0.059052	0.115779	-0.278871	-0.426067	-0.120745	-0.0465622			14.2333	-0.0277457	0.244455	0.260865	-0.237614	-0.272755	-0.0942183	0.602596			14.2333	0.323387	0.49764	0.445433	-0.0748126	-0.0166915	0.169037	0.0292884			14.2333	-0.269841	0.0559675	0.00328112	-0.0247895	-0.133205	0.0334378	-0.29146
14.2667	-0.736363	0.0405075	-0.200442	-0.251291	-0.531651	-0.00962994	-0.0533004			14.2667	-0.329828	0.262626	0.449296	-0.306922	-0.115612	-0.0667341	0.88614			14.2667	0.452997	0.173304	0.550657	0.00401926	0.015509	-0.163795	0.247201			14.2667	-0.183443	0.229344	0.0933005	0.0923326	-0.00265671	0.20442	-0.144331
14.3	-0.817364	0.0497541	0.351424	-0.46186	-0.452495	0.0978614	-0.140895			14.3	0.129599	0.338414	0.305111	-0.155958	-0.272233	-0.121702	0.442331			14.3	0.892597	0.227191	0.447028	-0.0752176	-0.130263	0.0492353	0.351856			14.3	-0.209334	-0.0539927	0.175576	-0.157883	-0.0714593	0.0623539	0.0313516
14.3333	-0.887226	-0.158961	0.174057	-0.262772	-0.577395	-0.154562	0.0444018			14.3333	-0.0725038	0.528565	0.393288	-0.14361	-0.0644486	0.116095	0.435239			14.3333	0.790355	0.341064	0.602834	-0.0720487	-0.103675	0.200977	0.422417			14.3333	-0.244823	0.27647	0.118467	-0.257098	-0.154375	0.189962	-0.224671
14.3667	-0.294882	0.0426846	0.27994	-0.304848	-0.555332	-0.111083	0.00397332			14.3667	0.127365	0.0419991	0.424586	-0.0460215	-0.343757	0.0611269	0.415846			14.3667	0.613994	0.654216	0.561204	-0.0438444	-0.113049	0.126674	0.531945			14.3667	-0.351584	0.0414225	0.293666	-0.0973858	-0.420765	0.0585822	-0.112873
14.4	-0.175683	-0.155643	0.323283	-0.269973	-0.355501	0.105108	-0.113943			14.4	0.0707432	0.423043	0.330571	-0.126881	-0.151112	-0.0476147	0.511744			14.4	0.102873	0.384784	0.521061	0.060998	0.0877429	-0.140343	0.0145889			14.4	-0.181989	0.231671	0.318833	0.00424902	0.00263584	0.286768	-0.0267253
14.4333	-0.202456	0.310458	0.636422	-0.517079	-0.560995	-0.0567329	0.482377			14.4333	-0.3888	0.337784	0.274543	-0.270276	-0.170951	0.179428	0.355473			14.4333	0.162716	0.146869	0.479271	-0.0924443	0.0283678	0.0899236	0.159708			14.4333	-0.27595	0.331741	0.0845889	-0.0935139	-0.0202984	0.286768	-0.0756069
14.4667	-0.400044	-0.128283	0.401536	-0.242433	-0.559215	-0.0808883	-0.107205			14.4667	-0.0411241	0.236444	0.175852	-0.208536	-0.197577	-0.0846586	0.222416			14.4667	0.847394	0.316663	0.301609	-0.107713	0.232641	-0.0252943	0.371665			14.4667	-0.30853	0.149056	0.0802332	0.103464	0.000283623	0.0862411	-0.0373728
14.5	-0.470805	-0.321525	0.204024	-0.382194	-0.260238	-0.195626	0.475639			14.5	0.0938433	0.312104	0.749006	-0.13644	-0.171473	-0.269878	0.451654			14.5	0.478982	0.261759	0.349913	0.00735826	-0.255505	-0.0498977	0.506504			14.5	-0.315512	-0.0400296	-0.0891582	-0.157399	-0.0620504	0.0931559	-0.179178
14.5333	-0.314311	0.306589	0.751779	-0.266917	-0.0788303	0.108731	0.185901			14.5333	-0.178845	0.40283	1.64646	-0.151577	-0.191834	-0.0571744	1.12571			14.5333	0.068863	0.157036	0.542663	-0.124274	-0.19966	-0.284768	0.474447			14.5333	-0.101991	0.505117	0.163477	-0.417293	-0.161432	0.216364	-0.00204263
14.5667	-0.306071	0.611595	0.647448	-0.229447	-0.372683	-0.0132533	-0.0330861			14.5667	0.534567	0.423625	2.03385	-0.0830653	-0.272755	-0.0989981	0.59467			14.5667	0.581778	0.275994	0.116699	-0.0521805	-0.151724	-0.170821	0.219225			14.5667	-0.13079	0.112984	0.159121	-0.240643	-0.252581	0.0277803	-0.146751
14.6	-0.0748214	0.00963073	0.122234	-0.40359	-0.0497128	-0.132822	-0.218383			14.6	0.0106968	0.251606	2.29903	-0.343567	-0.376125	-0.0655391	0.998926			14.6	-0.17118	0.433586	0.238624	0.0549511	-0.0353356	-0.28073	-0.0170526			14.6	-0.275659	0.0786577	0.165413	-0.0407606	-0.316091	-0.0105651	-0.117229
14.6333	0.0406515	0.197821	0.759086	-0.445763	-0.0510946	-0.0893426	-0.0634075			14.6333	-0.0824378	0.404719	1.95896	-0.13644	-0.113523	0.286975	1.04427			14.6333	0.752868	0.573895	0.422402	-0.0880909	-0.0680923	0.270176	0.145672			14.6333	-0.408018	-0.0830828	0.192031	-0.153527	-0.28316	0.0868698	-0.181114
14.6667	-0.0760755	0.0910801	0.608314	-0.315695	-0.30075	-0.442011	-0.117312			14.6667	-0.13898	0.270712	2.46023	-0.0950149	-0.0863756	0.185403	0.887732			14.6667	0.415122	0.773174	0.260851	-0.0967078	-0.213629	0.00940906	0.0135866			14.6667	-0.368747	0.114729	0.274307	-0.0305972	-0.243172	0.0108078	-0.0412446
14.7	-0.106728	-0.0881583	0.410501	-0.245192	0.433371	-0.0434475	-0.12405			14.7	-0.0349556	0.60377	1.69728	-0.0356651	-0.211151	0.0539571	0.836997			14.7	1.00428	0.378683	0.372193	0.18477	-0.293399	-0.293437	0.168697			14.7	-0.228242	0.27007	0.107336	-0.246934	-0.144378	0.230193	-0.218864
14.7333	-0.220552	0.025606	0.4842	-0.323744	-0.0990531	-0.0676028	0.0444018			14.7333	-0.33279	0.618379	1.47785	-0.118516	-0.200709	0.343138	0.890054			14.7333	1.41729	0.713187	0.298357	-0.137789	0.00132148	0.315834	0.171224			14.7333	-0.379219	0.190363	0.169769	-0.263873	-0.299037	-0.165204	-0.243062
14.7667	-0.516708	0.547139	0.195251	-0.257982	-0.452391	-0.259638	0.202747			14.7667	0.119802	0.463093	1.80554	-0.298557	-0.313476	-0.179061	1.0063			14.7667	0.751829	0.49764	0.266217	0.0352112	-0.245174	-0.0766697	0.174838			14.7667	-0.26955	0.00535086	-0.0775428	-0.268229	-0.234351	0.0962989	-0.18063
14.8	-0.149066	-0.307015	0.102111	-0.188316	-0.303766	-0.210119	-0.167848			14.8	0.126322	0.724226	1.53533	-0.198578	-0.109347	-0.0727089	1.22842			14.8	0.526231	0.431553	0.236607	0.176634	-0.0984962	-0.136449	0.210941			14.8	-0.22446	-0.0528291	0.193484	-0.052376	-0.147318	0.0114364	-0.183533
14.8333	1.0907	-0.136433	0.208824	-0.279971	-0.502567	-0.0374086	-0.0330861			14.8333	-0.0418663	0.613605	1.42193	-0.118914	-0.3093	0.0145233	1.24184			14.8333	0.698304	0.518992	0.338488	-0.0927468	-0.17631	-0.225695	0.0919202			14.8333	-0.308239	0.03095	0.0013452	-0.0373728	-0.00383282	-0.0929132	-0.116261
14.8667	0.144991	0.0612149	-0.0262157	-0.265797	-0.422291	0.0338497	0.0107114			14.8667	0.0402168	0.658933	1.13401	-0.122101	-0.143281	-0.0822686	0.815248			14.8667	0.878745	0.334964	0.361202	-0.195471	-0.162742	0.158581	0.310127			14.8667	-0.371947	-0.13079	0.279147	-0.282264	-0.133793	-0.100457	-0.172886
14.9	0.145645	-0.0717373	0.202236	-0.289805	-0.256267	0.283858	-0.0634074			14.9	-0.177213	0.33591	0.837198	-0.29059	-0.202275	0.0730766	1.34815			14.9	0.766292	0.184488	0.475772	0.057293	-0.112431	0.203928	0.331794			14.9	-0.239296	-0.199443	0.217198	-0.0247895	0.14965	0.173618	-0.233383
14.9333	0.675064	-0.020626	-0.0156637	-0.0974654	-0.407194	-0.135238	0.350984			14.9333	0.383436	0.454174	0.978212	0.0906026	-0.243519	0.142384	1.12922			14.9333	0.107385	0.308529	0.25919	-0.407307	-0.294069	0.16809	0.2789			14.9333	-0.238132	-0.050502	-0.00930228	-0.0814147	-0.284924	-0.0853698	-0.441492
14.9667	-0.191539	0.104502	0.10948	-0.118219	-0.382647	-0.108667	0.637352			14.9667	-0.160025	0.569739	1.09458	-0.272666	-0.283718	-0.0834636	1.16922			14.9667	0.411712	0.234308	0.291813	0.103049	-0.00516995	0.0981539	0.0506887			14.9667	-0.213406	-0.0423568	-0.0606037	-0.294848	-0.306682	0.0453814	-0.106097
15	-0.495675	0.162847	0.354755	-0.296719	-0.20477	-0.0917582	0.468901			15	-0.136344	0.652107	0.7211	-0.0440299	-0.0383451	-0.249563	0.338471			15	0.160807	0.0848487	0.0849171	-0.0603106	-0.135517	0.220381	0.366309			15	-0.383001	0.0245502	-0.00543045	-0.0112382	-0.285512	-0.0778265	-0.148687
15.0333	0.305336	-0.056174	0.899362	-0.317306	0.102726	-0.190795	0.29371			15.0333	0.06384	0.35628	0.710688	-0.15556	-0.277976	0.197353	0.518401			15.0333	0.0756151	0.447821	0.408287	0.120078	-0.0938504	0.216174	0.210015			15.0333	-0.316676	0.0612037	0.085557	-0.321466	-0.223766	-0.00930781	-0.0654434
15.0667	0.359988	0.513368	0.386308	-0.33039	-0.00641609	-0.224613	0.115152			15.0667	-0.0117448	0.409411	0.615244	-0.25753	-0.235688	-0.0225205	0.803895			15.0667	0.318878	0.333947	0.621188	0.0350052	-0.152892	-0.0660958	0.563911			15.0667	-0.270132	0.0745851	0.129599	-0.0707672	-0.110859	0.0252658	-0.0330171
15.1	0.909276	-0.275695	0.0981526	-0.247294	-0.497252	-0.264469	-0.420525			15.1	-0.266302	0.549955	0.740367	-0.297362	0.00237652	0.0539571	0.452182			15.1	0.485585	0.499674	0.372274	0.0148939	-0.0491213	0.656969	0.379983			15.1	-0.288749	0.241562	0.13831	-0.0286612	-0.106155	0.0937845	-0.187405
15.1333	-0.312996	-0.209584	1.07385	-0.510471	-0.113679	-0.172679	-0.258812			15.1333	0.300978	0.760168	0.598131	-0.0579711	-0.100994	0.181818	0.257817			15.1333	0.489465	0.464088	0.331127	0.195098	0.0540585	0.608707	0.401324			15.1333	-0.332384	0.062949	0.191548	-0.206764	-0.158492	-0.12623	0.0226402
15.1667	0.368632	-0.00475752	0.398962	-0.199247	-0.343154	-0.41544	-0.225121			15.1667	-0.244215	0.502101	0.532426	-0.174679	-0.226291	0.0706866	0.535604			15.1667	0.87969	0.402068	0.300929	0.257524	-0.166782	0.353889	0.246934			15.1667	-0.367583	0.35734	0.0850729	-0.131748	-0.195539	0.076812	-0.230479
15.2	0.976323	0.148017	0.358553	-0.143739	-0.293912	-0.201665	-0.22849			15.2	-0.143256	0.243189	0.551936	-0.193002	-0.351588	0.0432024	0.570365			15.2	0.696988	0.0268952	0.444635	0.0385382	-0.152058	0.227202	0.327781			15.2	-0.297767	0.353267	0.227846	-0.0727031	-0.260225	0.0196084	-0.333566
15.2333	1.14633	0.0654208	0.477645	-0.0577535	0.088984	-0.0543174	-0.22849			15.2333	0.138968	0.785467	0.722383	-0.15795	-0.0806328	-0.0978031	0.680179			15.2333	1.5562	0.321746	0.413262	-0.166271	-0.218865	-0.0628709	0.34801			15.2333	-0.177625	0.191527	0.281567	-0.0654434	-0.167312	-0.0966849	-0.181114
15.2667	-0.712706	-0.215672	0.178994	-0.227203	-0.503333	-0.254807	-0.241967			15.2667	0.268007	0.409517	0.694697	-0.10338	-0.115612	-0.0177407	0.712731			15.2667	1.46403	0.60643	0.407889	-0.137038	-0.0757362	0.223122	0.386469			15.2667	-0.277113	0.0501495	0.0971724	-0.0814147	-0.116152	0.0912701	0.0129606
15.3	0.563067	-0.0689508	-0.0512334	0.027146	-0.0929245	-0.253599	0.414996			15.3	-0.052612	0.48516	0.850774	-0.0974049	-0.241431	-0.118118	0.748232			15.3	1.76308	0.295312	0.132477	0.0453265	-0.121846	0.323157	0.244475			15.3	-0.189261	0.220035	0.290762	-0.39987	-0.38901	0.203792	-0.0238215
15.3333	0.664648	0.0884047	0.00552695	-0.445413	-0.382748	3.21714e-05	0.270127			15.3333	0.0871119	0.207973	0.263282	-0.204553	-0.127619	0.26905	0.352239			15.3333	1.74116	0.196689	0.360908	0.121811	-0.0769004	0.166536	0.116453			15.3333	-0.212824	0.0204777	0.297054	-0.400354	-0.317855	0.293054	-0.014626
15.3667	0.927091	-0.0547101	-0.0104513	-0.070698	-0.781229	-0.182341	0.667674			15.3667	-0.0338375	0.462368	0.4884	-0.0145541	-0.249262	-0.0500046	0.345857			15.3667	1.76992	0.0980662	0.299559	0.147173	-0.0597526	0.0041341	0.262187			15.3667	-0.0880281	0.148474	0.0540985	-0.0944819	-0.286688	0.171104	-0.0910941
15.4	0.121305	-0.0865084	0.743974	-0.278999	-0.299965	0.0314341	0.138735			15.4	-0.00540587	0.549547	0.455836	-0.112143	-0.275887	-0.182645	0.492242			15.4	1.7174	0.607447	0.337733	0.129622	-0.134902	0.0788743	0.64543			15.4	-0.207879	0.256689	0.299474	-0.254678	-0.113799	0.228936	-0.304527
15.4333	-0.0427153	0.243004	1.08128	-0.566859	-0.367898	-0.0712262	0.0376636			15.4333	-0.25419	0.575054	0.500851	-0.212121	-0.206452	0.0527621	0.175427			15.4333	1.2183	0.227191	0.505631	0.00341097	-0.185848	0.0221203	0.209155			15.4333	-0.225042	0.145565	0.2685	-0.145299	-0.173193	0.0642398	-0.107549
15.4667	0.927883	0.0889129	0.973356	-0.0497595	-0.186868	-0.0845116	-0.312716			15.4667	0.142897	0.41487	0.579424	-0.0328768	-0.256049	0.00376873	0.173891			15.4667	0.472807	0.261759	0.162007	-0.237141	-0.203522	-0.0381406	0.405186			15.4667	-0.194207	0.120547	0.177028	-0.0107542	-0.239055	0.115157	-0.244998
15.5	1.56897	-0.0270284	0.821814	-0.243451	-0.0897984	0.189652	0.064616			15.5	0.0945486	0.41583	0.299937	0.011735	-0.234122	0.0682967	0.390581			15.5	1.12258	0.711153	0.433509	0.147306	-0.188621	-0.190976	0.29544			15.5	-0.357111	0.249125	0.0298997	-0.0523761	-0.191423	0.287397	-0.234835
15.5333	2.21807	0.0717287	1.01535	-0.419335	-0.0491747	-0.13403	0.0174495			15.5333	0.0489763	0.240082	0.388292	-0.306125	-0.0576617	0.0216931	0.183056			15.5333	1.18079	0.6532	0.215877	0.0112497	0.0436172	0.0274456	0.461545			15.5333	-0.271295	0.167091	-0.0107542	-0.290492	-0.268458	-0.00553612	-0.237739
15.5667	0.690349	-0.194989	1.12699	0.00320737	-0.0811222	-0.0579407	-0.383466			15.5667	0.0262974	0.257278	0.382544	-0.102981	-0.334881	-0.0189356	0.326864			15.5667	1.14266	0.781308	0.408054	-0.0576139	-0.217454	0.248059	0.021561			15.5667	-0.264605	0.0786577	0.0681338	-0.175306	-0.182602	0.28614	-0.370832
15.6	0.373756	0.0941555	0.862105	-0.388821	-0.3298	0.129263	0.206116			15.6	-0.118457	0.450323	0.40158	-0.278641	-0.189224	-0.0105709	0.0997711			15.6	1.05364	0.949068	0.278724	-0.0279141	-0.0468618	0.0524566	0.0500176			15.6	-0.134281	0.247962	0.337224	-0.303075	-0.0520534	0.0334378	-0.126424
15.6333	1.56698	0.367381	1.28879	-0.0853932	-0.286036	-0.385246	-0.0869907			15.6333	0.136777	0.167436	0.391138	-0.165916	-0.24874	-0.0201305	0.17352			15.6333	1.9878	0.748772	0.0707793	-0.0835263	-0.0735293	-0.0187107	0.0524589			15.6333	-0.133699	0.31196	0.254948	0.0415152	-0.130265	0.22705	-0.0305972
15.6667	1.1468	0.599755	0.988522	-0.0843451	-0.348117	-0.121952	-0.235228			15.6667	-0.0631156	0.58057	0.347911	-0.242394	-0.422067	-0.238809	0.288856			15.6667	2.28697	0.509841	0.263627	-0.0182922	-0.223398	0.46833	-0.0162266			15.6667	-0.236096	0.0990206	0.0550665	-0.148687	-0.194363	-0.0533107	-0.25371
15.7	-0.520162	0.0298769	0.939599	-0.571113	-0.104056	-0.235483	0.0241875			15.7	-0.0623013	0.305911	0.315912	-0.261115	-0.0440878	-0.0679291	0.302212			15.7	2.57327	0.776224	0.452127	-0.0618194	-0.155085	-0.0934609	0.344434			15.7	-0.327148	0.0623673	0.292698	-0.135136	-0.16202	0.17739	-0.0915781
15.7333	-0.469535	0.234737	1.29771	-0.113911	-0.524793	-0.0965893	0.0444018			15.7333	0.0159717	0.445706	0.158884	-0.143212	-0.313476	-0.0679291	0.255205			15.7333	3.35204	0.652183	0.371904	0.010891	-0.156768	0.0354606	0.0729461			15.7333	-0.245114	0.702929	0.486289	-0.0610876	0.11319	0.194362	-0.264357
15.7667	0.330137	0.26648	0.851517	0.320943	-0.573825	-0.0543174	0.563234			15.7667	-0.323354	0.570783	0.550307	-0.268284	-0.199143	0.10773	0.260186			15.7667	4.19227	0.394951	0.454355	-0.0695923	-0.0340521	0.232461	0.389654			15.7667	-0.400746	0.071676	0.182352	-0.169498	-0.568955	0.0566964	-0.0499562
15.8	0.87967	0.222326	0.281826	-0.134823	-0.247325	-0.0760572	-0.00276479			15.8	-0.0448632	0.618317	0.224186	-0.0993965	0.00446473	0.159114	0.41599			15.8	1.18534	0.266843	0.300072	-0.157966	0.0639807	0.183345	0.141286			15.8	-0.358856	-0.00395799	-0.0412446	-0.172402	0.0085164	0.0384667	-0.257098
15.8333	1.5928	0.0460005	1.20849	-0.328782	-0.480769	-0.0808883	0.15558			15.8333	-0.0737809	0.442424	0.388629	-0.243589	-0.142237	0.0682967	0.43448			15.8333	0.791554	0.644049	0.371173	0.186963	0.0856963	0.735925	0.69414			15.8333	-0.325403	0.0379317	0.0545825	-0.17337	-0.269634	0.0944131	-0.214992
15.8667	2.32673	0.260537	0.685883	-0.152695	-0.409787	-0.497568	-0.531704			15.8667	0.141491	0.47836	0.519669	-0.132457	-0.0143298	0.234397	0.393553			15.8667	1.02488	0.573895	0.413075	-0.171922	-0.0387032	0.0501075	0.450983			15.8667	-0.190716	0.136256	0.123307	-0.13804	-0.220238	0.138416	-0.013658
15.9	0.56508	-0.0141559	0.812913	0.0808273	-0.320177	-0.00962994	0.216223			15.9	-0.22583	0.509319	0.611271	-0.0523947	-0.0759342	-0.00698597	0.332661			15.9	1.22071	0.327847	0.123203	-0.0475368	-0.10046	0.22548	0.46729			15.9	-0.275659	-0.285549	0.00666894	-0.141428	-0.252581	0.0447528	-0.139008
15.9333	0.723412	-0.0803759	0.664697	-0.0595557	-0.31833	-0.183549	-0.151002			15.9333	-0.172537	0.585128	0.339473	0.0256763	-0.00545458	0.175843	0.603792			15.9333	1.84068	0.158053	0.138813	0.0223778	-0.0180567	0.114399	0.102569			15.9333	-0.208752	-0.190716	0.21865	-0.21354	-0.0932174	-0.049539	-0.287588
15.9667	1.51734	0.113357	0.852074	-0.283138	0.0582045	-0.102628	-0.0667765			15.9667	0.186634	0.466943	0.403616	-0.0834636	-0.191834	0.44471	0.529175			15.9667	2.55946	0.340047	0.414647	-0.0552295	-0.275743	0.0963494	0.33067			15.9667	-0.360311	0.225853	0.0236081	-0.0896422	-0.116152	-0.0319379	-0.330662
16	0.00161901	-0.151578	0.918521	-0.0921456	-0.489993	0.137718	0.0107114			16	-0.223799	0.588354	0.352612	-0.165119	-0.23882	0.0181083	0.591765			16	2.70795	0.0716313	0.397569	0.106637	-0.0297876	0.00893585	0.467027			16	-0.384164	0.24738	0.165413	-0.0780267	-0.153787	0.160417	-0.25613
16.0333	1.35196	0.494405	0.917676	-0.456937	-0.335934	-0.102628	0.152211			16.0333	0.201092	0.733689	0.226939	-0.0288936	-0.188702	0.0850261	0.59148			16.0333	2.11801	0.259726	0.215329	-0.0945464	-0.0528088	0.18585	0.436248			16.0333	-0.218642	-0.0569018	0.11508	-0.165626	-0.0949815	0.202534	-0.211604
16.0667	1.03304	0.0296254	0.360444	-0.11915	-0.133071	0.131679	0.36446			16.0667	0.00683141	0.489856	0.226734	0.0376259	-0.273277	0.0348377	0.422103			16.0667	1.16536	0.145852	0.190523	-0.33011	-0.252165	-0.11204	0.34066			16.0667	-0.303003	0.000696487	0.0323196	-0.0818986	-0.134969	0.271682	-0.32437
16.1	1.49025	-0.234053	0.071633	-0.351421	-0.43869	-0.111083	0.485746			16.1	-0.0398571	0.324633	0.213003	-0.185832	-0.000233847	-0.035665	0.480743			16.1	1.67511	0.170254	0.293262	-0.0669562	-0.137423	-0.0769526	0.375999			16.1	-0.241623	0.0187322	0.191064	-0.00978618	-0.222002	0.0918987	-0.0722191
16.1333	-0.14207	-0.137908	0.426583	-0.4449	-0.521269	-0.0700184	0.199378			16.1333	0.391392	0.162346	0.312016	-0.279836	-0.0221609	0.196158	0.414874			16.1333	1.43311	0.0960328	0.498033	0.0649447	-0.053962	-0.161039	0.281919			16.1333	-0.240751	0.302651	0.10056	-0.0165618	-0.181426	0.642563	-0.241611
16.1667	-0.45724	0.122144	0.984682	-0.398352	-0.219141	-0.160601	0.0545089			16.1667	-0.0948244	0.723523	0.136924	-0.339186	-0.31191	0.0527621	0.447225			16.1667	1.48224	0.146869	0.124725	0.143099	-0.238352	-0.0108442	0.267033			16.1667	-0.319875	0.156037	0.103464	-0.129328	-0.36784	-0.0181084	-0.144815
16.2	0.509543	0.035106	0.619179	-0.373238	-0.284455	-0.402155	-0.0768836			16.2	-0.193349	0.238904	0.35954	-0.251157	-0.20854	-0.0786838	0.480682			16.2	1.18448	0.236341	-0.0371833	0.0672468	-0.0437751	0.304847	0.314279			16.2	-0.278277	0.08913	0.0507107	-0.144331	0.000871626	0.157903	-0.0460844
16.2333	0.29212	0.246466	0.635293	-0.168575	-0.3507	-0.272923	-0.0566694			16.2333	-0.219962	0.48506	0.117559	-0.0129609	-0.228379	-0.0500046	0.322041			16.2333	1.83396	-0.0290247	0.024582	-0.104455	-0.172928	-0.0986622	0.46745			16.2333	-0.233478	0.254943	0.324641	-0.159335	-0.229646	0.3314	-0.155463
16.2667	0.19116	0.215834	1.2101	-0.14527	-0.102955	-0.233067	-0.285764			16.2667	0.10685	0.531951	0.242786	-0.177467	-0.184003	-0.107363	0.298892			16.2667	1.38314	0.427486	0.22266	-0.281931	-0.334409	-0.156933	0.111732			16.2667	-0.207006	0.279961	0.194451	-0.314691	-0.100274	0.208192	-0.0760909
16.3	0.182626	-0.0343965	0.298096	-0.154154	0.025276	-0.030162	-0.427264			16.3	0.122278	0.288267	0.305993	0.0189049	-0.265968	0.0862211	0.27941			16.3	0.779385	0.207873	0.241977	-0.0754684	-0.270727	0.401336	0.183284			16.3	-0.312603	0.273561	0.275759	-0.247902	-0.0596982	0.148474	-0.111905
16.3333	0.0571456	0.492148	0.608889	-0.0563402	-0.188696	-0.143692	0.185901			16.3333	0.0867275	0.406262	0.235598	-0.234826	-0.323918	-0.0966081	0.3233			16.3333	0.362519	0.233291	0.384063	-0.126067	-0.181715	-0.248049	0.027844			16.3333	-0.201188	0.397484	0.288343	-0.20628	-0.216121	0.26791	-0.2208
16.3667	0.349522	-0.242122	-0.245837	-0.0867005	-0.215209	-0.16664	0.067985			16.3667	-0.0651822	0.788258	0.443282	-0.174679	-0.254483	0.168674	0.415254			16.3667	0.120871	0.261759	0.335728	-0.30799	-0.261142	0.438183	0.397365			16.3667	-0.238424	0.17	0.330448	-0.150139	-0.321383	0.174875	-0.28662
16.4	-0.183285	-0.0958056	0.435938	-0.440955	-0.156314	0.17999	-0.262181			16.4	0.0925937	0.389719	0.500857	-0.172687	-0.376125	-0.250758	0.199515			16.4	0.498045	0.0645142	0.313263	0.012617	-0.33013	0.158377	0.191891			16.4	-0.166571	0.364322	0.147506	-0.0857704	-0.207888	-0.0237659	-0.0804466
16.4333	0.353599	0.128785	0.306374	-0.227789	-0.263703	-0.0289543	0.367829			16.4333	-0.113243	0.472394	0.268125	-0.152772	-0.16573	-0.100193	0.588568			16.4333	0.452295	0.203806	0.517501	-0.137462	-0.142099	0.0162954	0.0225382			16.4333	-0.256168	0.447519	0.260756	-0.0247895	-0.147318	0.0736689	-0.196117
16.4667	-0.196328	-0.0846375	-0.290403	-0.373445	-0.0171611	-0.105044	0.283603			16.4667	0.108613	0.527004	0.56332	-0.161933	-0.12031	-0.071514	0.525198			16.4667	0.808355	0.516958	0.202801	0.136753	-0.024718	0.0852854	0.22068			16.4667	-0.289913	0.271234	0.0298997	-0.0770588	-0.189659	0.371002	-0.00591446
16.5	0.28685	0.146769	0.360052	-0.320481	-0.0214796	-0.00721446	-0.208276			16.5	-0.178007	0.731669	0.267825	-0.196985	-0.224202	-0.103778	0.0988566			16.5	0.923037	0.0563803	0.131543	0.200444	-0.0506246	0.120862	-0.0070723			16.5	-0.3958	0.0158232	0.161057	-0.0756069	-0.254933	0.343972	-0.196601
16.5333	0.60639	-0.0681456	0.272151	-0.024311	-0.411788	0.0266031	-0.0970978			16.5333	0.0834488	0.370966	0.299216	-0.142017	-0.0466982	-0.0679291	0.0688252			16.5333	0.509306	0.334964	0.206902	0.0220671	-0.0387884	-0.0964731	-0.0655195			16.5333	-0.236678	0.196763	0.203647	-0.073187	-0.326676	-0.114286	-0.237255
16.5667	-0.253756	0.253232	0.421371	-0.265209	-0.226885	-0.387661	-0.238597			16.5667	0.21768	0.424458	0.30361	-0.203358	-0.234644	0.0527621	0.218454			16.5667	0.956181	0.0614641	0.29984	-0.147085	-0.168802	0.298117	0.58081			16.5667	-0.316385	-0.0121032	0.0962044	-0.127392	-0.0755757	0.0409811	-0.228543
16.6	-0.342826	0.423966	0.180444	0.0464848	-0.256095	-0.173886	0.135366			16.6	0.250464	0.450581	0.597126	-0.167111	-0.106214	-0.294972	0.185922			16.6	0.497489	0.176354	0.397828	-0.100628	-0.155225	0.457689	0.449288			16.6	-0.312603	-0.19188	-0.0335011	-0.128844	-0.247876	0.0491531	-0.309851
16.6333	-0.281901	0.289881	0.425886	-0.268197	-0.149455	-0.153354	-0.0634074			16.6333	-0.190053	0.548654	0.247737	-0.138432	-0.191834	0.0886111	0.0600408			16.6333	0.198591	0.295312	0.359186	-0.0403274	0.0114223	0.273727	0.532745			16.6333	-0.30184	0.260761	0.188644	-0.351957	-0.0920413	0.22265	-0.275005
16.6667	0.524175	-0.0959802	0.55496	-0.23263	-0.381478	0.0833682	-0.241967			16.6667	-0.0892666	0.819231	0.515432	0.0252779	-0.123965	-0.351135	0.142201			16.6667	0.0181051	0.415285	0.327191	0.0416249	-0.0327108	0.188568	0.171163			16.6667	-0.163953	0.201417	0.100076	-0.201925	-0.0514654	0.324485	-0.256614
16.7	-0.583634	-0.235505	0.300756	-0.353186	-0.349245	-0.00117557	-0.211645			16.7	-0.211345	0.539882	0.636578	0.0157183	-0.192878	-0.0559795	0.353081			16.7	0.526276	0.10925	0.502193	-0.29544	-0.0188657	0.14258	0.504143			16.7	-0.394637	0.225271	-0.123521	-0.0765748	-0.0767518	-0.00805055	-0.0707672
16.7333	-0.628538	0.0339359	0.00766901	-0.405184	-0.33156	-0.227028	0.43521			16.7333	-0.0478172	0.287579	0.434539	-0.315286	0.0164724	0.0551521	0.078185			16.7333	0.205948	0.0950161	0.395444	-0.288602	-0.211899	0.418979	0.270523			16.7333	-0.282058	0.121129	-0.0848025	-0.0717351	-0.205536	0.0548105	-0.0973858
16.7667	-0.24901	-0.025888	0.0357161	-0.462202	-0.510095	0.102693	0.357722			16.7667	-0.326996	0.537533	0.5245	-0.0468181	-0.0399113	-0.069124	0.0876751			16.7667	0.310692	0.399018	0.578138	-0.104547	0.00913007	0.204273	0.0969447			16.7667	-0.209624	0.283451	0.236073	-0.111905	-0.129677	0.0742976	-0.146751
16.8	-0.214818	-0.0483881	-0.0916895	-0.225954	-0.274928	0.137718	-0.238597			16.8	-0.272828	0.42925	0.328608	-0.136839	-0.0936846	-0.241199	0.210577			16.8	0.245934	0.170254	-0.0564755	-0.0650341	-0.0775686	-0.0106014	0.0936263			16.8	-0.211952	0.113566	0.159605	-0.0562479	-0.0632265	-0.00365027	-0.109485
16.8333	-0.113381	0.328331	0.601271	-0.196972	-0.250015	-0.413025	0.347615			16.8333	0.0432662	0.527507	0.499668	-0.140822	-0.144847	0.145969	0.14635			16.8333	0.693499	0.296328	0.23179	-0.243578	0.0650845	-0.0401247	0.207675			16.8333	-0.4086	0.0507312	0.13589	-0.161271	-0.223178	-0.13503	-0.184501
16.8667	-0.0236355	-0.23066	0.915611	-0.552897	-0.195417	-0.205288	-0.319454			16.8667	-0.13471	0.371458	0.494356	-0.19101	-0.274321	0.0730766	-0.00295478			16.8667	0.747081	0.173304	0.45169	0.0150265	-0.205965	0.286319	0.34824			16.8667	-0.319003	0.25378	0.138794	-0.356313	-0.285512	0.0384667	-0.0112382
16.9	-0.30717	-0.0795066	0.808277	-0.109842	-0.251726	-0.107459	-0.285764			16.9	-0.0754102	0.674745	0.492248	0.0376259	-0.213761	0.100561	1.0188			16.9	0.502571	0.166187	0.259041	-0.0056268	-0.0506145	0.169438	0.226568			16.9	-0.239005	-0.0155939	0.325125	0.131051	-0.344905	-0.00993639	-0.210152
16.9333	-0.366149	0.0597718	0.598397	-0.281824	-0.0323841	0.00969434	-0.0701455			16.9333	-0.0821039	0.428266	0.316638	-0.168306	0.0263918	0.0324478	0.460599			16.9333	0.354584	0.32073	0.131828	0.0496873	-0.187497	-0.067702	0.194396			16.9333	-0.227078	0.144983	0.0971724	-0.0988377	-0.115563	0.149102	0.00666894
16.9667	-0.764305	0.23814	0.276597	-0.461457	-0.0339512	-0.175094	-0.413787			16.9667	0.118345	0.27125	0.4079	-0.119711	-0.216893	-0.0810736	0.36697			16.9667	0.822744	0.202789	0.0931494	-0.107128	-0.146086	-0.0175363	0.30535			16.9667	-0.269259	-0.0377024	0.279631	-0.156915	-0.284924	-0.0243945	-0.130296
17	-0.445097	-0.0498678	0.670112	-0.467445	0.0220413	-0.190795	-0.0431932			17	0.141417	0.247955	0.624119	-0.307718	-0.208018	0.166284	0.20134			17	1.25653	0.223124	0.137017	-0.13481	-0.140667	0.308462	0.731621			17	-0.281186	0.170582	0.21381	-0.126908	-0.0679309	0.188076	-0.139008
17.0333	-0.446182	0.318894	0.603498	-0.250124	-0.190571	-0.313988	0.509329			17.0333	-0.156828	0.234235	0.382669	-0.331618	-0.142237	-0.179061	0.406934			17.0333	1.03669	0.405118	0.354042	-0.136119	-0.089851	-0.205851	0.177901			17.0333	-0.161626	0.0518948	0.139762	-0.0165618	-0.202596	0.131501	-0.114325
17.0667	-0.111184	0.294729	0.769337	-0.0326324	-0.0607794	-0.198042	0.0275566			17.0667	-0.143204	0.481989	0.381859	-0.182247	-0.199665	-0.113338	0.309399			17.0667	1.0514	0.384784	0.494009	0.0697328	-0.169528	-0.157269	0.085163			17.0667	-0.290204	0.198509	0.0749095	-0.153527	-0.238467	0.117672	-0.0252734
17.1	-0.178698	0.293159	0.41432	-0.274831	-0.0834404	0.409466	0.152211			17.1	-0.217412	0.533932	0.167415	-0.0930233	-0.356808	-0.0511996	0.34084			17.1	0.863222	0.281077	0.185438	-0.0673051	-0.0632002	-0.193127	0.0973485			17.1	-0.285258	0.00942349	0.104916	-0.185469	-0.247288	0.129615	-0.183533
17.1333	0.825801	0.256823	0.863931	-0.20795	-0.38385	-0.208912	-0.346407			17.1333	-0.144993	0.640421	0.361446	0.0340411	-0.135972	0.12207	0.130933			17.1333	1.06078	0.0319789	0.0333864	-0.0454306	-0.318065	-0.0194908	0.37514			17.1333	-0.189261	0.0489859	0.175576	-0.135136	-0.111447	0.164189	-0.266293
17.1667	-0.334791	0.274218	0.551716	-0.463855	-0.20084	-0.0663951	-0.312716			17.1667	0.0493376	0.480776	0.249188	-0.15078	-0.3093	0.0527621	0.108636			17.1667	1.40969	-0.0554597	0.354607	0.0709241	-0.0173578	-0.119513	0.196758			17.1667	-0.235224	0.239816	0.195419	-0.144331	-0.174369	0.287397	-0.181597
17.2	0.00565338	-0.0788078	0.947873	-0.27181	-0.111894	-0.184756	-0.117312			17.2	-0.0363865	0.148368	0.481023	-0.0906335	-0.100994	-0.134847	0.236655			17.2	0.678781	0.247525	0.499638	-0.285224	-0.0627783	-0.36751	0.124693			17.2	-0.291367	0.371885	0.026028	-0.149171	-0.272574	0.282368	-0.216928
17.2333	-0.283825	0.420957	0.42004	-0.355248	-0.359513	-0.400947	0.499222			17.2333	0.0204554	0.528621	0.195619	-0.0974049	-0.175128	0.120875	0.255463			17.2333	1.23615	0.374616	0.189838	-0.177264	-0.0174943	0.183987	0.197187			17.2333	-0.252678	-0.062138	0.311574	-0.0567319	0.00734029	-0.0419957	-0.0359209
17.2667	-0.0872293	-0.244883	0.11848	-0.289756	-0.552733	-0.0977971	0.337508			17.2667	-0.251685	0.363649	0.12281	-0.189019	-0.289461	0.0503723	0.23088			17.2667	0.873824	0.175338	0.414471	-0.191593	-0.0188192	0.0261165	0.512771			17.2667	-0.205843	0.261343	0.179448	-0.0630235	-0.0432326	0.106985	-0.101258
17.3	0.390995	0.317581	-0.174829	-0.637479	-0.405489	-0.108667	-0.26555			17.3	-0.305116	0.460523	0.309933	-0.132457	-0.16312	-0.261513	0.0308673			17.3	0.963235	-0.0818946	0.426171	0.0644383	-0.0887923	0.0954211	0.116963			17.3	-0.156099	0.272397	0.441279	-0.0315652	-0.280219	0.174875	-0.232899
17.3333	-0.224255	0.377192	0.248895	-0.200291	-0.591843	-0.235483	0.33077			17.3333	-0.258864	0.215113	0.306143	-0.169899	-0.241953	-0.268683	0.188091			17.3333	1.16849	0.065531	0.149041	-0.0463832	-0.293785	0.0633921	0.121949			17.3333	-0.33413	0.204327	0.0236081	-0.270649	-0.150847	0.161675	-0.275489
17.3667	0.0900225	0.287693	0.192807	-0.370212	-0.252414	-0.173886	0.357722			17.3667	0.200639	0.367285	0.175121	-0.180256	-0.188702	-0.0631493	0.24133			17.3667	1.21886	-0.0808779	0.379749	-0.250574	0.0908191	0.240834	0.494612			17.3667	-0.169771	0.282288	0.229782	-0.0315652	-0.03794	0.201277	-0.224671
17.4	-0.124506	0.114839	0.64902	-0.541634	-0.346029	0.00244771	-0.0634075			17.4	0.161925	0.534259	0.215534	-0.233232	-0.192356	-0.164721	0.182643			17.4	0.886436	0.171271	0.211982	-0.0398824	0.0729855	0.338801	0.582936			17.4	-0.23406	0.174073	0.387558	-0.104645	0.0579131	0.159789	-0.225155
17.4333	0.547915	0.238778	0.389796	-0.351253	-0.345081	-0.0748495	0.398151			17.4333	-0.140558	0.304827	0.154632	-0.0296904	-0.370382	-0.0966081	0.208339			17.4333	1.35504	0.596263	0.673357	0.152802	-0.290781	-0.171794	0.490956			17.4333	-0.381255	0.0745851	0.287859	-0.167562	0.00263584	0.137787	-0.226123
17.4667	-0.802671	-0.0253003	1.17107	-0.0810245	-0.205045	0.048343	-0.0533004			17.4667	-0.0206991	0.0313724	0.362917	-0.203757	-0.156855	-0.273463	0.671169			17.4667	0.586728	0.240408	0.532907	-0.29582	-0.0981349	0.606615	0.271735			17.4667	-0.27275	0.424829	0.155249	-0.172402	-0.450167	0.0925273	0.0318356
17.5	-0.105721	0.0450157	0.869986	-0.152312	-0.358383	-0.316403	-0.282395			17.5	-0.0389625	0.355508	0.660847	-0.168306	-0.118222	-0.126482	0.629574			17.5	0.149039	0.383767	0.255285	0.135142	0.245971	0.326903	0.311235			17.5	-0.338493	0.336395	0.167833	-0.20628	-0.114387	0.267281	-0.196117
17.5333	-0.543712	0.047821	0.55174	-0.337786	-0.373222	-0.195626	-0.188062			17.5333	-0.0837174	0.674916	0.53743	-0.15795	-0.130752	-0.19101	0.393254			17.5333	0.477324	0.31768	0.546084	-0.0895656	-0.0859987	0.811928	0.380662			17.5333	-0.325112	0.119384	0.251561	0.00618494	-0.179662	0.13213	-0.242094
17.5667	-0.648795	-0.0296816	0.883428	-0.250476	-0.562913	0.0435119	-0.0768836			17.5667	-0.00953962	0.664806	0.683062	-0.19101	-0.140149	-0.165916	0.695641			17.5667	2.81054	0.436637	0.205755	-0.0228509	-0.191881	0.377847	0.235199			17.5667	-0.150863	0.389921	0.230266	0.0110247	-0.314914	0.310027	-0.0335011
17.6	-0.38147	0.515715	0.553754	-0.362495	-0.357624	0.0555895	-0.312716			17.6	-0.0737919	0.524734	0.816839	-0.120906	-0.189746	-0.0583693	0.473714			17.6	3.75662	0.225157	0.238192	-0.00621906	-0.0493987	0.270743	0.432427			17.6	-0.314639	-0.00803052	0.113628	-0.171918	-0.314914	0.121443	-0.154495
17.6333	-0.264117	0.543743	1.2558	-0.385508	-0.521585	-0.306741	-0.164479			17.6333	0.201791	0.468505	0.681829	0.0372276	0.00968547	-0.158746	0.777875			17.6333	2.87735	0.350215	0.195533	-0.266754	0.0598763	-0.00736036	0.236127			17.6333	-0.354783	0.0850575	0.0628101	-0.0567319	-0.349022	0.213849	-0.169014
17.6667	-0.611173	0.555028	1.04059	-0.148018	-0.178785	-0.316403	0.0477708			17.6667	0.0750012	0.437437	0.578112	-0.367068	-0.256049	-0.219689	0.275007			17.6667	1.27143	0.26786	0.664526	0.107819	-0.111596	0.560904	0.261784			17.6667	-0.225042	0.172909	0.0957204	-0.0388247	-0.2861	0.160417	-0.252258
17.7	-0.48232	-0.00477846	1.3554	-0.197206	-0.394238	-0.0217076	0.128628			17.7	0.160681	0.296144	0.363129	-0.000214565	-0.0513968	-0.0774888	0.379705			17.7	2.80954	0.0441796	0.416421	-0.211703	-0.0291759	0.177892	0.260808			17.7	-0.235224	0.38643	0.101528	-0.114809	-0.157315	0.278596	-0.182565
17.7333	0.02909	0.544886	0.808355	-0.247476	-0.610029	-0.189587	0.105044			17.7333	-0.0976664	0.43786	0.40574	-0.249962	-0.188179	0.0503722	0.342091			17.7333	2.76438	-0.0666437	0.369836	0.019309	0.00888058	0.00068069	0.392619			17.7333	-0.187516	-0.0144303	0.0347396	-0.266777	-0.0438206	0.119558	-0.334534
17.7667	-0.725483	0.38534	0.873042	-0.208974	-0.362444	-0.249976	-0.0768836			17.7667	-0.102988	0.47863	0.693537	-0.118118	-0.0722797	0.183013	0.51273			17.7667	2.73185	0.411218	0.210782	-0.191005	-0.0973581	0.0753512	0.145874			17.7667	-0.103446	0.163601	0.084105	-0.216928	-0.354314	0.233965	-0.305011
17.8	-0.580949	0.307852	0.329771	-0.458373	-0.406491	-0.240314	0.43521			17.8	0.725592	0.44597	0.452711	0.0384226	-0.377169	-0.00459602	0.362033			17.8	1.58289	0.479339	0.581481	-0.126732	-0.0655827	0.581056	0.495858			17.8	-0.129045	-0.0987914	-0.0543119	-0.204344	-0.247288	0.215107	0.0289318
17.8333	0.828432	0.262783	0.676715	-0.238451	-0.436086	-0.455296	0.209485			17.8333	-0.295546	0.52974	0.345116	-0.019334	-0.0999495	-0.0523945	0.360151			17.8333	2.14486	0.692852	0.667826	0.00378845	-0.129289	-0.155085	0.363147			17.8333	-0.245114	-0.012685	0.024576	-0.0935139	-0.182602	0.37666	-0.177726
17.8667	-0.453636	-0.116058	0.861061	-0.153187	-0.00558989	-0.0313698	0.152211			17.8667	-0.23102	0.471338	0.251155	-0.0284954	-0.184003	0.0216931	0.250749			17.8667	2.25738	0.0563804	0.223645	-0.0853395	-0.029679	0.215811	0.170141			17.8667	-0.312894	0.0757487	0.181384	-0.101742	-0.317855	-0.0652543	-0.194665
17.9	0.251153	0.412979	1.00799	-0.413901	-0.236713	-0.0543174	-0.430633			17.9	-0.153314	0.212871	0.526062	-0.226062	-0.0320802	0.12685	0.0092589			17.9	1.79485	0.149919	0.325242	-0.0637847	-0.0381843	0.0687675	0.195919			17.9	-0.258496	0.156037	0.223006	-0.0194658	-0.213769	-0.204178	-0.266777
17.9333	0.125293	0.108863	0.56672	-0.313207	-0.590214	-0.45892	-0.110574			17.9333	0.00352094	0.499469	0.31878	-0.132855	-0.0989053	-0.0882434	0.262126			17.9333	1.70178	0.235324	0.113119	-0.174582	-0.283626	-0.0285226	0.30788			17.9333	-0.198279	0.385848	0.144602	0.0240921	-0.0920413	0.180533	-0.283716
17.9667	0.141338	0.285901	0.30747	-0.053326	-0.437179	-0.196834	0.111783			17.9667	0.0486011	0.598399	0.197665	-0.328431	-0.0769783	0.0324478	0.565136			17.9667	1.235	0.392917	0.436252	-0.0855395	-0.300052	-0.134581	0.153208			17.9667	-0.336457	0.216544	0.0845889	-0.187405	-0.336085	0.166075	-0.0804466
18	-0.0448499	0.126469	0.0695419	-0.313874	-0.284732	-0.119537	-0.0903598			18	0.200411	0.351386	0.281822	0.0639151	-0.275887	0.0754664	0.227875			18	1.17712	0.396984	0.174841	0.0987396	-0.051627	-0.120392	0.215706			18	-0.283513	-0.000467107	0.0308677	-0.265809	-0.334908	0.181162	-0.283232
18.0333	-0.23305	-0.0730143	0.986647	-0.395493	-0.378236	-0.320026	0.286973			18.0333	0.164993	0.230453	0.351845	-0.166713	-0.0503527	-0.0954133	0.361506			18.0333	1.17514	0.0807818	0.238219	-0.132027	-0.156918	0.0784045	0.0490076			18.0333	-0.325984	0.121129	0.104432	-0.0988377	-0.414884	-0.0256517	-0.177726
18.0667	0.804433	0.127836	0.498591	-0.0654951	-0.380524	-0.061564	0.111783			18.0667	0.397452	0.325127	0.421015	-0.031682	-0.197577	0.0121334	0.363054			18.0667	0.724357	0.184488	0.262869	-0.240309	-0.171037	-0.0124409	0.276092			18.0667	-0.285258	0.406211	0.0274799	-0.0872223	-0.184954	-0.0419957	-0.24645
18.1	0.0690579	0.00134369	0.885401	-0.330902	-0.266697	-0.108667	0.138735			18.1	0.103321	0.464083	0.275993	-0.298159	-0.154767	-0.00220616	0.34128			18.1	0.397275	0.187538	0.466848	-0.0610492	-0.0191485	-0.0730939	0.176309			18.1	-0.245987	0.219453	0.169769	-0.204344	-0.334908	-0.0319379	-0.0325331
18.1333	-0.0863137	-0.0152956	0.593654	-0.363553	-0.27146	0.101485	0.162318			18.1333	-0.100131	0.536117	0.402849	-0.10338	-0.0660148	-0.230444	0.221377			18.1333	0.75407	0.176354	0.140641	-0.127535	-0.192055	-0.262417	0.101285			18.1333	-0.220679	0.174655	0.11024	-0.212088	-0.218473	-0.132516	-0.190309
18.1667	-0.404317	-0.00685886	0.906695	-0.0324514	-0.186505	-0.192003	-0.0869907			18.1667	-0.0585515	0.355326	0.318323	-0.0527929	-0.196011	-0.266293	0.300622			18.1667	0.835436	0.3797	0.332972	-0.171097	-0.0475934	-0.234744	0.00417147			18.1667	-0.316676	0.08913	0.083621	-0.0591518	-0.185542	-0.0740549	-0.321466
18.2	-0.715805	-0.245932	0.217657	-0.332652	-0.51387	-0.0325776	0.00734235			18.2	0.397483	0.624711	0.372977	0.0276679	-0.0242491	-0.038055	0.424073			18.2	0.560072	0.187538	0.174985	-0.22115	-0.127906	0.00871865	0.207197			18.2	-0.377474	0.197927	0.110724	-0.240158	-0.130853	0.135273	-0.220316
18.2333	1.12627	-0.0130453	0.841361	-0.515329	-0.485541	-0.210119	0.185901			18.2333	-0.020922	0.522303	0.31137	-0.0818703	-0.0910743	0.00376873	0.266876			18.2333	0.454175	0.039096	0.425851	-0.0384605	-0.0726831	0.053042	0.234464			18.2333	-0.222715	-0.0470112	0.256884	-0.247418	-0.213181	0.219507	-0.0615716
18.2667	-0.754034	-0.251249	0.705981	-0.218128	-0.601414	-0.376792	0.0881993			18.2667	0.171291	0.459177	0.223754	-0.0500047	-0.148502	0.0372276	0.153287			18.2667	0.672975	0.188555	0.0332212	0.0270038	-0.116067	0.328974	0.0909849			18.2667	-0.210497	-0.0667924	0.0463549	-0.172886	-0.0749876	-0.0237659	-0.0272093
18.3	0.0812269	0.434199	2.18208	-0.234645	-0.198442	-0.270508	-0.00276479			18.3	-0.278005	0.529056	0.372835	-0.265496	-0.319741	-0.03925	0.291399			18.3	0.0855843	0.315646	0.190997	-0.043653	0.0300421	0.189393	0.261744			18.3	-0.280604	0.333486	0.278663	-0.159335	-0.300801	0.400547	-0.102225
18.3333	0.561232	0.457434	2.0964	-0.0923829	-0.192693	-0.231859	0.40152			18.3333	0.23747	0.182556	0.313742	-0.198977	-0.297814	0.0551521	0.26896			18.3333	-0.105256	0.160087	0.46054	0.14572	-0.0260679	0.557276	0.393555			18.3333	-0.173844	0.00942349	0.315929	-0.121101	0.0420355	0.14093	-0.0368889
18.3667	0.109266	-0.116825	1.02448	-0.348968	-0.117127	-0.173886	-0.0836217			18.3667	0.185696	0.222387	0.170764	-0.318871	-0.346367	0.177038	0.194444			18.3667	0.0935253	0.182455	0.297757	-0.0189832	-0.234603	0.62137	0.417135			18.3667	-0.177043	0.1828	0.479029	-0.141911	-0.0402923	0.333914	-0.195633
18.4	-0.153891	0.14906	0.886875	-0.0600692	-0.0581262	0.341831	-0.0903598			18.4	0.292675	0.230239	0.362077	-0.03925	-0.116656	-0.0954133	0.253441			18.4	0.330181	0.0197782	0.414996	0.0503446	-0.0844834	0.897582	0.472704			18.4	-0.160753	0.022223	0.144118	-0.137556	0.232566	0.220136	-0.109485
18.4333	-0.436522	0.0767392	1.51055	-0.220978	-0.586832	-0.106251	-0.137526			18.4333	-0.0862829	0.551726	0.333655	-0.207341	-0.191834	-0.137237	0.0142125			18.4333	0.489544	0.32378	0.259846	-0.10282	-0.0638621	0.451629	0.461998			18.4333	-0.216024	0.157201	0.0676498	-0.0257574	-0.0497012	0.179276	-0.0364049
18.4667	-0.426558	-0.0846183	3.10753	-0.149277	-0.640126	-0.0833038	0.0511399			18.4667	-0.255294	0.38022	0.491931	-0.163526	-0.161554	-0.284217	0.304594			18.4667	0.146904	0.33293	0.0630725	-0.198692	-0.063475	-0.0217446	0.287169			18.4667	-0.261695	0.435883	0.396269	-0.0460844	-0.0738115	0.170475	0.00812085
18.5	0.653667	0.552049	1.79365	-0.26147	-0.133551	-0.0567329	0.12189			18.5	0.113185	0.0623337	0.126223	-0.13405	-0.0733238	-0.337991	0.25143			18.5	2.11027	0.176354	0.232777	-0.00897675	-0.10631	0.212244	0.195058			18.5	-0.34082	0.21829	0.084105	0.111692	-0.119092	0.0786978	-0.172886
18.5333	0.0183384	0.636676	3.83776	-0.280741	-0.381537	-0.442011	0.196008			18.5333	0.212011	0.263975	0.412094	-0.031682	-0.0007559	-0.248368	0.27138			18.5333	1.11715	0.48544	0.120469	0.108827	-0.186214	0.431111	0.132587			18.5333	-0.21777	0.314869	0.157185	-0.0199498	-0.142614	0.00326443	-0.115293
18.5667	-0.789247	0.253559	4.05678	-0.559299	-0.415788	-0.400947	0.138735			18.5667	-0.354148	0.614292	0.459624	-0.142415	-0.218982	-0.128872	0.251905			18.5667	1.28254	0.347165	0.182623	-0.154558	0.0877171	-0.0812519	0.367982			18.5667	-0.189552	0.237489	0.0991083	-0.209668	-0.159668	0.134016	-0.116745
18.6	-0.619976	-0.0352545	3.36011	-0.212211	-0.440277	0.0519662	0.0140804			18.6	0.0598084	0.531019	0.758775	-0.145602	-0.0874197	0.0420075	0.205899			18.6	1.17328	0.434603	0.351716	-0.0169787	-0.0654465	0.0532128	0.574197			18.6	-0.227369	0.0838939	0.350291	-0.150623	-0.157904	0.418777	-0.0867383
18.6333	0.395989	0.0262145	3.0085	0.0176243	-0.477758	-0.00238337	0.283603			18.6333	-0.00111621	0.295916	0.744115	-0.1934	-0.227335	-0.0535895	0.554457			18.6333	1.40927	0.428503	0.317431	-0.0478585	0.0778819	-0.0513786	0.0337201			18.6333	-0.229115	0.0961117	0.265112	-0.00301053	-0.177309	-0.0526821	-0.173854
18.6667	-0.291331	-0.0575716	2.63219	-0.0220437	-0.37922	-0.285001	0.125259			18.6667	0.263448	0.390647	0.774672	-0.0400467	-0.0247712	-0.109753	0.623979			18.6667	0.852553	0.121451	0.091795	-0.144752	-0.120276	-0.239557	0.25811			18.6667	-0.32773	0.130438	0.162993	-0.233383	-0.372544	0.0736689	-0.149171
18.7	-0.461066	0.142149	3.73065	-0.329767	-0.0861822	-0.153354	-0.022979			18.7	-0.102038	0.477704	0.717921	-0.31449	-0.219504	0.167479	0.439862			18.7	0.91938	-0.0402088	0.0337599	-0.179567	-0.192379	-0.389256	0.0578774			18.7	-0.277113	-0.0976278	0.0908807	-0.034953	-0.253169	0.125844	-0.0789947
18.7333	-0.104639	0.351225	3.1749	-0.294679	-0.343944	-0.0712262	-0.00950284			18.7333	0.333336	0.370777	0.493973	-0.122101	-0.230467	-0.0619543	-0.115458			18.7333	0.686237	0.0441796	0.600401	-0.0698238	-0.186584	-0.135598	0.510897			18.7333	-0.0665015	0.317196	0.0589382	-0.0959339	-0.162608	0.111386	-0.209668
18.7667	-0.327073	0.016898	2.8929	0.0363102	-0.293411	-0.181133	-0.248704			18.7667	-0.180814	0.37893	0.651115	-0.174281	-0.292594	0.116095	0.379243			18.7667	0.492212	0.200756	0.354938	-0.125315	-0.238972	0.192965	0.143005			18.7667	-0.149699	0.0996025	0.0468389	-0.0978698	-0.167901	0.0793264	-0.253226
18.8	0.157861	0.323186	1.58223	-0.491813	-0.112751	-0.223405	-0.154371			18.8	-0.0905912	0.376825	0.558026	-0.276251	-0.138061	0.173454	0.475467			18.8	0.175916	0.10925	0.123745	-0.071182	-0.11521	-0.183265	0.0360541			18.8	-0.326566	0.374212	0.177996	0.00908886	-0.304918	0.119558	-0.313723
18.8333	-0.442626	0.141588	1.9227	-0.197365	-0.527641	-0.146108	0.0881993			18.8333	-0.225503	0.187303	0.361384	-0.272666	-0.0942067	0.0874161	0.710843			18.8333	0.489889	0.315646	0.216899	-0.175765	0.0738682	-0.24173	-0.0160365			18.8333	-0.196825	0.229926	0.10782	-0.254194	-0.0438206	0.422548	-0.149171
18.8667	-0.10247	0.0445608	2.44703	-0.316293	-0.118144	-0.152147	0.0949373			18.8667	0.324548	0.581672	0.603405	0.0678983	-0.0164181	-0.108558	0.656369			18.8667	0.260945	0.120434	0.156484	-0.105654	-0.271491	0.0530106	0.0294667			18.8667	-0.199152	0.267161	0.19058	-0.0151099	-0.261989	0.228936	-0.165626
18.9	-0.0287675	0.0866191	2.20796	-0.177495	-0.359301	-0.173886	-0.0768836			18.9	-0.0644261	0.324102	0.259715	0.0344393	0.0342228	0.0324478	0.747983			18.9	0.264499	0.479339	0.0861231	-0.0475526	0.0304494	0.0801658	0.10774			18.9	-0.288167	0.0885483	-0.0354369	-0.155947	-0.0467609	0.103214	-0.053828
18.9333	-0.427444	0.283257	1.96879	-0.386712	-0.443706	-0.0736417	0.148842			18.9333	0.0485975	0.460532	0.457453	-0.0547845	-0.123965	0.0420075	0.96904			18.9333	0.117072	0.166187	0.263981	-0.254042	-0.243287	-0.107168	0.410293			18.9333	-0.331512	-0.0121032	-0.0751229	-0.118197	-0.175545	0.393004	-0.157399
18.9667	-0.1776	-0.0389639	1.25202	-0.298118	-0.353819	-0.159393	0.620507			18.9667	0.564203	0.487079	0.432525	0.0252779	-0.00388832	-0.0882435	1.18222			18.9667	0.0842224	0.32988	0.151501	-0.146706	-0.323928	-0.00518222	0.167164			18.9667	-0.237551	0.172327	0.131051	-0.0785107	-0.00853726	0.252823	-0.159819
19	-0.14143	0.227631	2.00536	-0.332815	-0.336341	-0.0519018	0.414996			19	0.0643074	0.521245	0.475618	0.0631185	0.227911	-0.0273003	0.752238			19	0.259838	0.261759	0.351007	-0.242725	-0.236835	0.035085	0.232198			19	-0.228824	0.180473	0.119435	-0.000590716	0.0720264	0.306255	-0.193213
19.0333	-0.133935	0.227301	1.69479	-0.222498	-0.403807	-0.16664	0.324032			19.0333	-0.183599	0.253402	0.410413	-0.114533	-0.0879419	-0.0894384	0.52498			19.0333	0.0213306	0.147886	0.328343	-0.129126	-0.107023	-0.0226666	0.0685205			19.0333	-0.229696	-0.177916	0.204615	-0.0393087	-0.153199	-0.038224	-0.034469
19.0667	-0.00412374	-0.0105117	1.05542	-0.112574	-0.121514	-0.182341	0.196008			19.0667	-0.170274	0.507539	0.378788	0.0882127	-0.26649	-0.0846586	0.331737			19.0667	0.0171598	0.1062	0.357601	0.0293913	0.03197	-0.477023	0.184842			19.0667	-0.121191	0.0757487	0.242849	-0.230479	-0.209064	0.192477	-0.20628
19.1	-0.446455	0.41282	1.22797	-0.500797	-0.388358	-0.097797	-0.0701455			19.1	0.0398785	0.366422	0.611451	-0.0579711	0.00864136	0.0503723	0.725696			19.1	0.460474	0.410202	0.344935	-0.0337545	-0.0371892	-0.0589541	0.112881			19.1	-0.302712	0.198509	-0.0180139	-0.0644754	-0.109683	0.206306	-0.16611
19.1333	-0.328637	0.0357631	1.31302	-0.149551	-0.193714	0.148588	0.115152			19.1333	0.537572	0.58594	0.513453	0.102154	-0.20854	-0.0237155	0.719541			19.1333	0.20506	0.298362	0.339938	-0.259572	-0.185775	-0.189698	0.169877			19.1333	-0.202352	0.120547	0.187192	-0.18063	-0.184366	0.0397239	-0.113841
19.1667	-0.564472	0.155264	0.875774	-0.110535	-0.410609	0.0628361	0.0376636			19.1667	-0.133435	0.705535	0.197077	0.0607285	-0.178782	0.0515672	0.468622			19.1667	0.0838699	0.360382	0.146306	0.0727659	-0.132117	0.141597	0.0919281			19.1667	-0.287004	0.0815666	0.0419991	-0.329694	-0.411944	-0.0181084	0.00521703
19.2	0.509648	0.446464	1.17992	0.012848	-0.469708	-0.196834	0.502591			19.2	0.151715	0.462643	0.335669	0.0698899	-0.137539	0.205717	0.693748			19.2	0.107187	0.333947	0.351842	-0.18297	-0.0010291	-0.038004	0.0722178			19.2	-0.170062	0.510353	0.0192523	-0.150139	-0.117916	0.0724117	-0.117713
19.2333	-0.188787	-0.0958583	0.83808	-0.325029	-0.338109	0.247625	-0.029717			19.2333	-0.0173385	0.650073	0.366571	-0.229249	0.0801651	0.0802463	0.623415			19.2333	0.302356	0.301412	0.582188	0.0420661	-0.260951	0.542818	0.622931			19.2333	-0.15319	0.0681853	0.178964	-0.216928	-0.259637	0.320085	-0.261937
19.2667	0.0831256	0.135315	0.564228	-0.369066	-0.261807	-0.0519018	-0.00950284			19.2667	0.196811	0.470625	0.361356	0.0547537	-0.290505	0.0850261	0.750332			19.2667	-0.0104045	0.155003	0.140165	-0.071753	-0.000196978	-0.0485671	0.513737			19.2667	-0.171516	0.230508	0.161057	0.0163484	-0.329028	0.357173	-0.014626
19.3	0.420366	0.307588	1.07932	-0.245261	-0.106675	-0.102628	0.152211			19.3	-0.00171857	0.598611	0.258331	-0.0205289	0.0806872	0.196158	0.564977			19.3	-0.00972465	-0.0351252	0.168805	0.0516983	-0.222187	-0.15333	0.407983			19.3	-0.236096	0.119966	0.398205	-0.184985	-0.174957	0.248423	-0.171918
19.3333	-0.380241	0.311721	0.853931	-0.312359	-0.12389	-0.136446	-0.0465622			19.3333	0.0138979	0.692418	0.658341	0.141588	-0.0863756	-0.145602	0.609231			19.3333	0.431225	0.327847	0.315894	-0.0825774	-0.0100497	-0.00562647	0.347688			19.3333	-0.178789	0.254361	0.179932	-0.214508	-0.130853	0.0177225	-0.0794787
19.3667	-0.0801835	-0.154586	0.453522	0.0854107	-0.0118648	0.118393	0.0848302			19.3667	0.408197	0.545313	0.497795	0.0854244	-0.0623603	-0.173086	0.782146			19.3667	0.0851301	-0.0595266	0.255433	-0.170094	-0.156763	0.127725	0.280985			19.3667	-0.154062	0.303814	0.164929	-0.236771	-0.230234	0.108871	-0.286136
19.4	-0.226182	-0.0403571	0.683916	-0.387984	-0.39269	0.614786	0.964149			19.4	-0.114152	0.5312	0.345283	0.0408125	-0.282674	0.230812	0.749924			19.4	-0.00488034	0.186522	0.321017	-0.157878	-0.238645	-0.185006	0.141118			19.4	-0.136608	0.15371	0.25398	-0.303559	-0.356078	-0.0231373	-0.260001
19.4333	-0.056846	0.220025	0.141603	-0.269189	-0.442956	-0.0108377	0.182532			19.4333	0.0563277	0.557925	0.542546	0.126451	-0.0498306	-0.0488097	1.78855			19.4333	-0.129744	0.366482	0.370302	-0.114587	-0.0437466	-0.354352	0.157548			19.4333	-0.332675	-0.0371206	-0.00736637	-0.187889	-0.231411	0.292426	-0.308883
19.4667	-0.412957	0.0358476	0.80141	-0.283982	-0.250113	0.175158	0.0545089			19.4667	-0.206222	0.568426	0.402322	-0.0308852	-0.0326023	0.0766614	2.4031			19.4667	0.302771	0.0492633	0.308045	-0.271721	-0.302831	0.0788792	0.240155			19.4667	-0.307076	0.0431678	0.162509	-0.108033	-0.00794916	0.0673828	-0.105129
19.5	-0.508184	0.32922	0.555851	-0.0473685	-0.300629	-0.18838	0.108413			19.5	0.290673	0.234688	0.597732	0.147563	-0.0294698	-0.0129608	3.0408			19.5	-0.21134	0.15297	0.250376	0.0242568	-0.0530648	0.141391	0.32319			19.5	-0.221842	0.246216	0.086041	0.00328112	-0.210241	0.121443	-0.0233375
19.5333	-0.408692	0.147818	0.434891	-0.21926	-0.602682	-0.309157	-0.0128719			19.5333	0.0221854	0.316883	0.209666	-0.117719	-0.292072	-0.230444	3.86708			19.5333	-0.299403	0.0258785	0.208706	0.117325	-0.0579633	0.0315196	-0.0277673			19.5333	-0.383001	0.162437	-0.0620556	-0.25855	-0.0449967	0.145959	-0.165142
19.5667	-0.235166	-0.168186	0.0272372	-0.147138	-0.318589	-0.0084222	0.125259			19.5667	0.177534	0.689415	0.619817	-0.00539274	-0.205408	-0.174281	3.82822			19.5667	0.222999	0.123484	0.43736	-0.374383	-0.291033	-0.162347	-0.0466534			19.5667	-0.381255	-0.207588	0.0913646	-0.269681	-0.296685	-0.0872557	0.00908876
19.6	-0.785932	-0.0232074	0.655451	-0.398679	-0.385257	-0.0676028	-0.309347			19.6	0.0800715	0.253331	0.210891	-0.00618936	-0.156333	-0.0213255	2.22006			19.6	0.118885	0.191605	0.40764	-0.0202523	-0.0929785	0.141482	0.279879			19.6	-0.364674	0.114147	0.0676498	0.0124767	-0.280219	0.114529	0.0100568
19.6333	-0.416237	0.213308	0.978112	-0.342097	-0.445733	-0.061564	-0.026348			19.6333	0.241933	0.291413	0.501898	-0.201765	-0.10517	0.104146	2.51602			19.6333	0.164565	0.0319789	0.38904	0.0922779	-0.148307	-0.0482378	0.0493449			19.6333	-0.294276	0.00651446	0.0289318	-0.103677	-0.194363	0.0189797	-0.155463
19.6667	-0.529754	-0.259715	0.594294	-0.538677	-0.141301	-0.0349931	-0.215014			19.6667	0.235467	0.521785	0.548448	-0.0332752	0.00811931	-0.0547845	2.14221			19.6667	-0.211547	0.142802	0.351992	-0.146481	-0.144818	-0.252567	0.104014			19.6667	-0.28264	0.0274593	0.13831	-0.105613	-0.184954	-0.0595968	-0.17821
19.7	-0.755812	-0.0748874	0.499755	-0.213438	-0.153863	0.362363	-0.289133			19.7	0.143469	0.449558	0.477884	-0.168306	-0.364117	0.147164	2.38358			19.7	-0.0762756	0.182455	0.342917	-0.345898	-0.0315264	0.00402279	-0.0405604			19.7	-0.296894	0.188036	0.256884	-0.205312	-0.20142	0.103842	-0.230963
19.7333	-0.38734	0.473908	0.109681	-0.235393	-0.559139	-0.152147	0.00397332			19.7333	-0.0915765	0.623098	0.436768	-0.131661	-0.20854	0.10773	1.71552			19.7333	-0.0515605	0.0411295	0.287355	-0.223925	-0.310002	0.127196	0.0571336			19.7333	-0.238714	0.133347	0.14073	-0.264357	-0.0908652	-0.0155939	-0.0383408
19.7667	-0.695854	0.0176409	0.194836	-0.386941	-0.368767	0.135302	-0.0398242			19.7667	0.137001	0.466422	0.260987	-0.184239	-0.0587058	-0.070319	0.627143			19.7667	0.0979705	0.0675644	0.221459	-0.268802	-0.0700373	-0.0249089	-0.0255918			19.7667	-0.277695	0.139165	0.155733	0.0202202	-0.257873	-0.110514	-0.196117
19.8	-0.0126317	0.102817	-0.137195	-0.57884	-0.543233	-0.212535	0.367829			19.8	0.0181972	0.352426	0.19182	-0.061556	-0.181915	0.0109385	1.04074			19.8	0.0601206	0.0279119	0.517424	-0.128031	-0.222888	0.104646	0.0227111			19.8	-0.19188	0.240398	0.181384	-0.176274	-0.386657	0.381689	-0.169982
19.8333	-0.372293	0.0302767	0.837701	-0.188141	-0.531035	-0.475828	0.0376636			19.8333	-0.101677	0.290848	0.00429191	-0.119711	-0.303557	-0.130067	1.38942			19.8333	-0.0181757	0.21194	0.456637	-0.0483654	-0.274183	-0.136643	0.0423051			19.8333	-0.320748	0.0582947	0.139278	-0.214992	-0.230823	0.0629825	-0.0804466
19.8667	-0.222146	0.158873	0.0656719	-0.155523	-0.473204	-0.200457	-0.191431			19.8667	-0.0251089	0.289054	0.435824	0.0268713	-0.134406	-0.0249105	0.954706			19.8667	-0.158897	0.383767	0.14546	-0.263134	-0.26563	0.104172	0.508438			19.8667	-0.237842	-0.0307208	0.102012	-0.122069	-0.163196	0.251566	-0.159335
19.9	-0.855992	0.123492	0.0821016	-0.249296	-0.582103	0.155834	0.118521			19.9	0.0436829	0.36114	0.140246	-0.353127	-0.0613162	-0.175476	0.397764			19.9	0.0140158	0.0228283	0.517959	-0.10168	-0.0404264	0.00232737	0.10931			19.9	-0.104318	0.0577129	0.330933	0.0521626	-0.182602	0.00452169	0.0289318
19.9333	-0.370594	-0.034246	0.0149512	-0.377251	-0.711319	-0.222197	0.654198			19.9333	-0.154094	0.411301	0.42722	-0.0173423	-0.261792	0.0969757	0.686147			19.9333	-0.344355	0.351231	0.578366	-0.0648792	-0.388206	-0.0084056	0.148992			19.9333	-0.214861	-0.0190847	-0.0359209	-0.0214017	-0.212005	0.0598395	-0.199021
19.9667	0.246434	-0.00979568	0.248707	-0.605073	-0.312447	-0.205288	0.492484			19.9667	0.135279	0.421319	0.137538	-0.149983	-0.176694	-0.162331	0.571873			19.9667	-0.058902	0.363432	0.19104	-0.175238	-0.336353	0.0353691	0.412979			19.9667	-0.285549	0.0239685	0.235105	-0.0901261	-0.114387	0.1095	-0.24403
20	-0.668781	-0.0652997	0.560667	-0.256344	-0.358102	-0.282586	-0.198169			20	0.31844	0.530505	0.185919	-0.0547845	-0.254483	-0.0918283	0.816938			20	-0.138621	0.205839	0.154758	0.161275	-0.0851184	-0.218162	0.421917			20	-0.274495	0.107166	0.0144125	-0.106097	-0.209064	0.22705	-0.186921
20.0333	-0.316464	0.228785	0.386958	-0.22615	-0.382042	-0.292248	0.26002			20.0333	-0.0158399	0.441431	0.176135	-0.192604	-0.117178	0.00615859	0.419503			20.0333	-0.222924	0.0685811	0.241414	-0.165083	-0.121899	-0.0374017	0.227938			20.0333	-0.364092	0.27647	0.193967	-0.00107472	-0.156139	0.0516675	-0.119165
20.0667	-0.437395	-0.0698556	0.071915	-0.38429	-0.0727858	-0.0204999	0.0545089			20.0667	-0.0496331	0.465145	0.215361	-0.211723	-0.0315582	-0.0583693	0.249665			20.0667	0.0360786	0.333947	0.267183	0.189195	-0.0307133	0.0940146	0.507031			20.0667	-0.30853	0.022223	0.106852	-0.0688312	-0.192599	0.113271	-0.182082
20.1	-0.661385	-0.0952434	0.0528085	-0.421011	-0.0410225	0.100277	-0.0735146			20.1	-0.0381818	0.64629	-0.0283514	-0.230046	-0.171995	-0.322456	0.386515			20.1	-0.0986928	0.309546	0.405158	-0.0418043	-0.14936	0.206917	0.19531			20.1	-0.359729	0.0175687	0.117983	-0.217412	-0.369604	-0.00490754	-0.292912
20.1333	-0.884282	0.131331	0.389303	-0.344245	0.00845235	0.0918226	0.384674			20.1333	-0.383584	0.300101	0.234078	-0.387383	-0.32444	-0.127677	0.350675			20.1333	-0.127459	0.369533	0.231754	0.0244637	-0.0893413	0.159812	0.370467			20.1333	-0.27624	0.138583	0.0686178	-0.109001	-0.176133	-0.226807	-0.0456004
20.1667	-0.148966	-0.165374	0.33403	-0.319013	-0.182701	0.0821604	-0.130788			20.1667	0.35039	0.32738	0.216267	-0.0962099	-0.291027	0.0730766	0.321478			20.1667	-0.123908	0.455954	0.189968	0.141577	-0.194653	0.444713	0.485393			20.1667	-0.394637	0.0693488	0.192999	-0.102709	-0.227294	-0.00113585	-0.13078
20.2	-0.496608	0.337711	0.352289	-0.452509	-0.172475	-0.324858	-0.356514			20.2	-0.109445	0.738156	0.112371	-0.234427	-0.0122415	0.0157183	0.0674162			20.2	-0.329743	0.456971	0.149866	-0.0962833	-0.260046	-0.10888	0.51001			20.2	-0.381546	-0.0324662	0.10056	-0.2963	-0.0891009	-0.0407384	-0.16853
20.2333	-0.55865	-0.0959191	-0.0381121	-0.331558	0.00895336	0.0423041	0.458794			20.2333	-0.0875947	0.331539	0.345066	-0.133652	-0.338536	0.089806	0.647864			20.2333	-0.132502	0.166187	0.341288	-0.168615	-0.118952	0.187711	0.350635			20.2333	-0.344893	0.339886	0.125243	-0.179662	-0.301977	0.212592	-0.0557639
20.2667	-0.648549	-0.302642	0.10265	-0.477315	-0.475057	-0.092966	0.064616			20.2667	0.140393	0.445469	0.559376	-0.124889	-0.122398	0.0479823	0.76408			20.2667	-0.0971951	0.0634975	0.15182	-0.325821	-0.106611	-0.0359149	0.197826			20.2667	-0.24366	0.237489	0.238977	-0.0436646	-0.198479	0.217621	0.0947524
20.3	-0.221262	0.192962	0.442454	-0.294521	-0.413229	-0.17751	0.105044			20.3	0.213936	0.378638	0.683483	0.0276679	-0.211151	-0.20535	0.773792			20.3	-0.0060799	0.37665	0.0550354	0.033217	-0.109652	0.186074	0.340977			20.3	-0.15319	0.210145	0.0531306	-0.0499562	-0.233175	0.395518	0.00860486
20.3333	-0.230896	0.254892	0.294391	-0.163176	-0.0572422	-0.204081	0.0814612			20.3333	0.320558	0.691962	0.32806	-0.00419776	-0.0654928	-0.0261054	0.698314			20.3333	-0.15686	0.246508	0.212061	0.0252891	-0.11338	0.0728965	-0.0139287			20.3333	-0.304458	0.108329	0.277695	-0.192245	-0.26787	0.0372094	-0.149655
20.3667	-0.317498	0.0959615	0.35455	-0.213971	-0.157695	0.211392	0.283603			20.3667	0.106814	0.547181	0.209233	-0.151975	-0.205408	-0.176671	0.577807			20.3667	-0.154285	-0.119514	0.431181	0.204977	-0.224029	-0.0868382	0.32637			20.3667	-0.356529	0.147892	0.125727	-0.183049	-0.0408804	0.324485	-0.163206
20.4	-0.479592	-0.232252	0.156909	-0.0562536	-0.413759	-0.228236	0.169056			20.4	-0.138961	0.263655	0.579831	-0.0519963	-0.0242491	0.159114	0.397886			20.4	0.0862235	0.150936	0.314321	-0.342541	-0.00386516	0.0474499	0.25927			20.4	-0.0909371	0.546425	0.439827	-0.116745	-0.342553	0.364088	-0.0635075
20.4333	-0.782762	-0.214824	0.0780737	-0.163931	-0.363131	-0.237898	0.6104			20.4333	0.342106	0.568141	0.447508	0.000582053	-0.329139	-0.069124	0.352772			20.4333	0.242567	0.336997	0.301816	-0.225308	0.0720312	0.172882	0.414495			20.4333	-0.124391	0.175818	0.320285	-0.108517	-0.124384	0.220764	-0.118681
20.4667	-0.275828	0.289093	0.390548	-0.096644	-0.308365	-0.359883	-0.0566694			20.4667	0.163567	0.239678	0.444054	0.0105401	-0.280586	-0.266293	0.863997			20.4667	0.220148	0.00249384	0.369798	-0.102287	-0.284897	-0.293637	0.279517			20.4667	-0.112755	0.233416	0.0337715	-0.108517	-0.236115	0.396147	-0.285652
20.5	-0.565248	-0.193609	0.312739	-0.43401	-0.147302	-0.274131	-0.0566694			20.5	-0.0835807	0.620535	0.225569	-0.157551	0.155343	-0.271073	0.303039			20.5	-0.109281	0.16212	0.272105	-0.105364	-0.145159	0.252411	-0.00931301			20.5	-0.340238	0.112402	0.186708	0.168317	0.17082	0.0818409	-0.181114
20.5333	-0.387101	-0.243666	0.0388109	-0.447584	-0.189649	-0.252391	0.172425			20.5333	-0.043879	0.320647	0.386288	-0.161534	-0.144847	0.166284	0.596881			20.5333	-0.0237977	-0.0198742	0.537943	-0.0261478	0.0158958	0.196625	0.145808			20.5333	-0.152899	0.154873	0.113144	-0.124972	-0.139674	0.327628	-0.0954499
20.5667	-0.428908	-0.0250444	0.192564	-0.221495	-0.492787	0.141341	0.361091			20.5667	0.20318	0.658594	0.555787	-0.0440299	-0.100994	-0.115728	0.607991			20.5667	-0.137254	0.0960328	0.269544	-0.088972	-0.232816	-0.11968	0.270518			20.5667	-0.174425	0.352686	0.336256	-0.0276933	-0.0544056	0.382946	0.00279711
20.6	-0.736336	-0.0504198	0.144479	-0.550125	0.0670109	-0.292248	0.142104			20.6	-0.0741407	0.283141	0.323189	-0.050403	-0.0926404	-0.0762938	0.550381			20.6	-0.110292	0.314629	0.186653	0.00966639	-0.16835	-0.174128	0.121413			20.6	-0.37631	-0.0545746	0.261724	-0.092062	-0.217297	-0.0885129	-0.142396
20.6333	-0.555796	0.318492	0.524641	-0.204027	0.062715	-0.176302	-0.029717			20.6333	-0.04711	0.495938	0.441213	0.0671017	-0.279542	-0.19101	0.46737			20.6333	-0.221455	0.293278	0.287416	-0.299627	-0.0655617	-0.32117	0.0415366			20.6333	-0.277404	0.164182	0.0671659	-0.17095	-0.13791	-0.0646256	-0.0393087
20.6667	-0.811198	0.144946	0.433039	-0.360775	-0.212274	-0.111083	-0.400311			20.6667	-0.237621	0.671234	0.230403	-0.222876	-0.249262	-0.161136	0.527668			20.6667	-0.158001	0.623715	0.139808	-0.107622	-0.102169	-0.0711947	0.305224			20.6667	-0.147663	0.239235	0.200743	-0.176758	-0.106743	0.0214942	-0.230963
20.7	-0.447843	-0.192264	-0.100699	-0.314664	-0.472051	3.21714e-05	-0.0903598			20.7	-0.0967912	0.462526	0.20757	-0.0308852	-0.0576616	-0.0273003	0.307034			20.7	-0.0791387	0.325813	0.181802	-0.182443	-0.0999283	-0.0118829	0.308316			20.7	-0.4054	0.427738	0.024576	0.0405472	-0.221414	0.215735	-0.181114
20.7333	-0.048379	0.0994045	-0.0387741	-0.0477151	-0.56526	-0.178718	0.303818			20.7333	-0.0413836	0.398242	0.386104	-0.132457	0.00342063	-0.231639	0.228749			20.7333	0.033767	0.16822	0.237903	-0.202498	-0.208854	-0.0610883	0.0983275			20.7333	-0.230569	-0.0516655	0.271888	-0.194181	-0.241996	0.0284089	-0.150139
20.7667	0.209469	0.000203651	-0.0590337	-0.528386	-0.301202	-0.0639795	0.0174495			20.7667	-0.165541	0.444381	0.206702	-0.0934217	-0.0623603	-0.0918283	0.412192			20.7667	-0.0878698	0.263793	0.319518	-0.386969	-0.219912	0.0285514	0.216553			20.7667	-0.299513	0.279379	0.083621	-0.146751	-0.259637	0.365973	-0.0475363
20.8	-0.764544	0.164472	0.822043	-0.439015	-0.423563	3.21714e-05	-0.184693			20.8	-0.0227674	0.415079	0.365857	-0.106965	-0.163642	0.106536	0.380377			20.8	-0.291176	0.314629	0.162408	-0.137786	-0.285903	-0.0849972	0.00944985			20.8	-0.261114	0.00302367	-0.0436646	0.0594223	-0.32844	0.397404	-0.149655
20.8333	-0.637912	-0.0521844	0.237181	-0.0223326	-0.493611	0.032642	0.246544			20.8333	-0.0725277	0.402119	0.312706	-0.181849	-0.0143298	0.089806	0.331465			20.8333	0.0895647	0.301412	0.192323	-0.00538262	-0.350312	0.0172633	0.369561			20.8333	-0.23086	0.0303683	0.245269	-0.21838	-0.0544056	0.237737	-0.139976
20.8667	-0.672263	-0.196334	-0.0259142	-0.349735	-0.409443	-0.196834	0.243175			20.8667	0.127559	0.335244	0.277392	-0.272666	-0.286329	-0.0488097	0.450686			20.8667	-0.0582773	0.223124	0.628776	-0.244225	-0.190939	-0.0854561	0.216105			20.8667	-0.332093	0.0408406	0.0211881	-0.169498	-0.34667	0.230822	-0.225155
20.9	-0.865235	0.0818639	0.0861289	-0.422282	-0.308952	-0.239106	0.172425			20.9	-0.273231	0.384512	0.288304	-0.311303	-0.101516	-0.0774888	0.266476			20.9	-0.217694	0.199739	0.274801	-0.0517103	-0.297291	-0.0870297	-0.160833			20.9	-0.246278	0.182218	0.222038	-0.112389	-0.287276	0.0705259	-0.117713
20.9333	-0.407316	0.28196	0.410369	-0.467303	-0.354603	-0.127991	-0.309347			20.9333	-0.430285	0.306934	0.344784	-0.268285	-0.220026	-0.0189356	0.282394			20.9333	0.0318303	0.131618	0.185097	-0.0739946	-0.114525	0.153474	0.186035			20.9333	-0.195952	0.146728	0.0966884	-0.191761	-0.0291193	-0.0658829	-0.0935139
20.9667	-0.479936	0.019941	0.027348	-0.229926	-0.365609	-0.0977971	0.0174494			20.9667	-0.200391	0.336139	0.365669	-0.165518	-0.173561	-0.275853	0.175064			20.9667	0.22015	0.356315	0.424763	-0.064865	-0.198188	0.284189	0.29118			20.9667	-0.303294	0.125783	0.184288	-0.143364	-0.24376	0.0805837	-0.2087
21	-0.20415	0.0270496	-0.135692	-0.268161	-0.472944	-0.0688106	0.111783			21	-0.148386	0.406804	0.334763	-0.0878451	-0.0268595	0.0479823	0.222825			21	-0.35551	0.16212	0.152086	-0.158729	-0.0902839	0.0335104	0.0622045			21	-0.421981	-0.19537	0.18332	-0.12836	-0.110271	0.00703612	-0.126424
21.0333	-0.634033	0.200196	0.415704	-0.326364	-0.462816	-0.118329	0.212854			21.0333	0.125626	0.443095	0.293553	-0.106965	-0.271189	-0.118118	0.137612			21.0333	0.142335	0.196689	0.329832	-0.182505	-0.0647205	0.250514	0.149079			21.0333	-0.287295	0.239816	0.0986243	-0.0276933	-0.0961576	0.0856126	-0.163206
21.0667	-0.897554	-0.0487572	0.113606	0.397902	-0.365885	-0.077265	-0.029717			21.0667	-0.10331	0.470299	0.152527	-0.136839	-0.157899	-0.0607593	-0.0245734			21.0667	0.0421028	0.585079	0.434609	0.413553	-0.104179	0.462638	0.304813			21.0667	-0.267514	0.142656	0.0986243	-0.123036	-0.0696951	0.287397	-0.101742
21.1	-0.776416	0.146053	0.204503	-0.512759	-0.391985	-0.28017	-0.215014			21.1	0.105883	0.387142	0.163579	-0.0591661	-0.333315	-0.256733	0.409913			21.1	-0.171352	0.116367	0.185784	-0.24652	-0.159381	-0.0351557	0.114008			21.1	-0.393764	0.167091	0.0511947	-0.235803	-0.184366	0.084984	0.0686178
21.1333	-0.456849	-0.048971	-0.0356108	-0.290197	-0.703635	-0.103836	-0.0566694			21.1333	0.283916	0.374482	-0.022324	-0.0551829	-0.259181	-0.114533	0.0127972			21.1333	0.0902009	0.114334	0.191797	-0.201008	-0.104602	-0.139386	0.245298			21.1333	-0.218351	-0.0027944	0.129599	-0.213056	-0.0150058	0.170475	0.0226402
21.1667	-0.427867	0.0763958	0.0612903	-0.0637342	-0.437966	-0.172679	0.0174495			21.1667	0.380607	0.4458	0.0728898	-0.251157	-0.246651	-0.0547845	0.333172			21.1667	-0.398829	0.453921	0.37587	0.0583483	-0.237519	-0.174391	0.465085			21.1667	-0.249769	-0.0324662	0.288343	-0.29872	-0.129677	0.00515027	-0.181114
21.2	-0.481149	-0.0031351	0.246914	-0.386529	-0.159644	-0.297079	-0.218383			21.2	0.0356761	0.532325	0.189943	-0.0153507	-0.26649	0.0539571	0.220861			21.2	-0.0422268	0.557627	0.259907	-0.0525875	-0.0731875	0.199462	0.409382			21.2	-0.325403	0.4609	0.429179	-0.0422126	-0.234939	-0.0124509	-0.053344
21.2333	-0.551597	0.284336	0.423625	-0.142366	-0.237015	-0.207704	-0.0128719			21.2333	-0.047232	0.455824	0.453702	-0.194993	0.0530174	-0.155161	0.218873			21.2333	-0.120458	0.26481	0.294798	-0.173724	-0.305241	0.0523889	0.354097			21.2333	-0.0950097	0.231089	0.252528	-0.188857	-0.217885	0.137159	-0.0412446
21.2667	-0.878603	-0.451321	-0.242432	-0.230594	-0.400132	-0.132822	-0.373359			21.2667	-0.000474463	0.0905621	0.368158	-0.0563778	-0.193922	0.0957809	0.361675			21.2667	-0.237103	0.1001	0.269505	-0.312196	-0.0473833	-0.180935	0.240737			21.2667	-0.266932	0.150219	0.201711	-0.0838345	-0.287864	0.171104	-0.141428
21.3	-0.300474	0.0336335	0.129416	-0.3806	-0.639954	-0.223405	-0.208276			21.3	0.290482	0.567684	0.103613	-0.00977429	-0.139627	-0.0762938	0.141157			21.3	-0.12775	0.072648	0.218826	-0.0906972	0.0205487	0.0201018	-0.144498			21.3	-0.281768	0.188036	0.172188	-0.24403	-0.0990979	0.0956704	-0.212088
21.3333	-0.38315	0.140659	0.225189	-0.453454	-0.393742	-0.346597	-0.0533004			21.3333	-0.126622	0.467638	0.416065	-0.193799	-0.194444	0.352698	0.369529			21.3333	0.0951273	0.269893	0.431854	-0.162475	0.172757	0.577968	0.686055			21.3333	-0.273913	0.0070962	0.197839	-0.124488	-0.314915	0.0504103	-0.0267254
21.3667	-0.493211	0.221296	0.489445	-0.305413	-0.166558	-0.148523	0.0511399			21.3667	-0.0226833	0.682422	0.198759	0.0515672	-0.29155	0.105341	0.319436			21.3667	-0.256963	0.223124	0.161114	-0.0531893	-0.0592457	-0.189384	0.218603			21.3667	-0.249478	0.260761	0.13589	-0.175306	-0.333144	0.248423	-0.0175298
21.4	-0.0610615	0.027484	-0.0518454	-0.603202	-0.453564	-0.146108	0.0713541			21.4	-0.201421	0.186786	0.283973	-0.269479	-0.312432	-0.159941	0.0964196			21.4	-0.241209	0.0685811	0.305751	-0.260819	-0.328677	0.276604	0.171381			21.4	-0.135154	0.105421	0.231717	-0.0794787	-0.361959	0.465294	-0.0954499
21.4333	-0.164241	0.00622593	0.277814	-0.450549	-0.719264	-0.332104	0.458794			21.4333	-0.0942404	0.417599	0.376894	-0.253945	-0.307734	-0.136042	0.183155			21.4333	-0.471135	0.10925	0.195945	0.0465834	-0.159279	-0.166462	-0.0062551			21.4333	-0.150572	0.148474	0.130083	0.026028	-0.058522	0.148474	-0.0896422
21.4667	-0.611051	0.150773	-0.138886	-0.402047	-0.414567	0.0773294	-0.127419			21.4667	-0.0359865	0.488029	0.260739	-0.132855	-0.135972	-0.108558	0.185506			21.4667	0.0589127	0.229224	0.126764	0.113552	-0.128835	-0.232123	0.233889			21.4667	-0.158135	0.366649	0.448539	-0.17337	-0.0408804	0.303112	-0.216444
21.5	-0.168113	0.633108	-0.0384669	-0.389482	-0.219898	-0.442011	0.105044			21.5	0.0414334	0.500524	0.174183	-0.18862	-0.327572	-0.0930233	0.108888			21.5	-0.265901	0.16822	0.138138	-0.297455	-0.31204	0.0501553	0.340043			21.5	-0.180244	0.135674	0.146538	0.00231321	-0.0755757	0.0900128	-0.0383408
21.5333	-0.66348	-0.298768	0.213974	-0.476824	0.0925615	-0.146108	0.0578779			21.5333	-0.186022	0.446662	0.266009	0.0137266	-0.425722	-0.284217	0.159701			21.5333	-0.300953	0.401051	0.212783	0.00360706	-0.229866	-0.208327	0.0722981			21.5333	-0.286131	0.235744	0.236557	0.0279638	-0.14085	0.133387	-0.13804
21.5667	-0.502268	-0.384884	-0.224563	-0.310615	-0.355736	0.146172	-0.191431			21.5667	0.172571	0.511263	0.19271	-0.197383	-0.102038	0.00735357	0.00899039			21.5667	-0.261508	0.124501	0.393554	-0.189438	-0.115536	-0.352863	0.0429951			21.5667	-0.179371	0.149637	0.260272	-0.0823825	-0.0596982	0.189333	-0.293396
21.6	-0.291025	-0.0072589	0.0301691	-0.213512	-0.349894	0.140133	0.131997			21.6	0.122473	0.59397	0.320693	-0.173484	-0.29416	0.257101	0.370085			21.6	0.131958	-0.0595266	0.377309	-0.226624	-0.250968	-0.0157674	0.348391			21.6	-0.323366	0.154292	0.175092	-0.0364049	-0.102038	0.304998	-0.0509241
21.6333	-0.418248	-0.101078	-0.157255	-0.285066	0.0651814	0.0519662	-0.285764			21.6333	0.0645993	0.232252	0.412601	-0.03925	-0.252394	0.12446	0.507147			21.6333	0.0753297	-0.050376	0.346127	-0.005909	-0.00459527	-0.316976	-0.0159097			21.6333	-0.383292	0.0216413	0.0773294	-0.21354	0.0261581	0.285511	-0.195633
21.6667	-0.505355	-0.0378548	0.0527995	-0.200263	-0.322399	0.00969434	0.15558			21.6667	0.0576906	0.527689	0.206432	-0.236817	-0.141715	0.0539571	0.323445			21.6667	-0.100193	0.217023	0.101925	0.0399693	-0.337398	-0.0199863	0.172855			21.6667	-0.181116	0.186291	0.0507107	-0.265325	-0.184954	0.13653	-0.0417286
21.7	-0.410504	-0.0810661	0.0720321	-0.504578	-0.115114	0.0567973	0.236437			21.7	-0.34085	0.4291	0.0850421	-0.0810737	-0.262313	-0.0774888	0.21141			21.7	-0.306781	-0.110363	0.296604	0.0531617	-0.187608	-0.0978541	0.00949153			21.7	-0.24366	0.128693	0.0424831	-0.171434	-0.182014	0.332028	-0.104161
21.7333	-0.240141	-0.0242465	-0.0422463	-0.434647	-0.343975	-0.0724339	0.196008			21.7333	0.392797	0.529614	0.311947	-0.100591	-0.156855	0.0706866	0.181232			21.7333	-0.195281	0.235324	0.224322	-0.107477	-0.0916641	-0.168354	0.0580088			21.7333	-0.209042	0.617405	0.257852	-0.136104	-0.248464	0.0667542	-0.0983538
21.7667	-0.159586	0.0258153	0.329978	-0.338906	-0.304101	-0.0108377	0.165687			21.7667	0.179791	0.284503	0.170684	-0.242394	-0.10256	-0.0476147	0.341586			21.7667	-0.218508	0.217023	0.0822771	-0.183959	-0.263761	-0.177555	-0.0123155			21.7667	-0.242496	-0.0487566	0.283503	-0.168046	-0.274339	0.381689	-0.073187
21.8	0.567199	0.180292	0.725227	-0.540017	-0.10959	-0.179925	0.222961			21.8	-0.0451482	0.334111	0.284774	-0.118914	-0.143803	-0.0822686	0.0495281			21.8	-0.186252	0.151953	0.37082	-0.120597	-0.234079	-0.19693	-0.0183807			21.8	-0.283222	0.0507312	0.0429671	-0.191761	-0.178485	0.0340664	-0.236771
21.8333	-0.807322	-0.0215665	-0.101989	-0.365744	-0.44329	-0.0917582	0.431841			21.8333	-0.0733792	0.589847	0.401201	-0.36906	-0.187135	-0.0344701	0.239852			21.8333	-0.0759227	0.315646	0.778867	-0.189448	-0.320591	-0.160348	0.307768			21.8333	-0.278859	0.119384	0.0739416	-0.234351	-0.305506	0.31757	-0.125456
21.8667	-0.729649	-0.309945	0.0611968	-0.277386	-0.412725	0.270572	0.29708			21.8667	-0.0300026	0.303072	0.138868	-0.293777	-0.377169	-0.0523945	0.39624			21.8667	-0.411206	0.32988	0.253135	0.0572893	-0.0627347	0.253607	0.175475			21.8667	-0.396382	0.21189	0.11508	-0.0204337	-0.172605	0.126472	-0.0417286
21.9	-0.401277	0.417436	0.810314	-0.467115	-0.347138	-0.346597	0.219592			21.9	-0.0627613	0.416021	-0.00227509	-0.03925	-0.0717576	-0.0667341	0.0500919			21.9	-0.0705541	0.139752	0.503483	-0.36884	-0.358318	-0.211053	0.239307			21.9	-0.189843	-0.100537	0.206067	-0.261453	-0.377248	-0.108	-0.0635075
21.9333	-0.456847	0.146208	0.336574	-0.030922	-0.262993	-0.014461	-0.0667765			21.9333	-0.127366	0.561454	0.236153	-0.326041	-0.0581838	0.0324478	0.0873719			21.9333	-0.13611	0.10925	0.353497	0.0518382	-0.282042	-0.117088	0.0871315			21.9333	-0.179371	0.104257	0.152346	-0.303075	-0.202008	0.161046	-0.232899
21.9667	-0.654852	0.094353	-0.402191	-0.291412	-0.252386	-0.163017	-0.022979			21.9667	-0.133289	0.371646	0.343014	-0.204553	-0.25396	-0.151576	0.19854			21.9667	-0.262862	0.27091	0.385657	-0.000653498	-0.104317	0.177268	0.122462			21.9667	-0.324239	-0.123809	0.110724	-0.188373	0.0637936	0.164189	-0.353409
22	-0.221703	-0.181679	0.341469	-0.279438	-0.398076	-0.136446	0.465531			22	-0.151646	0.304629	0.223777	-0.0348684	-0.108825	-0.167111	0.148352			22	0.424413	0.131618	0.316654	0.262648	-0.0727031	0.505183	0.649304			22	-0.329766	0.0641127	0.0623261	0.165897	-0.273163	0.280482	-0.379543
22.0333	-0.641123	0.358891	0.214584	-0.279356	0.0397993	0.0338497	-0.147633			22.0333	0.0863154	0.380514	0.239087	-0.404112	-0.275887	-0.0942183	0.409004			22.0333	0.00125493	0.318696	0.464999	-0.19581	-0.100339	-0.113101	0.222146			22.0333	-0.307658	0.100184	0.0913646	-0.0465684	-0.0244148	0.250937	-0.20144
22.0667	-0.163767	0.582125	0.190269	-0.531956	0.0490968	-0.257222	-0.255443			22.0667	0.0832092	0.291978	0.287751	0.0304561	-0.0962949	-0.163526	0.345044			22.0667	0.266513	0.178388	0.0300776	-0.0096245	-0.0596764	-0.0914042	0.471793			22.0667	-0.179952	0.126947	-0.104645	-0.13562	-0.230234	0.213849	-0.352441
22.1	-0.248305	-0.0434873	0.151169	-0.237001	-0.204989	0.0423041	-0.0499313			22.1	-0.253175	0.517253	0.374747	-0.125686	-0.182437	-0.0762938	0.15981			22.1	-0.328678	0.128568	0.196079	-0.310785	-0.214154	0.43063	0.404428			22.1	-0.315803	0.133929	0.101528	0.0478069	-0.0291193	-0.0847412	-0.155947
22.1333	-0.446421	-0.107663	-0.0717306	-0.168131	-0.529788	0.234339	0.212854			22.1333	0.00167478	0.536517	0.324877	-0.290192	-0.393353	-0.243589	0.18516			22.1333	-0.321369	0.147886	0.369814	-0.321133	-0.251891	0.336776	0.211876			22.1333	-0.298349	0.174073	0.0371594	-0.266777	-0.230823	0.178647	-0.141428
22.1667	-0.793085	0.0952092	0.3116	-0.535323	-0.559726	-0.249976	0.286973			22.1667	-0.0702269	0.507199	0.324902	-0.0675308	-0.182437	-0.038055	0.355043			22.1667	-0.124718	0.315646	0.0563998	-0.0802278	-0.259251	-0.0140514	0.605544			22.1667	-0.309112	0.206654	0.0884608	-0.204828	-0.128501	0.197505	-0.0214017
22.2	-0.356868	0.242582	0.441268	0.0188487	-0.571947	0.032642	-0.295871			22.2	-0.0419029	0.51164	0.176254	-0.221283	-0.224202	0.00854854	0.184264			22.2	-0.121632	0.15602	0.396006	-0.00284059	-0.144487	0.198205	0.135617			22.2	-0.27624	-0.0691196	0.0453869	-0.172886	-0.0632265	-0.133773	-0.0775428
22.2333	-0.450596	-0.0770199	0.0461238	-0.344191	-0.352394	-0.0422397	-0.215014			22.2333	-0.00813798	0.419174	0.392406	-0.377424	-0.282152	0.241566	0.254721			22.2333	-0.26066	0.0868823	0.138548	0.0010018	-0.302762	0.0396621	0.121732			22.2333	-0.259077	0.198509	0.21623	-0.194665	-0.188482	0.100699	-0.073671
22.2667	-0.879829	-0.142946	-0.561689	-0.255658	-0.628415	-0.129199	0.216223			22.2667	0.00606864	0.532694	0.319805	-0.0802771	-0.0801107	0.237981	0.248338			22.2667	-0.173641	0.0848488	0.238855	-0.0994229	-0.0844402	-0.0635233	0.187289			22.2667	-0.250932	0.235744	0.258336	-0.143364	-0.308446	0.197505	-0.0485043
22.3	0.0606832	-0.148964	-0.0226562	-0.427499	-0.294313	-0.202873	-0.279026			22.3	-0.299836	0.516818	0.13219	-0.214113	-0.00910906	-0.161136	0.150115			22.3	-0.199207	-0.156116	0.0317837	-0.0794854	-0.0727923	-0.0653727	0.0188985			22.3	-0.316676	0.106584	0.0395793	-0.0891582	-0.250816	0.00452169	0.00715295
22.3333	-0.705615	0.372499	0.157603	-0.196444	-0.258726	-0.0676028	0.165687			22.3333	0.184926	0.662501	0.178728	-0.213316	-0.209584	-0.0416399	0.0946935			22.3333	-0.160349	0.205839	0.32979	-0.137282	-0.243399	0.406216	0.488821			22.3333	-0.244823	0.213635	0.285923	-0.254194	-0.0967457	0.0271516	-0.0596357
22.3667	-0.812668	-0.364865	-0.332794	-0.398378	-0.511055	-0.0289543	0.0915683			22.3667	-0.0817181	0.347743	0.353875	-0.0428349	-0.135972	-0.20296	0.0762242			22.3667	-0.28201	0.26786	-0.0209181	-0.212687	-0.115032	0.27235	0.389846			22.3667	-0.164535	0.178146	0.154281	-0.187889	-0.257285	0.399918	-0.184501
22.4	0.0555404	-0.107911	0.346165	-0.406228	-0.438464	-0.386454	-0.208276			22.4	-0.0670715	0.0757493	0.254158	-0.278641	-0.0910743	-0.201765	0.25249			22.4	-0.350533	-0.00258989	0.235614	-0.0425711	-0.262483	0.162351	0.229916			22.4	-0.14359	-0.00453974	0.102496	-0.0697992	-0.288452	0.285511	0.0163484
22.4333	-0.433117	-0.0164485	0.223782	-0.42115	-0.391495	-0.36109	-0.144264			22.4333	-0.280052	0.347874	0.24509	-0.132059	-0.212717	0.0348378	0.228392			22.4333	-0.394595	0.171271	0.350723	-0.0581768	-0.111921	0.0966367	0.0771821			22.4333	-0.206424	0.0734215	0.25882	-0.158851	-0.226706	0.342715	-0.396483
22.4667	-0.802802	-0.110127	0.0983935	-0.410627	-0.149536	0.0507584	-0.0364552			22.4667	-0.118095	0.642545	0.365205	-0.186629	-0.116656	-0.126482	0.141607			22.4667	-0.318209	0.0746815	0.269113	-0.0282447	-0.132805	0.060316	-0.140507			22.4667	-0.29224	0.277052	0.206067	-0.169014	0.0173372	0.414376	-0.311303
22.5	-0.739534	-0.111792	0.270656	-0.340779	-0.521734	-0.380415	0.256651			22.5	-0.193453	0.478724	0.21787	-0.152772	-0.172517	-0.161136	0.340372			22.5	-0.28128	0.0462131	0.234039	-0.162698	0.0487276	-0.0448205	0.287752			22.5	-0.0874462	0.534207	0.198807	-0.299687	-0.0532295	0.332657	-0.115777
22.5333	-0.512929	0.243099	-0.0499074	-0.143914	-0.581955	3.21714e-05	-0.319454			22.5333	0.218794	0.542884	0.397303	-0.139229	-0.241431	-0.1934	0.26486			22.5333	-0.0651486	-0.028008	0.232061	0.18204	-0.139416	-0.132168	0.165665			22.5333	-0.240169	0.124038	0.257368	-0.113357	-0.079104	0.391747	-0.475371
22.5667	0.176871	-0.075146	-0.159285	-0.539642	-0.266309	0.00123997	-0.302609			22.5667	-0.310617	0.633379	0.227036	-0.216901	-0.32444	-0.0464198	0.0496629			22.5667	-0.224773	0.429519	0.097122	0.0773463	-0.253772	-0.0495997	0.160498			22.5667	-0.255587	0.111239	0.162993	-0.118681	-0.0320595	0.0994421	-0.143364
22.6	0.318433	-0.16933	-0.231462	-0.351913	-0.331805	-0.061564	-0.26555			22.6	-0.0435342	0.497235	0.244772	-0.187824	0.10157	0.27622	0.0398014			22.6	-0.133765	-0.105279	0.32905	-0.191461	-0.167571	-0.0743434	0.406631			22.6	-0.196825	0.183964	0.122823	0.132987	-0.0244148	0.377289	-0.109485
22.6333	-0.131777	-0.198648	-0.136221	-0.460855	-0.359966	-0.0663951	0.0309256			22.6333	-0.0434925	0.259132	0.489441	-0.0782855	-0.247696	-0.0930233	0.700542			22.6333	0.209611	0.266843	0.201817	-0.0237358	-0.328827	0.0712303	0.462684			22.6333	-0.177625	0.15371	0.236073	-0.0441484	0.0602653	-0.0061648	-0.232899
22.6667	-0.737265	-0.375793	-0.00612942	-0.390149	-0.36711	0.0398885	-0.0970978			22.6667	-0.0790813	0.316631	0.733908	-0.112541	-0.274843	-0.101388	0.85008			22.6667	-0.086279	0.177371	0.417121	0.180171	0.0163297	0.237567	0.123002			22.6667	-0.437108	0.275306	0.296086	-0.127392	-0.172605	-0.161432	-0.0112382
22.7	-0.342634	-0.155516	-0.0217945	-0.552288	-0.334533	-0.170263	-0.198169			22.7	0.0547353	0.217952	0.148944	-0.113338	-0.226291	-0.159941	0.646064			22.7	-0.289714	0.260743	0.427798	0.00642444	-0.108772	-0.280599	0.297615			22.7	-0.250932	0.128111	-0.0838345	-0.176758	-0.220826	-0.0727976	-0.0799626
22.7333	-0.667687	-0.153441	-0.0905571	-0.296721	-0.520132	-0.477036	0.0881993			22.7333	-0.221608	0.333613	0.252799	-0.167111	-0.221592	-0.131262	0.604294			22.7333	-0.0608329	0.16822	0.33794	-0.138574	-0.149202	-0.189333	0.288002			22.7333	-0.323075	0.291596	0.182836	-0.10029	-0.15908	0.189333	-0.236771
22.7667	0.0582941	0.123359	0.139519	-0.443463	-0.498112	-0.0953815	-0.117312			22.7667	-0.000822259	0.645753	0.300449	-0.0420383	-0.0623603	-0.0440298	0.642472			22.7667	-0.0577326	0.0604473	0.171205	-0.280666	-0.0829031	0.217331	-0.0142289			22.7667	-0.214861	0.541771	0.199291	-0.314691	-0.256697	0.0793264	-0.108517
22.8	-0.680449	-0.176774	0.26109	-0.358143	-0.33019	-0.045863	-0.181324			22.8	-0.183422	0.350798	0.12933	0.00337037	-0.276409	-0.0930233	0.455765			22.8	-0.223692	0.194655	0.230393	-0.0600645	-0.0846782	0.0825598	0.0740878			22.8	-0.256168	0.268325	0.168801	-0.192729	-0.104979	0.0962989	-0.0184978
22.8333	-0.841592	0.265731	0.0903448	-0.349662	-0.430893	-0.014461	-0.225121			22.8333	-0.0760129	0.518428	0.106917	-0.24319	-0.0576616	0.211692	0.0402669			22.8333	-0.145291	0.0197782	0.389255	-0.269581	-0.320981	0.0817879	0.0899831			22.8333	-0.298349	0.00244183	0.373038	-0.0712511	-0.361371	0.21825	-0.147235
22.8667	-0.755348	-0.370706	-0.484562	-0.575577	-0.523979	-0.0494863	0.0410328			22.8667	-0.202956	0.578921	0.260277	-0.171891	-0.233078	0.0957809	0.175904			22.8667	0.00966098	0.0777316	0.505276	0.177238	-0.205998	-0.217157	0.0523565			22.8667	-0.237842	0.16011	0.0357075	-0.0441484	-0.113211	0.257852	-0.32921
22.9	-0.383623	0.214769	0.305864	-0.389281	-0.171593	-0.252391	-0.01961			22.9	-0.0451336	0.57014	0.167041	-0.244784	-0.0712355	0.0384226	0.187454			22.9	-0.191527	0.213973	0.39068	0.0318768	-0.271478	0.128115	0.00192722			22.9	-0.213115	0.177564	0.084105	-0.0330171	-0.358431	-0.0313092	-0.317111
22.9333	-0.252754	-0.0260427	0.344526	-0.33453	-0.133914	-0.131615	-0.346407			22.9333	-0.159641	0.524478	0.252816	-0.0643442	-0.300425	0.0336428	0.372144			22.9333	-0.215455	0.125518	0.339492	-0.122518	-0.0941617	-0.239028	0.456077			22.9333	-0.113045	0.146728	0.0216722	-0.223219	-0.295509	0.0667542	-0.301623
22.9667	-0.301698	-0.0169715	-0.134644	-0.0219876	-0.325618	0.0990692	-0.181324			22.9667	0.0513431	0.287922	0.361247	-0.176671	-0.20593	-0.304532	0.671731			22.9667	-0.295402	-0.124597	0.33307	-0.0757565	-0.282316	0.288349	0.240125			22.9667	-0.313767	0.146728	0.0995923	-0.157399	-0.203184	0.0183511	-0.110453
23	-0.576244	0.105192	0.0240824	-0.315891	-0.567682	0.0266031	0.347615			23	-0.126396	0.446841	0.364399	-0.299353	-0.162076	0.00376873	0.362176			23	-0.0185276	0.250575	0.249655	-0.354964	-0.0980045	0.196473	0.372998			23	-0.235224	0.0210594	-0.0591518	-0.157399	-0.0244148	0.158532	-0.139492
23.0333	0.17271	0.0691729	0.10867	-0.166704	-0.275343	-0.643708	0.529543			23.0333	-0.0203218	0.305837	0.239885	-0.197782	-0.235688	0.0850261	0.375865			23.0333	-0.047683	0.304462	0.387149	-0.0770569	-0.0176534	0.243566	0.491123			23.0333	-0.296022	0.162437	0.199291	-0.322434	-0.131441	0.0742976	-0.195633
23.0667	-0.560634	0.132739	0.231123	-0.291338	-0.382696	0.0833682	-0.0869907			23.0667	0.00711715	0.438848	0.200619	-0.212918	-0.108825	-0.158746	0.303831			23.0667	-0.233621	0.237358	0.456156	0.0181235	0.151094	0.395867	0.357048			23.0667	-0.364965	0.139165	0.0197362	-0.0470524	-0.136145	0.0422383	-0.17337
23.1	-0.60542	-0.0627069	0.267538	-0.217539	-0.126066	0.134095	0.105044			23.1	-0.14357	0.612468	0.252271	-0.0890401	-0.201753	-0.0308852	0.421571			23.1	-0.103901	0.371566	0.218163	-0.0641191	-0.153778	0.17524	0.40061			23.1	-0.342275	-0.067956	0.118467	-0.181597	-0.241407	0.0372094	-0.0746389
23.1333	-0.717071	0.301572	-0.167684	-0.0361452	-0.0716501	-0.136446	0.0612469			23.1333	0.225016	0.398502	0.439707	-0.184637	-0.16573	-0.0739039	0.323176			23.1333	-0.0384528	0.139752	0.239775	-0.276608	-0.145067	0.0683387	0.525761			23.1333	-0.278568	0.0443314	-0.00446255	-0.0393087	-0.217885	0.129615	-0.0775428
23.1667	-0.52298	0.0195621	0.254691	-0.465517	-0.202662	-0.0253309	-0.346407			23.1667	-0.183765	0.382002	0.13176	0.108925	-0.193922	-0.0296903	0.289815			23.1667	-0.134085	0.118401	0.339377	-0.124359	-0.170494	0.285093	0.350637			23.1667	-0.201479	0.121711	0.0173164	-0.25129	-0.380777	0.1095	-0.125456
23.2	-0.784337	-0.0787182	0.411495	-0.325877	-0.345672	-0.107459	0.172425			23.2	-0.138748	0.169238	0.144006	-0.281827	0.0921727	-0.0942183	0.370441			23.2	0.0607593	-0.0341084	0.164742	-0.0542015	-0.284274	-0.0333326	0.0704426			23.2	-0.248896	0.0495676	0.0782973	-0.376156	-0.199656	0.0076647	-0.183533
23.2333	-0.760431	-0.210788	-0.0644549	-0.561148	-0.536766	-0.129199	0.0208185			23.2333	0.053538	0.497796	0.2968	-0.0778872	-0.0315582	-0.0966081	0.397643			23.2333	-0.0699672	-0.00767351	0.291672	-0.1181	-0.136497	0.200145	0.212998			23.2333	-0.428381	0.0623673	0.116047	-0.0494722	-0.127325	0.0372094	-0.0823825
23.2667	-0.208449	0.148394	0.634479	-0.589373	-0.211001	-0.223405	-0.407049			23.2667	0.105519	0.35431	0.275312	-0.0523947	0.0629367	-0.134847	0.587837			23.2667	-0.0616691	0.174321	0.236023	-0.21652	-0.0968648	-0.144043	0.0172423			23.2667	-0.370201	0.242144	0.215262	-0.224671	-0.207888	-0.0633685	-0.238707
23.3	-0.411638	0.0255463	0.328574	-0.367904	-0.444182	-0.438388	-0.00276479			23.3	-0.361898	0.776613	0.356523	-0.178264	-0.105692	0.0551521	0.466743			23.3	0.074044	0.0411295	0.320705	-0.0812976	-0.226884	-0.0398976	0.431135			23.3	-0.254714	0.310214	0.104916	-0.202408	-0.208476	0.042867	-0.109969
23.3333	-0.868004	-0.501552	-0.111923	-0.328244	-0.320157	-0.118329	-0.0364552			23.3333	-0.270561	0.317746	0.176011	-0.0731073	-0.278498	0.148359	0.577419			23.3333	-0.145935	0.480356	0.0461742	-0.416092	-0.184259	0.0617312	0.593058			23.3333	-0.193334	0.0926209	0.0671658	-0.106097	-0.418412	0.0944131	-0.286136
23.3667	-0.70564	0.434836	-0.0738153	-0.539202	-0.360395	-0.130407	-0.44074			23.3667	-0.200149	0.338485	0.219363	-0.0547845	-0.0905521	0.203327	0.47309			23.3667	-0.137719	0.173304	0.247867	-0.191173	-0.0618717	-0.175837	0.119655			23.3667	-0.290204	-0.0283936	0.212359	-0.114809	0.036155	0.0359522	-0.260485
23.4	-0.668198	-0.0656744	-0.0633584	-0.402582	-0.215698	-0.281378	-0.305978			23.4	-0.22697	0.256747	0.200094	-0.254343	0.00237652	0.0408126	0.696233			23.4	-0.220706	-0.0544429	0.190927	-0.0577878	0.0956273	-0.208621	0.249628			23.4	-0.313767	0.0367681	0.265596	-0.215476	-0.109683	0.128987	-0.238223
23.4333	-0.324574	-0.155656	-0.259084	-0.296079	-0.575195	-0.131615	0.317294			23.4333	0.0436459	0.55728	0.166407	-0.173484	-0.196011	-0.127677	0.31205			23.4333	-0.194505	0.251592	0.145263	-0.0977263	-0.160539	0.0688472	0.431467			23.4333	-0.274204	-0.0435204	0.31109	-0.181597	-0.0685189	0.496725	-0.169014
23.4667	-0.830419	0.0568915	-0.324391	-0.506117	-0.547572	-0.158186	-0.363252			23.4667	0.133034	0.21882	0.216904	0.036431	-0.0717576	-0.0966081	0.323993			23.4667	-0.114929	-0.0483426	0.135235	-0.179299	-0.280756	-0.00761968	0.205739			23.4667	-0.121773	0.405629	0.261724	-0.0746389	0.0373311	0.413748	-0.0368889
23.5	-0.723813	-0.12988	0.0910922	-0.421017	-0.138108	-0.362298	-0.349776			23.5	-0.26884	0.625159	0.428555	-0.263505	-0.107258	-0.00101118	0.277866			23.5	-0.264347	0.0472298	0.29449	-0.218453	-0.165278	-0.136775	0.286452			23.5	-0.272168	0.237489	-0.0485043	-0.101742	-0.0103014	0.25408	-0.0412446
23.5333	-0.371364	0.255743	0.185814	-0.276105	-0.411519	-0.0180844	-0.029717			23.5333	0.209335	0.262195	0.259969	-0.0587677	-0.0921184	-0.259123	0.323381			23.5333	-0.107554	0.137719	0.246842	-0.0513181	-0.240309	0.091993	0.177277			23.5333	-0.283804	0.128693	0.153313	-0.197085	-0.0749876	0.173618	-0.280328
23.5667	-0.719959	-0.32866	-0.0168261	-0.617278	-0.355185	-0.108667	-0.393573			23.5667	0.575205	0.40428	0.441074	0.00456525	0.0624147	-0.0308852	0.539885			23.5667	-0.0817687	0.219057	0.327143	-0.0469328	-0.278013	-0.24979	0.466915			23.5667	-0.224751	0.363158	0.109756	-0.0886742	-0.0891009	0.156646	-0.257098
23.6	-0.214624	0.00559447	0.552027	-0.407684	-0.582002	-0.326065	-0.0499313			23.6	-0.289411	0.236951	0.346557	-0.191409	0.00498679	-0.0739039	-0.0175234			23.6	-0.115953	0.348181	0.150444	0.0202798	-0.212486	-0.413121	0.413116			23.6	-0.338202	0.139165	0.044903	-0.305011	-0.037352	0.181162	-0.0785107
23.6333	-0.438121	0.117932	-0.0443091	-0.315153	-0.082439	-0.1449	-0.326192			23.6333	0.128536	0.456401	0.0705277	0.000183796	-0.257615	-0.0464198	0.444295			23.6333	-0.00321918	0.148903	0.263804	-0.141465	-0.22097	0.230132	0.110409			23.6333	-0.430418	0.254943	0.143634	-0.306947	-0.299625	0.227679	-0.131264
23.6667	-0.633848	-0.475531	-0.108251	-0.40155	-0.589556	-0.0917582	-0.0836217			23.6667	-0.0611083	0.597845	0.442068	0.0376259	-0.256049	-0.0966081	0.323995			23.6667	-0.137504	0.219057	0.390187	-0.282649	-0.0483955	0.250063	0.153591			23.6667	-0.259659	0.297996	0.331417	-0.314207	-0.154375	0.178018	-0.191277
23.7	-0.226348	0.262991	0.487014	-0.202384	-0.316705	-0.140069	0.138735			23.7	-0.0786107	0.236853	0.386267	-0.182645	-0.255005	-0.0989981	0.341189			23.7	-0.284867	0.253626	0.0784117	-0.0507552	-0.203406	-0.0841476	0.0128967			23.7	-0.28584	0.16011	0.153798	-0.105129	-0.218473	0.216992	-0.237739
23.7333	-0.409114	0.13055	0.236281	-0.379252	-0.299094	-0.25843	-0.0600384			23.7333	0.0894218	0.456878	0.226056	-0.0830653	-0.298336	0.248736	0.36669			23.7333	-0.258334	0.118401	0.206036	0.175514	-0.0577895	-0.0735644	0.673281			23.7333	-0.285258	0.231671	0.198323	-0.123521	-0.257285	-0.0281662	-0.183049
23.7667	-0.479418	-0.305551	-0.0257274	-0.350025	-0.265161	-0.311572	-0.0330861			23.7667	-0.149464	0.225723	0.305131	0.0336427	-0.211151	-0.266293	0.0764329			23.7667	-0.438028	0.289211	0.0944631	0.00704268	-0.153926	-0.125664	0.304173			23.7667	-0.152317	-0.00570333	0.269468	-0.104645	-0.0961576	0.193105	-0.073187
23.8	-0.915902	0.102796	0.413373	-0.413454	-0.41207	-0.268092	0.0107114			23.8	0.161433	0.786481	0.265339	0.0248797	0.0838196	0.192573	0.00874906			23.8	-0.244075	0.1123	0.25916	-0.071642	-0.286264	-0.0954032	0.205042			23.8	-0.147663	0.0722579	0.167349	-0.139976	0.0402714	0.235851	-0.0184978
23.8333	-0.320936	-0.33255	0.217222	-0.388107	-0.585847	-0.114706	-0.332931			23.8333	-0.162956	0.086448	0.364984	-0.157153	-0.118744	-0.238809	0.500045			23.8333	0.189588	0.135685	0.322493	-0.0508404	-0.44577	-0.00311672	0.37776			23.8333	-0.190425	0.0635309	0.0197362	-0.232899	-0.00383282	0.346486	-0.0818986
23.8667	-0.487123	-0.106756	-0.0436189	-0.583759	-0.412885	-0.0627718	-0.434002			23.8667	0.11105	0.596289	0.157221	-0.281429	-0.264924	-0.106168	0.33552			23.8667	-0.0180724	0.201772	0.142736	0.0105037	-0.251699	-0.159906	0.284204			23.8667	-0.268095	-0.0470112	0.100076	-0.112873	-0.027355	-0.0897701	-0.408098
23.9	-0.693026	-0.0590535	-0.220827	-0.508371	-0.365699	-0.208912	-0.285764			23.9	-0.198032	0.619696	0.267556	-0.0543862	-0.0294698	0.202132	0.21891			23.9	-0.238582	0.160087	0.230976	-0.154272	-0.281711	-0.127969	0.163427			23.9	-0.274204	0.0612037	-0.0712512	-0.0881903	-0.120856	0.117672	-0.187889
23.9333	-0.418315	-0.0740075	0.0125287	-0.476246	-0.505165	-0.222197	-0.329561			23.9333	-0.0125508	0.461157	0.190826	-0.147195	-0.201753	0.148359	0.435677			23.9333	-0.114794	0.174321	0.385853	-0.177004	-0.323078	0.0307595	0.283107			23.9333	-0.287876	0.211308	0.00715295	-0.136588	-0.213181	0.232708	-0.126424
23.9667	-0.561817	-0.040466	-0.0449665	-0.629628	-0.53017	0.0447196	-0.204907			23.9667	0.0435758	0.291177	0.25217	-0.0954133	-0.265968	0.025278	0.454164			23.9667	-0.0700154	0.171271	0.147451	-0.163428	-0.177899	0.0189529	0.525876			23.9667	-0.181116	0.0198958	0.163961	-0.0639915	-0.130853	0.311913	-0.106097
24	-0.695594	-0.234854	-0.209838	-0.452844	-0.444625	0.102693	0.000604298			24	-0.159897	0.268655	0.334208	-0.0531913	-0.194444	-0.0296903	0.306878			24	-0.230716	-0.0259745	0.29839	-0.244912	-0.0588024	0.0191779	0.0902917			24	-0.339657	0.0123324	0.000377294	-0.179662	-0.163784	-0.0614826	-0.194665
24.0333	-0.620031	0.111608	-0.127728	-0.388645	-0.0885208	-0.194418	0.0241875			24.0333	-0.121567	0.419256	0.136088	-0.246775	-0.139627	-0.0332752	0.0637737			24.0333	0.13077	0.065531	0.234961	-0.0244418	-0.324974	0.155201	0.330882			24.0333	-0.21806	0.142074	0.197355	-0.0417286	-0.114387	0.205049	-0.141911
24.0667	-0.487846	0.0154242	0.0895642	-0.326139	-0.31855	-0.198042	-0.380097			24.0667	0.0967863	0.504471	0.11488	-0.438368	-0.00963111	-0.0739039	0.256756			24.0667	-0.321627	0.213973	0.158849	-0.151633	0.0414592	0.148728	0.167325			24.0667	-0.367001	0.342213	-0.013174	-0.268229	-0.263754	0.0812123	-0.147235
24.1	-0.689695	-0.0555035	-0.257449	-0.19381	-0.279146	0.00365552	-0.174586			24.1	-0.046502	0.283464	0.101578	-0.247572	-0.143281	-0.20296	0.363131			24.1	0.148552	0.102133	0.358436	-0.213183	-0.218317	-0.0134571	0.36596			24.1	-0.465907	0.172327	-0.0252734	-0.105613	-0.22847	-0.0558251	-0.122069
24.1333	-0.673042	-0.0810236	-0.112718	-0.112937	-0.524523	-0.11229	-0.0735146			24.1333	0.262225	0.224508	0.13531	-0.0910317	-0.156855	-0.20057	0.106416			24.1333	-0.0701707	-0.0412255	0.12784	0.109343	-0.263086	0.0185232	0.343408			24.1333	-0.288167	0.128693	0.328997	-0.25613	-0.173781	-0.0243945	-0.21596
24.1667	0.234356	0.0106026	-0.018801	-0.542293	-0.124273	-0.014461	-0.585608			24.1667	-0.0416534	0.487561	0.0729937	-0.0408433	-0.142759	0.0611269	0.275238			24.1667	-0.173331	0.0126611	0.100891	-0.0910652	-0.237555	-0.195425	0.279298			24.1667	-0.296894	0.128693	0.125727	-0.140944	-0.281983	0.280482	-0.210152
24.2	-0.232577	-0.0721972	-0.066249	-0.303231	-0.629463	-0.304325	-0.248704			24.2	-0.0579108	0.185859	-0.0133986	-0.174679	-0.269623	-0.0332752	0.118166			24.2	-0.014963	0.125518	0.390664	-0.378692	-0.185139	0.0563035	0.208559			24.2	-0.28264	-0.0155939	0.286891	-0.161754	-0.41606	0.409348	0.0773294
24.2333	-0.762599	-0.0911751	-0.234322	-0.240373	-0.389009	-0.0724339	-0.282395			24.2333	-0.00776854	0.640389	0.214297	0.0754664	-0.0931625	0.0181083	0.0949576			24.2333	-0.206115	0.00757746	0.276053	-0.0243851	-0.174503	0.262595	0.376649			24.2333	-0.341693	0.0361863	0.187192	-0.225639	-0.132617	0.24088	-0.257582
24.2667	-0.564055	-0.239881	0.104461	-0.302488	-0.197586	-0.0180844	-0.147633			24.2667	0.0573158	0.122281	0.164941	-0.0420383	0.0321346	-0.035665	0.194489			24.2667	-0.0413616	-0.00258989	0.165682	-0.116909	-0.141895	-0.121755	0.426618			24.2667	-0.233478	0.222944	0.175576	-0.276941	-0.120268	0.196248	-0.185953
24.3	-0.763902	0.286987	0.766217	-0.310862	-0.708047	-0.519308	0.111783			24.3	0.0960698	0.511752	-0.0414587	-0.175077	-0.22107	-0.0129608	0.0740988			24.3	-0.261894	0.0370626	0.118353	-0.264806	-0.246196	-0.274387	0.389786			24.3	-0.307076	0.176982	0.122339	-0.232899	-0.193187	0.135902	-0.154495
24.3333	-0.730233	0.0661892	-0.0351422	-0.212773	-0.580029	0.0785371	-0.188062			24.3333	-0.223009	0.61869	0.351839	-0.0942183	-0.13023	-0.286607	0.207254			24.3333	-0.198838	0.184488	-0.0989172	-0.241689	-0.215551	0.0549714	0.227717			24.3333	-0.28584	0.0757487	0.217682	-0.136588	-0.155551	0.387975	-0.162722
24.3667	-0.759241	0.090482	0.406964	-0.326934	-0.248853	-0.0482786	-0.336299			24.3667	0.226143	0.701348	0.107748	-0.0229189	-0.376647	-0.138432	0.0571253			24.3667	-0.260527	0.0492633	0.0588583	-0.104483	-0.22393	-0.0203827	0.119766			24.3667	-0.29864	0.102512	0.0681338	0.0903967	-0.259049	0.0579537	-0.103193
24.4	-0.513672	0.0707144	0.391803	-0.174524	-0.446962	-0.321234	0.15558			24.4	-0.0692577	0.383095	0.220241	-0.121304	-0.113523	0.108925	0.22866			24.4	0.131639	-0.0910452	0.273587	-0.128698	-0.023097	0.302922	0.451739			24.4	-0.189552	0.144401	0.194935	0.0453869	-0.0920413	0.135902	-0.178694
24.4333	-0.298299	-0.0759599	-0.282431	-0.476903	-0.172721	-0.176302	-0.0937288			24.4333	-0.114901	0.594189	0.251369	-0.104575	-0.274321	0.0969758	0.364241			24.4333	-0.265089	0.1001	0.125061	-0.256581	-0.345047	0.136382	0.0581726			24.4333	-0.202934	0.154873	0.113144	-0.0456004	-0.212005	0.188705	0.0971724
24.4667	-0.441844	0.135042	-0.10126	-0.398045	0.0231871	-0.108667	-0.107205			24.4667	0.184678	0.63639	0.310163	-0.118516	-0.00336627	-0.0834636	0.19203			24.4667	-0.174845	0.433586	0.0970066	-0.179393	-0.312204	-0.110217	0.334396			24.4667	-0.188971	0.270652	0.203647	-0.277425	-0.214357	0.0975562	-0.293396
24.5	-0.260638	0.00392644	0.247007	-0.0224577	-0.380794	-0.136446	-0.117312			24.5	-0.275246	0.468258	0.271308	-0.122897	-0.10256	-0.0535895	0.130641			24.5	-0.291922	0.0960328	0.247165	-0.197802	-0.0561297	-0.296152	0.412088			24.5	-0.152317	0.227599	0.0758774	-0.232415	-0.277279	0.258481	-0.290008
24.5333	-0.394039	-0.561561	-0.203231	-0.202639	-0.450259	0.0495507	-0.326192			24.5333	0.011863	0.599105	0.16033	-0.234427	0.072334	-0.0535895	0.0731771			24.5333	-0.0953372	0.222107	0.0609313	0.0763876	-0.273482	-0.0522733	0.160516			24.5333	-0.178207	0.390503	0.211874	-0.198537	-0.0855726	0.0642398	-0.0727031
24.5667	-0.548376	0.303396	0.220153	-0.358134	-0.340668	-0.0434475	0.0713541			24.5667	0.153204	0.494376	0.138813	-0.0523947	-0.292072	-0.293777	0.44671			24.5667	-0.31595	0.0848488	0.361139	-0.304321	-0.132204	0.148427	0.287222			24.5667	-0.164535	0.224108	0.0211881	-0.25371	-0.212593	-0.030052	-0.108033
24.6	-0.294527	-0.174432	0.364278	-0.209904	-0.252872	-0.381623	0.101675			24.6	0.208975	0.334256	0.237554	-0.203757	0.139159	0.172259	0.332194			24.6	0.0596898	0.0584139	0.188055	-0.0757745	-0.373707	-0.246334	0.439362			24.6	-0.163953	0.342213	0.194451	-0.250322	-0.148495	0.24968	0.00424902
24.6333	-0.470268	-0.0553146	0.0616928	-0.333619	-0.567842	0.0278109	0.0848302			24.6333	0.0219924	0.435198	-0.021601	-0.0926251	-0.0007559	0.0826362	0.0415862			24.6333	-0.124538	0.316663	0.19985	-0.172678	-0.205603	-0.00745343	0.146247			24.6333	-0.366129	0.27007	0.167349	-0.259518	-0.129089	0.0126935	-0.279361
24.6667	0.109167	-0.0836722	0.428269	-0.429415	0.0871615	0.00607106	-0.275657			24.6667	0.102163	0.382016	-0.0153444	-0.187027	-0.13023	0.341943	0.267267			24.6667	-0.362691	-0.0717274	0.644901	-0.0830813	-0.198867	-0.0121235	0.321774			24.6667	-0.229696	0.0245502	-0.121585	-0.000590716	-0.18613	0.0856126	-0.169982
24.7	0.0641634	0.485	0.494756	-0.381486	-0.527674	-0.18838	0.229699			24.7	-0.165281	0.205847	0.256835	-0.0886419	-0.0419995	-0.247173	0.58252			24.7	-0.180165	0.192622	0.4689	0.0155412	-0.296535	-0.0051558	0.05941			24.7	-0.161044	0.201417	0.19058	-0.209668	-0.237879	-0.109257	-0.247902
24.7333	-0.657933	-0.0495753	0.141826	-0.11313	-0.394939	0.225885	-0.0364552			24.7333	0.0711936	0.349918	0.210781	-0.220088	-0.257615	0.217667	0.442419			24.7333	-0.0261567	0.180421	0.166104	-0.17277	-0.28346	-0.0132821	0.0874269			24.7333	-0.1273	0.318359	0.168317	-0.033985	-0.194951	0.27231	-0.189341
24.7667	-0.173992	0.231515	0.548558	-0.440586	-0.588816	-0.410609	-0.0836217			24.7667	-0.128546	0.275285	0.300322	-0.201367	-0.173562	-0.0320802	0.412181			24.7667	-0.0277991	-0.0208909	0.451918	0.152833	-0.283876	-0.0841644	-0.0645808			24.7667	-0.287004	-0.184898	0.204615	-0.149171	-0.121444	0.0548105	-0.106581
24.8	0.845518	-0.149006	0.392093	-0.135807	-0.264462	-0.0482786	0.138735			24.8	-0.178924	0.338402	0.389321	-0.335601	-0.147458	0.12685	0.334002			24.8	-0.10225	0.235324	0.512751	-0.102999	-0.192848	-0.0299143	0.40219			24.8	-0.313185	-0.120318	0.0957204	-0.0170458	-0.0820443	-0.00679338	-0.0910941
24.8333	-0.493485	-0.403174	-0.355296	-0.0410272	-0.288304	0.213807	0.263389			24.8333	0.0395383	0.530503	0.392471	-0.19101	-0.20854	-0.127677	0.0775772			24.8333	-0.296657	0.057397	0.244165	-0.0193931	-0.256152	0.121263	0.0400579			24.8333	-0.392019	-0.0121032	0.083137	-0.102709	-0.108507	0.184933	-0.198537
24.8667	-0.126814	-0.124817	0.0748473	-0.433089	-0.324756	-0.285001	-0.518228			24.8667	-0.101668	0.237502	0.323439	0.00416699	-0.177216	0.130435	0.383478			24.8667	0.0767413	0.0512967	0.178621	-0.206158	-0.258164	-0.365773	0.451486			24.8667	-0.140681	0.373049	0.0691017	-0.153527	-0.179074	-0.0193656	-0.217412
24.9	-0.358932	-0.0501259	0.402533	-0.291259	-0.174825	-0.167848	0.138735			24.9	0.161133	0.165876	0.637601	0.0615251	0.110967	-0.146797	0.241347			24.9	-0.315015	0.201772	0.356368	-0.384465	-0.0850187	0.236572	0.459481			24.9	-0.315512	-0.0673742	0.0148965	-0.241611	-0.297861	0.0755547	-0.191761
24.9333	-0.865472	-0.27259	-0.19303	-0.112998	-0.619488	-0.0362008	-0.147633			24.9333	-0.110465	0.547177	0.379671	-0.285014	-0.07489	-0.0547845	0.138293			24.9333	0.0900305	0.198722	0.333132	-0.164796	-0.18356	-0.28065	0.210353			24.9333	-0.341111	0.162437	0.124275	-0.135136	-0.18025	0.042867	-0.151107
24.9667	-0.707304	-0.28537	0.199727	-0.52067	-0.269419	-0.295871	-0.0768836			24.9667	-0.00645777	0.550718	0.847399	-0.0133591	-0.219504	0.0874161	0.157693			24.9667	-0.119629	0.422402	0.187314	-0.00591917	-0.300009	-0.154322	0.141989			24.9667	-0.314057	0.0751669	-0.0465684	-0.238223	-0.243172	0.0667542	-0.210636
25	-0.665635	0.263821	0.498395	0.0733384	-0.441593	-0.190795	-0.0499313			25	0.150428	0.573903	1.2401	-0.00937593	-0.0216387	-0.0523945	0.377917			25	-0.0581118	0.0980662	0.403229	-0.195708	-0.133978	-0.0019973	-0.00542253			25	-0.29224	0.0722579	0.250109	-0.00591446	-0.0996859	0.215107	-0.0601197
25.0333	-0.436941	-0.183892	-0.12963	-0.474485	-0.499394	-0.204081	-0.221752			25.0333	-0.060662	0.438309	1.39326	-0.310905	-0.00493253	-0.155161	0.377661			25.0333	-0.0130328	0.460021	0.323096	-0.0214211	-0.354014	-0.0464152	0.363693			25.0333	-0.27624	0.0111688	-0.00785037	-0.204828	-0.374896	0.178647	-0.0770588
25.0667	-0.299284	0.0984035	-0.0689751	-0.354405	-0.199303	-0.0253309	-0.161109			25.0667	-0.114609	0.456262	1.09808	-0.218494	-0.156333	0.194963	0.197026			25.0667	-0.20589	0.411218	0.582597	0.214517	-0.168848	0.217005	0.290673			25.0667	-0.399	0.0105871	0.2564	-0.227575	-0.362547	0.0793264	-0.0935139
25.1	0.283157	-0.00631652	-0.207793	-0.271492	-0.417854	-0.0869272	-0.107205			25.1	0.0979652	0.603129	0.916037	-0.0551829	-0.27902	-0.0774888	0.1642			25.1	-0.0595186	0.396984	0.327661	0.0717155	-0.0604372	0.156883	0.345307			25.1	-0.280022	-0.14359	-0.0397927	-0.0881903	-0.0561698	0.31757	-0.115777
25.1333	-0.746892	0.0970556	-0.205347	0.0953672	-0.405435	-0.137653	-0.107205			25.1333	-0.0192718	0.31469	0.799604	-0.110549	-0.0446099	-0.133652	0.388103			25.1333	0.0827169	0.0228283	0.0979939	-0.0188644	-0.256642	-0.153692	0.562082			25.1333	-0.14679	-0.0173394	0.139762	-0.289524	-0.304918	0.0416097	-0.0165618
25.1667	0.595664	0.0590112	0.15361	-0.413046	-0.349894	-0.132822	-0.326192			25.1667	-0.0412945	0.353631	0.822501	-0.110151	-0.0660148	-0.0464198	0.163178			25.1667	-0.00404656	0.136702	0.170822	0.204205	-0.102387	0.240255	0.146856			25.1667	-0.232315	0.0838939	0.132019	-0.202408	-0.109683	0.00955055	-0.172402
25.2	-0.0692759	0.195658	0.00493883	-0.514041	-0.431687	-0.275339	-0.289133			25.2	-0.0932072	0.261387	0.958099	-0.232037	-0.155289	0.0432024	-0.00767203			25.2	0.0222974	0.386817	0.270498	-0.083005	-0.071404	0.201213	0.437906			25.2	-0.328021	-0.124972	0.107336	0.0531306	-0.11968	0.240251	0.0178003
25.2333	-0.563959	-0.0243735	-0.173352	-0.416671	-0.589826	-0.295871	0.00397332			25.2333	0.133156	0.254812	0.67904	-0.14361	-0.0681031	0.0348378	0.127177			25.2333	0.148247	0.115351	0.0814273	-0.238738	-0.110869	-0.0377858	0.516715			25.2333	-0.260823	0.0105871	0.0502267	-0.223703	-0.18319	0.149731	-0.282264
25.2667	-0.137452	0.164366	0.384413	-0.562092	-0.453505	-0.410609	-0.329561			25.2667	-0.181339	0.336739	0.768991	-0.173882	-0.102038	0.214082	-0.00183837			25.2667	-0.0780787	0.023845	0.146301	-0.225514	0.0352073	0.175245	0.0731465			25.2667	-0.293404	-0.165117	0.0584544	-0.212572	-0.0467609	0.178647	-0.151591
25.3	-0.577741	0.376505	0.483372	-0.255768	-0.460388	-0.149731	-0.380097			25.3	0.115167	0.681484	0.790858	-0.185832	-0.262313	0.100561	-0.0162395			25.3	-0.0555318	0.172287	0.326165	-0.139312	0.0953536	0.103923	0.410323			25.3	-0.287876	0.0332772	0.083621	-0.187405	-0.322559	0.00577885	-0.166594
25.3333	-0.582481	-0.275088	-0.603844	-0.39186	-0.538709	-0.103836	0.0578779			25.3333	0.0393485	0.606825	0.554267	-0.162729	-0.336448	-0.0954133	0.327082			25.3333	-0.0226361	0.484423	0.682426	-0.064072	-0.0370677	-0.074041	0.509365			25.3333	-0.317548	0.0303683	0.083137	-0.124005	-0.160844	0.0485245	-0.0543119
25.3667	-0.252886	0.207551	0.132329	-0.447922	-0.456134	-0.161809	-0.477799			25.3667	0.208332	0.727441	0.603032	-0.124092	-0.127097	0.00735357	0.111938			25.3667	-0.255158	0.124501	0.428101	0.0351488	-0.234252	0.0652982	0.0412286			25.3667	-0.266641	0.174073	0.139278	-0.0848025	-0.226118	0.0453814	-0.0267253
25.4	0.0546364	0.141671	0.202441	-0.270125	-0.570893	-0.33452	-0.137526			25.4	0.0619859	0.529513	0.552885	-0.208536	-0.240387	0.327603	0.0495657			25.4	-0.222757	-0.0615601	0.120231	0.0908372	-0.315266	-0.0361113	0.360381			25.4	-0.368165	-0.0638833	-0.000106711	-0.230479	-0.143202	0.151617	-0.131748
25.4333	-0.980666	0.050215	-0.0378429	-0.27774	-0.312752	0.122017	-0.184693			25.4333	0.0798528	0.395899	0.581297	-0.144805	-0.0132857	0.057542	0.242786			25.4333	0.0051831	0.269893	0.352611	0.337352	-0.139608	0.0211474	0.200484			25.4333	-0.249478	0.106002	0.224458	-0.159819	-0.243172	0.0170938	-0.25129
25.4667	0.0143611	0.0378996	0.38745	-0.525701	-0.388372	-0.338143	-0.0970978			25.4667	0.099234	0.376353	0.255717	-0.0770905	-0.197055	-0.0882435	0.330205			25.4667	-0.268824	0.333947	0.0601671	-0.0805784	-0.124909	0.0791932	0.225483			25.4667	-0.343147	0.0984389	0.157185	-0.108033	-0.320207	0.220136	0.0502267
25.5	-0.0411851	-0.0272447	0.0327385	-0.503221	-0.592375	-0.253599	-0.279026			25.5	0.24721	0.32774	0.467166	-0.0468181	-0.225769	-0.158746	0.501927			25.5	-0.0340232	0.186522	0.162599	0.131095	-0.069444	-0.0688619	0.0313033			25.5	-0.235224	0.297996	0.254464	-0.0939979	-0.13791	0.311284	-0.0872223
25.5333	0.00704585	-0.246358	-0.27746	-0.213193	-0.492988	-0.141277	0.148842			25.5333	0.192902	0.553981	0.447733	-0.0989982	-0.0675811	-0.192205	0.562609			25.5333	0.00293864	0.234308	0.266131	0.454276	-0.101887	0.00928007	0.172964			25.5333	-0.332384	0.144401	0.147506	-0.353409	-0.210241	0.247166	-0.187405
25.5667	-0.183867	0.123974	0.155162	-0.329157	-0.427089	-0.340558	-0.22849			25.5667	-0.00793326	0.380888	0.311202	-0.111744	-0.272755	0.157919	0.236773			25.5667	-0.0486848	0.197706	0.180166	0.00690749	-0.222392	-0.13567	0.335848			25.5667	-0.288458	0.261343	-0.0204337	-0.0872223	-0.107331	0.042867	-0.266777
25.6	-0.98051	-0.0800309	0.489486	-0.312217	-0.339094	-0.333312	-0.26555			25.6	0.107389	0.633021	0.437589	-0.0336736	-0.3093	0.0420075	0.325907			25.6	0.281229	-0.0574931	0.45789	-0.124027	-0.26257	-0.207652	0.4967			25.6	-0.194207	0.207817	-0.013174	-0.0688312	-0.18319	0.0334378	-0.16611
25.6333	0.00789439	0.165708	0.109167	-0.219264	-0.128676	-0.181133	-0.026348			25.6333	0.18813	0.595016	0.687955	-0.0368601	-0.117178	-0.0165457	0.445981			25.6333	-0.0668916	0.404101	0.287722	0.309345	-0.312394	0.0507291	0.512033			25.6333	-0.178789	0.300324	0.196871	-0.155947	-0.112035	0.0390953	-0.00155862
25.6667	-0.55622	-0.270477	0.16009	-0.479421	-0.384922	-0.41544	-0.110574			25.6667	0.216662	0.422702	0.298341	-0.187824	-0.00127806	0.200937	0.382032			25.6667	-0.00197144	0.087899	0.128949	0.116936	-0.216618	-0.0307719	0.016707			25.6667	-0.297767	0.104257	0.0352235	-0.0489882	-0.173781	0.125844	-0.172402
25.7	-0.698416	-0.108605	-0.282736	-0.358781	-0.559646	-0.246353	0.344246			25.7	0.0675945	0.417089	0.341196	-0.226859	0.0342228	0.0623219	-0.0340117			25.7	0.131973	-0.11748	0.273466	-0.150782	-0.337075	-0.024816	0.0276443			25.7	-0.291658	-0.094137	-0.106581	-0.25371	-0.249052	0.0724117	-0.126908
25.7333	-0.0962681	-0.220993	-0.132394	-0.416161	-0.380667	-0.435972	0.0140805			25.7333	0.311755	0.242414	0.268928	-0.121703	-0.323396	-0.107363	0.340537			25.7333	0.0021798	0.0777316	0.161735	-0.151422	-0.275406	0.178204	0.0766428			25.7333	-0.326275	0.118802	0.289311	-0.255646	-0.253169	0.0818409	0.0105408
25.7667	-0.0318065	-0.184214	0.238965	-0.144669	0.0075062	-0.479452	-0.383466			25.7667	0.134847	0.442426	0.499221	0.0125317	-0.350544	-0.0416399	0.583735			25.7667	0.194535	0.210923	0.0834261	-0.143542	-0.0415171	-0.0965569	0.155635			25.7667	-0.350711	0.4673	0.0671659	-0.236287	-0.103214	0.167332	-0.0441484
25.8	-0.67668	-0.127352	-0.144109	-0.396894	-0.25422	-0.15577	0.101675			25.8	0.0940906	0.183446	0.522568	-0.0233172	-0.114045	-0.286607	0.340074			25.8	-0.506092	0.167204	0.260475	-0.145441	-0.249002	-0.133167	0.183764			25.8	-0.289331	-0.038866	0.0463549	-0.0494722	-0.124384	-0.109886	-0.0199497
25.8333	-0.368462	-0.175473	-0.243642	-0.200921	-0.188503	-0.264469	-0.0836216			25.8333	-0.0909784	0.552135	0.29077	-0.0699208	-0.0926404	-0.0320802	0.406118			25.8333	-0.145864	0.426469	0.295633	-0.192663	-0.203861	-0.0126833	0.18748			25.8333	-0.290785	-0.00628518	0.00666894	-0.147235	-0.187894	0.0340664	-0.103193
25.8667	-0.856964	-0.316454	0.0329832	-0.355685	-0.527335	-0.092966	-0.0903598			25.8667	0.000886772	0.323048	0.101492	-0.237614	-0.184003	-0.133652	0.240959			25.8667	-0.290103	0.261759	0.458278	-0.230026	-0.183282	-0.189313	0.3476			25.8667	-0.262568	0.0198958	0.0565184	-0.327758	-0.171429	0.0786978	-0.108517
25.9	-0.801867	0.196238	-0.0816481	-0.408149	-0.854756	-0.346597	-0.0566694			25.9	0.0638477	0.302079	0.334045	-0.181849	-0.254483	-0.0834636	0.270915			25.9	-0.171418	0.15297	0.503427	-0.227044	-0.0766124	-0.353005	-0.047276			25.9	-0.271004	0.309051	0.249625	-0.146751	-0.250228	0.0931559	-0.180146
25.9333	0.185994	0.116021	-0.0327375	-0.532014	-0.307639	-0.17751	-0.386835			25.9333	0.0583771	0.443185	0.263455	0.0308545	-0.173561	-0.137237	0.296014			25.9333	-0.33722	0.0584139	0.309859	-0.169762	-0.0427988	-0.261043	0.116558			25.9333	-0.303585	-0.000467107	0.123791	-0.0998057	-0.361371	0.0416097	-0.183049
25.9667	-0.668763	-0.178882	0.209211	-0.173294	-0.551454	-0.211327	0.0174495			25.9667	0.370747	0.401004	0.177917	-0.164323	-0.0388671	-0.0284953	0.109342			25.9667	-0.153388	0.20889	0.160604	-0.184013	-0.0368926	0.0297643	0.578306			25.9667	-0.334711	-0.107518	0.103464	-0.0514081	-0.178485	0.000749999	-0.177242
26	-0.204183	0.460621	-0.156209	-0.363561	-0.652054	-0.450465	0.148842			26	-0.03474	0.413896	0.230729	-0.0416399	-0.220548	-0.0571744	-0.0408283			26	-0.0178054	0.0868823	0.371359	-0.155982	-0.0763434	0.146332	0.331994			26	-0.300676	-0.233769	0.146538	-0.169498	-0.129677	0.0793264	-0.120133
26.0333	-0.631373	0.08504	0.268956	-0.297753	-0.317345	-0.0796806	-0.134157			26.0333	0.28521	0.354049	0.267428	-0.283819	-0.0837652	-0.238809	0.149147			26.0333	0.0157839	0.335981	0.211571	-0.179576	-0.0315539	-0.119327	0.398927			26.0333	-0.377474	0.0082598	0.17364	-0.207732	-0.265518	0.191848	-0.0422125
26.0667	-0.351797	0.0312466	0.110611	-0.317112	-0.648464	-0.0386164	0.135366			26.0667	0.040249	0.275274	0.261327	-0.101388	-0.33697	0.160309	0.156895			26.0667	0.0179338	0.284127	0.369622	-0.205646	-0.183978	0.403299	0.578968			26.0667	-0.36642	-0.0522474	0.192999	-0.192245	-0.126148	0.113271	-0.0886742
26.1	-0.55584	-0.143139	-0.342367	-0.404579	-0.463438	-0.28017	0.15558			26.1	0.266039	0.202181	0.390834	0.00576023	-0.188702	-0.070319	0.210548			26.1	0.0225348	0.504757	0.487409	-0.172949	-0.095154	0.458191	0.269172			26.1	-0.218351	-0.0528291	0.131051	-0.353893	-0.118504	0.237108	-0.25613
26.1333	-0.365161	-0.124472	-0.0343129	-0.332979	-0.256745	-0.11229	-0.467692			26.1333	-0.0117624	0.347637	0.303431	0.0420074	-0.0733238	-0.0846586	0.318064			26.1333	0.159917	0.528142	0.147311	0.26852	-0.0676095	0.330854	0.561376			26.1333	-0.319875	-0.0313026	-0.033985	-0.0214017	-0.276103	0.0780692	-0.218864
26.1667	-0.751534	-0.0408783	0.182305	-0.35263	-0.650161	-0.167848	0.256651			26.1667	-0.0714708	0.371031	-8.61542e-06	-0.0591661	-0.202797	-0.110948	0.141424			26.1667	0.411993	0.148903	0.294758	0.0155823	0.0737243	0.207408	0.443666			26.1667	-0.261695	0.0664399	0.120403	-0.304527	-0.251404	0.135902	-0.387287
26.2	-0.530336	-0.00117056	0.152517	-0.346259	-0.1432	-0.326065	-0.01961			26.2	0.00807931	0.277222	0.0569803	-0.161534	-0.143803	0.0372276	-0.130272			26.2	-0.107366	0.219057	0.245029	-0.0634238	-0.0630383	-0.0708928	0.609316			26.2	-0.300967	0.0949481	0.323673	-0.328726	-0.279043	0.123958	-0.186921
26.2333	-0.205627	0.0257719	0.23613	-0.170861	-0.43947	-0.3937	-0.255443			26.2333	-0.329619	0.356356	0.363698	-0.165916	-0.474274	-0.274658	0.247196			26.2333	-0.214449	0.248542	0.435008	-0.0728131	0.0702952	0.0896824	0.404039			26.2333	-0.477253	0.146147	0.236073	-0.142879	-0.120268	-0.00553612	-0.153043
26.2667	-0.269442	-0.270697	0.0791811	-0.430724	-0.385383	-0.092966	-0.0634074			26.2667	0.251953	0.455604	0.237215	-0.105371	-0.361507	0.00257375	0.0896955			26.2667	-0.0876525	0.257692	0.43686	0.0712532	-0.110562	0.314438	0.678407			26.2667	-0.357402	0.0937845	0.044903	-0.260001	-0.26493	0.0548105	-0.0368889
26.3	-0.247603	-0.0270019	0.188112	-0.0288145	-0.5659	-0.456504	0.391413			26.3	-0.364152	0.377358	0.144618	-0.138432	-0.296248	-0.115728	0.186072			26.3	-0.20973	0.134668	0.0749678	-0.15018	-0.19141	0.0678259	0.289527			26.3	-0.425181	0.0111688	0.15041	-0.202408	-0.12262	0.24088	-0.216444
26.3333	-0.0125945	-0.216966	-0.395606	0.118849	-0.433121	-0.0567329	-0.275657			26.3333	-0.289616	0.535644	0.293143	-0.0527929	-0.0962949	-0.223274	0.0579239			26.3333	-0.0342829	0.107217	0.269711	-0.0465409	-0.144144	-0.0563249	0.0890516			26.3333	-0.37311	0.189781	0.121371	-0.25855	-0.464281	0.0705259	-0.0630235
26.3667	-0.503437	0.014133	0.196813	-0.43683	-0.482351	0.189652	0.0578779			26.3667	0.188017	0.230326	0.040862	-0.292184	-0.168341	0.254711	0.20768			26.3667	0.0256649	0.346148	0.271344	0.354337	-0.126165	0.00654725	0.370783			26.3667	-0.227951	0.213054	0.138794	-0.136104	-0.340789	0.110129	-0.227575
26.4	-0.486599	0.175739	0.560526	-0.386071	-0.163102	-0.118329	0.148842			26.4	-0.0564041	0.692186	0.455883	-0.183442	-0.142759	0.138799	0.0207725			26.4	-0.158715	0.43867	0.320953	-0.226399	-0.198909	-0.190082	0.273831			26.4	-0.231151	0.0390953	0.153313	-0.284684	-0.0497012	0.236479	-0.318079
26.4333	-0.521892	0.276074	-0.0246716	-0.347298	-0.354576	-0.264469	0.131997			26.4333	-0.263496	0.259732	0.34518	-0.118516	-0.119788	-0.103778	0.151739			26.4333	-0.103184	0.0096109	0.0735844	-0.031642	-0.240509	0.112353	0.175001			26.4333	-0.317839	0.274724	0.456282	-0.0388247	-0.184366	0.208192	0.045871
26.4667	-0.470679	-0.12589	0.319272	-0.366867	-0.485432	-0.0712261	0.0309256			26.4667	-0.258598	0.250616	0.173685	-0.134847	-0.104126	-0.0786838	0.304069			26.4667	-0.386451	0.0197782	0.042011	-0.182663	-0.257222	0.0981093	0.466684			26.4667	-0.125845	0.0164051	-0.0194658	-0.192245	-0.0773398	0.123329	-0.103677
26.5	-0.399424	-0.0952073	0.564837	-0.0956368	-0.468506	-0.31278	0.135366			26.5	-0.0062751	0.329681	0.195991	-0.306922	-0.15059	-0.0344701	-0.010979			26.5	-0.0513304	0.251592	0.34295	-0.0710554	0.164887	0.0143159	0.267392			26.5	-0.165989	0.23458	0.244785	-0.073187	0.0302744	0.183047	-0.123036
26.5333	-0.152598	-0.175595	0.146897	-0.0444951	-0.339065	0.227093	-0.16111			26.5333	0.101102	0.431579	0.20364	-0.133652	-0.162076	0.212887	0.0668713			26.5333	-0.12817	0.358349	0.194596	0.152342	-0.0774454	-0.0305576	0.5106			26.5333	-0.186643	0.194436	0.388042	-0.235803	-0.167901	0.310027	-0.229995
26.5667	-0.274982	0.387111	0.0515823	-0.328139	-0.155182	0.0567973	-0.151002			26.5667	-0.267966	0.194962	0.174995	-0.165518	-0.107781	-0.182645	-0.0220843			26.5667	-0.41294	-0.0625768	0.376773	0.0186881	-0.218864	-0.35808	0.138218			26.5667	-0.284677	0.283451	0.17848	0.0874929	0.0684981	0.159789	-0.00349454
26.6	-0.391692	0.135603	0.441389	-0.166042	-0.239519	-0.44805	-0.0398242			26.6	-0.227665	0.341106	0.404558	-0.0766922	-0.234122	0.28578	-0.119375			26.6	-0.291947	0.167204	0.250998	-0.0670914	-0.133056	0.283051	0.417984			26.6	-0.375728	0.246216	0.163961	-0.0935139	0.0602653	0.157274	-0.377124
26.6333	-0.155456	-0.153677	0.302283	-0.470039	-0.184338	-0.108667	-0.107205			26.6333	-0.213883	0.3445	-0.0203085	-0.286607	-0.114568	-0.0643442	0.269163			26.6333	-0.206839	0.431553	0.285016	0.108765	-0.295354	0.00923497	0.260691			26.6333	-0.202061	0.345122	0.0419991	-0.0770588	-0.113211	0.282997	-0.143364
26.6667	-0.448028	-0.251941	0.117728	-0.566151	-0.309312	-0.388869	-0.444109			26.6667	-0.158088	0.290992	0.136768	-0.109753	-0.153723	0.13163	-0.0498804			26.6667	-0.436171	-0.00970696	0.158638	-0.0619794	0.0505487	-0.0714161	0.405429			26.6667	-0.188679	0.423665	0.180416	-0.277909	-0.104979	0.084984	-0.184501
26.7	-0.135949	-0.398394	0.196279	-0.407793	-0.40969	-0.285001	0.26002			26.7	0.0558381	0.295167	0.287573	-0.266691	-0.00963111	-0.104973	0.106429			26.7	-0.318002	0.184488	0.207483	-0.243384	-0.186145	0.0858987	0.227976			26.7	-0.18548	0.0868029	0.124759	-0.09303	-0.22553	-0.156403	-0.16611
26.7333	0.0471123	0.231505	-0.303725	-0.276071	0.0770284	-0.0204999	-0.100467			26.7333	-0.300174	0.455203	0.434901	-0.116923	-0.229945	-0.20774	0.10064			26.7333	-0.340142	0.114334	0.385495	-0.218754	-0.284919	0.0924117	0.177191			26.7333	-0.399291	0.229926	0.191064	-0.131748	0.0296864	0.371002	-0.232415
26.7667	-0.480695	0.142344	0.00717966	-0.28361	-0.460564	-0.111083	0.0410328			26.7667	-0.0549082	0.385186	0.0913427	0.00854854	-0.251872	0.149554	-0.0205357			26.7667	-0.405056	0.216007	0.217605	-0.125638	0.131674	-0.016661	0.254821			26.7667	-0.328603	0.135674	0.0879768	-0.0673793	-0.14085	0.201277	-0.143847
26.8	0.211317	-0.242762	0.248854	-0.193458	-0.528052	-0.0748495	0.12189			26.8	-0.00744587	0.52048	0.308598	-0.196587	-0.117178	0.0240831	0.169257			26.8	-0.257841	0.0970495	0.294938	-0.14693	-0.216171	0.10583	0.0799376			26.8	-0.308821	0.11822	0.111692	-0.16369	-0.269634	0.362202	-0.378092
26.8333	-0.503434	-0.0104328	0.152825	-0.424165	-0.25569	-0.178718	-0.36999			26.8333	-0.0756102	0.435034	0.457378	-0.135644	-0.229945	0.180623	0.383452			26.8333	-0.179435	0.104167	0.394257	-0.0302196	-0.0127889	0.151926	0.231735			26.8333	-0.399	0.200254	-0.0122061	-0.211604	-0.18613	0.164189	-0.340825
26.8667	-0.195501	-0.275587	0.00365521	-0.324671	-0.44889	0.00848654	0.310556			26.8667	0.151698	0.499118	0.0144418	-0.124889	-0.28163	-0.0894384	0.144449			26.8667	-0.169811	0.0228283	0.315879	-0.162591	-0.160653	0.158814	0.469399			26.8667	-0.375146	0.193272	0.240429	-0.272585	-0.249052	-0.0853698	-0.21354
26.9	-0.764715	0.408692	0.159603	-0.384492	-0.163262	-0.0132533	0.064616			26.9	0.16498	0.437833	0.325402	-0.104575	-0.256049	0.128045	0.326772			26.9	-0.359754	0.210923	0.2669	0.00718008	-0.0606948	-0.0986047	0.375818			26.9	-0.274786	0.0321136	-0.0576998	-0.239191	-0.226706	0.0466387	-0.0697992
26.9333	-0.376061	0.364291	-0.195127	-0.271711	-0.0823113	-0.219782	0.165687			26.9333	0.055439	0.646058	0.303382	0.01532	-0.0487865	-0.0523945	0.199966			26.9333	0.144372	0.291245	0.352015	-0.119279	-0.22223	-0.276033	0.0532392			26.9333	-0.20817	-0.134863	-0.121101	-0.13078	-0.05911	0.119558	-0.317595
26.9667	-0.245586	0.151852	0.0505339	-0.362408	-0.611605	-0.19925	0.0511399			26.9667	-0.188411	0.474552	0.237147	-0.00857931	-0.159466	-0.169501	0.168762			26.9667	0.0983929	0.183471	0.101571	-0.0307321	-0.278754	0.137633	0.175658			26.9667	-0.439435	0.105421	0.128631	-0.129328	-0.172605	0.0453814	-0.258066
27	-0.00166559	0.0592911	-0.194022	-0.534623	-0.392726	-0.217366	-0.00613381			27	0.215746	0.53785	0.352019	-0.143212	-0.349499	0.0826362	0.164135			27	0.988758	-0.119514	0.0915562	0.0928845	-0.00347873	-0.0155841	0.054339			27	-0.205552	0.0996025	0.192999	-0.0460844	-0.05911	0.0258945	-0.171434
27.0333	-0.396192	0.261609	0.0276524	-0.271378	-0.263538	0.0797449	-0.450847			27.0333	-0.139723	0.54898	0.205552	-0.131262	-0.283196	0.215277	0.134708			27.0333	1.24803	0.134668	0.366433	-0.118947	-0.265773	0.449126	0.337422			27.0333	-0.387946	0.183382	0.124759	-0.0683472	-0.156727	0.146588	-0.0262414
27.0667	-0.536896	0.132254	0.138392	-0.490653	-0.503585	0.00969434	0.404889			27.0667	-0.00895316	0.507981	0.237003	-0.175077	-0.289983	0.0826362	0.220743			27.0667	0.664824	0.259726	0.519519	-0.0759107	-0.0289012	0.352294	0.230394			27.0667	-0.289622	0.288688	0.0763614	-0.236287	-0.204948	-0.0313092	-0.252258
27.1	-0.356417	0.147425	0.187485	-0.549682	-0.232724	-0.190795	-0.107205			27.1	-0.0389983	0.333705	0.254105	-0.122499	-0.129708	0.0169133	0.319256			27.1	0.900832	0.193639	0.390601	-0.0379544	0.160534	0.155733	0.413781			27.1	-0.305331	0.120547	0.0894287	-0.197085	-0.168489	0.121443	-0.308399
27.1333	-0.659206	-0.112826	-0.27581	-0.057576	-0.20406	0.176366	0.064616			27.1333	0.00195037	0.545565	0.453023	0.0467872	-0.123965	-0.103778	0.976436			27.1333	0.60681	0.439687	0.346546	-0.021619	-0.123322	0.577692	0.190093			27.1333	-0.286422	0.0443314	0.175576	-0.275973	-0.283748	0.135902	-0.108033
27.1667	-0.187396	0.0371429	0.118194	-0.412081	-0.0942399	-0.351428	-0.346407			27.1667	-0.307569	0.569018	0.853691	-0.0950149	0.0394435	-0.0774888	0.594402			27.1667	0.0564762	0.524075	0.657319	0.252192	0.0491407	0.684683	0.181816			27.1667	-0.21806	0.0652763	0.160089	-0.14046	-0.117328	0.151617	-0.195633
27.2	-0.449136	0.161573	0.276844	-0.0412996	-0.579643	-0.403362	0.0747232			27.2	-0.395792	0.367886	0.868954	-0.126482	-0.0915963	0.0981707	0.383045			27.2	0.598723	0.314629	0.701601	0.0723426	0.0187014	0.179591	0.253736			27.2	-0.345766	-0.0417749	0.280115	-0.236287	-0.120856	0.173618	-0.000106711
27.2333	0.644393	-0.0373793	0.236914	-0.238532	-0.152058	0.11477	0.516067			27.2333	-0.136943	0.515723	0.81577	-0.10816	-0.127097	0.0336428	0.43404			27.2333	2.19646	0.072648	0.271847	-0.156562	-0.0305311	0.407987	0.271598			27.2333	-0.201188	0.103675	0.0937845	-0.120617	-0.271398	0.0661256	-0.05286
27.2667	0.295746	0.133737	0.248108	-0.368858	-0.324418	-0.189587	-0.380097			27.2667	0.220162	0.620265	0.819542	0.0523638	-0.201231	-0.03925	0.629506			27.2667	1.32213	0.301412	0.346581	0.0941838	-0.0347842	0.397463	0.101507			27.2667	-0.396673	0.219453	0.14315	-0.0993217	-0.0914532	0.20002	-0.0257574
27.3	-0.357421	0.258575	0.41111	-0.0872894	-0.551695	-0.0760572	0.142104			27.3	-0.251714	0.254082	1.04121	-0.0468181	-0.268056	0.160309	0.614469			27.3	1.03009	0.327847	0.466367	0.00297534	-0.118725	0.532279	0.370307			27.3	-0.309694	0.0338591	-0.0126901	-0.186921	-0.0826324	0.0944131	-0.101742
27.3333	-0.00270789	0.326877	-0.0574464	-0.225141	-0.320791	0.0241875	-0.238597			27.3333	0.0167674	0.586463	0.55617	-0.112939	-0.228901	-0.0237155	0.238532			27.3333	1.24558	0.105183	0.254222	-0.1849	-0.0607516	0.0958798	0.389552			27.3333	-0.0993732	0.109493	0.135406	-0.254678	-0.0338237	-0.0501675	-0.0296292
27.3667	-0.112285	0.367731	0.103602	-0.230801	-0.200326	-0.0265387	-0.127419			27.3667	-0.272597	0.613243	0.745373	-0.153568	0.013862	0.345528	0.416855			27.3667	1.27628	0.230241	0.341168	-0.160747	-0.0412796	-0.0948855	0.429953			27.3667	-0.297476	0.339886	-0.109485	-0.117713	-0.144378	0.0409811	-0.156915
27.4	-0.327324	-0.100901	-0.432709	-0.223675	-0.317236	0.0592129	0.381306			27.4	-0.0521315	0.74526	0.614261	-0.124491	-0.185047	0.11729	0.600944			27.4	1.49932	0.394951	0.394928	0.0463319	-0.0769616	0.592371	0.45704			27.4	-0.244532	-0.0144303	0.121855	-0.16369	-0.281983	0.255338	-0.224187
27.4333	-0.0330668	0.027048	-0.113408	-0.680385	0.00257597	0.171535	-0.231859			27.4333	-0.0381419	0.390526	0.520889	-0.140025	-0.358375	0.202132	0.752885			27.4333	1.57678	0.318696	0.523424	0.191552	0.000713409	0.573148	0.395017			27.4333	-0.145335	0.407375	0.102012	-0.221768	-0.198479	0.345229	-0.217896
27.4667	-0.274604	0.0490969	0.386455	-0.304715	-0.541037	-0.140069	0.590186			27.4667	0.17268	0.764795	0.314531	-0.122499	-0.244041	0.0527621	0.159562			27.4667	1.76415	0.524075	0.449636	0.0119177	-0.0884176	0.0788898	0.563107			27.4667	-0.207588	0.0850575	0.14073	-0.0639915	-0.297861	0.342086	-0.187889
27.5	-0.16401	0.0137992	-0.24557	-0.313331	-0.186765	0.00607106	0.101675			27.5	0.0921181	0.701949	0.343578	-0.211723	-0.177216	-0.0930233	0.342371			27.5	1.57485	0.240408	0.301621	0.185028	-0.0784427	0.167794	0.310219			27.5	-0.333548	0.388757	0.17606	-0.144815	-0.14673	0.147845	-0.171434
27.5333	-0.341558	0.0940159	-0.00871961	-0.388814	-0.031594	-0.224613	-0.346407			27.5333	0.303535	0.421049	0.574071	-0.0607593	-0.304601	0.243956	0.856931			27.5333	1.39412	0.251592	0.226202	-0.0577787	-0.213173	-0.0203826	0.519649			27.5333	-0.177043	0.275306	0.237041	-0.201925	-0.231411	0.565872	-0.14046
27.5667	-0.31457	-0.157583	-0.196238	-0.370892	-0.439016	-0.0748495	0.212854			27.5667	-0.0621543	0.58806	0.344006	-0.0962099	-0.101516	-0.122897	0.45512			27.5667	1.77936	0.618631	0.55288	0.066839	-0.0521469	0.160472	0.290415			27.5667	-0.169771	0.135674	-0.00397854	-0.0906101	-0.193187	0.168589	-0.182565
27.6	0.0488771	0.367876	-0.0416183	-0.265001	0.251569	0.064044	-0.430633			27.6	-0.44033	0.596546	0.114825	-0.134449	-0.100472	0.11251	0.00917542			27.6	0.701139	0.213973	0.483731	-0.00151436	-0.118404	-0.0416285	0.000490234			27.6	-0.251514	0.139165	0.313993	-0.216444	-0.142614	0.181162	-0.209668
27.6333	0.370165	-0.167851	-0.0343462	-0.420177	-0.390999	-0.195626	-0.0937288			27.6333	-0.403353	0.6983	0.283032	-0.128872	-0.255005	0.025278	0.432724			27.6333	0.607236	0.220074	0.226357	0.0662198	-0.217505	0.347087	0.18667			27.6333	-0.282349	0.0658581	-0.155463	-0.0630235	-0.116152	0.180533	-0.303559
27.6667	0.379033	-0.0476157	0.143646	-0.352919	-0.45844	-0.107459	-0.0398242			27.6667	0.165946	0.432244	0.283623	-0.018139	-0.226813	0.0455924	0.0838565			27.6667	1.17242	0.0401127	0.430554	0.190422	-0.129262	0.269366	0.371025			27.6667	-0.323366	-0.00919411	0.00570093	0.0502267	-0.117328	0.247166	-0.0780268
27.7	-0.11965	-0.208906	0.426418	-0.278487	-0.315868	0.194483	-0.346407			27.7	0.092185	0.290151	0.438009	-0.116524	-0.133362	-0.0954133	0.1936			27.7	1.11509	0.59728	0.140817	-0.0560893	-0.00937502	0.0621216	0.457676			27.7	-0.213406	0.141492	0.234137	-0.107549	-0.0638145	-0.0727976	-0.265809
27.7333	-0.530176	-0.180744	-0.509931	-0.277531	-0.0346266	-0.108667	0.283603			27.7333	0.238718	0.401912	0.50502	-0.0384534	-0.0874197	-0.0631493	0.501777			27.7333	1.51307	0.26786	0.249391	0.183845	-0.0784315	-0.0175622	0.30754			27.7333	-0.272168	0.261343	0.0361915	-0.17095	-0.0667548	0.166704	-0.165626
27.7667	-0.422688	0.178983	0.500033	-0.358182	-0.255156	-0.434764	-0.326192			27.7667	-0.136246	0.201023	0.193931	-0.0368601	-0.141193	0.0384226	0.574025			27.7667	1.57077	0.613547	0.0993052	0.503981	-0.146686	0.145304	0.356912			27.7667	-0.385037	0.282288	0.152346	-0.356797	-0.0297073	0.0453814	-0.137072
27.8	-0.0755118	-0.266769	0.126054	-0.134555	-0.525485	-0.0748495	-0.022979			27.8	0.144372	0.376972	0.303794	-0.198977	0.0749444	0.0121335	0.412639			27.8	1.73469	0.575928	0.271717	-0.0015294	-0.207768	-0.0672832	0.137846			27.8	-0.340238	0.128693	0.133954	-0.13078	-0.210829	-0.0828554	-0.167562
27.8333	-0.842233	-0.064051	0.0624428	-0.120884	-0.0482959	-0.0386164	-0.151002			27.8333	0.199915	0.388401	0.285567	0.0256763	-0.344279	-0.262708	0.466098			27.8333	1.88718	0.465105	0.584803	0.141288	-0.186155	0.331026	0.184814			27.8333	-0.286713	0.295087	0.10056	-0.251774	-0.163784	0.108871	-0.215476
27.8667	-0.30019	0.128635	0.20322	-0.107795	-0.213369	-0.42631	0.0107114			27.8667	0.148399	0.369021	0.5602	-0.0802771	-0.115612	-0.040445	0.446389			27.8667	2.0224	0.442737	0.59557	0.118751	-0.0859873	0.0857698	0.131739			27.8667	-0.247732	0.243307	0.194935	-0.155947	-0.377837	0.428206	-0.0238215
27.9	-0.128394	0.369086	-0.340382	-0.250826	-0.542235	-0.10142	0.0949373			27.9	-0.148873	0.479837	0.376434	0.0392192	-0.0284257	0.155529	0.581015			27.9	1.86834	0.365466	0.359515	-0.00741884	-0.187895	0.133191	0.209241			27.9	-0.224169	0.256107	0.174124	0.0715217	-0.257285	0.0535534	-0.0901261
27.9333	0.348232	0.0329766	0.291494	-0.172364	-0.0909066	0.00848654	-0.026348			27.9333	-0.166757	0.271067	0.168841	-0.00101118	-0.0346906	-0.040445	0.527386			27.9333	2.7073	0.578979	0.435361	0.128525	-0.062497	0.444774	0.453623			27.9333	-0.289622	-0.099955	0.144602	-0.154011	-0.215533	0.168589	-0.345181
27.9667	0.0936789	0.0706709	-0.098504	-0.120088	-0.697751	-0.0192921	0.371198			27.9667	0.0780207	0.138698	0.369946	-0.144805	-0.153723	-0.106168	0.587025			27.9667	2.64365	0.614564	0.145764	0.258266	-0.113482	0.3717	0.199859			27.9667	-0.354493	0.196181	0.21623	-0.0693152	-0.181426	0.222021	-0.342277
28	-0.601439	-0.0314812	-0.0672317	-0.353315	0.00481759	-0.248768	-0.457585			28	0.526028	0.419903	0.499202	-0.0699208	0.0122958	-0.245978	0.559718			28	2.4474	0.330897	0.413422	-0.0558273	-0.347497	0.133331	0.267589			28	-0.214279	0.296251	0.101528	-0.146267	0.0743786	0.108871	-0.0112382
28.0333	-0.608421	-0.32208	0.183566	-0.394824	-0.461686	-0.193211	-0.029717			28.0333	-0.0471944	0.307771	0.302739	-0.206545	-0.264402	-0.223274	0.207078			28.0333	2.08101	0.327847	0.331586	0.0299293	-0.0914666	-0.0857754	0.0878573			28.0333	-0.254714	0.0216413	-0.0373728	-0.170466	-0.253757	0.222021	-0.127392
28.0667	0.0757253	-0.0875994	0.265087	-0.309143	-0.643947	-0.369545	-0.305978			28.0667	0.460046	0.438613	0.276233	-0.223673	-0.134406	0.0300579	0.153088			28.0667	1.66579	0.634899	0.301868	0.124143	-0.170054	0.102763	0.221178			28.0667	-0.331221	-0.102864	-0.0581838	-0.139492	-0.285512	0.0830981	0.0478069
28.1	-0.365587	0.416114	-0.198004	-0.105729	-0.370116	-0.148523	-0.390204			28.1	0.195375	0.390605	0.291154	-0.0743022	-0.288417	0.0228881	0.616809			28.1	1.17239	0.257692	0.694118	0.0819673	0.047014	0.249704	0.133848			28.1	-0.386492	0.310214	0.250592	-0.0852864	-0.0455848	0.423806	0.0584544
28.1333	-0.513493	-0.233171	-0.292134	-0.269936	-0.5124	-0.147315	-0.0667765			28.1333	-0.185875	0.334561	0.320526	-0.0866502	-0.304601	-0.199375	0.230882			28.1333	0.708928	0.412235	0.317782	-0.130348	0.0479876	0.498288	0.414739			28.1333	-0.424309	0.0390953	0.0279638	-0.0654434	-0.223178	0.0780692	-0.219348
28.1667	0.29785	0.373904	0.386034	-0.52583	-0.356333	-0.222197	-0.140895			28.1667	0.209557	0.221901	0.250803	-0.00101118	-0.141193	-0.0452248	0.325805			28.1667	0.51213	0.101116	0.344359	0.172255	-0.206601	0.522376	0.275349			28.1667	-0.34082	0.0617854	0.103948	-0.219832	-0.271987	-0.0778265	-0.0155939
28.2	0.846345	-0.291344	0.488887	-0.162725	-0.263543	-0.160601	-0.487906			28.2	-0.0993217	0.397085	0.50523	-0.174679	-0.0931625	0.180623	0.484402			28.2	0.198388	0.349198	0.725919	0.28222	0.0365122	0.688945	0.205221			28.2	-0.349838	-0.0423568	0.043935	-0.129812	0.000871626	0.260995	-0.0688312
28.2333	0.962386	-0.00276076	-0.12658	-0.478948	-0.194056	-0.283793	0.118521			28.2333	0.349638	0.441438	0.236517	-0.139229	-0.245607	-0.112143	0.189445			28.2333	0.329445	0.308529	0.537269	0.158686	-0.00644754	0.0689123	0.422798			28.2333	-0.249187	0.106002	0.130567	-0.0785107	-0.2467	0.0390953	-0.290492
28.2667	0.570797	-0.22446	0.652397	-0.258152	-0.167375	-0.159393	-0.29924			28.2667	-0.0357924	0.605124	0.426905	-0.216503	-0.224724	0.145969	0.587508			28.2667	0.945138	0.182455	0.390051	-0.141048	-0.11479	0.327956	0.295078			28.2667	-0.233478	0.183964	0.126211	-0.092546	-0.320207	0.211335	-0.0378568
28.3	0.170932	-0.359351	0.425446	-0.391826	-0.326904	-0.403362	0.135366			28.3	0.187772	0.49861	0.682349	-0.0364618	-0.129185	0.116095	0.588664			28.3	0.968982	0.357332	0.312634	-0.0783346	0.0218193	0.454854	0.256365			28.3	-0.30184	0.0751669	0.0787813	-0.377124	-0.236703	0.135902	0.0763614
28.3333	0.366927	0.107298	0.365423	-0.35112	-0.0729312	-0.206496	-0.29924			28.3333	0.4221	0.585532	0.724561	-0.018139	-0.0138077	-0.176671	0.605647			28.3333	0.470391	0.26481	0.43596	-0.00691125	-0.0849839	0.362602	0.303639			28.3333	-0.233478	0.293342	0.0976564	-0.287588	-0.196715	0.147845	-0.0804466
28.3667	0.576041	-0.0388579	0.107303	-0.311087	-0.469239	-0.100213	0.0814612			28.3667	0.225559	0.477595	0.340284	0.0854244	-0.060272	-0.113338	0.359847			28.3667	0.396753	0.318696	0.617024	0.0037208	-0.121999	0.31682	0.148089			28.3667	-0.360892	0.203163	0.214778	-0.100774	-0.417236	0.202534	-0.145783
28.4	0.348934	0.106109	0.199821	-0.138899	-0.242332	-0.0941737	0.196008			28.4	0.0765654	0.263539	0.299088	0.0420074	-0.191312	-0.0978031	0.447675			28.4	0.543234	0.1062	0.168197	-0.0829214	-0.0843701	0.0256928	0.360562			28.4	-0.376601	-0.0155939	0.303346	-0.204344	-0.120268	0.190591	-0.311787
28.4333	0.153352	-0.211836	-0.0499356	-0.353887	-0.152693	-0.164224	-0.184693			28.4333	-0.0055831	0.402606	0.583449	-0.109753	-0.0498306	0.0169133	0.302517			28.4333	0.401756	0.130602	0.361131	0.00680568	-0.0625295	0.0946571	0.447201			28.4333	-0.292531	0.103093	-0.0301133	-0.259034	-0.0885129	0.142188	-0.236287
28.4667	-0.270691	0.208582	0.380474	-0.522918	-0.0767302	-0.213743	0.697995			28.4667	-0.0840172	0.432935	0.590946	-0.215706	-0.141715	-0.0571745	0.64101			28.4667	0.313566	-0.00258978	0.466613	0.200307	-0.097268	0.304459	0.182294			28.4667	-0.145917	0.112402	0.0933005	-0.0364049	-0.248464	0.0453814	0.0308677
28.5	-0.291411	-0.226057	-0.02478	-0.445636	-0.203573	-0.0990048	-0.00613381			28.5	0.0736218	0.370277	0.5958	-0.167111	-0.182437	0.130435	0.380583			28.5	0.747993	0.0533301	0.451046	-0.0730234	0.0530872	0.447512	0.45336			28.5	-0.261114	0.0617854	0.0681338	-0.0281773	-0.0679309	0.42192	-0.206764
28.5333	1.16094	0.163749	0.0683687	-0.0731159	-0.120818	0.379271	0.064616			28.5333	-0.15809	0.671414	0.635881	-0.240004	-0.283718	-0.0798787	0.395829			28.5333	0.715492	0.590163	0.214112	0.26175	-0.196918	0.336218	0.516634			28.5333	-0.160171	0.244471	0.119919	-0.350021	-0.0297073	0.321971	-0.0944819
28.5667	-0.518142	0.142788	0.591641	0.0822725	-0.161482	-0.305533	-0.326192			28.5667	0.144176	0.506919	0.758495	0.0316511	-0.133362	-0.118118	1.10033			28.5667	0.466239	0.0401127	0.0698763	0.210583	-0.109516	0.116322	0.241578			28.5667	-0.23726	0.385266	0.54001	-0.0543119	0.00675218	0.303741	-0.158851
28.6	-0.731921	-0.305711	0.294778	-0.334444	-0.263049	0.2283	0.418365			28.6	0.115138	0.471764	0.839922	-0.25753	-0.259181	0.00137877	2.27198			28.6	0.856436	0.127551	0.488523	0.27036	-0.208385	0.130326	0.369808			28.6	-0.26315	0.34105	0.33674	-0.118681	-0.15908	0.0887557	-0.0412446
28.6333	-0.0852867	0.0864614	0.666446	0.0242557	-0.184777	-0.127991	-0.0533004			28.6333	0.23717	0.700355	0.740633	0.0113368	-0.115612	-0.0786838	1.19385			28.6333	0.666086	0.535259	0.39435	-0.0737332	0.000792664	0.321244	0.381761			28.6333	-0.207006	0.206072	0.143634	-0.0654434	-0.237879	0.20442	-0.0330171
28.6667	0.24047	0.0945983	0.34604	-0.346216	-0.487621	0.0410963	0.246544			28.6667	-0.0903745	0.567109	0.474881	0.0754664	-0.140149	0.320434	0.98678			28.6667	0.217395	0.0126611	0.503729	0.384617	-0.132945	0.0578943	0.251914			28.6667	-0.257914	0.00651446	0.177996	0.0236081	-0.330792	0.0755547	-0.0155939
28.7	0.420456	0.173086	-0.0572856	-0.173631	-0.221365	-0.294663	-0.12405			28.7	-0.0377046	0.612691	0.26318	-0.162729	-0.244563	0.0181083	0.895141			28.7	0.322762	0.0665477	0.385862	0.0153592	-0.257104	-0.103509	0.125162			28.7	-0.258786	-0.047593	0.177996	-0.245966	-0.229646	0.120815	-0.136588
28.7333	-0.34291	-0.0630617	0.596085	-0.403628	-0.222908	0.00365545	-0.268919			28.7333	0.212193	0.52015	0.567019	-0.243987	-0.179826	-0.0727089	1.67453			28.7333	0.361348	0.260743	0.30792	0.186411	-0.0638079	-0.0859869	-0.0202558			28.7333	-0.293404	0.112984	0.148958	-0.193213	-0.0432326	0.196248	-0.172402
28.7667	0.398684	0.15393	0.249089	-0.406488	-0.51751	-0.00962994	0.131997			28.7667	0.15833	0.341856	0.428159	-0.250758	-0.015896	-0.176671	1.64868			28.7667	0.754156	0.281077	0.443981	-0.135813	-0.0648446	0.0930576	0.686801			28.7667	-0.183443	0.188618	0.238977	-0.245482	-0.0632265	0.149731	-0.270165
28.8	-0.0601262	0.377854	0.892082	-0.0385869	0.0521868	-0.243937	-0.0903598			28.8	0.209099	0.638	0.514207	0.0208965	-0.252916	0.139994	0.545694			28.8	0.0998343	0.248542	0.398331	-0.178863	-0.16538	-0.0619097	0.178145			28.8	-0.336166	0.158946	0.0347396	-0.140944	-0.0949815	0.0623539	-0.343729
28.8333	0.47471	-0.172802	0.366188	-0.531473	-0.497351	-0.368337	-0.231859			28.8333	0.144697	0.394735	0.676899	-0.24319	-0.293116	0.169869	0.429044			28.8333	-0.0740271	0.0919659	0.167915	-0.0753024	-0.0469468	0.331193	0.293455			28.8333	-0.328021	0.0105871	0.025544	-0.0964179	-0.258461	-0.0137081	-0.103677
28.8667	-0.293374	0.492056	0.589487	-0.344303	0.166622	-0.264469	-0.01961			28.8667	-0.0736085	0.742649	0.561015	0.088611	-0.265446	0.169869	1.10837			28.8667	0.307993	0.163137	0.285863	0.121998	-0.282528	-0.192558	0.120128			28.8667	-0.235514	0.0594582	0.0628101	-0.126908	-0.0638146	0.1183	-0.137072
28.9	-0.24346	-0.123052	0.230861	-0.178321	-0.0405589	-0.211327	0.064616			28.9	0.17106	0.420359	0.369178	-0.0121642	-0.246651	-0.241199	1.18681			28.9	-0.0553597	0.0523134	0.392316	0.02139	-0.120872	0.0762752	0.317838			28.9	-0.165408	0.268906	0.235589	-0.157399	-0.232587	0.0441242	-0.152075
28.9333	-0.0103546	-0.00275557	0.498288	-0.46989	0.447096	0.0990692	-0.22849			28.9333	0.270221	0.540737	0.410664	-0.163924	-0.169385	0.193768	1.11577			28.9333	0.188633	0.0675644	0.600906	-0.0829515	-0.377271	-0.0117632	0.372134			28.9333	-0.351002	0.239816	-0.0770588	-0.261937	-0.265518	-0.111772	-0.00204263
28.9667	-0.122415	0.00123277	0.303506	-0.204667	0.142621	-0.379207	0.138735			28.9667	-0.0477948	0.434356	0.223961	-0.0978032	-0.00180011	0.0587369	0.92276			28.9667	-0.00659975	0.161103	0.34159	0.0344995	0.0189858	0.156216	0.228674			28.9667	-0.410055	0.165928	-0.0296292	-0.139976	-0.258461	-0.0174798	0.11266
29	0.0456771	0.0728355	0.165946	-0.193758	-0.488075	3.21714e-05	0.0511399			29	0.179474	0.215504	0.416179	-0.208935	-0.138061	-0.125287	1.38101			29	-0.100696	0.0980662	-0.105773	-0.273154	-0.0818001	-0.160334	0.438725			29	-0.310276	0.11182	0.184288	-0.115777	-0.264342	0.0874984	0.00424902
29.0333	-0.243854	0.0725952	0.0487437	-0.236107	-0.236702	-0.140069	-0.295871			29.0333	0.141485	0.480967	0.581118	-0.155958	-0.250828	-0.167111	0.588947			29.0333	0.098998	-0.100196	0.527104	-0.0812724	-0.148055	0.00180441	0.530438			29.0333	-0.385037	0.414938	0.197839	-0.304043	-0.28316	0.122701	-0.124972
29.0667	-0.229309	-0.105874	0.141389	-0.233108	-0.345728	-0.00600665	0.320663			29.0667	-0.124908	0.344568	0.366008	-0.0432332	-0.213761	0.0121334	0.542139			29.0667	0.189714	-0.0900284	-0.0160068	-0.133219	-0.0902943	0.160447	0.164463			29.0667	-0.245696	-0.094137	-0.0601197	-0.107549	-0.291392	0.303112	-0.269681
29.1	-0.357853	0.0770685	0.480426	0.128255	-0.254209	-0.190795	0.192639			29.1	0.336756	0.41495	0.183447	-0.317676	-0.174606	0.156724	0.296847			29.1	-0.23221	0.230241	0.332774	-0.081801	-0.233179	-0.0719234	0.420508			29.1	-0.332384	0.0705124	-0.0383408	-0.233383	-0.172605	-0.0916559	-0.289524
29.1333	-0.182245	-0.11636	0.447186	-0.0705718	-0.0893425	0.205353	-0.0634074			29.1333	-0.219475	0.46071	0.521992	-0.0257071	-0.253438	0.148359	0.677835			29.1333	0.0867544	0.0594306	0.0945708	0.0852182	-0.112173	0.0543378	0.200514			29.1333	-0.0839555	0.225271	0.204615	-0.0944819	-0.0314715	0.0774406	-0.189825
29.1667	-0.141729	0.298695	0.356842	-0.380792	-0.452148	-0.305533	-0.016241			29.1667	0.0871473	0.265461	0.550528	-0.142415	-0.174606	-0.164721	0.528395			29.1667	-0.166738	0.251592	0.089114	-0.0875744	-0.169118	0.0065604	0.386499			29.1667	-0.178207	-0.0237392	0.178964	-0.184501	-0.100862	0.110129	-0.105613
29.2	0.0662906	-0.310481	0.162178	-0.341043	-0.274329	-0.167848	0.0107114			29.2	0.00932978	0.100402	0.400781	-0.121304	-0.202275	-0.219689	0.833337			29.2	-0.108387	0.283111	0.153312	-0.19078	-0.185238	0.423121	0.174973			29.2	-0.284967	0.149637	0.209939	0.00424902	-0.127913	0.190591	-0.240158
29.2333	-0.56019	0.0563987	0.471866	-0.116783	-0.215207	-0.179925	-0.151002			29.2333	-0.028215	0.438419	0.320503	-0.217698	-0.215849	-0.142017	0.412906			29.2333	0.0483264	0.0950161	0.232595	-0.125251	0.0585655	0.0895236	0.199073			29.2333	-0.340238	0.25378	0.166381	-0.212572	-0.104979	0.156646	-0.174822
29.2667	-0.403485	-0.133476	0.486315	-0.391835	-0.344774	0.0724983	-0.208276			29.2667	-0.168138	0.381625	0.15649	-0.102583	-0.166774	0.0921959	0.336538			29.2667	-0.174514	0.258709	0.156167	0.0592303	0.0668029	0.476497	0.105586			29.2667	-0.33762	0.236326	0.176544	-0.0523761	-0.282571	0.0661256	-0.132716
29.3	-0.514434	-0.16676	0.13771	-0.18052	-0.167197	-0.11229	-0.0465622			29.3	-0.339583	0.331548	0.247771	-0.232037	-0.293638	-0.109753	0.189736			29.3	0.143776	0.77419	0.554721	0.110088	0.0771491	0.280481	0.279348			29.3	-0.284677	0.109493	0.0802332	0.0274799	-0.20142	0.0434956	-0.121585
29.3333	0.21489	0.0177782	0.425057	-0.262965	-0.128012	-0.0748495	-0.238597			29.3333	0.336165	0.323698	0.17292	-0.130466	-0.299903	-0.0428348	0.574944			29.3333	0.0480248	0.27091	0.29872	0.111652	-0.264746	-0.088091	0.049503			29.3333	-0.385619	0.364903	0.342064	-0.241126	-0.130265	-0.0181084	-0.141428
29.3667	-0.641693	0.555286	0.0181683	-0.334798	-0.520941	-0.0410319	0.0342946			29.3667	-0.186755	0.246929	0.442221	-0.182645	-0.128141	-0.0308852	0.403559			29.3667	-0.221526	-0.166283	0.374689	-0.151531	-0.196035	-0.108174	0.205203			29.3667	-0.259077	0.101348	0.11024	-0.118681	-0.14673	-0.106114	-0.0184978
29.4	0.71623	0.015959	0.385496	-0.245721	0.0266146	-0.0627718	-0.0398242			29.4	0.0458028	0.414589	0.259452	-0.190214	-0.226813	-0.128872	-0.0501231			29.4	-0.000367427	0.139752	0.390431	-0.103344	0.0237877	0.15949	0.582541			29.4	-0.332675	0.0949481	0.182352	-0.0901261	-0.0414684	0.0453814	-0.195633
29.4333	-0.291972	0.356089	0.401496	-0.317811	-0.351552	0.0241875	-0.272288			29.4333	-0.262414	0.653345	0.325086	-0.0555811	-0.238298	0.089806	0.283089			29.4333	0.0330172	0.333947	0.262204	0.0093413	-0.0610849	0.271182	0.456119			29.4333	-0.23726	0.19909	0.38417	-0.0659274	-0.141438	0.528784	-0.118681
29.4667	-0.379837	-0.0216813	0.263856	-0.0983095	-0.486189	-0.237898	0.00397332			29.4667	-0.0873756	0.439324	0.272174	-0.167509	-0.271189	-0.130067	0.151895			29.4667	-0.0432155	-0.0727441	0.669976	0.094649	-0.131046	-0.0204938	-0.0417804			29.4667	-0.197988	0.124038	0.182836	-0.17821	-0.0320595	0.161046	-0.0760909
29.5	-0.595283	-0.239463	0.201313	0.138991	-0.0888035	-0.0446553	-0.322823			29.5	0.194006	0.61182	0.355699	-0.128872	-0.255005	-0.167111	0.0146857			29.5	-0.304012	0.0604473	0.284123	-0.0636461	-0.0370092	-0.287116	0.200561			29.5	-0.249187	0.107748	0.333352	-0.104645	-0.329028	0.393004	-0.245966
29.5333	-0.563317	0.28753	0.0308478	-0.289328	-0.0432558	-0.0990048	0.324032			29.5333	-0.0676912	0.162496	0.064005	-0.0444282	-0.188702	-0.157551	0.163188			29.5333	0.319486	0.131618	0.204891	0.164349	-0.129413	0.240368	0.363238			29.5333	-0.0886099	0.0990206	0.0395793	-0.195633	-0.0461728	0.179904	-0.218864
29.5667	-0.208166	-0.0222722	0.181156	-0.160681	-0.0233252	-0.473413	-0.0566694			29.5667	-0.22724	0.631493	0.198679	-0.0870485	-0.227335	0.162699	0.470998			29.5667	0.155789	0.307512	0.0857401	-0.0362665	-0.196884	-0.0672955	0.35667			29.5667	-0.278277	0.253198	0.398205	-0.218864	-0.211417	0.0755547	-0.320014
29.6	0.0336682	-0.170265	0.285813	-0.314122	-0.217312	-0.061564	-0.0667765			29.6	-0.194459	0.306702	0.478134	-0.134449	-0.179826	-0.0440298	-0.0531734			29.6	-0.188516	0.186522	0.39402	-0.224968	-0.0984715	0.522047	0.0632656			29.6	-0.241914	0.227599	0.136374	-0.142879	-0.0261789	0.194362	-0.125456
29.6333	0.0493749	-0.126156	0.116037	-0.272293	-0.185277	-0.225821	0.0780922			29.6333	0.0158922	0.448821	0.253726	-0.162331	-0.25396	-0.102583	0.594328			29.6333	-0.37487	0.322763	0.440007	0.0474733	-0.266702	0.0951046	0.177052			29.6333	-0.115955	0.365485	0.233653	-0.227575	-0.272574	0.323856	0.0115087
29.6667	0.412214	-0.115095	0.103634	-0.449219	-0.434794	-0.346597	0.00397332			29.6667	-0.295501	0.239686	0.417418	-0.165119	-0.0968171	-0.131262	0.169316			29.6667	0.0778305	0.254642	0.127407	0.0870522	-0.165791	-0.0232402	0.281485			29.6667	-0.224751	0.167091	0.0700697	-0.17095	-0.153199	0.198134	-0.29388
29.7	0.035143	0.0930986	0.532435	-0.274334	-0.471636	-0.268092	-0.292502			29.7	-0.329965	0.508993	0.140084	-0.13883	-0.089508	-0.0440298	0.165422			29.7	-0.025072	-0.0341084	0.225163	0.202729	-0.32779	-0.303406	0.257859			29.7	-0.165989	0.152546	0.11266	-0.191761	-0.163196	-0.00930781	-0.214024
29.7333	-0.762377	-0.417502	-0.0898928	-0.522294	-0.289303	-0.00479891	-0.029717			29.7333	-0.378096	0.644296	0.133001	-0.182247	-0.264402	0.0324478	0.114679			29.7333	-0.219016	0.0716313	-0.0315616	0.0431929	-0.154662	-0.26562	0.175278			29.7333	-0.328021	0.104257	0.125243	-0.133684	-0.127325	0.176761	-0.10029
29.7667	0.768096	0.246173	0.0608486	-0.230019	-0.0837033	-0.336935	-0.0398242			29.7667	-0.081868	0.367049	0.18567	-0.318871	-0.261269	-0.00937593	0.14152			29.7667	-0.267339	0.104167	0.134619	-0.213782	-0.0835845	-0.0941042	0.0862771			29.7667	-0.315803	0.0996025	0.0226402	-0.239675	-0.196127	0.206935	-0.107065
29.8	-0.847015	-0.556764	-0.351073	-0.407637	-0.404529	0.123225	-0.0970978			29.8	-0.0885715	0.249329	0.173771	-0.117719	-0.0571396	-0.0261054	0.401345			29.8	-0.0383199	0.120434	0.418742	-0.0790843	-0.148986	-0.0451433	0.122366			29.8	-0.285549	-0.0202484	0.396753	-0.28662	-0.202596	-0.0966849	-0.16853
29.8333	0.0697982	-0.0879926	-0.219932	-0.414369	-0.343851	-0.271716	0.0107114			29.8333	-0.0478876	0.696612	0.126537	0.0312528	-0.259181	-0.253148	0.245934			29.8333	-0.0119966	0.32073	0.218016	0.132056	-0.2833	0.188744	0.0828979			29.8333	-0.29544	-0.091228	0.108304	0.0148965	-0.229058	0.0730403	-0.161271
29.8667	-0.586069	-0.0446415	-0.143321	-0.16556	-0.545877	-0.257222	-0.110574			29.8667	-0.150782	0.37081	0.164112	-0.130864	-0.183481	-0.035665	0.0756348			29.8667	0.0109661	-0.0717274	0.160903	-0.0676094	-0.155307	-0.0533536	0.252115			29.8667	-0.292822	0.229344	0.0816851	-0.167562	-0.132617	-0.0137081	-0.0872223
29.9	0.223199	-0.28726	0.111104	-0.124696	0.0482734	0.0447196	-0.450847			29.9	-0.0288588	0.621813	0.380232	0.130833	-0.1177	0.0228881	0.458401			29.9	-0.0833071	0.209906	0.452579	-0.155847	0.0170632	-0.243873	0.0171337			29.9	-0.279731	0.054222	0.119919	-0.315175	-0.181426	0.3314	-0.211604
29.9333	0.000104328	-0.311397	0.211789	-0.210239	-0.518068	0.0410963	-0.198169			29.9333	0.289208	0.694782	0.340433	-0.128076	-0.355242	0.00376873	0.99159			29.9333	-0.0115368	0.16517	0.371362	-0.0709608	-0.36865	-0.0108716	0.320874			29.9333	-0.200025	0.295087	0.292214	-0.0809306	-0.0885129	0.114529	-0.115777
29.9667	-0.203219	-0.102604	0.121488	-0.120924	-0.234731	-0.295871	-0.113943			29.9667	-0.0840858	0.722654	0.364226	-0.0950149	-0.200709	-0.0822686	0.668108			29.9667	0.0776084	0.321746	0.519923	-0.22698	-0.271134	-0.228348	0.0632962			29.9667	-0.290495	0.178727	0.0163484	-0.108033	-0.240819	0.175504	0.0144125
30	0.0486746	0.106963	-0.0954458	-0.267287	-0.511418	0.201729	-0.0667765			30	0.0400877	0.558877	0.472278	0.0499738	-0.129708	0.137604	0.20882			30	-0.18504	0.131618	0.374423	-0.242703	-0.191652	-0.443871	0.221755			30	-0.453981	0.256689	0.0802332	-0.17579	-0.113211	-0.146974	-0.214508
30.0333	0.6543	0.180317	0.133378	-0.368834	-0.197108	-0.00600665	0.067985			30.0333	0.229965	0.445524	0.243562	-0.147992	-0.0926404	-0.0727089	0.589408			30.0333	-0.128053	0.348181	0.312904	0.0484259	-0.140011	0.172456	0.139587			30.0333	-0.212533	-0.0615561	0.06523	-0.160787	-0.269634	-0.0451387	-0.0572159
30.0667	-0.17007	0.159655	-0.0502897	-0.186516	-0.375912	-0.113498	-0.191431			30.0667	0.0333861	0.380605	0.448956	-0.0790821	-0.109347	0.27622	0.408337			30.0667	-0.291806	0.0329957	0.0826517	-0.0993441	-0.0895396	0.00365592	-0.0530111			30.0667	-0.264605	0.34105	0.187192	-0.199505	-0.112623	0.146588	-0.107065
30.1	-0.563354	-0.390825	-0.52173	-0.302853	-0.193602	0.15825	0.128628			30.1	0.0742065	0.697059	0.23448	-0.140424	0.0149062	-0.156356	0.755106			30.1	-0.275895	0.0675644	0.179733	-0.0609975	-0.158067	0.0142435	0.458962			30.1	-0.344311	0.0740033	0.209455	-0.105129	-0.326676	-0.0998279	-0.335986
30.1333	-0.382321	0.235316	-0.0595395	-0.198987	-0.321601	-0.077265	-0.16111			30.1333	-0.0580913	0.59629	0.627837	-0.234427	-0.200187	0.0479823	0.388087			30.1333	-0.269807	0.359365	0.203441	-0.157968	-0.00945317	-0.0561216	-0.013167			30.1333	-0.361474	0.0286228	0.251076	-0.113357	-0.440759	0.0868698	0.0139286
30.1667	0.222472	0.223958	-0.249749	-0.0886422	-0.209837	-0.0820961	0.317294			30.1667	0.00901388	0.395033	0.402421	-0.123296	-0.0832432	0.0862211	0.142216			30.1667	-0.179969	0.15907	0.210264	0.112107	-0.139546	-0.125824	0.369102			30.1667	-0.215151	0.146728	0.0115087	-0.148687	-0.179662	-0.00930781	-0.384867
30.2	-0.820605	-0.158751	0.206829	-0.105186	0.035041	-0.233067	-0.262181			30.2	0.00869511	0.455864	0.641919	-0.173086	-0.234122	0.0432024	0.481323			30.2	-0.100865	0.300395	0.402915	-0.0800311	-0.118795	0.42206	0.607489			30.2	-0.257041	0.0524767	0.0492588	-0.00543045	-0.169077	0.181162	-0.13804
30.2333	-0.66118	-0.365579	-0.456323	-0.412024	-0.366096	0.0652517	0.0545089			30.2333	0.211927	0.380256	0.587391	-0.118118	-0.179304	-0.168306	0.505415			30.2333	-0.0445806	0.0858655	0.0933626	-0.0683817	-0.0133163	-0.0433139	0.0304735			30.2333	-0.344311	-0.110427	-0.00591446	-0.121585	-0.0673429	0.152245	-0.0417286
30.2667	0.121828	0.0581542	0.363144	-0.112665	-0.0554044	-0.317611	-0.272288			30.2667	0.153226	0.464564	0.618232	-0.0611577	-0.330705	0.00257375	0.378814			30.2667	-0.0122325	0.127551	0.384798	-0.242797	-0.278986	-0.0402133	0.244485			30.2667	-0.27595	0.0338591	0.158637	-0.221768	-0.14379	0.034695	0.0202202
30.3	-0.505134	-0.583843	-0.129202	-0.231946	-0.306084	0.137718	-0.127419			30.3	-0.171432	0.586298	0.568895	-0.134847	-0.286851	0.0216931	0.213242			30.3	-0.0600478	0.271927	0.396377	0.0770223	-0.110853	0.241278	0.306972			30.3	-0.378346	0.0664399	0.0739416	-0.230479	-0.117916	0.0516675	-0.423585
30.3333	-0.638162	-0.0687316	0.257697	0.0762693	0.0561332	-0.299494	-0.36999			30.3333	0.241764	0.355383	0.509123	-0.111346	-0.317131	-0.0153507	0.258609			30.3333	-0.0938583	0.0543469	0.438994	0.113394	-0.21043	0.298012	0.342015			30.3333	-0.414418	0.0111688	0.0971724	-0.268713	-0.207888	0.0893842	-0.17095
30.3667	-0.415841	0.0660667	0.00407039	-0.0117398	-0.248066	-0.114706	-0.0128719			30.3667	0.147761	0.597384	0.387304	-0.0982015	-0.107258	-0.0500046	0.307473			30.3667	0.0223909	0.396984	0.44171	0.0171123	-0.124438	0.365984	0.744658			30.3667	-0.362929	0.167673	0.0589382	-0.177726	-0.298449	0.137159	-0.106097
30.4	-0.0971077	-0.170018	0.114305	-0.303134	-0.312774	-0.0313698	0.266758			30.4	0.177765	0.542234	0.589317	-0.15078	0.020649	0.0443974	0.601139			30.4	-0.222515	0.349198	0.156102	-0.0788552	-0.113238	0.215528	0.184026			30.4	-0.446999	0.107748	-0.0939979	-0.229027	-0.0838085	0.0196084	-0.107549
30.4333	-0.167292	0.28769	-0.0594998	-0.350663	-0.383752	-0.175094	-0.0937288			30.4333	-0.0651323	0.565775	0.352887	-0.10816	-0.141193	-0.114533	0.181973			30.4333	0.0945501	0.016728	0.35465	-0.0377326	-0.107904	-0.140979	0.331487			30.4333	-0.25355	0.21189	0.0666819	0.00812085	-0.330204	0.1095	-0.25613
30.4667	-0.186158	0.18539	0.573157	-0.287887	-0.357973	-0.257222	-0.16111			30.4667	0.0172024	0.399525	0.246415	-0.0754972	0.0535395	-0.0452248	0.208831			30.4667	-0.352905	-0.00564007	0.290054	-0.164763	-0.201175	0.116829	0.398967			30.4667	-0.190716	0.115311	0.343032	-0.0794787	-0.169077	0.0566964	-0.168046
30.5	-0.776719	-0.63755	-0.18204	-0.0306657	-0.192722	-0.0434475	-0.319454			30.5	-0.120218	0.601513	0.395336	-0.170696	-0.253438	0.183013	0.453196			30.5	0.0525133	0.179404	0.392745	-0.186964	-0.112762	-0.0174277	0.456735			30.5	-0.343729	-0.0772648	0.201711	-0.0436646	-0.260813	-0.0878842	0.0289318
30.5333	-0.134977	-0.241022	-0.0408949	-0.390141	-0.435153	0.0869915	-0.134157			30.5333	0.46657	0.545078	0.413947	0.0511688	0.0775547	0.137604	0.186618			30.5333	0.0154402	0.28006	0.445718	0.0143371	-0.215405	0.0757504	0.381002			30.5333	-0.310567	0.0751669	0.0860409	-0.0586678	0.00792829	0.191219	-0.234351
30.5667	-0.136045	0.20481	0.120585	-0.291449	-0.402222	-0.0676028	-0.319454			30.5667	-0.0197765	0.317432	0.399554	-0.216503	-0.0185063	0.0993657	0.269461			30.5667	-0.187753	0.234308	0.327255	0.0409095	-0.113217	-0.00761813	0.548293			30.5667	-0.148535	0.0670217	0.174124	-0.0383408	-0.160844	0.180533	-0.013658
30.6	-0.687881	0.102834	-0.200945	-0.352738	-0.220129	-0.165432	-0.184693			30.6	-0.0232726	0.708941	0.388613	-0.191807	-0.275887	-0.069124	-0.0320445			30.6	-0.0165591	0.216007	0.491722	-0.218617	-0.197159	0.269081	0.311599			30.6	-0.132245	0.0146596	0.0594223	-0.0862544	0.0808473	0.160417	-0.0915781
30.6333	-0.217209	-0.243039	0.0692759	-0.33633	-0.224959	0.00607106	-0.396942			30.6333	-0.038749	0.477579	0.196414	-0.187824	-0.0498306	0.0420075	0.0362073			30.6333	-0.0528832	0.469172	0.217041	0.0196003	-0.0722532	0.0567416	0.206493			30.6333	-0.179952	0.0856393	0.0991083	-0.149171	-0.0843965	0.149102	-0.130296
30.6667	-0.664909	0.127904	-0.0783581	-0.517441	-0.557608	-0.149731	0.0848302			30.6667	-0.203539	0.279976	0.154863	-0.169899	-0.0858535	-0.194595	-0.000949952			30.6667	-0.0238238	0.248542	0.18632	0.034499	-0.342109	-0.547969	0.031909			30.6667	-0.18228	0.289851	0.172188	0.0865249	0.0332147	0.0592109	-0.243546
30.7	-0.316922	-0.230848	-0.0288315	-0.128222	-0.589364	0.119601	-0.238597			30.7	0.0463988	0.444722	0.438734	-0.146	-0.316087	-0.0261054	0.0777362			30.7	-1.12748e-05	0.182455	0.419091	0.0118743	-0.339866	0.196537	0.363333			30.7	-0.172389	0.288106	0.149442	0.0018292	-0.219061	0.156646	-0.139976
30.7333	-0.878899	0.0859192	-0.160736	-0.668079	-0.461768	0.153419	0.101675			30.7333	-0.203102	0.359377	0.359316	0.00615859	-0.241953	-0.19818	0.177174			30.7333	-0.159827	0.290228	0.336094	0.00945847	0.00124355	-0.170046	0.362783			30.7333	-0.231733	0.35734	0.161541	-0.053828	-0.254933	0.20442	-0.0799626
30.7667	0.153106	0.165359	-0.0299871	-0.389337	-0.525507	-0.356259	-0.164479			30.7667	-0.0122979	0.32078	0.468514	-0.151577	-0.220548	-0.112143	0.131781			30.7667	0.00710657	0.0767149	0.618967	0.108939	-0.096634	0.308256	0.255602			30.7667	-0.303585	0.139165	0.224942	-0.073187	-0.34667	0.0856126	-0.221768
30.8	-0.806738	0.109569	0.0685155	-0.435791	-0.408521	0.113562	-0.417156			30.8	-0.176624	0.19084	0.226112	0.0268713	-0.292594	-0.005791	0.330119			30.8	-0.0509208	0.0462131	0.285625	-0.04199	-0.1134	0.0717464	0.0870108			30.8	-0.248605	-0.0144303	0.0661979	-0.121585	-0.260813	-0.0828554	-0.195149
30.8333	-0.422028	0.00729797	-0.153864	-0.397103	-0.579769	-0.234275	-0.252074			30.8333	-0.160639	0.589844	0.305649	0.011735	-0.10256	0.11012	0.26244			30.8333	-0.00113688	0.460021	0.398561	-0.049053	-0.0613768	-0.323424	0.508852			30.8333	-0.229115	0.100766	0.0933005	0.026028	-0.14673	0.235851	-0.157883
30.8667	-0.376598	0.120518	-0.0946683	-0.34566	-0.490081	-0.527763	-0.201538			30.8667	-0.00812752	0.453157	0.248618	-0.222478	-0.0691472	-0.0810736	0.215424			30.8667	-0.0665352	0.244475	0.359712	0.0413482	-0.204817	-0.0357109	0.279475			30.8667	-0.289622	-0.0889008	0.108304	-0.0838345	-0.184954	0.120815	-0.199505
30.9	-0.743633	-0.287191	-0.0508511	-0.20988	-0.296999	-0.283793	0.0107114			30.9	0.0505434	0.724118	0.224091	-0.0519963	-0.355242	-0.116923	0.0357522			30.9	-0.0591579	0.121451	0.359589	-0.123684	-0.215133	-0.115069	0.205262			30.9	-0.29544	-0.0755194	0.00424902	-0.244998	-0.301389	-0.125601	-0.287588
30.9333	-0.438512	0.211293	-0.302162	-0.440548	-0.410047	-0.408193	-0.356514			30.9333	0.0480946	0.69723	0.259949	-0.072709	-0.299903	0.0527621	0.0907614			30.9333	-0.218618	0.258709	0.334026	-0.0762334	-0.374315	0.163089	0.322454			30.9333	-0.233769	-0.0772648	0.105884	-0.0397927	-0.114975	0.267281	-0.133684
30.9667	-0.0755227	0.0635476	0.326612	-0.300087	-0.150818	0.135302	-0.0431932			30.9667	0.132903	0.568498	0.295935	-0.197782	-0.238298	0.0216931	0.526535			30.9667	-0.0466914	0.187538	0.201822	0.118275	-0.122069	0.0857914	0.0907564			30.9667	-0.28584	0.219453	0.114596	-0.0475363	-0.222002	0.105099	-0.187405
31	-0.73289	-0.118283	-0.203693	-0.330019	-0.366659	-0.241522	-0.0364552			31	0.0664263	0.272202	0.4287	-0.0643442	-0.232555	-0.0500046	0.171951			31	0.0399129	0.297345	0.371012	-0.221356	-0.268442	-0.370407	0.0335464			31	-0.348384	0.0356044	-0.0359209	-0.21838	-0.199067	0.0240086	-0.212088
31.0333	-0.337291	0.0820922	0.46201	-0.649819	-0.248016	-0.102628	-0.204907			31.0333	0.0254261	0.442042	0.227951	-0.0950149	-0.370904	-0.0882434	0.158336			31.0333	-0.195992	0.226174	0.408542	0.177086	0.126584	-0.0678748	0.0374105			31.0333	-0.3958	-0.0202484	0.0328036	-0.12836	-0.0244148	0.0730403	-0.177242
31.0667	-0.59592	-0.00851584	-0.177223	-0.218468	-0.385763	-0.0784727	0.0848302			31.0667	0.165063	0.527507	0.407415	-0.166314	0.0618926	0.00257375	0.318136			31.0667	-0.456682	0.0980662	0.356409	0.127105	-0.171778	0.092115	0.111849			31.0667	-0.263441	0.0885483	0.118951	-0.305011	-0.192599	-0.0489104	-0.324854
31.1	0.0168899	0.104716	-0.354131	-0.280826	-0.422393	-0.0277465	-0.376728			31.1	-0.0765431	0.311032	0.337253	-0.0743022	-0.106736	-0.125287	0.170909			31.1	-0.154615	0.304462	0.325707	0.0232575	-0.195993	0.0323331	0.428628			31.1	-0.358274	0.368976	0.18574	-0.224671	-0.181426	0.237737	-0.0693152
31.1333	-0.717484	0.103497	0.227831	-0.293079	-0.47087	-0.227028	-0.245336			31.1333	-0.164273	0.297275	0.412264	-0.0946166	-0.142237	-0.0822686	0.457142			31.1333	-0.221794	0.149919	0.210403	0.150689	-0.0568534	-0.223318	0.161348			31.1333	-0.307949	0.0152415	-0.0969018	-0.131264	-0.149083	-0.0243945	0.00376512
31.1667	-0.30116	0.392127	0.357832	-0.341033	-0.231353	-0.0905505	-0.167848			31.1667	0.168878	0.39039	0.427717	-0.0647426	-0.0247713	-0.0989981	0.0540668			31.1667	0.218486	0.522042	0.591752	0.0296131	-0.129634	0.180423	0.220082			31.1667	-0.302131	0.133929	0.176544	-0.0412446	-0.156139	0.153503	-0.226607
31.2	-0.508274	-0.299163	-0.123092	-0.326808	-0.432697	-0.106251	-0.0869907			31.2	0.0901766	0.407579	0.255723	-0.0707174	-0.244041	0.0121335	0.175597			31.2	-0.0922621	0.231258	0.326906	0.0445687	-0.244388	0.0705014	0.0176558			31.2	-0.175589	0.163019	0.10298	-0.181597	-0.0473489	0.0497817	-0.247418
31.2333	-0.108276	0.318909	0.396353	-0.477749	-0.335631	0.0676672	-0.231859			31.2333	-0.057393	0.361778	0.421988	-0.257132	-0.0900301	0.157919	0.41122			31.2333	0.161571	0.138735	0.279445	-0.0175179	0.0162055	-0.000718383	0.126907			31.2333	-0.335002	0.0361863	0.0603902	-0.0335011	-0.376661	0.0843553	-0.169014
31.2667	-0.516379	0.331845	0.0182181	-0.244273	-0.522293	0.0362652	0.630614			31.2667	-0.0705069	0.404733	0.589396	-0.219689	-0.0341685	-0.0810736	0.0803524			31.2667	-0.0402614	0.137719	0.239656	-0.164954	-0.175264	0.265296	0.181624			31.2667	-0.305331	-0.112755	0.196871	-0.176758	-0.0544056	0.294312	-0.270649
31.3	-0.170854	0.116135	0.433215	-0.36527	-0.225519	-0.23669	-0.407049			31.3	0.075242	0.476375	0.382919	-0.165916	-0.153723	-0.00937593	0.21835			31.3	-0.0688191	0.352248	0.523148	-0.251719	-0.123698	-0.305317	0.505698			31.3	-0.244242	-0.0115214	-0.126908	-0.0252734	0.00498807	0.257852	-0.110937
31.3333	-0.356218	0.296787	-0.415301	-0.47725	-0.465616	0.167912	0.324032			31.3333	0.185759	0.368798	0.423248	-0.128474	-0.0639266	-0.100193	0.326303			31.3333	-0.038374	-0.113413	0.31134	-0.00688803	-0.273846	0.000223175	0.293052			31.3333	-0.323075	-0.131372	0.198807	0.122339	-0.400183	0.180533	-0.214508
31.3667	0.0778667	0.246817	0.574089	-0.546734	-0.170025	-0.264469	0.067985			31.3667	0.142107	0.475627	0.294823	-0.306125	-0.135972	0.0802463	0.169108			31.3667	-0.0967182	0.269893	0.307147	-0.133652	0.173555	0.0188928	0.0896279			31.3667	-0.142135	0.150801	0.0216722	-0.115293	-0.212005	0.139673	-0.155947
31.4	-0.648737	-0.322953	0.0819972	-0.092983	-0.392541	-0.0905505	-0.29924			31.4	-0.0105104	0.326909	0.13809	-0.253148	-0.282674	-0.109753	0.244986			31.4	0.0775656	0.083832	0.373983	-0.160553	-0.24277	0.232995	0.390829			31.4	-0.380674	-0.1273	-0.00639836	-0.283232	-0.340789	0.110757	-0.18063
31.4333	-0.155679	0.503818	0.312708	-0.410146	0.0653254	-0.0434475	-0.0970979			31.4333	0.0560311	0.505496	0.26032	-0.181849	-0.139105	-0.0165457	0.599094			31.4333	0.0512103	0.182455	0.308337	0.0186071	-0.192124	0.365382	0.501992			31.4333	-0.227078	0.0705124	0.299474	-0.104645	-0.198479	0.267281	-0.0939979
31.4667	1.23213	0.515626	-0.342348	-0.0642712	-0.465261	-0.216158	0.29371			31.4667	-0.175177	0.519669	0.375496	-0.258327	-0.0832432	0.163894	0.180921			31.4667	-0.023758	0.212956	0.233685	-0.0103357	-0.0253629	0.170351	0.567993			31.4667	-0.282349	0.265997	0.138794	-0.199505	-0.18025	0.0818409	-0.216928
31.5	0.0547274	0.106618	0.0307641	-0.313745	-0.220397	-0.118329	0.118521			31.5	0.115518	0.41926	0.300791	-0.250758	-0.133362	-0.0476147	0.11695			31.5	-0.131599	0.681668	0.407239	0.169834	-0.142613	0.246257	0.368196			31.5	-0.225624	0.21189	0.250592	-0.124488	-0.0444087	0.275453	-0.100774
31.5333	-0.324153	-0.208712	-0.25942	0.00067444	-0.0998466	-0.0192921	-0.184693			31.5333	-0.0165699	0.305622	0.442133	-0.10816	-0.152157	0.089806	0.294931			31.5333	-0.141579	0.254642	0.474473	0.0994578	-0.088817	0.263817	-0.0027169			31.5333	-0.1177	0.150801	0.0308677	-0.166594	-0.156727	0.3314	-0.301623
31.5667	-0.193642	0.569807	0.126238	-0.0876624	-0.354804	-0.43718	-0.0970978			31.5667	-0.244203	0.52262	0.546182	0.213285	-0.27902	0.28578	0.368815			31.5667	-0.202055	0.404101	0.406247	-0.242021	0.00559254	0.368069	0.503089			31.5667	-0.149408	0.148474	0.342064	-0.053344	-0.171429	0.0478958	-0.0460844
31.6	0.00841347	-0.187426	0.294214	-0.189042	-0.322509	-0.156978	0.522805			31.6	0.140217	0.67389	0.530264	-0.0161474	-0.125531	0.185403	0.300707			31.6	0.00898703	0.213973	0.512929	0.0692897	-0.236006	-0.0575137	0.337784			31.6	-0.265768	0.221199	0.128147	-0.136104	-0.175545	0.416891	-0.100774
31.6333	0.267727	0.203423	0.267717	-0.407705	-0.294277	-0.346597	-0.420525			31.6333	0.0236302	0.45499	0.466431	-0.0950149	-0.143803	-0.0476147	0.193117			31.6333	-0.0359668	0.178388	0.315945	-0.039637	-0.317581	0.150995	0.168808			31.6333	-0.229987	0.0425861	0.149926	-0.00446255	-0.157315	0.26791	-0.138524
31.6667	-0.298754	-0.00461858	-0.0372905	-0.0323231	-0.539086	-0.311572	0.175794			31.6667	-0.267563	0.391659	0.366436	-0.0906335	-0.226813	-0.220884	0.477774			31.6667	0.0885397	0.399018	0.466959	-0.154433	0.0137954	0.412146	0.10945			31.6667	-0.376892	-0.0662106	0.199775	-0.114325	-0.194363	0.0629825	-0.238223
31.7	-0.450804	-0.258686	0.14462	-0.591274	-0.382382	-0.224613	-0.241967			31.7	0.171806	0.540575	0.377011	-0.225664	-0.326528	-0.0523945	0.203745			31.7	-0.0824672	0.138735	0.488567	-0.0262297	-0.297629	-0.073117	0.101526			31.7	-0.391146	0.103093	0.13347	-0.150623	-0.0014806	0.445807	-0.00591446
31.7333	-0.654175	-0.0131636	-0.0348251	-0.506336	-0.644166	-0.061564	-0.363252			31.7333	0.0652947	0.471785	0.431463	-0.136839	-0.393353	0.0360326	0.329828			31.7333	-0.105186	0.0207949	0.478844	0.0429138	-0.138854	0.127277	0.189059			31.7333	-0.233187	0.225271	0.391913	-0.259034	-0.263754	0.201277	-0.105129
31.7667	-0.560969	0.199779	-0.00337684	-0.0750753	-0.400062	-0.102628	-0.0431932			31.7667	-0.239422	0.624802	0.337019	-0.145602	-0.156333	-0.0416398	0.115736			31.7667	0.0188189	0.462055	0.50342	-0.178885	-0.283533	-0.124156	0.271931			31.7667	-0.220097	0.16651	0.238493	-0.307915	-0.184954	0.183676	-0.176758
31.8	0.175967	-0.470123	0.0786692	-0.265232	-0.329571	-0.240314	-0.191431			31.8	0.0220011	0.103979	0.238096	-0.038055	-0.126053	0.174648	0.428911			31.8	0.209422	0.398001	0.574433	0.0640717	-0.112414	0.193022	0.568047			31.8	-0.212824	0.294506	-0.00155862	-0.115293	-0.242584	0.193734	-0.201925
31.8333	0.620798	0.155826	0.299157	-0.18926	-0.0327007	-0.285001	-0.167848			31.8333	-0.119986	0.527188	0.536035	0.0531604	-0.264402	-0.0105709	0.0276116			31.8333	-0.0956304	0.124501	0.473715	-0.175827	-0.261376	-0.188324	0.281463			31.8333	-0.170062	0.277633	0.288827	-0.252258	-0.337261	0.0535534	-0.164658
31.8667	-0.534472	-0.0603078	-0.407025	-0.411694	-0.489803	-0.341766	0.071354			31.8667	-0.073463	0.304133	0.583047	-0.0962099	-0.260747	-0.143212	0.168115			31.8667	0.2931	0.186522	0.658982	-0.300165	-0.0331938	-0.0639011	0.0337375			31.8667	-0.242205	-0.0499202	-0.0378568	-0.226123	-0.362547	0.159789	-0.109485
31.9	-0.594027	0.219582	-0.115434	-0.178646	-0.631926	0.13651	-0.44074			31.9	0.378387	0.359465	0.365147	-0.104973	-0.27902	-0.131262	0.294486			31.9	0.0285594	0.443754	0.122175	0.289976	-0.17718	0.153201	0.388658			31.9	-0.396673	0.139747	0.200259	-0.0286612	-0.0661668	0.0837267	-0.275489
31.9333	-0.249545	0.307632	-0.226329	-0.584386	-0.531319	-0.141277	-0.204907			31.9333	-0.253033	0.378358	0.21505	-0.140822	-0.312955	-0.253148	0.298375			31.9333	0.0869627	0.191605	0.589229	-0.0294838	-0.112619	0.0570711	0.487189			31.9333	-0.227369	-0.0580654	0.0192523	-0.165626	-0.269046	0.332657	-0.0243055
31.9667	-0.0748046	0.39352	0.0701997	-0.260917	0.026019	-0.365922	0.286973			31.9667	-0.329465	0.569573	0.110508	-0.132855	-0.110913	0.153139	0.0980638			31.9667	-0.0645391	0.283111	0.291281	-0.18727	-0.1853	-0.17976	0.246365			31.9667	-0.316676	0.0897119	0.359003	-0.0799626	-0.159668	0.000121314	-0.00204263
32	-0.332002	-0.095177	-0.369475	-0.468928	-0.315891	-0.149731	-0.282395			32	-0.260546	0.676192	0.202515	-0.215706	-0.345845	0.0145233	0.0631113			32	-0.0658311	0.512891	0.389839	-0.184056	-0.147695	0.0713573	0.409424			32	-0.161626	0.156037	0.224942	-0.0426965	0.0191014	0.432606	-0.0799626
32.0333	-0.384953	-0.0895831	0.322017	-0.194943	-0.39586	-0.248768	0.145473			32.0333	0.141791	0.583451	0.277838	-0.0822687	-0.222636	-0.0631493	0.48937			32.0333	1.12598	0.310562	0.255727	0.224606	-0.314525	0.348682	0.278119			32.0333	-0.147081	0.116475	0.275759	-0.158367	-0.234939	-0.108	-0.175306
32.0667	-0.486692	0.242494	-0.234747	-0.0921546	-0.457988	-0.398531	0.408258			32.0667	-0.271517	0.303548	0.27299	-0.0328768	-0.284241	0.205717	0.190908			32.0667	1.58565	0.410202	0.422483	0.447626	-0.0522833	0.127444	0.510712			32.0667	-0.290785	0.215963	0.0715217	-0.1332	-0.132029	0.122701	-0.162722
32.1	-0.761324	-0.0369846	-0.209892	-0.304653	-0.470183	-0.24756	-0.188062			32.1	-0.0094226	0.915717	0.315741	-0.0834636	-0.126575	-0.0750988	0.326743			32.1	0.731333	0.361399	0.502401	0.159488	-0.339786	0.416741	0.33606			32.1	-0.300676	0.0763305	0.0705537	-0.0247895	-0.204948	0.0535534	-0.120133
32.1333	-0.258592	0.329282	0.157833	-0.577183	-0.412034	0.190859	0.408258			32.1333	-0.00823644	0.464818	0.339075	-0.0308852	-0.242997	-0.0177407	0.19097			32.1333	1.67391	0.3797	0.498362	0.523484	-0.155403	0.0429066	-0.0360435			32.1333	-0.255296	0.114729	0.359487	-0.0407606	-0.18613	-0.0206228	-0.167078
32.1667	-0.625724	-0.0712176	-0.113716	-0.189744	-0.878917	-0.239106	-0.177955			32.1667	0.277893	0.392664	0.286363	-0.0336736	-0.4252	-0.0679291	-0.0764923			32.1667	1.05876	0.642016	0.509849	0.686902	-0.170497	0.137552	0.206572			32.1667	-0.300385	0.0565493	0.0942685	-0.154979	-0.0620504	0.159789	-0.170466
32.2	-0.518151	0.0288295	-0.18283	-0.333611	0.081161	0.173951	-0.00613381			32.2	0.218041	0.408869	0.235403	0.0392192	-0.178782	-0.0488097	0.200719			32.2	1.07614	0.0756982	0.512989	0.263248	-0.12589	0.377702	0.312876			32.2	-0.29864	0.0146596	0.083137	-0.173854	-0.047937	0.145331	-0.155463
32.2333	-0.521543	-0.24356	0.229884	-0.47013	-0.376423	-0.0663951	-0.0330861			32.2333	0.203739	0.381672	0.4387	-0.211723	-0.305123	-0.130067	0.285969			32.2333	0.556157	0.419352	0.429645	0.688046	0.032034	0.188003	0.103736			32.2333	-0.283804	0.0920391	0.0991083	-0.0199497	-0.197891	0.262881	-0.102709
32.2667	-0.117586	0.157531	0.0235474	0.00629363	-0.0731536	-0.409401	0.0107114			32.2667	0.197429	0.41343	0.311136	0.0941875	0.0107296	0.141189	0.249946			32.2667	0.865072	0.467139	0.183692	0.748818	-0.377447	0.120044	0.532486			32.2667	-0.320166	0.0373498	0.0908807	-0.0122061	-0.16202	0.156646	-0.0673793
32.3	-0.738525	0.271754	-0.361805	-0.259227	-0.0201858	0.237962	0.0545089			32.3	0.172034	0.705605	0.374769	-0.0141558	-0.161554	0.00496361	0.321468			32.3	0.765673	0.27091	0.127809	0.550502	-0.0721528	0.0958435	0.309808			32.3	-0.254132	0.136838	0.0148965	-0.120133	-0.237879	-0.0130795	0.00279711
32.3333	-0.298034	0.0781746	-0.00946169	-0.316416	0.303118	-0.202873	-0.218383			32.3333	-0.217233	0.611918	0.352149	0.056347	0.0070751	-0.171891	0.123533			32.3333	0.40271	0.178388	0.241173	0.36577	0.0477145	-0.0331611	0.522475			32.3333	-0.400746	0.304396	0.160089	-0.278877	-0.240231	0.135273	-0.0470524
32.3667	0.43384	-0.0156847	-0.0931427	-0.324	0.379767	-0.150939	0.29708			32.3667	-0.162701	0.516917	0.253084	0.0511688	-0.130752	0.0754664	0.348141			32.3667	0.310243	0.252609	0.724401	0.45329	-0.239137	-0.0337415	0.233691			32.3667	-0.213988	0.0745851	0.0139286	-0.053344	-0.317267	0.0755547	-0.107065
32.4	-0.719229	-0.11615	0.436123	-0.396435	-0.113516	0.0193565	-0.130788			32.4	0.200863	0.563463	0.232752	0.011735	-0.0790666	-0.131262	0.447189			32.4	0.0973413	0.231258	0.319909	0.236562	-0.0962499	0.134372	0.187645			32.4	-0.248023	0.0571311	0.344968	-0.204344	-0.295509	0.0755547	-0.223703
32.4333	-0.467034	-0.0940832	-0.097195	-0.579012	-0.275434	-0.0591485	0.0376636			32.4333	-0.364211	0.882644	0.380501	-0.0830653	-0.030514	0.297729	0.655439			32.4333	0.313552	0.1123	0.246589	0.118396	-0.206145	-0.171408	0.191854			32.4333	-0.286713	-0.0202484	0.145086	-0.13804	-0.117916	0.0780692	-0.280813
32.4667	-0.190116	0.394	0.11488	-0.337325	0.052536	-0.142484	-0.255443			32.4667	0.223554	0.337765	0.244579	-0.107761	-0.241953	0.125655	-0.00910619			32.4667	0.444493	0.352248	0.407152	0.0708248	0.0196713	0.0830196	0.226759			32.4667	-0.291367	0.126365	0.0681338	-0.174822	-0.0661667	0.157903	-0.180146
32.5	-0.705886	-0.0958129	0.0106376	-0.40578	0.372603	-0.17751	0.388044			32.5	0.0559443	0.488607	0.347406	-0.0818703	-0.335926	0.125655	0.00344217			32.5	-0.130662	0.16212	0.24746	0.154608	-0.149113	-0.0526864	0.481972			32.5	-0.165117	0.299742	0.186708	-0.157883	-0.130265	0.232079	-0.280328
32.5333	-0.441304	0.0355821	-0.0648945	-0.163619	-0.429355	-0.287417	0.270127			32.5333	-0.125315	0.569996	0.202275	-0.112143	-0.286851	-0.249563	0.00657007			32.5333	0.0571517	0.486456	0.418139	0.163492	-0.0621486	-0.228849	0.160633			32.5333	-0.241042	0.17	0.00812085	-0.245482	-0.263166	0.341458	-0.243546
32.5667	-0.438181	0.332014	-0.351703	-0.149377	-0.428714	-0.0156688	0.0814612			32.5667	-0.150698	0.254027	0.348556	-0.0551829	-0.192878	-0.0858535	0.438294			32.5667	0.372576	0.202789	0.433663	0.115069	-0.13651	0.290509	0.501791			32.5667	-0.178789	0.309632	0.0860409	-0.249838	-0.0891009	0.294312	-0.203376
32.6	-0.691201	0.224603	-0.0693453	-0.374883	-0.0278193	0.0749139	-0.0768836			32.6	-0.0538061	0.400697	0.16362	-0.179857	-0.263358	-0.245978	0.511515			32.6	0.129475	0.371566	0.579363	0.30372	-0.135617	0.327695	0.696856			32.6	-0.162208	0.0524767	0.268016	-0.141911	-0.202596	0.105728	-0.146267
32.6333	-0.690608	0.170542	-0.098028	-0.594829	-0.268192	-0.332104	0.064616			32.6333	0.0845681	0.481893	0.506863	0.0336427	-0.0868977	0.0193033	0.237893			32.6333	0.393049	0.0187614	0.716973	-0.0471326	-0.117438	0.274155	0.287114			32.6333	-0.223297	0.197927	0.353195	-0.0959339	0.00145973	0.316313	-0.131748
32.6667	-0.566775	-0.158274	0.120106	-0.260696	-0.00159862	-0.170263	0.286973			32.6667	0.238175	0.416263	0.440929	0.0280663	0.0326566	-0.038055	0.156302			32.6667	0.0780743	0.561694	0.287147	0.132608	-0.0870999	0.0992683	0.0778435			32.6667	-0.22446	0.15371	0.406433	-0.165626	-0.177897	0.253452	0.0289318
32.7	-0.191703	-0.0622693	0.270297	-0.525429	-0.0862104	-0.0700184	0.0612469			32.7	-0.00878536	0.485449	0.264463	-0.241597	-0.299381	0.0659067	0.0415244			32.7	0.0840684	0.258709	0.328298	0.121125	-0.225099	0.233358	0.375918			32.7	-0.257041	0.178146	0.202195	-0.106097	-0.233175	-0.018737	-0.0814147
32.7333	-0.345425	0.0944997	-0.167368	-0.24247	-0.433702	-0.0398242	0.067985			32.7333	0.0513267	0.400788	0.200654	-0.161136	-0.224724	0.0503723	0.407272			32.7333	0.0250737	0.242442	0.230983	-0.0982212	-0.0452431	-0.0683161	0.327479			32.7333	-0.0630107	0.0193141	0.236073	-0.121585	-0.281983	0.0837267	-0.188857
32.7667	-0.233772	0.0174337	0.0560824	-0.39978	0.181002	-0.0784727	-0.0431932			32.7667	0.213662	0.940129	0.0603203	-0.158348	-0.227335	0.113705	0.424315			32.7667	0.0733198	0.171271	0.214033	-0.0539843	-0.322128	0.377095	0.116236			32.7667	-0.157844	0.0588765	0.237041	-0.263389	-0.106743	0.18179	-0.0910941
32.8	-0.335236	0.0408119	-0.302523	-0.293706	0.0374548	0.184821	0.162318			32.8	0.144394	0.759819	0.354929	-0.200172	-0.313999	-0.116923	0.364264			32.8	0.0145849	0.27396	0.2904	-0.347475	-0.199058	-0.182761	0.385195			32.8	-0.138354	0.15371	0.299958	-0.159335	-0.229646	0.0962989	-0.245966
32.8333	-0.133519	0.0712141	0.22162	-0.394299	0.300997	-0.328481	0.162318			32.8333	0.203521	0.715193	0.285573	-0.171493	-0.0947288	0.0706866	0.242318			32.8333	-0.082075	0.3797	0.346932	-0.179455	-0.100056	0.307416	0.277331			32.8333	-0.256168	0.0786577	0.0628101	-0.190793	-0.110271	0.0478958	-0.270649
32.8667	-0.743176	0.161237	-0.0693104	-0.312428	-0.471456	-0.0374086	0.209485			32.8667	0.137308	0.416808	0.305211	-0.294175	-0.210106	0.130435	0.0542132			32.8667	0.265986	0.146869	0.221414	-0.0468313	0.020297	0.0181985	0.0942038			32.8667	-0.366129	0.0466587	-0.053344	-0.234351	-0.234351	0.330771	-0.207248
32.9	0.0936318	0.11145	-0.167236	-0.446876	0.119022	-0.187172	-0.164479			32.9	-0.0122725	0.38747	0.316561	-0.187425	-0.265446	0.11729	0.306139			32.9	0.155649	0.186522	0.315415	-0.182047	0.043762	0.183947	0.322179			32.9	-0.440599	0.366067	0.262208	-0.0751229	-0.11674	0.196877	-0.101258
32.9333	-0.26673	-0.131136	-0.0816957	-0.442372	-0.576179	-0.217366	0.0747232			32.9333	-0.0406378	0.568223	0.182672	-0.105371	-0.100994	0.265466	0.536007			32.9333	-0.176147	0.186522	-0.0145503	-0.154585	-0.127075	0.407188	0.147905			32.9333	-0.361474	0.113566	0.143634	-0.0368889	-0.378425	0.125215	-0.216444
32.9667	-0.188833	0.0483557	-0.177697	-0.181108	-0.0585257	-0.289832	0.0208185			32.9667	0.262221	0.385954	0.155597	-0.176671	-0.00963111	-0.0667341	0.194637			32.9667	0.0685667	0.314629	0.576007	-0.104241	-0.14048	0.604545	0.411158			32.9667	-0.326566	0.181636	0.184288	-0.141911	-0.234939	-0.0784551	-0.195633
33	-0.526545	-0.181588	-0.552689	-0.132791	-0.26013	0.357532	-0.00276479			33	-0.187058	0.32972	0.538181	-0.0894385	-0.303035	-0.136042	0.223875			33	0.186719	0.274977	0.281824	0.222176	-0.0563318	0.0970806	0.196023			33	-0.455144	0.080403	0.130083	-0.0591518	-0.335496	-0.0891415	-0.21112
33.0333	0.270908	-0.388775	0.0116672	-0.354543	-0.267813	-0.0845116	0.0747232			33.0333	0.0877753	0.589441	0.237134	-0.138432	-0.228901	0.0240831	0.214425			33.0333	-0.200771	0.261759	0.490893	0.0174249	-0.287273	-0.237357	0.126292			33.0333	-0.222715	0.237489	0.307702	-0.154011	-0.195539	0.0252658	-0.169982
33.0667	-0.453213	0.121058	-0.0209634	-0.424	0.149332	-0.200457	-0.275657			33.0667	-0.0819992	0.729672	0.277982	-0.243987	-0.20593	0.0121335	0.390666			33.0667	-0.207504	0.129585	0.635135	0.0771215	-0.226551	-0.0288037	0.487527			33.0667	-0.388237	-0.0161758	0.33674	-0.0407606	-0.153199	-0.0847412	-0.114325
33.1	-0.0327498	-0.179109	0.341674	-0.147272	-0.26125	0.0145254	0.0545089			33.1	-0.0262097	0.300007	0.351516	-0.252352	-0.159988	-0.0284953	0.28975			33.1	-0.105293	0.0248618	0.0848055	-0.118621	-0.0365773	0.0896875	0.360357			33.1	-0.22446	0.00767805	0.043451	-0.0785107	-0.142026	0.108243	-0.248386
33.1333	-0.494011	0.413891	-0.097767	-0.400521	-0.236428	-0.195626	0.249913			33.1333	-0.304736	0.196864	0.292203	-0.0205289	-0.119788	-0.005791	0.0125873			33.1333	-0.142003	0.0970495	0.356328	0.0963881	-0.354289	-0.000105895	0.358615			33.1333	-0.161917	-0.0254845	0.0332875	-0.235319	-0.110859	-0.0199942	-0.298236
33.1667	0.0564323	0.0154626	-0.344339	-0.555458	-0.29448	-0.23669	0.067985			33.1667	0.0838917	0.535395	0.149965	-0.212121	0.0561498	0.284585	0.22942			33.1667	-0.192193	0.510858	0.516707	-0.0367449	-0.188906	-0.0676881	-0.0854967			33.1667	-0.235805	0.0181505	0.0328036	-0.204344	-0.214357	-0.156403	-0.363088
33.2	-0.577004	-0.120224	-0.0141674	-0.297455	-0.365115	-0.0965893	-0.188062			33.2	0.196802	0.322173	0.425085	-0.173882	-0.158943	0.178233	0.253841			33.2	0.156157	-0.0778277	0.393985	0.0515085	-0.231952	-0.16383	0.303412			33.2	-0.197697	0.25727	0.124759	-0.207248	-0.102626	-0.0916559	-0.159335
33.2333	-0.0551719	0.375162	-0.0797277	-0.413488	-0.438889	0.148588	-0.0465622			33.2333	0.0439752	0.291113	0.391758	-0.18623	-0.243519	0.265466	0.313548			33.2333	-0.253805	0.142802	0.0384088	0.0711767	-0.0867165	-0.00031249	0.173737			33.2333	-0.302422	-0.0260664	0.119919	-0.0833505	-0.317267	0.076812	-0.269681
33.2667	0.21374	-0.0360515	0.276927	-0.245959	-0.186623	-0.427518	-0.471061			33.2667	0.0241392	0.644793	0.232223	-0.113736	-0.123443	0.445905	0.453917			33.2667	-0.0328404	0.440704	0.0913407	-0.119485	-0.104063	0.054247	0.118285			33.2667	-0.4054	-0.0493384	0.0782973	-0.150139	-0.45252	-0.1036	-0.161271
33.3	-0.919987	-0.142858	-0.342483	-0.590801	-0.0911355	-0.0917582	-0.231859			33.3	-0.0140334	0.715678	0.187693	-0.196188	-0.0926404	0.128045	0.154761			33.3	-0.0817256	0.0767149	0.674681	-0.102894	-0.0939474	-0.116475	0.142166			33.3	-0.221842	0.174655	0.160089	-0.167078	-0.333144	0.134016	-0.191277
33.3333	-0.489835	-0.0137942	0.182503	-0.536232	-0.104365	-0.0410319	0.0477708			33.3333	-0.0990519	0.435082	0.32605	-0.236817	-0.22368	-0.0344701	0.239383			33.3333	-0.164154	0.250575	0.349635	0.141797	-0.211954	0.0440702	0.233544			33.3333	-0.278859	-0.00512159	0.159605	-0.0978698	-0.308446	0.189333	-0.123036
33.3667	0.114179	-0.201535	-0.309024	-0.445018	-0.263343	-0.218574	-0.0634074			33.3667	-0.190474	0.273168	0.189179	-0.238809	0.211205	0.0527621	0.175145			33.3667	0.0216176	0.15907	0.370489	0.023493	-0.0119565	-0.0678363	0.574932			33.3667	-0.343147	-0.0313026	0.223974	-0.0688312	-0.205536	-0.00113585	-0.156915
33.4	-0.652262	-0.263249	-0.161288	-0.294926	-0.456885	-0.0603563	-0.147633			33.4	0.136513	0.288012	0.324342	-0.204155	0.0650251	-0.0476147	0.354989			33.4	-0.271887	0.195672	0.232318	0.0100574	-0.00844893	0.065807	0.0510796			33.4	-0.387074	-0.0487566	-0.0765748	-0.0393087	-0.153787	0.124587	-0.255162
33.4333	-0.751453	0.522969	0.160116	-0.233576	0.00347317	-0.152147	0.165687			33.4333	-0.0875265	0.3814	0.238701	-0.161136	-0.203319	-0.21491	0.258573			33.4333	-0.231901	0.0909492	0.58897	-0.225384	-0.172388	-0.143524	0.0951165			33.4333	-0.302712	0.132765	0.134438	-0.0906101	-0.0990979	0.387975	-0.21112
33.4667	-0.686116	-0.0513307	0.0702144	-0.252569	-0.641579	-0.336935	0.067985			33.4667	0.248135	0.545011	0.12962	-0.246775	-0.150068	-0.0786838	-0.0387441			33.4667	0.0574064	0.251592	0.298539	-0.0763687	0.173943	0.0450849	0.285495			33.4667	-0.240751	0.217126	0.0937845	-0.00833427	-0.0579339	-0.233094	-0.142396
33.5	-0.515704	0.000195959	-0.115041	-0.562829	-0.296076	-0.0639795	0.0612469			33.5	-0.184222	0.451277	0.170257	-0.0770905	-0.0879419	0.00376873	0.387577			33.5	-0.15617	0.186522	0.391605	-0.0929364	-0.171568	-0.124413	0.492391			33.5	-0.325984	0.230508	-0.0760909	-0.108517	-0.0926293	0.106985	-0.271617
33.5333	-0.745145	-0.0106689	0.0575657	-0.654335	-0.459419	-0.242729	0.108413			33.5333	-0.0549928	0.482032	0.231101	-0.260318	-0.0487864	-0.185035	0.259552			33.5333	-0.0482641	0.330897	0.585783	-0.0519078	0.0112778	-0.0437704	0.151788			33.5333	-0.345766	0.239816	0.0521626	-0.0228536	-0.260813	0.126472	-0.128844
33.5667	-0.0195979	0.250425	-0.0530608	-0.356398	-0.314403	-0.178718	-0.366621			33.5667	0.0044435	0.563871	0.354465	-0.189417	-0.20854	0.106536	-0.12196			33.5667	-0.0505369	0.178388	0.392988	0.0595879	-0.361486	-0.1123	0.447373			33.5667	-0.199443	0.254943	0.102496	0.0410312	-0.0132417	0.389861	-0.172402
33.6	-0.702801	-0.0209075	-0.425385	-0.259924	-0.0733501	0.177574	0.101675			33.6	0.0655658	0.534827	0.517328	-0.251953	-0.360985	0.184208	0.313145			33.6	-0.0559827	0.398001	0.172883	-0.058485	-0.102345	0.0469968	0.421565			33.6	-0.189552	0.265997	0.188644	0.0347395	-0.206124	-0.0419957	-0.222735
33.6333	-0.117897	0.355274	-0.0172621	-0.302324	-0.280695	-0.1449	-0.181324			33.6333	-0.133222	0.527592	0.254852	-0.273463	-0.221592	-0.100193	0.153279			33.6333	-0.120425	0.244475	0.272108	-0.0549907	0.0546287	-0.0194543	0.282021			33.6333	-0.239878	0.0722579	0.298506	-0.0881903	-0.185542	0.120186	-0.0373728
33.6667	0.293529	-0.0176737	-0.187718	-0.14322	-0.101615	-0.0712261	-0.110574			33.6667	-0.145366	0.546489	0.34317	0.155529	-0.127619	0.0169133	0.296718			33.6667	-0.259604	0.116367	0.548146	-0.00981861	-0.115657	0.0406713	0.197613			33.6667	-0.277695	0.00360542	0.29899	-0.110453	-0.259049	0.220764	-0.108033
33.7	-0.426631	0.134453	0.018049	-0.226268	-0.334351	0.0869915	-0.359883			33.7	0.222991	0.350303	0.277168	-0.149983	-0.0560955	0.396911	0.584066			33.7	-0.000476196	0.161103	0.395694	-0.10821	0.00675605	0.0438297	0.288596			33.7	-0.104609	0.0536403	0.175576	-0.0543119	-0.134969	0.346486	-0.169014
33.7333	-0.642343	0.0757595	-0.133271	-0.404423	-0.453045	-0.315195	-0.285764			33.7333	-0.268232	0.404464	0.248952	-0.110151	-0.0848094	-0.170696	0.485965			33.7333	-0.00797362	0.173304	0.183366	-0.106478	-0.138441	0.0859107	0.552977			33.7333	-0.226496	0.11822	0.200743	-0.131748	-0.224942	0.3358	-0.176274
33.7667	-0.615456	-0.324958	-0.247056	-0.343082	-0.554739	0.198106	-0.0667765			33.7667	-0.0930747	0.554866	0.0500201	-0.0778872	-0.45548	-0.0488097	0.0599821			33.7667	0.200961	0.197706	0.158455	-0.200409	0.156227	0.473031	0.395			33.7667	-0.268968	0.0885483	0.162993	-0.0949659	-0.152023	-0.0595968	-0.102225
33.8	-0.487294	0.36357	0.0251096	-0.375029	-0.096125	0.201729	-0.359883			33.8	-0.135102	0.471025	0.358157	-0.114134	-0.253438	-0.185035	0.257422			33.8	0.0488009	0.313613	0.275115	-0.0595009	-0.183581	0.194404	0.265335			33.8	-0.126427	0.235162	0.210423	-0.00833427	0.0408595	0.160417	-0.2208
33.8333	-0.707912	0.0626422	-0.193207	-0.585937	-0.609366	-0.0277465	0.43521			33.8333	-0.000951286	0.296704	0.281068	-0.232037	-0.111435	0.0969757	0.241504			33.8333	-0.0414281	0.27091	0.203139	-0.122331	-0.310406	0.386887	0.305914			33.8333	-0.112173	0.265416	0.234137	-0.139976	-0.334908	0.219507	-0.158851
33.8667	-0.606501	-0.20882	-0.187567	0.0524825	-0.323667	-0.359883	-0.279026			33.8667	-0.0199139	0.368625	0.360979	-0.153967	-0.112479	0.00974352	0.515036			33.8667	-0.130601	0.175338	0.497663	-0.0469898	-0.0307645	0.598608	0.349428			33.8667	-0.334421	0.133929	0.205583	-0.05286	-0.123208	0.110129	-0.17821
33.9	-1.0274	-0.195176	0.0704359	-0.216849	-0.124382	-0.0796806	0.219592			33.9	0.130091	0.496453	0.281527	-0.000214565	-0.0728018	0.0467873	0.0882447			33.9	-0.268606	0.318696	0.395431	0.187453	-0.146445	-0.0693742	0.375305			33.9	-0.22446	0.0373498	0.0676498	-0.215476	-0.206712	-0.0482818	-0.133684
33.9333	-0.338738	0.241814	0.283545	-0.399421	-0.198597	0.0749139	-0.0802527			33.9333	-0.359374	0.71475	0.193257	-0.273463	-0.193922	-0.131262	-0.00663326			33.9333	-0.0249884	0.298362	0.0803835	0.00498115	-0.196441	0.334622	0.241261			33.9333	-0.182571	0.155455	0.179932	-0.174338	-0.244936	0.158532	-0.166594
33.9667	-0.829445	0.216858	0.000637141	-0.307439	-0.306316	-0.260846	-0.0869907			33.9667	-0.231332	0.390041	0.0632304	-0.0611577	-0.158943	-0.0476147	0.450852			33.9667	0.112942	0.186522	0.216804	0.136698	-0.119312	-0.0770758	0.199064			33.9667	-0.0307208	0.191527	0.269952	-0.197569	-0.359607	0.268539	-0.255646
34	-0.911976	-0.00935865	0.0217537	-0.196151	-0.404427	0.207768	0.135366			34	-0.0257905	0.533998	0.378679	-0.194993	-0.171995	0.00615859	0.177698			34	-0.0793558	0.0146945	0.385887	-0.352156	-0.154722	0.541447	0.117757			34	-0.329475	0.149637	-0.0247895	-0.305011	-0.0973337	0.238994	-0.185469
34.0333	-0.704865	-0.0442584	0.041711	-0.518705	-0.211825	-0.25843	-0.022979			34.0333	-0.205257	0.53107	0.106329	-0.284616	-0.179304	0.0157183	0.0831647			34.0333	-0.134543	0.417319	0.215362	-0.136768	-0.0412744	-0.0612641	0.0872113			34.0333	-0.167735	0.310214	0.044903	-0.0456005	-0.215533	0.284254	-0.228059
34.0667	-0.360071	-0.0968016	0.00210775	-0.377724	-0.19955	0.0580051	0.313925			34.0667	-0.351121	0.359628	0.183571	-0.168704	0.00550894	0.0527621	0.337051			34.0667	-0.0955775	0.251592	0.392423	-0.043047	-0.134554	-0.213952	0.34817			34.0667	-0.309112	0.155455	0.115079	-0.441492	-0.132617	0.122701	-0.0214017
34.1	-0.477542	0.0219582	0.526328	-0.45423	-0.454002	-0.0651873	-0.312716			34.1	0.00600002	0.457395	0.108889	-0.180654	-0.149546	0.142384	0.238321			34.1	-0.065993	0.204823	0.111928	-0.332971	-0.13906	-0.0643566	0.593076			34.1	-0.328603	0.279961	0.112176	-0.17095	-0.15908	0.168589	-0.190793
34.1333	-1.01153	0.210781	0.0958792	-0.171325	-0.534076	-0.0277465	0.0915683			34.1333	-0.347083	0.350799	0.244137	-0.00778269	-0.261792	0.0790514	0.151582			34.1333	-0.158419	0.123484	0.119604	-0.332907	-0.11377	0.168281	0.107581			34.1333	-0.259659	0.0740033	0.273339	-0.00736637	-0.419588	-0.0426243	-0.110937
34.1667	-0.308574	-0.191899	-0.0136439	-0.103629	-0.204653	0.0942381	-0.0735146			34.1667	0.0380032	0.365107	0.326009	-0.292184	-0.276409	0.178233	0.204534			34.1667	-0.202286	-0.087995	0.467679	0.207563	-0.219925	0.0971926	0.429528			34.1667	-0.312021	-0.02723	0.319801	-0.125456	-0.194363	-0.141316	-0.16611
34.2	0.142936	-0.214906	-0.119803	-0.331402	-0.224871	0.281442	-0.450847			34.2	-0.0766032	0.401611	0.207245	-0.119711	-0.161554	-0.00818095	0.262345			34.2	-0.388116	0.193639	0.239009	-0.122958	-0.327632	-0.16205	0.0249917			34.2	-0.394637	-0.0208302	0.179932	-0.213056	-0.33138	0.213849	-0.276941
34.2333	-0.383426	0.300976	-0.154977	-0.300287	-0.420069	0.111147	-0.339669			34.2333	-0.15532	0.575922	0.0317065	-0.133652	-0.212717	0.120875	0.0850127			34.2333	-0.232209	0.572878	0.512701	0.076853	-0.156311	0.159759	0.0788882			34.2333	-0.220678	0.372467	0.207519	-0.109969	-0.116152	0.186819	-0.179178
34.2667	-0.597932	0.358718	0.531257	-0.230732	-0.064185	0.00486326	0.0140804			34.2667	0.234593	0.258773	0.363426	-0.0189357	-0.205408	-0.0643442	0.412425			34.2667	-0.229856	0.0289288	0.153329	-0.133432	-0.203603	0.131727	0.37495			34.2667	-0.46678	-0.0522474	0.0545825	-0.232415	-0.14085	0.101328	-0.295332
34.3	-0.803465	0.00356395	0.150732	-0.285233	-0.210919	0.165496	0.000604298			34.3	0.181721	0.427434	0.339093	0.0248797	-0.17826	-0.072709	0.371304			34.3	-0.377654	0.0268952	0.104139	-0.0234317	-0.122384	-0.250637	-0.017231			34.3	-0.237551	-0.038866	0.0468389	-0.00204263	-0.0144178	-0.00427896	-0.192245
34.3333	-0.230304	0.0693543	0.105645	-0.29568	-0.492387	-0.184756	-0.161109			34.3333	0.0721511	0.649786	0.34846	-0.144805	-0.264402	0.13402	0.245787			34.3333	-0.21366	0.039096	0.468888	-0.17869	-0.338868	-0.0505512	-0.107147			34.3333	-0.406855	0.00476901	0.176544	-0.236287	-0.234351	0.187448	-0.154495
34.3667	-0.553905	0.113719	-0.18247	-0.265983	-0.275714	-0.202873	0.105044			34.3667	0.344417	0.319525	0.309962	-0.163924	-0.182437	-0.0559795	0.440762			34.3667	-0.247479	0.186522	0.359341	-0.183418	-0.0655823	0.345002	0.125083			34.3667	-0.384455	0.20549	0.0192523	-0.0717351	-0.0361759	-0.038224	-0.104161
34.4	-0.893315	-0.217656	0.22465	-0.162811	-0.219428	-0.00479891	-0.0634074			34.4	0.0607277	0.674378	0.0945021	-0.117719	-0.20854	0.00615859	0.0966934			34.4	-0.190372	0.20889	0.182633	-0.303517	-0.106756	-0.00550112	0.296833			34.4	-0.303003	0.343959	0.0521626	-0.0954499	-0.11968	0.146588	-0.160303
34.4333	-0.46061	-0.203145	-0.227667	-0.462626	-0.109254	-0.294663	-0.316085			34.4333	-0.047978	0.701002	0.508438	-0.165119	-0.0921184	0.254711	0.27887			34.4333	-0.22127	0.241425	0.313561	-0.217961	-0.0773886	0.157847	0.268311			34.4333	-0.331512	-0.044684	0.100076	-0.122069	-0.300801	0.16356	-0.0228536
34.4667	-0.756481	0.13017	0.095471	-0.190967	-0.428425	-0.061564	0.0309256			34.4667	0.106173	0.423557	0.152015	-0.21252	-0.224724	0.148359	0.335915			34.4667	-0.320425	0.220074	0.313108	-0.284904	-0.214677	-0.0812232	-0.0621249			34.4667	-0.353911	0.0518948	0.0163484	0.113144	-0.400771	0.176761	-0.188373
34.5	-0.433538	-0.036604	0.229123	-0.165573	0.0184211	-0.235483	-0.147633			34.5	0.056121	0.560408	0.112269	-0.0376568	-0.045132	-0.00698597	0.213134			34.5	-0.238378	0.122468	0.339322	-0.0710579	-0.179592	-0.0586337	0.0853969			34.5	-0.177625	0.0838939	0.161057	-0.136588	-0.203184	0.176133	-0.161754
34.5333	-0.501792	0.078745	-0.384615	-0.33455	-0.42434	-0.351428	0.0174495			34.5333	-0.11442	0.541097	0.157646	-0.0384534	-0.107258	-0.151577	0.427895			34.5333	-0.296959	0.0146945	0.180746	-0.202323	-0.147497	0.206583	0.265743			34.5333	-0.214279	-0.0964642	0.188644	-0.0155939	-0.151435	-0.033195	-0.143847
34.5667	-0.588346	-0.237565	0.0502874	-0.145991	-0.263171	-0.0796806	-0.151002			34.5667	0.449767	0.434617	0.241579	-0.234826	-0.0717576	0.057542	0.296247			34.5667	-0.144777	-0.0951121	0.21589	-0.0495449	-0.240306	-0.0720685	0.133549			34.5667	-0.213115	0.10193	0.0758774	-0.116745	-0.0608743	-0.0306806	0.0236081
34.6	-0.215309	-0.177866	0.0386003	-0.386739	0.245563	0.00486326	-0.366621			34.6	0.365975	0.643204	0.123824	-0.116126	-0.00388832	-0.236419	0.301723			34.6	-0.307732	0.230241	0.116176	-0.128154	-0.112554	0.199723	0.137049			34.6	-0.194498	0.167091	0.138794	-0.283232	0.10731	0.0535534	-0.25855
34.6333	-0.258871	-0.193603	0.166194	-0.170611	-0.383198	0.0447196	0.212854			34.6333	0.248433	0.262605	0.120078	0.00775182	-0.177738	-0.18384	0.292266			34.6333	-0.198935	-0.0442757	0.358303	-0.0131931	-0.250533	-0.191289	0.0971034			34.6333	-0.207297	0.0745851	0.195419	-0.100774	-0.100274	0.239622	-0.124972
34.6667	-0.459129	0.0145327	0.101651	-0.208199	-0.289601	-0.405778	-0.0634075			34.6667	-0.349718	0.563902	0.0696759	-0.0878451	-0.274321	-0.238809	0.184149			34.6667	-0.160258	0.171271	0.408285	-0.194349	-0.0813448	0.00956437	0.173754			34.6667	-0.199443	0.161273	0.188644	-0.113841	-0.247288	0.0830981	-0.0712511
34.7	-0.362519	-0.485059	-0.212184	-0.423	-0.411168	-0.0241232	0.0410328			34.7	0.253416	0.476284	0.259973	0.11012	-0.173039	-0.070319	0.334124			34.7	-0.112532	0.125518	0.134388	0.102014	-0.0258922	-0.124809	0.397146			34.7	-0.152026	0.391666	0.309154	-0.225155	-0.107919	0.156646	-0.122552
34.7333	-0.614571	0.331015	0.162276	-0.278961	-0.501325	-0.278962	-0.272288			34.7333	2.05129e-07	0.227111	0.372261	-0.159543	-0.181393	0.0910009	0.395827			34.7333	-0.104232	0.314629	0.192491	-0.138266	-0.337077	0.0645628	0.183094			34.7333	-0.215151	0.215963	0.22107	-0.163206	-0.347846	0.321971	-0.200473
34.7667	0.364419	-0.219747	-0.0364223	-0.263714	-0.222267	-0.181133	-0.174586			34.7667	0.114076	0.248618	0.4659	0.0487789	-0.0785445	0.0204981	0.310009			34.7667	-0.288756	0.161103	0.222253	-0.119006	-0.18485	0.0229131	0.086493			34.7667	-0.106064	0.300905	0.290762	-0.277909	-0.139086	0.312541	0.0231241
34.8	-0.328967	-0.0838575	-0.0858553	-0.184047	0.0328002	0.0133176	-0.0701455			34.8	0.100195	0.540261	0.151778	0.024083	-0.106736	-0.0225205	-0.0227775			34.8	-0.0580792	0.38275	0.221268	-0.0431372	-0.148342	-0.229034	0.406892			34.8	-0.251223	0.277633	0.146054	-0.0727031	-0.0549937	0.235222	-0.0359209
34.8333	-0.529759	0.368809	0.0541083	-0.508117	-0.317742	-0.376792	-0.292502			34.8333	-0.0614437	0.443386	0.260634	-0.190214	0.10157	0.0730766	0.0142491			34.8333	-0.196834	0.0817985	0.0755033	-0.154697	-0.0427642	-0.042781	0.441881			34.8333	-0.147081	0.142656	-0.00446255	-0.148687	-0.0614623	0.357801	-0.0122061
34.8667	-0.522074	-0.0569806	0.178117	0.0685548	-0.45585	-0.165432	0.246544			34.8667	-0.250683	0.486019	0.243276	-0.3595	-0.155811	0.0360326	0.176366			34.8667	-0.329448	0.135685	0.273437	0.00034543	-0.169625	0.115761	0.113085			34.8667	-0.231442	0.440538	0.345936	-0.0683472	-0.223766	0.509926	-0.0886742
34.9	-0.665196	-0.152683	0.460566	-0.483277	-0.334539	-0.147315	-0.326192			34.9	0.10816	0.463002	0.2769	-0.128474	-0.138583	0.184208	0.340092			34.9	-0.161233	0.197706	0.400535	0.0844968	-0.110159	-0.118977	0.615425			34.9	-0.150281	0.200254	0.0676498	0.0550665	-0.171429	0.102585	-0.257582
34.9333	-0.276669	-0.252232	-0.0712492	-0.39261	-0.430093	-0.292248	-0.127419			34.9333	-0.351114	0.355341	0.152514	-0.234826	-0.0874197	0.0886111	0.472596			34.9333	-0.274101	0.0573972	0.159319	-0.276136	-0.106619	0.332582	0.384833			34.9333	-0.149699	0.0868029	0.259304	-0.152075	-0.069695	0.355287	-0.187405
34.9667	-0.916761	-0.424667	0.141838	-0.408242	-0.514923	-0.189587	0.0747232			34.9667	0.285589	0.471767	0.27993	-0.181451	0.0650251	0.136409	0.289027			34.9667	-0.349683	0.253626	0.285006	0.0491252	-0.150887	-0.157019	0.388111			34.9667	-0.315221	0.42192	0.294634	-0.245482	-0.224942	0.0648684	-0.291944
35	-0.808907	-0.0121938	0.0372886	-0.461468	-0.0403319	-0.152147	-0.100467			35	0.0484227	0.54874	0.343368	-0.215308	-0.0947288	0.0396176	0.334433			35	-0.0441579	0.127551	0.393072	-0.262157	-0.214644	-0.00760509	0.378301			35	-0.290785	0.110657	0.188644	-0.123036	-0.246112	0.189962	-0.0499562
35.0333	-0.125057	0.0176304	0.0241976	-0.496872	-0.53386	-0.246353	0.145473			35.0333	0.15386	0.38061	0.183835	-0.0400466	-0.0712355	-0.142017	0.255063			35.0333	-0.278568	0.0472298	0.3786	-0.0482308	-0.0209877	0.241468	0.224335			35.0333	-0.317548	0.0681853	0.0971724	-0.0378568	-0.0326476	0.213849	-0.111905
35.0667	-0.726722	0.405656	-0.2906	-0.171684	-0.109157	-0.213743	-0.410418			35.0667	0.213286	0.460855	0.0822091	0.11968	-0.171473	0.0647118	0.383483			35.0667	-0.0496953	0.163137	0.19212	-0.167885	-0.0770614	-0.194318	0.315625			35.0667	-0.373401	-0.0190848	0.162993	-0.05286	-0.286688	0.167961	-0.102709
35.1	-0.384771	-0.450708	-0.358778	-0.479312	-0.326398	-0.278962	-0.326192			35.1	0.376776	0.616908	0.353394	-0.149585	-0.153723	0.0276679	0.389614			35.1	-0.220952	0.0523134	0.474214	-0.167649	-0.352636	-0.148737	0.633312			35.1	-0.424309	0.162437	0.165897	-0.104161	-0.00559693	0.0265231	-0.212088
35.1333	-0.548992	0.0528728	0.159119	-0.443613	-0.626994	0.0555895	-0.275657			35.1333	0.0962869	0.247506	0.206422	0.00257365	0.0932168	0.0204981	0.643877			35.1333	-0.307358	0.122468	0.0833759	0.115625	0.0671066	0.0791267	0.305999			35.1333	-0.287876	0.192109	0.0521626	0.0521626	-0.26787	0.0950418	-0.105613
35.1667	-0.348944	0.0351959	-0.128043	-0.248918	-0.151709	0.0495507	-0.346407			35.1667	0.169832	0.122524	0.412392	-0.0269021	-0.335926	0.108925	0.24647			35.1667	-0.173447	-0.129681	0.226588	-0.155786	-0.194246	0.0361255	0.174766			35.1667	-0.27595	0.0350227	0.00666894	0.0144125	-0.00324471	0.111386	-0.236287
35.2	-0.776391	-0.0136786	-0.0515963	-0.382099	-0.38413	0.0978614	-0.16111			35.2	0.000272104	0.427612	0.456579	-0.145203	-0.328095	-0.131262	0.461808			35.2	-0.153369	0.186522	0.411475	0.140778	0.0166661	0.669345	0.493297			35.2	-0.32453	-0.109846	0.0845889	-0.180146	-0.127325	0.147217	-0.232899
35.2333	-0.475499	-0.106423	0.0866378	-0.259953	-0.327463	-0.147315	-0.211645			35.2333	0.170901	0.438474	0.256835	0.00496361	-0.0764563	-0.118118	0.529583			35.2333	-0.161119	0.142802	0.180621	-0.112287	-0.300812	0.00924646	0.0909142			35.2333	-0.229115	0.119384	0.226878	-0.180146	-0.16496	0.0108077	-0.139492
35.2667	-0.778929	-0.323346	0.171578	-0.382474	-0.423579	-0.00238337	-0.0667765			35.2667	-0.0995319	0.452784	0.104326	-0.254742	0.000810259	-0.101388	0.177221			35.2667	-0.158584	0.178388	0.26051	-0.12458	-0.26866	0.0829264	0.167442			35.2667	-0.37311	0.136256	0.300442	-0.0673793	-0.149671	0.0736689	-0.0189818
35.3	-0.467597	-0.11674	0.112092	-0.384178	-0.299723	-0.200457	-0.538442			35.3	0.0403517	0.301759	0.267392	-0.149983	-0.235166	-0.211325	0.365477			35.3	-0.0997285	0.153986	0.326117	-0.137018	-0.157872	-0.119172	0.388355			35.3	-0.337911	-0.0121032	0.187676	-0.290492	-0.194363	0.142816	-0.242094
35.3333	-0.65011	0.22035	-0.0723546	-0.467624	-0.330368	-0.224613	-0.140895			35.3333	-0.109384	0.305528	0.306538	0.0607285	-0.220026	0.0826362	0.302743			35.3333	-0.252991	0.513908	0.207566	-0.0693846	-0.274427	0.128165	0.266676			35.3333	-0.270423	0.0158232	0.208487	-0.137556	-0.363723	-0.0746834	-0.155947
35.3667	-0.921307	0.0984886	-0.071802	-0.123365	-0.516594	-0.117121	-0.0465622			35.3667	-0.262497	0.601211	0.22908	-0.224071	-0.119788	-0.0153507	0.353983			35.3667	-0.26139	0.166187	0.259535	-0.11898	-0.0675375	-0.0491904	0.324067			35.3667	-0.403655	0.248543	-0.00688236	0.0357075	-0.251993	0.0900128	-0.116745
35.4	0.0685024	-0.228628	-0.195354	-0.351901	-0.437431	-0.300702	-0.275657			35.4	0.284415	0.256828	0.339532	-0.194197	-0.13023	0.108925	0.155041			35.4	-0.123954	-0.22627	0.216915	-0.136756	-0.155703	-0.221	0.2798			35.4	-0.150281	-0.00861237	0.227846	-0.283716	-0.298449	0.215107	-0.348085
35.4333	-0.400827	-0.0707673	-0.167659	0.0565362	-0.0625746	-0.322442	-0.295871			35.4333	0.196621	0.363289	0.340358	-0.0324786	0.02848	-0.228054	0.257723			35.4333	-0.355681	0.0370626	0.399831	0.102817	-0.199882	0.167132	0.140836			35.4333	-0.319003	0.0361863	0.208971	-0.261937	-0.136145	0.0240086	-0.282748
35.4667	-0.803072	-0.176835	0.562759	-0.201901	-0.286765	0.0857838	-0.181324			35.4667	0.157012	0.359569	0.275242	-0.0344702	-0.265446	0.315654	0.193139			35.4667	-0.286071	0.0329957	0.356729	-0.0492635	-0.0584693	0.256456	0.45121			35.4667	-0.338493	0.122874	-0.0499562	-0.0238215	-0.0843965	0.00263584	-0.162239
35.5	-0.606435	0.0385089	0.0194924	-0.370321	0.0226685	-0.141277	-0.0836217			35.5	-0.132446	0.643036	0.378628	-0.111744	-0.156333	0.0874161	0.119641			35.5	0.107902	0.247525	0.342471	-0.0151387	-0.232231	0.00184443	0.150477			35.5	-0.235224	0.101348	0.0303837	-0.157399	-0.261401	-0.00867923	-0.0727031
35.5333	-0.491847	-0.215095	0.16588	0.0100231	-0.338697	-0.0506941	-0.0398242			35.5333	-0.00577561	0.548278	0.258979	-0.178264	-0.217938	-0.149186	0.258852			35.5333	-0.557444	0.22414	0.215194	-0.20056	-0.259251	-0.0709722	0.0343186			35.5333	-0.272168	0.191527	0.139762	-0.0949659	-0.241407	0.0353236	-0.268713
35.5667	-1.00577	-0.283752	0.0124395	-0.48083	-0.302014	-0.25843	-0.427264			35.5667	-0.02027	0.735365	0.233264	-0.258725	-0.202275	0.135214	0.147295			35.5667	-0.367547	0.16822	0.186928	-0.17743	-0.251882	0.00791084	0.231887			35.5667	-0.389401	0.0193141	-0.0151099	-0.0814147	-0.402535	0.105099	-0.184017
35.6	-0.144292	-0.398542	-0.216208	-0.590837	-0.115571	0.00365552	0.411627			35.6	0.122603	0.767267	0.0797829	-0.238012	-0.142759	-0.169501	0.147097			35.6	-0.352853	0.0767149	0.502599	-0.0641732	-0.149858	-0.115981	0.201476			35.6	-0.440308	-0.0929734	0.158153	-0.209184	-0.18613	0.00577885	-0.276457
35.6333	-0.693072	0.0464516	0.0792368	-0.217286	-0.320817	-0.160601	0.162318			35.6333	0.236618	0.303346	0.0761218	-0.0731073	0.0472746	0.0838312	0.215104			35.6333	-0.20021	0.175338	0.246283	-0.155137	-0.217721	-0.022994	0.134487			35.6333	-0.263732	-0.076683	-0.0301133	-0.199505	-0.0314715	0.225164	-0.251774
35.6667	-0.842826	-0.0971708	-0.00273207	-0.304548	-0.376567	-0.248768	-0.339669			35.6667	-0.250859	0.587144	0.220991	-0.151577	-0.173039	0.026473	-0.0101258			35.6667	-0.385685	0.183471	0.186947	-0.219975	-0.28194	-0.246201	0.0873986			35.6667	-0.273041	0.288688	0.0666819	-0.0606037	-0.158492	0.217621	-0.00107472
35.7	-0.659683	-0.411812	0.256048	-0.0751715	-0.599127	0.193275	0.0309256			35.7	0.111924	0.501987	0.0560595	-0.178264	-0.181915	-0.37384	0.229211			35.7	-0.0623694	-0.0686772	0.457417	-0.0361011	-0.187618	-0.268521	0.0872558			35.7	-0.319003	-0.0249028	-0.0775428	-0.0998057	-0.239643	0.0372094	-0.285168
35.7333	-0.676593	0.071592	-0.0803499	-0.250226	-0.386228	-0.160601	-0.417156			35.7333	0.198656	0.273512	-0.0848932	0.00815018	0.259757	0.185403	0.103288			35.7333	-0.185033	0.266843	0.421878	-0.0475233	-0.109394	0.0834895	0.20581			35.7333	-0.273622	0.0548039	0.131051	-0.188857	-0.105566	0.114529	-0.0446325
35.7667	-0.219778	-0.157909	-0.0687874	-0.313785	-0.401813	-0.196834	0.256651			35.7667	-0.0794467	0.504525	0.20675	-0.00897767	-0.0983832	-0.18862	0.0610373			35.7667	-0.329184	0.207873	0.283892	-0.0011444	-0.128137	-0.273544	0.242633			35.7667	-0.256168	0.356176	0.165897	-0.185953	-0.13791	0.298083	-0.171918
35.8	-0.533722	0.109989	-0.0791858	-0.314394	-0.382767	-0.350221	-0.130788			35.8	0.174315	0.309815	0.269439	-0.0679292	-0.177738	-0.0141557	0.333772			35.8	-0.215986	0.113317	0.3869	-0.233672	-0.278397	-0.153005	0.193239			35.8	-0.14039	0.449265	0.259304	-0.205312	-0.397242	0.144073	-0.112873
35.8333	-0.204062	0.036091	0.490703	-0.46594	-0.609813	-0.45892	-0.0499313			35.8333	-0.0514167	0.368448	0.280495	-0.116923	-0.256049	0.0432024	0.46192			35.8333	-0.260353	0.0248618	0.24456	-0.358241	-0.218761	-0.211911	0.144016			35.8333	-0.287004	0.418429	0.115563	-0.115777	-0.217885	0.239622	-0.191761
35.8667	-0.517363	-0.303687	-0.039248	-0.0481094	-0.610823	-0.0386164	0.064616			35.8667	0.0505021	0.277961	-0.0258958	-0.289794	-0.290505	0.0157183	0.294652			35.8667	-0.45713	0.345131	0.144354	-0.144184	-0.133902	-0.0847496	0.0660378			35.8667	-0.174716	0.115311	0.132987	-0.253226	-0.126148	0.0962989	-0.166594
35.9	-0.249608	0.473591	-0.0333771	-0.434629	-0.338925	0.0821604	-0.268919			35.9	-0.212478	0.495794	0.118218	-0.392959	-0.239865	0.00974352	0.211015			35.9	0.15129	0.200756	0.277085	0.024683	-0.316472	-0.3726	0.222298			35.9	-0.186643	0.142074	0.182836	-0.0988377	-0.105566	0.122072	-0.374704
35.9333	-0.271717	-0.188976	-0.0229071	-0.325119	-0.118131	-0.417856	-0.656358			35.9333	-0.0473155	0.376161	0.0128939	-0.310108	0.0472746	0.173454	0.0476509			35.9333	0.0296164	0.479339	0.266967	-0.331064	-0.148498	0.199329	0.249765			35.9333	-0.225915	0.291596	0.187676	-0.113841	0.02557	0.312541	-0.231931
35.9667	-0.758673	0.0282728	-0.10861	-0.51928	-0.188362	-0.164224	0.0376636			35.9667	-0.417511	0.643609	0.197007	-0.0786838	-0.0691472	0.0121334	0.316711			35.9667	-0.272501	0.244475	0.326691	-0.201029	-0.289926	0.0245024	-0.0176383			35.9667	-0.194498	0.175236	0.0405472	-0.207732	-0.0444087	-0.00993639	-0.272585
36	-0.603095	-0.163572	0.380597	-0.381493	-0.490523	-0.176302	-0.912405			36	-0.013422	0.342268	0.203762	-0.15556	-0.00180011	0.000183796	0.202962			36	-0.376591	0.107217	0.339669	0.168645	-0.047528	-0.376758	0.192481			36	-0.309403	0.139747	-0.105129	-0.259518	0.00498807	-0.0363381	-0.158367
36.0333	-0.270657	-0.118777	0.373152	-0.52039	-0.563878	-0.282586	-0.1948			36.0333	0.453275	0.589037	0.332001	0.0870177	-0.184003	0.0778564	0.330004			36.0333	-0.209419	0.113317	0.046752	-0.0519	-0.212608	0.0843506	0.107899			36.0333	-0.240169	0.0705124	0.121855	-0.197085	-0.0820443	0.127101	-0.0581838
36.0667	-0.315732	-0.0332508	0.0396298	-0.467799	-0.535388	-0.0362008	-0.144264			36.0667	-0.044238	0.358627	0.204637	-0.0312836	-0.238298	-0.110948	0.483636			36.0667	-0.193791	0.26481	0.138848	-0.263678	-0.101734	0.448164	0.0527417			36.0667	-0.201188	0.314869	0.165413	-0.0543119	-0.215533	-0.135659	-0.225155
36.1	-0.174653	-0.238022	-0.0065112	-0.414835	-0.433478	-0.092966	0.064616			36.1	0.31794	0.287466	0.218887	-0.019334	-0.144325	-0.146797	0.293518			36.1	-0.336808	0.117384	0.0529663	-0.108344	-0.226037	0.266186	0.14971			36.1	-0.245405	0.217708	0.103464	-0.0262414	-0.0879248	0.0742976	-0.0359209
36.1333	0.0672897	0.212911	-0.0675425	-0.290311	-0.0872575	-0.121952	0.283603			36.1333	-0.119815	0.325283	0.361255	-0.194197	-0.217938	0.00496361	0.360808			36.1333	-0.227883	0.0817985	0.143683	-0.198443	-0.105002	0.00712005	0.177086			36.1333	-0.157844	0.03095	0.117015	-0.0809306	-0.20142	0.108871	-0.138524
36.1667	-0.657039	0.0387243	-0.170609	-0.0614541	-0.150554	-0.227028	-0.380097			36.1667	0.259377	0.568826	0.161047	-0.119711	-0.0341685	-0.0619543	0.353184			36.1667	-0.152295	0.181438	0.262974	-0.161248	-0.23591	-0.295001	0.0298992			36.1667	-0.326275	0.17	-0.00543045	-0.118197	-0.159668	0.29494	-0.193213
36.2	-0.686427	0.0990505	-0.221153	-0.345651	-0.355984	-0.30191	-0.0566694			36.2	0.387758	0.652421	0.442914	-0.210528	0.0378774	0.13402	0.0132523			36.2	-0.169307	0.127551	0.0547852	0.160547	-0.0655094	0.140605	0.295158			36.2	-0.359147	0.08913	0.137826	-0.148687	0.00498807	0.247794	-0.234351
36.2333	-0.65936	0.0428365	0.0302897	-0.286558	-0.500961	0.053174	0.414996			36.2333	0.25838	0.428304	0.384377	-0.0484113	-0.125531	0.155529	0.326636			36.2333	-0.296219	0.487473	0.350285	-0.0994697	-0.206199	0.0760013	0.428621			36.2333	-0.249478	0.15371	0.154281	-0.362604	-0.0567578	-0.161432	-0.0944819
36.2667	-0.0515567	0.121754	-0.036738	-0.405476	-0.209241	-0.227028	-0.444109			36.2667	0.00700382	0.362056	0.277684	-0.220486	-0.0618383	0.11968	0.146534			36.2667	0.0930377	0.132635	0.301164	-0.0350397	-0.124355	-0.123237	0.457156			36.2667	-0.217188	0.00186008	0.0487748	0.13589	-0.133205	0.24088	-0.153043
36.3	0.135762	-0.162374	-0.143936	-0.424756	-0.36862	-0.0434475	-0.0128719			36.3	0.137016	0.583055	0.143392	0.00615859	-0.271189	0.0228881	0.460823			36.3	-0.35686	0.286161	0.302565	0.0790203	-0.213786	-0.0103321	0.0635843			36.3	-0.25675	-0.104609	-0.09303	-0.134168	-0.197891	0.0227514	0.0178003
36.3333	-0.425421	0.131479	-0.0539667	-0.528995	-0.521427	0.170328	0.202747			36.3333	-0.0583112	0.352032	0.317476	0.0906026	-0.227857	-0.110948	0.170512			36.3333	-0.3459	-0.0290247	0.142805	0.105326	-0.0770018	-0.0445869	0.182184			36.3333	-0.259659	0.0757487	0.284955	-0.238223	-0.197303	-0.0470245	-0.2963
36.3667	-0.65311	-0.0800257	0.00661663	-0.264704	-0.147846	-0.217366	0.179163			36.3667	0.0737855	0.343403	0.418025	-0.258725	-0.306167	0.00974352	0.515165			36.3667	-0.210239	-0.00767351	0.41953	-0.188107	-0.167354	0.0738596	0.406357			36.3667	-0.398419	0.19269	0.1809	-0.288556	-0.0579339	0.0585822	-0.153043
36.4	-0.0288868	-0.396773	-0.162862	-0.431033	-0.501242	-0.326065	-0.201538			36.4	0.0730789	0.501486	0.361716	-0.177467	-0.314521	0.108925	0.506543			36.4	-0.137184	0.426469	0.225005	0.234241	0.0758121	0.570565	0.252156			36.4	-0.330639	0.156037	0.313509	-0.169982	-0.0714593	0.130873	-0.308883
36.4333	-0.286886	0.0868091	-0.0461927	-0.0596457	-0.516626	-0.228236	-0.140895			36.4333	-0.157348	0.569513	0.0535026	-0.0882435	-0.129185	0.00854854	0.237696			36.4333	-0.0589532	0.303445	0.225428	-0.0738209	-0.276449	0.327977	0.662781			36.4333	-0.409473	0.0158232	0.0221562	-0.263873	-0.421353	0.167961	-0.122552
36.4667	-0.611286	-0.136444	-0.082664	-0.479689	-0.216584	-0.272923	-0.0937288			36.4667	0.175642	0.599345	0.223992	-0.0213256	-0.203842	-0.00698597	-0.05241			36.4667	0.0599367	0.104167	0.298153	-0.0989732	-0.100856	0.165242	0.12356			36.4667	-0.288458	-0.0144303	0.294634	-0.148687	-0.167901	0.0227514	0.0294158
36.5	-0.600944	-0.0494073	-0.13294	-0.388293	-0.649743	-0.061564	-0.174586			36.5	0.0297893	0.732114	0.379958	-0.223673	-0.045654	-0.211325	0.319125			36.5	-0.243981	0.177371	0.195788	-0.0420314	-0.239977	-0.0549663	0.322622			36.5	-0.321912	0.267743	0.241397	-0.180146	-0.0873368	0.0302947	-0.105129
36.5333	-0.638645	0.140106	0.285233	-0.365373	-0.463074	-0.248768	-0.198169			36.5333	0.0952648	0.155087	0.351926	-0.0878451	-0.280064	-0.267488	0.00173508			36.5333	-0.137254	0.1001	0.184695	-0.233997	-0.0614879	0.243935	0.222786			36.5333	-0.202643	0.00127823	0.120403	-0.0388247	-0.306682	0.0830981	-0.171918
36.5667	-0.794648	-0.119844	-0.179718	-0.545423	-0.277301	0.00365552	-0.268919			36.5667	-0.0135038	0.430201	0.202717	-0.0452248	-0.231511	-0.069124	0.230724			36.5667	-0.478383	0.447821	0.319523	0.146214	-0.161157	0.0923178	0.195654			36.5667	-0.33093	0.24098	0.0952364	-0.0683472	-0.0879248	-0.00930781	0.0516787
36.6	-0.0432728	-0.0616264	-0.575876	-0.556432	-0.401955	-0.0917582	-0.272288			36.6	0.104528	0.627596	0.297658	-0.0273004	-0.245607	-0.175476	0.0455732			36.6	-0.216785	0.495607	0.318808	-0.204695	-0.37757	-0.0508031	0.383877			36.6	-0.272459	0.0937845	0.332868	-0.169498	-0.339613	0.105099	-0.343729
36.6333	-0.497373	-0.086139	-0.240897	-0.197581	-0.542384	-0.328481	-0.305978			36.6333	0.322758	0.498408	0.29948	-0.287802	-0.218982	0.102951	-0.0651946			36.6333	-0.12774	0.0299455	0.0564789	-0.0771083	-0.229581	-0.0956835	0.470196			36.6333	-0.298349	0.0769123	0.130083	-0.17579	-0.152023	0.249052	-0.181114
36.6667	-0.885429	-0.15413	-0.314988	-0.546274	-0.497724	-0.183549	-0.107205			36.6667	0.394339	0.401925	0.371576	-0.295769	-0.13545	0.0742715	0.212121			36.6667	-0.114781	0.205839	0.317323	0.0854101	-0.313753	0.221781	0.239937			36.6667	-0.181698	-0.0947188	-0.0310811	-0.17337	-0.103214	0.117672	-0.210152
36.7	-0.21248	-0.0284033	0.125207	-0.578681	-0.211399	-0.164224	-0.585608			36.7	0.235442	0.272257	0.379535	-0.211325	-0.108825	-0.0201305	0.197444			36.7	-0.348382	0.15907	0.231907	0.247679	-0.107437	0.087092	0.310038			36.7	-0.203806	0.00767805	-0.0126901	-0.113841	-0.150259	0.0893842	-0.330662
36.7333	-0.413091	0.020479	0.13488	-0.271814	-0.220645	-0.272923	-0.00613381			36.7333	-0.0234508	0.574855	0.156024	-0.145203	-0.128663	-0.0249105	0.177729			36.7333	-0.25485	0.350215	0.335543	-0.0631321	-0.0868817	0.0786933	0.0577226			36.7333	-0.188679	0.0664399	0.136858	-0.053828	-0.307858	0.0566964	-0.323886
36.7667	-0.486735	0.088318	-0.0623728	-0.526897	-0.552639	0.177574	-0.191431			36.7667	-0.262881	0.627719	0.317301	-0.0798787	-0.0858535	0.00854854	0.285691			36.7667	-0.25048	0.228208	0.305773	-0.0386958	-0.142878	-0.0311763	0.660589			36.7667	-0.355365	-0.23726	0.0173164	-0.117229	-0.136734	-0.247552	-0.12594
36.8	-0.590173	0.413698	0.0810052	-0.536102	-0.246043	-0.179925	-0.279026			36.8	-0.110492	0.549407	0.32797	-0.168704	-0.330183	0.11251	0.37946			36.8	-0.060268	0.284127	0.376443	-0.326943	-0.305745	0.148353	0.102525			36.8	-0.403655	0.188036	0.147506	0.00521703	-0.227882	-0.00239311	-0.073671
36.8333	-0.41089	0.208118	0.300017	-0.289071	-0.289584	-0.245145	-0.26555			36.8333	-0.206567	0.443279	0.347989	-0.18145	-0.444516	0.0611269	0.347637			36.8333	-0.16634	0.177371	0.013893	-0.00229177	0.0493577	0.116076	-0.0909608			36.8333	-0.19857	0.0809849	0.298022	-0.178694	-0.269046	0.321971	-0.0775428
36.8667	0.203885	-0.0609718	-0.0690025	-0.368183	-0.441863	-0.195626	-0.252074			36.8667	0.190259	0.632899	0.400281	0.0659067	-0.234644	-0.0344701	0.161145			36.8667	0.0798027	0.216007	0.640186	-0.288312	-0.102473	-0.0203109	-0.0954347			36.8667	-0.335875	0.329995	0.190096	-0.280328	-0.112623	0.126472	-0.161754
36.9	-0.0047306	-0.139336	0.685445	-0.655872	-0.341094	-0.28017	0.29708			36.9	-0.209318	0.468397	0.164428	-0.0500047	-0.203319	-0.127677	0.187364			36.9	-0.0913238	0.256676	-0.0131424	0.0114027	-0.0958942	0.180798	0.303868			36.9	-0.269841	0.119384	0.380782	-0.171918	-0.359019	0.169847	-0.217896
36.9333	0.150228	0.317077	-0.156912	-0.281944	-0.235505	-0.256015	0.0208185			36.9333	-0.0204587	0.323549	0.291455	-0.0360634	-0.122398	-0.0607593	0.3677			36.9333	-0.144005	0.343098	0.41714	-0.254265	-0.171099	0.219377	0.213803			36.9333	-0.269259	0.423665	0.0661979	-0.29388	-0.29198	0.20442	-0.119649
36.9667	-0.284166	-0.000695318	0.184124	-0.113464	-0.614467	-0.0724339	0.381306			36.9667	-0.000162667	0.284689	0.106302	-0.0340718	0.0754664	-0.0559795	-0.167582			36.9667	-0.0540034	0.206856	0.569718	0.0147286	-0.124163	0.014317	0.0122983			36.9667	-0.0542837	0.203163	0.209455	-0.17095	-0.176133	0.337686	-0.0814147
37	-0.231613	-0.16652	0.136927	-0.0881013	-0.353879	0.0459273	-0.134157			37	0.105075	0.570942	0.509202	-0.100193	-0.291027	0.0479823	0.199266			37	-0.526512	0.250575	0.342614	-0.170184	-0.28142	-0.195892	0.0779575			37	-0.209042	0.1892	0.172673	-0.198537	-0.24964	0.153503	-0.257582
37.0333	-0.0951929	0.194686	-0.0428788	-0.344011	-0.378846	-0.0869271	0.684519			37.0333	-0.116919	0.404508	0.326962	-0.0607593	0.0624147	-0.372645	0.0998706			37.0333	-0.295733	0.27091	0.138828	-0.268738	-0.145251	-0.351363	0.48047			37.0333	-0.326857	0.251452	0.0574863	-0.119649	-0.185542	-0.0250232	-0.248386
37.0667	-0.576585	-0.389491	-0.0836148	-0.558414	-0.363292	-0.0869271	-0.336299			37.0667	-0.25196	0.332295	0.578669	-0.0456231	-0.250306	-0.00818095	0.215751			37.0667	-0.35339	0.189572	0.274769	-0.0659839	-0.110472	-0.155606	0.328265			37.0667	-0.235514	0.336977	0.401109	-0.126908	-0.214357	0.123958	-0.181597
37.1	-0.221986	0.370552	0.198232	-0.572332	-0.558964	-0.121952	-0.100467			37.1	-0.223334	0.394354	0.404689	-0.0926251	-0.0482644	0.00735357	0.210097			37.1	-0.398998	0.346148	0.131684	0.00449556	-0.217528	0.0910082	0.425482			37.1	-0.216897	0.595878	0.248173	-0.167078	-0.139674	0.144702	-0.133684
37.1333	-0.417676	-0.0912817	-0.296001	-0.413332	-0.490044	-0.248768	-0.0634074			37.1333	0.30607	0.415283	0.366998	-0.169501	-0.0007559	0.279805	0.383651			37.1333	-0.110879	0.229224	0.488087	-0.156466	-0.0852553	-0.0835303	0.0451395			37.1333	-0.30853	0.0809849	0.304314	-0.0330171	-0.301977	-0.185319	-0.380995
37.1667	-0.795477	-0.196564	-0.113631	-0.36062	-0.162602	-0.195626	-0.366621			37.1667	-0.147903	0.581954	0.321547	0.036431	0.0180386	0.0754664	0.0141909			37.1667	-0.186807	-0.00767351	0.0568308	-0.0967127	-0.0989149	0.264066	0.293418			37.1667	-0.172098	-0.0441021	0.261724	0.0419991	-0.18025	0.110129	-0.192245
37.2	-0.243763	-0.466004	-0.216863	-0.530807	-0.484039	-0.0639795	-0.026348			37.2	0.332311	0.321034	0.23617	-0.0209273	-0.0440878	0.0766614	0.329807			37.2	0.105308	0.114334	0.301747	-0.00718936	-0.214258	0.201162	0.495444			37.2	-0.26955	0.24098	0.115079	-0.0243055	-0.0867487	0.118929	-0.231447
37.2333	-0.215867	-0.252483	-0.0692794	-0.446167	-0.516745	-0.136446	0.0814612			37.2333	0.215646	0.514755	0.397027	-0.115728	-0.194444	0.252321	0.161255			37.2333	-0.115561	-0.0513928	0.0912058	-0.0305165	-0.243762	-0.420542	0.135979			37.2333	-0.259659	0.208981	0.064262	-0.0702832	-0.134969	0.220136	-0.156915
37.2667	-0.53739	-0.047411	0.215988	-0.373611	-0.458588	0.0604206	-0.0802527			37.2667	-0.189636	0.714333	0.331806	-0.19101	-0.139105	-0.196985	0.237746			37.2667	-0.43181	0.0889157	0.298026	-0.270936	-0.0774918	0.00154034	0.172021			37.2667	-0.317548	0.108911	0.0739416	-0.151107	-0.182014	-0.124344	-0.185469
37.3	-0.0879267	-0.0253991	0.155243	-0.180766	-0.217299	-0.425102	0.0241875			37.3	-0.00145211	0.447795	0.0847359	-0.250758	-0.00441048	-0.0153507	0.133624			37.3	-0.272635	0.235324	0.411293	-0.134262	-0.081368	0.044551	0.483685			37.3	-0.307367	0.0228049	0.0410312	-0.182082	-0.266694	-0.0614826	0.0753935
37.3333	-0.455501	-0.253736	-0.265513	-0.168475	-0.378439	-0.249976	0.15558			37.3333	-0.184555	0.491716	0.281004	-0.142017	-0.0978612	0.0910009	0.205434			37.3333	-0.389826	0.204823	0.0992985	-0.246188	-0.268624	0.0167852	0.143044			37.3333	-0.377765	0.375376	0.1054	-0.181114	-0.239643	0.17299	-0.092062
37.3667	-0.387276	0.320057	-0.185894	-0.335785	-0.107707	-0.297079	-0.383466			37.3667	0.0884871	0.560488	0.19737	-0.00818095	-0.0644486	0.0635168	0.433246			37.3667	-0.102416	-0.0808779	0.120183	-0.140934	-0.365516	-0.180697	0.381362			37.3667	-0.294276	0.181055	0.352227	-0.073187	-0.147907	0.0265231	-0.0402767
37.4	-0.529881	-0.256031	0.0995163	-0.482938	-0.214076	-0.252391	-0.0634074			37.4	0.205943	0.371457	0.269365	0.0224897	-0.232555	0.0635168	0.283003			37.4	-0.256625	0.0868823	0.516127	-0.0260403	-0.199302	-0.187421	0.0372977			37.4	-0.328893	0.278215	0.264144	-0.165142	-0.110859	0.233965	-0.144815
37.4333	-0.47114	-0.250549	0.110811	-0.511339	-0.715231	-0.1449	0.367829			37.4333	0.0064633	0.670331	0.525454	-0.167908	-0.149546	-0.139627	0.12489			37.4333	-0.46701	-0.0381753	0.145229	-0.183805	-0.285926	0.178256	0.141041			37.4333	-0.254714	0.121129	0.131535	-0.134652	-0.293156	0.121443	-0.164174
37.4667	-0.635663	-0.329404	-0.136668	-0.376644	-0.273323	-0.392493	-0.167848			37.4667	-0.000925644	0.284571	0.414981	-0.140025	-0.295726	0.161504	0.411238			37.4667	-0.117605	0.146869	0.369363	0.0414422	-0.296956	-0.107539	0.523745			37.4667	-0.227078	0.129856	0.330933	-0.053828	-0.100274	-0.030052	-0.168046
37.5	0.255082	0.187091	0.0150376	-0.505342	-0.416706	-0.440803	0.276865			37.5	0.18368	0.261552	0.182849	-0.170696	-0.356286	-0.0428348	0.01294			37.5	-0.231362	0.16212	0.16708	-0.228261	-0.278781	-0.12899	0.0135874			37.5	-0.401618	0.15371	-0.0272093	-0.244998	-0.0732235	0.147845	-0.186437
37.5333	-0.478228	0.24487	-0.110212	-0.328783	-0.675945	0.143757	0.0444018			37.5333	-0.0134253	0.42346	0.15407	-0.303735	0.0509291	0.1149	0.112585			37.5333	-0.100717	0.213973	0.325826	-0.309797	-0.065533	0.0655296	0.162318			37.5333	-0.330639	0.121711	0.177512	-0.115293	-0.140262	0.034695	0.149442
37.5667	-0.10691	-0.176389	-0.0231894	-0.170002	-0.519954	0.124432	-0.151002			37.5667	-0.0971089	0.538515	0.403621	-0.167908	-0.0926404	0.00615859	0.111338			37.5667	-0.467689	0.150936	0.319636	-0.0703884	0.0234439	0.401763	0.525227			37.5667	-0.297767	-0.0202484	0.064746	-0.122552	-0.267282	0.065497	-0.120133
37.6	-0.00449136	-0.0552511	0.207361	-0.485687	-0.292438	-0.253599	-0.0364552			37.6	0.173465	0.224461	0.403785	-0.0914301	-0.149024	-0.0559795	-0.0244022			37.6	-0.0693591	0.296328	0.206473	-0.140364	-0.21903	0.0753936	0.165092			37.6	-0.312894	0.301487	0.00424902	-0.0112382	-0.220238	0.00389301	-0.33647
37.6333	-0.66007	-0.0684751	-0.364896	-0.323901	-0.863892	-0.326065	0.256651			37.6333	0.306094	0.677393	0.959444	-0.0508013	-0.156333	0.0874161	0.405759			37.6333	-0.160667	0.341064	0.107675	-0.255947	0.064191	0.280731	0.0847852			37.6333	-0.206715	0.0676035	0.171705	-0.0451165	-0.113211	0.144073	-0.255162
37.6667	-0.0952859	0.0156681	-0.0808468	-0.466678	-0.0134678	0.138926	-0.871977			37.6667	0.0227409	0.440036	1.08132	-0.332414	-0.193922	0.125655	0.447788			37.6667	-0.113286	0.0868823	0.427599	-0.127001	-0.178999	0.302965	0.374454			37.6667	-0.21137	0.186291	0.0463549	-0.00204263	-0.31021	0.149731	-0.112389
37.7	-0.56259	0.165356	0.0208773	-0.537471	-0.262083	-0.336935	0.0949373			37.7	0.199309	0.654546	1.73763	-0.256733	-0.116656	-0.0201305	0.900708			37.7	-0.146435	0.314629	0.315147	0.235269	-0.106776	0.312921	0.511441			37.7	-0.244242	0.119384	0.17848	0.154281	-0.0702832	0.196877	-0.00204263
37.7333	-0.358044	-0.324008	0.185835	-0.536636	-0.467809	-0.468582	0.222961			37.7333	0.166171	0.561794	1.6051	-0.072709	-0.183481	-0.0894384	0.806814			37.7333	-0.0803451	0.141786	0.439681	0.0468665	-0.137547	0.227452	0.198195			37.7333	-0.279149	0.134511	0.0603902	-0.29146	-0.0849846	0.150988	0.00231311
37.7667	-0.645897	-0.0196594	0.287853	-0.38248	-0.333251	-0.266885	-0.609192			37.7667	0.467295	0.726747	1.567	-0.0635476	-0.131274	-0.136042	0.309012			37.7667	-0.123056	0.241425	0.230905	-0.0115767	-0.174783	-0.0204425	0.186751			37.7667	-0.303294	0.175818	0.0632941	-0.09303	-0.0767518	0.20882	-0.13804
37.8	-0.826318	0.0631291	-0.192947	-0.434796	-0.339155	-0.140069	0.0949373			37.8	-0.0444394	0.476997	1.05361	0.0467873	-0.21846	-0.138432	0.408027			37.8	-0.183075	-0.0412255	0.248579	-0.0396596	-0.241846	-0.189884	0.516959			37.8	-0.167153	-0.0132667	0.115079	-0.252742	-0.284924	0.255966	-0.154495
37.8333	-0.228919	0.187598	-0.146415	-0.269073	-0.532471	-0.129199	-0.295871			37.8333	-0.146981	0.615899	1.19134	-0.0464198	-0.317653	0.10773	0.604497			37.8333	-0.00520488	-0.00462334	0.020133	-0.00974897	-0.158527	0.326385	0.0735611			37.8333	-0.252096	0.339886	0.131535	-0.159335	-0.240819	0.209449	-0.137556
37.8667	-0.184666	0.0432	-0.0766739	-0.232351	-0.354425	-0.126783	-0.51149			37.8667	0.171336	0.19422	1.01848	-0.133254	-0.138583	-0.169501	0.70494			37.8667	-0.0541208	0.26481	0.382021	-0.114826	-0.204889	0.176594	0.395811			37.8667	-0.287004	0.336395	0.258336	-0.333082	-0.144966	0.0749262	-0.172886
37.9	-0.286961	-0.123934	0.0804228	-0.513552	-0.391298	-0.256015	-0.218383			37.9	0.0329267	0.405661	1.18301	-0.0133591	-0.249262	0.0467873	0.396871			37.9	-0.120637	0.0289288	0.38132	0.174264	-0.258145	0.0727013	0.251909			37.9	-0.25995	-0.115082	0.259788	-0.232415	-0.107331	0.171104	-0.272585
37.9333	-0.79248	-0.27979	-0.0511314	-0.628597	-0.667176	-0.204081	0.162318			37.9333	-0.216544	0.961539	0.681723	-0.178662	-0.20593	0.0969757	0.197384			37.9333	-0.282965	0.136702	0.109363	-0.120333	-0.200959	0.138856	0.0190231			37.9333	-0.216024	0.0239685	-0.0305972	-0.0717351	-0.123796	0.0717831	-0.152559
37.9667	-0.42853	-0.189216	-0.32087	-0.291894	-0.380121	-0.271716	-0.255443			37.9667	-0.264244	0.762457	0.724087	-0.165518	-0.256571	-0.0464198	0.0944118			37.9667	-0.260078	0.204823	0.125147	-0.149458	-0.0309061	0.159709	0.256109			37.9667	-0.293113	0.0437497	0.114112	-0.16853	-0.320795	0.198763	-0.171918
38	0.21326	0.12522	-0.0455611	-0.486534	-0.185733	-0.239106	-0.191431			38	0.132651	0.368575	0.788636	0.0121334	-0.392309	-0.283022	0.336151			38	-0.343829	0.15602	0.0350637	0.0214402	-0.254392	-0.0908236	0.800648			38	-0.211952	0.438792	0.259788	-0.0465684	-0.337261	0.0642398	-0.340341
38.0333	-0.349708	0.354711	-0.247109	-0.485571	-0.348573	-0.0156688	-0.221752			38.0333	-0.180408	0.580939	0.669075	-0.127677	-0.214805	-0.187425	0.893332			38.0333	-0.0522234	0.0492633	0.329906	0.287172	-0.263792	-0.152953	0.090561			38.0333	-0.291367	0.325923	0.15283	-0.277909	-0.200832	0.255338	-0.21596
38.0667	-0.58894	0.00958958	0.338333	-0.494626	-0.287762	0.068875	0.0174495			38.0667	-0.115585	0.441147	0.672463	-0.25992	-0.200709	-0.20057	0.95694			38.0667	-0.0964451	0.117384	0.222165	-0.166551	-0.0822742	0.167487	0.34317			38.0667	-0.238132	0.456246	0.212359	-0.12594	-0.331968	0.0422384	-0.210152
38.1	0.0792242	0.15249	0.126645	-0.618984	-0.185188	-0.143692	0.0915683			38.1	-0.302189	0.314474	0.573255	0.0858228	-0.262313	-0.19818	0.0320603			38.1	-0.183253	0.217023	0.287551	-0.113312	-0.164214	-0.201332	0.533676			38.1	-0.240751	0.233416	0.064262	-0.183533	-0.219649	0.0573251	-0.183049
38.1333	-0.478214	-0.0289148	-0.0553442	-0.375698	-0.469835	0.0700828	0.0983063			38.1333	-0.00768495	0.529824	0.450896	-0.0970065	-0.158421	-0.0631493	0.125747			38.1333	-0.201758	0.22109	0.180538	-0.0766624	-0.129341	0.0102921	-0.0026938			38.1333	-0.224169	-0.0254845	0.17606	-0.120133	-0.324323	0.291169	-0.207248
38.1667	-0.386521	-0.253584	0.261232	-0.572443	-0.422675	-0.224613	0.064616			38.1667	-0.233017	0.487952	0.815433	-0.0735056	-0.211151	-0.0750988	0.527029			38.1667	-0.275507	-0.0788444	0.555219	-0.299858	-0.284631	0.215566	0.392312			38.1667	-0.299803	0.214799	0.0531306	-0.00204263	-0.0955696	0.235851	-0.269197
38.2	-0.61581	0.00163513	0.163157	-0.401341	-0.498408	-0.315195	-0.0937288			38.2	0.158611	0.27757	0.790606	-0.0683274	-0.129185	0.00974352	0.644247			38.2	-0.326231	0.233291	0.183696	0.12991	-0.184032	0.0158345	0.262652			38.2	-0.307949	0.21189	-0.0252734	-0.183533	-0.0738115	0.214478	-0.113357
38.2333	-0.108776	-0.279844	-0.235791	-0.318016	-0.761293	-0.0905505	-0.420525			38.2333	0.323774	0.753084	0.381232	-0.149585	-0.126053	-0.118118	0.460356			38.2333	-0.048935	-0.0442757	0.671655	-0.0273538	-0.14395	0.0883688	0.380344			38.2333	-0.202352	0.256107	0.290762	-0.188857	-0.114387	0.190591	-0.169982
38.2667	-0.582335	0.0117185	-0.28242	-0.343894	-0.458411	-0.136446	-0.302609			38.2667	-0.285751	0.589877	0.48455	-0.169899	-0.150068	0.0790514	0.384647			38.2667	-0.226806	-0.0351252	0.340981	-0.196175	0.0078223	-0.230562	0.132379			38.2667	-0.333548	0.391666	0.286407	-0.129812	-0.155551	0.0862411	-0.237739
38.3	-0.0398358	-0.0788998	0.2247	-0.385429	-0.415835	-0.293455	-0.309347			38.3	0.16058	0.228679	0.532453	-0.164323	-0.326528	-0.238809	0.653863			38.3	-0.433973	0.194655	0.101417	-0.143503	-0.286735	-0.0116994	0.327024			38.3	-0.152026	0.0734215	0.169769	-0.108517	0.0108686	0.193105	-0.105129
38.3333	0.0949212	-0.186054	0.0493068	-0.495848	-0.500095	-0.167848	-0.029717			38.3333	0.282221	0.327942	0.582363	-0.35472	-0.121354	-0.108558	0.197357			38.3333	-0.406965	0.0960328	0.317065	-0.37929	-0.168959	-0.0554631	-0.00956249			38.3333	-0.325403	0.1892	0.262208	-0.194181	-0.22847	0.343343	-0.13562
38.3667	-0.705774	-0.29447	0.130917	-0.296932	-0.556343	-0.0917582	-0.0128719			38.3667	-0.0776707	0.195386	0.681839	-0.0209273	-0.295726	-0.104973	0.520561			38.3667	-0.237671	-0.0269913	0.117042	0.0454551	-0.107399	0.45723	0.0432614			38.3667	-0.164535	0.0262957	0.304798	-0.162722	-0.231411	0.284882	-0.239191
38.4	-0.499657	-0.0055344	0.0591033	-0.39085	-0.499047	-0.332104	-0.144264			38.4	0.252983	0.429462	0.527415	-0.0838619	-0.194444	-0.0559795	0.2147			38.4	-0.195995	0.311579	0.438721	0.148167	-0.225851	-0.277124	0.118774			38.4	-0.245405	0.0268775	0.329481	-0.275489	-0.159668	0.203163	-0.355829
38.4333	-0.750428	-0.342504	0.0281564	-0.12306	-0.347062	-0.23669	-0.0735146			38.4333	-0.0229004	0.188065	0.551214	0.0236847	0.0248255	0.193768	0.137529			38.4333	-0.31112	0.0797651	0.249193	-0.0120555	-0.23213	-0.0181837	0.122417			38.4333	-0.223006	0.266579	-0.0102702	-0.102709	-0.100274	0.0522961	-0.180146
38.4667	-1.03597	-0.49976	0.0462242	-0.440074	-0.535268	0.00244771	0.374567			38.4667	0.102132	0.64778	0.592927	-0.0253088	-0.248218	-0.0750988	0.502555			38.4667	-0.196943	0.135685	0.358514	0.153192	-0.0571019	0.113896	0.32792			38.4667	-0.336748	0.208981	-0.00349454	-0.161754	-0.0344117	0.0422383	-0.0678632
38.5	-0.477842	-0.0307095	-0.109485	-0.573295	-0.385249	-0.44805	-0.00276479			38.5	0.43663	0.755996	0.752728	0.0917976	-0.35211	-0.0201305	0.390389			38.5	-0.217452	0.160087	0.165798	-0.0281132	-0.0966266	0.367549	0.267883			38.5	-0.330639	0.114147	0.043935	-0.305979	-0.129677	-0.0199942	0.0594223
38.5333	-0.712062	-0.0457001	-0.184977	-0.525411	-0.533025	-0.353844	-0.0903598			38.5333	0.17292	0.252992	0.323522	0.0220914	0.179359	-0.0464198	0.384694			38.5333	-0.214608	0.181438	0.342415	-0.0468754	-0.0307574	0.116439	0.233852			38.5333	-0.319875	0.448101	0.220586	-0.0760909	-0.288452	0.0717832	-0.152559
38.5667	-0.422385	0.155759	-0.0195792	-0.439707	-0.286696	0.0459273	0.320663			38.5667	0.0632898	0.497406	0.491195	-0.255937	-0.268056	-0.0739039	0.342479			38.5667	-0.150647	0.261759	0.232756	-0.0716625	-0.121306	-0.17717	0.162137			38.5667	-0.22766	0.122293	0.203163	-0.188857	-0.304329	-0.0665115	-0.0906101
38.6	-0.324182	-0.0401093	-0.0562298	-0.244362	-0.281761	-0.15577	-0.413787			38.6	0.12691	0.638786	0.498925	-0.120508	-0.159988	0.00137877	0.434287			38.6	0.0427327	0.0248618	0.487462	-0.321285	0.0132402	0.323564	0.0824285			38.6	-0.186061	0.183382	0.0139286	-0.0654434	-0.234351	0.117043	-0.340825
38.6333	-0.478787	-0.0656852	-0.125902	-0.490383	-0.523188	-0.213743	0.0208185			38.6333	-0.114622	0.420744	0.459051	0.0376259	-0.111435	-0.0631493	0.403239			38.6333	-0.134096	0.296328	0.0926676	-0.0917628	-0.00473709	0.279084	0.295862			38.6333	-0.238424	0.154292	0.0158645	-0.0862544	-0.0720474	0.0981848	-0.235803
38.6667	-0.55099	-0.114121	-0.101274	-0.259948	-0.670649	-0.163017	-0.248704			38.6667	0.0436374	0.290657	0.783172	-0.156356	-0.234644	-0.112143	0.386074			38.6667	-0.268987	0.430536	0.341554	0.0150002	-0.123269	0.105339	0.137322			38.6667	-0.172098	0.170582	-0.00204263	-0.0155939	-0.279043	0.313799	-0.0417286
38.7	-0.606354	0.197815	0.141317	-0.352425	-0.238064	-0.628007	-0.305978			38.7	-0.0175679	0.371365	0.387704	-0.0910317	-0.165208	-0.315286	0.392565			38.7	-0.26095	0.143819	0.0356994	0.0836353	0.219416	-0.103902	0.114094			38.7	-0.323366	-0.0313026	0.197355	-0.0891582	-0.134381	0.0126935	-0.0712511
38.7333	-0.833731	0.0148684	-0.213984	-0.546962	-0.358724	-0.294663	0.0107114			38.7333	-0.064023	0.637986	0.164443	-0.0898367	-0.190268	-0.071514	0.304229			38.7333	-0.241982	0.0106276	0.322872	-0.13066	-0.112058	-0.065797	0.192692			38.7333	-0.316966	0.245634	0.283019	-0.149655	-0.341965	0.107614	-0.212572
38.7667	0.127387	-0.146165	0.125449	0.104781	-0.483011	-0.275339	-0.0499313			38.7667	0.00458791	0.269727	0.377819	-0.259123	-0.129185	-0.176671	0.482174			38.7667	0.0292703	0.554577	0.404977	-0.30515	0.00958305	0.34504	0.0486004			38.7667	-0.193043	0.123456	0.0928166	-0.237255	0.0908442	0.249052	0.0792652
38.8	-0.433904	0.116262	0.745667	-0.350255	-0.280497	-0.487906	-0.0836217			38.8	0.171896	0.283922	0.5809	0.144376	-0.27902	-0.0655391	0.375037			38.8	-0.189995	0.0146945	0.134386	-0.14758	0.0542969	0.377393	0.186857			38.8	-0.253259	0.32825	0.256884	-0.21112	-0.155551	0.149731	-0.280813
38.8333	-0.225159	-0.393186	-0.356394	-0.530832	-0.320659	-0.313988	0.455425			38.8333	0.308751	0.269947	0.470063	-0.00618936	-0.265446	0.0921959	0.660193			38.8333	-0.129914	0.178388	0.605805	-0.230407	-0.140331	0.225549	0.298125			38.8333	-0.279149	0.0705124	-0.0320491	-0.150139	-0.223178	0.176133	-0.110937
38.8667	-0.637861	-0.353604	0.133484	-0.431641	-0.534121	-0.0639795	0.0612469			38.8667	-0.108922	0.69921	0.37511	-0.233232	-0.123443	-0.109753	0.254372			38.8667	0.0335721	0.229224	0.443789	0.444136	-0.0655899	0.391538	0.256958			38.8667	-0.22766	0.0257138	-0.00349454	-0.179178	-0.13791	0.0177225	-0.352441
38.9	-0.476091	-0.0391126	-0.0447005	-0.48591	-0.422624	-0.190795	0.0612469			38.9	0.0169481	0.47333	0.303209	-0.225266	-0.131274	-0.130067	0.151306			38.9	0.133139	0.476289	0.412708	0.17867	-0.175611	0.183402	0.121641			38.9	-0.27624	0.0769123	-0.0760909	-0.00833427	-0.198479	0.377289	-0.092546
38.9333	-0.825057	-0.267388	-0.0254001	-0.526968	-0.286203	-0.34539	-0.117312			38.9333	0.0139634	0.426246	0.210636	-0.00618936	0.149079	-0.102583	0.142409			38.9333	-0.173685	0.234308	0.386893	0.152022	0.0723505	-0.102977	0.326417			38.9333	-0.348384	0.35734	0.393849	-0.0717351	-0.153199	0.286768	-0.105129
38.9667	-0.869552	-0.395359	-0.242564	-0.476722	-0.341319	-0.115914	-0.373359			38.9667	-0.0480834	0.284405	0.475247	-0.252352	-0.174084	-0.146797	0.406998			38.9667	-0.240913	0.358349	0.335023	-0.114996	-0.0378785	0.136842	0.297362			38.9667	-0.291658	0.0809849	0.187676	-0.0310811	-0.0579339	0.0874984	0.0352235
39	-0.640559	-0.259919	-0.0759855	-0.351503	-0.73556	-0.243937	-0.0600384			39	0.031289	0.47421	0.212862	-0.1934	-0.210106	-0.0249105	0.204371			39	0.122082	0.187538	0.164296	0.11638	-0.0670979	0.27527	0.275087			39	-0.207588	0.27007	0.260756	-0.102225	-0.102626	-0.0313092	-0.0765748
39.0333	-0.507929	0.457379	-0.140557	-0.306739	-0.597401	-0.12316	-0.113943			39.0333	-0.123027	0.512438	0.306723	-0.25036	0.0143842	0.106536	0.197677			39.0333	0.116121	0.417319	0.184721	-0.363962	-0.0943716	0.220245	0.384846			39.0333	-0.197116	0.0833121	0.344	-0.242094	-0.336085	0.25408	-0.216928
39.0667	-0.925351	-0.122852	0.0676082	-0.319257	-0.396061	-0.0337854	0.0241875			39.0667	-0.0640672	0.483875	0.283936	-0.234029	-0.111957	0.0862211	0.18516			39.0667	-0.104948	0.132635	0.353074	-0.137119	0.010145	-0.144067	0.140458			39.0667	-0.206134	0.158946	0.126211	-0.172402	-0.068519	0.271682	-0.138524
39.1	-0.50012	-0.380564	-0.156268	-0.345971	-0.316408	-0.379207	-0.292502			39.1	0.277114	0.488758	0.402313	-0.00937593	-0.213239	-0.112143	0.220563			39.1	-0.332307	0.231258	0.296393	-0.290969	-0.0878574	-0.180655	0.260945			39.1	-0.193625	-0.00221255	0.206551	-0.144331	-0.172605	0.247166	-0.128844
39.1333	-0.326791	0.00044283	0.158452	-0.333304	-0.263741	-0.0808883	0.0511399			39.1333	0.0869007	0.465605	0.326628	-0.157153	-0.24874	0.123265	0.258131			39.1333	-0.105977	0.325813	0.300472	-0.0656643	-0.221476	-0.0107261	0.215911			39.1333	-0.249187	0.200254	0.183804	-0.179662	-0.0820443	0.411862	-0.0272093
39.1667	-0.346523	-0.104057	0.0019077	-0.323241	-0.296342	-0.0784727	-0.0162409			39.1667	0.149489	0.423636	0.19668	-0.163526	-0.21846	0.0121334	0.125534			39.1667	0.0696985	0.286161	0.501661	0.0774288	-0.0969808	0.262015	0.31179			39.1667	-0.330639	0.25727	0.130567	-0.0939979	-0.306682	0.138416	-0.0354369
39.2	-0.0206205	-0.119642	-0.27863	-0.376143	-0.364833	-0.175094	-0.245336			39.2	0.189664	0.286736	0.193894	-0.216503	-0.202275	0.169869	0.358907			39.2	-0.148648	0.410202	0.334432	-0.135545	0.0792544	-0.321422	0.132981			39.2	-0.287295	0.299742	0.174124	-0.177726	-0.339613	-0.00365027	-0.117713
39.2333	-0.96049	0.0803397	0.309052	-0.443689	-0.741331	-0.224613	-0.0364552			39.2333	0.0991777	0.825758	0.269812	-0.107761	0.00237652	0.142384	0.335924			39.2333	-0.252522	-0.00564007	0.276019	-0.30798	0.0768745	0.0790596	0.117245			39.2333	-0.135445	0.388176	0.189612	-0.0412446	-0.362547	0.02338	-0.184985
39.2667	-0.559494	-0.174356	-0.0621038	-0.668342	-0.1204	-0.183549	-0.0802526			39.2667	0.215134	0.824063	0.388797	-0.107363	-0.109869	-0.0822686	0.424899			39.2667	-0.244072	0.411218	0.348535	0.0172209	-0.0540486	-0.0246652	0.274793			39.2667	-0.124391	0.183382	0.430147	-0.139492	-0.180838	0.178647	-0.1332
39.3	-0.0180516	0.103004	-0.0228984	-0.242201	-0.708125	-0.092966	-0.0330861			39.3	-0.150893	0.542963	0.315986	-0.192604	-0.36464	-0.255538	0.263735			39.3	-0.202348	0.404101	0.205867	-0.186445	0.0776022	0.0872645	0.424912			39.3	-0.265477	0.190363	0.293182	0.0715217	-0.233175	0.279854	-0.286136
39.3333	-0.320725	0.0678087	-0.00993932	-0.256088	-0.363951	-0.0374086	-0.130788			39.3333	-0.244935	0.126777	0.268385	-0.222478	-0.155289	0.0671017	0.339267			39.3333	0.0727052	0.354282	0.21679	-0.19413	-0.0752638	-0.288683	0.0442976			39.3333	-0.299222	0.158946	0.143634	-0.0204337	-0.187306	0.0152081	-0.210152
39.3667	-0.716487	0.12778	-0.254204	-0.117288	-0.290344	-0.124368	0.0309256			39.3667	-0.13324	0.369746	0.437903	-0.159941	-0.00493253	0.157919	0.319275			39.3667	-0.307798	0.38275	0.0263778	-0.393708	-0.187277	0.0575095	0.222431			39.3667	-0.163662	0.0117507	0.124275	-0.21354	-0.158492	0.0208655	-0.33889
39.4	-0.631795	0.128711	-0.114408	-0.14534	-0.393198	-0.346597	-0.336299			39.4	-0.122438	0.326762	0.218043	-0.028097	-0.342712	-0.0284953	0.26094			39.4	-0.09896	0.364449	0.102685	-0.19874	-0.0597973	0.140055	0.181004			39.4	-0.331802	0.326505	0.125727	-0.00446255	-0.136145	-0.0614826	-0.274037
39.4333	-0.277102	-0.291042	-0.426248	-0.330534	-0.245154	0.30439	-0.140895			39.4333	-0.238413	0.343036	0.271564	-0.101388	-0.206974	-0.101388	0.14982			39.4333	-0.376198	0.183471	0.298873	0.00131252	-0.099518	-0.0869417	0.27762			39.4333	-0.332093	0.420174	0.30867	-0.101258	-0.142026	0.100699	-0.0426965
39.4667	-0.0408204	0.0680475	0.239599	-0.298423	-0.428958	0.0869915	-0.356514			39.4667	-0.296024	0.462468	0.118294	-0.0910317	-0.191834	0.00735357	0.34678			39.4667	0.159609	0.0299455	0.321354	-0.139886	-0.065606	0.315612	0.298098			39.4667	-0.293113	0.20549	0.255916	-0.112389	-0.317855	0.0950418	-0.0697992
39.5	-0.429787	-0.0994067	-0.0869582	-0.332431	-0.544267	-0.0543174	-0.0431932			39.5	-0.138714	0.786204	0.165613	-0.299752	0.00289858	0.137604	0.350616			39.5	-0.315579	0.0563804	0.361664	-0.0538245	-0.074341	-0.278116	0.23853			39.5	-0.394637	0.0821485	0.329481	-0.0572159	-0.212005	0.289283	-0.202892
39.5333	-0.233144	-0.44315	-0.384028	-0.272753	-0.486764	0.0109021	0.236437			39.5333	-0.0657289	0.302919	0.381613	-0.330024	-0.133362	0.0874161	0.377289			39.5333	-0.24735	0.38275	0.414633	-0.202434	-0.0456447	-0.108834	0.388308			39.5333	-0.154644	0.0437497	0.352711	-0.232415	-0.18025	0.227679	-0.200957
39.5667	-0.375121	-0.0267305	0.114243	-0.436757	-0.424857	-0.159393	-0.528335			39.5667	0.0667145	0.284874	0.392372	-0.122101	-0.0634044	-0.0679291	0.521931			39.5667	0.0254545	0.350215	0.510984	0.00838493	-0.141654	0.0300982	0.313286			39.5667	-0.151444	0.289269	0.0594223	-0.223703	-0.102626	0.0975562	-0.0247895
39.6	-0.434578	0.0185093	0.165306	-0.360097	-0.312925	-0.189587	-0.413787			39.6	-0.061997	0.280218	0.356827	-0.247572	-0.25396	-0.121702	0.32601			39.6	-0.110096	0.209906	0.326426	-0.121579	0.0472533	0.0615296	-0.0162651			39.6	-0.34402	0.0460769	-0.0572159	-0.211604	-0.235527	0.0623539	-0.344213
39.6333	-0.544859	0.215151	-0.516992	-0.595472	-0.619658	-0.126783	0.0915683			39.6333	0.0839787	0.408296	0.280727	-0.0141557	0.042576	-0.0129608	0.421792			39.6333	-0.283373	0.206856	0.17337	-0.0976949	0.103947	-0.108664	0.277532			39.6333	-0.230569	-0.00919411	0.0594223	0.0313517	-0.233175	0.137159	-0.156915
39.6667	-0.229784	-0.325557	0.0979807	-0.47439	-0.333347	0.265741	-0.215014			39.6667	0.0946051	0.453179	0.419274	0.0185065	-0.235688	-0.320066	0.27316			39.6667	-0.0322472	0.32683	0.427141	-0.0130594	-0.23564	-0.199407	0.2758			39.6667	-0.436526	0.0844757	0.210906	-0.109969	-0.236703	-0.0250231	-0.0204337
39.7	-0.576121	0.131526	-0.206532	-0.0159343	-0.461194	-0.178718	-0.380097			39.7	0.172288	0.316307	0.486183	-0.110549	-0.176694	-0.113338	0.62067			39.7	-0.00676346	0.398001	0.154215	0.0381295	0.0141265	-0.0913923	0.632614			39.7	-0.354783	0.213635	0.287375	-0.149171	-0.109095	0.0994421	-0.0765748
39.7333	-0.439277	-0.0827308	0.316533	-0.25503	-0.453227	-0.0893426	0.313925			39.7333	-0.0643546	0.402441	0.345273	-0.124491	-0.0446099	-0.104973	0.435903			39.7333	-0.0771268	-0.065627	0.230839	0.00223363	-0.0268727	-0.00522666	0.364785			39.7333	-0.173844	0.0932027	0.182352	-0.179178	-0.145554	0.0950418	-0.284684
39.7667	-0.275809	-0.300404	-0.00579208	-0.242343	-0.5995	-0.0506941	-0.00276479			39.7667	-0.169956	0.498993	0.247464	-0.295769	-0.0273815	-0.19101	0.201276			39.7667	-0.315356	0.237358	0.431273	-0.189409	-0.0176772	0.0479753	0.389531			39.7667	-0.316385	0.0425861	-0.00591446	-0.368896	-0.106155	0.0604681	-0.333082
39.8	-0.581305	-0.197409	0.213037	-0.410474	-0.548947	-0.346597	-0.0701455			39.8	-0.407782	0.761634	0.248303	-0.00897767	-0.173562	0.026473	0.0630719			39.8	-0.0076901	0.195672	0.243127	-0.051676	-0.0554506	-0.0616282	0.377423			39.8	-0.121482	0.0943663	0.164445	-0.0494722	-0.142614	-0.0564537	-0.0267253
39.8333	-0.500185	-0.320286	0.133823	-0.431944	-0.341664	-0.126783	-0.447478			39.8333	0.105434	0.434168	0.410565	-0.0679292	-0.0639266	-0.040445	0.28808			39.8333	-0.120182	0.230241	0.383404	0.14193	0.0751266	-0.00620878	0.161701			39.8333	-0.394055	0.504535	0.00715295	0.0492588	-0.28904	0.0843553	-0.308399
39.8667	-0.60661	-0.0492483	-0.434382	-0.296056	-0.37323	-0.330896	-0.167848			39.8667	0.0738887	0.384987	0.538069	-0.140424	-0.224202	-0.248368	0.484736			39.8667	-0.158396	0.177371	0.450806	-0.0276202	-0.275711	-0.237016	0.290474			39.8667	-0.258496	0.0228049	0.235105	-0.143364	-0.14673	0.0925273	-0.205312
39.9	-0.0846192	-0.138762	-0.242517	-0.194993	-0.5046	0.0145254	-0.413787			39.9	-0.178593	0.782398	0.110718	-0.106168	-0.0738459	0.0204981	-0.0760306			39.9	-0.364108	0.249559	0.520181	-0.0842017	-0.0744443	-0.187956	0.144411			39.9	-0.378346	0.237489	0.125243	0.0342556	-0.150259	0.183676	-0.140944
39.9333	0.150914	-0.413722	0.0761774	-0.33984	-0.506878	-0.0398242	0.0477708			39.9333	0.387037	0.734288	0.233688	-0.144008	0.0457084	-0.107363	0.269806			39.9333	0.0459748	0.38275	0.379711	-0.0035099	-0.0545375	-0.127676	0.262111			39.9333	-0.132827	0.189781	0.0618422	0.0197362	-0.136145	0.269796	-0.0194658
39.9667	-0.431668	-0.282888	-0.0870418	-0.395195	-0.0529012	-0.124368	-0.383466			39.9667	0.303043	0.361286	0.260815	0.0706865	-0.14537	-0.0177407	0.409619			39.9667	-0.283899	0.349198	0.143741	-0.206128	-0.044922	0.0546666	0.291973			39.9667	-0.211079	0.179891	0.275275	-0.143847	-0.300801	0.0164652	-0.136588
40	-0.464633	-0.176739	-0.312492	-0.282867	-0.70021	-0.322442	0.125259			40	-0.190645	0.375158	0.278797	-0.0830653	-0.187135	0.0288629	0.187651			40	-0.297793	0.358349	0.383134	-0.0610189	-0.175068	-0.260466	0.381195			40	-0.328893	0.0926209	-0.10029	-0.151107	-0.164372	-0.00679338	-0.0727031
40.0333	-0.617205	-0.113668	0.00562292	-0.409287	-0.551053	-0.0470708	0.0140804			40.0333	-0.0610959	0.444253	0.129513	-0.149585	-0.0409554	-0.0105709	0.243079			40.0333	-0.206242	0.0401127	0.355924	-0.0919047	-0.0164155	0.308194	0.725772			40.0333	-0.237842	0.0321136	0.00715295	-0.185953	-0.123796	0.235222	-0.250806
40.0667	-0.206499	-0.0325722	-0.0809426	-0.54074	-0.217183	0.00969434	-0.602453			40.0667	0.0455934	0.453521	0.10031	-0.0878451	-0.1177	-0.00937593	0.071682			40.0667	-0.142317	0.327847	0.4225	0.123883	-0.037795	0.0324306	0.203362			40.0667	-0.312312	0.162437	0.135406	-0.0281773	-0.259637	-0.038224	-0.0214017
40.1	0.0659083	-0.0273725	0.0420065	-0.352015	-0.449181	-0.0712261	0.067985			40.1	0.0368748	0.52937	0.344367	-0.138432	-0.0999495	0.0539571	0.162417			40.1	-0.0630139	0.347165	0.369426	0.0946192	0.0099832	0.386273	0.546806			40.1	-0.170353	0.210145	0.313993	-0.149655	0.00557607	0.13213	-0.132716
40.1333	-0.15539	-0.198598	-0.352828	-0.403653	-0.486935	-0.061564	0.118521			40.1333	-0.0194735	0.764799	0.338642	-0.260716	-0.198099	0.209302	0.403792			40.1333	-0.0213828	0.474256	0.193389	0.0985008	-0.0451006	0.104081	0.2352			40.1333	-0.262859	0.4673	0.319317	-0.270649	-0.313738	0.311913	-0.0843185
40.1667	-0.641748	-0.19689	0.130555	0.0736371	-0.425025	-0.119537	-0.541811			40.1667	0.00436996	0.520007	0.130661	-0.242394	0.121409	0.12924	0.421319			40.1667	-0.0855187	0.212956	0.412123	-0.0121183	-0.156315	0.116512	0.318436			40.1667	-0.303003	0.346868	0.0303837	-0.0828666	-0.346081	0.246537	-0.158851
40.2	-0.477379	-0.241838	-0.0364955	-0.630435	-0.456888	-0.61593	-0.215014			40.2	-0.343071	0.341772	0.0545056	-0.0711156	-0.123443	-0.21252	0.261255			40.2	-0.0505002	0.310562	0.131553	-0.173352	-0.0489375	0.183543	0.281561			40.2	-0.12759	0.228762	0.400625	-0.246934	-0.202008	0.511811	-0.247902
40.2333	-0.324278	-0.382456	-0.181039	-0.277648	-0.0900725	-0.190795	-0.312716			40.2333	0.0965588	0.566331	0.393635	-0.0778872	-0.310344	0.0479823	0.0740659			40.2333	-0.25631	0.338014	0.285176	0.0180246	-0.126504	0.223194	0.906815			40.2333	-0.255296	0.289269	0.518715	0.0928166	0.0543847	0.412491	0.113628
40.2667	-0.0704796	-0.345566	-0.144039	-0.279658	-0.404631	-0.0579407	-0.582239			40.2667	0.0231364	0.384264	0.0847222	-0.181849	-0.131274	0.246346	0.296099			40.2667	-0.163387	0.175338	0.182497	-0.00818763	-0.0436733	-0.188585	0.446475			40.2667	-0.271586	0.0990206	-0.0581838	-0.180146	-0.114975	0.1183	-0.203376
40.3	-0.38723	-0.0995331	-0.137248	-0.487107	-0.754791	-0.357467	-0.110574			40.3	-0.190961	0.450044	0.438065	-0.110151	-0.0707135	-0.37145	0.27267			40.3	-0.362577	0.219057	0.32884	0.0549	-0.291672	0.247424	0.353159			40.3	-0.211952	0.267743	0.299474	-0.122069	-0.00971337	0.122072	-0.0606037
40.3333	-0.0640275	-0.0955141	-0.28277	-0.157741	-0.459657	-0.152147	-0.245336			40.3333	-0.0896931	0.489189	0.290526	-0.0735056	-0.137539	-0.159941	0.151715			40.3333	-0.117604	0.11535	0.285303	-0.0425092	-0.0804461	0.107221	0.0748676			40.3333	-0.16628	0.446937	0.425308	-0.314691	-0.139086	0.132758	-0.0320491
40.3667	-0.81502	-0.478367	-0.368389	-0.736923	-0.399636	-0.192003	-0.22849			40.3667	0.238164	0.659062	0.252801	-0.231639	-0.174084	-0.0595643	0.119142			40.3667	-0.111014	0.101116	0.588092	-0.0304424	-0.172508	0.136527	0.524211			40.3667	-0.245987	0.179309	-0.0170458	-0.0431805	-0.230234	0.37666	-0.0151099
40.4	-0.553176	0.0927348	-0.0768817	-0.280218	-0.492531	-0.108667	-0.26555			40.4	-0.363798	0.795068	0.386017	-0.204553	-0.142759	0.123265	-0.0784804			40.4	-0.144837	0.0634975	0.216362	0.167858	-0.195515	0.299872	0.285021			40.4	-0.326857	-0.0202484	0.181868	-0.112389	-0.327264	0.407462	-0.248386
40.4333	-0.792079	0.0702961	0.15131	-0.312058	-0.185838	-0.164224	-0.268919			40.4333	-0.139458	0.426761	0.32898	-0.187425	-0.0164181	-0.104973	0.329952			40.4333	-0.0229649	0.0411295	0.552514	0.0724135	-0.0698441	0.229826	0.288112			40.4333	-0.17268	0.135674	0.0357075	-0.151107	-0.154963	0.130244	-0.201925
40.4667	-0.470081	-0.333815	-0.238702	-0.513234	-0.359089	-0.161809	-0.0869907			40.4667	-0.197358	0.360368	0.597257	-0.161136	-0.230989	-0.114533	0.260126			40.4667	-0.204408	0.140769	0.228785	-0.383535	-0.125144	0.181332	0.420855			40.4667	-0.23086	0.316032	0.255432	-0.12594	-0.209064	0.0491531	0.0173164
40.5	-0.846619	-0.0220669	-0.185487	-0.332146	-0.534077	-0.239106	0.0511399			40.5	-0.189844	0.604544	0.268737	-0.149983	-0.052441	0.13163	0.205784			40.5	-0.127895	0.542376	0.191666	0.117492	-0.229849	-0.0707621	0.262166			40.5	-0.155808	0.0740033	0.0298997	-0.151591	-0.106743	-0.0231373	-0.249838
40.5333	-0.684513	0.29523	-0.0567965	-0.396115	-0.255785	-0.257222	-0.484537			40.5333	-0.134048	0.442884	0.207795	-0.202562	0.0290022	0.0599319	0.265527			40.5333	-0.192434	0.187538	0.27618	-0.224488	0.0859146	-0.199171	0.228325			40.5333	-0.317548	0.265416	0.211391	-0.168046	-0.244936	-0.0885129	-0.274037
40.5667	-0.686582	0.142617	-0.117571	-0.391727	-0.144199	0.101485	-0.302609			40.5667	0.0675071	0.288259	0.131532	-0.114533	-0.194444	-0.19101	-0.0028875			40.5667	-0.0582685	0.0868823	0.441335	-0.148719	-0.188874	0.030428	0.210445			40.5667	-0.347511	0.248543	0.109272	-0.128844	-0.314915	0.0334378	-0.0315652
40.6	-0.656493	-0.162444	0.138744	-0.265771	-0.41328	-0.44805	0.354353			40.6	-0.0352552	0.542604	0.441046	-0.0922267	-0.129708	-0.262708	0.375951			40.6	-0.106537	0.327847	0.478735	0.121545	-0.125367	0.0436839	0.337436			40.6	-0.25355	0.360249	0.232685	-0.13562	-0.300801	0.0900128	-0.212088
40.6333	-0.0523602	-0.0665532	-0.0277025	-0.203176	-0.404536	0.0990692	-0.0162409			40.6333	-0.196066	0.261562	0.191108	-0.127677	-0.0336464	-0.0822686	0.166585			40.6333	-0.259873	0.132635	0.213522	-0.105855	0.0107283	0.0272764	0.0204231			40.6333	-0.315221	-0.067956	0.0192523	-0.074155	-0.147907	0.134644	-0.2963
40.6667	-0.548434	0.232349	-0.131149	-0.285538	-0.491826	-0.435972	-0.582239			40.6667	0.127384	0.390441	0.239112	-0.069124	-0.0915963	-0.18623	0.384215			40.6667	-0.188527	0.200756	0.320214	-0.148612	-0.20719	-0.0792931	0.158342			40.6667	-0.394055	-0.0697014	0.0671659	-0.074155	-0.206712	0.152874	-0.175306
40.7	0.080673	-0.0212358	0.191158	-0.358899	-0.582307	-0.19925	-0.0297171			40.7	0.126334	0.358769	0.314111	0.00416699	-0.179826	-0.108558	0.204025			40.7	-0.439779	0.099083	0.352134	0.0321158	-0.283562	-0.124743	0.271797			40.7	-0.196825	0.00535086	0.155733	-0.24403	-0.180838	0.0761834	-0.135136
40.7333	-0.363097	-0.304654	-0.507341	-0.324241	-0.49849	-0.061564	-0.154371			40.7333	0.130042	0.481991	0.49163	-0.119711	-0.219504	-0.112143	0.373125			40.7333	-0.236094	0.128568	0.191899	0.09914	0.0187301	-0.0457229	0.189361			40.7333	-0.240169	0.302069	0.272371	-0.0664113	-0.146142	0.0981848	-0.21112
40.7667	-0.574026	-0.199553	-0.192455	-0.507412	-0.395452	-0.386454	-0.437371			40.7667	-0.214524	0.269161	0.481994	-0.23602	-0.19079	-0.115728	0.497662			40.7667	-0.0546809	0.287178	0.341925	-0.0308037	-0.0379075	-0.0437801	0.359182			40.7667	-0.31813	0.165928	0.084105	-0.110453	-0.343729	-0.0885129	0.0144125
40.8	-0.244468	-0.0217315	0.219813	0.077435	-0.613596	-0.251184	-0.0735146			40.8	0.0634738	0.464487	0.273761	-0.109753	-0.131274	0.234397	0.369255			40.8	-0.2046	0.291245	0.414282	0.258078	-0.165407	-0.00320205	0.275196			40.8	-0.328021	0.0070962	0.17848	-0.219348	-0.180838	0.161675	-0.335018
40.8333	-0.228573	-0.210491	-0.009533	-0.420047	-0.0398085	-0.315195	-0.218383			40.8333	-0.187879	0.331269	0.47307	-0.0559795	-0.178782	-0.279438	0.0783661			40.8333	-0.197037	0.290228	0.378777	0.0560171	-0.176366	0.106806	0.305431			40.8333	-0.343729	0.176982	0.226394	-0.0436646	-0.124384	0.088127	-0.09303
40.8667	-0.539953	0.0149444	-0.0994285	-0.328719	-0.260045	0.134095	-0.00950284			40.8667	0.0757055	0.324801	0.415256	-0.293379	-0.277454	-0.244784	0.334824			40.8667	-0.0751691	-0.0137739	0.358652	0.0230578	-0.0414568	-0.179256	0.488121			40.8667	-0.273622	0.062949	0.0574863	-0.198537	-0.0120656	0.280482	-0.103193
40.9	-0.580438	0.223652	-0.0396338	-0.0623452	-0.446163	-0.0241232	0.206116			40.9	-0.0818805	0.114379	0.307993	-0.155958	-0.120832	-0.204155	0.229481			40.9	-0.159346	0.322763	0.173125	-0.167864	-0.0466032	-0.337938	-0.00285839			40.9	-0.260823	-0.0016308	-0.0335011	-0.197569	-0.168489	0.212592	-0.236287
40.9333	-0.538358	-0.254903	0.111378	-0.230121	-0.314053	-0.0965893	-0.305978			40.9333	0.23782	0.467079	0.242144	-0.192205	-0.177216	-0.21252	0.276257			40.9333	-0.285801	0.261759	0.540879	-0.2261	-0.0742843	0.0585278	-0.0401465			40.9333	-0.407145	0.0687671	0.0628101	-0.36454	-0.266694	-0.0822268	-0.0969018
40.9667	-0.426825	0.0565431	0.220395	-0.330278	-0.0304221	0.115978	-0.0128719			40.9667	0.0733457	0.665246	0.450251	-0.165518	-0.267534	0.0706866	0.221141			40.9667	-0.29504	0.383767	0.182502	0.249558	-0.00583152	0.199802	0.360066			40.9667	-0.381546	0.150801	0.0661979	-0.189341	0.129068	0.155388	-0.13804
41	-0.332597	0.198971	0.305707	-0.349816	-0.544104	-0.213743	-0.177955			41	0.0216842	0.126915	0.260139	-0.132457	-0.177216	0.0443974	0.0295242			41	-0.0697376	0.266843	0.290559	-0.0613761	-0.439638	0.198705	0.499078			41	-0.192752	0.283451	0.0763614	-0.137072	-0.189659	0.237108	-0.174338
41.0333	-0.483175	-0.0312822	-0.218558	-0.301138	-0.282377	-0.253599	-0.026348			41.0333	-0.156686	0.601425	0.223213	-0.116923	-0.0179843	-0.0273003	0.223514			41.0333	-0.42355	0.125518	0.128552	-0.195117	-0.205806	0.116134	0.2071			41.0333	-0.166571	0.160691	0.170737	-0.0572159	-0.235527	-0.0394811	-0.240643
41.0667	-0.334691	-0.186626	-0.15559	-0.248493	-0.302403	-0.356259	-0.272288			41.0667	0.227667	0.317537	0.184395	-0.138034	-0.23621	0.0814412	0.333608			41.0667	-0.287099	0.105183	0.314588	-0.21963	-0.276984	-0.481337	0.166145			41.0667	-0.302422	-0.0947188	0.118467	0.044419	-0.0961576	0.0793264	-0.0407606
41.1	0.0392091	-0.195057	-0.445211	-0.145284	-0.49725	-0.193211	-0.0903598			41.1	-0.0775033	0.715955	0.174031	-0.20774	-0.206974	-0.272268	0.0326471			41.1	-0.254118	0.0319789	0.131702	0.0843832	-0.155731	-0.142199	0.297854			41.1	-0.273622	0.168255	0.0957204	-0.265809	-0.14085	0.388603	-0.109969
41.1333	-0.604903	-0.34706	-0.391166	-0.222267	-0.41615	-0.141277	-0.0431932			41.1333	0.103685	0.75708	-0.132964	-0.18623	-0.136494	0.0348378	0.015187			41.1333	-0.268549	0.15907	0.000653277	-0.135328	0.00541258	-0.400237	0.186236			41.1333	-0.19537	0.364903	0.169769	-0.233383	-0.0755757	0.112014	-0.183049
41.1667	-0.525348	-0.0741361	-0.0950039	-0.170673	-0.377601	-0.102628	-0.184693			41.1667	0.38671	0.228047	0.424185	-0.0902351	-0.241431	0.00376873	0.365639			41.1667	-0.263674	0.420369	0.126374	0.0238615	-0.243157	0.0577458	0.172246			41.1667	-0.322203	0.0582947	0.0812011	-0.0988377	0.00204774	0.0359522	-0.116261
41.2	-0.525534	-0.0665038	0.268707	-0.420986	-0.227906	-0.148523	-0.44074			41.2	-0.253377	0.194181	0.324926	-0.133652	-0.334359	-0.106168	0.221639			41.2	-0.331883	0.148903	0.390777	-0.0448691	-0.0470712	0.0974171	-0.03314			41.2	-0.228824	0.0431678	0.0676498	-0.213056	-0.279043	0.0698973	0.0236081
41.2333	0.254789	-0.472107	-0.298556	-0.27771	-0.320108	-0.102628	-0.241967			41.2333	-0.189925	0.762926	0.0966036	-0.221681	-0.0487864	-0.0822686	0.313123			41.2333	-0.116648	0.303445	0.401388	-0.0559604	0.0100015	0.0290631	0.0701509			41.2333	-0.150572	0.144401	0.173156	-0.17821	-0.34667	0.106357	-0.226607
41.2667	-0.401791	-0.176309	0.136626	-0.578887	-0.399219	-0.0374086	-0.0735146			41.2667	-0.0446078	0.66179	0.313504	-0.347949	0.00968547	0.319239	0.170397			41.2667	-0.230703	0.373599	0.455179	-0.332048	-0.0768471	0.149991	0.201657			41.2667	-0.212533	0.0664399	0.223974	-0.115777	-0.145554	0.426949	-0.163206
41.3	-0.0647591	-0.0850197	0.0041633	-0.178029	-0.657278	-0.0833038	-0.26555			41.3	0.179702	0.543188	0.356628	-0.0496063	-0.111435	0.0467873	0.12442			41.3	-0.234521	0.182455	0.28401	0.0149058	-0.170967	-0.0164287	-0.0472553			41.3	-0.194788	0.146147	0.15041	-0.193213	-0.218473	0.186191	-0.0489882
41.3333	-0.432469	-0.0306756	0.0375045	-0.2541	-0.28437	-0.153354	-0.380097			41.3333	-0.184102	0.606991	0.209096	-0.0583694	-0.214283	-0.0655391	0.0161818			41.3333	-0.367621	0.0573972	0.364883	-0.169627	-0.0521713	0.51644	0.194404			41.3333	-0.360311	0.0844757	0.277695	-0.169982	-0.177897	-0.218636	-0.0383408
41.3667	-0.802997	-0.217774	0.012946	-0.309968	-0.090336	-0.457712	-0.107205			41.3667	-0.030936	0.662805	0.2544	-0.278641	-0.0733238	0.214082	0.187725			41.3667	0.00237037	0.393934	0.452625	-0.40441	-0.0377011	0.535748	0.313062			41.3667	-0.207297	0.210726	0.245753	-0.0615716	-0.153199	0.0604681	-0.303075
41.4	-0.288853	-0.376219	-0.212587	-0.579633	-0.439031	-0.29104	-0.164479			41.4	0.0322227	0.506489	0.218562	-0.117321	-0.156333	0.261881	-0.087711			41.4	-0.0386772	0.114334	0.273248	0.094275	-0.227272	0.109714	0.46704			41.4	-0.297476	0.210726	0.231717	-0.337922	-0.0720474	0.147845	0.00376512
41.4333	-0.390365	-0.238585	0.014854	-0.395268	-0.632581	-0.014461	-0.164479			41.4333	0.108506	0.448166	0.235856	-0.122897	-0.259181	0.155529	0.0853721			41.4333	-0.292943	0.130602	0.345122	0.0886872	-0.142866	0.00692739	0.128325			41.4333	-0.283222	-0.0202484	0.148474	-0.169498	-0.399595	0.187448	-0.177726
41.4667	-0.58378	-0.220207	0.317566	-0.306025	-0.50866	-0.214951	0.128628			41.4667	0.121011	0.736776	0.26124	-0.253547	-0.164686	0.111315	0.350621			41.4667	-0.208765	0.0950161	0.357073	-0.143699	-0.226571	0.0464939	0.344353			41.4667	-0.366129	0.117056	-0.0485043	-0.20628	-0.246112	-0.0520534	-0.176758
41.5	0.00845077	-0.014773	-0.300044	-0.386441	-0.695816	-0.271716	-0.423895			41.5	0.272514	0.603012	0.181609	-0.0125625	-0.0707135	0.0981707	0.301032			41.5	-0.261543	0.247525	0.257853	-0.0983692	-0.100166	0.181839	0.475461			41.5	-0.276822	0.20549	0.241397	-0.284684	-0.0832204	0.327628	-0.400838
41.5333	-0.653776	-0.222348	-0.3033	-0.419272	-0.534871	-0.194418	0.280234			41.5333	0.151001	0.306531	0.24163	-0.0185373	-0.0571396	0.0718816	0.483334			41.5333	-0.245614	0.167204	0.484908	0.0744931	-0.0635549	0.00100932	0.576551			41.5333	-0.207006	0.0868029	-0.00639836	-0.0988377	-0.136145	0.174875	-0.0606037
41.5667	-0.635592	0.00181167	-0.160513	-0.632175	-0.439595	-0.253599	0.0949373			41.5667	0.00264739	0.742859	-0.00825757	-0.187425	-0.16312	0.300119	0.455442			41.5667	-0.270425	0.0553637	0.190607	0.152082	-0.199742	-0.0615937	0.307094			41.5667	-0.247732	0.16651	0.0695857	-0.0257574	-0.18319	-0.0671401	-0.0828666
41.6	-0.222604	-0.256715	0.137102	-0.444164	-0.597182	-0.571242	0.0983063			41.6	-0.0678783	0.659628	0.230502	-0.182645	-0.158421	0.0133284	0.910354			41.6	-0.488752	0.193639	0.239514	-0.117007	-0.0993625	-0.0145454	0.353787			41.6	-0.343147	0.265416	0.0463549	-0.264357	-0.251404	0.167332	-0.239191
41.6333	-0.314656	0.1818	0.0823812	-0.123925	-0.221578	-0.148523	-0.356514			41.6333	-0.0209332	0.541382	0.239818	0.0328461	-0.216893	0.00257375	1.11399			41.6333	-0.189665	0.292261	0.299799	-0.00640631	-0.134356	0.013757	0.33398			41.6333	-0.234642	0.11182	0.131051	-0.0998057	-0.179662	-0.0878842	-0.200473
41.6667	-0.488258	-0.273763	-0.210392	-0.362222	-0.483337	-0.142484	-0.026348			41.6667	0.00410032	0.348695	0.328095	-0.0269021	0.0342228	-0.110948	0.691391			41.6667	-0.28077	0.304462	0.185089	-0.187361	-0.263933	-0.365696	0.201765			41.6667	-0.186934	-0.0243209	0.127179	-0.0964179	-0.214945	-0.0168512	-0.384867
41.7	0.149864	0.215818	-0.156571	-0.366792	-0.412743	-0.282586	-0.174586			41.7	-0.186604	0.507807	0.0756208	-0.0754972	-0.228901	0.104146	0.864089			41.7	-0.0905786	0.107217	0.366153	-0.238409	-0.225373	-0.216607	0.128779			41.7	-0.441181	-0.213988	0.248173	-0.179178	-0.155551	0.375403	-0.214508
41.7333	-0.840926	-0.55525	-0.0758363	-0.217423	-0.443802	0.00365552	-0.521597			41.7333	0.224242	0.252016	0.275534	0.0280663	-0.114568	0.0623219	1.21557			41.7333	-0.301742	0.197706	0.303846	-0.211431	-0.113707	-0.171647	0.205451			41.7333	-0.4182	0.0699307	-0.0436646	-0.245966	-0.290216	-0.0514248	-0.110453
41.7667	-0.695269	0.184031	0.1961	-0.347932	-0.425924	-0.23669	-0.0566694			41.7667	0.175825	0.355712	0.316818	-0.229249	-0.126575	-0.0571745	0.906235			41.7667	-0.160979	0.258709	0.425127	-0.0684229	-0.23801	0.0547963	0.269718			41.7667	-0.362638	-0.0260664	-0.0664113	-0.241611	-0.218473	0.0868698	-0.111905
41.8	-0.727364	-0.022342	-0.0287479	-0.547183	-0.513771	-0.353844	0.142104			41.8	0.129856	0.300671	0.510644	0.151944	-0.35472	0.135215	1.14985			41.8	-0.176894	0.117384	0.0340222	-0.0166767	-0.0025333	-0.00188157	0.35126			41.8	-0.307658	0.022223	0.232685	-0.232899	-0.311974	0.196248	-0.0465684
41.8333	-0.644409	-0.298815	-0.440092	-0.187043	-0.413083	-0.349013	-0.161109			41.8333	-0.311165	0.466997	0.308655	0.0388209	-0.120832	0.0432024	0.51353			41.8333	-0.176111	0.175338	0.324926	-0.177953	-0.360179	0.359673	0.159856			41.8333	-0.25035	-0.188389	0.392397	-0.257098	-0.29198	-0.0451387	-0.221283
41.8667	-0.604377	0.141958	0.0615281	-0.313091	-0.618231	-0.233067	-0.167848			41.8667	-0.0406535	0.632887	0.183314	-0.061556	-0.322352	0.0133284	0.398881			41.8667	-0.202967	0.325813	0.221795	-0.153338	-0.174493	0.270201	0.415245			41.8667	-0.297476	0.0513131	0.0763614	-0.196117	-0.230234	0.0636112	-0.169014
41.9	-0.1251	-0.225653	0.00961004	-0.0427861	-0.293821	-0.257222	-0.434002			41.9	-0.11903	0.374017	0.130768	-0.226461	-0.139627	0.12685	0.646423			41.9	-0.232527	0.108233	0.300588	-0.161113	-0.179698	0.338753	0.679415			41.9	-0.150281	-0.103446	-0.0862544	-0.206764	-0.214357	0.0114364	-0.259034
41.9333	-0.603769	-0.0984464	-0.519362	-0.280826	-0.493575	-0.230652	-0.117312			41.9333	-0.270068	0.5263	0.359444	-0.00618936	-0.283718	-0.0488097	0.286601			41.9333	-0.518784	0.516958	0.476991	-0.240582	-0.296701	-0.231272	0.23674			41.9333	-0.276822	-0.08541	0.0148965	-0.25129	-0.303741	-0.0162225	-0.0175298
41.9667	-0.39685	-0.168591	-0.081909	-0.627839	-0.645749	-0.351428	-0.100467			41.9667	0.0507786	0.530254	0.353687	-0.176272	-0.238298	-0.274658	0.557775			41.9667	-0.271218	-0.157133	0.228662	-0.0759003	-0.345474	-0.02375	0.521788			41.9667	-0.380383	0.0117507	0.0957204	-0.112873	-0.0996859	-0.00867923	-0.271133
42	-0.727831	0.0748404	-0.087526	-0.176567	-0.535808	-0.179925	-0.0533004			42	-0.166498	0.210323	0.244792	-0.164323	-0.147458	0.376597	0.577521			42	-0.230911	0.129585	0.45541	0.00205401	-0.00981341	0.179412	0.237569			42	-0.339075	-0.0161758	0.14073	-0.262905	-0.18025	-0.00742197	-0.101742
42.0333	-0.017965	-0.330064	0.415503	-0.213968	-0.0701983	-0.172679	-0.215014			42.0333	0.241977	0.401197	0.147892	-0.263106	-0.286851	-0.0308852	0.243376			42.0333	-0.328793	0.219057	0.32809	-0.300787	-0.229358	-0.000889053	0.383983			42.0333	-0.191298	0.362576	0.159605	0.000861195	-0.297861	-0.0225086	-0.21354
42.0667	-0.805231	0.293105	0.128206	-0.164201	-0.253445	-0.223405	-0.0566694			42.0667	-0.138572	0.102962	0.360171	-0.247173	-0.320263	-0.346355	0.709809			42.0667	-0.257341	0.0431629	0.220459	-0.0646515	-0.0930361	-0.245702	0.410928			42.0667	-0.261695	0.048404	0.0715217	-0.417778	-0.138498	0.152245	-0.241611
42.1	0.0183803	0.105093	-0.176387	-0.0654689	-0.601514	-0.340558	0.071354			42.1	-0.201287	0.440744	0.391704	-0.204155	-0.0242491	-0.0213255	0.298216			42.1	-0.30186	0.246508	0.310997	-0.176298	-0.278615	0.100054	0.0245371			42.1	-0.264605	0.164182	-0.00785037	-0.0833505	-0.207888	0.0497817	-0.20628
42.1333	-0.515993	-0.340178	-0.194578	-0.476937	-0.48977	0.021772	0.26002			42.1333	-0.175455	0.228192	0.203396	-0.150382	-0.0863756	0.000183796	0.0482166			42.1333	-0.315256	0.236341	0.280322	-0.239351	-0.0766498	-0.11276	0.0769194			42.1333	-0.351002	0.125783	-0.00349454	-0.0809306	-0.150847	-0.0621112	-0.0639915
42.1667	-0.387325	-0.0420123	-0.294044	-0.34949	-0.474859	-0.159393	0.0983063			42.1667	-0.0529286	0.52638	0.253908	-0.259522	-0.368816	0.143579	0.0921069			42.1667	-0.153987	0.0950161	0.0346766	-0.183116	-0.26315	0.0976158	0.395606			42.1667	-0.364965	0.180473	0.170737	-0.0944819	-0.104979	0.15476	-0.282748
42.2	-0.343554	0.0809534	-0.136348	-0.0159885	-0.397856	-0.212535	0.0915683			42.2	-0.313188	0.401163	0.0720849	-0.259522	-0.173562	0.0981707	0.148469			42.2	-0.436668	0.136702	0.2474	-0.263489	-0.202548	-0.127655	0.185347			42.2	-0.297767	0.128693	0.0734576	-0.0877063	-0.290804	0.054182	-0.147235
42.2333	-0.0891419	0.0173249	-0.0493565	-0.382078	-0.122425	-0.106251	-0.00276479			42.2333	-0.0602657	0.438422	0.185534	-0.230842	-0.187657	0.105341	0.127476			42.2333	-0.124187	0.0594306	0.359203	-0.214724	-0.150103	-0.0976601	0.404707			42.2333	-0.383001	0.0513131	0.191064	-0.106581	-0.164372	0.0988134	0.026028
42.2667	-3.94359e-05	-0.0968293	-0.347986	-0.202067	-0.558044	0.305598	0.118521			42.2667	0.0247075	0.461874	0.00690454	-0.128474	-0.1177	-0.0846586	-0.0613803			42.2667	-0.062499	0.402068	0.211578	-0.193506	0.135518	-0.14628	0.337992			42.2667	-0.097046	0.286942	0.170737	-0.230479	-0.311386	0.118929	-0.165142
42.3	0.515098	0.442019	0.0815489	-0.210136	-0.627649	-0.225821	0.131997			42.3	-0.0273356	0.205545	0.242146	-0.10099	-0.037823	-0.127677	0.155568			42.3	-0.348457	-0.0229244	0.291596	-0.000406557	-0.219855	0.10212	0.312637			42.3	-0.0889008	-0.0685378	0.25398	-0.126908	-0.175545	0.332028	-0.121585
42.3333	-0.296456	0.0529909	-0.121773	-0.236148	-0.327794	-0.0349931	-0.16111			42.3333	-0.181351	0.22713	0.152961	-0.129669	-0.235166	0.340748	0.334096			42.3333	-0.426706	0.216007	0.247303	-0.109513	-0.15147	0.190042	-0.0591979			42.3333	-0.143008	-0.0749376	0.290279	-0.104161	-0.0514654	0.0962989	-0.136588
42.3667	-0.254276	0.133013	-0.181991	-0.379735	-0.2934	-0.0567329	0.0545089			42.3667	0.110905	0.513876	0.254335	-0.0543862	-0.40014	0.0814413	0.151			42.3667	-0.0970013	0.331914	0.22803	-0.157546	-0.135797	-0.255756	0.240681			42.3667	-0.218351	-0.00977596	0.249141	-0.224671	-0.130265	0.223907	-0.180146
42.4	-0.244366	0.30435	-0.507048	-0.355776	-0.330195	-0.293455	0.458794			42.4	-0.145845	0.218349	0.220546	-0.0982015	-0.146936	0.00376873	0.146623			42.4	-0.125709	0.072648	0.436985	0.179136	-0.0319904	0.18503	0.434241			42.4	-0.0641743	0.249707	0.465478	-0.193697	-0.202008	0.269167	-0.351473
42.4333	0.424446	-0.0175897	0.0152454	-0.419808	-0.586672	0.0229798	0.361091			42.4333	-0.326064	0.234474	0.26413	-0.00220616	-0.0649707	0.149554	0.14964			42.4333	-0.183329	0.0919659	0.302397	-0.215899	0.11208	0.145726	0.622768			42.4333	-0.22446	0.306723	0.339644	-0.205312	-0.27081	0.180533	-0.147719
42.4667	-0.21172	-0.203706	-0.192419	-0.236442	-0.31626	-0.0990048	-0.29924			42.4667	-0.0246236	0.409481	0.409306	0.0782546	-0.219504	0.000183796	0.170129			42.4667	-0.0298151	0.3797	0.607553	0.045091	0.0259047	-0.125958	0.273302			42.4667	-0.164826	-0.0539927	0.198323	-0.172402	-0.223766	0.222021	-0.305979
42.5	-0.0555091	0.548704	0.286839	-0.0768903	-0.266043	0.0253953	0.00734235			42.5	-0.422939	0.496494	0.396888	-0.15078	-0.0482644	0.248736	0.403153			42.5	0.0635277	0.389867	0.332642	0.0288201	-0.196717	0.013506	0.483921			42.5	-0.35682	0.153128	0.0671658	-0.0862544	0.0526206	0.152245	-0.258066
42.5333	-0.260332	-0.0886945	-0.181476	-0.254645	-0.231216	0.053174	-0.0970979			42.5333	0.00465171	0.389256	0.374296	-0.222079	-0.0654928	-0.0523945	0.402046			42.5333	-0.231433	0.201772	0.403573	-0.0208489	-0.150671	0.238849	0.507973			42.5333	-0.152026	0.4673	0.222522	-0.0649594	-0.117916	0.111386	-0.0320491
42.5667	-0.507576	-0.359371	0.0474203	-0.559692	-0.487637	-0.194418	0.209485			42.5667	-0.0182758	0.46358	0.530877	-0.0324786	-0.0446099	0.0647118	0.183429			42.5667	0.0565592	0.732505	0.216439	0.284276	0.0410762	0.162961	0.184702			42.5667	-0.219224	0.30556	0.163961	-0.159819	-0.0185343	0.249052	-0.0978698
42.6	-0.232441	-0.224277	-0.344948	-0.262648	-0.62067	-0.114706	0.307187			42.6	-0.135677	0.411494	0.361392	-0.296565	-0.045132	-0.00340104	0.341787			42.6	0.164443	0.22414	0.389737	-0.050623	-0.158073	0.176541	0.270349			42.6	-0.367001	0.172909	0.153798	-0.0693152	-0.241407	0.000749999	-0.101258
42.6333	-0.792888	-0.284927	-0.0550209	-0.270976	-0.662503	-0.0567329	0.148842			42.6333	-0.0995798	0.484978	0.602239	-0.060361	-0.304601	-0.173086	0.280022			42.6333	-0.26004	-0.0269913	0.265362	-0.205137	-0.1447	0.351967	0.126558			42.6333	-0.1017	0.11822	0.0279638	0.0986243	-0.277279	0.205677	-0.231931
42.6667	-0.694824	-0.0792968	0.153597	-0.230522	-0.32465	-0.127991	-0.332931			42.6667	0.40475	0.504379	0.283938	-0.0432332	-0.183481	-0.110948	0.541393			42.6667	0.305259	0.401051	0.411014	-0.2217	-0.180707	0.0811782	0.905447			42.6667	-0.221842	0.200836	0.0419991	-0.111421	-0.210829	0.238365	-0.192245
42.7	-0.395684	-0.199083	-0.394953	-0.352608	-0.189995	-0.362298	0.229699			42.7	-0.0489754	0.277895	0.385041	-0.0492081	-0.192356	-0.0500046	0.246295			42.7	-0.0772957	0.289211	0.129471	-0.0523989	-0.122351	0.0811894	0.39258			42.7	-0.368747	0.151965	0.0870089	-0.155947	-0.18025	0.0673828	-0.164174
42.7333	-0.327648	-0.00704157	-0.0387406	-0.313448	-0.338537	0.0990692	0.0477708			42.7333	0.0223939	0.539654	0.554561	0.0810429	0.249316	0.00854854	0.329292			42.7333	-0.189163	0.167204	0.207771	0.0464542	-0.195959	-0.178272	0.024517			42.7333	-0.167153	0.0705124	0.0410312	-0.278393	-0.126148	0.00640743	-0.0697992
42.7667	-0.419284	-0.181579	-0.0300442	-0.28956	-0.607947	-0.141277	0.0241875			42.7667	0.0158076	0.430331	0.565299	-0.131262	-0.0701914	-0.040445	0.361143			42.7667	-0.0365259	0.133652	0.302843	-0.0175872	0.0128232	0.293293	0.273678			42.7667	-0.278568	0.148474	0.130567	-0.235803	-0.162608	-0.118686	-0.0746389
42.8	-0.530346	-0.190029	0.103169	-0.382719	-0.160599	-0.0398242	-0.215014			42.8	0.256664	0.221487	0.268376	-0.0607593	0.043098	0.025278	0.339129			42.8	-0.0551545	0.0370626	0.449319	0.160658	0.197411	0.0750902	0.404726			42.8	-0.111591	0.0972753	0.0937845	-0.103677	-0.287276	0.130873	-0.363088
42.8333	-0.546671	0.182797	0.169477	-0.316593	-0.424137	-0.126783	-0.336299			42.8333	-0.0346187	0.707626	0.332395	0.211692	-0.173039	0.203327	0.680318			42.8333	-0.0416118	0.234308	0.341887	-0.104914	-0.159986	0.202391	0.0790916			42.8333	-0.338784	0.197927	0.168801	-0.105129	-0.182602	-0.0539392	-0.151107
42.8667	-0.567847	-0.0979712	-0.33478	-0.355777	-0.345402	-0.150939	0.067985			42.8667	0.12755	0.294887	0.665873	0.0197015	-0.125531	0.0850261	0.392666			42.8667	-0.0458331	0.198722	0.400609	-0.10404	-0.178766	-0.180943	0.229896			42.8667	-0.275077	-0.0219937	0.106852	-0.191761	-0.260813	0.0705259	-0.314207
42.9	-0.0348966	0.00926409	-0.32195	-0.407707	-0.446746	-0.213743	0.00397332			42.9	-0.0036715	0.579457	0.241654	-0.0910317	0.00446473	-0.00698597	0.534283			42.9	-0.407234	-0.0402088	0.361831	-0.0411851	-0.184899	0.204003	0.238994			42.9	-0.317839	0.149056	0.431115	-0.156915	-0.120268	0.426949	-0.310335
42.9333	0.615727	-0.283678	-0.148871	-0.348887	-0.462448	-0.196834	-0.423895			42.9333	-0.116248	0.69161	0.41981	-0.189417	0.11671	0.0443974	0.839255			42.9333	-0.234528	0.305479	0.253059	-0.06355	-0.171859	0.0147444	0.668851			42.9333	-0.250641	0.451592	0.117499	-0.118197	-0.0743996	0.110757	-0.214508
42.9667	-0.37688	0.1077	0.473472	-0.339536	-0.404426	-0.218574	0.067985			42.9667	-0.0238726	0.439382	0.823359	-0.0209273	-0.146414	0.0455924	1.99713			42.9667	-0.0840834	0.0960328	0.473923	-0.103434	-0.260002	0.362237	0.157189			42.9667	-0.357983	0.159528	0.13831	-0.109969	-0.268458	0.00326443	-0.162722
43	-0.554759	0.0333215	-0.272736	-0.516246	-0.339709	-0.254807	0.324032			43	0.0884768	0.494604	0.957077	0.0870177	-0.205408	0.197353	3.38493			43	-0.114901	0.204823	0.303892	0.0173337	-0.112402	-0.0149295	0.422274			43	-0.202643	0.0536403	0.359003	-0.2208	-0.478394	0.0673828	-0.336954
43.0333	-0.629586	-0.373859	-0.321171	-0.159223	-0.465563	-0.307949	0.33077			43.0333	0.138457	0.874991	0.983325	-0.060361	-0.163642	0.214082	2.05098			43.0333	-0.366949	0.245492	0.340826	0.0234823	-0.224216	-0.054679	0.0518496			43.0333	-0.305331	0.0286228	0.0695857	0.0144125	-0.219649	0.143445	-0.192245
43.0667	-0.495558	0.000833893	-0.23852	-0.267053	-0.489146	-0.193211	0.12189			43.0667	0.0713073	0.451005	0.897164	-0.285811	-0.343235	-0.0846586	1.57559			43.0667	-0.207519	0.00554401	0.296291	0.0535187	-0.184466	0.0665758	0.367966			43.0667	-0.234642	0.274724	0.181868	-0.0431805	-0.190247	0.0636112	-0.24403
43.1	-0.390699	0.141488	0.063409	-0.145686	-0.613371	-0.0265387	-0.151002			43.1	0.0207067	0.64568	0.751714	-0.0269021	-0.216371	0.0384226	1.74927			43.1	-0.424429	0.259726	0.0281499	0.0283864	-0.116699	-0.157694	0.00882929			43.1	-0.106064	0.0518948	0.145086	-0.171918	-0.047937	0.157903	0.0158645
43.1333	-0.115948	-0.434873	0.0973096	-0.265503	-0.0156407	-0.0325776	-0.258812			43.1333	0.100259	0.357779	0.756662	-0.169103	-0.257093	0.0599319	1.65139			43.1333	-0.0865798	-0.00564007	0.0800743	-0.199442	-0.17572	-0.0187735	0.0583164			43.1333	-0.218642	-0.136608	-0.00688236	-0.104161	-0.229058	0.034695	-0.106097
43.1667	-0.535084	0.120208	-0.0446903	-0.344971	0.0370135	-0.329688	0.145473			43.1667	-0.232096	0.435405	0.747167	-0.18145	-0.101516	-0.113338	1.68144			43.1667	-0.376632	0.099083	0.170029	-0.0219502	-0.149327	0.0230722	0.115776			43.1667	-0.367583	0.145565	0.0182843	-0.0572159	-0.151435	0.00263584	-0.159335
43.2	-0.475224	-0.151904	-0.0979772	-0.192524	-0.568113	-0.259638	0.0410327			43.2	0.094407	0.783779	0.486261	-0.0850569	0.0253476	0.166284	0.905809			43.2	-0.167801	-0.0402088	0.191438	-0.0482325	0.0560737	0.00286966	0.334791			43.2	-0.151153	0.292178	0.268016	-0.29146	-0.0655787	0.115157	-0.190309
43.2333	0.25528	-0.2693	-0.000157622	-0.465419	-0.445925	-0.121952	-0.393573			43.2333	0.271142	0.412012	0.531123	-0.0659375	-0.188179	0.0396176	0.590998			43.2333	-0.281265	0.346148	0.203633	0.0533128	-0.230567	0.032057	0.393287			43.2333	-0.0909371	0.403302	0.326093	0.0018292	0.0202775	0.235851	-0.17821
[truncated: 7,702 more rows]

## Sheet: Fig.10d
Cumulative distribution
[truncated: 139 more rows]

## Sheet: Fig.10e
Cumulative distribution
[truncated: 127 more rows]
