# Supplementary material for: Soluble amyloid-β precursor peptide does not regulate GABAB receptor activity
Source: eLife journal article supplement (doi:10.7554/elife.82082), 2023-01-23
Supplement: supp [file elife_poa_e82082_Figure_1_source_data_1.xlsx]

## Sheet: Fig. 1b
APP17 to buffer for background substraction							APP17 to SD1/2								scAPP17 to buffer for background substraction							scAPP17 to SD1/2
DH	INJV	Xt	Mt	XMt	NDH		DH	INJV	Xt	Mt	XMt	NDH			DH	INJV	Xt	Mt	XMt	NDH		DH	INJV	Xt	Mt	XMt	NDH
-0.03125	0.5	0	1	0.000745711	-208.317		-1.76197	0.5	0	0.03	0.02486	-11746.5			-0.03592	0.5	0	0.03	0.02486	-239.445		-0.32572	0.5	0	0.03	0.02486	-2171.49
-0.07336	1.5	0.000743862	0.99752	0.00299	-163.026		-6.22814	1.5	0.000743862	0.02993	0.0998	-13840.3			-0.16544	1.5	0.000743862	0.02993	0.0998	-367.648		-0.75553	1.5	0.000743862	0.02993	0.0998	-1678.95
-0.08427	1.5	0.00296	0.99012	0.00526	-187.272		-6.17984	1.5	0.00296	0.0297	0.17529	-13733			-0.15823	1.5	0.00296	0.0297	0.17529	-351.632		-0.69173	1.5	0.00296	0.0297	0.17529	-1537.17
-0.07119	1.5	0.00517	0.98277	0.00754	-158.209		-6.03516	1.5	0.00517	0.02948	0.25134	-13411.5			-0.18167	1.5	0.00517	0.02948	0.25134	-403.714		-0.6804	1.5	0.00517	0.02948	0.25134	-1512
-0.13135	1.5	0.00736	0.97548	0.00984	-291.883		-6.00354	1.5	0.00736	0.02926	0.32795	-13341.2			-0.08459	1.5	0.00736	0.02926	0.32795	-187.981		-0.65108	1.5	0.00736	0.02926	0.32795	-1446.85
-0.0667	1.5	0.00953	0.96824	0.01215	-148.23		-6.03114	1.5	0.00953	0.02905	0.40511	-13402.5			-0.19392	1.5	0.00953	0.02905	0.40511	-430.944		-0.59679	1.5	0.00953	0.02905	0.40511	-1326.2
-0.03787	1.5	0.01168	0.96105	0.01448	-84.1571		-5.94199	1.5	0.01168	0.02883	0.48282	-13204.4			-0.15993	1.5	0.01168	0.02883	0.48282	-355.404		-0.61284	1.5	0.01168	0.02883	0.48282	-1361.87
-0.10853	1.5	0.01382	0.95392	0.01683	-241.174		-5.90731	1.5	0.01382	0.02862	0.56109	-13127.4			-0.15044	1.5	0.01382	0.02862	0.56109	-334.308		-0.21917	1.5	0.01382	0.02862	0.56109	-487.039
-0.11236	1.5	0.01594	0.94683	0.0192	-249.681		-5.67929	1.5	0.01594	0.02841	0.63992	-12620.7			-0.1424	1.5	0.01594	0.02841	0.63992	-316.435		-0.56617	1.5	0.01594	0.02841	0.63992	-1258.15
-0.05188	1.5	0.01804	0.9398	0.02158	-115.289		-5.52268	1.5	0.01804	0.02819	0.71929	-12272.6			-0.16865	1.5	0.01804	0.02819	0.71929	-374.784		-0.58262	1.5	0.01804	0.02819	0.71929	-1294.72
-0.05479	1.5	0.02013	0.93282	0.02398	-121.758		-5.26402	1.5	0.02013	0.02798	0.79923	-11697.8			-0.18424	1.5	0.02013	0.02798	0.79923	-409.419		-0.62249	1.5	0.02013	0.02798	0.79923	-1383.32
-0.08405	1.5	0.0222	0.92589	0.02639	-186.777		-4.77069	1.5	0.0222	0.02778	0.87972	-10601.5			-0.09913	1.5	0.0222	0.02778	0.87972	-220.28		-0.4653	1.5	0.0222	0.02778	0.87972	-1033.99
-0.06952	1.5	0.02425	0.91901	0.02882	-154.492		-4.41945	1.5	0.02425	0.02757	0.96076	-9821			-0.12414	1.5	0.02425	0.02757	0.96076	-275.862		-0.55417	1.5	0.02425	0.02757	0.96076	-1231.48
-0.02838	1.5	0.02629	0.91218	0.03127	-63.0574		-3.35921	1.5	0.02629	0.02737	1.04236	-7464.92			-0.08508	1.5	0.02629	0.02737	1.04236	-189.065		-0.55566	1.5	0.02629	0.02737	1.04236	-1234.79
-0.03804	1.5	0.02831	0.90539	0.03374	-84.532		-2.41807	1.5	0.02831	0.02716	1.12451	-5373.48			-0.12387	1.5	0.02831	0.02716	1.12451	-275.273		-0.56509	1.5	0.02831	0.02716	1.12451	-1255.75
-0.07745	1.5	0.03032	0.89866	0.03622	-172.112		-1.63112	1.5	0.03032	0.02696	1.20721	-3624.72			-0.0857	1.5	0.03032	0.02696	1.20721	-190.449		-0.58521	1.5	0.03032	0.02696	1.20721	-1300.47
-0.03567	1.5	0.0323	0.89197	0.03871	-79.2738		-1.11364	1.5	0.0323	0.02676	1.29048	-2474.76			-0.12904	1.5	0.0323	0.02676	1.29048	-286.763		-0.52356	1.5	0.0323	0.02676	1.29048	-1163.47
-0.04531	1.5	0.03427	0.88533	0.04123	-100.685		-0.76776	1.5	0.03427	0.02656	1.37429	-1706.12			-0.11188	1.5	0.03427	0.02656	1.37429	-248.619		-0.48994	1.5	0.03427	0.02656	1.37429	-1088.75
-0.05481	1.5	0.03623	0.87873	0.04376	-121.79		-0.57881	1.5	0.03623	0.02636	1.45866	-1286.25			-0.13677	1.5	0.03623	0.02636	1.45866	-303.933		-0.49317	1.5	0.03623	0.02636	1.45866	-1095.92
-0.06465	1.5	0.03817	0.87218	0.04631	-143.656		-0.44647	1.5	0.03817	0.02617	1.54359	-992.16			-0.12553	1.5	0.03817	0.02617	1.54359	-278.948		-0.54359	1.5	0.03817	0.02617	1.54359	-1207.98
-0.05813	1.5	0.04009	0.86568	0.04887	-129.181		-0.39611	1.5	0.04009	0.02597	1.62907	-880.251			-0.1297	1.5	0.04009	0.02597	1.62907	-288.229		-0.50198	1.5	0.04009	0.02597	1.62907	-1115.52
-0.04502	1.5	0.04199	0.85922	0.05145	-100.055		-0.35488	1.5	0.04199	0.02578	1.7151	-788.621			-0.07016	1.5	0.04199	0.02578	1.7151	-155.915		-0.45973	1.5	0.04199	0.02578	1.7151	-1021.63
-0.04723	1.5	0.04388	0.85281	0.05405	-104.948		-0.28122	1.5	0.04388	0.02558	1.80169	-624.924			-0.13838	1.5	0.04388	0.02558	1.80169	-307.512		-0.63169	1.5	0.04388	0.02558	1.80169	-1403.75
-0.05801	1.5	0.04575	0.84644	0.05667	-128.907		-0.30012	1.5	0.04575	0.02539	1.88884	-666.937			-0.13226	1.5	0.04575	0.02539	1.88884	-293.902		-0.55145	1.5	0.04575	0.02539	1.88884	-1225.44
-0.05976	1.5	0.0476	0.84011	0.0593	-132.807		-0.22655	1.5	0.0476	0.0252	1.97654	-503.436			-0.14953	1.5	0.0476	0.0252	1.97654	-332.292		-0.43204	1.5	0.0476	0.0252	1.97654	-960.095
-0.07091	1.5	0.04944	0.83383	0.06194	-157.584		-0.26	1.5	0.04944	0.02501	2.06479	-577.772			-0.12755	1.5	0.04944	0.02501	2.06479	-283.452		-0.46499	1.5	0.04944	0.02501	2.06479	-1033.31
	--	0.05126	0.82759	--				--	0.05126	0.02483	--					--	0.05126	0.02483	--				--	0.05126	0.02483	--
Abbreviations
DH	Experimental heat change resulting from injection i, in μcal/injection
INJV	Volume of injectant added for the injection i
Xt	Concentration of injected solute in the cell before each injection
Mt	Concentration of macromolecule in the cell before each injection i, after correction for volume displacement
XMt	Molar ratio of ligand to macromolecule after injection i
NDH	Normalized heat change for injection i, in calories per mole of injectant added

## Sheet: Fig. 1c
1 µM APP17-TMR + vehicle	1 µM APP17-TMR + 10 µM APP17	1 µM APP17-TMR + 10 µM sc-APP17	1 µM scAPP17-TMR + vehicle
4497.44	-2021.68	-2258.89	-3333.1
2085.65	-2484.76	5292.44	78.3611
5456.89	3998.31	3275.31	413.139
5245.89	787.139	7443.31	-134.611
4069.56	3533.89	3604.56	1036.89
4130.39	2421.06	3063.31	127.806
2161.47	1458.72	2469.06	5810.97
2264.47	-221.778	3995.22	-2879.19
1927.39	-95.7778	2816.72	-1733.94
1292.06	1469.89	1868.22	-2047.28
1193.72	982.722	5984.14	1900.47
2997.81	-314.111	378.639	668.972
